# Supplementary material for: Tempo-spatial variation of the late Mesozoic volcanism in SoutheastChina testing the western Paleo-Pacific Plate subduction models
Source: Copernicus journal article supplement (doi:10.5194/se-2019-76), 2019-05-08
Supplement: Supplementary file 2 [file 2019.04-Mz2 volcanism implicatiion-submittion-Supp tables.pdf › 2019.04-Mz2 volcanism implicatiion-submittion-Supp tables.pdf]

Table RD1 List of the upper Mesozoic volcanic and pyroclastic rock samples with zircon U-Pb isotope dating data in SE China

| 1                                                                                                              | Sample     | Village /town | Formation / Group (Gr) | Latitude N | Longitude E | Lithology        | 2  | 3  | Age (Ma) | 1σ (Ma) | 4    | MSWD | Prob |
|----------------------------------------------------------------------------------------------------------------|------------|---------------|------------------------|------------|-------------|------------------|----|----|----------|---------|------|------|------|
| <b>Zhejiang province</b>                                                                                       |            |               |                        |            |             |                  |    |    |          |         |      |      |      |
| <sup>5</sup> L1, Tongjia-Yanxia, Shouchang (A1, A4, A10-11, A14-15 from Li et al., 2019; other from this work) |            |               |                        |            |             |                  |    |    |          |         |      |      |      |
| A1                                                                                                             | 1101-02    | Tongjia       | Lower Laocun           | 292528.5   | 1190952.7   | Trachyte         | 15 | 10 | 138.2    | 2.0     | 1.45 | 1.40 | 0.21 |
| A2                                                                                                             | 0128-02    | Tongjia       | Lower Laocun           | 292439.4   | 1190919.6   | Ignimbrite       | 15 | 15 | 131.4    | 1.4     | 1.07 | 1.17 | 0.30 |
| A3                                                                                                             | 0128-04    | Tongjia       | Laocun                 | 292429.2   | 1190937.2   | Tuff             | 15 | 14 | 134.8    | 2.4     | 1.78 | 1.30 | 0.27 |
| A4                                                                                                             | 1101-03    | Tongjia       | Middle Laocun          | 292431.2   | 1190922.4   | Trachyte         | 15 | 14 | 128.2    | 1.4     | 1.09 | 1.04 | 0.41 |
| A5                                                                                                             | ZC-06      | Zhoucun       | Top Laocun             | 292313.1   | 1191049.9   | Shard tuff       | 16 | 15 | 125.0    | 1.0     | 0.80 | 0.00 | 1.00 |
| A6                                                                                                             | ZC-10      | Zhoucun       | Lower Huangjian        | 292310.2   | 1191052.6   | Ignimbrite       | 15 | 13 | 116.4    | 2.4     | 1.80 | 0.80 | 0.50 |
| A7                                                                                                             | ZC-11      | Zhoucun       | Middle Huangjian       | 292308.6   | 1191054.1   | Ignimbrite       | 15 | 14 | 118.0    | 1.7     | 1.44 | 0.89 | 0.56 |
| A8                                                                                                             | ZC-13      | Zhoucun       | Basal Shouchang        | 292302.5   | 1191059.3   | Ignimbrite       | 19 | 18 | 150.9    | 1.1     | 0.73 | 0.17 | 1.00 |
| A9                                                                                                             | ZC-15      | Zhoucun       | Lower Shouchang        | 292301.9   | 1191100.4   | Tuff             | 15 | 12 | 133.0    | 2.4     | 1.80 | 1.30 | 0.20 |
| A10                                                                                                            | ZC-13B     | Zhoucun       | Basal Huangjiang       | 292253.3   | 1191118.1   | Trachyte         | 15 | 11 | 130.9    | 1.5     | 1.15 | 0.89 | 0.88 |
| A11                                                                                                            | ZC-20      | Zhoucun       | Lower Shouchang        | 292249.4   | 1191122.5   | Tephros          | 15 | 15 | 127.1    | 1.1     | 0.87 | 0.94 | 0.51 |
| A12                                                                                                            | ZC-23      | Yanxia        | Middle Shouchang       | 292246.8   | 1191105.8   | Ignimbrite       | 15 | 15 | 123.8    | 1.0     | 0.81 | 0.15 | 1.00 |
| A13                                                                                                            | ZC-43      | Yanxia        | Middle Hengshan        | 292315.7   | 1191215.5   | Tuff             | 20 | 12 | 120.9    | 1.2     | 0.99 | 0.41 | 0.97 |
| A14                                                                                                            | ZC-27      | Yanxia        | Upper Hengshan         | 292325.0   | 1191218.7   | Tuff             | 15 | 12 | 126.3    | 1.4     | 1.11 | 1.40 | 0.18 |
| A15                                                                                                            | ZC-29      | Yanxia        | Middle Hengshan        | 292256.2   | 1191232.6   | Trachyte         | 15 | 12 | 129.3    | 1.7     | 1.31 | 1.40 | 0.20 |
| L2, Zhongdai, Jinhua (B1, B3, and B5 from Li et al., 2019; B2 and B4 from this work)                           |            |               |                        |            |             |                  |    |    |          |         |      |      |      |
| B1                                                                                                             | 150117-01  | Yangyuan      | Upper Moshishan Gr     | 285923.0   | 1192034.0   | Dacite           | 20 | 10 | 130.8    | 1.4     | 1.1  | 0.9  | 0.54 |
| B2                                                                                                             | 13102-01   | Shangyingtou  | Top Moshishan Gr       | 285928.0   | 1192035.2   | Dacite           | 20 | 12 | 127.0    | 1.7     | 1.3  | 0.7  | 0.72 |
| B3                                                                                                             | 13102-02   | Laoyingtanbei | Top Moshishan Gr       | 290003.6   | 1191958.1   | Ignimbrite       | 15 | 13 | 131.6    | 2.0     | 1.5  | 1.5  | 0.11 |
| B4                                                                                                             | 13102-03   | Laoyingtanbei | Middle Zhongdai        | 290004.8   | 1191957.2   | Tuff             | 15 | 8  | 98.2     | 2.4     | 2.4  | 1.5  | 0.12 |
| B5                                                                                                             | 13102-04   | Laoyingtanbei | Laoyingtanbei          | 290014.1   | 1191934.7   | Ignimbrite       | 20 | 5  | 125.8    | 3.6     | 2.9  | 2.1  | 0.09 |
| L3, Guantou-Fenglin, Yongkang (C7 from Li et al., 2019; the left from this work)                               |            |               |                        |            |             |                  |    |    |          |         |      |      |      |
| C1                                                                                                             | 0126-01    | Houyueling    | Top Moshishan Gr       | 284706.4   | 1200435.0   | Dacitic tuff     | 20 | 17 | 116.8    | 1.1     | 0.94 | 0.94 | 0.52 |
| C2                                                                                                             | 0126-02    | Houyueling    | Top Moshishan Gr       | 284709.6   | 1200437.4   | Shard tuff       | 15 | 13 | 123.1    | 1.2     | 0.97 | 0.30 | 0.99 |
| C3                                                                                                             | 1102-01    | Houyueling    | Middle Guantou         | 284715.9   | 1200450.8   | Shard tuff       | 15 | 13 | 113.1    | 2.2     | 1.95 | 1.20 | 0.29 |
| C4                                                                                                             | 0127-01    | Guantou       | Lower Chaochuan        | 284753.6   | 1200539.4   | Tuff             | 20 | 14 | 117.6    | 1.9     | 1.62 | 1.24 | 0.45 |
| C5                                                                                                             | 0127-10    | Chaochuan     | Lower Chaochuan        | 284815.1   | 1200621.6   | Dacitic tuff     | 15 | 15 | 113.1    | 1.2     | 1.06 | 1.16 | 0.30 |
| C6                                                                                                             | 1102-02    | Chaochuan     | Moshishan Gr           | 285157.6   | 1200436.1   | Dacitic Trachyte | 15 | 14 | 124.4    | 1.1     | 0.88 | 1.07 | 0.38 |
| C7                                                                                                             | 1309-11    | Fenglin       | Moshishan Gr           | 284903.9   | 1200712.8   | Trachyandesite   | 20 | 14 | 134.5    | 2.2     | 1.64 | 0.49 | 0.96 |
| L4, Laozhu, Lishui (D3 and D4 from Li et al., 2019; D7 from Ma et al., 2016; and the left from this work)      |            |               |                        |            |             |                  |    |    |          |         |      |      |      |
| D1                                                                                                             | 1103-01    | Xiaqiao       | Top Moshishan          | 283148.7   | 1194517.2   | Trachyte         | 15 | 15 | 119.1    | 2.1     | 1.76 | 1.4  | 0.20 |
| D2                                                                                                             | LZ2-17     | Xiaqiao       | Middle Guantou         | 283237.6   | 1194502.2   | Shard tuff       | 20 | 5  | 115.5    | 1.2     | 1.04 | 1.1  | 0.32 |
| D3                                                                                                             | 1310-01    | NE Taocun     | Moshishan              | 283254.7   | 1194427.7   | Andesite         | 20 | 11 | 122.8    | 1.9     | 1.55 | 1.5  | 0.14 |
| D4                                                                                                             | 150118-02  | Chikeng       | Moshishan              | 283245.6   | 1194500.6   | Ignimbrite       | 20 | 15 | 117.8    | 2.2     | 1.87 | 1.6  | 0.59 |
| D5                                                                                                             | 1103-03    | Xiaqiao       | Top Guantou            | 283215.7   | 1194523.3   | Tuff             | 15 | 14 | 106.9    | 1.7     | 1.59 | 1.5  | 0.17 |
| D6                                                                                                             | ZJ66       | Liufan        | Upper Chaochuan        | Unavaible  |             | Tuff             | 22 | 22 | 118.0    | 1.0     | 0.85 | 1.8  |      |
| D7                                                                                                             | 1103-08    | Chikeng       | Top Guantou            | 283308.8   | 1194557.0   | Trachyte         | 15 | 15 | 109.4    | 1.8     | 1.65 | 0.5  | 0.93 |
| M1, NW Shengzhou basin (Li JH et al., 2014)                                                                    |            |               |                        |            |             |                  |    |    |          |         |      |      |      |
|                                                                                                                | zj28       | Shengzhou     | Moshishan Gr           | 293530.7   | 1203558.6   | Tuff             | 14 | 14 | 129.0    | 2.0     |      | 1.80 |      |
| M2, central Shengzhou basin (zj30 from Li JH et al., 2014; others from Li CL et al., 2014)                     |            |               |                        |            |             |                  |    |    |          |         |      |      |      |
|                                                                                                                | zj30       | Shengzhou     | Guantou                | 292958.7   | 1204818.4   | Tuff             | 13 | 10 | 119.0    | 4.0     |      | 2.90 |      |
|                                                                                                                | DY11-130-1 | W Xinyue      | Shouchang              | 294128.0   | 1203354.0   | Rhyelite         | 20 | 17 | 133.0    | 1.0     |      | 1.20 |      |
|                                                                                                                | DY11-132-1 | W Xinyue      | Hengshan               | 294601.0   | 1203629.0   | Rhyelite         | 20 | 18 | 131.4    | 0.6     |      | 1.50 |      |
|                                                                                                                | DY11-133-1 | W Xinyue      | Lower Jiuliping        | 294606.0   | 1203941.0   | Rhyelite         | 20 | 16 | 131.6    | 1.4     |      | 1.40 |      |
| M3, W Tiantai basin (zj53 from Li JH et al., 2014; another one from Li CL et al., 2014)                        |            |               |                        |            |             |                  |    |    |          |         |      |      |      |
|                                                                                                                | zj53       | Tiantai       | Guantou                | 290910.7   | 1204848.6   | Tuff             | 11 | 9  | 124.0    | 5.0     |      | 0.49 |      |
|                                                                                                                | DY11-10-2  | Tiantai       | Top Jiuliping          | 291510.0   | 1204223.0   | Rhyelite         | 20 | 16 | 128.6    | 0.6     |      | 0.47 |      |
| M4, Jingling, Xinchang (Zhang et al., 2014)                                                                    |            |               |                        |            |             |                  |    |    |          |         |      |      |      |
|                                                                                                                | XC06       | Anxi          | Top Moshishan Gr       | 292326.5   | 1204696.3   | Ignimbrite       | 17 | 12 | 126.0    | 3.0     | 2.38 | 0.18 | 1.00 |
|                                                                                                                | XC07       | Jingling      | Middle Guantou         | 292142.1   | 1204646.3   | Ignimbrite       | 16 | 15 | 117.0    | 2.0     | 1.71 | 0.42 | 0.97 |
|                                                                                                                | FQ03-1     | Anxi          | Middle Guantou         | 292349.9   | 1204641.0   | Bentonite        | 38 | 34 | 116.0    | 2.0     | 1.72 | 0.73 | 0.85 |
|                                                                                                                | 09XC01     | Anxi          | Middle Guantou         | 292349.5   | 1204642.7   | Bentonite        | 29 | 26 | 119.0    | 2.0     | 1.68 | 0.30 | 0.99 |
| M5, Dongyang (Li JH et al., 2014)                                                                              |            |               |                        |            |             |                  |    |    |          |         |      |      |      |
|                                                                                                                | zj31       | Dongyang      | Moshishan Gr           | 291406.83, | 1202156.4   | Tuff             | 14 | 13 | 136.0    | 1.0     |      | 1.30 |      |
| M6, Yucaotou, Yiwu (former four samples from Liu et al., 2012; others from Li CL et al., 2014)                 |            |               |                        |            |             |                  |    |    |          |         |      |      |      |
|                                                                                                                | DS01       | Yucaotou      | Lower Dashuang         | 290700.0   | 1200224.0   | Lithic tuff      | 20 | 19 | 140.3    | 1.0     | 0.71 | 0.64 | 0.86 |
|                                                                                                                | DS02       | Yucaotou      | Mid Dashuang           | 290655.0   | 1200225.0   | Tuff             | 22 | 22 | 137.7    | 1.3     | 0.94 | 1.40 | 0.13 |
|                                                                                                                | DS03       | Yucaotou      | Upper Dashuang         | 290624.0   | 1200238.0   | Lithic tuff      | 20 | 20 | 135.3    | 0.9     | 0.67 | 0.90 | 0.58 |
|                                                                                                                | GW03       | Yucaotou      | Lower Gaowu            | 290601.0   | 1200246.0   | Ignimbrite       | 20 | 20 | 135.4    | 0.9     | 0.66 | 1.00 | 0.46 |



|                                                                                                                       |           |                  |             |             |                |    |    |       |     |      |      |      |
|-----------------------------------------------------------------------------------------------------------------------|-----------|------------------|-------------|-------------|----------------|----|----|-------|-----|------|------|------|
| DY11-23-4                                                                                                             | Yiwu      | Lower Chawan     | 291224.0    | 1201542.0   | Dacite         | 20 | 6  | 135.6 | 1.6 | 1.18 | 0.32 |      |
| DY11-24-6                                                                                                             | Yiwu      | Upper Gaowu      | 290924.0    | 1202003.0   | Tuff           | 20 | 10 | 140.4 | 1.9 | 1.35 | 0.18 |      |
| DY11-146-1                                                                                                            | Yiwu      | Upper Dashuang   | 290756.0    | 1200234.0   | Rhyolite       | 20 | 16 | 145.1 | 1.5 | 1.03 | 0.72 |      |
| DY11-152-1                                                                                                            | Yiwu      | Middle Gaowu     | 290524.0    | 1195821.0   | Trachyte       | 20 | 16 | 142.0 | 1.1 | 0.77 | 0.37 |      |
| M7, Pujiang (Liu et al., 2014)                                                                                        |           |                  |             |             |                |    |    |       |     |      |      |      |
| HS01                                                                                                                  | Pujiang   | Upper Hengshan   | 292404.2    | 1195149.7   | Trachydacite   | 20 | 18 | 118.0 | 1.0 | 0.85 | 0.38 | 0.99 |
| HS02                                                                                                                  | Pujiang   | Lower Hengshan   | 292341.1    | 1195145.2   | Trachy basalt  | 11 | 9  | 121.5 | 2.0 | 1.65 | 0.45 | 0.85 |
| HS03                                                                                                                  | Pujiang   | Lower Hengshan   | 292341.1    | 1195145.2   | Trachy basalt  | 20 | 18 | 123.7 | 2.0 | 1.62 | 3.00 | 0.00 |
| SC02                                                                                                                  | Pujiang   | Upper Shouchan   | 293007.5    | 1195704.5   | Tuff           | 20 | 15 | 123.0 | 2.0 | 1.63 | 0.12 | 1.00 |
| HJ07                                                                                                                  | Pujiang   | Lower Huangjian  | 293108.5    | 1195700.7   | Ignimbrite     | 21 | 20 | 130.0 | 1.0 | 0.77 | 0.51 | 0.96 |
| LC04                                                                                                                  | Pujiang   | Middle Laocun    | 293356.3    | 1195455.6   | Ignimbrite     | 24 | 24 | 136.0 | 1.0 | 0.74 | 0.24 | 1.00 |
| M8, W Pujiang (Li JH et al., 2014)                                                                                    |           |                  |             |             |                |    |    |       |     |      |      |      |
| zj36                                                                                                                  | W Pujiang | Moshishan Gr     | 29199.3     | 1193959.7   | Tuff           | 14 | 13 | 130.0 | 1.0 |      | 0.44 |      |
| M9, Jiande Group in Jiande (Samples with letters LC, HJ, and SC from Liu et al., 2014; others from Wang et al., 2016) |           |                  |             |             |                |    |    |       |     |      |      |      |
| SC01                                                                                                                  | Jiande    | Lower Shouchang  | 292113.8    | 1190934.2   | Ignimbrite     | 20 | 18 | 130.5 | 1.1 | 0.84 | 0.46 | 0.97 |
| HJ01                                                                                                                  | Jiande    | Lower Huangjian  | 291813.4    | 1191009.0   | Tuff           | 22 | 19 | 129.1 | 1.4 | 1.08 | 0.26 | 1.00 |
| HJ02                                                                                                                  | Jiande    | Upper Huangjian  | 291625.2    | 1190928.1   | Tuff           | 16 | 16 | 127.3 | 1.1 | 0.86 | 0.13 | 1.00 |
| HJ05                                                                                                                  | Jiande    | Basal Huangjian  | 291605.2    | 1190828.5   | Rhyolite       | 15 | 12 | 130.2 | 1.2 | 0.92 | 0.25 | 0.99 |
| LC01                                                                                                                  | Jiande    | Upper Laocun     | 291624.5    | 1190519.8   | Ignimbrite     | 20 | 20 | 131.7 | 1.1 | 0.84 | 0.30 | 1.00 |
| LC02                                                                                                                  | Jiande    | Middle Laocun    | 291652.0    | 1190432.2   | Ignimbrite     | 25 | 25 | 135.5 | 1.0 | 0.74 | 0.21 | 1.00 |
| T0003                                                                                                                 | Laocun    | Lower Laocun     | 291820.0    | 1190359.0   | Tuff           | 17 | 10 | 135.3 | 1.6 | 1.18 | 0.65 | 0.75 |
| T0004                                                                                                                 | Laocun    | Lower Laocun     | 291813.0    | 1190413.0   | Crystal tuff   | 14 | 12 | 135.5 | 2.6 | 1.92 | 1.50 | 0.11 |
| T0007                                                                                                                 | Laocun    | Upper Loacun     | 291705.0    | 1190353.0   | Crystal tuff   | 16 | 12 | 130.7 | 1.6 | 1.22 | 0.69 | 0.75 |
| T0011                                                                                                                 | Laocun    | Upper Loacun     | 291709.0    | 1190701.0   | Rhyoporphyry   | 10 | 5  | 128.7 | 2.1 | 1.63 | 0.46 | 0.77 |
| M10, Jinhua (Li CL et al., 2014)                                                                                      |           |                  |             |             |                |    |    |       |     |      |      |      |
| DY11-155-1                                                                                                            | SW Jinhua | Lower Xishantou  | 285625.0    | 1192404.0   | Rhyolte        | 20 | 18 | 140.2 | 1.0 | 0.71 | 1.16 |      |
| M11, Yongkang (10ZJ109 from Zhang et al., 2018; another from Li JH et al., 2014)                                      |           |                  |             |             |                |    |    |       |     |      |      |      |
| DY11-120-1                                                                                                            | Yongkang  | Top Xishantou    | 284701.0    | 1200633.0   | Rhyolte        | 18 | 12 | 136.4 | 1.2 | 0.88 | 2.20 |      |
| zj47-1                                                                                                                | Yongkang  | Top Guantou      | 284717.6    | 1200550.9   | Tuff           | 11 | 11 | 119.0 | 2.0 | 1.68 | 1.80 |      |
| zj47-2                                                                                                                | Yongkang  | Top Guantou      | 284717.6    | 1200550.9   | Tuff           | 12 | 10 | 104.0 |     | 2    | 1.92 | 0.6  |
| zj49                                                                                                                  | Yongkang  | Moshishan Gr     | 294821.0    | 1195930.0   | Rhyolite       | 14 | 13 | 129.0 | 1.0 | 0.78 | 0.17 |      |
| 10ZJ109                                                                                                               | Yongkang  | Guantou          | 284730.0    | 1200532.0   | Rhyolte        | 6  | 6  | 133.0 | 3.0 | 2.26 | 0.40 |      |
| 10ZJ109                                                                                                               | Yongkang  | Guantou          | 284730.0    | 1200532.0   | Rhyolte        | 14 | 11 | 106.0 | 3.0 | 2.83 | 0.80 |      |
| M12, Yanzhai (Ma et al., 2016)                                                                                        |           |                  |             |             |                |    |    |       |     |      |      |      |
| ZJ90                                                                                                                  | Yanzhai   | Guantou          | Unavaiaible | Unavaiaible | Tuff           | 30 | 30 | 122.0 | 1.0 | 0.82 | 3.30 |      |
| ZJ93                                                                                                                  | Yanzhai   | Chaochuan        | Unavaiaible | Unavaiaible | Tuff           | 17 | 17 | 112.0 | 1.0 | 0.89 | 1.90 |      |
| WYS08                                                                                                                 | Yanzhai   | Chaochuan        | Unavaiaible | Unavaiaible | Tuff           | 18 | 18 | 114.0 | 1.0 | 0.88 | 2.70 |      |
| WYS09                                                                                                                 | Yanzhai   | Chaochuan        | Unavaiaible | Unavaiaible | Tuff           | 12 | 12 | 114.0 | 2.0 | 1.75 | 2.40 |      |
| M13, Laozhu, Lishui (ZJ66 from Ma et al., 2016; 10ZJ064 from Zhang et al., 2018; and others from Wang et al., 2015)   |           |                  |             |             |                |    |    |       |     |      |      |      |
| ZJ66                                                                                                                  | Laozhu    | Lower Chaochuan  | Unavaiaible | Unavaiaible | Tuff           | 22 | 22 | 118.0 | 1.0 | 0.85 | 1.80 |      |
| 10ZJ064                                                                                                               | Liucheng  | Chaochuan        | 284143.0    | 1193823.0   | Rhyolite       | 9  | 9  | 130.0 | 2.0 | 1.54 | 1.20 |      |
| 10ZJ064                                                                                                               | Liucheng  | Chaochuan        | 284143.0    | 1193823.0   | Rhyolite       | 12 | 8  | 107.5 | 2.0 | 1.86 | 2.00 | 0.05 |
| T1                                                                                                                    | Zhucun    | Middle Moshishan | Unavaiaible | Unavaiaible | Rhyoporphyry   | 15 | 9  | 124.9 | 2.0 | 1.60 | 0.53 | 0.83 |
| T2                                                                                                                    | Zhucun    | Middle Xishantou | Unavaiaible | Unavaiaible | Tuff           | 14 | 8  | 128.8 | 1.8 | 1.40 | 0.37 | 0.94 |
| T3                                                                                                                    | Zhucun    | Lower Jiuliping  | Unavaiaible | Unavaiaible | Rhyolite       | 13 | 10 | 128.7 | 3.3 | 2.56 | 1.30 | 0.26 |
| M14, Maonong, Songyang (Liu et al., 2012)                                                                             |           |                  |             |             |                |    |    |       |     |      |      |      |
| MN01                                                                                                                  | Maonong   | Lower Maonong    | 282155.0    | 1193752.0   | Dacitic tuff   | 21 | 21 | 177.4 | 1.0 | 0.56 | 0.59 | 0.92 |
| M15, Xujiadun, Jiangshan (Zhang et al., 2009)                                                                         |           |                  |             |             |                |    |    |       |     |      |      |      |
| B1                                                                                                                    | Jiangshan | Upper Ehuling    | 282001.0    | 1183236.3   | Rhyolite       | 17 | 15 | 138.4 | 1.7 | 1.23 | 1.15 | 0.30 |
| N1, Xiaoxiong, Sanmen (Liu et al., 2012)                                                                              |           |                  |             |             |                |    |    |       |     |      |      |      |
| XX06                                                                                                                  | Xiaoxiong | Upper Xiaoxiong  | 290205.0    | 1213730.0   | Rhyolitic tuff | 19 | 15 | 93.8  | 0.6 | 0.59 | 0.96 | 0.49 |
| N2, Taozu (Chen et al., 2008)                                                                                         |           |                  |             |             |                |    |    |       |     |      |      |      |
| ZJ-23                                                                                                                 | Taozu     | ?                | Unavaiaible | Unavaiaible | Rhyolite       | 8  | 7  | 76.3  | 0.8 | 1.05 | 1.40 | 0.22 |
| ZJ-24                                                                                                                 | Taozu     | ?                | Unavaiaible | Unavaiaible | Rhyolite       | 17 | 8  | 87.8  | 1.1 | 1.25 | 2.60 | 0.01 |
| N3, Tangshang, Tiantai (TS01 from Liu et al., 2012; another from Zhang et al., 2018)                                  |           |                  |             |             |                |    |    |       |     |      |      |      |
| TS01                                                                                                                  | Tangshang | Lower Tangshang  | 290818.0    | 1205612.0   | Lithic tuff    | 18 | 18 | 111.3 | 1.0 | 0.85 | 0.67 | 0.84 |
| 10ZJ1025                                                                                                              | Tiantai   | Louwe Thangshang | 290813.0    | 1205630.0   | Ignimbrite     | 10 | 10 | 133.0 | 1.0 | 0.75 | 0.60 |      |
| 10ZJ1025                                                                                                              | Tiantai   | Louwe Thangshang | 290813.0    | 1205630.0   | Ignimbrite     | 6  | 6  | 111.0 | 1.0 | 0.90 | 0.90 |      |
| N4, Jiuliping, Tiantai (JL-02 from Chen et al., 2008; the left from Liu et al., 2012)                                 |           |                  |             |             |                |    |    |       |     |      |      |      |
| JL-02                                                                                                                 | Jiuliping | ?                | Unavaiaible | Unavaiaible | Rhyolite       | 30 | 9  | 101.1 | 1.6 | 1.58 | 1.30 | 0.21 |
| GW01                                                                                                                  | Jiuliping | Mid Gaowu        | 290404.0    | 1205403.0   | Rhyolitic tuff | 18 | 18 | 132.9 | 1.2 | 0.90 | 0.27 | 1.00 |
| GW02                                                                                                                  | Jiuliping | Upper Gaowu      | 290355.0    | 1205420.0   | Rhyolitic tuff | 20 | 20 | 131.7 | 1.5 | 1.14 | 0.15 | 1.00 |
| XST03                                                                                                                 | Jiuliping | Lower Xishantou  | 290356.0    | 1205257.0   | Ignimbrite     | 20 | 20 | 130.5 | 1.0 | 0.77 | 0.47 | 0.98 |
| XST02                                                                                                                 | Jiuliping | Middle Xishantou | 290357.0    | 1205254.0   | Ignimbrite     | 20 | 20 | 128.7 | 1.2 | 0.93 | 0.16 | 1.00 |
| XST01                                                                                                                 | Jiuliping | Upper Xishantou  | 290359.0    | 120554.0    | Ignimbrite     | 20 | 20 | 127.6 | 1.1 | 0.86 | 0.52 | 0.95 |
| CW01                                                                                                                  | Jiuliping | Upper Chawan     | 290350.0    | 1205150.0   | Tuff           | 18 | 18 | 122.0 | 1.8 | 1.48 | 1.40 | 0.12 |



|                                  |              |                    |             |             |                |    |    |       |     |      |      |      |
|----------------------------------|--------------|--------------------|-------------|-------------|----------------|----|----|-------|-----|------|------|------|
| JLP01                            | Jiuliping    | Upper Jiuliping    | 290400.0    | 1205144.0   | Rhyolite       | 21 | 21 | 120.7 | 0.9 | 0.76 | 0.94 | 0.54 |
| N5, Xianju (Li CL et al., 2014)  |              |                    |             |             |                |    |    |       |     |      |      |      |
| DY11-13-3                        | Xianju       | Lower Gaowu        | N285047     | E1203934    | Rhyolite       | 20 | 9  | 142.7 | 2.6 | 1.82 | 0.17 |      |
| DY11-63-3                        | Xianju       | Lower Gaowu        | N285307     | E1203814    | Rhyolite       | 20 | 14 | 141.3 | 1.4 | 0.99 | 1.40 |      |
| N6, Qingyuan (Duan et al., 2013) |              |                    |             |             |                |    |    |       |     |      |      |      |
| 117QY-1-1                        | Wudabao      | Lower Gaowu        | Unavaiaable | Unavaiaable | Ignimbrite     | 25 | 25 | 136.0 | 1.6 | 1.18 | 0.11 | 1.00 |
| 117QY-3-1                        | Wudabao      | Upper Gaowu        | Unavaiaable | Unavaiaable | Ignimbrite     | 25 | 25 | 133.3 | 0.7 | 0.50 | 0.82 | 0.72 |
| 117QY-4-2                        | Zuoxi        | Lower Xishantou    | Unavaiaable | Unavaiaable | Ignimbrite     | 29 | 29 | 132.1 | 1.5 | 1.14 | 0.64 | 0.93 |
| 117QY-10-1                       | Zuoxi        | Upper Xishantou    | Unavaiaable | Unavaiaable | Rhyolite       | 25 | 21 | 127.9 | 1.7 | 1.33 | 0.15 | 1.00 |
| N7, Taishun (Duan et al., 2013)  |              |                    |             |             |                |    |    |       |     |      |      |      |
| 117TS-12-1                       | Xiahong      | Upper Xiaopingtian | Unavaiaable | Unavaiaable | Rhyolitic tuff | 25 | 17 | 114.5 | 1.4 | 1.22 | 0.21 | 1.00 |
| 117TS-3-1                        | Xianghuojian | Middle Taishun     | Unavaiaable | Unavaiaable | Rhyolitic tuff | 25 | 20 | 112.7 | 1.3 | 1.15 | 0.47 | 0.97 |
| 117TS-2-1                        | Xianghuojian | Upper Taishun      | Unavaiaable | Unavaiaable | Rhyolitic tuff | 23 | 13 | 111.7 | 1.6 | 1.43 | 0.41 | 0.96 |

## Jiangxi province

### L5, Shixi, Yanshan

|    |          |             |               |          |           |            |    |    |       |     |      |      |      |
|----|----------|-------------|---------------|----------|-----------|------------|----|----|-------|-----|------|------|------|
| E1 | 1107-01  | Baojiachang | Lower Shixi   | 281558.8 | 1175200.4 | Trachyte   | 15 | 14 | 138.5 | 1.5 | 1.08 | 1.07 | 0.38 |
| E2 | 1107-02  | Baojiachang | Lower Shixi   | 281645.7 | 1175152.5 | Trachyte   | 15 | 12 | 136.1 | 1.3 | 0.96 | 1.08 | 0.37 |
| E3 | 1107-03  | Chating     | Middle Shixi  | 281754.0 | 1175240.2 | Rhyodacite | 15 | 15 | 136.2 | 1.3 | 0.95 | 1.17 | 0.31 |
| E4 | 1107-04  | Chating     | Middle Shixi  | 281754.1 | 1175240.3 | Trachyte   | 15 | 14 | 130.8 | 1.4 | 1.07 | 0.85 | 0.57 |
| E5 | 13103-03 | Zhongzhou   | Lower Ehuling | 281547.4 | 1175456.3 | Tuff       | 15 | 11 | 140.0 | 1.2 | 0.86 | 0.37 | 0.96 |

### L6, Datianchenjia, Guixi

|    |          |              |                |          |           |                |    |    |       |     |      |      |      |
|----|----------|--------------|----------------|----------|-----------|----------------|----|----|-------|-----|------|------|------|
| F1 | 1108-04  | Shangzengjia | Lower Ehuling  | 280804.3 | 1170834.1 | Rhyolitic tuff | 15 | 15 | 136.9 | 1.1 | 0.80 | 0.70 | 0.78 |
| F2 | 1109-05  | Shangzengjia | Middle Ehuling | 280810.7 | 1170844.4 | Rhyolitic tuff | 15 | 11 | 131.9 | 1.5 | 1.14 | 0.80 | 0.61 |
| F3 | 13104-01 | Shangzengjia | ?Luotang Lower | 280814.6 | 1170814.4 | Rhyodacite     | 15 | 14 | 139.8 | 1.2 | 0.86 | 0.73 | 0.70 |

### L60, Aoxi town, Le'an (Li et al., 2019)

|  |             |         |                |          |           |            |    |    |       |     |     |     |      |
|--|-------------|---------|----------------|----------|-----------|------------|----|----|-------|-----|-----|-----|------|
|  | 150127-01zk | Tangang | Lower Daguding | 272441.9 | 1154527.4 | Porphyrite | 20 | 13 | 136.6 | 1.1 | 0.8 | 0.9 | 0.60 |
|  | 150127-02zk | Shitang | Upper Dashuang | 272504.5 | 1154427.6 | Tuff       | 20 | 7  | 128.5 | 1.5 | 1.2 | 0.7 | 0.69 |

### L7, Tiantou, Ningdu (G2 from Li et al., 2019; G1 from this work)

|    |           |                |                  |          |           |                 |    |    |       |     |      |      |      |
|----|-----------|----------------|------------------|----------|-----------|-----------------|----|----|-------|-----|------|------|------|
| G1 | 150124-01 | Baisha         | Lower Ganzhou Gr | 261715.6 | 1155657.0 | Andesite matrix | 20 | 12 | 135.0 | 3.0 | 2.22 | 2.20 | 0.03 |
| G2 | 13109-01  | Baisha, Ningdu | Shixi ?          | 261720.7 | 1155659.4 | Andesite        | 20 | 3  | 138.3 | 5.1 | 3.69 | 0.42 | 0.66 |

### M16, Wushanqiu, Yanshan (Liu et al., 2009)

|       |           |       |             |             |          |    |    |       |     |      |      |      |
|-------|-----------|-------|-------------|-------------|----------|----|----|-------|-----|------|------|------|
| SH003 | Wushanqiu | Shixi | Unavailable | Unavailable | Trachyte | 14 | 13 | 136.4 | 1.5 | 1.10 | 2.70 | 0.00 |
|-------|-----------|-------|-------------|-------------|----------|----|----|-------|-----|------|------|------|

### M16b, Shuangling, Guxi (GX103 from Wu and Wu, 2013; others from Shu et al., 2017)

|         |          |         |             |             |                |    |    |       |     |      |      |  |
|---------|----------|---------|-------------|-------------|----------------|----|----|-------|-----|------|------|--|
| GX103   | Shenyuan | Ehuling | 280924.0    | 1170624.0   | Rhyolite       | 15 | 11 | 134.3 | 1.6 | 1.19 | 1.01 |  |
| 14SY-42 | Shenyuan | Ehuling | Unavailable | Unavailable | Tuff           | 22 | 21 | 137.5 | 1.2 | 0.87 | 0.40 |  |
| 14SY-1  | Shenyuan | Ehuling | Unavailable | Unavailable | Trachyandesite | 16 | 14 | 135.8 | 2.0 | 1.47 | 0.50 |  |
| 14SY-36 | Shenyuan | Shixi   | Unavailable | Unavailable | Tuff           | 17 | 17 | 136.5 | 1.6 | 1.17 | 1.50 |  |
| 14SY-17 | Shenyuan | Shixi   | Unavailable | Unavailable | Tuff           | 20 | 20 | 135.6 | 1.0 | 0.74 | 1.50 |  |

### M17, Tianhuashan, Jiangxi (LSK-30 from Su et al., 2014; the left from Su et al., 2013)

|         |              |          |          |           |              |    |    |       |     |      |      |      |
|---------|--------------|----------|----------|-----------|--------------|----|----|-------|-----|------|------|------|
| LSK-30  | Lengshuikeng | Ehuling  | 280146.0 | 1170547.0 | Rhyolite     | 16 | 16 | 139.9 | 0.9 | 0.64 | 1.80 | 0.02 |
| LSK-107 | Lengshuikeng | Ehuling  | 280146.0 | 1170547.0 | Andesite     | 21 | 12 | 142.2 | 0.8 | 0.54 | 1.20 | 0.29 |
| MD06    | Tianhuashan  | Ehuling  | 271615.0 | 1171144.0 | Ignimbrite   | 39 | 39 | 136.6 | 0.5 | 0.36 | 0.20 | 1.00 |
| SH10-15 | Tianhuashan  | Ehuling  | 280141.0 | 1170532.0 | Tuffite      | 42 | 23 | 129.0 | 0.4 | 0.33 | 1.04 | 0.40 |
| SH10-27 | Tianhuashan  | Daguding | 280208.0 | 1170547.0 | Crystal tuff | 28 | 27 | 143.7 | 0.6 | 0.44 | 2.50 | 0.00 |

### M18, Xiangshan, Le'an (Upper seven samples from Yang et al., 2010, 2013; Samples with letters D and ZK from Guo et al., 2015; the left from Wu et al., 2017)

|             |            |                |             |             |                                     |    |    |       |     |      |      |  |
|-------------|------------|----------------|-------------|-------------|-------------------------------------|----|----|-------|-----|------|------|--|
| XS-30-1     | Xiangshan  | Daguding       | Unavailable | Unavailable | Rhyodacite                          | 23 | 21 | 134.9 | 1.7 | 1.26 | 3.10 |  |
| XS-30-3     | Xiangshan  | Ehuling        | Unavailable | Unavailable | Rhyodacite                          | 8  | 7  | 134.8 | 1.7 | 1.26 | 1.70 |  |
| RYT03       | Ruyiting   | Daguding       | Unavailable | Unavailable | Ignimbrite                          | 15 | 15 | 137.3 | 0.9 | 0.66 | 1.70 |  |
| RYT04       | Ruyiting   | Daguding       | Unavailable | Unavailable | Rhyolitic tuff                      | 14 | 14 | 136.8 | 2.5 | 1.83 | 9.40 |  |
| RYT05       | Ruyiting   | Daguding       | Unavailable | Unavailable | Rhyolitic tuff                      | 20 | 20 | 136.4 | 1.5 | 1.10 | 4.60 |  |
| RYT06       | Ruyiting   | Ehuling        | Unavailable | Unavailable | Dacitic<br>Basaltic<br>Mortary lava | 15 | 15 | 135.0 | 2.0 | 1.48 | 5.90 |  |
| RYT07       | Ruyiting   | Ehuling        | Unavailable | Unavailable | Mortary lava                        | 23 | 23 | 134.1 | 1.6 | 1.19 | 7.60 |  |
| RYT501      | Ruyiting   | Shuangfengling | Unavailable | Unavailable | Ignimbrite                          | 23 | 13 | 137.5 | 1.4 | 1.02 | 0.73 |  |
| RYT503      | Ruyiting   | Shuangfengling | Unavailable | Unavailable | Ignimbrite                          | 13 | 13 | 136.4 | 1.1 | 0.81 | 0.49 |  |
| RYT504      | Ruyiting   | Ehuling        | Unavailable | Unavailable | Mortary lava                        | 13 | 13 | 135.4 | 1.5 | 1.11 | 1.30 |  |
| RYT582      | Ruyiting   | Shuangfengling | Unavailable | Unavailable | Dacite                              | 14 | 14 | 137.4 | 1.1 | 0.80 | 1.30 |  |
| LJL112      | Lijialing  | Shuangfengling | Unavailable | Unavailable | Dacite                              | 13 | 12 | 137.4 | 1.4 | 1.02 | 2.50 |  |
| YJ201       | Yunji      | Ehuling        | Unavailable | Unavailable | Mortary lava                        | 14 | 12 | 135.2 | 1.2 | 0.89 | 0.25 |  |
| D0026       | Youfang    | Daguding       | Unavailable | Unavailable | Ignimbrite                          | 30 | 24 | 138.2 | 1.6 | 1.16 | 1.80 |  |
| D0839       | Xiangshan  | Daguding       | Unavailable | Unavailable | Ignimbrite                          | 20 | 17 | 140.1 | 1.8 | 1.28 | 3.10 |  |
| D0001-1     | Ruyiting   | Daguding       | Unavailable | Unavailable | Ignimbrite                          | 41 | 14 | 140.7 | 2.7 | 1.92 | 3.30 |  |
| D0004-1     | Ruyiting   | Ehuling        | Unavailable | Unavailable | Ignimbrite                          | 25 | 22 | 135.6 | 1.2 | 0.88 | 1.60 |  |
| ZK26-101-2  | Niutoushan | Daguding       | Unavailable | Unavailable | Dacite                              | 14 | 14 | 135.0 | 1.8 | 1.33 | 1.16 |  |
| ZK26-101-70 | Niutoushan | Ehuling        | Unavailable | Unavailable | Mortary lava                        | 27 | 25 | 133.6 | 1.3 | 0.97 | 1.30 |  |

### M18b, southmost Jiangxi and northmost Guangdong (Wu et al., 2011a, b)



|         |             |               |             |             |                |    |    |       |     |      |      |
|---------|-------------|---------------|-------------|-------------|----------------|----|----|-------|-----|------|------|
| AY015   | Sanbaishan  | Ehuling       | 250610.0    | 1152607.0   | Trachyte       | 14 | 13 | 141.6 | 1.0 | 0.68 | 1.20 |
| DCS-110 | Dachangshan | Unavailable   | 2439'10.0   | 11522'28.1  | Trachyte       | 13 | 13 | 135.4 | 1.5 | 1.11 | 0.84 |
| BS003   | Sanmenzhai  | Unavailable   | Unavailable | Unavailable | Rhyolite       | 14 | 14 | 131.4 | 1.3 | 0.99 | 0.97 |
| BS201   | Banshi      | Ehuling       | Unavailable | Unavailable | Rhyolitic tuff | 14 | 12 | 142.5 | 1.3 | 0.91 | 1.70 |
| CF102   | Caifang     | Upper Ehuling | Unavailable | Unavailable | Rhyolite       | 14 | 14 | 130.8 | 0.7 | 0.56 | 1.30 |

M18c, southmost Jiangxi and northmost Guangdong (Wu et al., 2012)

|       |           |          |          |           |             |    |    |      |     |      |      |
|-------|-----------|----------|----------|-----------|-------------|----|----|------|-----|------|------|
| CT015 | Yousheng  | Yousheng | 243008.3 | 1150512.0 | Rhyolite    | 14 | 12 | 96.8 | 1.4 | 1.45 | 1.30 |
| RJ203 | Wutuoxi   | Yousheng | 244837.6 | 1155640.6 | Rhyolite    | 14 | 14 | 95.5 | 1.3 | 1.36 | 1.30 |
| XW003 | Zhuxia'ao | Yousheng | 245417.4 | 1154122.2 | Mortar lava | 14 | 13 | 96.7 | 1.1 | 1.14 | 0.61 |

Fujian province

L8, Golden Lake, Taining (H6 from Li et al., 2019; and the left from this work)

|    |            |           |                |          |           |              |    |    |       |     |      |      |      |
|----|------------|-----------|----------------|----------|-----------|--------------|----|----|-------|-----|------|------|------|
| H1 | 1110-01    | Dabu      | Lower Zhaixia  | 264326.8 | 1170231.7 | Trachyte     | 15 | 15 | 96.9  | 1.0 | 1.03 | 0.71 | 0.77 |
| H2 | 1110-02    | Dabu      | Middle Zhaixia | 264307.9 | 1170211.3 | Trachyte     | 15 | 15 | 97.5  | 1.0 | 1.03 | 0.64 | 0.84 |
| H3 | 1110-03    | Dabu      | Top Shaxian    | 264239.0 | 1170137.5 | Trachyte     | 15 | 15 | 97.3  | 1.0 | 0.98 | 0.59 | 0.87 |
| H4 | 1110-04    | Meikou    | Lower Zhaixia  | 264506.3 | 1170059.2 | Tuff?        | 20 | 5  | 113.7 | 3.6 | 3.17 | 2.10 | 0.06 |
| H5 | 0125-01    | Meikou    | Top Zhaixia    | 265117.1 | 1170336.4 | Dacitic tuff | 20 | 17 | 101.2 | 1.2 | 1.19 | 1.30 | 0.26 |
| H6 | 13105-03zk | Maoershan | Lower Zhaixia  | 264719.1 | 1170129.7 | Andsite      | 15 | 12 | 130.7 | 1.4 | 1.1  | 0.9  | 0.60 |

L9, Jikou-Longdong, Shaxian (I5 from Li et al., 2019; others from this work)

|    |           |              |                  |          |           |          |    |    |       |     |      |      |      |
|----|-----------|--------------|------------------|----------|-----------|----------|----|----|-------|-----|------|------|------|
| I1 | SX-04     | Longdong     | Shaxian          | 262150.4 | 1174332.5 | Tuff     | 15 | 14 | 93.3  | 1.6 | 1.71 | 0.09 | 1.00 |
| I2 | 150122-01 | Shaxian town | Shaxian          | 262440.2 | 1174621.2 | Tuff     | 19 | 13 | 94.2  | 1.1 | 1.17 | 1.02 | 0.43 |
| I3 | 13106-02  | Shxian town  | Shaxian/Zhaixia? | 262444.1 | 1174622.5 | Tuff     | 15 | 14 | 133.9 | 2.1 | 1.57 | 1.50 | 0.10 |
| I4 | 1111-01   | South Jikou  | Middle Shaxian   | 262501.0 | 1174831.3 | Tuff?    | 15 | 2  | 114.0 | 2.8 | 2.46 | 0.00 | 1.00 |
| I5 | 1110-06   | North Jikou  | Top Zhaixia      | 262616.2 | 1174833.0 | Trachyte | 15 | 12 | 99.1  | 1.5 | 1.51 | 3.50 | 0.10 |

L10, Xiadu-Jishan, Yongan

|    |         |        |              |          |           |              |    |    |       |     |      |      |      |
|----|---------|--------|--------------|----------|-----------|--------------|----|----|-------|-----|------|------|------|
| J1 | 0125-05 | Xiadu  | Bantou       | 255938.1 | 1172129.8 | Dacitic tuff | 6  | 5  | 134.4 | 2.9 | 2.16 | 1.19 | 0.26 |
|    | 0125-05 | Xiadu  | Bantou       | 255938.1 | 1172129.8 | Dacitic tuff | 13 | 11 | 155.0 | 2.4 | 1.55 | 3.90 | 0.10 |
| J2 | YA-01   | Xiadu  | Lower Xiadu  | 255914.7 | 1172126.8 | Ignimbrite   | 15 | 15 | 160.0 | 1.2 | 0.75 | 2.30 | 0.69 |
| J3 | YA-02   | Yongan | Xiadu        | 255852.3 | 1172115.8 | Trachyte     | 15 | 13 | 150.5 | 1.1 | 0.73 | 0.78 | 0.51 |
| J4 | 0125-04 | Yongan | Xiadu        | 255828.2 | 1172048.0 | Ignimbrite   | 7  | 6  | 151.2 | 1.4 | 0.93 | 0.32 | 0.90 |
|    | 0125-04 | Yongan | Xiadu        | 255828.2 | 1172048.0 | Ignimbrite   | 13 | 8  | 158.0 | 1.5 | 0.95 | 0.71 | 0.66 |
| J5 | 1112-02 | Jishan | Bantou       | 255631.3 | 1171958.8 | Trachyte     | 15 | 1  | 132.4 | 1.2 | 0.91 | 1.50 | 0.15 |
| J6 | YA-13   | Jishan | Bantou       | 255735.3 | 1172017.0 | Ignimbrite   | 20 | 20 | 127.3 | 0.6 | 0.46 | 0.62 | 0.89 |
| J7 | YA-04A  | Jishan | Lower Bantou | 255722.3 | 1171956.6 | Dacitic tuff | 15 | 12 | 132.1 | 3.1 | 2.35 | 5.3  | 0.01 |
| J8 | YA-04B  | Jishan | Bantou       | 255722.5 | 1171956.6 | Dacitic tuff | 15 | 12 | 143.2 | 1.4 | 0.98 | 0.48 | 0.91 |
| J9 | 1112-01 | Jishan | Bantou       | 255752.9 | 1172016.8 | Trachyte     | 6  | 5  | 125.4 | 2.8 | 2.23 | 2.10 | 0.10 |
|    | 1112-01 | Jishan | Bantou       | 255752.9 | 1172016.8 | Trachyte     | 9  | 7  | 134.5 | 2.8 | 2.08 | 4.70 | 0.01 |

M19, Xiamei, Wuyishan (Hu et al., 2011)

|        |        |              |          |           |      |    |    |       |     |      |      |      |
|--------|--------|--------------|----------|-----------|------|----|----|-------|-----|------|------|------|
| wys-01 | Xiamei | Top Xiadu    | 273955.5 | 1180034.9 | Tuff | 17 | 17 | 132.0 | 2.2 | 1.67 | 3.20 | 0.00 |
| wys-02 | Xiamei | Basal Bantou | 273955.5 | 1180034.9 | Tuff | 11 | 10 | 125.3 | 5.3 | 4.23 | 9.40 | 0.00 |

M20, Baiyashan, Taining (Liu et al., 2016)

|       |           |           |          |           |  |    |    |      |     |      |      |      |
|-------|-----------|-----------|----------|-----------|--|----|----|------|-----|------|------|------|
| SMS20 | Baiyashan | Baiyashan | 264209.7 | 1165716.9 |  | 11 | 10 | 99.7 | 1.3 | 1.30 | 0.51 | 0.87 |
|-------|-----------|-----------|----------|-----------|--|----|----|------|-----|------|------|------|

M21, Jishan and Xiadu, Yongan (js-jch and js-09 from Hu et al., 2011; others from Liu et al., 2016)

|          |        |              |             |             |                |    |    |       |     |      |       |      |
|----------|--------|--------------|-------------|-------------|----------------|----|----|-------|-----|------|-------|------|
| js-09-a  | Jishan | Lower Bantou | Unavailable | Unavailable | Tuff           | 29 | 27 | 148.3 | 2.9 | 1.96 | 10.40 | 0.00 |
| js-jch-a | Jishan | Lower Bantou | Unavailable | Unavailable | Tuff           | 21 | 21 | 147.7 | 4.4 | 2.98 | 17.00 | 0.00 |
| NY36     | Xiadu  | Xiadu        | 255939.2    | 1172129.7   | Crystal tuff   | 21 | 13 | 135.2 | 2.1 | 1.55 | 0.10  | 1.00 |
| NY37     | Xiadu  | Xiadu        | 255942.2    | 1172130.3   | Tuff           | 22 | 16 | 132.5 | 2.1 | 1.58 | 0.12  | 1.00 |
| NY38     | Xiadu  | Baiyashan    | 255953.9    | 1172134.0   | Lithic tuff    | 19 | 8  | 99.5  | 2.0 | 2.01 | 0.23  | 0.99 |
| NY39     | Xiadu  | Baiyashan    | 260000.5    | 1172135.5   | Rhyolitic tuff | 20 | 12 | 97.5  | 1.3 | 1.33 | 0.55  | 0.87 |

M22, Zijinshan and Shanghang, SW Fujian (Jiang et al., 2013, 2015)

|         |            |                  |                  |           |                |    |    |       |     |      |      |
|---------|------------|------------------|------------------|-----------|----------------|----|----|-------|-----|------|------|
| ZJ10-7  | Zijinshan  | Lower Zhaixia?   | 251107.9         | 1162454.8 | Dacite         | 14 | 6  | 110.0 | 1.0 | 0.91 | 0.73 |
| ZJ10-12 | Zijinshan  | Lower Zhaixia?   | Close to ZJ10-7  |           | Tuff           | 19 | 13 | 110.0 | 1.0 | 0.91 | 1.40 |
| ZJ10-16 | Jinshizhai | Upper Huangkeng  | Close to Yueyang |           | Rhyolitic tuff | 18 | 17 | 105.0 | 1.0 | 0.95 | 2.60 |
| ZJ10-21 | Jinshizhai | Upper Huangkeng  | Close to Yueyang |           | Ignimbrite     | 20 | 20 | 108.0 | 1.0 | 0.93 | 0.37 |
| ZJ10-22 | Jinshizhai | Upper Huangkeng  | Close to Yueyang |           | Rhyolite       | 20 | 18 | 102.0 | 1.0 | 0.98 | 0.93 |
| ZJ10-23 | Zijinshan  | Upper Huangkeng? | Close to ZJ10-7  |           | Ignimbrite     | 20 | 18 | 102.0 | 1.0 | 0.98 | 0.93 |
| SH12-1  | Yueyang    | Upper Zhaixia    | 251001.7         | 1162054.7 | Rhyolite       | 19 | 10 | 99.0  | 1.0 | 1.01 | 0.41 |
| SH12-2  | Yueyang    | Lower Zhaixia    | 251004.3         | 1162135.6 | Rhyolite       | 20 | 7  | 101.0 | 1.0 | 0.99 | 1.19 |
| SH12-3  | Yueyang    | Lower Zhaixia    | 251028.6         | 1162129.4 | Tuff           | 20 | 7  | 103.0 | 1.0 | 0.97 | 1.00 |
| SH12-4  | Yueyang    | Lower Zhaixia    | 251027.1         | 1162130.5 | Tuff           | 20 | 11 | 103.0 | 1.0 | 0.97 | 1.70 |
| SH12-6  | Yueyang    | Lower Zhaixia    | 251114.7         | 1162041.1 | Tuff           | 20 | 14 | 102.0 | 1.0 | 0.98 | 1.12 |
| SH12-7  | Yueyang    | Upper Huangkeng  | 251033.9         | 1162149.4 | Tuff           | 16 | 16 | 105.0 | 1.0 | 0.95 | 0.73 |
| SH12-8  | Yueyang    | Upper Huangkeng  | 251031.1         | 1162149.6 | Dacite         | 18 | 18 | 102.0 | 1.0 | 0.98 | 1.14 |
| SH12-9  | Yueyang    | Upper Huangkeng  | 25109.0          | 1162156.6 | Dacite         | 20 | 19 | 105.0 | 1.0 | 0.95 | 4.80 |
| SH12-13 | Yueyang    | Upper Zhaixia    | 250642.1         | 1162528.2 | Dacite         | 16 | 13 | 100.0 | 1.0 | 1.00 | 0.30 |



|                                                                                 |            |                   |             |             |                |    |    |       |     |      |      |      |
|---------------------------------------------------------------------------------|------------|-------------------|-------------|-------------|----------------|----|----|-------|-----|------|------|------|
| SH12-14                                                                         | Yueyang    | Upper Zhaixia     | 250644.0    | 1162529.2   | Dacite         | 19 | 15 | 100.0 | 1.0 | 1.00 | 0.44 |      |
| N8, Shouning (Duan et al., 2013)                                                |            |                   |             |             |                |    |    |       |     |      |      |      |
| 117SN-3-1                                                                       | Xixi       | Lower Nanyuan     | Unavaiaable | Unavaiaable | Rhyolitic tuff | 27 | 24 | 143.3 | 1.6 | 1.12 | 0.24 | 1.00 |
| 117SN-1-1                                                                       | Xixi       | Upper Xiaoxi      | Unavaiaable | Unavaiaable | Rhyolitic tuff | 25 | 20 | 126.2 | 1.4 | 1.11 | 0.54 | 0.94 |
| N9, Zhenghe (117ZH-2-1 from Duan et al., 2013; author one from Li et al., 2015) |            |                   |             |             |                |    |    |       |     |      |      |      |
| 117ZH-2-1                                                                       | Zhenqian   | Upper Nanyuan     | Unavaiaable | Unavaiaable | Mortary lava   | 25 | 25 | 140.1 | 1.6 | 1.14 | 0.35 | 1.00 |
| ZK701                                                                           | Tieshan    | Nanyuan           | Unavaiaable | Unavaiaable | Rhyolitic tuff | 21 | 21 | 173.6 | 0.8 | 0.46 | 0.77 | 0.75 |
| N10, Fuan (Li et al., 2009)                                                     |            |                   |             |             |                |    |    |       |     |      |      |      |
| T204-9400                                                                       | Shekou     | Basal Shekou      | Unavaiaable | Unavaiaable | Andesite       | 17 | 14 | 158.2 | 6.2 | 3.92 | 2.80 | 0.00 |
| T204-9401                                                                       | Shekou     | Top Shekou        | Unavaiaable | Unavaiaable | Ignimbrite     | 17 | 10 | 147.3 | 3.9 | 2.65 | 0.60 | 0.80 |
| N11, Zherong (Liu et al., 2016)                                                 |            |                   |             |             |                |    |    |       |     |      |      |      |
| NY03                                                                            | Xianyuanli | Basal Xiaoxi      | 271523.9    | 1195459.5   | Tuff           | 18 | 18 | 129.7 | 1.4 | 1.08 | 0.25 | 1.00 |
| NY04                                                                            | Xianyuanli | Lower Xiaoxi      | 271540.5    | 1195457.3   | Tuff           | 13 | 13 | 128.5 | 1.1 | 0.86 | 0.62 | 0.83 |
| NY05                                                                            | Xianyuanli | Lower Xiaoxi      | 271618.8    | 1195526.7   | Tuff           | 16 | 12 | 130.3 | 2.2 | 1.69 | 0.14 | 1.00 |
| NY08                                                                            | Xianyuanli | Middle Xiaoxi     | 271621.1    | 1195527.2   | Ignimbrite     | 16 | 16 | 129.6 | 1.3 | 1.00 | 0.50 | 0.94 |
| NY09                                                                            | Xianyuanli | Middle Xiaoxi     | 271627.9    | 1195523.6   | Ignimbrite     | 18 | 17 | 129.8 | 1.4 | 1.08 | 0.48 | 0.96 |
| NY10                                                                            | Xianyuanli | Middle Xiaoxi     | 271643.5    | 1195538.5   | Rhyolite       | 20 | 14 | 128.1 | 1.6 | 1.25 | 0.20 | 1.00 |
| SMS01                                                                           | Xianyuanli | Upper Xiaoxi      | 271653.9    | 1195601.3   | Rhyolite       | 18 | 17 | 128.2 | 1.0 | 0.78 | 0.56 | 0.91 |
| SMS03                                                                           | Xianyuanli | Top Xiaoxi        | 271702.9    | 1195623.2   | Rhyolite       | 16 | 14 | 126.7 | 1.5 | 1.18 | 0.29 | 1.00 |
| N12, Minqing (Liu et al., 2016)                                                 |            |                   |             |             |                |    |    |       |     |      |      |      |
| NY11                                                                            | Chiyuan    | Changlin          | 260734.2    | 1184235.6   | Ignimbrite     | 20 | 20 | 138.8 | 1.2 | 0.86 | 0.14 | 1.00 |
| NY12                                                                            | Chiyuan    | Changlin          | 260713.0    | 1184222.3   | Ignimbrite     | 20 | 20 | 147.9 | 1.4 | 0.95 | 0.28 | 1.00 |
| FK01                                                                            | Chiyuan    | Changlin          | 260629.3    | 1184133.2   | Ignimbrite     | 20 | 15 | 153.3 | 2.0 | 1.30 | 0.20 | 1.00 |
| FK02                                                                            | Chiyuan    | Changlin          | 260620.8    | 1184129.1   | Tuff           | 20 | 20 | 156.6 | 1.4 | 0.89 | 0.12 | 1.00 |
| FK03                                                                            | Chiyuan    | Changlin          | 260431.5    | 1184026.6   | Tuff           | 20 | 18 | 159.5 | 1.9 | 1.19 | 0.16 | 1.00 |
| N13, Minhou (former four from Liu et al., 2016; the left from Guo et al., 2012) |            |                   |             |             |                |    |    |       |     |      |      |      |
| NY14                                                                            | Ezhai      | Middle Shimaoshan | 260657.7    | 1185600.1   | Ignimbrite     | 20 | 20 | 98.7  | 1.1 | 1.11 | 0.25 | 1.00 |
| NY15                                                                            | Ezhai      | Middle Shimaoshan | 260654.9    | 1185556.8   | Tuff           | 20 | 17 | 100.2 | 1.4 | 1.40 | 0.29 | 0.99 |
| NY16                                                                            | Ezhai      | Middle Shimaoshan | 260654.9    | 1185556.8   | Tuff           | 20 | 19 | 98.4  | 1.0 | 1.00 | 0.81 | 0.69 |
| NY17                                                                            | Ezhai      | Middle Shimaoshan | 260637.4    | 1185552.2   | Tuff           | 20 | 20 | 97.6  | 1.2 | 1.23 | 1.50 | 0.08 |
| 09GF-84A                                                                        | Dazhangshu | Top Shimaoshan    | 260622.0    | 1185425.0   | Tuff           | 16 | 16 | 98.9  | 0.8 | 0.76 | 0.38 | 0.98 |
| 09GF-96                                                                         | Dazhangshu | Shimaoshan        | 260646.0    | 1185513.0   | Rhyolite       | 24 | 18 | 100.4 | 0.8 | 0.82 | 0.36 | 0.99 |
| 09GF-103                                                                        | Dazhangshu | Shimaoshan        | 260625.0    | 1185535.0   | Rhyolite       | 24 | 22 | 99.1  | 0.8 | 0.79 | 1.03 | 0.42 |
| 09GF-104A                                                                       | Dazhangshu | Basal Shimaoshan  | 260607.0    | 1185532.0   | Rhyolite       | 16 | 16 | 97.8  | 0.8 | 0.77 | 0.69 | 0.80 |
| 09GF-108A                                                                       | Baiyanshan | Upper Shimaoshan  | 260425.5    | 1185156.8   | Tuff           | 14 | 14 | 99.3  | 0.8 | 0.84 | 0.30 | 0.99 |
| 09GF-113A                                                                       | Baiyanshan | Lower Shimaoshan  | 260459.0    | 1185124.0   | Rhyolite       | 34 | 9  | 98.8  | 2.3 | 2.33 | 0.33 | 0.97 |
| 09GF-115A                                                                       | Baiyanshan | Middle Shimaoshan | 260520.0    | 1185111.0   | Dacite         | 22 | 3  | 95.3  | 3.4 | 3.57 | 0.29 | 0.75 |
| 09GF-118A                                                                       | Baiyanshan | Shimaoshan        | 260519.0    | 1185111.0   | Rhyolite       | 24 | 21 | 96.5  | 1.0 | 1.04 | 0.63 | 0.89 |
| 09GF-126A                                                                       | Baiyanshan | Nanyuan           | 260533.0    | 1184921.0   | Dacite         | 15 | 15 | 140.6 | 1.1 | 0.78 | 0.82 | 0.65 |
| N14, Yongtai (Guo et al., 2012)                                                 |            |                   |             |             |                |    |    |       |     |      |      |      |
| 09GF-70                                                                         | Yongtai    | Shimaoshan        | 254934.0    | 1185243.0   | Dacite         | 24 | 19 | 96.8  | 1.0 | 0.99 | 0.63 | 0.88 |
| 09GF-55                                                                         | Yongtai    | Shimaoshan        | 254939.0    | 1184832.0   | Dacite         | 20 | 17 | 91.3  | 1.5 | 1.64 | 0.71 | 0.78 |
| N15, Fuqing (Liu et al., 2016)                                                  |            |                   |             |             |                |    |    |       |     |      |      |      |
| NY18                                                                            | Huangkeng  | Basal Shimaoshan  | 254155.2    | 1191220.6   | Tuff           | 19 | 19 | 111.2 | 1.1 | 0.99 | 0.12 | 1.00 |
| SMS04                                                                           | Huangkeng  | Lower Shimaoshan  | 254222.8    | 1191251.9   | Tuff           | 20 | 18 | 110.7 | 1.1 | 0.99 | 0.13 | 1.00 |
| SMS06                                                                           | Huangkeng  | Middle Shimaoshan | 254302.5    | 1191255.0   | Tuff           | 20 | 15 | 111.1 | 1.8 | 1.62 | 0.14 | 1.00 |
| SMS07                                                                           | Huangkeng  | Middle Shimaoshan | 254306.5    | 1191259.7   | Tuff           | 18 | 18 | 106.7 | 1.5 | 1.41 | 0.11 | 1.00 |
| SMS08                                                                           | Huangkeng  | Middle Shimaoshan | 254323.5    | 1191247.0   | Tuff           | 20 | 20 | 106.9 | 0.7 | 0.66 | 0.24 | 1.00 |
| SMS10                                                                           | Huangkeng  | Upper Shimaoshan  | 254351.3    | 1191234.5   | Rhyolite       | 19 | 19 | 105.4 | 0.5 | 0.48 | 0.58 | 0.92 |
| SMS11                                                                           | Huangkeng  | Upper Shimaoshan  | 254414.2    | 1191220.8   | Rhyolite       | 15 | 15 | 92.0  | 1.2 | 1.30 | 4.00 | 0.00 |
| N16, Dehua (former three from Guo et al., 2012; the left from Liu et al., 2016) |            |                   |             |             |                |    |    |       |     |      |      |      |
| 08JH-440                                                                        | Chishui    | Upper Nanyuan     | 253750.0    | 1180459.0   | Rhyolite       | 24 | 17 | 130.9 | 1.5 | 1.15 | 0.17 | 1.00 |
| 08JH-454                                                                        | Chishui    | Lower Nanyuan     | 254224.0    | 1180818.0   | Rhyolite       | 24 | 19 | 141.6 | 1.5 | 1.06 | 0.61 | 0.89 |
| 08JH-460                                                                        | Chishui    | Middle Nanyuan    | 253949.0    | 1180757.0   | Dacite         | 20 | 19 | 132.8 | 0.9 | 0.68 | 0.28 | 1.00 |
| NY23                                                                            | Chishui    | Lower Chishui     | 253917.3    | 1180751.2   | Ignimbrite     | 16 | 16 | 145.0 | 1.0 | 0.68 | 0.18 | 1.00 |
| NY25                                                                            | Chishui    | Lower Chishui     | 253917.3    | 1180751.2   | Dacite         | 18 | 18 | 143.9 | 0.9 | 0.64 | 0.44 | 0.98 |
| NY26                                                                            | Chishui    | Middle Chishui    | 253948.8    | 1180756.6   | Ignimbrite     | 16 | 16 | 143.0 | 1.0 | 0.70 | 0.32 | 0.99 |
| NY27                                                                            | Chishui    | Upper Chishui     | 254027.9    | 1180806.8   | Ignimbrite     | 18 | 17 | 141.6 | 0.8 | 0.56 | 0.62 | 0.87 |
| NY28                                                                            | Chishui    | Upper Chishui     | 254105.5    | 1180817.2   | Ignimbrite     | 20 | 20 | 142.4 | 1.3 | 0.91 | 0.35 | 1.00 |
| N17, Caixi (fomer three from Liu et al., 2016; the left from Guo et al., 2012)  |            |                   |             |             |                |    |    |       |     |      |      |      |
| SMS12                                                                           | Caixi      | Shimaoshan        | 253329.2    | 1183854.4   | Rhyolite       | 20 | 19 | 111.8 | 1.1 | 0.98 | 0.50 | 0.96 |
| SMS14                                                                           | Caixi      | Shimaoshan        | 253218.1    | 1184039.3   | Rhyolite       | 13 | 12 | 92.7  | 1.4 | 1.51 | 0.45 | 0.93 |
| 08JH-427                                                                        | Shiniushan | Nanyuan           | 253252.0    | 1182558.0   | Tuff           | 24 | 17 | 136.1 | 1.2 | 0.88 | 0.40 | 0.98 |
| 08JH-430                                                                        | Shiniushan | Lower Shimaoshan  | 253908.0    | 1182728.0   | Dacite         | 24 | 21 | 95.3  | 1.2 | 1.26 | 0.85 | 0.65 |
| 09GF-31A                                                                        | Shiniushan | Top Shimaoshan    | 253718.0    | 1182824.0   | Rhyolite       | 16 | 16 | 94.9  | 0.8 | 0.80 | 0.57 | 0.90 |



|                                                                                                                 |            |                  |             |             |            |    |    |       |     |      |      |      |
|-----------------------------------------------------------------------------------------------------------------|------------|------------------|-------------|-------------|------------|----|----|-------|-----|------|------|------|
| 09GF-38                                                                                                         | 09GF-39    | 09GF-40          | 253822.0    | 1182824.0   | Dacite     | 24 | 18 | 96.7  | 1.2 | 1.24 | 0.23 | 1.00 |
| 09GF-42                                                                                                         | 09GF-39    | 09GF-40          | 253818.0    | 1182824.0   | Dacite     | 24 | 20 | 97.3  | 1.2 | 1.23 | 0.46 | 0.98 |
| N18, Xianyou (former two from Li et al., 2009; last four from Liu et al., 2016; the left from Guo et al., 2012) |            |                  |             |             |            |    |    |       |     |      |      |      |
| T207-3706                                                                                                       | Yuanzhuang | Nanyuan          | Unavaiaable | Unavaiaable | Basalt     | 10 | 8  | 147.0 | 9.8 | 6.67 | 4.00 | 0.00 |
| T207-3710                                                                                                       | Yuanzhuang | Nanyuan          | Unavaiaable | Unavaiaable | Ignimbrite | 15 | 14 | 130.4 | 3.7 | 2.84 | 1.20 | 0.24 |
| 08JH-396                                                                                                        | Yuanzhuang | Nanyuan          | 251106.0    | 1184518.0   | Rhyolite   | 22 | 19 | 131.0 | 1.4 | 1.07 | 0.99 | 0.46 |
| 08JH-400                                                                                                        | Yuanzhuang | Nanyuan          | 251013.0    | 1184215.0   | Rhyolite   | 18 | 18 | 133.9 | 1.0 | 0.71 | 0.69 | 0.81 |
| 08JH-408                                                                                                        | Yuanzhuang | Top Nanyuan      | 251025.0    | 1184248.0   | Tuff       | 24 | 18 | 130.8 | 1.4 | 1.07 | 0.42 | 0.98 |
| 08JH-410                                                                                                        | Yuanzhuang | Middle Nanyuan   | 251105.0    | 1184326.0   | Tuff       | 24 | 15 | 133.1 | 1.8 | 1.35 | 0.32 | 0.99 |
| 08JH-415                                                                                                        | Yuanzhuang | Nanyuan          | 251118.0    | 1184326.0   | Rhyolite   | 18 | 16 | 131.4 | 1.0 | 0.76 | 0.48 | 0.95 |
| 08JH-419                                                                                                        | Yuanzhuang | Basal Nanyuan    | 251141.0    | 1184409.0   | Basalt     | 20 | 9  | 143.0 | 2.8 | 1.96 | 2.80 | 0.00 |
| 08JH-421                                                                                                        | Yuanzhuang | Lower Nanyuan    | 250836.0    | 1183943.0   | Rhyolite   | 24 | 20 | 133.8 | 1.8 | 1.35 | 1.60 | 0.67 |
| 08JH-425                                                                                                        | Yuanzhuang | Nanyuan          | 250824.0    | 1183943.0   | Rhyolite   | 24 | 17 | 135.0 | 1.5 | 1.11 | 0.97 | 0.49 |
| NY19                                                                                                            | Yuanzhuang | Basal Nanyuan    | 251207.4    | 1184346.6   | Ignimbrite | 18 | 15 | 131.3 | 2.0 | 1.52 | 0.13 | 1.00 |
| NY20                                                                                                            | Yuanzhuang | Middle Nanyuan   | 251147.9    | 1184317.8   | Ignimbrite | 18 | 15 | 130.8 | 1.9 | 1.45 | 0.67 | 0.81 |
| NY21                                                                                                            | Yuanzhuang | Middle Nanyuan   | 251149.2    | 1184301.8   | Ignimbrite | 16 | 13 | 131.4 | 1.8 | 1.37 | 0.38 | 0.97 |
| NY22                                                                                                            | Yuanzhuang | Lower Nanyuan    | 251200.2    | 1184332.4   | Ignimbrite | 18 | 16 | 130.5 | 1.7 | 1.30 | 0.56 | 0.91 |
| N19, Tongan (Guo et al., 2012)                                                                                  |            |                  |             |             |            |    |    |       |     |      |      |      |
| 08JH334                                                                                                         | Tongan     | Douling          | 244715.0    | 1175001.0   | Rhyolite   | 24 | 21 | 157.8 | 1.7 | 1.08 | 1.17 | 0.27 |
| 08JH351                                                                                                         | Tongan     | Shimaoshan       | 244542.0    | 1180621.0   | Dacite     | 24 | 10 | 93.0  | 1.8 | 1.94 | 1.09 | 0.37 |
| N20 Pinghe (Guo et al., 2012)                                                                                   |            |                  |             |             |            |    |    |       |     |      |      |      |
| 08JH229                                                                                                         | Pinghe     | Douling          | 242335.0    | 1171317.0   | Rhyolite   | 23 | 19 | 157.0 | 1.3 | 0.83 | 1.40 | 0.14 |
| 08JH239                                                                                                         | Pinghe     | Shimaoshan       | 241751.0    | 1174117.0   | Rhyolite   | 24 | 8  | 103.3 | 2.6 | 2.52 | 0.22 | 0.97 |
| 08JH439                                                                                                         | Shiniushan | Basal Shimaoshan | 241751.0    | 1174117.0   | Rhyolite   | 23 | 23 | 94.6  | 1.0 | 1.06 | 1.09 | 0.35 |
| <b>Guangdong province</b>                                                                                       |            |                  |             |             |            |    |    |       |     |      |      |      |
| N21, Fengshun, (Guo et al., 2012)                                                                               |            |                  |             |             |            |    |    |       |     |      |      |      |
| 09GF-5                                                                                                          | Fengshun   | Lower Douling    | 234940.0    | 1160726.0   | Rhyolite   | 24 | 17 | 144.8 | 1.7 | 1.17 | 1.80 | 0.02 |
| 09GF-9                                                                                                          | Fengshun   | Middle Douling   | 235118.0    | 1160635.0   | Dacite     | 24 | 18 | 143.3 | 0.9 | 0.64 | 0.68 | 0.84 |
| 09GF-14A                                                                                                        | Fengshun   | Upper Fengshun   | 235225.0    | 1160538.0   | Dacite     | 16 | 16 | 139.4 | 1.0 | 0.72 | 0.44 | 0.97 |
| 09GF-21A                                                                                                        | Fengshun   | Basal Douling    | 235750.0    | 1161139.0   | Prophyrite | 16 | 16 | 149.0 | 1.5 | 1.01 | 1.60 | 0.08 |
| 08JH153                                                                                                         | Fengshun   | Douling          | 235425.0    | 1162301.0   | Dacite     | 24 | 17 | 168.2 | 1.1 | 0.65 | 1.07 | 0.38 |
| 08JH187                                                                                                         | Fengshun   | Fengshun         | 235243.0    | 1172325.0   | Rhyolite   | 24 | 19 | 142.7 | 1.0 | 0.70 | 1.40 | 0.14 |
| 08JH212                                                                                                         | Fengshun   | Fengshun         | 240521.0    | 1170518.0   | Dacite     | 21 | 19 | 164.8 | 1.4 | 0.85 | 0.33 | 1.00 |

Notes:

- 1, in supplementary figures and tables, samples of locations / basins L1 to L10 are mainly from the combination of this work (shadowed in greenish yellow) and Li et al. (2019) in SHTZ, M1 to M12 from former work in SHTZ, and N1 to N20 from former work in CZ.
- 2, amounts of analyzed zircons.
- 3, amounts of concordant grains from all analyzed zircons.
- 4, errors of 1 $\sigma$ /age in percent
5. location numbers, main location names, and references of data



Table RD2 Details of single zircon U-Pb isotope ages of volcanic and pyroclastic rocks from this and former works in SHTZ, South China

| Ino.                                                 | Sample     | Th<br>(ppm,<br>x10 <sup>-6</sup> ) | U<br>(ppm,<br>x10 <sup>-6</sup> ) | Th/U | <sup>207</sup> Pb/<br><sup>206</sup> Pb | 1σ      | <sup>207</sup> Pb/<br><sup>235</sup> U | 1σ      | <sup>206</sup> Pb/<br><sup>238</sup> U | 1σ      | <sup>208</sup> Pb/<br><sup>232</sup> Th | 1σ      | ρ    | <sup>207</sup> Pb/<br><sup>206</sup> Pb | 1σ  | <sup>207</sup> Pb/<br><sup>235</sup> U | 1σ | <sup>206</sup> Pb/<br><sup>238</sup> U | 1σ  | <sup>208</sup> Pb/<br><sup>232</sup> Th | 1σ | <sup>2</sup> Corr |
|------------------------------------------------------|------------|------------------------------------|-----------------------------------|------|-----------------------------------------|---------|----------------------------------------|---------|----------------------------------------|---------|-----------------------------------------|---------|------|-----------------------------------------|-----|----------------------------------------|----|----------------------------------------|-----|-----------------------------------------|----|-------------------|
| 31.Zhejiang province                                 |            |                                    |                                   |      |                                         |         |                                        |         |                                        |         |                                         |         |      |                                         |     |                                        |    |                                        |     |                                         |    |                   |
| L1, Tongjia-Yanxia of Shouchang town in Jiande Basin |            |                                    |                                   |      |                                         |         |                                        |         |                                        |         |                                         |         |      |                                         |     |                                        |    |                                        |     |                                         |    |                   |
| A1                                                   | H101-02-1  | 2541                               | 1121                              | 2.27 | 0.07487                                 | 0.00123 | 0.23077                                | 0.00421 | 0.02236                                | 0.00033 | 0.00346                                 | 0.00018 | 0.52 | 1065                                    | 34  | 211                                    | 3  | 143                                    | 2.0 | 70                                      | 4  | 0.7               |
|                                                      | 1101-02-2  | 739                                | 432                               | 1.71 | 0.04678                                 | 0.00150 | 0.13852                                | 0.00453 | 0.02148                                | 0.00033 | 0.00279                                 | 0.00016 | 0.28 | 38                                      | 69  | 132                                    | 4  | 137                                    | 2.0 | 56                                      | 3  | 1.0               |
|                                                      | H101-02-3  | 756                                | 312                               | 2.42 | 0.13460                                 | 0.00692 | 0.43633                                | 0.02111 | 0.02351                                | 0.00041 | 0.00666                                 | 0.00011 | 0.59 | 2178                                    | 83  | 372                                    | 14 | 150                                    | 3.0 | 134                                     | 2  | 0.4               |
|                                                      | 1101-02-4  | 558                                | 272                               | 2.05 | 0.04641                                 | 0.00260 | 0.13593                                | 0.00755 | 0.02125                                | 0.00039 | 0.00186                                 | 0.00011 | 0.14 | 19                                      | 122 | 129                                    | 7  | 136                                    | 2.0 | 38                                      | 2  | 1.1               |
|                                                      | H101-02-5  | 548                                | 201                               | 2.73 | 0.14513                                 | 0.00340 | 0.47914                                | 0.01146 | 0.02395                                | 0.00038 | 0.00627                                 | 0.00040 | 0.36 | 2289                                    | 41  | 397                                    | 8  | 153                                    | 2.0 | 126                                     | 8  | 0.4               |
|                                                      | 1101-02-6  | 201                                | 85                                | 2.36 | 0.05058                                 | 0.00552 | 0.14774                                | 0.01607 | 0.02119                                | 0.00041 | 0.00306                                 | 0.00027 | 0.07 | 222                                     | 245 | 140                                    | 14 | 135                                    | 3.0 | 62                                      | 5  | 1.0               |
|                                                      | 1101-02-7  | 1163                               | 217                               | 5.36 | 0.04882                                 | 0.00273 | 0.13456                                | 0.00754 | 0.01999                                | 0.00033 | 0.00574                                 | 0.00085 | 0.15 | 139                                     | 127 | 128                                    | 7  | 128                                    | 2.0 | 116                                     | 17 | 1.0               |
|                                                      | H101-02-8  | 239                                | 224                               | 1.07 | 0.05290                                 | 0.00114 | 0.51557                                | 0.01180 | 0.07071                                | 0.00105 | 0.01209                                 | 0.00105 | 0.41 | 325                                     | 50  | 422                                    | 8  | 440                                    | 6.0 | 243                                     | 21 | 1.0               |
|                                                      | 1101-02-9  | 107                                | 51                                | 2.11 | 0.04816                                 | 0.00943 | 0.13555                                | 0.02644 | 0.02042                                | 0.00050 | 0.00407                                 | 0.00046 | 0.03 | 107                                     | 348 | 129                                    | 24 | 130                                    | 3.0 | 82                                      | 9  | 1.0               |
|                                                      | 1101-02-10 | 751                                | 245                               | 3.06 | 0.04330                                 | 0.00237 | 0.12615                                | 0.00690 | 0.02114                                | 0.00035 | 0.00351                                 | 0.00033 | 0.15 | -107                                    | 121 | 121                                    | 6  | 135                                    | 2.0 | 71                                      | 7  | 1.1               |
|                                                      | 1101-02-11 | 547                                | 176                               | 3.11 | 0.04560                                 | 0.00280 | 0.13765                                | 0.00846 | 0.02189                                | 0.00037 | 0.00304                                 | 0.00025 | 0.14 | -23                                     | 134 | 131                                    | 8  | 140                                    | 2.0 | 61                                      | 5  | 1.1               |
|                                                      | 1101-02-12 | 1192                               | 256                               | 4.66 | 0.04455                                 | 0.00220 | 0.13459                                | 0.00667 | 0.02191                                | 0.00036 | 0.00299                                 | 0.00024 | 0.18 | -42                                     | 106 | 128                                    | 6  | 140                                    | 2.0 | 60                                      | 5  | 1.1               |
|                                                      | 1101-02-13 | 1440                               | 374                               | 3.85 | 0.04563                                 | 0.00155 | 0.13808                                | 0.00477 | 0.02195                                | 0.00034 | 0.00315                                 | 0.00028 | 0.26 | -22                                     | 70  | 131                                    | 4  | 140                                    | 2.0 | 64                                      | 6  | 1.1               |
|                                                      | 1101-02-14 | 1547                               | 240                               | 6.43 | 0.05833                                 | 0.00215 | 0.17796                                | 0.00663 | 0.02213                                | 0.00036 | 0.00324                                 | 0.00030 | 0.24 | 542                                     | 83  | 166                                    | 6  | 141                                    | 2.0 | 65                                      | 6  | 0.8               |
|                                                      | H101-02-15 | 2955                               | 1796                              | 1.65 | 0.05018                                 | 0.00151 | 0.17161                                | 0.00517 | 0.02481                                | 0.00045 | 0.00136                                 | 0.00010 | 0.30 | 203                                     | 71  | 161                                    | 4  | 158                                    | 3.0 | 27                                      | 2  | 1.0               |
| A2                                                   | 0128-02-1  | 320                                | 73                                | 4.38 | 0.03999                                 | 0.00266 | 0.11500                                | 0.00756 | 0.02086                                | 0.00038 | 0.00558                                 | 0.00031 | 0.10 | -290                                    | 147 | 111                                    | 7  | 133                                    | 2.0 | 112                                     | 6  | 1.2               |
|                                                      | 0128-02-2  | 509                                | 135                               | 3.76 | 0.04887                                 | 0.00263 | 0.14192                                | 0.00744 | 0.02107                                | 0.00046 | 0.00151                                 | 0.00007 | 0.14 | 142                                     | 123 | 135                                    | 7  | 134                                    | 3.0 | 30                                      | 1  | 1.0               |
|                                                      | 0128-02-3  | 1639                               | 533                               | 3.07 | 0.05025                                 | 0.00128 | 0.13967                                | 0.00364 | 0.02016                                | 0.00031 | 0.00329                                 | 0.00014 | 0.33 | 207                                     | 60  | 133                                    | 3  | 129                                    | 2.0 | 66                                      | 3  | 1.0               |
|                                                      | 0128-02-4  | 1463                               | 446                               | 3.28 | 0.04799                                 | 0.00085 | 0.14130                                | 0.00263 | 0.02135                                | 0.00028 | 0.00520                                 | 0.00021 | 0.42 | 99                                      | 43  | 134                                    | 2  | 136                                    | 2.0 | 105                                     | 4  | 1.0               |
|                                                      | 0128-02-5  | 483                                | 93                                | 5.17 | 0.05006                                 | 0.00228 | 0.14078                                | 0.00626 | 0.02040                                | 0.00036 | 0.00613                                 | 0.00041 | 0.14 | 198                                     | 107 | 134                                    | 6  | 130                                    | 2.0 | 124                                     | 8  | 1.0               |
|                                                      | 0128-02-6  | 223                                | 66                                | 3.36 | 0.04889                                 | 0.00261 | 0.14265                                | 0.00746 | 0.02116                                | 0.00040 | 0.00422                                 | 0.00022 | 0.12 | 143                                     | 122 | 135                                    | 7  | 135                                    | 3.0 | 85                                      | 4  | 1.0               |
|                                                      | 0128-02-7  | 339                                | 66                                | 5.10 | 0.05030                                 | 0.00253 | 0.14495                                | 0.00714 | 0.02090                                | 0.00039 | 0.00417                                 | 0.00019 | 0.13 | 209                                     | 117 | 137                                    | 6  | 133                                    | 2.0 | 84                                      | 4  | 1.0               |
|                                                      | 0128-02-8  | 1153                               | 186                               | 6.19 | 0.04878                                 | 0.00120 | 0.13862                                | 0.00349 | 0.02061                                | 0.00030 | 0.00328                                 | 0.00011 | 0.33 | 137                                     | 59  | 132                                    | 3  | 132                                    | 2.0 | 66                                      | 2  | 1.0               |
|                                                      | 0128-02-9  | 341                                | 104                               | 3.27 | 0.04927                                 | 0.00184 | 0.14081                                | 0.00522 | 0.02072                                | 0.00034 | 0.00351                                 | 0.00014 | 0.20 | 161                                     | 88  | 134                                    | 5  | 132                                    | 2.0 | 71                                      | 3  | 1.0               |
|                                                      | 0128-02-10 | 297                                | 77                                | 3.84 | 0.05206                                 | 0.00227 | 0.15303                                | 0.00653 | 0.02132                                | 0.00037 | 0.00616                                 | 0.00038 | 0.15 | 288                                     | 102 | 145                                    | 6  | 136                                    | 2.0 | 124                                     | 8  | 0.9               |
|                                                      | 0128-02-11 | 407                                | 69                                | 5.92 | 0.05102                                 | 0.00234 | 0.14356                                | 0.00649 | 0.02041                                | 0.00037 | 0.00295                                 | 0.00012 | 0.16 | 242                                     | 108 | 136                                    | 6  | 130                                    | 2.0 | 60                                      | 2  | 1.0               |
|                                                      | 0128-02-12 | 445                                | 133                               | 3.36 | 0.04322                                 | 0.00302 | 0.11799                                | 0.00801 | 0.01981                                | 0.00048 | 0.00158                                 | 0.00011 | 0.10 | -111                                    | 147 | 113                                    | 7  | 126                                    | 3.0 | 32                                      | 2  | 1.1               |
|                                                      | 0128-02-13 | 349                                | 89                                | 3.94 | 0.05208                                 | 0.00186 | 0.14702                                | 0.00518 | 0.02047                                | 0.00032 | 0.00523                                 | 0.00028 | 0.19 | 289                                     | 84  | 139                                    | 5  | 131                                    | 2.0 | 105                                     | 6  | 0.9               |
|                                                      | 0128-02-14 | 634                                | 174                               | 3.64 | 0.04810                                 | 0.00213 | 0.14003                                | 0.00609 | 0.02111                                | 0.00039 | 0.00344                                 | 0.00023 | 0.17 | 104                                     | 100 | 133                                    | 5  | 135                                    | 2.0 | 69                                      | 5  | 1.0               |
|                                                      | 0128-02-15 | 544                                | 142                               | 3.84 | 0.04929                                 | 0.00154 | 0.13749                                | 0.00430 | 0.02023                                | 0.00031 | 0.00408                                 | 0.00021 | 0.25 | 162                                     | 74  | 131                                    | 4  | 129                                    | 2.0 | 82                                      | 4  | 1.0               |
| A3                                                   | 0128-04-1  | 140                                | 80                                | 1.74 | 0.04658                                 | 0.00265 | 0.12608                                | 0.00682 | 0.01963                                | 0.00034 | 0.00625                                 | 0.00032 | 0.38 | 28                                      | 124 | 121                                    | 6  | 125                                    | 2.0 | 126                                     | 6  | 1.0               |
|                                                      | 0128-04-2  | 238                                | 134                               | 1.78 | 0.05109                                 | 0.00206 | 0.13942                                | 0.00549 | 0.01980                                | 0.00033 | 0.00672                                 | 0.00041 | 0.15 | 245                                     | 95  | 133                                    | 5  | 126                                    | 2.0 | 135                                     | 8  | 0.9               |
|                                                      | 0128-04-3  | 546                                | 293                               | 1.86 | 0.04888                                 | 0.00108 | 0.13561                                | 0.00309 | 0.02012                                | 0.00029 | 0.00487                                 | 0.00017 | 0.36 | 142                                     | 53  | 129                                    | 3  | 128                                    | 2.0 | 98                                      | 3  | 1.0               |
|                                                      | H128-04-4  | 346                                | 259                               | 1.34 | 0.05004                                 | 0.00204 | 0.19900                                | 0.00791 | 0.02885                                | 0.00059 | 0.00176                                 | 0.00009 | 0.21 | 497                                     | 96  | 184                                    | 7  | 183                                    | 4.0 | 36                                      | 2  | 1.0               |
|                                                      | 0128-04-5  | 866                                | 501                               | 1.73 | 0.04860                                 | 0.00107 | 0.14654                                | 0.00339 | 0.02187                                | 0.00034 | 0.00257                                 | 0.00008 | 0.41 | 129                                     | 53  | 139                                    | 3  | 139                                    | 2.0 | 52                                      | 2  | 1.0               |
|                                                      | 0128-04-6  | 424                                | 161                               | 2.63 | 0.05153                                 | 0.00201 | 0.14672                                | 0.00566 | 0.02065                                | 0.00037 | 0.00398                                 | 0.00018 | 0.21 | 265                                     | 92  | 139                                    | 5  | 132                                    | 2.0 | 80                                      | 4  | 0.9               |
|                                                      | 0128-04-7  | 180                                | 114                               | 1.58 | 0.05047                                 | 0.00146 | 0.13473                                | 0.00393 | 0.01936                                | 0.00029 | 0.00337                                 | 0.00011 | 0.27 | 217                                     | 69  | 128                                    | 4  | 124                                    | 2.0 | 68                                      | 2  | 1.0               |
|                                                      | 0128-04-8  | 136                                | 71                                | 1.91 | 0.04956                                 | 0.00226 | 0.14420                                | 0.00647 | 0.02111                                | 0.00038 | 0.00463                                 | 0.00023 | 0.16 | 174                                     | 106 | 137                                    | 6  | 135                                    | 2.0 | 93                                      | 5  | 1.0               |
|                                                      | 0128-04-9  | 177                                | 76                                | 2.32 | 0.04843                                 | 0.00458 | 0.13852                                | 0.01296 | 0.02074                                | 0.00047 | 0.00357                                 | 0.00017 | 0.08 | 120                                     | 210 | 132                                    | 12 | 132                                    | 3.0 | 72                                      | 3  | 1.0               |
|                                                      | 0128-04-10 | 580                                | 202                               | 2.87 | 0.04911                                 | 0.00190 | 0.15465                                | 0.00593 | 0.02284                                | 0.00043 | 0.00207                                 | 0.00009 | 0.23 | 153                                     | 90  | 146                                    | 5  | 146                                    | 3.0 | 42                                      | 2  | 1.0               |
|                                                      | 0128-04-11 | 192                                | 121                               | 1.59 | 0.05408                                 | 0.00227 | 0.15750                                | 0.00649 | 0.02112                                | 0.00041 | 0.00239                                 | 0.00012 | 0.20 | 374                                     | 97  | 149                                    | 6  | 135                                    | 3.0 | 48                                      | 2  | 0.9               |
|                                                      | 0128-04-12 | 606                                | 188                               | 3.23 | 0.04929                                 | 0.00208 | 0.14445                                | 0.00601 | 0.02126                                | 0.00042 | 0.00166                                 | 0.00008 | 0.21 | 162                                     | 98  | 137                                    | 5  | 136                                    | 3.0 | 34                                      | 2  | 1.0               |
|                                                      | 0128-04-13 | 300                                | 189                               | 1.59 | 0.05100                                 | 0.00349 | 0.12999                                | 0.00852 | 0.01850                                | 0.00051 | 0.00097                                 | 0.00009 | 0.10 | 241                                     | 157 | 124                                    | 8  | 118                                    | 3.0 | 20                                      | 2  | 1.0               |
|                                                      | 0128-04-14 | 365                                | 154                               | 2.37 | 0.04961                                 | 0.00164 | 0.14369                                | 0.00471 | 0.02101                                | 0.00033 | 0.00567                                 | 0.000   |      |                                         |     |                                        |    |                                        |     |                                         |    |                   |



|    |          |      |     |      |         |         |         |         |         |         |         |         |      |      |     |     |    |     |      |     |    |     |
|----|----------|------|-----|------|---------|---------|---------|---------|---------|---------|---------|---------|------|------|-----|-----|----|-----|------|-----|----|-----|
|    | ZC-06-12 | 883  | 364 | 2.42 | 0.04822 | 0.00112 | 0.13013 | 0.00307 | 0.01958 | 0.00027 | 0.00533 | 0.00026 | 0.32 | 110  | 56  | 124 | 3  | 125 | 2.0  | 107 | 5  | 1.0 |
|    | ZC-06-13 | 615  | 117 | 5.26 | 0.05554 | 0.00229 | 0.14991 | 0.00604 | 0.01958 | 0.00033 | 0.00521 | 0.00028 | 0.15 | 434  | 94  | 142 | 5  | 125 | 2.0  | 105 | 6  | 0.9 |
|    | ZC-06-14 | 379  | 129 | 2.95 | 0.04975 | 0.00230 | 0.13435 | 0.00606 | 0.01959 | 0.00034 | 0.00519 | 0.00031 | 0.13 | 183  | 108 | 128 | 5  | 125 | 2.0  | 105 | 6  | 1.0 |
|    | ZC-06-15 | 836  | 270 | 3.10 | 0.05019 | 0.00148 | 0.13541 | 0.00397 | 0.01957 | 0.00029 | 0.00540 | 0.00030 | 0.24 | 204  | 70  | 129 | 4  | 125 | 2.0  | 109 | 6  | 1.0 |
|    | ZC-06-16 | 796  | 128 | 6.22 | 0.05099 | 0.00225 | 0.13760 | 0.00594 | 0.01957 | 0.00034 | 0.00539 | 0.00032 | 0.15 | 240  | 104 | 131 | 5  | 125 | 2.0  | 109 | 6  | 1.0 |
| A6 | ZC-10-1  | 177  | 270 | 0.66 | 0.04983 | 0.00156 | 0.27484 | 0.00915 | 0.04037 | 0.00096 | 0.00565 | 0.00036 | 0.44 | 187  | 75  | 247 | 7  | 255 | 6.0  | 114 | 7  | 1.0 |
|    | ZC-10-2  | 333  | 293 | 1.14 | 0.04641 | 0.00132 | 0.13056 | 0.00393 | 0.02056 | 0.00044 | 0.00482 | 0.00021 | 0.43 | 19   | 60  | 125 | 4  | 131 | 3.0  | 97  | 4  | 1.0 |
|    | ZC-10-3  | 200  | 222 | 0.90 | 0.04607 | 0.00192 | 0.12375 | 0.00522 | 0.01974 | 0.00048 | 0.00336 | 0.00019 | 0.31 | 1    | 88  | 118 | 5  | 126 | 3.0  | 68  | 4  | 1.1 |
|    | ZC-10-4  | 221  | 238 | 0.93 | 0.04548 | 0.00157 | 0.12279 | 0.00434 | 0.01980 | 0.00044 | 0.00469 | 0.00023 | 0.35 | -30  | 72  | 118 | 4  | 126 | 3.0  | 95  | 5  | 1.1 |
|    | ZC-10-5  | 423  | 205 | 2.06 | 0.04287 | 0.00237 | 0.11449 | 0.00624 | 0.01967 | 0.00053 | 0.00347 | 0.00024 | 0.22 | -130 | 122 | 110 | 6  | 126 | 3.0  | 70  | 5  | 1.1 |
|    | ZC-10-6  | 343  | 331 | 1.03 | 0.04553 | 0.00123 | 0.11915 | 0.00334 | 0.01918 | 0.00040 | 0.00487 | 0.00022 | 0.42 | -27  | 54  | 114 | 3  | 122 | 3.0  | 98  | 4  | 1.1 |
|    | ZC-10-7  | 863  | 594 | 1.45 | 0.04699 | 0.00128 | 0.11989 | 0.00333 | 0.01864 | 0.00037 | 0.00526 | 0.00029 | 0.38 | 49   | 60  | 115 | 3  | 119 | 2.0  | 106 | 6  | 1.0 |
|    | ZC-10-8  | 323  | 283 | 1.14 | 0.04186 | 0.00158 | 0.10809 | 0.00409 | 0.01901 | 0.00043 | 0.00384 | 0.00023 | 0.30 | -185 | 88  | 104 | 4  | 121 | 3.0  | 77  | 5  | 1.2 |
|    | ZC-10-9  | 333  | 627 | 0.53 | 0.03728 | 0.00147 | 0.09719 | 0.00379 | 0.01915 | 0.00047 | 0.00288 | 0.00025 | 0.30 | -454 | 252 | 94  | 4  | 122 | 3.0  | 58  | 5  | 1.3 |
|    | ZC-10-10 | 323  | 313 | 1.03 | 0.04599 | 0.00160 | 0.10772 | 0.00372 | 0.01716 | 0.00036 | 0.00477 | 0.00029 | 0.29 | -3   | 72  | 104 | 3  | 110 | 2.0  | 96  | 6  | 1.1 |
|    | ZC-10-11 | 489  | 257 | 1.90 | 0.04130 | 0.00153 | 0.09852 | 0.00361 | 0.01748 | 0.00038 | 0.00400 | 0.00023 | 0.28 | -216 | 87  | 95  | 3  | 112 | 2.0  | 81  | 5  | 1.2 |
|    | ZC-10-12 | 119  | 151 | 0.79 | 0.04089 | 0.00208 | 0.09619 | 0.00477 | 0.01721 | 0.00040 | 0.00435 | 0.00031 | 0.18 | -239 | 115 | 93  | 4  | 110 | 3.0  | 88  | 6  | 1.2 |
|    | ZC-10-13 | 293  | 135 | 2.17 | 0.04700 | 0.00329 | 0.11411 | 0.00769 | 0.01760 | 0.00046 | 0.00507 | 0.00047 | 0.09 | 49   | 155 | 110 | 7  | 112 | 3.0  | 102 | 9  | 1.0 |
|    | ZC-10-14 | 314  | 188 | 1.67 | 0.04517 | 0.00209 | 0.10503 | 0.00468 | 0.01687 | 0.00035 | 0.00543 | 0.00039 | 0.15 | -11  | 98  | 101 | 4  | 108 | 2.0  | 109 | 8  | 1.1 |
|    | ZC-10-15 | 424  | 209 | 2.03 | 0.08331 | 0.01653 | 0.21585 | 0.03810 | 0.01841 | 0.00179 | 0.00333 | 0.00250 | 0.04 | 1276 | 428 | 198 | 32 | 118 | 11.0 | 67  | 50 | 0.6 |
| A7 | ZC-11-1  | 98   | 145 | 0.67 | 0.04572 | 0.00324 | 0.11424 | 0.00790 | 0.01813 | 0.00048 | 0.00524 | 0.00026 | 0.13 | -17  | 157 | 110 | 7  | 116 | 3.0  | 106 | 5  | 1.1 |
|    | ZC-11-2  | 247  | 337 | 0.73 | 0.04478 | 0.00240 | 0.10805 | 0.00570 | 0.01752 | 0.00042 | 0.00527 | 0.00023 | 0.19 | -31  | 116 | 104 | 5  | 112 | 3.0  | 106 | 5  | 1.1 |
|    | ZC-11-3  | 96   | 134 | 0.71 | 0.04688 | 0.00251 | 0.11492 | 0.00608 | 0.01782 | 0.00041 | 0.00520 | 0.00019 | 0.19 | 43   | 117 | 110 | 6  | 114 | 3.0  | 105 | 4  | 1.0 |
|    | ZC-11-4  | 131  | 255 | 0.51 | 0.05043 | 0.00185 | 0.13053 | 0.00482 | 0.01883 | 0.00040 | 0.00545 | 0.00018 | 0.30 | 215  | 87  | 125 | 4  | 120 | 3.0  | 110 | 4  | 1.0 |
|    | ZC-11-5  | 41   | 83  | 0.50 | 0.04985 | 0.00626 | 0.12054 | 0.01475 | 0.01771 | 0.00070 | 0.00569 | 0.00052 | 0.08 | 188  | 267 | 116 | 13 | 113 | 4.0  | 115 | 10 | 1.0 |
|    | ZC-11-6  | 72   | 125 | 0.57 | 0.04561 | 0.00273 | 0.11673 | 0.00695 | 0.01862 | 0.00044 | 0.00512 | 0.00023 | 0.19 | -23  | 131 | 112 | 6  | 119 | 3.0  | 103 | 5  | 1.1 |
|    | ZC-11-7  | 185  | 270 | 0.69 | 0.04801 | 0.00203 | 0.12363 | 0.00530 | 0.01872 | 0.00041 | 0.00512 | 0.00020 | 0.28 | 100  | 96  | 118 | 5  | 120 | 3.0  | 103 | 4  | 1.0 |
|    | ZC-11-8  | 223  | 309 | 0.72 | 0.04783 | 0.00222 | 0.12161 | 0.00573 | 0.01850 | 0.00042 | 0.00551 | 0.00025 | 0.27 | 91   | 104 | 117 | 5  | 118 | 3.0  | 111 | 5  | 1.0 |
|    | ZC-11-9  | 88   | 191 | 0.46 | 0.04936 | 0.00235 | 0.12856 | 0.00623 | 0.01893 | 0.00043 | 0.00586 | 0.00027 | 0.27 | 165  | 110 | 123 | 6  | 121 | 3.0  | 118 | 5  | 1.0 |
|    | ZC-11-10 | 40   | 101 | 0.40 | 0.05003 | 0.00434 | 0.13011 | 0.01122 | 0.01888 | 0.00057 | 0.00640 | 0.00046 | 0.16 | 196  | 198 | 124 | 10 | 121 | 4.0  | 129 | 9  | 1.0 |
|    | ZC-11-11 | 173  | 243 | 0.71 | 0.04858 | 0.00375 | 0.12535 | 0.00979 | 0.01881 | 0.00057 | 0.00532 | 0.00044 | 0.22 | 128  | 174 | 120 | 9  | 120 | 4.0  | 107 | 9  | 1.0 |
|    | ZC-11-12 | 67   | 114 | 0.58 | 0.05071 | 0.00368 | 0.13227 | 0.00974 | 0.01900 | 0.00056 | 0.00377 | 0.00022 | 0.24 | 228  | 166 | 126 | 9  | 121 | 4.0  | 76  | 4  | 1.0 |
|    | ZC-11-13 | 219  | 327 | 0.67 | 0.04867 | 0.00289 | 0.12597 | 0.00786 | 0.01878 | 0.00052 | 0.00534 | 0.00036 | 0.33 | 132  | 135 | 120 | 7  | 120 | 3.0  | 108 | 7  | 1.0 |
|    | ZC-11-14 | 57   | 132 | 0.43 | 0.05808 | 0.00877 | 0.15455 | 0.02393 | 0.01957 | 0.00106 | 0.00590 | 0.00086 | 0.24 | 533  | 340 | 146 | 21 | 125 | 7.0  | 119 | 17 | 0.9 |
|    | ZC-11-15 | 125  | 254 | 0.49 | 0.05004 | 0.00471 | 0.12727 | 0.01267 | 0.01843 | 0.00070 | 0.00498 | 0.00055 | 0.33 | 197  | 215 | 122 | 11 | 118 | 4.0  | 100 | 11 | 1.0 |
| A8 | ZC-13-01 | 313  | 81  | 3.87 | 0.05102 | 0.00264 | 0.16729 | 0.00844 | 0.02378 | 0.00045 | 0.00613 | 0.00041 | 0.12 | 242  | 121 | 157 | 7  | 152 | 3.0  | 124 | 8  | 1.0 |
|    | ZC-13-02 | 864  | 451 | 1.91 | 0.04885 | 0.00204 | 0.16194 | 0.00660 | 0.02405 | 0.00041 | 0.00681 | 0.00048 | 0.15 | 141  | 97  | 152 | 6  | 153 | 3.0  | 137 | 10 | 1.0 |
|    | ZC-13-03 | 923  | 513 | 1.80 | 0.05118 | 0.00222 | 0.16712 | 0.00704 | 0.02369 | 0.00042 | 0.00674 | 0.00050 | 0.14 | 249  | 102 | 157 | 6  | 151 | 3.0  | 136 | 10 | 1.0 |
|    | ZC-13-05 | 386  | 88  | 4.38 | 0.04908 | 0.00318 | 0.16031 | 0.01008 | 0.02370 | 0.00051 | 0.00650 | 0.00052 | 0.08 | 152  | 147 | 151 | 9  | 151 | 3.0  | 131 | 10 | 1.0 |
|    | ZC-13-06 | 1438 | 268 | 5.36 | 0.05110 | 0.00183 | 0.16788 | 0.00590 | 0.02383 | 0.00038 | 0.00663 | 0.00039 | 0.18 | 245  | 84  | 158 | 5  | 152 | 2.0  | 134 | 8  | 1.0 |
|    | ZC-13-07 | 256  | 62  | 4.10 | 0.05919 | 0.00209 | 0.52298 | 0.01805 | 0.06409 | 0.00103 | 0.01785 | 0.00109 | 0.18 | 574  | 79  | 427 | 12 | 400 | 6.0  | 358 | 22 | 0.9 |
|    | ZC-13-08 | 872  | 240 | 3.64 | 0.05035 | 0.00142 | 0.16513 | 0.00463 | 0.02379 | 0.00034 | 0.00632 | 0.00039 | 0.24 | 211  | 67  | 155 | 4  | 152 | 2.0  | 127 | 8  | 1.0 |
|    | ZC-13-09 | 555  | 145 | 3.82 | 0.05533 | 0.00203 | 0.17998 | 0.00645 | 0.02359 | 0.00038 | 0.00647 | 0.00042 | 0.17 | 426  | 84  | 168 | 6  | 150 | 2.0  | 130 | 8  | 0.9 |
|    | ZC-13-10 | 1763 | 361 | 4.89 | 0.05059 | 0.00120 | 0.16535 | 0.00395 | 0.02371 | 0.00032 | 0.00688 | 0.00045 | 0.29 | 222  | 56  | 155 | 3  | 151 | 2.0  | 139 | 9  | 1.0 |
|    | ZC-13-11 | 639  | 104 | 6.15 | 0.04908 | 0.00297 | 0.16027 | 0.00942 | 0.02369 | 0.00048 | 0.00746 | 0.00054 | 0.09 | 152  | 137 | 151 | 8  | 151 | 3.0  | 150 | 11 | 1.0 |
|    | ZC-13-12 | 781  | 216 | 3.62 | 0.05322 | 0.00178 | 0.17355 | 0.      |         |         |         |         |      |      |     |     |    |     |      |     |    |     |



|     |           |     |     |      |         |         |         |         |         |         |         |         |      |      |     |     |    |     |     |     |    |     |
|-----|-----------|-----|-----|------|---------|---------|---------|---------|---------|---------|---------|---------|------|------|-----|-----|----|-----|-----|-----|----|-----|
|     | ZC-13B-11 | 325 | 59  | 5.53 | 0.04912 | 0.01288 | 0.12934 | 0.03370 | 0.01911 | 0.00065 | 0.00584 | 0.00153 | 0.02 | 154  | 450 | 124 | 30 | 122 | 4.0 | 118 | 31 | 1.0 |
|     | ZC-13B-12 | 282 | 172 | 1.64 | 0.04829 | 0.00328 | 0.13627 | 0.00924 | 0.02047 | 0.00035 | 0.00278 | 0.00029 | 0.12 | 114  | 153 | 130 | 8  | 131 | 2.0 | 56  | 6  | 1.0 |
|     | ZC-13B-13 | 767 | 182 | 4.20 | 0.04575 | 0.00328 | 0.13187 | 0.00941 | 0.02090 | 0.00037 | 0.00238 | 0.00019 | 0.11 | -15  | 159 | 126 | 8  | 133 | 2.0 | 48  | 4  | 1.1 |
|     | ZC-13B-14 | 426 | 100 | 4.27 | 0.04859 | 0.00606 | 0.13233 | 0.01638 | 0.01975 | 0.00045 | 0.00209 | 0.00022 | 0.05 | 128  | 259 | 126 | 15 | 126 | 3.0 | 42  | 4  | 1.0 |
|     | ZC-13B-15 | 232 | 56  | 4.17 | 0.04192 | 0.01093 | 0.11645 | 0.03025 | 0.02015 | 0.00058 | 0.00396 | 0.00078 | 0.02 | -181 | 387 | 112 | 28 | 129 | 4.0 | 80  | 16 | 1.2 |
| A11 | ZC-20-1   | 418 | 155 | 2.70 | 0.04766 | 0.00203 | 0.13727 | 0.00589 | 0.02089 | 0.00032 | 0.00458 | 0.00026 | 0.20 | 82   | 95  | 131 | 5  | 133 | 2.0 | 92  | 5  | 1.0 |
|     | ZC-20-2   | 668 | 213 | 3.13 | 0.04770 | 0.00178 | 0.13557 | 0.00508 | 0.02061 | 0.00032 | 0.00343 | 0.00015 | 0.22 | 84   | 84  | 129 | 5  | 132 | 2.0 | 69  | 3  | 1.0 |
|     | ZC-20-3   | 611 | 255 | 2.39 | 0.04895 | 0.00143 | 0.13575 | 0.00406 | 0.02012 | 0.00029 | 0.00496 | 0.00031 | 0.29 | 145  | 70  | 129 | 4  | 128 | 2.0 | 100 | 6  | 1.0 |
|     | ZC-20-4   | 354 | 176 | 2.02 | 0.04896 | 0.00179 | 0.13757 | 0.00508 | 0.02039 | 0.00030 | 0.00511 | 0.00035 | 0.22 | 146  | 86  | 131 | 5  | 130 | 2.0 | 103 | 7  | 1.0 |
|     | ZC-20-5   | 502 | 233 | 2.16 | 0.04624 | 0.00135 | 0.12869 | 0.00386 | 0.02019 | 0.00029 | 0.00247 | 0.00009 | 0.29 | 10   | 60  | 123 | 3  | 129 | 2.0 | 50  | 2  | 1.0 |
|     | ZC-20-6   | 236 | 118 | 1.99 | 0.04886 | 0.00245 | 0.13477 | 0.00678 | 0.02001 | 0.00031 | 0.00517 | 0.00038 | 0.16 | 141  | 114 | 128 | 6  | 128 | 2.0 | 104 | 8  | 1.0 |
|     | ZC-20-7   | 185 | 133 | 1.39 | 0.04874 | 0.00252 | 0.13069 | 0.00676 | 0.01945 | 0.00031 | 0.00490 | 0.00037 | 0.16 | 135  | 118 | 125 | 6  | 124 | 2.0 | 99  | 7  | 1.0 |
|     | ZC-20-8   | 438 | 295 | 1.48 | 0.04827 | 0.00140 | 0.13182 | 0.00390 | 0.01981 | 0.00029 | 0.00493 | 0.00035 | 0.29 | 113  | 68  | 126 | 3  | 126 | 2.0 | 99  | 7  | 1.0 |
|     | ZC-20-9   | 506 | 238 | 2.13 | 0.04778 | 0.00159 | 0.13080 | 0.00441 | 0.01986 | 0.00029 | 0.00488 | 0.00035 | 0.25 | 88   | 75  | 125 | 4  | 127 | 2.0 | 98  | 7  | 1.0 |
|     | ZC-20-10  | 483 | 233 | 2.07 | 0.04914 | 0.00209 | 0.13162 | 0.00556 | 0.01943 | 0.00031 | 0.00497 | 0.00047 | 0.17 | 155  | 99  | 126 | 5  | 124 | 2.0 | 100 | 9  | 1.0 |
|     | ZC-20-11  | 360 | 155 | 2.33 | 0.04299 | 0.00191 | 0.12070 | 0.00540 | 0.02037 | 0.00031 | 0.00426 | 0.00029 | 0.19 | -124 | 99  | 116 | 5  | 130 | 2.0 | 86  | 6  | 1.1 |
|     | ZC-20-12  | 628 | 350 | 1.80 | 0.04918 | 0.00116 | 0.13354 | 0.00328 | 0.01970 | 0.00028 | 0.00490 | 0.00041 | 0.36 | 156  | 57  | 127 | 3  | 126 | 2.0 | 99  | 8  | 1.0 |
|     | ZC-20-13  | 500 | 200 | 2.50 | 0.04716 | 0.00228 | 0.12981 | 0.00626 | 0.01997 | 0.00034 | 0.00380 | 0.00031 | 0.17 | 57   | 106 | 124 | 6  | 127 | 2.0 | 77  | 6  | 1.0 |
|     | ZC-20-14  | 566 | 235 | 2.41 | 0.04803 | 0.00168 | 0.13081 | 0.00459 | 0.01976 | 0.00030 | 0.00487 | 0.00043 | 0.22 | 101  | 80  | 125 | 4  | 126 | 2.0 | 98  | 9  | 1.0 |
|     | ZC-20-15  | 563 | 257 | 2.19 | 0.04808 | 0.00149 | 0.13145 | 0.00415 | 0.01983 | 0.00029 | 0.00458 | 0.00038 | 0.27 | 103  | 72  | 125 | 4  | 127 | 2.0 | 92  | 8  | 1.0 |
| A12 | ZC-23-01  | 524 | 274 | 1.91 | 0.04765 | 0.00147 | 0.12688 | 0.00388 | 0.01931 | 0.00028 | 0.00563 | 0.00035 | 0.22 | 82   | 70  | 121 | 3  | 123 | 2.0 | 113 | 7  | 1.0 |
|     | ZC-23-02  | 455 | 260 | 1.75 | 0.04814 | 0.00193 | 0.12789 | 0.00502 | 0.01927 | 0.00032 | 0.00561 | 0.00038 | 0.16 | 106  | 91  | 122 | 5  | 123 | 2.0 | 113 | 8  | 1.0 |
|     | ZC-23-03  | 319 | 168 | 1.90 | 0.04707 | 0.00199 | 0.12566 | 0.00522 | 0.01936 | 0.00032 | 0.00569 | 0.00039 | 0.15 | 53   | 92  | 120 | 5  | 124 | 2.0 | 115 | 8  | 1.0 |
|     | ZC-23-04  | 331 | 165 | 2.00 | 0.04732 | 0.00196 | 0.12650 | 0.00515 | 0.01939 | 0.00032 | 0.00560 | 0.00039 | 0.16 | 65   | 92  | 121 | 5  | 124 | 2.0 | 113 | 8  | 1.0 |
|     | ZC-23-05  | 333 | 175 | 1.91 | 0.05034 | 0.00198 | 0.13405 | 0.00518 | 0.01932 | 0.00032 | 0.00570 | 0.00041 | 0.17 | 211  | 93  | 128 | 5  | 123 | 2.0 | 115 | 8  | 1.0 |
|     | ZC-23-06  | 385 | 221 | 1.74 | 0.05010 | 0.00210 | 0.13458 | 0.00550 | 0.01948 | 0.00033 | 0.00546 | 0.00041 | 0.14 | 200  | 99  | 128 | 5  | 124 | 2.0 | 110 | 8  | 1.0 |
|     | ZC-23-07  | 290 | 165 | 1.76 | 0.04901 | 0.00207 | 0.13172 | 0.00543 | 0.01949 | 0.00033 | 0.00546 | 0.00042 | 0.14 | 148  | 98  | 126 | 5  | 124 | 2.0 | 110 | 8  | 1.0 |
|     | ZC-23-08  | 475 | 253 | 1.88 | 0.04932 | 0.00167 | 0.13251 | 0.00443 | 0.01949 | 0.00030 | 0.00537 | 0.00041 | 0.20 | 163  | 81  | 126 | 4  | 124 | 2.0 | 108 | 8  | 1.0 |
|     | ZC-23-09  | 609 | 328 | 1.85 | 0.04840 | 0.00146 | 0.12964 | 0.00388 | 0.01943 | 0.00029 | 0.00506 | 0.00039 | 0.23 | 119  | 71  | 124 | 3  | 124 | 2.0 | 102 | 8  | 1.0 |
|     | ZC-23-10  | 517 | 282 | 1.83 | 0.04622 | 0.00156 | 0.12353 | 0.00413 | 0.01939 | 0.00030 | 0.00490 | 0.00040 | 0.21 | 9    | 70  | 118 | 4  | 124 | 2.0 | 99  | 8  | 1.1 |
|     | ZC-23-11  | 275 | 146 | 1.88 | 0.05038 | 0.00220 | 0.13464 | 0.00572 | 0.01938 | 0.00033 | 0.00575 | 0.00036 | 0.13 | 213  | 103 | 128 | 5  | 124 | 2.0 | 116 | 7  | 1.0 |
|     | ZC-23-12  | 434 | 227 | 1.91 | 0.05086 | 0.00161 | 0.13602 | 0.00424 | 0.01940 | 0.00029 | 0.00526 | 0.00030 | 0.21 | 234  | 75  | 129 | 4  | 124 | 2.0 | 106 | 6  | 1.0 |
|     | ZC-23-13  | 534 | 312 | 1.71 | 0.05050 | 0.00147 | 0.13461 | 0.00388 | 0.01933 | 0.00028 | 0.00534 | 0.00030 | 0.23 | 218  | 69  | 128 | 3  | 123 | 2.0 | 108 | 6  | 1.0 |
|     | ZC-23-14  | 299 | 114 | 2.62 | 0.04985 | 0.00436 | 0.13223 | 0.01126 | 0.01924 | 0.00039 | 0.00608 | 0.00022 | 0.38 | 188  | 199 | 126 | 10 | 123 | 2.0 | 122 | 4  | 1.0 |
|     | ZC-23-15  | 411 | 197 | 2.09 | 0.04818 | 0.00170 | 0.13158 | 0.00458 | 0.01981 | 0.00031 | 0.00559 | 0.00033 | 0.19 | 108  | 82  | 126 | 4  | 126 | 2.0 | 113 | 7  | 1.0 |
| A13 | ZC-43-01  | 197 | 68  | 2.90 | 0.08904 | 0.01343 | 0.22239 | 0.03266 | 0.01811 | 0.00063 | 0.00535 | 0.00021 | 0.37 | 1405 | 308 | 204 | 27 | 116 | 4.0 | 108 | 4  | 0.6 |
|     | ZC-43-02  | 192 | 72  | 2.69 | 0.12254 | 0.01757 | 0.28793 | 0.03915 | 0.01704 | 0.00077 | 0.00487 | 0.00024 | 0.28 | 1994 | 269 | 257 | 31 | 109 | 5.0 | 98  | 5  | 0.4 |
|     | ZC-43-03  | 254 | 94  | 2.71 | 0.06610 | 0.00390 | 0.17089 | 0.00966 | 0.01875 | 0.00042 | 0.00560 | 0.00041 | 0.09 | 810  | 127 | 160 | 8  | 120 | 3.0 | 113 | 8  | 0.8 |
|     | ZC-43-04  | 123 | 59  | 2.10 | 0.09042 | 0.01529 | 0.21868 | 0.03576 | 0.01754 | 0.00076 | 0.00518 | 0.00026 | 0.24 | 1434 | 348 | 201 | 30 | 112 | 5.0 | 104 | 5  | 0.6 |
|     | ZC-43-05  | 70  | 35  | 2.01 | 0.06620 | 0.00715 | 0.17345 | 0.01802 | 0.01900 | 0.00063 | 0.00534 | 0.00065 | 0.03 | 813  | 236 | 162 | 16 | 121 | 4.0 | 108 | 13 | 0.7 |
|     | ZC-43-06  | 371 | 109 | 3.42 | 0.13734 | 0.01835 | 0.30743 | 0.03950 | 0.01623 | 0.00059 | 0.00459 | 0.00019 | 0.47 | 2194 | 244 | 272 | 31 | 104 | 4.0 | 93  | 4  | 0.4 |
|     | ZC-43-07  | 392 | 209 | 1.87 | 0.06178 | 0.00214 | 0.16105 | 0.00544 | 0.01891 | 0.00031 | 0.00543 | 0.00038 | 0.19 | 667  | 76  | 152 | 5  | 121 | 2.0 | 109 | 8  | 0.8 |
|     | ZC-43-08  | 40  | 18  | 2.18 | 0.07624 | 0.01399 | 0.19701 | 0.03480 | 0.01874 | 0.00098 | 0.00617 | 0.00107 | 0.01 | 1101 | 401 | 183 | 30 | 120 | 6.0 | 124 | 21 | 0.7 |
|     | ZC-43-09  | 134 | 64  | 2.08 | 0.05276 | 0.00337 | 0.13769 | 0.00856 | 0.01893 | 0.00038 | 0.00536 | 0.00044 | 0.08 | 318  | 148 | 131 | 8  | 121 | 2.0 | 108 | 9  | 0.9 |
|     | ZC-43-10  | 340 | 144 | 2.37 | 0.04813 | 0.00196 | 0.12767 | 0.00509 | 0.01924 | 0.00031 | 0.00485 | 0.00036 | 0.15 | 106  |     |     |    |     |     |     |    |     |



|          |     |     |      |         |         |         |         |         |         |         |         |      |      |     |     |    |     |     |     |    |     |
|----------|-----|-----|------|---------|---------|---------|---------|---------|---------|---------|---------|------|------|-----|-----|----|-----|-----|-----|----|-----|
| ZC-29-9  | 270 | 127 | 2.13 | 0.04902 | 0.00230 | 0.14019 | 0.00659 | 0.02075 | 0.00033 | 0.00357 | 0.00020 | 0.17 | 149  | 108 | 133 | 6  | 132 | 2.0 | 72  | 4  | 1.0 |
| ZC-29-10 | 437 | 108 | 4.06 | 0.04752 | 0.00266 | 0.13030 | 0.00731 | 0.01989 | 0.00032 | 0.00464 | 0.00034 | 0.15 | 75   | 124 | 124 | 7  | 127 | 2.0 | 94  | 7  | 1.0 |
| ZC-29-11 | 289 | 112 | 2.58 | 0.04541 | 0.00254 | 0.12496 | 0.00699 | 0.01996 | 0.00032 | 0.00525 | 0.00044 | 0.14 | -33  | 121 | 120 | 6  | 127 | 2.0 | 106 | 9  | 1.1 |
| ZC-29-12 | 111 | 41  | 2.74 | 0.07563 | 0.00598 | 0.21339 | 0.01670 | 0.02047 | 0.00040 | 0.00482 | 0.00039 | 0.08 | 1085 | 164 | 196 | 14 | 131 | 3.0 | 97  | 8  | 0.7 |
| ZC-29-13 | 58  | 26  | 2.24 | 0.06826 | 0.00930 | 0.19900 | 0.02691 | 0.02115 | 0.00049 | 0.00509 | 0.00053 | 0.04 | 876  | 299 | 184 | 23 | 135 | 3.0 | 103 | 11 | 0.7 |
| ZC-29-14 | 187 | 87  | 2.16 | 0.05208 | 0.00336 | 0.14336 | 0.00920 | 0.01997 | 0.00034 | 0.00539 | 0.00063 | 0.11 | 289  | 150 | 136 | 8  | 127 | 2.0 | 109 | 13 | 0.9 |
| ZC-29-15 | 257 | 131 | 1.97 | 0.04866 | 0.00222 | 0.13833 | 0.00633 | 0.02062 | 0.00033 | 0.00364 | 0.00026 | 0.18 | 131  | 104 | 132 | 6  | 132 | 2.0 | 73  | 5  | 1.0 |

L2, Zhongdai of Jinhua Municipality in Jinhua-Quzhou Basin

|    |               |        |       |      |         |         |         |         |         |         |         |         |      |      |     |     |     |     |     |     |     |     |
|----|---------------|--------|-------|------|---------|---------|---------|---------|---------|---------|---------|---------|------|------|-----|-----|-----|-----|-----|-----|-----|-----|
| B1 | 150117-01-01  | 292.4  | 207.0 | 1.41 | 0.04885 | 0.00362 | 0.13834 | 0.00984 | 0.02053 | 0.00053 | 0.00569 | 0.00049 | 0.06 | 141  | 167 | 132 | 9   | 131 | 3.0 | 115 | 10  | 1.0 |
|    | 150117-01-02  | 390.1  | 204.3 | 1.91 | 0.15011 | 0.01173 | 0.43678 | 0.03259 | 0.02110 | 0.00049 | 0.00592 | 0.00017 | 0.54 | 2347 | 138 | 368 | 23  | 135 | 3.0 | 119 | 3   | 0.4 |
|    | 150117-01-03  | 417.2  | 296.6 | 1.41 | 0.04898 | 0.00113 | 0.13665 | 0.00306 | 0.02023 | 0.00030 | 0.00605 | 0.00021 | 0.28 | 147  | 55  | 130 | 3   | 129 | 2.0 | 122 | 4   | 1.0 |
|    | 150117-01-04  | 329.0  | 243.9 | 1.35 | 0.04958 | 0.00174 | 0.13942 | 0.00472 | 0.02039 | 0.00035 | 0.00603 | 0.00030 | 0.18 | 175  | 83  | 133 | 4   | 130 | 2.0 | 122 | 6   | 1.0 |
|    | 150117-01-05  | 846.6  | 403.9 | 2.10 | 0.05079 | 0.00158 | 0.23173 | 0.00695 | 0.03308 | 0.00057 | 0.00863 | 0.00048 | 0.22 | 231  | 74  | 212 | 6   | 210 | 4.0 | 174 | 10  | 1.0 |
|    | 150117-01-06  | 965.0  | 485.7 | 1.99 | 0.05032 | 0.00139 | 0.22839 | 0.00613 | 0.03291 | 0.00056 | 0.00801 | 0.00043 | 0.27 | 210  | 66  | 209 | 5   | 209 | 3.0 | 161 | 9   | 1.0 |
|    | 150117-01-07  | 377.2  | 293.4 | 1.29 | 0.10907 | 0.00631 | 0.33484 | 0.01797 | 0.02227 | 0.00048 | 0.00644 | 0.00015 | 0.36 | 1784 | 108 | 293 | 14  | 142 | 3.0 | 130 | 3   | 0.5 |
|    | 150117-01-08  | 491.7  | 352.9 | 1.39 | 0.04818 | 0.00170 | 0.14052 | 0.00477 | 0.02115 | 0.00038 | 0.00528 | 0.00030 | 0.19 | 108  | 82  | 134 | 4   | 135 | 2.0 | 106 | 6   | 1.0 |
|    | 150117-01-09  | 630.3  | 382.3 | 1.65 | 0.04923 | 0.00103 | 0.15137 | 0.00309 | 0.02230 | 0.00034 | 0.00627 | 0.00025 | 0.34 | 159  | 50  | 143 | 3   | 142 | 2.0 | 126 | 5   | 1.0 |
|    | 150117-01-10  | 442.1  | 277.9 | 1.59 | 0.05268 | 0.00361 | 0.14938 | 0.00976 | 0.02056 | 0.00053 | 0.00667 | 0.00085 | 0.07 | 315  | 159 | 141 | 9   | 141 | 3.0 | 134 | 17  | 0.9 |
|    | 150117-01-11  | 558.5  | 327.9 | 1.70 | 0.04605 | 0.00243 | 0.11641 | 0.00584 | 0.01834 | 0.00030 | 0.00592 | 0.00025 | 0.49 | 114  | 112 | 5   | 117 | 2.0 | 119 | 5   | 1.0 |     |
|    | 150117-01-12  | 970.6  | 436.0 | 2.23 | 0.04980 | 0.00104 | 0.21047 | 0.00430 | 0.03065 | 0.00045 | 0.00713 | 0.00028 | 0.33 | 186  | 50  | 194 | 4   | 195 | 3.0 | 144 | 6   | 1.0 |
|    | 150117-01-13  | 385.5  | 287.9 | 1.34 | 0.04821 | 0.00145 | 0.13398 | 0.00389 | 0.02015 | 0.00032 | 0.00693 | 0.00031 | 0.21 | 110  | 70  | 128 | 3   | 129 | 2.0 | 140 | 6   | 1.0 |
|    | 150117-01-14  | 451.5  | 293.3 | 1.54 | 0.04868 | 0.00452 | 0.13704 | 0.01217 | 0.02041 | 0.00064 | 0.00552 | 0.00068 | 0.04 | 132  | 210 | 130 | 11  | 130 | 4.0 | 111 | 14  | 1.0 |
|    | 150117-01-15  | 785.3  | 437.9 | 1.79 | 0.06709 | 0.00192 | 0.21778 | 0.00598 | 0.02354 | 0.00041 | 0.00650 | 0.00036 | 0.25 | 841  | 61  | 200 | 5   | 150 | 3.0 | 131 | 7   | 0.8 |
|    | 150117-01-16  | 210.3  | 188.1 | 1.12 | 0.04886 | 0.00227 | 0.14043 | 0.00627 | 0.02085 | 0.00040 | 0.00777 | 0.00052 | 0.12 | 141  | 106 | 133 | 6   | 133 | 3.0 | 156 | 10  | 1.0 |
|    | 150117-01-17  | 1208.6 | 554.7 | 2.18 | 0.05008 | 0.00098 | 0.21334 | 0.00409 | 0.03090 | 0.00045 | 0.00974 | 0.00046 | 0.35 | 199  | 47  | 196 | 3   | 196 | 3.0 | 196 | 9   | 1.0 |
|    | 150117-01-18  | 721.1  | 400.1 | 1.80 | 0.04961 | 0.00220 | 0.13817 | 0.00588 | 0.02021 | 0.00038 | 0.00697 | 0.00060 | 0.12 | 177  | 103 | 131 | 5   | 129 | 2.0 | 140 | 12  | 1.0 |
|    | 150117-01-19  | 305.6  | 226.9 | 1.35 | 0.04923 | 0.00169 | 0.14079 | 0.00464 | 0.02074 | 0.00034 | 0.00637 | 0.00038 | 0.16 | 159  | 82  | 134 | 4   | 132 | 2.0 | 128 | 8   | 1.0 |
|    | 150117-01-20  | 1005.3 | 404.9 | 2.48 | 0.05076 | 0.00231 | 0.21004 | 0.00914 | 0.03001 | 0.00059 | 0.00690 | 0.00075 | 0.12 | 230  | 107 | 194 | 8   | 191 | 4.0 | 139 | 15  | 1.0 |
| B2 | 13102-01-01   | 421    | 276   | 1.52 | 0.04899 | 0.00122 | 0.13565 | 0.00328 | 0.02009 | 0.00030 | 0.00570 | 0.00019 | 0.26 | 147  | 30  | 129 | 3   | 128 | 2.0 | 115 | 4   | 1.0 |
|    | 13102-01-02   | 3085   | 1106  | 2.79 | 0.04923 | 0.00136 | 0.14265 | 0.00380 | 0.02103 | 0.00034 | 0.00465 | 0.00024 | 0.24 | 159  | 33  | 135 | 3   | 134 | 2.0 | 94  | 5   | 1.0 |
|    | 13102-01-03   | 707    | 389   | 1.82 | 0.06019 | 0.00236 | 0.21100 | 0.00789 | 0.02544 | 0.00047 | 0.00735 | 0.00054 | 0.15 | 610  | 49  | 194 | 7   | 162 | 3.0 | 148 | 11  | 0.8 |
|    | 13102-01-04   | 478    | 311   | 1.54 | 0.04932 | 0.00286 | 0.13428 | 0.00744 | 0.01976 | 0.00044 | 0.00422 | 0.00033 | 0.08 | 163  | 87  | 128 | 7   | 126 | 3.0 | 85  | 7   | 1.0 |
|    | 13102-01-05   | 417    | 178   | 2.35 | 0.10576 | 0.01089 | 0.31053 | 0.03104 | 0.02130 | 0.00052 | 0.00618 | 0.00015 | 0.53 | 1727 | 202 | 275 | 24  | 136 | 3.0 | 125 | 3   | 0.5 |
|    | 13102-01-06   | 256    | 182   | 1.40 | 0.16000 | 0.01230 | 0.48478 | 0.03489 | 0.02198 | 0.00060 | 0.00612 | 0.00020 | 0.37 | 2456 | 135 | 401 | 24  | 140 | 4.0 | 123 | 4   | 0.3 |
|    | 13102-01-07   | 317    | 239   | 1.33 | 0.04654 | 0.00727 | 0.13357 | 0.01999 | 0.02083 | 0.00097 | 0.00930 | 0.00213 | 0.01 | 26   | 223 | 127 | 18  | 133 | 6.0 | 187 | 43  | 1.0 |
|    | 13102-01-08   | 260    | 198   | 1.32 | 0.09207 | 0.00537 | 0.26221 | 0.01458 | 0.02066 | 0.00037 | 0.00608 | 0.00012 | 0.42 | 1469 | 117 | 236 | 12  | 132 | 2.0 | 123 | 3   | 0.6 |
|    | 13102-01-09   | 894    | 345   | 2.59 | 0.05467 | 0.00592 | 0.18264 | 0.01877 | 0.02425 | 0.00090 | 0.00827 | 0.00190 | 0.03 | 399  | 164 | 170 | 16  | 154 | 6.0 | 166 | 38  | 0.9 |
|    | 13102-01-10   | 427    | 300   | 1.42 | 0.05400 | 0.00976 | 0.14354 | 0.02559 | 0.01928 | 0.00056 | 0.00603 | 0.00050 | 0.39 | 371  | 382 | 136 | 23  | 123 | 4.0 | 121 | 10  | 0.9 |
|    | 13102-01-11   | 554    | 353   | 1.57 | 0.04888 | 0.00161 | 0.13491 | 0.00428 | 0.02002 | 0.00033 | 0.00567 | 0.00026 | 0.18 | 142  | 44  | 129 | 4   | 128 | 2.0 | 114 | 5   | 1.0 |
|    | 13102-01-12   | 490    | 319   | 1.53 | 0.04887 | 0.00174 | 0.14080 | 0.00483 | 0.02090 | 0.00035 | 0.00616 | 0.00030 | 0.16 | 142  | 49  | 134 | 4   | 133 | 2.0 | 124 | 6   | 1.0 |
|    | 13102-01-13   | 482    | 257   | 1.88 | 0.05690 | 0.00719 | 0.15802 | 0.01961 | 0.02014 | 0.00048 | 0.00626 | 0.00018 | 0.42 | 488  | 303 | 149 | 17  | 129 | 3.0 | 126 | 4   | 0.9 |
|    | 13102-01-14   | 1395   | 1364  | 1.02 | 0.04843 | 0.00118 | 0.13795 | 0.00326 | 0.02066 | 0.00031 | 0.00644 | 0.00038 | 0.27 | 120  | 29  | 131 | 3   | 132 | 2.0 | 130 | 8   | 1.0 |
|    | 13102-01-15   | 2547   | 1050  | 2.42 | 0.05939 | 0.00149 | 0.18638 | 0.00448 | 0.02275 | 0.00035 | 0.00761 | 0.00047 | 0.25 | 581  | 27  | 174 | 4   | 145 | 2.0 | 153 | 9   | 0.8 |
|    | 13102-01-16   | 416    | 275   | 1.51 | 0.04966 | 0.00259 | 0.13223 | 0.00662 | 0.01931 | 0.00040 | 0.00590 | 0.00044 | 0.10 | 179  | 78  | 126 | 6   | 123 | 3.0 | 119 | 9   | 1.0 |
|    | 13102-01-17   | 472    | 313   | 1.51 | 0.05760 | 0.00475 | 0.15982 | 0.01284 | 0.02012 | 0.00038 | 0.00624 | 0.00012 | 0.41 | 515  | 195 | 151 | 11  | 128 | 2.0 | 126 | 2   | 0.8 |
|    | 13102-01-18   | 437    | 287   | 1.53 | 0.04865 | 0.00370 | 0.13183 | 0.00958 | 0.01964 | 0.00051 | 0.00588 | 0.00074 | 0.05 | 131  | 115 | 126 | 9   | 125 | 3.0 | 118 | 15  | 1.0 |
|    | 13102-01-19   | 764    | 335   | 2.28 | 0.08349 | 0.00419 | 0.29013 | 0.01367 | 0.02522 | 0.00058 | 0.00843 | 0.00089 | 0.11 | 1281 | 56  | 259 | 11  | 161 | 4.0 | 170 | 18  | 0.6 |
|    | 13102-01-20   | 1343   | 593   | 2.27 | 0.04920 | 0.00359 | 0.15556 | 0.01099 | 0.02294 | 0.00062 | 0.00658 | 0.00114 | 0.10 | 157  | 110 | 147 | 10  | 146 | 4.0 | 133 | 23  | 1.0 |
| B3 | 13102-02zk-01 | 537.6  | 232.7 | 2.31 | 0.04920 | 0.00421 | 0.13754 | 0.01172 | 0.02027 | 0.00037 | 0.00645 | 0.00140 | 0.01 | 157  | 157 | 131 | 10  | 129 | 2.0 | 130 | 28  | 1.0 |
|    | 13102-02zk-02 | 466.8  | 165.0 | 2.83 | 0.04826 | 0.00561 | 0.13210 | 0.01530 | 0.01985 | 0.00039 | 0.00689 | 0.00161 | 0.01 | 112  | 219 | 126 | 14  | 127 | 2.0 | 139 | 32  | 1.0 |
|    | 13102-02zk-03 | 526.6  | 165.6 | 3.18 | 0.04904 | 0.00800 | 0.14083 | 0.02279 | 0.02084 | 0.00056 | 0.01211 | 0.00526 | 0.01 | 150  | 279 | 134 | 20  | 133 | 4.0 | 243 | 105 | 1.0 |
|    | 13102-02zk-04 | 320.1  | 75.2  | 4.25 | 0.06268 | 0.01081 | 0.18516 | 0.03170 | 0.02143 | 0.00057 | 0.00824 | 0.00206 | 0.01 | 697  | 332 | 172 | 27  | 137 | 4.0 | 166 | 41  | 0.8 |
|    | 13102-02zk-05 | 460.1  | 115.5 | 3.98 | 0.05110 | 0.01294 | 0.13967 | 0.03508 | 0.01983 | 0.00074 | 0.00855 | 0.00348 | 0.01 | 245  | 404 | 133 | 31  | 127 | 5.0 | 172 | 70  | 1.0 |
|    | 13102-02zk-06 | 395.9  | 159.6 | 2.48 | 0.04948 | 0.00749 | 0.14626 | 0.02198 | 0.02144 | 0.00056 | 0.00394 | 0.00069 | 0.01 | 171  | 270 | 139 | 19  | 137 | 4.0 | 79  | 14  | 1.0 |
|    | 13102-02zk-07 | 1022.5 | 302.4 | 3.38 | 0.04846 | 0.00363 | 0.14858 | 0.01111 | 0.02224 | 0.00043 | 0.00634 | 0.00127 | 0.01 | 122  | 131 | 141 | 10  | 142 | 3.0 | 128 | 26  | 1.0 |
|    | 13102-02zk-08 | 845.5  | 288.5 | 2.93 | 0.04868 | 0.00305 | 0.14284 | 0.00897 | 0.02129 | 0.00035 | 0.00890 | 0.00247 | 0.01 | 132  | 110 | 136 | 8   | 136 | 2.0 | 179 | 49  | 1.0 |
|    | 13102-02zk-09 | 1869.1 | 364.8 | 5.12 | 0.04897 | 0.00241 | 0.14090 | 0.00700 | 0.02087 | 0.00034 | 0.00470 | 0.00079 | 0.01 | 146  | 84  | 134 | 6   | 133 | 2.0 | 95  | 16  | 1.0 |
|    | 13102-02zk-10 | 230.5  | 71.6  | 3.22 | 0.04884 | 0.01943 | 0.13535 | 0.05352 | 0.02010 | 0.00095 | 0.00612 | 0.00236 | 0.01 | 140  | 598 | 129 | 48  | 128 | 6.0 | 123 | 47  | 1.0 |
|    | 13102-02zk-11 | 1347.7 | 177.5 | 7.59 | 0.04936 | 0.00588 | 0.13770 | 0.01630 | 0.02023 | 0.00044 | 0.00766 | 0.00237 | 0.01 | 165  | 222 | 131 | 15  | 129 | 3.0 | 154 | 48  | 1.0 |
|    | 13102-02zk-12 | 493.4  | 130.1 | 7.79 | 0.04834 | 0.00687 | 0.13810 | 0.01954 | 0.02072 | 0.00045 | 0.00923 | 0.00330 | 0.01 | 116  | 253 | 131 | 17  | 132 | 3.0 | 186 | 66  | 1.0 |
|    | 13102-02zk-13 | 1438.2 | 234.9 | 6.12 | 0.04937 | 0.00    |         |         |         |         |         |         |      |      |     |     |     |     |     |     |     |     |



|    |               |         |       |       |         |         |         |         |         |         |         |         |      |      |     |      |    |      |      |      |     |     |
|----|---------------|---------|-------|-------|---------|---------|---------|---------|---------|---------|---------|---------|------|------|-----|------|----|------|------|------|-----|-----|
| B5 | 13102-04zk-01 | 310.1   | 84.7  | 3.66  | 0.06641 | 0.01528 | 0.21319 | 0.04859 | 0.02329 | 0.00086 | 0.00557 | 0.00115 | 0.01 | 819  | 434 | 196  | 41 | 148  | 5.0  | 112  | 23  | 0.8 |
|    | 13102-04zk-02 | 61444.0 | ##### | 14.38 | 0.04962 | 0.00113 | 0.13679 | 0.00331 | 0.01999 | 0.00029 | 0.00498 | 0.00114 | 0.01 | 177  | 31  | 130  | 3  | 128  | 2.0  | 100  | 23  | 1.0 |
|    | 13102-04zk-03 | 24442.7 | ##### | 11.22 | 0.04855 | 0.00133 | 0.14907 | 0.00428 | 0.02228 | 0.00035 | 0.00535 | 0.00121 | 0.01 | 126  | 39  | 141  | 4  | 142  | 2.0  | 108  | 24  | 1.0 |
|    | 13102-04zk-04 | 61483.6 | ##### | 12.17 | 0.05019 | 0.00103 | 0.13426 | 0.00303 | 0.01940 | 0.00029 | 0.00423 | 0.00078 | 0.01 | 204  | 27  | 128  | 3  | 124  | 2.0  | 85   | 16  | 1.0 |
|    | 13102-04zk-05 | 98576.4 | ##### | 12.33 | 0.04844 | 0.00141 | 0.12168 | 0.00370 | 0.01823 | 0.00031 | 0.00343 | 0.00072 | 0.01 | 121  | 41  | 117  | 3  | 116  | 2.0  | 69   | 15  | 1.0 |
|    | 13102-04zk-06 | 58790.4 | ##### | 14.60 | 0.05028 | 0.00123 | 0.13976 | 0.00365 | 0.02016 | 0.00032 | 0.00398 | 0.00082 | 0.01 | 208  | 33  | 133  | 3  | 129  | 2.0  | 80   | 17  | 1.0 |
|    | 13102-04zk-07 | 387.6   | 148.6 | 2.61  | 0.11230 | 0.00256 | 4.01102 | 0.09831 | 0.25904 | 0.00400 | 0.06110 | 0.01275 | 0.01 | 1837 | 23  | 1636 | 20 | 1485 | 20.0 | 1199 | 243 | 0.9 |
|    | 13102-04zk-08 | 2749.5  | 872.1 | 3.15  | 0.04856 | 0.00177 | 0.14571 | 0.00541 | 0.02177 | 0.00035 | 0.00554 | 0.00140 | 0.01 | 127  | 57  | 138  | 5  | 139  | 2.0  | 112  | 28  | 1.0 |
|    | 13102-04zk-09 | 3259.6  | ##### | 3.06  | 0.04896 | 0.00166 | 0.14250 | 0.00495 | 0.02111 | 0.00033 | 0.00560 | 0.00147 | 0.01 | 146  | 52  | 135  | 4  | 135  | 2.0  | 113  | 30  | 1.0 |
|    | 13102-04zk-10 | 1231.3  | 400.5 | 3.07  | 0.04838 | 0.00574 | 0.14732 | 0.01736 | 0.02211 | 0.00064 | 0.00413 | 0.00213 | 0.01 | 118  | 209 | 140  | 15 | 141  | 4.0  | 83   | 43  | 1.0 |
|    | 13102-04-11   | 69584.2 | ##### | 15.88 | 0.04828 | 0.00109 | 0.13123 | 0.00320 | 0.01971 | 0.00031 | 0.00485 | 0.00104 | 0.01 | 113  | 30  | 125  | 3  | 126  | 2.0  | 98   | 21  | 1.0 |
|    | 13102-04-12   | 45484.7 | ##### | 18.01 | 0.04914 | 0.00105 | 0.15232 | 0.00354 | 0.02248 | 0.00034 | 0.00466 | 0.00090 | 0.01 | 155  | 28  | 144  | 3  | 143  | 2.0  | 94   | 18  | 1.0 |
|    | 13102-04-13   | 44573.7 | ##### | 19.46 | 0.04949 | 0.00158 | 0.15779 | 0.00520 | 0.02313 | 0.00040 | 0.00362 | 0.00073 | 0.01 | 171  | 45  | 149  | 5  | 147  | 3.0  | 73   | 15  | 1.0 |
|    | 13102-04-14   | 60500.4 | ##### | 15.23 | 0.04877 | 0.00150 | 0.14054 | 0.00450 | 0.02091 | 0.00037 | 0.00339 | 0.00074 | 0.01 | 137  | 43  | 134  | 4  | 133  | 2.0  | 68   | 15  | 1.0 |
|    | 13102-04-15   | 51277.7 | ##### | 14.04 | 0.04853 | 0.00116 | 0.13939 | 0.00357 | 0.02083 | 0.00032 | 0.00518 | 0.00134 | 0.01 | 125  | 33  | 133  | 3  | 133  | 2.0  | 104  | 27  | 1.0 |
|    | 13102-04-16   | 98552.0 | ##### | 17.46 | 0.04893 | 0.00168 | 0.12934 | 0.00460 | 0.01917 | 0.00036 | 0.00180 | 0.00030 | 0.01 | 144  | 49  | 124  | 4  | 122  | 2.0  | 36   | 6   | 1.0 |
|    | 13102-04-17   | 11015.8 | ##### | 5.79  | 0.04824 | 0.00125 | 0.14609 | 0.00401 | 0.02196 | 0.00034 | 0.00640 | 0.00197 | 0.01 | 111  | 36  | 138  | 4  | 140  | 2.0  | 129  | 40  | 1.0 |
|    | 13102-04-18   | 94346.9 | ##### | 12.35 | 0.04816 | 0.00169 | 0.12326 | 0.00446 | 0.01856 | 0.00035 | 0.00164 | 0.00026 | 0.01 | 107  | 50  | 118  | 4  | 119  | 2.0  | 33   | 5   | 1.0 |
|    | 13102-04-19   | 423.6   | 161.6 | 2.62  | 0.04899 | 0.00561 | 0.15815 | 0.01804 | 0.02341 | 0.00049 | 0.00692 | 0.00226 | 0.01 | 147  | 217 | 149  | 16 | 149  | 3.0  | 139  | 45  | 1.0 |
|    | 13102-04-20   | 7433.4  | ##### | 4.36  | 0.04859 | 0.00137 | 0.15718 | 0.00466 | 0.02346 | 0.00038 | 0.00714 | 0.00257 | 0.01 | 128  | 40  | 148  | 4  | 149  | 2.0  | 144  | 52  | 1.0 |

L3, Quantou-Fenglin of Yongkang county in Yongkang Basin

|    |            |      |     |      |         |         |         |         |         |         |         |         |      |      |     |     |    |     |     |      |    |     |
|----|------------|------|-----|------|---------|---------|---------|---------|---------|---------|---------|---------|------|------|-----|-----|----|-----|-----|------|----|-----|
| C1 | 0126-01-1  | 382  | 128 | 2.99 | 0.04879 | 0.00344 | 0.12527 | 0.00854 | 0.01862 | 0.00044 | 0.00507 | 0.00049 | 0.07 | 138  | 160 | 120 | 8  | 119 | 3.0 | 102  | 10 | 1.0 |
|    | 0126-01-2  | 242  | 76  | 3.17 | 0.07498 | 0.00583 | 0.17838 | 0.01320 | 0.01725 | 0.00052 | 0.00274 | 0.00020 | 0.08 | 1068 | 161 | 167 | 11 | 110 | 3.0 | 55   | 4  | 0.7 |
|    | 0126-01-3  | 227  | 80  | 2.85 | 0.04846 | 0.00206 | 0.12494 | 0.00527 | 0.01870 | 0.00032 | 0.00367 | 0.00016 | 0.18 | 122  | 97  | 120 | 5  | 119 | 2.0 | 74   | 3  | 1.0 |
|    | 0126-01-4  | 299  | 105 | 2.86 | 0.04876 | 0.00235 | 0.12297 | 0.00580 | 0.01829 | 0.00033 | 0.00507 | 0.00032 | 0.13 | 136  | 110 | 118 | 5  | 117 | 2.0 | 102  | 6  | 1.0 |
|    | 0126-01-5  | 279  | 86  | 3.26 | 0.04912 | 0.00176 | 0.12786 | 0.00456 | 0.01888 | 0.00030 | 0.00421 | 0.00018 | 0.21 | 154  | 85  | 122 | 4  | 121 | 2.0 | 85   | 4  | 1.0 |
|    | 0126-01-6  | 67   | 25  | 2.71 | 0.04904 | 0.00460 | 0.12511 | 0.01159 | 0.01851 | 0.00041 | 0.00417 | 0.00027 | 0.07 | 150  | 213 | 120 | 10 | 118 | 3.0 | 84   | 5  | 1.0 |
|    | 0126-01-7  | 192  | 72  | 2.66 | 0.04830 | 0.00238 | 0.11858 | 0.00573 | 0.01781 | 0.00031 | 0.00588 | 0.00043 | 0.12 | 114  | 111 | 114 | 5  | 114 | 2.0 | 118  | 9  | 1.0 |
|    | 0126-01-8  | 260  | 49  | 5.31 | 0.09675 | 0.01299 | 0.22528 | 0.02952 | 0.01689 | 0.00049 | 0.00495 | 0.00013 | 0.59 | 1562 | 265 | 206 | 24 | 108 | 3.0 | 100  | 3  | 0.5 |
|    | 0126-01-9  | 119  | 39  | 3.07 | 0.05107 | 0.00521 | 0.12120 | 0.01202 | 0.01721 | 0.00048 | 0.00554 | 0.00065 | 0.04 | 244  | 233 | 116 | 11 | 110 | 3.0 | 112  | 13 | 0.9 |
|    | 0126-01-10 | 123  | 40  | 3.06 | 0.05708 | 0.00467 | 0.14117 | 0.01120 | 0.01794 | 0.00045 | 0.00620 | 0.00069 | 0.06 | 495  | 186 | 134 | 10 | 115 | 3.0 | 125  | 14 | 0.9 |
|    | 0126-01-11 | 96   | 21  | 4.58 | 0.09519 | 0.01496 | 0.22317 | 0.03320 | 0.01700 | 0.00092 | 0.00478 | 0.00047 | 0.02 | 1532 | 316 | 205 | 28 | 109 | 6.0 | 96   | 9  | 0.5 |
|    | 0126-01-12 | 246  | 45  | 5.49 | 0.04959 | 0.00371 | 0.12423 | 0.00906 | 0.01817 | 0.00040 | 0.00581 | 0.00041 | 0.06 | 176  | 170 | 119 | 8  | 116 | 3.0 | 117  | 8  | 1.0 |
|    | 0126-01-13 | 110  | 44  | 2.50 | 0.04878 | 0.00489 | 0.11873 | 0.01159 | 0.01765 | 0.00049 | 0.00625 | 0.00061 | 0.05 | 137  | 224 | 114 | 11 | 113 | 3.0 | 126  | 12 | 1.0 |
|    | 0126-01-14 | 403  | 72  | 5.62 | 0.04726 | 0.00364 | 0.12013 | 0.00898 | 0.01845 | 0.00043 | 0.00583 | 0.00056 | 0.06 | 62   | 172 | 115 | 8  | 118 | 3.0 | 117  | 11 | 1.0 |
|    | 0126-01-15 | 93   | 34  | 2.75 | 0.04774 | 0.00322 | 0.12188 | 0.00812 | 0.01852 | 0.00035 | 0.00429 | 0.00022 | 0.10 | 86   | 151 | 117 | 7  | 118 | 2.0 | 87   | 4  | 1.0 |
|    | 0126-01-16 | 171  | 63  | 2.69 | 0.05059 | 0.00293 | 0.12480 | 0.00705 | 0.01790 | 0.00035 | 0.00502 | 0.00038 | 0.10 | 222  | 134 | 119 | 6  | 114 | 2.0 | 101  | 8  | 1.0 |
|    | 0126-01-17 | 215  | 56  | 3.81 | 0.06211 | 0.00373 | 0.16173 | 0.00933 | 0.01890 | 0.00041 | 0.00573 | 0.00051 | 0.08 | 678  | 132 | 152 | 8  | 121 | 3.0 | 115  | 10 | 0.8 |
|    | 0126-01-18 | 347  | 119 | 2.91 | 0.04764 | 0.00186 | 0.11892 | 0.00455 | 0.01811 | 0.00029 | 0.00541 | 0.00039 | 0.16 | 81   | 87  | 114 | 4  | 116 | 2.0 | 109  | 8  | 1.0 |
|    | 0126-01-19 | 402  | 72  | 5.59 | 0.04789 | 0.00217 | 0.11934 | 0.00530 | 0.01808 | 0.00030 | 0.00484 | 0.00028 | 0.13 | 94   | 102 | 114 | 5  | 116 | 2.0 | 98   | 6  | 1.0 |
|    | 0126-01-20 | 172  | 59  | 2.89 | 0.04826 | 0.00239 | 0.12210 | 0.00594 | 0.01836 | 0.00031 | 0.00470 | 0.00030 | 0.12 | 112  | 112 | 117 | 5  | 117 | 2.0 | 95   | 6  | 1.0 |
| C2 | 0126-02-1  | 402  | 132 | 3.04 | 0.05036 | 0.00165 | 0.13208 | 0.00429 | 0.01902 | 0.00029 | 0.00421 | 0.00018 | 0.22 | 212  | 78  | 126 | 4  | 121 | 2.0 | 85   | 4  | 1.0 |
|    | 0126-02-2  | 483  | 157 | 3.07 | 0.05574 | 0.00381 | 0.14982 | 0.00984 | 0.01949 | 0.00048 | 0.00434 | 0.00044 | 0.08 | 442  | 157 | 142 | 9  | 124 | 3.0 | 88   | 9  | 0.9 |
|    | 0126-02-3  | 119  | 30  | 3.96 | 0.09609 | 0.00680 | 0.28595 | 0.01911 | 0.02159 | 0.00060 | 0.00709 | 0.00052 | 0.06 | 1550 | 137 | 255 | 15 | 138 | 4.0 | 143  | 10 | 0.5 |
|    | 0126-02-4  | 549  | 219 | 2.51 | 0.04772 | 0.00146 | 0.12626 | 0.00390 | 0.01919 | 0.00031 | 0.00273 | 0.00011 | 0.28 | 85   | 70  | 121 | 4  | 123 | 2.0 | 55   | 2  | 1.0 |
|    | 0126-02-5  | 731  | 290 | 2.52 | 0.04965 | 0.00231 | 0.13370 | 0.00603 | 0.01953 | 0.00037 | 0.00493 | 0.00049 | 0.13 | 179  | 108 | 127 | 5  | 125 | 2.0 | 99   | 10 | 1.0 |
|    | 0126-02-6  | 256  | 86  | 2.99 | 0.04841 | 0.00223 | 0.12990 | 0.00591 | 0.01947 | 0.00034 | 0.00344 | 0.00017 | 0.16 | 119  | 105 | 124 | 5  | 124 | 2.0 | 69   | 3  | 1.0 |
|    | 0126-02-7  | 285  | 67  | 4.25 | 0.05166 | 0.00305 | 0.13884 | 0.00800 | 0.01949 | 0.00039 | 0.00392 | 0.00023 | 0.10 | 270  | 137 | 132 | 7  | 124 | 2.0 | 79   | 5  | 0.9 |
|    | 0126-02-8  | 1152 | 293 | 3.93 | 0.04810 | 0.00128 | 0.12842 | 0.00348 | 0.01937 | 0.00030 | 0.00312 | 0.00015 | 0.32 | 104  | 63  | 123 | 3  | 124 | 2.0 | 63   | 3  | 1.0 |
|    | 0126-02-9  | 1449 | 439 | 3.30 | 0.05244 | 0.00248 | 0.13960 | 0.00637 | 0.01931 | 0.00042 | 0.00082 | 0.00005 | 0.16 | 305  | 111 | 133 | 6  | 123 | 3.0 | 17   | 1  | 0.9 |
|    | 0126-02-10 | 757  | 168 | 4.50 | 0.05298 | 0.00284 | 0.14175 | 0.00737 | 0.01942 | 0.00042 | 0.00253 | 0.00020 | 0.13 | 328  | 125 | 135 | 7  | 124 | 3.0 | 51   | 4  | 0.9 |
|    | 0126-02-11 | 1327 | 480 | 2.77 | 0.04335 | 0.00193 | 0.11404 | 0.00496 | 0.01909 | 0.00039 | 0.00083 | 0.00004 | 0.18 | -105 | 98  | 110 | 5  | 122 | 2.0 | 16.8 | 1  | 1.1 |
|    | 0126-02-12 | 114  | 20  | 5.60 | 0.04908 | 0.01225 | 0.12957 | 0.03161 | 0.01915 | 0.00107 | 0.00316 | 0.00036 | 0.01 | 152  | 437 | 124 | 28 | 122 | 7.0 | 64   | 7  | 1.0 |
|    | 0126-02-13 | 943  | 397 | 2.37 | 0.04887 | 0.00252 | 0.12720 | 0.00637 | 0.01890 | 0.00040 | 0.00235 | 0.00019 | 0.14 | 142  | 117 | 122 | 6  | 121 | 3.0 | 47   | 4  | 1.0 |
|    | 0126-02-14 | 892  | 157 | 5.67 | 0.04900 | 0.00227 | 0.13018 | 0.00591 | 0.01927 | 0.00037 | 0.00291 | 0.00015 | 0.16 | 148  | 106 | 124 | 5  | 123 | 2.0 | 59   | 3  | 1.0 |
|    | 0126-02-15 | 356  | 98  | 3.62 | 0.04860 | 0.00194 | 0.12795 | 0.00504 | 0.01910 | 0.00031 | 0.00409 | 0.00019 | 0.17 | 129  | 93  | 122 | 5  | 122 | 2.0 | 82   | 4  | 1.0 |
| C3 | 1102-01-1  | 509  | 187 | 2.72 | 0.11410 | 0.00594 | 0.30075 | 0.01524 | 0.01912 | 0.00038 | 0.00619 | 0.00084 | 0.13 | 1866 | 96  | 267 | 12 | 122 | 2.0 | 125  | 17 | 0.5 |
|    | 1102-01-2  | 301  | 105 | 2.85 | 0.05241 | 0.00942 | 0.13376 | 0.02390 | 0.01852 | 0.00048 | 0.00863 | 0.00364 | 0.03 | 303  | 367 | 127 | 21 | 118 | 3.0 | 174  | 73 | 0.9 |
|    | 1102-01-3  | 492  | 182 | 2.71 | 0.05050 | 0.00588 | 0.13571 | 0.01566 | 0.01950 | 0.00043 | 0.00989 | 0.00421 | 0.05 | 218  | 262 | 129 | 14 | 124 | 3.0 | 199  | 84 | 1.0 |
|    | 1102-01-4  | 311  | 110 | 2.82 | 0.04749 | 0.00948 | 0.11482 | 0.02279 | 0.01754 | 0.00045 | 0.00387 | 0.00064 | 0.02 | 74   | 351 | 110 | 21 | 112 | 3.0 | 78   | 13 | 1.0 |
|    | 1102-01-5  | 258  | 87  | 2.98 | 0.04950 | 0.01181 | 0.11826 | 0.02806 | 0.01733 | 0.00050 | 0.00552 | 0.00150 | 0.02 | 172  | 420 | 113 | 25 | 111 | 3.0 | 111  | 30 | 1.0 |
|    | 1102-01-6  | 1157 | 327 | 3.53 | 0.04714 | 0.00401 | 0.12222 | 0.01026 | 0.01883 | 0.00039 | 0.00224 | 0.00024 | 0.07 | 56   | 191 | 117 | 9  | 120 | 2.0 | 45   | 5  | 1.0 |
|    | 1102-01-7  | 824  | 328 | 2.51 | 0.05822 | 0.00447 | 0.13778 | 0.01044 | 0.01717 | 0.00035 | 0.00421 | 0.00084 | 0.08 | 538  | 174 | 131 | 9  | 110 | 2.0 | 85   | 17 | 0.8 |
|    | 1102-01-8  | 969  | 234 | 4.14 | 0.04759 | 0.00547 | 0.12888 | 0.01465 | 0.01964 | 0.00046 | 0.00805 | 0.00347 | 0.05 | 79   | 237 | 123 | 13 | 125 | 3.0 | 162  | 70 | 1.0 |
|    | 1102-01-9  | 165  | 66  | 2.51 | 0.11623 | 0.01452 | 0.31348 | 0.03807 | 0.01957 | 0.00066 | 0.00423 | 0.00082 | 0.03 | 1899 | 235 | 277 | 29 | 125 | 4.0 | 85   | 17 | 0.5 |
|    | 1102-01-10 | 809  | 169 | 4.80 | 0.04926 | 0.00645 | 0.12448 | 0.01620 | 0.01833 | 0.00041 | 0.00442 | 0.00098 | 0.05 | 160  | 272 | 119 | 15 | 117 | 3.0 | 89   | 20 | 1.0 |
|    | 1102-01-11 | 276  | 92  | 3.00 | 0.05000 | 0.01142 | 0.12289 | 0.02792 | 0.01783 | 0.00052 | 0.00706 | 0.00210 | 0.02 | 195  | 411 | 118 | 25 | 114 | 3.0 | 142  | 42 | 1.0 |
|    | 1102-01-12 | 497  | 181 | 2.75 | 0.05060 | 0.00599 | 0.12908 | 0.01517 | 0.01851 | 0.00040 | 0.00549 | 0.00136 | 0.05 | 223  | 267 | 123 | 14 | 118 | 3.0 | 111  | 27 | 1.0 |
|    | 1102-01-13 | 717  | 205 | 3.50 | 0.05605 | 0.00676 | 0.13471 | 0.01609 | 0.01743 | 0.00040 | 0.00520 | 0.00179 | 0.05 | 454  | 275 | 128 | 14 | 111 | 3.0 | 105  | 36 | 0.9 |
|    | 1102-01-14 | 398  | 139 | 2.87 | 0.05220 | 0.00847 | 0.12826 | 0.02065 | 0.01782 | 0.00046 | 0.00600 | 0.00249 | 0.03 | 294  | 335 | 123 | 19 | 114 | 3.0 | 121  | 50 | 0.9 |
|    | 1102-01-15 | 252  | 86  | 2.93 | 0.05015 | 0.01284 | 0.12110 | 0.03083 | 0.01752 | 0.00055 | 0.00677 | 0.00234 | 0.02 | 202  | 453 | 116 | 28 | 112 | 3.0 | 136  | 47 | 1.0 |
| C4 | 0127-01-1  | 202  | 70  | 2.90 | 0.04841 | 0.00628 | 0.11973 | 0.01502 | 0.01795 | 0.00067 | 0.00299 | 0.00035 | 0.03 | 119  | 264 | 115 | 14 | 115 | 4.0 | 60   | 7  | 1.0 |
|    | 0127-01-2  | 195  | 65  | 3.02 | 0.04836 | 0.00495 | 0.12187 | 0.01210 | 0.01828 | 0.00054 | 0.00486 | 0.00050 | 0.04 | 117  | 228 | 117 | 11 | 117 | 3.0 | 98   | 10 | 1.0 |
|    | 0127-01-3  | 2454 | 354 | 6.92 | 0.04999 | 0.00264 | 0.12452 | 0.00639 | 0.01807 | 0.00040 | 0.00233 | 0.00012 | 0.15 | 195  | 122 | 119 | 6  | 115 | 3.0 | 47   | 2  | 1.0 |
|    | 0127-01-4  | 652  | 96  | 6.79 | 0.05105 | 0.00515 | 0.12895 | 0.01253 | 0.01833 | 0.00060 | 0.00192 | 0.00014 | 0.05 | 243  | 230 | 123 | 11 | 117 | 4.0 | 39   | 3  | 1.0 |
|    | 0127-01-5  | 104  | 18  | 5.77 | 0.04767 | 0.01233 | 0.12125 | 0.03060 | 0.01844 | 0.00110 | 0.00579 | 0.00082 | 0.01 | 83   | 434 | 116 | 28 | 118 | 7.0 | 117  | 16 | 1.0 |
|    | 0127-01-6  | 565  | 134 | 4.22 | 0.04908 | 0.00200 | 0.12750 | 0.00515 | 0.01885 | 0.00032 | 0.00387 | 0.00021 | 0.19 | 152  | 95  | 122 | 5  | 120 | 2.0 | 78   | 4  | 1.0 |
|    | 0127-01-7  | 1141 | 150 | 7.61 | 0.04840 | 0.00169 | 0.12206 | 0.00427 | 0.01829 | 0.00031 | 0.00213 | 0.00007 | 0.25 | 119  | 81  | 117 | 4  | 117 | 2.0 | 43   | 1  | 1.0 |
|    | 0127-01-8  | 638  |     |      |         |         |         |         |         |         |         |         |      |      |     |     |    |     |     |      |    |     |



|    |              |        |       |      |         |         |         |         |         |         |         |         |       |      |      |     |     |     |      |     |     |     |
|----|--------------|--------|-------|------|---------|---------|---------|---------|---------|---------|---------|---------|-------|------|------|-----|-----|-----|------|-----|-----|-----|
|    | 0127-01-9    | 177    | 36    | 4.90 | 0.04934 | 0.00587 | 0.17868 | 0.02064 | 0.02627 | 0.00088 | 0.00603 | 0.00068 | 0.04  | 164  | 258  | 167 | 18  | 167 | 6.0  | 122 | 14  | 1.0 |
|    | 0127-01-10   | 53     | 10    | 5.48 | 0.04779 | 0.01615 | 0.12587 | 0.04178 | 0.01910 | 0.00127 | 0.00579 | 0.00099 | 0.01  | 89   | 562  | 120 | 38  | 122 | 8.0  | 117 | 20  | 1.0 |
|    | 0127-01-11   | 331    | 75    | 4.43 | 0.04567 | 0.00120 | 0.13831 | 0.00949 | 0.02196 | 0.00048 | 0.00590 | 0.00044 | 1.50  | -19  | 53   | 132 | 8   | 140 | 3.0  | 119 | 9   | 1.1 |
|    | 0127-01-12   | 100    | 34    | 2.92 | 0.04859 | 0.00321 | 0.12662 | 0.02413 | 0.01890 | 0.00100 | 0.00134 | 0.00016 | 1.72  | 128  | 149  | 121 | 22  | 121 | 6.0  | 27  | 3   | 1.0 |
|    | 0127-01-13   | 108    | 35    | 3.12 | 0.04833 | 0.00956 | 0.12674 | 0.01217 | 0.01902 | 0.00050 | 0.00520 | 0.00048 | -5.79 | 115  | 352  | 121 | 11  | 121 | 3.0  | 105 | 10  | 1.0 |
|    | 0127-01-14   | 2381   | 259   | 9.19 | 0.04821 | 0.00476 | 0.12901 | 0.00367 | 0.01941 | 0.00032 | 0.00259 | 0.00007 | -9.24 | 110  | 220  | 123 | 3   | 124 | 2.0  | 52  | 1   | 1.0 |
|    | 0127-01-15   | 1297   | 221   | 5.87 | 0.04833 | 0.00134 | 0.11810 | 0.00483 | 0.01772 | 0.00033 | 0.00246 | 0.00011 | 0.82  | 115  | 66   | 113 | 4   | 113 | 2.0  | 50  | 2   | 1.0 |
|    | 0127-01-16   | 399    | 119   | 3.37 | 0.05121 | 0.00200 | 0.12931 | 0.00496 | 0.01831 | 0.00031 | 0.00532 | 0.00030 | 0.18  | 250  | 92   | 123 | 4   | 117 | 2.0  | 107 | 6   | 1.0 |
|    | 0127-01-17   | 369    | 72    | 5.16 | 0.04858 | 0.00199 | 0.12735 | 0.00641 | 0.01901 | 0.00034 | 0.00532 | 0.00035 | 0.65  | 128  | 94   | 122 | 6   | 121 | 2.0  | 107 | 7   | 1.0 |
|    | 0127-01-18   | 1046   | 122   | 8.54 | 0.04830 | 0.00250 | 0.12990 | 0.00498 | 0.01951 | 0.00033 | 0.00227 | 0.00008 | -0.71 | 114  | 117  | 124 | 4   | 125 | 2.0  | 46  | 2   | 1.0 |
|    | 0127-01-19   | 268    | 53    | 5.01 | 0.04847 | 0.00186 | 0.11505 | 0.01457 | 0.01721 | 0.00063 | 0.00347 | 0.00040 | 1.72  | 122  | 89   | 111 | 13  | 110 | 4.0  | 70  | 8   | 1.0 |
|    | 0127-01-20   | 1135   | 243   | 4.67 | 0.04851 | 0.00634 | 0.11536 | 0.00318 | 0.01725 | 0.00027 | 0.00204 | 0.00008 | ####  | 124  | 266  | 111 | 3   | 110 | 2.0  | 41  | 2   | 1.0 |
| C5 | 0127-10-1    | 522    | 160   | 3.27 | 0.04829 | 0.00272 | 0.11477 | 0.00627 | 0.01724 | 0.00035 | 0.00423 | 0.00043 | 0.10  | 114  | 127  | 110 | 6   | 110 | 2.0  | 85  | 9   | 1.0 |
|    | 0127-10-2    | 243    | 88    | 2.75 | 0.05064 | 0.00564 | 0.12639 | 0.01356 | 0.01811 | 0.00063 | 0.00253 | 0.00030 | 0.04  | 224  | 251  | 121 | 12  | 116 | 4.0  | 51  | 6   | 1.0 |
|    | 0127-10-3    | 245    | 59    | 4.14 | 0.04834 | 0.00319 | 0.12046 | 0.00774 | 0.01807 | 0.00037 | 0.00499 | 0.00041 | 0.07  | 116  | 148  | 115 | 7   | 115 | 2.0  | 101 | 8   | 1.0 |
|    | 0127-10-4    | 695    | 199   | 3.50 | 0.04769 | 0.00175 | 0.11603 | 0.00424 | 0.01765 | 0.00031 | 0.00192 | 0.00009 | 0.23  | 84   | 83   | 111 | 4   | 113 | 2.0  | 39  | 2   | 1.0 |
|    | 0127-10-5    | 474    | 162   | 2.92 | 0.04907 | 0.00199 | 0.11801 | 0.00473 | 0.01744 | 0.00031 | 0.00278 | 0.00016 | 0.19  | 151  | 94   | 113 | 4   | 111 | 2.0  | 56  | 3   | 1.0 |
|    | 0127-10-6    | 824    | 162   | 5.08 | 0.04820 | 0.00227 | 0.11820 | 0.00546 | 0.01779 | 0.00033 | 0.00293 | 0.00014 | 0.15  | 109  | 106  | 113 | 5   | 114 | 2.0  | 59  | 3   | 1.0 |
|    | 0127-10-7    | 296    | 140   | 2.11 | 0.04812 | 0.00189 | 0.11829 | 0.00458 | 0.01783 | 0.00030 | 0.00349 | 0.00017 | 0.18  | 105  | 89   | 114 | 4   | 114 | 2.0  | 70  | 3   | 1.0 |
|    | 0127-10-8    | 730    | 169   | 4.33 | 0.04850 | 0.00217 | 0.11555 | 0.00507 | 0.01731 | 0.00033 | 0.00154 | 0.00006 | 0.17  | 124  | 102  | 111 | 5   | 111 | 2.0  | 31  | 1   | 1.0 |
|    | 0127-10-9    | 437    | 71    | 6.18 | 0.04844 | 0.00243 | 0.12056 | 0.00595 | 0.01806 | 0.00033 | 0.00276 | 0.00010 | 0.14  | 121  | 114  | 116 | 5   | 115 | 2.0  | 56  | 2   | 1.0 |
|    | 0127-10-10   | 217    | 74    | 2.95 | 0.04837 | 0.00339 | 0.11907 | 0.00813 | 0.01785 | 0.00039 | 0.00459 | 0.00037 | 0.08  | 117  | 158  | 114 | 7   | 114 | 2.0  | 93  | 7   | 1.0 |
|    | 0127-10-11   | 1340   | 343   | 3.91 | 0.04840 | 0.00177 | 0.11843 | 0.00429 | 0.01779 | 0.00032 | 0.00214 | 0.00010 | 0.23  | 119  | 85   | 114 | 4   | 114 | 2.0  | 43  | 2   | 1.0 |
|    | 0127-10-12   | 386    | 116   | 3.32 | 0.04897 | 0.00290 | 0.11559 | 0.00665 | 0.01712 | 0.00035 | 0.00456 | 0.00044 | 0.09  | 146  | 134  | 111 | 6   | 109 | 2.0  | 92  | 9   | 1.0 |
|    | 0127-10-13   | 311    | 167   | 1.86 | 0.04841 | 0.00216 | 0.12215 | 0.00535 | 0.01830 | 0.00033 | 0.00466 | 0.00038 | 0.16  | 119  | 101  | 117 | 5   | 117 | 2.0  | 94  | 8   | 1.0 |
|    | 0127-10-14   | 535    | 174   | 3.07 | 0.04891 | 0.00159 | 0.11900 | 0.00379 | 0.01765 | 0.00026 | 0.00479 | 0.00037 | 0.19  | 144  | 77   | 114 | 3   | 113 | 2.0  | 97  | 7   | 1.0 |
|    | 0127-10-15   | 366    | 86    | 4.27 | 0.04816 | 0.00353 | 0.11477 | 0.00817 | 0.01729 | 0.00040 | 0.00444 | 0.00048 | 0.07  | 107  | 165  | 110 | 7   | 111 | 3.0  | 90  | 10  | 1.0 |
| C6 | 1102-02-1    | 279    | 97    | 2.89 | 0.04771 | 0.00304 | 0.12745 | 0.00786 | 0.01938 | 0.00031 | 0.00615 | 0.00015 | 0.51  | 85   | 142  | 122 | 7   | 124 | 2.0  | 124 | 3   | 1.0 |
|    | 1102-02-2    | 682    | 178   | 3.83 | 0.05127 | 0.00088 | 0.13485 | 0.00250 | 0.01908 | 0.00025 | 0.00513 | 0.00013 | 0.45  | 253  | 40   | 128 | 2   | 122 | 2.0  | 103 | 3   | 1.0 |
|    | 1102-02-3    | 764    | 189   | 4.05 | 0.05411 | 0.00168 | 0.14792 | 0.00455 | 0.01983 | 0.00030 | 0.00644 | 0.00035 | 0.23  | 376  | 72   | 140 | 4   | 127 | 2.0  | 130 | 7   | 0.9 |
|    | 1102-02-4    | 680    | 165   | 4.13 | 0.04841 | 0.00088 | 0.12785 | 0.00248 | 0.01915 | 0.00026 | 0.00479 | 0.00012 | 0.44  | 119  | 44   | 122 | 2   | 122 | 2.0  | 97  | 2   | 1.0 |
|    | 1102-02-5    | 704    | 226   | 3.12 | 0.05431 | 0.00131 | 0.14588 | 0.00366 | 0.01948 | 0.00029 | 0.00468 | 0.00020 | 0.36  | 384  | 55   | 138 | 3   | 124 | 2.0  | 94  | 4   | 0.9 |
|    | 1102-02-6    | 170    | 65    | 2.63 | 0.12382 | 0.00483 | 0.34521 | 0.01292 | 0.02022 | 0.00043 | 0.00511 | 0.00025 | 0.21  | 2012 | 71   | 301 | 10  | 129 | 3.0  | 103 | 5   | 0.4 |
|    | 1102-02-7    | 848    | 187   | 4.53 | 0.05012 | 0.00085 | 0.13104 | 0.00237 | 0.01896 | 0.00025 | 0.00522 | 0.00015 | 0.45  | 201  | 40   | 125 | 2   | 121 | 2.0  | 105 | 3   | 1.0 |
|    | 1102-02-8    | 396    | 137   | 2.89 | 0.04799 | 0.00101 | 0.13228 | 0.00293 | 0.02000 | 0.00028 | 0.00469 | 0.00014 | 0.39  | 99   | 51   | 126 | 3   | 128 | 2.0  | 95  | 3   | 1.0 |
|    | 1102-02-9    | 207    | 75    | 2.78 | 0.04841 | 0.00143 | 0.12986 | 0.00390 | 0.01946 | 0.00028 | 0.00472 | 0.00015 | 0.27  | 119  | 70   | 124 | 4   | 124 | 2.0  | 95  | 3   | 1.0 |
|    | 1102-02-10   | 639    | 79    | 8.06 | 0.04942 | 0.00131 | 0.13378 | 0.00361 | 0.01964 | 0.00027 | 0.00555 | 0.00017 | 0.29  | 168  | 63   | 127 | 3   | 125 | 2.0  | 112 | 3   | 1.0 |
|    | 1102-02-11   | 209    | 70    | 3.00 | 0.05449 | 0.00346 | 0.14317 | 0.00890 | 0.01906 | 0.00042 | 0.00297 | 0.00024 | 0.12  | 391  | 147  | 136 | 8   | 122 | 3.0  | 60  | 5   | 0.9 |
|    | 1102-02-12   | 500    | 148   | 3.38 | 0.04834 | 0.00100 | 0.12912 | 0.00281 | 0.01937 | 0.00027 | 0.00471 | 0.00016 | 0.40  | 116  | 50   | 123 | 3   | 124 | 2.0  | 95  | 3   | 1.0 |
|    | 1102-02-13   | 371    | 106   | 3.51 | 0.04931 | 0.00111 | 0.13246 | 0.00308 | 0.01949 | 0.00026 | 0.00484 | 0.00016 | 0.34  | 163  | 54   | 126 | 3   | 124 | 2.0  | 98  | 3   | 1.0 |
|    | 1102-02-14   | 952    | 214   | 4.45 | 0.05165 | 0.00140 | 0.14097 | 0.00392 | 0.01980 | 0.00031 | 0.00359 | 0.00020 | 0.33  | 270  | 64   | 134 | 3   | 126 | 2.0  | 72  | 4   | 0.9 |
|    | 1102-02-15   | 412    | 127   | 3.24 | 0.04926 | 0.00122 | 0.13504 | 0.00345 | 0.01989 | 0.00029 | 0.00468 | 0.00019 | 0.34  | 160  | 59   | 129 | 3   | 127 | 2.0  | 94  | 4   | 1.0 |
| C7 | 1309-11zk-01 | 178.6  | 18.8  | 9.50 | 0.04906 | 0.04478 | 0.13825 | 0.12579 | 0.02044 | 0.00151 | 0.00744 | 0.00199 | 0.01  | 151  | 1148 | 131 | 112 | 130 | 10.0 | 150 | 40  | 1.0 |
|    | 1309-11zk-03 | 1015.3 | 158.3 | 6.42 | 0.04876 | 0.00924 | 0.14368 | 0.02703 | 0.02137 | 0.00066 | 0.00394 | 0.00095 | 0.01  | 136  | 304  | 136 | 24  | 136 | 4.0  | 79  | 19  | 1.0 |
|    | 1309-11zk-02 | 474.8  | 83.3  | 5.70 | 0.04835 | 0.01271 | 0.13695 | 0.03583 | 0.02054 | 0.00066 | 0.00442 | 0.00093 | 0.01  | 116  | 404  | 130 | 32  | 131 | 4.0  | 89  | 19  | 1.0 |
|    | 1309-11zk-04 | 383.1  | 70.6  | 5.43 | 0.04904 | 0.01144 | 0.14596 | 0.03393 | 0.02159 | 0.00058 | 0.01005 | 0.00311 | 0.01  | 150  | 374  | 138 | 30  | 138 | 4.0  | 202 | 62  | 1.0 |
|    | 1309-11zk-05 | 555.8  | 102.4 | 5.43 | 0.04838 | 0.01184 | 0.15070 | 0.03665 | 0.02259 | 0.00077 | 0.00255 | 0.00052 | 0.01  | 118  | 377  | 143 | 32  | 144 | 5.0  | 51  | 10  | 1.0 |
|    | 1309-11zk-06 | 330.2  | 72.1  | 4.58 | 0.06116 | 0.01813 | 0.17386 | 0.05110 | 0.02061 | 0.00090 | 0.00430 | 0.00109 | 0.01  | 645  | 513  | 163 | 44  | 132 | 6.0  | 87  | 22  | 0.8 |
|    | 1309-11zk-07 | 467.0  | 87.1  | 5.36 | 0.04559 | 0.01646 | 0.13524 | 0.04856 | 0.02150 | 0.00094 | 0.00244 | 0.00060 | 0.01  | -24  | 513  | 129 | 43  | 137 | 6.0  | 49  | 12  | 1.1 |
|    | 1309-11zk-08 | 642.8  | 98.3  | 6.54 | 0.05990 | 0.01048 | 0.17944 | 0.03110 | 0.02173 | 0.00063 | 0.01414 | 0.01005 | 0.01  | 600  | 336  | 168 | 27  | 139 | 4.0  | 284 | 200 | 0.8 |
|    | 1309-11zk-09 | 1365.1 | 333.1 | 4.10 | 0.04811 | 0.00454 | 0.14186 | 0.01327 | 0.02138 | 0.00052 | 0.00247 | 0.00049 | 0.01  | 105  | 163  | 135 | 12  | 136 | 3.0  | 50  | 10  | 1.0 |
|    | 1309-11zk-10 | 123.8  | 29.2  | 4.24 | 0.04939 | 0.03723 | 0.13922 | 0.10454 | 0.02045 | 0.00138 | 0.02110 | 0.02321 | 0.01  | 166  | 1062 | 132 | 93  | 130 | 9.0  | 422 | 459 | 1.0 |
|    | 1309-11zk-11 | 340.9  | 64.0  | 5.32 | 0.04896 | 0.01532 | 0.12650 | 0.03943 | 0.01874 | 0.00062 | 0.01580 | 0.01182 | 0.01  | 146  | 481  | 121 | 36  | 120 | 4.0  | 317 | 235 | 1.0 |
|    | 1309-11zk-12 | 1019.2 | 165.3 | 6.17 | 0.05146 | 0.01475 | 0.15689 | 0.04443 | 0.02214 | 0.00110 | 0.00324 | 0.00117 | 0.01  | 261  | 437  | 148 | 39  | 141 | 7.0  | 65  | 24  | 1.0 |
|    | 1309-11zk-13 | 544.8  | 193.6 | 2.81 | 0.05408 | 0.00688 | 0.15685 | 0.01970 | 0.02103 | 0.00060 | 0.01167 | 0.00023 | 0.01  | 374  | 230  | 148 | 17  | 134 | 4.0  | 34  | 5   | 0.9 |
|    | 1309-11zk-14 | 84.4   | 18.6  | 4.53 | 0.04791 | 0.04429 | 0.12033 | 0.11091 | 0.01822 | 0.00133 | 0.00777 | 0.      |       |      |      |     |     |     |      |     |     |     |



|    |              |         |       |        |         |         |         |         |           |         |         |         |      |      |     |      |     |      |      |     |     |     |
|----|--------------|---------|-------|--------|---------|---------|---------|---------|-----------|---------|---------|---------|------|------|-----|------|-----|------|------|-----|-----|-----|
| D2 | LZ2-17-01    | 928     | 168   | 5.54   | 0.05038 | 0.00298 | 0.12786 | 0.00735 | 0.01841   | 0.00036 | 0.00556 | 0.00044 | 0.08 | 213  | 137 | 122  | 7   | 118  | 2.0  | 112 | 9   | 1.0 |
|    | LZ2-17-02    | 169     | 55    | 3.10   | 0.06426 | 0.00464 | 0.16119 | 0.01135 | 0.01819   | 0.00038 | 0.00611 | 0.00055 | 0.06 | 750  | 157 | 152  | 10  | 116  | 2.0  | 123 | 11  | 0.8 |
|    | LZ2-17-03    | 21      | 386   | 0.06   | 0.05592 | 0.00253 | 0.22586 | 0.00972 | 0.02930   | 0.00042 | 0.00912 | 0.00123 | 0.18 | 449  | 103 | 207  | 8   | 186  | 3.0  | 184 | 25  | 0.9 |
|    | LZ2-17-04    | 698     | 179   | 3.90   | 0.07536 | 0.01290 | 0.17753 | 0.03006 | 0.01708   | 0.00043 | 0.00514 | 0.00012 | 0.62 | 1078 | 372 | 166  | 26  | 109  | 3.0  | 104 | 2   | 0.7 |
|    | LZ2-17-05    | 474     | 83    | 5.69   | 0.05264 | 0.00513 | 0.13179 | 0.01247 | 0.01816   | 0.00050 | 0.00612 | 0.00059 | 0.04 | 313  | 223 | 126  | 11  | 116  | 3.0  | 123 | 12  | 0.9 |
|    | LZ2-17-06    | 418     | 68    | 6.13   | 0.06441 | 0.01797 | 0.15135 | 0.04185 | 0.01704   | 0.00064 | 0.00522 | 0.00026 | 0.62 | 755  | 565 | 143  | 37  | 109  | 4.0  | 105 | 5   | 0.8 |
|    | LZ2-17-07    | 864     | 142   | 6.09   | 0.07875 | 0.01905 | 0.18489 | 0.04434 | 0.01703   | 0.00053 | 0.00510 | 0.00013 | 0.74 | 1166 | 536 | 172  | 38  | 109  | 3.0  | 103 | 3   | 0.6 |
|    | LZ2-17-08    | 954     | 209   | 4.57   | 0.04695 | 0.00189 | 0.11890 | 0.00471 | 0.01837   | 0.00029 | 0.00555 | 0.00057 | 0.16 | 47   | 87  | 114  | 4   | 117  | 2.0  | 112 | 11  | 1.0 |
|    | LZ2-17-09    | 255     | 60    | 4.21   | 0.14771 | 0.05290 | 0.42005 | 0.14711 | 0.02062   | 0.00154 | 0.00579 | 0.00042 | 0.72 | 2320 | 804 | 356  | 105 | 132  | 10.0 | 117 | 9   | 0.4 |
|    | LZ2-17-10    | 844     | 198   | 4.26   | 0.07729 | 0.00358 | 0.19230 | 0.00848 | 0.01805   | 0.00036 | 0.00638 | 0.00074 | 0.11 | 1129 | 95  | 179  | 7   | 115  | 2.0  | 129 | 15  | 0.6 |
|    | LZ2-17-11    | 227     | 52    | 4.40   | 0.23246 | 0.02675 | 0.68178 | 0.07403 | 0.02127   | 0.00081 | 0.00572 | 0.00029 | 0.69 | 3069 | 191 | 528  | 45  | 136  | 5.0  | 115 | 6   | 0.3 |
|    | LZ2-17-12    | 244     | 49    | 4.98   | 0.08064 | 0.00840 | 0.20263 | 0.02013 | 0.01822   | 0.00063 | 0.00490 | 0.00042 | 0.03 | 1213 | 213 | 187  | 17  | 116  | 4.0  | 99  | 8   | 0.6 |
|    | LZ2-17-13    | 805     | 127   | 6.32   | 0.16676 | 0.00644 | 0.41734 | 0.01458 | 0.01815   | 0.00040 | 0.00577 | 0.00037 | 0.14 | 2525 | 66  | 354  | 10  | 116  | 3.0  | 116 | 7   | 0.3 |
|    | LZ2-17-14    | 1777    | 461   | 3.85   | 0.04976 | 0.00130 | 0.12577 | 0.00329 | 0.01833   | 0.00026 | 0.00457 | 0.00028 | 0.27 | 184  | 62  | 120  | 3   | 117  | 2.0  | 92  | 6   | 1.0 |
|    | LZ2-17-15    | 439     | 114   | 3.84   | 0.09186 | 0.00970 | 0.22476 | 0.02302 | 0.01775   | 0.00045 | 0.00523 | 0.00013 | 0.48 | 1464 | 209 | 206  | 19  | 113  | 3.0  | 105 | 3   | 0.5 |
|    | LZ2-17-16    | 1063    | 357   | 2.98   | 0.08186 | 0.00195 | 0.20533 | 0.00484 | 0.01819   | 0.00026 | 0.00589 | 0.00039 | 0.29 | 1242 | 48  | 190  | 4   | 116  | 2.0  | 119 | 8   | 0.6 |
|    | LZ2-17-17    | 319     | 75    | 4.27   | 0.09598 | 0.01140 | 0.23642 | 0.02719 | 0.01786   | 0.00053 | 0.00524 | 0.00015 | 0.48 | 1547 | 234 | 215  | 22  | 114  | 3.0  | 106 | 3   | 0.5 |
|    | LZ2-17-18    | 1454    | 277   | 5.26   | 0.10483 | 0.00318 | 0.26391 | 0.00763 | 0.01826   | 0.00030 | 0.00584 | 0.00042 | 0.20 | 1711 | 57  | 238  | 6   | 117  | 2.0  | 118 | 8   | 0.5 |
|    | LZ2-17-19    | 488     | 129   | 3.78   | 0.05234 | 0.00217 | 0.13246 | 0.00538 | 0.01835   | 0.00030 | 0.00448 | 0.00036 | 0.15 | 300  | 97  | 126  | 5   | 117  | 2.0  | 90  | 7   | 0.9 |
|    | LZ2-17-20    | 800     | 155   | 5.15   | 0.08320 | 0.00486 | 0.20692 | 0.01140 | 0.01804   | 0.00044 | 0.00496 | 0.00053 | 0.08 | 1274 | 117 | 191  | 10  | 115  | 3.0  | 100 | 11  | 0.6 |
| D3 | 1310-01zk-01 | 596.0   | 113.2 | 5.27   | 0.05022 | 0.00960 | 0.12405 | 0.02358 | 0.01792   | 0.00047 | 0.00599 | 0.00156 | 0.01 | 205  | 324 | 119  | 21  | 114  | 3.0  | 121 | 31  | 1.0 |
|    | 1310-01zk-02 | 378.7   | 193.5 | 1.96   | 0.04700 | 0.00642 | 0.14239 | 0.01930 | 0.02198   | 0.00057 | 0.00230 | 0.00034 | 0.01 | 49   | 230 | 135  | 17  | 140  | 4.0  | 46  | 7   | 1.0 |
|    | 1310-01zk-03 | 344.2   | 101.1 | 3.40   | 0.04905 | 0.00915 | 0.15340 | 0.02846 | 0.02269   | 0.00061 | 0.00304 | 0.00047 | 0.01 | 150  | 306 | 145  | 25  | 145  | 4.0  | 61  | 9   | 1.0 |
|    | 1310-01zk-04 | 274.8   | 83.4  | 3.29   | 0.04592 | 0.01353 | 0.11767 | 0.03452 | 0.01859   | 0.00061 | 0.00631 | 0.00204 | 0.01 | -6   | 431 | 113  | 31  | 119  | 4.0  | 127 | 41  | 1.1 |
|    | 1310-01zk-05 | 1295.2  | 412.8 | 3.14   | 0.05115 | 0.00277 | 0.26303 | 0.01419 | 0.03731   | 0.00077 | 0.00335 | 0.00046 | 0.01 | 248  | 86  | 237  | 11  | 236  | 5.0  | 68  | 9   | 1.0 |
|    | 1310-01zk-06 | 1252.3  | 188.9 | 6.63   | 0.04876 | 0.00487 | 0.13173 | 0.01310 | 0.01960   | 0.00037 | 0.00631 | 0.00154 | 0.01 | 136  | 187 | 126  | 12  | 125  | 2.0  | 127 | 31  | 1.0 |
|    | 1310-01zk-07 | 745.1   | 167.9 | 4.44   | 0.04837 | 0.00956 | 0.12269 | 0.02408 | 0.01840   | 0.00057 | 0.00257 | 0.00051 | 0.01 | 117  | 311 | 118  | 22  | 118  | 4.0  | 52  | 10  | 1.0 |
|    | 1310-01zk-08 | 226.9   | 73.0  | 3.11   | 0.04920 | 0.01864 | 0.11691 | 0.04407 | 0.01724   | 0.00072 | 0.00341 | 0.00074 | 0.01 | 157  | 579 | 112  | 40  | 110  | 5.0  | 69  | 15  | 1.0 |
|    | 1310-01zk-09 | 959.6   | 169.9 | 5.65   | 0.04840 | 0.00553 | 0.13107 | 0.01493 | 0.01964   | 0.00039 | 0.00427 | 0.00085 | 0.01 | 119  | 215 | 125  | 13  | 125  | 2.0  | 86  | 17  | 1.0 |
|    | 1310-01zk-10 | 280.9   | 84.4  | 3.33   | 0.09719 | 0.01434 | 0.30735 | 0.04411 | 0.02295   | 0.00086 | 0.01036 | 0.00552 | 0.01 | 1571 | 217 | 272  | 34  | 146  | 5.0  | 208 | 110 | 0.5 |
|    | 1310-01zk-11 | 19114.4 | ##### | 19.11  | 0.04844 | 0.00209 | 0.12960 | 0.00565 | 0.01941   | 0.00036 | 0.00186 | 0.00020 | 0.01 | 121  | 67  | 124  | 5   | 124  | 2.0  | 38  | 4   | 1.0 |
|    | 1310-01zk-12 | 25602.4 | ##### | 14.67  | 0.04924 | 0.00222 | 0.13098 | 0.00589 | 0.01932   | 0.00040 | 0.00096 | 0.00009 | 0.01 | 159  | 67  | 125  | 5   | 123  | 3.0  | 19  | 2   | 1.0 |
|    | 1310-01zk-13 | 19310.1 | 918.2 | 21.03  | 0.04872 | 0.00307 | 0.12661 | 0.00784 | 0.01889   | 0.00044 | 0.00087 | 0.00008 | 0.01 | 134  | 97  | 121  | 7   | 121  | 3.0  | 18  | 2   | 1.0 |
|    | 1310-01zk-14 | 11789.3 | 589.4 | 20.00  | 0.04874 | 0.00462 | 0.13039 | 0.01215 | 0.01942   | 0.00053 | 0.00131 | 0.00018 | 0.01 | 135  | 158 | 124  | 11  | 124  | 3.0  | 26  | 4   | 1.0 |
|    | 1310-01zk-15 | 25892.8 | ##### | 13.14  | 0.04864 | 0.00116 | 0.12349 | 0.00314 | 0.01842   | 0.00029 | 0.00235 | 0.00028 | 0.01 | 131  | 32  | 118  | 3   | 118  | 2.0  | 47  | 6   | 1.0 |
|    | 1310-01zk-16 | 10658.1 | 680.3 | 15.67  | 0.04828 | 0.00191 | 0.12586 | 0.00505 | 0.01891   | 0.00031 | 0.00255 | 0.00029 | 0.01 | 113  | 63  | 120  | 5   | 121  | 2.0  | 51  | 6   | 1.0 |
|    | 1310-01zk-17 | 34265.7 | ##### | 17.46  | 0.04910 | 0.00194 | 0.13368 | 0.00527 | 0.01977   | 0.00039 | 0.00075 | 0.00006 | 0.01 | 153  | 56  | 127  | 5   | 126  | 2.0  | 15  | 1   | 1.0 |
|    | 1310-01zk-18 | 54748.3 | 404.4 | 135.38 | 0.09838 | 0.00336 | 3.61031 | 0.12574 | 0.26636   | 0.00484 | 0.03948 | 0.01146 | 0.01 | 1594 | 38  | 1552 | 28  | 1522 | 25.0 | 783 | 223 | 1.0 |
|    | 1310-01zk-19 | 4449.6  | 361.1 | 12.32  | 0.11325 | 0.00808 | 0.32833 | 0.02237 | 0.02104   | 0.00062 | 0.00144 | 0.00020 | 0.01 | 1852 | 81  | 288  | 17  | 134  | 4.0  | 29  | 4   | 0.5 |
|    | 1310-01zk-20 | 20367.5 | ##### | 14.11  | 0.04862 | 0.00194 | 0.13491 | 0.00543 | 0.02014   | 0.00038 | 0.00152 | 0.00019 | 0.01 | 130  | 59  | 129  | 5   | 129  | 2.0  | 31  | 4   | 1.0 |
| D4 | 150118-02-01 | 368.1   | 171.0 | 2.15   | 0.04963 | 0.00157 | 0.15053 | 0.00462 | 0.02200   | 0.00036 | 0.00674 | 0.00024 | 0.21 | 178  | 76  | 142  | 4   | 140  | 2.0  | 136 | 5   | 1.0 |
|    | 150118-02-02 | 456.2   | 269.9 | 1.69   | 0.05073 | 0.00156 | 0.12701 | 0.00378 | 0.01816   | 0.00030 | 0.00480 | 0.00018 | 0.22 | 229  | 73  | 121  | 3   | 116  | 2.0  | 97  | 4   | 1.0 |
|    | 150118-02-03 | 258.8   | 148.9 | 1.74   | 0.04926 | 0.00182 | 0.15975 | 0.00570 | 0.02353   | 0.00041 | 0.00671 | 0.00028 | 0.17 | 160  | 87  | 150  | 5   | 150  | 3.0  | 135 | 6   | 1.0 |
|    | 150118-02-04 | 221.9   | 153.5 | 1.45   | 0.05100 | 0.00251 | 0.12872 | 0.00611 | 0.01831   | 0.00037 | 0.00517 | 0.00029 | 0.12 | 241  | 116 | 123  | 5   | 117  | 2.0  | 104 | 6   | 1.0 |
|    | 150118-02-05 | 48.2    | 40.0  | 1.21   | 0.04851 | 0.00603 | 0.12838 | 0.01549 | 0.01919</ |         |         |         |      |      |     |      |     |      |      |     |     |     |



|            |     |    |      |         |         |         |         |         |         |         |         |      |     |     |     |    |     |     |     |    |     |
|------------|-----|----|------|---------|---------|---------|---------|---------|---------|---------|---------|------|-----|-----|-----|----|-----|-----|-----|----|-----|
| 1103-08-5  | 131 | 53 | 2.48 | 0.04849 | 0.01666 | 0.10856 | 0.03704 | 0.01624 | 0.00071 | 0.00156 | 0.00028 | 0.01 | 123 | 578 | 105 | 34 | 104 | 5.0 | 32  | 6  | 1.0 |
| 1103-08-6  | 178 | 67 | 2.66 | 0.04628 | 0.01090 | 0.11267 | 0.02636 | 0.01766 | 0.00055 | 0.00171 | 0.00025 | 0.02 | 12  | 387 | 108 | 24 | 113 | 3.0 | 35  | 5  | 1.0 |
| 1103-08-7  | 120 | 50 | 2.39 | 0.04971 | 0.01419 | 0.11773 | 0.03342 | 0.01718 | 0.00058 | 0.00409 | 0.00098 | 0.01 | 181 | 491 | 113 | 30 | 110 | 4.0 | 82  | 20 | 1.0 |
| 1103-08-8  | 155 | 52 | 3.00 | 0.04795 | 0.01362 | 0.11179 | 0.03160 | 0.01692 | 0.00056 | 0.00162 | 0.00030 | 0.02 | 97  | 474 | 108 | 29 | 108 | 4.0 | 33  | 6  | 1.0 |
| 1103-08-9  | 126 | 50 | 2.51 | 0.04776 | 0.01377 | 0.11477 | 0.03293 | 0.01744 | 0.00057 | 0.00222 | 0.00038 | 0.01 | 87  | 481 | 110 | 30 | 111 | 4.0 | 45  | 8  | 1.0 |
| 1103-08-10 | 127 | 55 | 2.29 | 0.04789 | 0.01254 | 0.11188 | 0.02914 | 0.01695 | 0.00052 | 0.00270 | 0.00036 | 0.01 | 94  | 440 | 108 | 27 | 108 | 3.0 | 54  | 7  | 1.0 |
| 1103-08-11 | 157 | 64 | 2.46 | 0.04649 | 0.01120 | 0.11070 | 0.02652 | 0.01727 | 0.00051 | 0.00262 | 0.00034 | 0.02 | 23  | 397 | 107 | 24 | 110 | 3.0 | 53  | 7  | 1.0 |
| 1103-08-12 | 119 | 47 | 2.52 | 0.04819 | 0.01625 | 0.11735 | 0.03937 | 0.01767 | 0.00067 | 0.00645 | 0.00281 | 0.01 | 109 | 564 | 113 | 36 | 113 | 4.0 | 130 | 56 | 1.0 |
| 1103-08-13 | 217 | 64 | 3.40 | 0.04927 | 0.01177 | 0.11759 | 0.02791 | 0.01732 | 0.00055 | 0.00319 | 0.00065 | 0.02 | 161 | 420 | 113 | 25 | 111 | 3.0 | 64  | 13 | 1.0 |
| 1103-08-14 | 109 | 46 | 2.35 | 0.04874 | 0.01679 | 0.10983 | 0.03762 | 0.01635 | 0.00066 | 0.00388 | 0.00093 | 0.01 | 135 | 581 | 106 | 34 | 105 | 4.0 | 78  | 19 | 1.0 |
| 1103-08-15 | 299 | 71 | 4.24 | 0.04830 | 0.00977 | 0.11563 | 0.02325 | 0.01737 | 0.00048 | 0.00233 | 0.00029 | 0.02 | 114 | 361 | 111 | 21 | 111 | 3.0 | 47  | 6  | 1.0 |

D7

M1, NW Shengzhou basin (Li JH et al., 2014)

|           |     |     |      |        |     |       |     |         |     |  |  |  |      |      |  |  |       |     |  |  |
|-----------|-----|-----|------|--------|-----|-------|-----|---------|-----|--|--|--|------|------|--|--|-------|-----|--|--|
| zj28-1.1  | 193 | 222 | 0.9  | 0.06   | 35  | 0.168 | 36  | 0.02037 | 2.6 |  |  |  | 597  | 770  |  |  | 130   | 3.4 |  |  |
| zj28-1.2  | 166 | 168 | 1.02 | 0.011  | 95  | 0.03  | 95  | 0.01971 | 2.6 |  |  |  | -700 | 120  |  |  | 125.8 | 3.3 |  |  |
| zj28-1.3  | 346 | 263 | 1.36 | 0.025  | 50  | 0.07  | 50  | 0.01982 | 2.6 |  |  |  | -169 | 170  |  |  | 126.5 | 3.2 |  |  |
| zj28-1.4  | 72  | 86  | 0.86 | 0.046  | 23  | 0.119 | 23  | 0.01882 | 2.8 |  |  |  | -16  | 550  |  |  | 120.2 | 3.3 |  |  |
| zj28-1.5  | 449 | 364 | 1.27 | 0.0719 | 6.1 | 0.205 | 6.6 | 0.02067 | 2.4 |  |  |  | 984  | 120  |  |  | 131.9 | 3.1 |  |  |
| zj28-1.6  | 270 | 297 | 0.94 | 0.055  | 22  | 0.153 | 23  | 0.0201  | 2.1 |  |  |  | 417  | 500  |  |  | 128.3 | 2.7 |  |  |
| zj28-1.7  | 63  | 141 | 0.46 | 0.062  | 43  | 0.174 | 44  | 0.02053 | 4   |  |  |  | 662  | 930  |  |  | 131   | 5.3 |  |  |
| zj28-1.8  | 320 | 271 | 1.22 | 0.056  | 28  | 0.162 | 28  | 0.02112 | 2.5 |  |  |  | 435  | 620  |  |  | 134.7 | 3.4 |  |  |
| zj28-1.9  | 239 | 298 | 0.83 | 0.032  | 56  | 0.09  | 55  | 0.02014 | 2.5 |  |  |  | -940 | 1600 |  |  | 128.5 | 3.2 |  |  |
| zj28-1.10 | 162 | 129 | 1.29 | 0.079  | 36  | 0.207 | 36  | 0.019   | 3.7 |  |  |  | 1174 | 710  |  |  | 121.3 | 4.6 |  |  |
| zj28-1.11 | 213 | 196 | 1.12 | 0.028  | 84  | 0.08  | 84  | 0.02051 | 3.2 |  |  |  | -134 | 2700 |  |  | 130.9 | 4.2 |  |  |
| zj28-1.12 | 277 | 313 | 0.92 | 0.0765 | 8.8 | 0.216 | 9   | 0.0205  | 1.8 |  |  |  | 1107 | 180  |  |  | 130.8 | 2.4 |  |  |
| zj28-1.13 | 258 | 208 | 1.28 | 0.061  | 40  | 0.162 | 40  | 0.01919 | 3.2 |  |  |  | 652  | 850  |  |  | 122.5 | 3.9 |  |  |
| zj28-1.14 | 293 | 360 | 0.84 | 0.067  | 17  | 0.192 | 17  | 0.02088 | 2.1 |  |  |  | 828  | 360  |  |  | 133.2 | 2.8 |  |  |

M2, central Shengzhou basin (Li JH et al., 2014)

|               |      |      |      |        |     |         |         |         |         |  |  |  |      |      |  |  |       |      |  |  |
|---------------|------|------|------|--------|-----|---------|---------|---------|---------|--|--|--|------|------|--|--|-------|------|--|--|
| zj30-1.1      | 367  | 213  | 1.78 | 0.053  | 46  | 0.135   | 46      | 0.01831 | 3.3     |  |  |  | 340  | 1000 |  |  | 117   | 3.9  |  |  |
| zj30-1.2      | 102  | 82   | 1.28 | 0.113  | 1   | 0.301   | 18      | 0.01937 | 4.1     |  |  |  | 1845 | 320  |  |  | 123.6 | 5.1  |  |  |
| zj30-1.3      | 92   | 204  | 0.47 | 0.0765 | 2.4 | 2.08    | 2.9     | 0.1971  | 1.6     |  |  |  | 1109 | 48   |  |  | 1160  | 17.0 |  |  |
| zj30-1.4      | 96   | 83   | 1.19 | 0.076  | 84  | 0.2     | 85      | 0.0192  | 8       |  |  |  | 1090 | 170  |  |  | 122.6 | 10.0 |  |  |
| zj30-1.5      | 229  | 139  | 1.7  | 0.095  | 23  | 0.248   | 23      | 0.01896 | 3.4     |  |  |  | 1529 | 440  |  |  | 121.1 | 4.1  |  |  |
| zj30-1.6      | 111  | 90   | 1.27 | 0.046  | 86  | 0.12    | 86      | 0.01908 | 4.5     |  |  |  | 20   | 2100 |  |  | 121.8 | 5.6  |  |  |
| zj30-1.7      | 188  | 162  | 1.2  | 0.088  | 16  | 0.252   | 16      | 0.02083 | 2.2     |  |  |  | 1375 | 300  |  |  | 132.9 | 3.0  |  |  |
| zj30-1.8      | 94   | 73   | 1.32 | 330    | 27  | 0.0182  | 7.4     | 116.1   | 8.8     |  |  |  |      |      |  |  |       |      |  |  |
| zj30-1.9      | 129  | 100  | 1.34 |        |     | 0.0181  | 6.3     | 115.6   | 7.3     |  |  |  |      |      |  |  |       |      |  |  |
| zj30-1.10     | 181  | 132  | 1.41 | 0.068  | 21  | 0.176   | 21      | 0.01877 | 2.5     |  |  |  | 863  | 440  |  |  | 119.9 | 2.9  |  |  |
| zj30-1.11     | 164  | 109  | 1.55 | 0.071  | 62  | 0.18    | 62      | 0.0182  | 5.7     |  |  |  | 950  | 1300 |  |  | 116.2 | 6.7  |  |  |
| zj30-1.12     | 94   | 80   | 1.22 | 0.077  | 60  | 0.2     | 60      | 0.0192  | 6.2     |  |  |  | 1130 | 1200 |  |  | 122.8 | 7.8  |  |  |
| zj30-1.13     | 262  | 273  | 0.99 | 0.06   | 18  | 0.169   | 18      | 0.02024 | 2.1     |  |  |  | 621  | 380  |  |  | 129.2 | 2.7  |  |  |
|               |      |      |      |        |     |         |         |         |         |  |  |  |      |      |  |  |       |      |  |  |
| DY11-130-1-1  | 405  | 337  | 1.20 |        |     | 0.14431 | 0.00177 | 0.02067 | 0.00016 |  |  |  |      |      |  |  | 132   | 1.0  |  |  |
| DY11-130-1-2  | 659  | 397  | 1.66 |        |     | 0.13908 | 0.00187 | 0.02049 | 0.00021 |  |  |  |      |      |  |  | 131   | 1.3  |  |  |
| DY11-130-1-3  | 337  | 210  | 1.60 |        |     | 0.14767 | 0.00286 | 0.02122 | 0.00024 |  |  |  |      |      |  |  | 135   | 1.5  |  |  |
| DY11-130-1-4  | 243  | 163  | 1.48 |        |     | 0.14591 | 0.00248 | 0.02081 | 0.00022 |  |  |  |      |      |  |  | 133   | 1.4  |  |  |
| DY11-130-1-5  | 1161 | 1056 | 1.10 |        |     | 0.16176 | 0.00229 | 0.02081 | 0.00026 |  |  |  |      |      |  |  | 133   | 1.6  |  |  |
| DY11-130-1-6  | 295  | 320  | 0.92 |        |     | 0.14497 | 0.00177 | 0.02089 | 0.00019 |  |  |  |      |      |  |  | 133   | 1.2  |  |  |
| DY11-130-1-7  | 206  | 181  | 1.14 |        |     | 0.14175 | 0.00639 | 0.02062 | 0.00055 |  |  |  |      |      |  |  | 132   | 3.5  |  |  |
| DY11-130-1-8  | 183  | 129  | 1.42 |        |     | 0.14337 | 0.00269 | 0.02106 | 0.00025 |  |  |  |      |      |  |  | 134   | 1.6  |  |  |
| DY11-130-1-9  | 129  | 128  | 1.00 |        |     | 0.14451 | 0.00451 | 0.02067 | 0.00050 |  |  |  |      |      |  |  | 132   | 3.2  |  |  |
| DY11-130-1-10 | 142  | 106  | 1.35 |        |     | 0.17025 | 0.00367 | 0.02041 | 0.00023 |  |  |  |      |      |  |  | 130   | 1.4  |  |  |
| DY11-130-1-11 | 129  | 161  | 0.81 |        |     | 0.21860 | 0.01538 | 0.02101 | 0.00036 |  |  |  |      |      |  |  | 134   | 2.3  |  |  |
| DY11-130-1-12 | 331  | 399  | 0.83 |        |     | 0.13775 | 0.00347 | 0.02079 | 0.00042 |  |  |  |      |      |  |  | 133   | 2.6  |  |  |
| DY11-130-1-13 | 301  | 239  | 1.26 |        |     | 0.14261 | 0.00271 | 0.02063 | 0.00032 |  |  |  |      |      |  |  | 132   | 2.0  |  |  |
| DY11-130-1-14 | 218  | 234  | 0.93 |        |     | 0.14650 | 0.00453 | 0.02090 | 0.00036 |  |  |  |      |      |  |  | 133   | 2.3  |  |  |
| DY11-130-1-15 | 286  | 295  | 0.97 |        |     | 0.13717 | 0.00294 | 0.02036 | 0.00030 |  |  |  |      |      |  |  | 130   | 1.9  |  |  |
| DY11-130-1-16 | 526  | 998  | 0.53 |        |     | 0.14440 | 0.00587 | 0.02089 | 0.00052 |  |  |  |      |      |  |  | 133   | 3.3  |  |  |
| DY11-130-1-17 | 149  | 154  | 0.97 |        |     | 0.15283 | 0.00401 | 0.02159 | 0.00032 |  |  |  |      |      |  |  | 138   | 2.0  |  |  |
| DY11-130-1-18 | 155  | 128  | 1.21 |        |     | 0.15125 | 0.00439 | 0.02135 | 0.00035 |  |  |  |      |      |  |  | 136   | 2.2  |  |  |
| DY11-130-1-19 | 712  | 401  | 1.78 |        |     | 0.14256 | 0.00455 | 0.02089 | 0.00046 |  |  |  |      |      |  |  | 133   | 2.9  |  |  |
| DY11-130-1-20 | 123  | 152  | 0.81 |        |     | 0.14938 | 0.00364 | 0.02117 | 0.00034 |  |  |  |      |      |  |  | 135   | 2.1  |  |  |
|               |      |      |      |        |     |         |         |         |         |  |  |  |      |      |  |  |       |      |  |  |
| DY11-132-1-1  | 132  | 168  | 0.78 |        |     | 0.13887 | 0.00264 | 0.02011 | 0.00022 |  |  |  |      |      |  |  | 128   | 1.4  |  |  |
| DY11-132-1-2  | 132  | 148  | 0.89 |        |     | 0.13936 | 0.00308 | 0.02011 | 0.00026 |  |  |  |      |      |  |  | 128   | 1.6  |  |  |
| DY11-132-1-3  | 119  | 126  | 0.94 |        |     | 0.13467 | 0.00690 | 0.02080 | 0.00024 |  |  |  |      |      |  |  | 133   | 1.5  |  |  |
| DY11-132-1-4  | 182  | 181  | 1.00 |        |     | 0.14471 | 0.00285 | 0.02060 | 0.00015 |  |  |  |      |      |  |  | 131   | 1.0  |  |  |
| DY11-132-1-5  | 104  | 131  | 0.79 |        |     | 0.14594 | 0.00396 | 0.02090 | 0.00028 |  |  |  |      |      |  |  | 133   | 1.8  |  |  |
| DY11-132-1-6  | 102  | 114  | 0.89 |        |     | 0.14363 | 0.00319 | 0.02056 | 0.00017 |  |  |  |      |      |  |  | 131   | 1.1  |  |  |
| DY11-132-1-7  | 150  | 167  | 0.90 |        |     | 0.14003 | 0.00874 | 0.02044 | 0.00036 |  |  |  |      |      |  |  | 130   | 2.3  |  |  |
| DY11-132-1-8  | 162  | 153  | 1.06 |        |     | 0.14120 | 0.00213 | 0.02079 | 0.00013 |  |  |  |      |      |  |  | 133   | 0.8  |  |  |
| DY11-132-1-9  | 125  | 170  | 0.73 |        |     | 0.15213 | 0.00274 | 0.02063 | 0.00014 |  |  |  |      |      |  |  | 132   | 0.9  |  |  |
| DY11-132-1-10 | 154  | 144  | 1.07 |        |     | 0.14258 | 0.00197 | 0.02080 | 0.00013 |  |  |  |      |      |  |  | 133   | 0.9  |  |  |
| DY11-132-1-11 | 826  | 603  | 1.37 |        |     | 0.14052 | 0.00108 | 0.02039 | 0.00012 |  |  |  |      |      |  |  | 130   | 0.8  |  |  |
| DY11-132-1-12 | 78   | 92   | 0.84 |        |     | 0.14296 | 0.00303 | 0.02077 | 0.00018 |  |  |  |      |      |  |  | 133   | 1.1  |  |  |
| DY11-132-1-13 | 198  | 165  | 1.20 |        |     | 0.13645 | 0.00396 | 0.02060 | 0.00017 |  |  |  |      |      |  |  | 131   | 1.1  |  |  |
| DY11-132-1-14 | 667  | 386  | 1.73 |        |     | 0.13695 | 0.00280 | 0.02033 | 0.00017 |  |  |  |      |      |  |  | 130   | 1.1  |  |  |
| DY11-132-1-15 | 156  | 133  | 1.17 |        |     | 0.13830 | 0.00179 | 0.01977 | 0.00013 |  |  |  |      |      |  |  | 126   | 0.8  |  |  |
| DY11-132-1-16 | 291  | 236  | 1.23 |        |     | 0.14068 | 0.00277 | 0.02037 | 0.00018 |  |  |  |      |      |  |  | 130   | 1.1  |  |  |
| DY11-132-1-17 | 282  | 208  | 1.35 |        |     | 0.14139 | 0.00160 | 0.02073 | 0.00013 |  |  |  |      |      |  |  | 132   | 0.8  |  |  |
| DY11-132-1-18 | 258  | 179  | 1.44 |        |     | 0.14029 | 0.00201 | 0.02048 | 0.00013 |  |  |  |      |      |  |  | 131   | 0.8  |  |  |



|                          |                |                |                 |                    |                    |                    |                    |                |                |
|--------------------------|----------------|----------------|-----------------|--------------------|--------------------|--------------------|--------------------|----------------|----------------|
| DY11-132-1-19            | 538            | 378            | 1.42            | 0.14525            | 0.00126            | 0.02076            | 0.00013            | 132            | 0.8            |
| <del>DY11-132-1-20</del> | <del>79</del>  | <del>94</del>  | <del>0.84</del> | <del>0.13660</del> | <del>0.00427</del> | <del>0.01986</del> | <del>0.00020</del> | <del>127</del> | <del>1.3</del> |
| DY11-133-1-1             | 86             | 120            | 0.72            | 0.13609            | 0.00193            | 0.02031            | 0.00025            | 130            | 1.6            |
| DY11-133-1-2             | 29             | 50             | 0.59            | 0.14187            | 0.00513            | 0.02062            | 0.00052            | 132            | 3.3            |
| DY11-133-1-3             | 29             | 69             | 0.43            | 0.14455            | 0.00359            | 0.02071            | 0.00038            | 132            | 2.4            |
| DY11-133-1-4             | 79             | 110            | 0.72            | 0.13398            | 0.00338            | 0.01973            | 0.00032            | 126            | 2.0            |
| DY11-133-1-5             | 46             | 67             | 0.69            | 0.13535            | 0.00396            | 0.02042            | 0.00036            | 130            | 2.3            |
| <del>DY11-133-1-6</del>  | <del>49</del>  | <del>36</del>  | <del>0.52</del> | <del>0.13886</del> | <del>0.00611</del> | <del>0.01888</del> | <del>0.00037</del> | <del>121</del> | <del>2.3</del> |
| DY11-133-1-7             | 33             | 67             | 0.49            | 0.13675            | 0.00641            | 0.01988            | 0.00043            | 127            | 2.7            |
| <del>DY11-133-1-8</del>  | <del>80</del>  | <del>108</del> | <del>0.74</del> | <del>0.17412</del> | <del>0.00478</del> | <del>0.01990</del> | <del>0.00022</del> | <del>127</del> | <del>1.4</del> |
| DY11-133-1-9             | 62             | 90             | 0.69            | 0.14079            | 0.00472            | 0.02040            | 0.00043            | 130            | 2.7            |
| DY11-133-1-10            | 64             | 86             | 0.75            | 0.14989            | 0.00500            | 0.02115            | 0.00064            | 135            | 4.0            |
| DY11-133-1-11            | 68             | 82             | 0.83            | 0.13402            | 0.00383            | 0.02031            | 0.00037            | 130            | 2.3            |
| DY11-133-1-12            | 35             | 50             | 0.71            | 0.15109            | 0.01529            | 0.02150            | 0.00078            | 137            | 5.0            |
| <del>DY11-133-1-13</del> | <del>150</del> | <del>154</del> | <del>0.98</del> | <del>0.37442</del> | <del>0.01156</del> | <del>0.02146</del> | <del>0.00024</del> | <del>137</del> | <del>1.5</del> |
| DY11-133-1-14            | 39             | 51             | 0.76            | 0.15106            | 0.00561            | 0.02103            | 0.00034            | 134            | 2.2            |
| DY11-133-1-15            | 101            | 111            | 0.91            | 0.14373            | 0.00224            | 0.02087            | 0.00024            | 133            | 1.5            |
| DY11-133-1-16            | 22             | 52             | 0.42            | 0.14660            | 0.00834            | 0.02120            | 0.00088            | 135            | 5.5            |
| DY11-133-1-17            | 51             | 67             | 0.77            | 0.14104            | 0.00327            | 0.02093            | 0.00025            | 134            | 1.6            |
| <del>DY11-133-1-18</del> | <del>141</del> | <del>162</del> | <del>0.87</del> | <del>0.13442</del> | <del>0.00266</del> | <del>0.01944</del> | <del>0.00029</del> | <del>124</del> | <del>1.8</del> |
| DY11-133-1-19            | 87             | 118            | 0.74            | 0.13766            | 0.00308            | 0.02068            | 0.00029            | 132            | 1.8            |
| DY11-133-1-20            | 107            | 107            | 1.01            | 0.14199            | 0.00223            | 0.02090            | 0.00022            | 133            | 1.4            |

|                                       |      |      |      |       |    |         |         |         |         |      |      |       |      |
|---------------------------------------|------|------|------|-------|----|---------|---------|---------|---------|------|------|-------|------|
| [12], W. Han and L. Shi et al., 2014) |      |      |      |       |    |         |         |         |         |      |      |       |      |
| zj53-1.1                              | 32   | 23   | 1.4  |       |    |         | 0.0201  | 47      |         | 270  | 6300 | 127.4 | 7.0  |
| zj53-1.2                              | 45   | 29   | 1.62 | 0.201 | 20 | 0.65    | 21      | 0.0232  | 6.5     | 2840 | 330  | 120.2 | 5.0  |
| zj53-1.3                              | 22   | 15   | 1.56 | 0.29  | 35 | 0.95    | 40      | 0.0234  | 18      | 3439 | 550  | 114   | 6.7  |
| zj53-1.4                              | 37   | 28   | 1.37 |       |    |         | 0.0179  | 9       |         |      |      | 120.4 | 4.5  |
| zj53-1.5                              | 17   | 14   | 1.28 | 0.263 | 10 | 0.842   | 12      | 0.0232  | 5.8     | 3267 | 160  | 108.4 | 5.9  |
| zj53-1.6                              | 26   | 20   | 1.37 | 0.137 | 56 | 0.4     | 57      | 0.0214  | 11      | 2190 | 980  | 121.4 | 6.1  |
| zj53-1.7                              | 40   | 9    | 1.24 |       |    |         | 0.0153  | 32      |         |      |      | 129   | 10.0 |
| zj53-1.8                              | 47   | 32   | 1.5  |       |    |         | 0.0174  | 7.3     |         |      |      | 113.6 | 4.9  |
| zj53-1.9                              | 35   | 24   | 1.51 | 0.108 | 27 | 0.303   | 27      | 0.02031 | 3.6     | 1769 | 490  | 120   | 6.4  |
| zj53-1.10                             | 64   | 27   | 2.4  |       |    |         | 0.0173  | 16      |         |      |      | 104.7 | 5.7  |
| zj53-1.11                             | 23   | 20   | 1.2  | 0.127 | 34 | 0.38    | 35      | 0.0216  | 6.1     | 2058 | 610  | 124.1 | 6.9  |
|                                       |      |      |      |       |    |         |         |         |         |      |      |       |      |
| DY11-10-2-1                           | 473  | 277  | 1.71 |       |    | 0.13421 | 0.00313 | 0.01999 | 0.00044 |      |      | 128   | 2.8  |
| DY11-10-2-2                           | 876  | 625  | 1.40 |       |    | 0.14529 | 0.00232 | 0.01999 | 0.00029 |      |      | 128   | 1.8  |
| DY11-10-2-3                           | 829  | 662  | 1.25 |       |    | 0.15699 | 0.00112 | 0.02007 | 0.00013 |      |      | 128   | 0.8  |
| DY11-10-2-4                           | 1282 | 731  | 1.75 |       |    | 0.17297 | 0.00272 | 0.02058 | 0.00016 |      |      | 131   | 1.0  |
| DY11-10-2-5                           | 415  | 351  | 1.18 |       |    | 0.13757 | 0.00139 | 0.02030 | 0.00015 |      |      | 130   | 1.0  |
| DY11-10-2-6                           | 1118 | 648  | 1.73 |       |    | 0.13797 | 0.00144 | 0.02001 | 0.00017 |      |      | 128   | 1.1  |
| DY11-10-2-7                           | 2404 | 1335 | 1.80 |       |    | 0.14910 | 0.00317 | 0.02010 | 0.00039 |      |      | 128   | 2.5  |
| DY11-10-2-8                           | 368  | 358  | 1.03 |       |    | 0.13823 | 0.00170 | 0.02010 | 0.00016 |      |      | 128   | 1.0  |
| DY11-10-2-9                           | 409  | 340  | 1.20 |       |    | 0.13520 | 0.00180 | 0.02014 | 0.00021 |      |      | 129   | 1.3  |
| DY11-10-2-10                          | 747  | 412  | 1.81 |       |    | 0.14598 | 0.00373 | 0.02028 | 0.00037 |      |      | 129   | 2.3  |
| DY11-10-2-11                          | 293  | 283  | 1.04 |       |    | 0.14100 | 0.00408 | 0.01999 | 0.00031 |      |      | 128   | 1.9  |
| DY11-10-2-12                          | 416  | 405  | 1.03 |       |    | 0.14321 | 0.00218 | 0.01991 | 0.00020 |      |      | 127   | 1.2  |
| DY11-10-2-13                          | 601  | 468  | 1.28 |       |    | 0.19907 | 0.01340 | 0.02001 | 0.00055 |      |      | 128   | 3.5  |
| DY11-10-2-14                          | 995  | 568  | 1.75 |       |    | 0.14876 | 0.00421 | 0.02018 | 0.00047 |      |      | 129   | 2.9  |
| DY11-10-2-15                          | 859  | 636  | 1.35 |       |    | 0.13967 | 0.00136 | 0.02025 | 0.00015 |      |      | 129   | 1.0  |
| DY11-10-2-16                          | 633  | 456  | 1.39 |       |    | 0.14070 | 0.00122 | 0.02037 | 0.00015 |      |      | 130   | 1.0  |
| DY11-10-2-17                          | 798  | 607  | 1.31 |       |    | 9.72652 | 0.32887 | 0.10235 | 0.00297 |      |      | 628   | 17.3 |
| DY11-10-2-18                          | 197  | 183  | 1.07 |       |    | 0.13311 | 0.00334 | 0.02012 | 0.00019 |      |      | 128   | 1.2  |
| DY11-10-2-19                          | 243  | 204  | 1.19 |       |    | 0.14959 | 0.01225 | 0.02025 | 0.00101 |      |      | 129   | 6.4  |
| DY11-10-2-20                          | 500  | 446  | 1.12 |       |    | 0.23573 | 0.00325 | 0.02080 | 0.00016 |      |      | 133   | 1.0  |

| Table 1: Comparison of the proposed method with existing methods (using 10000 samples) |    |      |      |      |         |        |         |        |         |        |      |       |      |
|----------------------------------------------------------------------------------------|----|------|------|------|---------|--------|---------|--------|---------|--------|------|-------|------|
| XC06                                                                                   | 1  | 445  | 305  | 1.46 | 0.04180 | 0.0072 | 0.11100 | 0.0082 | 0.01930 | 0.0039 | 0.47 | 123.1 | 4.7  |
|                                                                                        | 2  | 274  | 304  | 0.90 | 0.04040 | 0.0105 | 0.12030 | 0.0112 | 0.02160 | 0.0039 | 0.35 | 137.6 | 5.3  |
|                                                                                        | 3  | 176  | 173  | 1.01 | 0.05050 | 0.008  | 0.13720 | 0.0099 | 0.01970 | 0.0059 | 0.59 | 125.7 | 7.3  |
|                                                                                        | 4  | 140  | 205  | 0.68 | 0.04280 | 0.0096 | 0.11580 | 0.0103 | 0.01960 | 0.0039 | 0.38 | 125.2 | 4.8  |
|                                                                                        | 5  | 162  | 157  | 1.03 | 0.02270 | 0.0392 | 0.05920 | 0.0397 | 0.01890 | 0.0063 | 0.16 | 120.8 | 7.5  |
|                                                                                        | 6  | 138  | 147  | 0.94 | 0.03180 | 0.0335 | 0.08770 | 0.0337 | 0.02000 | 0.0041 | 0.12 | 127.6 | 5.1  |
|                                                                                        | 7  | 332  | 340  | 0.98 | 0.04420 | 0.0058 | 0.12110 | 0.007  | 0.01990 | 0.0039 | 0.56 | 127   | 4.9  |
|                                                                                        | 8  | 392  | 326  | 1.20 | 0.04230 | 0.0079 | 0.11700 | 0.0088 | 0.02000 | 0.0039 | 0.44 | 127.9 | 4.9  |
|                                                                                        | 9  | 1092 | 1207 | 0.90 | 0.04760 | 0.0027 | 0.13400 | 0.0093 | 0.02040 | 0.0089 | 0.96 | 130.4 | 11.5 |
|                                                                                        | 10 | 237  | 206  | 1.15 | 0.04550 | 0.0065 | 0.12380 | 0.0075 | 0.01970 | 0.0039 | 0.51 | 125.9 | 4.8  |
|                                                                                        | 11 | 502  | 342  | 1.47 | 0.03650 | 0.0115 | 0.09840 | 0.0121 | 0.01960 | 0.0039 | 0.32 | 125   | 4.8  |
|                                                                                        | 12 | 408  | 362  | 1.13 | 0.04870 | 0.0054 | 0.13130 | 0.0067 | 0.01960 | 0.0039 | 0.58 | 124.9 | 4.8  |
|                                                                                        | 13 | 335  | 657  | 0.51 | 0.04840 | 0.0031 | 0.13350 | 0.005  | 0.02000 | 0.0038 | 0.77 | 127.7 | 4.8  |
|                                                                                        | 14 | 130  | 155  | 0.84 | 0.04780 | 0.0091 | 0.12870 | 0.0111 | 0.01950 | 0.0064 | 0.57 | 124.6 | 7.8  |
|                                                                                        | 15 | 610  | 832  | 0.73 | 0.04630 | 0.004  | 0.12840 | 0.0055 | 0.02010 | 0.0038 | 0.70 | 128.4 | 4.9  |
|                                                                                        | 16 | 654  | 547  | 1.20 | 0.04380 | 0.0072 | 0.11630 | 0.0085 | 0.01920 | 0.0044 | 0.52 | 122.9 | 5.4  |
|                                                                                        | 17 | 340  | 214  | 1.59 | 0.04430 | 0.0115 | 0.11870 | 0.0121 | 0.01950 | 0.0039 | 0.32 | 124.2 | 4.8  |
|                                                                                        | 18 | 198  | 166  | 1.19 | 0.04910 | 0.0077 | 0.13790 | 0.0087 | 0.02040 | 0.0039 | 0.45 | 129.9 | 5.1  |
| XC07                                                                                   | 1  | 281  | 240  | 1.17 | 0.04900 | 0.0077 | 0.12650 | 0.0087 | 0.01870 | 0.0039 | 0.50 | 119.6 | 4.7  |
|                                                                                        | 2  | 189  | 225  | 0.84 | 0.04450 | 0.0071 | 0.11050 | 0.0081 | 0.01800 | 0.0039 | 0.50 | 115   | 4.4  |
|                                                                                        | 3  | 75   | 87   | 0.86 | 0.02800 | 0.0253 | 0.06980 | 0.0256 | 0.01810 | 0.004  | 0.20 | 115.4 | 4.6  |
|                                                                                        | 4  | 136  | 173  | 0.79 | 0.02820 | 0.0234 | 0.07100 | 0.0238 | 0.01830 | 0.0039 | 0.20 | 116.7 | 4.6  |



|        |    |     |     |      |         |        |         |        |         |        |      |       |      |
|--------|----|-----|-----|------|---------|--------|---------|--------|---------|--------|------|-------|------|
| FQ03-1 | 5  | 407 | 349 | 1.17 | 0.05970 | 0.0195 | 0.15550 | 0.0199 | 0.01890 | 0.0041 | 0.20 | 120.7 | 4.9  |
|        | 6  | 108 | 125 | 0.86 | 0.05140 | 0.009  | 0.13120 | 0.0098 | 0.01850 | 0.0039 | 0.40 | 118.4 | 4.6  |
|        | 7  | 228 | 149 | 1.53 | 0.04180 | 0.0103 | 0.10720 | 0.011  | 0.01860 | 0.0039 | 0.40 | 118.8 | 4.6  |
|        | 8  | 95  | 123 | 0.77 | 0.03740 | 0.0166 | 0.09280 | 0.0171 | 0.01800 | 0.004  | 0.20 | 114.8 | 4.5  |
|        | 9  | 143 | 116 | 1.23 | 0.03300 | 0.0252 | 0.07830 | 0.0255 | 0.01720 | 0.0041 | 0.20 | 109.9 | 4.5  |
|        | 10 | 513 | 403 | 1.27 | 0.05320 | 0.0051 | 0.13410 | 0.0064 | 0.01830 | 0.0039 | 0.60 | 116.7 | 4.5  |
|        | 11 | 128 | 147 | 0.87 | 0.04890 | 0.0101 | 0.12540 | 0.0108 | 0.01860 | 0.0039 | 0.40 | 118.9 | 4.6  |
|        | 12 | 46  | 70  | 0.66 | 0.04020 | 0.0203 | 0.09870 | 0.0207 | 0.01780 | 0.0041 | 0.20 | 113.8 | 4.6  |
|        | 13 | 121 | 132 | 0.92 | 0.05170 | 0.0111 | 0.13160 | 0.0135 | 0.01850 | 0.0077 | 0.60 | 118   | 9.0  |
|        | 14 | 386 | 262 | 1.47 | 0.04940 | 0.0058 | 0.12990 | 0.007  | 0.01910 | 0.0039 | 0.60 | 121.8 | 4.7  |
|        | 15 | 259 | 272 | 0.95 | 0.03190 | 0.0187 | 0.07870 | 0.0191 | 0.01790 | 0.0039 | 0.20 | 114.4 | 4.4  |
|        | 16 | 217 | 191 | 1.14 | 0.04820 | 0.0137 | 0.11950 | 0.0143 | 0.01800 | 0.0039 | 0.30 | 114.9 | 4.5  |
|        | 1  | N/A | N/A | N/A  | N/A     | N/A    | N/A     | N/A    | N/A     | N/A    | N/A  | N/A   | N/A  |
|        | 2  | 363 | 230 | 1.58 | 0.03500 | 0.0245 | 0.10530 | 0.0248 | 0.02180 | 0.004  | 0.20 | 139.2 | 5.5  |
|        | 3  | 279 | 163 | 1.71 | 0.03530 | 0.017  | 0.08570 | 0.0174 | 0.01760 | 0.0039 | 0.20 | 112.5 | 4.4  |
|        | 4  | 398 | 208 | 1.91 | 0.03560 | 0.0163 | 0.08970 | 0.0176 | 0.01830 | 0.0064 | 0.40 | 116.7 | 7.4  |
|        | 5  | 196 | 134 | 1.46 | 0.03810 | 0.0176 | 0.10210 | 0.018  | 0.01950 | 0.004  | 0.20 | 124.3 | 4.9  |
|        | 6  | 171 | 114 | 1.50 | 0.06490 | 0.0133 | 0.15890 | 0.014  | 0.01780 | 0.0041 | 0.30 | 113.6 | 4.6  |
|        | 7  | 134 | 130 | 1.03 | 0.03080 | 0.0876 | 0.07370 | 0.0877 | 0.01740 | 0.004  | 0.00 | 111   | 4.4  |
|        | 8  | 143 | 132 | 1.08 | 0.04620 | 0.0148 | 0.11390 | 0.0153 | 0.01790 | 0.004  | 0.30 | 114.2 | 4.5  |
|        | 9  | 95  | 105 | 0.90 | 0.04600 | 0.0141 | 0.11710 | 0.0147 | 0.01840 | 0.004  | 0.30 | 117.8 | 4.6  |
|        | 10 | 137 | 107 | 1.28 | 0.03130 | 0.03   | 0.07590 | 0.0303 | 0.01760 | 0.0041 | 0.10 | 112.2 | 4.5  |
|        | 11 | 119 | 138 | 0.86 | 0.03040 | 0.0261 | 0.07480 | 0.0264 | 0.01790 | 0.004  | 0.20 | 114.2 | 4.5  |
|        | 12 | 132 | 147 | 0.90 | 0.06040 | 0.0113 | 0.14720 | 0.012  | 0.01770 | 0.004  | 0.30 | 112.9 | 4.4  |
|        | 13 | 216 | 152 | 1.42 | 0.05630 | 0.0101 | 0.13860 | 0.0116 | 0.01790 | 0.0056 | 0.50 | 114.1 | 6.4  |
|        | 14 | 172 | 199 | 0.86 | 0.04690 | 0.0146 | 0.11860 | 0.0151 | 0.01840 | 0.0039 | 0.30 | 117.3 | 4.6  |
|        | 15 | 121 | 99  | 1.22 | 0.43410 | 0.0588 | 1.83900 | 0.0676 | 0.03070 | 0.0333 | 0.50 | 195.1 | 64.0 |
|        | 16 | 337 | 369 | 0.91 | 0.04770 | 0.015  | 0.10990 | 0.0155 | 0.01670 | 0.0039 | 0.30 | 106.8 | 4.2  |
|        | 17 | 233 | 297 | 0.78 | 0.05490 | 0.0057 | 0.15680 | 0.0069 | 0.02070 | 0.0039 | 0.60 | 132.2 | 5.1  |
|        | 18 | 226 | 154 | 1.47 | 0.03930 | 0.0082 | 0.10320 | 0.0091 | 0.01900 | 0.0039 | 0.40 | 121.5 | 4.7  |
|        | 19 | 203 | 281 | 0.72 | 0.02530 | 0.0236 | 0.07370 | 0.0239 | 0.02110 | 0.0039 | 0.20 | 134.7 | 5.2  |
|        | 20 | 285 | 199 | 1.43 | 0.05740 | 0.0092 | 0.14110 | 0.01   | 0.01780 | 0.0039 | 0.40 | 114   | 4.4  |
|        | 21 | 113 | 117 | 0.97 | 0.02280 | 0.047  | 0.05410 | 0.0472 | 0.01720 | 0.0041 | 0.10 | 110   | 4.5  |
|        | 22 | 171 | 165 | 1.04 | 0.06100 | 0.0103 | 0.15680 | 0.011  | 0.01870 | 0.0039 | 0.40 | 119.1 | 4.6  |
|        | 23 | 166 | 162 | 1.02 | 0.03280 | 0.0219 | 0.08160 | 0.0223 | 0.01800 | 0.004  | 0.20 | 115.3 | 4.6  |
|        | 24 | 168 | 134 | 1.25 | 0.02480 | 0.0428 | 0.05970 | 0.043  | 0.01740 | 0.0041 | 0.10 | 111.4 | 4.5  |
|        | 25 | 41  | 82  | 0.50 | 0.05530 | 0.013  | 0.13700 | 0.0136 | 0.01800 | 0.004  | 0.30 | 114.8 | 4.6  |
|        | 26 | 112 | 97  | 1.15 | 0.04520 | 0.061  | 0.11520 | 0.0611 | 0.01850 | 0.0039 | 0.10 | 118   | 4.6  |
|        | 27 | 157 | 152 | 1.03 | 0.02890 | 0.029  | 0.07200 | 0.0293 | 0.01810 | 0.004  | 0.10 | 115.7 | 4.6  |
|        | 28 | 200 | 144 | 1.39 | 0.07910 | 0.0118 | 0.23000 | 0.0125 | 0.02110 | 0.0041 | 0.30 | 134.5 | 5.5  |
|        | 29 | 224 | 169 | 1.33 | 0.04150 | 0.0097 | 0.10460 | 0.0105 | 0.01830 | 0.0039 | 0.40 | 116.7 | 4.5  |
|        | 30 | 90  | 100 | 0.90 | 0.02320 | 0.047  | 0.06520 | 0.0472 | 0.02040 | 0.0041 | 0.10 | 130.3 | 5.3  |
|        | 31 | 143 | 140 | 1.02 | 0.03650 | 0.0201 | 0.09480 | 0.0205 | 0.01880 | 0.004  | 0.20 | 120.4 | 4.7  |
|        | 32 | 129 | 140 | 0.92 | 0.04130 | 0.0432 | 0.10560 | 0.0441 | 0.01850 | 0.0087 | 0.20 | 118.3 | 10.2 |
|        | 33 | 134 | 132 | 1.02 | 0.05980 | 0.0124 | 0.15230 | 0.013  | 0.01850 | 0.004  | 0.30 | 118   | 4.7  |
|        | 34 | 479 | 279 | 1.72 | 0.04910 | 0.0058 | 0.12970 | 0.0069 | 0.01920 | 0.0039 | 0.60 | 122.4 | 4.7  |
|        | 35 | 108 | 104 | 1.04 | 0.03690 | 0.0306 | 0.09570 | 0.0308 | 0.01880 | 0.0041 | 0.10 | 120.1 | 4.9  |
|        | 36 | 342 | 206 | 1.66 | 0.03620 | 0.0151 | 0.10220 | 0.0156 | 0.02050 | 0.004  | 0.30 | 130.7 | 5.1  |
|        | 37 | 165 | 151 | 1.09 | 0.04570 | 0.0359 | 0.11640 | 0.0361 | 0.01850 | 0.0039 | 0.10 | 118.1 | 4.6  |
|        | 38 | 117 | 96  | 1.22 | 0.04000 | 0.0216 | 0.10330 | 0.022  | 0.01870 | 0.004  | 0.20 | 119.6 | 4.8  |
|        | 39 | 324 | 405 | 0.80 | 0.05070 | 0.0032 | 0.25080 | 0.005  | 0.03590 | 0.0038 | 0.80 | 227.1 | 8.6  |
| 09XC01 | 1  | 113 | 93  | 1.22 | 0.07210 | 0.0135 | 0.18370 | 0.0141 | 0.01850 | 0.004  | 0.30 | 117.9 | 4.7  |
| 2R     |    | 208 | 200 | 1.04 | 0.05330 | 0.0088 | 0.14620 | 0.0096 | 0.01990 | 0.0039 | 0.40 | 126.9 | 4.9  |
| 2c     |    | 178 | 152 | 1.17 | 0.06050 | 0.0075 | 0.17650 | 0.0085 | 0.02120 | 0.0039 | 0.50 | 134.9 | 5.3  |
|        | 3  | 211 | 189 | 1.12 | 0.04810 | 0.0096 | 0.12330 | 0.0104 | 0.01860 | 0.0039 | 0.40 | 118.8 | 4.6  |
|        | 4  | 288 | 197 | 1.46 | 0.04150 | 0.0122 | 0.10790 | 0.0128 | 0.01880 | 0.0039 | 0.30 | 120.3 | 4.7  |
|        | 5  | 249 | 197 | 1.26 | 0.05580 | 0.0107 | 0.14690 | 0.012  | 0.01910 | 0.0055 | 0.50 | 121.9 | 6.7  |
|        | 6  | 194 | 160 | 1.21 | 0.04410 | 0.011  | 0.11410 | 0.0117 | 0.01880 | 0.0039 | 0.30 | 119.9 | 4.6  |
|        | 7  | 190 | 206 | 0.92 | 0.05310 | 0.0057 | 0.14700 | 0.0069 | 0.02010 | 0.0039 | 0.60 | 128.3 | 4.9  |
|        | 8  | 284 | 223 | 1.27 | 0.04450 | 0.008  | 0.11170 | 0.0111 | 0.01820 | 0.0078 | 0.70 | 116.2 | 8.9  |
|        | 9  | 136 | 136 | 1.00 | 0.00480 | 0.2809 | 0.01180 | 0.2809 | 0.01780 | 0.0042 | 0.00 | 114   | 4.7  |
|        | 10 | 289 | 207 | 1.40 | 0.04350 | 0.016  | 0.11090 | 0.0165 | 0.01850 | 0.004  | 0.20 | 118.1 | 4.6  |
|        | 11 | N/A | N/A | N/A  | N/A     | N/A    | N/A     | N/A    | N/A     | N/A    | N/A  | N/A   | N/A  |
|        | 12 | N/A | N/A | N/A  | N/A     | N/A    | N/A     | N/A    | N/A     | N/A    | N/A  | N/A   | N/A  |
|        | 13 | 261 | 239 | 1.09 | 0.04340 | 0.011  | 0.12570 | 0.0116 | 0.02100 | 0.0039 | 0.30 | 134.1 | 5.2  |
|        | 14 | 254 | 304 | 0.84 | 0.04280 | 0.0255 | 0.10860 | 0.0258 | 0.01840 | 0.0039 | 0.20 | 117.6 | 4.5  |
|        | 15 | 192 | 154 | 1.25 | 0.05260 | 0.0379 | 0.13500 | 0.0381 | 0.01860 | 0.0039 | 0.10 | 118.9 | 4.6  |
|        | 16 | 100 | 99  | 1.01 | 0.05080 | 0.0077 | 0.15220 | 0.0087 | 0.02170 | 0.0039 | 0.50 | 138.5 | 5.4  |
|        | 17 | 151 | 139 | 1.09 | 0.03180 | 0.0243 | 0.08160 | 0.0246 | 0.01860 | 0.004  | 0.20 | 118.7 | 4.7  |
|        | 18 | 175 | 164 | 1.07 | 0.03900 | 0.0443 | 0.09930 | 0.0445 | 0.01850 | 0.004  | 0.10 | 118   | 4.7  |
|        | 19 | 153 | 159 | 0.96 | 0.05760 | 0.0075 | 0.15500 | 0.0085 | 0.01950 | 0.0039 | 0.50 | 124.6 | 4.8  |
|        | 20 | 77  | 95  | 0.81 | 0.02950 | 0.0347 | 0.07160 | 0.035  | 0.01760 | 0.0042 | 0.10 | 112.6 | 4.7  |
|        | 21 | 153 | 182 | 0.84 | 0.04220 | 0.0346 | 0.11130 | 0.0348 | 0.01910 | 0.0042 | 0.10 | 122.2 | 5.1  |
|        | 22 | 164 | 153 | 1.07 | 0.03830 | 0.0203 | 0.10900 | 0.0207 | 0.02070 | 0.004  | 0.20 | 131.8 | 5.2  |
|        | 23 | 157 | 153 | 1.03 | 0.03340 | 0.0258 | 0.08430 | 0.0261 | 0.01830 | 0.004  | 0.20 | 117   | 4.6  |
|        | 24 | 172 | 163 | 1.06 | 0.02900 | 0.0312 | 0.07400 | 0.0322 | 0.01850 | 0.0079 | 0.20 | 118.1 | 9.3  |
|        | 25 | 89  | 99  | 0.90 | 0.04520 | 0.0417 | 0.11520 | 0.0423 | 0.01850 | 0.0068 | 0.20 | 118   | 8.0  |
|        | 26 | 250 | 176 | 1.42 | 0.05600 | 0.0048 | 0.14600 | 0.0062 | 0.01890 | 0.0039 | 0.60 | 120.8 | 4.6  |
|        | 27 | 215 | 183 | 1.17 | 0.04580 | 0.0349 | 0.11920 | 0.0351 | 0.01890 | 0.0039 | 0.10 | 120.5 | 4.7  |
|        | 28 | 162 | 145 | 1.12 | 0.03730 | 0.019  | 0.09500 | 0.0194 | 0.01850 | 0.004  | 0.20 | 118   | 4.6  |
|        | 29 | 178 | 168 | 1.06 | 0.05140 | 0.0148 | 0.13330 | 0.0153 | 0.01880 | 0.004  | 0.30 | 120.3 | 4.7  |



|                                                           | 30   | 188 | 169  | 1.11    | 0.02960 | 0.0256  | 0.07350 | 0.0259  | 0.01800 | 0.00003 |         | 0.20 |      |     | 114.9 | 4.5   |      |      |      |     |     |
|-----------------------------------------------------------|------|-----|------|---------|---------|---------|---------|---------|---------|---------|---------|------|------|-----|-------|-------|------|------|------|-----|-----|
| M5, Dongyang (Li JH et al., 2014)                         |      |     |      |         |         |         |         |         |         |         |         |      |      |     |       |       |      |      |      |     |     |
| zj31-1.1                                                  | 855  | 967 | 0.91 | 0.0449  | 5.1     | 0.1347  | 5.2     | 0.02175 | 1.1     |         |         |      | -60  | 120 |       | 138.7 | 1.5  |      |      |     |     |
| zj31-1.2                                                  | 370  | 574 | 0.67 | 0.0506  | 3.4     | 0.1477  | 3.6     | 0.02118 | 1.1     |         |         |      | 221  | 79  |       | 135.1 | 1.5  |      |      |     |     |
| zj31-1.3                                                  | 210  | 216 | 1.01 | 0.054   | 12      | 0.157   | 12      | 0.02104 | 1.6     |         |         |      | 372  | 270 |       | 134.2 | 2.1  |      |      |     |     |
| zj31-1.4                                                  | 247  | 273 | 0.93 | 0.0424  | 17      | 0.122   | 17      | 0.02095 | 1.6     |         |         |      | -203 | 420 |       | 133.7 | 2.1  |      |      |     |     |
| zj31-1.5                                                  | 243  | 475 | 0.53 | 0.0403  | 9.6     | 0.117   | 9.6     | 0.0211  | 1.2     |         |         |      | -333 | 250 |       | 134.6 | 1.7  |      |      |     |     |
| zj31-1.6                                                  | 309  | 508 | 0.63 | 0.0449  | 11      | 0.129   | 11      | 0.02083 | 1.3     |         |         |      | -59  | 280 |       | 132.9 | 1.7  |      |      |     |     |
| zj31-1.7                                                  | 459  | 676 | 0.7  | 0.0471  | 8       | 0.138   | 8.1     | 0.02122 | 1.2     |         |         |      | 56   | 190 |       | 135.4 | 1.6  |      |      |     |     |
| zj31-1.8                                                  | 336  | 469 | 0.74 | 0.0481  | 8.3     | 0.142   | 8.4     | 0.02143 | 1.3     |         |         |      | 103  | 200 |       | 136.7 | 1.7  |      |      |     |     |
| zj31-1.9                                                  | 252  | 518 | 0.5  | 0.0466  | 15      | 0.14    | 15      | 0.02185 | 1.4     |         |         |      | 27   | 350 |       | 139.3 | 1.9  |      |      |     |     |
| zj31-1.10                                                 | 556  | 348 | 1.65 | 0.0457  | 8.1     | 0.224   | 8.2     | 0.0356  | 1.2     |         |         |      | -18  | 200 |       | 225.5 | 2.8  |      |      |     |     |
| zj31-1.11                                                 | 156  | 217 | 0.74 | 0.0532  | 12      | 0.155   | 12      | 0.02114 | 1.6     |         |         |      | 339  | 270 |       | 134.9 | 2.2  |      |      |     |     |
| zj31-1.12                                                 | 248  | 309 | 0.83 | 0.0454  | 16      | 0.135   | 16      | 0.0216  | 1.5     |         |         |      | -36  | 390 |       | 137.8 | 2.1  |      |      |     |     |
| zj31-1.13                                                 | 235  | 288 | 0.84 | 0.0495  | 10      | 0.143   | 10      | 0.02097 | 1.5     |         |         |      | 169  | 240 |       | 133.8 | 1.9  |      |      |     |     |
| zj31-1.14                                                 | 214  | 284 | 0.78 | 0.0402  | 21      | 0.118   | 21      | 0.02126 | 1.5     |         |         |      | -340 | 550 |       | 135.6 | 2.1  |      |      |     |     |
| M6, Yucaotou, Yiwu (Liu et al., 2012; Li CH et al., 2014) |      |     |      |         |         |         |         |         |         |         |         |      |      |     |       |       |      |      |      |     |     |
| DS01-01                                                   | 327  | 346 | 0.95 | 0.04876 | 0.00127 | 0.15072 | 0.00400 | 0.02242 | 0.00032 | 0.00629 | 0.00028 |      | 136  | 63  | 143   | 4     | 143  | 2.0  | 127  | 6   | 1.0 |
| DS01-02                                                   | 357  | 358 | 1.00 | 0.05047 | 0.00144 | 0.15089 | 0.00433 | 0.02169 | 0.00031 | 0.00650 | 0.00033 |      | 217  | 68  | 143   | 4     | 138  | 2.0  | 131  | 7   | 1.0 |
| DS01-03                                                   | 548  | 556 | 0.99 | 0.05023 | 0.00099 | 0.15030 | 0.00302 | 0.02170 | 0.00027 | 0.00712 | 0.00036 |      | 206  | 47  | 142   | 3     | 138  | 2.0  | 143  | 7   | 1.0 |
| DS01-04                                                   | 1391 | 998 | 1.39 | 0.05065 | 0.00117 | 0.14950 | 0.00361 | 0.02141 | 0.00032 | 0.00581 | 0.00037 |      | 225  | 55  | 141   | 3     | 137  | 2.0  | 117  | 7   | 1.0 |
| DS01-05                                                   | 340  | 361 | 0.94 | 0.04891 | 0.00157 | 0.14956 | 0.00477 | 0.02218 | 0.00032 | 0.00738 | 0.00052 |      | 144  | 76  | 142   | 4     | 141  | 2.0  | 149  | 10  | 1.0 |
| DS01-06                                                   | 289  | 473 | 0.61 | 0.04982 | 0.00084 | 0.19491 | 0.00346 | 0.02838 | 0.00036 | 0.00860 | 0.00042 |      | 187  | 40  | 181   | 3     | 180  | 2.0  | 173  | 8   | 1.0 |
| DS01-07                                                   | 380  | 389 | 0.97 | 0.04919 | 0.00209 | 0.14989 | 0.00616 | 0.02210 | 0.00035 | 0.00730 | 0.00100 |      | 157  | 99  | 142   | 5     | 141  | 2.0  | 147  | 20  | 1.0 |
| DS01-08                                                   | 568  | 658 | 0.86 | 0.04890 | 0.00090 | 0.14786 | 0.00281 | 0.02193 | 0.00028 | 0.00732 | 0.00047 |      | 143  | 44  | 140   | 2     | 140  | 2.0  | 147  | 9   | 1.0 |
| DS01-09                                                   | 236  | 268 | 0.88 | 0.04968 | 0.00141 | 0.15201 | 0.00436 | 0.02220 | 0.00031 | 0.00693 | 0.00045 |      | 180  | 68  | 144   | 4     | 142  | 2.0  | 140  | 9   | 1.0 |
| DS01-10                                                   | 96   | 136 | 0.70 | 0.04725 | 0.00551 | 0.14583 | 0.01653 | 0.02239 | 0.00066 | 0.00675 | 0.00137 |      | 62   | 236 | 138   | 15    | 143  | 4.0  | 136  | 28  | 1.0 |
| DS01-11                                                   | 214  | 221 | 0.97 | 0.05111 | 0.00229 | 0.15451 | 0.00680 | 0.02192 | 0.00035 | 0.00718 | 0.00055 |      | 246  | 105 | 146   | 6     | 140  | 2.0  | 145  | 11  | 1.0 |
| DS01-12                                                   | 753  | 694 | 1.08 | 0.04822 | 0.00104 | 0.14772 | 0.00316 | 0.02222 | 0.00027 | 0.00736 | 0.00057 |      | 110  | 52  | 140   | 3     | 142  | 2.0  | 148  | 11  | 1.0 |
| DS01-13                                                   | 376  | 601 | 0.63 | 0.04823 | 0.00248 | 0.14676 | 0.00739 | 0.02207 | 0.00043 | 0.00685 | 0.00097 |      | 111  | 116 | 139   | 7     | 141  | 3.0  | 138  | 19  | 1.0 |
| DS01-14                                                   | 250  | 304 | 0.82 | 0.04918 | 0.00426 | 0.14830 | 0.01250 | 0.02191 | 0.00061 | 0.00413 | 0.00085 |      | 156  | 196 | 140   | 11    | 140  | 4.0  | 83   | 17  | 1.0 |
| DS01-15                                                   | 543  | 439 | 1.24 | 0.04910 | 0.00109 | 0.14949 | 0.00334 | 0.02208 | 0.00028 | 0.00718 | 0.00048 |      | 153  | 53  | 141   | 3     | 141  | 2.0  | 145  | 10  | 1.0 |
| DS01-16                                                   | 295  | 198 | 1.49 | 0.04924 | 0.00235 | 0.15001 | 0.00711 | 0.02210 | 0.00038 | 0.00734 | 0.00064 |      | 159  | 110 | 142   | 6     | 141  | 2.0  | 148  | 13  | 1.0 |
| DS01-17                                                   | 248  | 282 | 0.88 | 0.04992 | 0.00130 | 0.15078 | 0.00397 | 0.02190 | 0.00029 | 0.00724 | 0.00048 |      | 191  | 62  | 143   | 4     | 140  | 2.0  | 146  | 10  | 1.0 |
| DS01-18                                                   | 311  | 306 | 1.02 | 0.05012 | 0.00154 | 0.15141 | 0.00469 | 0.02191 | 0.00033 | 0.00703 | 0.00058 |      | 201  | 73  | 143   | 4     | 140  | 2.0  | 142  | 12  | 1.0 |
| DS01-19                                                   | 480  | 187 | 2.56 | 0.05065 | 0.00337 | 0.15040 | 0.00986 | 0.02155 | 0.00046 | 0.00625 | 0.00089 |      | 225  | 153 | 142   | 9     | 137  | 3.0  | 126  | 18  | 1.0 |
| DS01-21                                                   | 36   | 648 | 0.06 | 0.11225 | 0.00144 | 3.72506 | 0.05160 | 0.24069 | 0.00286 | 0.07497 | 0.00572 |      | 1836 | 24  | 1577  | 11    | 1390 | 15.0 | 1461 | 108 | 0.9 |
| DS02-01                                                   | 238  | 108 | 2.20 | 0.04943 | 0.00345 | 0.14554 | 0.01004 | 0.02135 | 0.00040 | 0.00661 | 0.00042 |      | 168  | 159 | 138   | 9     | 136  | 3.0  | 133  | 8   | 1.0 |
| DS02-02                                                   | 207  | 149 | 1.39 | 0.04971 | 0.00220 | 0.14612 | 0.00645 | 0.02132 | 0.00032 | 0.00633 | 0.00036 |      | 181  | 103 | 138   | 6     | 136  | 2.0  | 128  | 7   | 1.0 |
| DS02-03                                                   | 164  | 97  | 1.70 | 0.04891 | 0.00324 | 0.14611 | 0.00961 | 0.02167 | 0.00037 | 0.00674 | 0.00040 |      | 144  | 150 | 138   | 9     | 138  | 2.0  | 136  | 8   | 1.0 |
| DS02-04                                                   | 166  | 152 | 1.09 | 0.04935 | 0.00288 | 0.15181 | 0.00868 | 0.02231 | 0.00038 | 0.00716 | 0.00071 |      | 164  | 133 | 144   | 8     | 142  | 2.0  | 144  | 14  | 1.0 |
| DS02-05                                                   | 177  | 114 | 1.55 | 0.05010 | 0.00311 | 0.15325 | 0.00940 | 0.02219 | 0.00039 | 0.00672 | 0.00046 |      | 200  | 142 | 145   | 8     | 141  | 2.0  | 135  | 9   | 1.0 |
| DS02-06                                                   | 695  | 466 | 1.49 | 0.04975 | 0.00100 | 0.14874 | 0.00312 | 0.02169 | 0.00028 | 0.00626 | 0.00036 |      | 183  | 48  | 141   | 3     | 138  | 2.0  | 126  | 7   | 1.0 |
| DS02-07                                                   | 293  | 142 | 2.06 | 0.04899 | 0.00193 | 0.14739 | 0.00579 | 0.02182 | 0.00031 | 0.00620 | 0.00037 |      | 147  | 92  | 140   | 5     | 139  | 2.0  | 125  | 7   | 1.0 |
| DS02-08                                                   | 300  | 186 | 1.62 | 0.04762 | 0.00211 | 0.14367 | 0.00625 | 0.02188 | 0.00033 | 0.00652 | 0.00060 |      | 80   | 99  | 136   | 6     | 140  | 2.0  | 131  | 12  | 1.0 |
| DS02-09                                                   | 256  | 195 | 1.32 | 0.04996 | 0.00199 | 0.14919 | 0.00593 | 0.02166 | 0.00033 | 0.00610 | 0.00044 |      | 193  | 95  | 141   | 5     | 138  | 2.0  | 123  | 9   | 1.0 |
| DS02-10                                                   | 116  | 83  | 1.40 | 0.04887 | 0.00491 | 0.14508 | 0.01432 | 0.02154 | 0.00049 | 0.00690 | 0.00094 |      | 142  | 225 | 138   | 13    | 137  | 3.0  | 139  | 19  | 1.0 |
| DS02-11                                                   | 182  | 158 | 1.15 | 0.04749 | 0.00215 | 0.14325 | 0.00639 | 0.02188 | 0.00031 | 0.00679 | 0.00048 |      | 74   | 100 | 136   | 6     | 140  | 2.0  | 137  | 10  | 1.0 |
| DS02-12                                                   | 147  | 98  | 1.49 | 0.05117 | 0.00277 | 0.14642 | 0.00787 | 0.02075 | 0.00031 | 0.00605 | 0.00030 |      | 248  | 126 | 139   | 7     | 132  | 2.0  | 122  | 6   | 0.9 |
| DS02-13                                                   | 230  | 158 | 1.46 | 0.04805 | 0.00349 | 0.14590 | 0.01036 | 0.02205 | 0.00044 | 0.00697 | 0.00083 |      | 102  | 163 | 138   | 9     | 141  | 3.0  | 140  | 17  | 1.0 |
| DS02-15                                                   | 456  | 297 | 1.54 | 0.05091 | 0.00319 | 0.14996 | 0.00922 | 0.02137 | 0.00046 | 0.00510 | 0.00050 |      | 237  | 145 | 142   | 8     | 136  | 3.0  | 103  | 10  | 1.0 |
| DS02-16                                                   | 124  | 87  | 1.43 | 0.05031 | 0.00818 | 0.14995 | 0.02396 | 0.02161 | 0.00075 | 0.00587 | 0.00073 |      | 209  | 326 | 142   | 21    | 138  | 5.0  | 118  | 15  | 1.0 |
| DS02-17                                                   | 225  |     |      |         |         |         |         |         |         |         |         |      |      |     |       |       |      |      |      |     |     |



|              |      |      |      |         |         |         |         |         |         |         |         |     |     |     |    |     |      |     |    |     |
|--------------|------|------|------|---------|---------|---------|---------|---------|---------|---------|---------|-----|-----|-----|----|-----|------|-----|----|-----|
| GW03-02      | 585  | 532  | 1.10 | 0.04993 | 0.00108 | 0.14781 | 0.00331 | 0.02147 | 0.00029 | 0.00634 | 0.00037 | 192 | 51  | 140 | 3  | 137 | 2.0  | 128 | 7  | 1.0 |
| GW03-03      | 330  | 220  | 1.50 | 0.04775 | 0.00150 | 0.13934 | 0.00440 | 0.02117 | 0.00029 | 0.00676 | 0.00038 | 87  | 72  | 132 | 4  | 135 | 2.0  | 136 | 8  | 1.0 |
| GW03-04      | 169  | 149  | 1.13 | 0.05005 | 0.00203 | 0.14178 | 0.00573 | 0.02055 | 0.00030 | 0.00655 | 0.00039 | 197 | 96  | 135 | 5  | 131 | 2.0  | 132 | 8  | 1.0 |
| GW03-05      | 406  | 217  | 1.87 | 0.04948 | 0.00156 | 0.14312 | 0.00452 | 0.02098 | 0.00029 | 0.00631 | 0.00038 | 171 | 75  | 136 | 4  | 134 | 2.0  | 127 | 8  | 1.0 |
| GW03-06      | 422  | 252  | 1.68 | 0.05036 | 0.00160 | 0.14399 | 0.00455 | 0.02074 | 0.00029 | 0.00627 | 0.00043 | 212 | 75  | 137 | 4  | 132 | 2.0  | 126 | 9  | 1.0 |
| GW03-07      | 303  | 148  | 2.05 | 0.04811 | 0.00199 | 0.14254 | 0.00587 | 0.02149 | 0.00031 | 0.00644 | 0.00042 | 105 | 94  | 135 | 5  | 137 | 2.0  | 130 | 8  | 1.0 |
| GW03-09      | 331  | 191  | 1.73 | 0.04918 | 0.00180 | 0.14190 | 0.00516 | 0.02093 | 0.00030 | 0.00599 | 0.00044 | 156 | 86  | 135 | 5  | 134 | 2.0  | 121 | 9  | 1.0 |
| GW03-10      | 785  | 562  | 1.40 | 0.04695 | 0.00091 | 0.13726 | 0.00276 | 0.02120 | 0.00027 | 0.00614 | 0.00044 | 47  | 44  | 131 | 2  | 135 | 2.0  | 124 | 9  | 1.0 |
| GW03-11      | 122  | 81   | 1.51 | 0.04884 | 0.00342 | 0.14435 | 0.01002 | 0.02143 | 0.00035 | 0.00666 | 0.00039 | 140 | 159 | 137 | 9  | 137 | 2.0  | 134 | 8  | 1.0 |
| GW03-12      | 475  | 343  | 1.39 | 0.05063 | 0.00122 | 0.14779 | 0.00356 | 0.02117 | 0.00027 | 0.00684 | 0.00039 | 224 | 57  | 140 | 3  | 135 | 2.0  | 138 | 8  | 1.0 |
| GW03-13      | 651  | 425  | 1.53 | 0.05008 | 0.00127 | 0.14783 | 0.00377 | 0.02141 | 0.00029 | 0.00619 | 0.00038 | 199 | 60  | 140 | 3  | 137 | 2.0  | 125 | 8  | 1.0 |
| GW03-14      | 1607 | 1017 | 1.58 | 0.04838 | 0.00141 | 0.14537 | 0.00425 | 0.02179 | 0.00033 | 0.00559 | 0.00056 | 118 | 69  | 138 | 4  | 139 | 2.0  | 113 | 11 | 1.0 |
| GW03-15      | 897  | 431  | 2.08 | 0.05030 | 0.00201 | 0.14733 | 0.00577 | 0.02125 | 0.00035 | 0.00658 | 0.00069 | 209 | 95  | 140 | 5  | 136 | 2.0  | 133 | 14 | 1.0 |
| GW03-16      | 179  | 147  | 1.22 | 0.04873 | 0.00190 | 0.14269 | 0.00556 | 0.02124 | 0.00030 | 0.00613 | 0.00035 | 135 | 90  | 135 | 5  | 135 | 2.0  | 124 | 7  | 1.0 |
| GW03-17      | 836  | 524  | 1.59 | 0.04962 | 0.00092 | 0.14635 | 0.00285 | 0.02139 | 0.00028 | 0.00617 | 0.00036 | 177 | 44  | 139 | 3  | 136 | 2.0  | 124 | 7  | 1.0 |
| GW03-18      | 1017 | 475  | 2.14 | 0.04997 | 0.00114 | 0.14757 | 0.00337 | 0.02142 | 0.00027 | 0.00705 | 0.00057 | 194 | 54  | 140 | 3  | 137 | 2.0  | 142 | 11 | 1.0 |
| GW03-19      | 422  | 302  | 1.40 | 0.04903 | 0.00131 | 0.14648 | 0.00393 | 0.02167 | 0.00029 | 0.00704 | 0.00054 | 149 | 64  | 139 | 3  | 138 | 2.0  | 142 | 11 | 1.0 |
| GW03-20      | 179  | 68   | 2.64 | 0.04930 | 0.00513 | 0.14257 | 0.01465 | 0.02098 | 0.00046 | 0.00645 | 0.00066 | 162 | 233 | 135 | 13 | 134 | 3.0  | 130 | 13 | 1.0 |
| GW03-21      | 338  | 217  | 1.55 | 0.04954 | 0.00217 | 0.14551 | 0.00633 | 0.02131 | 0.00035 | 0.00659 | 0.00069 | 173 | 102 | 138 | 6  | 136 | 2.0  | 133 | 14 | 1.0 |
|              |      |      |      |         |         |         |         |         |         |         |         |     |     |     |    |     |      |     |    |     |
| DY11-23-4-1  | 24   | 29   | 0.83 |         |         | 0.13990 | 0.04736 | 0.02123 | 0.00014 |         |         |     |     |     |    | 135 | 0.9  |     |    |     |
| DY11-23-4-2  | 26   | 22   | 1.19 |         |         | 0.15116 | 0.01440 | 0.02160 | 0.00091 |         |         |     |     |     |    | 138 | 5.7  |     |    |     |
| DY11-23-4-3  | 51   | 19   | 2.67 |         |         | 0.15026 | 0.04658 | 0.02044 | 0.00096 |         |         |     |     |     |    | 130 | 6.1  |     |    |     |
| DY11-23-4-4  | 33   | 45   | 0.74 |         |         | 0.36902 | 0.03433 | 0.02131 | 0.00143 |         |         |     |     |     |    | 136 | 9.0  |     |    |     |
| DY11-23-4-5  | 35   | 26   | 1.33 |         |         | 0.15003 | 0.00646 | 0.02084 | 0.00160 |         |         |     |     |     |    | 133 | 10.1 |     |    |     |
| DY11-23-4-6  | 18   | 9    | 1.99 |         |         | 0.17879 | 0.07856 | 0.02542 | 0.00357 |         |         |     |     |     |    | 162 | 22.4 |     |    |     |
| DY11-23-4-7  | 74   | 35   | 2.10 |         |         | 0.27263 | 0.07477 | 0.02145 | 0.00172 |         |         |     |     |     |    | 137 | 10.8 |     |    |     |
| DY11-23-4-8  | 96   | 46   | 2.11 |         |         | 0.13974 | 0.01979 | 0.02156 | 0.00154 |         |         |     |     |     |    | 137 | 9.7  |     |    |     |
| DY11-23-4-9  | 17   | 17   | 0.97 |         |         | 0.15398 | 0.02913 | 0.02151 | 0.00221 |         |         |     |     |     |    | 137 | 14.0 |     |    |     |
| DY11-23-4-10 | 250  | 119  | 2.11 |         |         | 0.15944 | 0.03950 | 0.02191 | 0.00194 |         |         |     |     |     |    | 140 | 12.3 |     |    |     |
| DY11-23-4-11 | 67   | 21   | 3.22 |         |         | 0.30103 | 0.05334 | 0.02557 | 0.00189 |         |         |     |     |     |    | 163 | 11.9 |     |    |     |
| DY11-23-4-12 | 95   | 64   | 1.48 |         |         | 0.16453 | 0.01130 | 0.02174 | 0.00072 |         |         |     |     |     |    | 139 | 4.6  |     |    |     |
| DY11-23-4-13 | 48   | 51   | 0.94 |         |         | 0.19868 | 0.03085 | 0.02189 | 0.00025 |         |         |     |     |     |    | 140 | 1.6  |     |    |     |
| DY11-23-4-14 | 24   | 16   | 1.51 |         |         | 0.15347 | 0.01756 | 0.02136 | 0.00162 |         |         |     |     |     |    | 136 | 10.2 |     |    |     |
| DY11-23-4-15 | 15   | 10   | 1.50 |         |         | 0.13512 | 0.04989 | 0.02191 | 0.00464 |         |         |     |     |     |    | 140 | 29.3 |     |    |     |
| DY11-23-4-16 | 63   | 55   | 1.14 |         |         | 0.31033 | 0.06960 | 0.03198 | 0.00203 |         |         |     |     |     |    | 203 | 12.7 |     |    |     |
| DY11-23-4-17 | 110  | 71   | 1.55 |         |         | 0.31608 | 0.03573 | 0.02423 | 0.00094 |         |         |     |     |     |    | 154 | 5.9  |     |    |     |
| DY11-23-4-18 | 23   | 6    | 3.90 |         |         | 0.71229 | 0.14376 | 0.03089 | 0.00079 |         |         |     |     |     |    | 196 | 4.9  |     |    |     |
| DY11-23-4-19 | 25   | 11   | 2.17 |         |         | 0.15695 | 0.05162 | 0.02011 | 0.00244 |         |         |     |     |     |    | 128 | 15.4 |     |    |     |
| DY11-23-4-20 | 31   | 21   | 1.47 |         |         | 0.16106 | 0.01797 | 0.02187 | 0.00078 |         |         |     |     |     |    | 139 | 4.9  |     |    |     |
|              |      |      |      |         |         |         |         |         |         |         |         |     |     |     |    |     |      |     |    |     |
| DY11-24-6-1  | 77   | 52   | 1.47 |         |         | 0.16366 | 0.00917 | 0.02210 | 0.00066 |         |         |     |     |     |    | 141 | 4.1  |     |    |     |
| DY11-24-6-2  | 60   | 66   | 0.91 |         |         | 0.16539 | 0.01253 | 0.02245 | 0.00057 |         |         |     |     |     |    | 143 | 3.6  |     |    |     |
| DY11-24-6-3  | 184  | 92   | 2.01 |         |         | 0.16109 | 0.01666 | 0.02200 | 0.00047 |         |         |     |     |     |    | 140 | 2.9  |     |    |     |
| DY11-24-6-4  | 112  | 68   | 1.64 |         |         | 0.30837 | 0.01712 | 0.02203 | 0.00086 |         |         |     |     |     |    | 140 | 5.4  |     |    |     |
| DY11-24-6-5  | 65   | 46   | 1.43 |         |         | 0.15261 | 0.02034 | 0.02210 | 0.00126 |         |         |     |     |     |    | 141 | 7.9  |     |    |     |
| DY11-24-6-6  | 194  | 118  | 1.65 |         |         | 0.21250 | 0.00085 | 0.02520 | 0.00053 |         |         |     |     |     |    | 160 | 3.3  |     |    |     |
| DY11-24-6-7  | 97   | 97   | 1.00 |         |         | 0.18072 | 0.02158 | 0.02264 | 0.00119 |         |         |     |     |     |    | 144 | 7.5  |     |    |     |
| DY11-24-6-8  | 80   | 60   | 1.35 |         |         | 0.14109 | 0.00905 | 0.02184 | 0.00040 |         |         |     |     |     |    | 139 | 2.5  |     |    |     |
| DY11-24-6-9  | 42   | 31   | 1.35 |         |         | 0.18810 | 0.04637 | 0.02091 | 0.00056 |         |         |     |     |     |    | 133 | 3.6  |     |    |     |
| DY11-24-6-10 | 506  | 271  | 1.87 |         |         | 0.22312 | 0.00155 | 0.02091 | 0.00112 |         |         |     |     |     |    | 133 | 7.1  |     |    |     |
| DY11-24-6-11 | 105  | 56   | 1.87 |         |         | 0.46882 | 0.03667 | 0.02201 | 0.00115 |         |         |     |     |     |    | 140 | 7.3  |     |    |     |
| DY11-24-6-12 | 281  | 214  | 1.31 |         |         | 0.16829 | 0.01008 | 0.02258 | 0.00139 |         |         |     |     |     |    | 144 | 8.8  |     |    |     |
| DY11-24-6-13 | 191  | 139  | 1.37 |         |         | 0.14433 | 0.00943 | 0.02196 | 0.00080 |         |         |     |     |     |    | 140 | 5.0  |     |    |     |
| DY11-24-6-14 | 63   | 49   | 1.28 |         |         | 0.44481 | 0.01788 | 0.02185 | 0.00059 |         |         |     |     |     |    | 139 | 3.7  |     |    |     |
| DY11-24-6-15 | 813  | 310  | 2.62 |         |         | 0.16018 | 0.00282 | 0.02188 | 0.00029 |         |         |     |     |     |    | 140 | 1.8  |     |    |     |
| DY11-24-6-16 | 95   | 66   | 1.44 |         |         | 0.14778 | 0.01057 | 0.02196 | 0.00038 |         |         |     |     |     |    | 140 | 2.4  |     |    |     |
| DY11-24-6-17 | 73   | 51   | 1.44 |         |         | 0.16882 | 0.00303 | 0.02244 | 0.00060 |         |         |     |     |     |    | 143 | 3.8  |     |    |     |
| DY11-24-6-18 | 111  | 73   | 1.53 |         |         | 0.14944 | 0.00921 | 0.02202 | 0.00079 |         |         |     |     |     |    | 140 | 5.0  |     |    |     |
| DY11-24-6-19 | 117  | 62   | 1.88 |         |         | 0.23985 | 0.02778 | 0.02341 | 0.00140 |         |         |     |     |     |    | 149 | 8.8  |     |    |     |
| DY11-24-6-20 | 135  | 95   | 1.43 |         |         | 0.19803 | 0.005   |         |         |         |         |     |     |     |    |     |      |     |    |     |



|                          |                |                |                 |                    |                    |                    |                    |                |                |
|--------------------------|----------------|----------------|-----------------|--------------------|--------------------|--------------------|--------------------|----------------|----------------|
| DY11-152-1-1             | 146            | 85             | 1.72            | 0.15864            | 0.00588            | 0.02278            | 0.00028            | 145            | 1.8            |
| DY11-152-1-2             | 69             | 43             | 1.58            | 0.14990            | 0.01918            | 0.02231            | 0.00032            | 142            | 2.0            |
| <del>DY11-152-1-3</del>  | <del>44</del>  | <del>31</del>  | <del>1.40</del> | <del>0.15298</del> | <del>0.01900</del> | <del>0.02276</del> | <del>0.00115</del> | <del>145</del> | <del>7.2</del> |
| DY11-152-1-4             | 59             | 61             | 0.97            | 0.16791            | 0.00546            | 0.02238            | 0.00051            | 143            | 3.2            |
| <del>DY11-152-1-5</del>  | <del>49</del>  | <del>23</del>  | <del>0.84</del> | <del>0.26543</del> | <del>0.02514</del> | <del>0.02270</del> | <del>0.00083</del> | <del>145</del> | <del>5.2</del> |
| DY11-152-1-6             | 132            | 81             | 1.64            | 0.15274            | 0.00538            | 0.02209            | 0.00035            | 141            | 2.2            |
| DY11-152-1-7             | 22             | 20             | 1.06            | 0.14472            | 0.00682            | 0.02180            | 0.00050            | 139            | 3.1            |
| DY11-152-1-8             | 78             | 61             | 1.28            | 0.15198            | 0.00484            | 0.02230            | 0.00050            | 142            | 3.1            |
| DY11-152-1-9             | 124            | 83             | 1.49            | 0.14638            | 0.01110            | 0.02194            | 0.00092            | 140            | 5.8            |
| DY11-152-1-10            | 439            | 211            | 2.08            | 0.15563            | 0.00342            | 0.02224            | 0.00031            | 142            | 1.9            |
| DY11-152-1-11            | 140            | 69             | 2.03            | 0.15317            | 0.00324            | 0.02221            | 0.00024            | 142            | 1.5            |
| DY11-152-1-12            | 119            | 75             | 1.59            | 0.15387            | 0.01544            | 0.02242            | 0.00046            | 143            | 2.9            |
| DY11-152-1-13            | 93             | 63             | 1.48            | 0.15290            | 0.00411            | 0.02231            | 0.00037            | 142            | 2.3            |
| DY11-152-1-14            | 65             | 65             | 1.01            | 0.16716            | 0.01294            | 0.02221            | 0.00067            | 142            | 4.2            |
| DY11-152-1-15            | 103            | 88             | 1.18            | 0.15756            | 0.00301            | 0.02222            | 0.00028            | 142            | 1.7            |
| DY11-152-1-16            | 19             | 21             | 0.89            | 0.16131            | 0.00724            | 0.02205            | 0.00037            | 141            | 2.4            |
| <del>DY11-152-1-17</del> | <del>188</del> | <del>114</del> | <del>1.65</del> | <del>0.19112</del> | <del>0.00430</del> | <del>0.02145</del> | <del>0.00037</del> | <del>137</del> | <del>2.3</del> |
| DY11-152-1-18            | 51             | 44             | 1.17            | 0.15770            | 0.00949            | 0.02196            | 0.00054            | 140            | 3.4            |
| <del>DY11-152-1-19</del> | <del>31</del>  | <del>50</del>  | <del>0.63</del> | <del>0.19331</del> | <del>0.01536</del> | <del>0.02797</del> | <del>0.00059</del> | <del>178</del> | <del>3.7</del> |
| DY11-152-1-20            | 74             | 69             | 1.08            | 0.14682            | 0.00622            | 0.02224            | 0.00036            | 142            | 2.3            |

M7, Jiande Group in Pujiang (Liu et al., 2014)

|                    |                |                |                 |                    |                    |                    |                    |                    |                    |                    |                    |                |                |                |               |                |                |               |               |                |
|--------------------|----------------|----------------|-----------------|--------------------|--------------------|--------------------|--------------------|--------------------|--------------------|--------------------|--------------------|----------------|----------------|----------------|---------------|----------------|----------------|---------------|---------------|----------------|
| LC04-01            | 219            | 138            | 1.58            | 0.04870            | 0.00675            | 0.14682            | 0.01977            | 0.02182            | 0.00084            | 0.00303            | 0.00034            | 133            | 278            | 139            | 18            | 139            | 5.0            | 61            | 7             | 1.0            |
| LC04-02            | 342            | 312            | 1.10            | 0.04852            | 0.00545            | 0.14181            | 0.01542            | 0.02121            | 0.00073            | 0.00366            | 0.00057            | 125            | 243            | 135            | 14            | 135            | 5.0            | 74            | 11            | 1.0            |
| LC04-03            | 416            | 227            | 1.83            | 0.04899            | 0.00455            | 0.14314            | 0.01293            | 0.02119            | 0.00060            | 0.00531            | 0.00072            | 147            | 211            | 136            | 11            | 135            | 4.0            | 107           | 14            | 1.0            |
| LC04-04            | 504            | 501            | 1.01            | 0.04778            | 0.00375            | 0.13903            | 0.01059            | 0.02112            | 0.00057            | 0.00403            | 0.00059            | 88             | 176            | 132            | 9             | 135            | 4.0            | 81            | 12            | 1.0            |
| LC04-05            | 225            | 216            | 1.04            | 0.04988            | 0.00521            | 0.14441            | 0.01460            | 0.02100            | 0.00066            | 0.00541            | 0.00112            | 189            | 234            | 137            | 13            | 134            | 4.0            | 109           | 23            | 1.0            |
| LC04-06            | 622            | 544            | 1.14            | 0.04872            | 0.00177            | 0.14236            | 0.00517            | 0.02119            | 0.00037            | 0.00548            | 0.00056            | 134            | 85             | 135            | 5             | 135            | 2.0            | 110           | 11            | 1.0            |
| LC04-07            | 157            | 178            | 0.88            | 0.04957            | 0.00335            | 0.14660            | 0.00970            | 0.02145            | 0.00048            | 0.00539            | 0.00059            | 175            | 154            | 139            | 9             | 137            | 3.0            | 109           | 12            | 1.0            |
| LC04-08            | 347            | 327            | 1.06            | 0.04862            | 0.00181            | 0.14108            | 0.00529            | 0.02105            | 0.00037            | 0.00441            | 0.00034            | 130            | 86             | 134            | 5             | 134            | 2.0            | 89            | 7             | 1.0            |
| LC04-09            | 375            | 284            | 1.32            | 0.05268            | 0.00326            | 0.15536            | 0.00939            | 0.02139            | 0.00048            | 0.00589            | 0.00092            | 315            | 144            | 147            | 8             | 136            | 3.0            | 119           | 18            | 0.9            |
| LC04-10            | 375            | 322            | 1.16            | 0.04857            | 0.00172            | 0.14457            | 0.00517            | 0.02159            | 0.00037            | 0.00429            | 0.00032            | 127            | 82             | 137            | 5             | 138            | 2.0            | 87            | 6             | 1.0            |
| LC04-11            | 755            | 731            | 1.03            | 0.04975            | 0.00099            | 0.14688            | 0.00319            | 0.02141            | 0.00033            | 0.00357            | 0.00015            | 183            | 47             | 139            | 3             | 137            | 2.0            | 72            | 3             | 1.0            |
| LC04-12            | 378            | 406            | 0.93            | 0.04846            | 0.00134            | 0.14226            | 0.00407            | 0.02129            | 0.00034            | 0.00464            | 0.00025            | 122            | 66             | 135            | 4             | 136            | 2.0            | 94            | 5             | 1.0            |
| LC04-13            | 133            | 82             | 1.62            | 0.04970            | 0.00372            | 0.14793            | 0.01096            | 0.02159            | 0.00044            | 0.00309            | 0.00015            | 181            | 170            | 140            | 10            | 138            | 3.0            | 62            | 3             | 1.0            |
| LC04-14            | 451            | 265            | 1.70            | 0.04868            | 0.00164            | 0.14458            | 0.00495            | 0.02154            | 0.00036            | 0.00386            | 0.00019            | 132            | 79             | 137            | 4             | 137            | 2.0            | 78            | 4             | 1.0            |
| LC04-15            | 308            | 226            | 1.36            | 0.04913            | 0.00395            | 0.14507            | 0.01133            | 0.02140            | 0.00059            | 0.00161            | 0.00012            | 154            | 182            | 138            | 10            | 136            | 4.0            | 33            | 2             | 1.0            |
| LC04-16            | 301            | 276            | 1.09            | 0.04904            | 0.00168            | 0.14312            | 0.00497            | 0.02117            | 0.00035            | 0.00376            | 0.00020            | 150            | 81             | 136            | 4             | 135            | 2.0            | 76            | 4             | 1.0            |
| LC04-17            | 340            | 307            | 1.11            | 0.04725            | 0.00156            | 0.13796            | 0.00464            | 0.02118            | 0.00035            | 0.00402            | 0.00022            | 62             | 73             | 131            | 4             | 135            | 2.0            | 81            | 4             | 1.0            |
| LC04-18            | 432            | 328            | 1.32            | 0.04799            | 0.00193            | 0.14008            | 0.00562            | 0.02117            | 0.00039            | 0.00359            | 0.00023            | 99             | 91             | 133            | 5             | 135            | 2.0            | 72            | 5             | 1.0            |
| LC04-19            | 256            | 137            | 1.87            | 0.04831            | 0.00408            | 0.14090            | 0.01155            | 0.02114            | 0.00060            | 0.00104            | 0.00006            | 114            | 190            | 134            | 10            | 135            | 4.0            | 21            | 1             | 1.0            |
| LC04-20            | 188            | 132            | 1.42            | 0.04890            | 0.00285            | 0.14346            | 0.00829            | 0.02128            | 0.00041            | 0.00421            | 0.00029            | 143            | 132            | 136            | 7             | 136            | 3.0            | 85            | 6             | 1.0            |
| LC04-21            | 160            | 124            | 1.29            | 0.04775            | 0.00522            | 0.13849            | 0.01458            | 0.02104            | 0.00075            | 0.00061            | 0.00005            | 87             | 230            | 132            | 13            | 134            | 5.0            | 12            | 1             | 1.0            |
| LC04-22            | 97             | 61             | 1.60            | 0.04634            | 0.00493            | 0.13716            | 0.01444            | 0.02147            | 0.00052            | 0.00214            | 0.00013            | 15             | 219            | 131            | 13            | 137            | 3.0            | 43            | 3             | 1.0            |
| LC04-23            | 262            | 239            | 1.10            | 0.04852            | 0.00260            | 0.14118            | 0.00744            | 0.02111            | 0.00041            | 0.00627            | 0.00081            | 125            | 121            | 134            | 7             | 135            | 3.0            | 126           | 16            | 1.0            |
| LC04-24            | 189            | 112            | 1.69            | 0.04868            | 0.00505            | 0.14102            | 0.01432            | 0.02101            | 0.00060            | 0.00370            | 0.00039            | 132            | 232            | 134            | 13            | 134            | 4.0            | 75            | 8             | 1.0            |
|                    |                |                |                 |                    |                    |                    |                    |                    |                    |                    |                    |                |                |                |               |                |                |               |               |                |
| HJ07-01            | 227            | 290            | 0.78            | 0.04884            | 0.00173            | 0.13831            | 0.00492            | 0.02054            | 0.00034            | 0.00540            | 0.00032            | 140            | 83             | 132            | 4             | 131            | 2.0            | 109           | 6             | 1.0            |
| HJ07-02            | 445            | 419            | 1.06            | 0.04878            | 0.00140            | 0.13364            | 0.00396            | 0.01987            | 0.00032            | 0.00378            | 0.00018            | 137            | 69             | 127            | 4             | 127            | 2.0            | 76            | 4             | 1.0            |
| HJ07-03            | 192            | 211            | 0.91            | 0.04887            | 0.00259            | 0.13723            | 0.00721            | 0.02037            | 0.00040            | 0.00340            | 0.00022            | 142            | 121            | 131            | 6             | 130            | 3.0            | 69            | 4             | 1.0            |
| HJ07-04            | 186            | 229            | 0.81            | 0.04866            | 0.00203            | 0.13408            | 0.00561            | 0.01999            | 0.00035            | 0.00346            | 0.00019            | 131            | 96             | 128            | 5             | 128            | 2.0            | 70            | 4             | 1.0            |
| HJ07-05            | 91             | 138            | 0.66            | 0.04872            | 0.00293            | 0.13858            | 0.00826            | 0.02063            | 0.00040            | 0.00492            | 0.00040            | 134            | 136            | 132            | 7             | 132            | 3.0            | 99            | 8             | 1.0            |
| HJ07-06            | 186            | 250            | 0.74            | 0.04865            | 0.00382            | 0.13335            | 0.01023            | 0.01992            | 0.00053            | 0.00203            | 0.00021            | 131            | 177            | 127            | 9             | 127            | 3.0            | 41            | 4             | 1.0            |
| HJ07-07            | 158            | 186            | 0.85            | 0.04884            | 0.00288            | 0.13560            | 0.00791            | 0.02015            | 0.00042            | 0.00316            | 0.00023            | 140            | 134            | 129            | 7             | 129            | 3.0            | 64            | 5             | 1.0            |
| HJ07-08            | 234            | 275            | 0.85            | 0.05012            | 0.00359            | 0.14205            | 0.00988            | 0.02057            | 0.00049            | 0.00775            | 0.00152            | 201            | 164            | 135            | 9             | 131            | 3.0            | 156           | 30            | 1.0            |
| HJ07-09            | 138            | 175            | 0.79            | 0.04866            | 0.00246            | 0.13609            | 0.00684            | 0.02029            | 0.00038            | 0.00519            | 0.00043            | 131            | 115            | 130            | 6             | 129            | 2.0            | 105           | 9             | 1.0            |
| HJ07-10            | 131            | 153            | 0.86            | 0.04860            | 0.00288            | 0.13722            | 0.00808            | 0.02049            | 0.00040            | 0.00410            | 0.00033            | 129            | 134            | 131            | 7             | 131            | 3.0            | 83            | 7             | 1.0            |
| <del>HJ07-11</del> | <del>139</del> | <del>197</del> | <del>0.70</del> | <del>0.04962</del> | <del>0.00447</del> | <del>0.15536</del> | <del>0.01359</del> | <del>0.02275</del> | <del>0.00069</del> | <del>0.00159</del> | <del>0.00016</del> | <del>177</del> | <del>205</del> | <del>147</del> | <del>12</del> | <del>145</del> | <del>4.0</del> | <del>32</del> | <del>3</del>  | <del>1.0</del> |
| HJ07-12            | 153            | 190            | 0.80            | 0.04874            | 0.00223            | 0.13556            | 0.00621            | 0.02018            | 0.00036            | 0.00468            | 0.00028            | 135            | 104            | 129            | 6             | 129            | 2.0            | 94            | 6             | 1.0            |
| HJ07-13            | 220            | 265            | 0.83            | 0.04872            | 0.00209            | 0.13658            | 0.00588            | 0.02034            | 0.00037            | 0.00436            | 0.00029            | 134            | 99             | 130            | 5             | 130            | 2.0            | 88            | 6             | 1.0            |
| HJ07-14            | 301            | 364            | 0.83            | 0.04861            | 0.00164            | 0.13678            | 0.00467            | 0.02042            | 0.00033            | 0.00552            | 0.00039            | 129            | 79             | 130            | 4             | 130            | 2.0            | 111           | 8             | 1.0            |
| HJ07-15            | 101            | 163            | 0.62            | 0.04851            | 0.00271            | 0.13854            | 0.00770            | 0.02072            | 0.00040            | 0.00434            | 0.00033            | 124            | 126            | 132            | 7             | 132            | 3.0            | 88            | 7             | 1.0            |
| HJ07-16            | 198            | 294            | 0.67            | 0.04877            | 0.00168            | 0.13820            | 0.00484            | 0.02056            | 0.00034            | 0.00519            | 0.00038            | 137            | 81             | 131            | 4             | 131            | 2.0            | 105           | 8             | 1.0            |
| HJ07-17            | 166            | 185            | 0.89            | 0.04870            | 0.00509            | 0.13440            | 0.01364            | 0.02003            | 0.00060            | 0.00639            | 0.00124            | 133            | 234            | 128            | 12            | 128            | 4.0            | 129           | 25            | 1.0            |
| HJ07-18            | 158            | 201            | 0.78            | 0.04871            | 0.00218            | 0.13949            | 0.00624            | 0.02077            | 0.00036            | 0.00553            | 0.00046            | 134            | 102            | 133            | 6             | 133            | 2.0            | 111           | 9             | 1.0            |
| HJ07-19            | 96             | 146            | 0.66            | 0.05347            | 0.00299            | 0.15155            | 0.00839            | 0.02056            | 0.00042            | 0.00480            | 0.00043            | 349            | 130            | 143            | 7             | 131            | 3.0            | 97            | 9             | 0.9            |
| HJ07-20            | 207            | 290            | 0.71            | 0.04844            | 0.00212            | 0.13594            | 0.00596            | 0.02036            | 0.00039            | 0.00404            | 0.00036            | 121            | 99             | 129            | 5             | 130            | 2.0            | 81            | 7             | 1.0            |
| HJ07-21            | 141            | 179            | 0.79            | 0.04816            | 0.00566            | 0.13780            | 0.01568            | 0.02077            | 0.00070            | 0.00636            | 0.00168            | 107            | 248            | 131            | 14            | 133            | 4.0            | 128           | 34            | 1.0            |
|                    |                |                |                 |                    |                    |                    |                    |                    |                    |                    |                    |                |                |                |               |                |                |               |               |                |
| SC02-01            | 106            | 132            | 0.81            | 0.04662            | 0.00376            | 0.12357            | 0.00984            | 0.01922            | 0.00042            | 0.00535            | 0.00042            | 30             | 180            | 118            | 9             | 123            | 3.0            | 108           | 8             | 1.0            |
| <del>SC02-02</del> | <del>45</del>  | <del>57</del>  | <del>0.80</del> | <del>0.05079</del> | <del>0.01795</del> | <del>0.12739</del> | <del>0.04410</del> | <del>0.01818</del> | <del>0.00136</del> | <del>0.00229</del> | <del>0.00061</del> | <del>231</del> | <del>616</del> | <del>122</del> | <del>40</del> | <del>116</del> | <del>9.0</del> | <del>46</del> | <del>12</del> | <del>1.0</del> |
| SC02-03            | 69             | 83             | 0.83            | 0.04905            | 0.00693            | 0.12948            | 0.01794            | 0.01914            | 0.00062            | 0.00591            | 0.00089            | 150            | 283            | 124            | 16            | 122            | 4.0            | 119           | 18            | 1.0            |
| SC02-04            | 43             | 58             | 0.74            | 0.05090            | 0.01082            | 0.13310            | 0.02778            | 0.01895            | 0.00085            | 0.00302            | 0.00046            | 236            | 397            | 127            | 25            | 121            | 5.0            | 61            | 9             | 1.0            |
| SC02-05            | 70             | 70             | 1.00            | 0.05100            | 0.00859            | 0.13591            | 0.02244            | 0.01932            | 0.00072            | 0.00629            | 0.00109            | 241            | 342            | 129            | 20            | 123            | 5.0            | 127           | 22            | 1.0            |
| SC02-06            | 130            | 248            | 0.52            | 0.04931            | 0.00259            | 0.13188            | 0.00682            | 0.01940            | 0.00036            | 0.00571            | 0.00059            | 163            | 120            | 126            | 6             | 124            | 2.0            | 115           | 12            | 1.0            |
| SC02-08            | 100            | 105            | 0.96            | 0.04957            | 0.00606            | 0.13041            | 0.01559            | 0.01908            | 0.00060            | 0.00355            | 0.00042            | 175            | 260            | 124            | 14            | 122            | 4.0            | 72            | 8             | 1.0            |
| SC02-09            | 67             | 71             | 0.94            | 0.04862            | 0.00520            | 0.12962            | 0.01373            | 0.01933            | 0.00044            | 0.00405            | 0.00034            | 130            | 236            | 124            | 12            | 123            | 3.0            | 82            | 7             | 1.0            |
| SC02-10            | 141            | 293            | 0.48            | 0.04840            | 0.00193            | 0.12821            | 0.00511            | 0.01921            | 0.00033            | 0.00475            | 0.00043            | 119            | 91             | 122            | 5             | 123            | 2.0            | 96            | 9             | 1.0            |
| <del>SC02-11</del> | <del>75</del>  | <del>92</del>  | <del>0.82</del> | <del>0.04895</del> | <del>0.01089</del> | <del>0.12993</del> | <del>0.02817</del> | <del>0.01915</del> | <del>0.00104</del> | <del>0.00159</del> | <del>0.00028</del> | <del>145</del> | <del>394</del> | <del>124</del> | <del>25</del> | <del>122</del> | <del>7.0</del> | <del>32</del> | <del>6</del>  | <del>1.0</del> |
| SC02-12            | 38             | 55             | 0.70            | 0.04765            | 0.01022            | 0.12856            | 0.02714            | 0.01955            | 0.00085            | 0.00277            | 0.00040            | 82             | 372            | 123            | 24            | 125            | 5.0            | 56            | 8             | 1.0            |
| <del>SC02-13</del> | <del>70</del>  | <del>70</del>  | <del>1.00</del> | <del>0.04739</del> | <del>0.01341</del> | <del>0.12342</del> | <del>0.03436</del> | <del>0.01890</del> | <del>0.00104</del> | <del>0.00163</del> | <del>0.00044</del> | <del>69</del>  | <del>470</del> | <del>118</del> | <del>31</del> | <del>121</del> | <del>7.0</del> | <del>33</del> | <del>9</del>  | <del>1.0</del> |
| SC02-14            | 96             | 92             | 1.04            | 0.05081            | 0.00696            | 0.13657            | 0.01830            | 0.01950            | 0.00066            | 0.00606            | 0.00076            | 232            | 293            | 130            | 16            | 124            | 4.0            | 122           | 15            | 1.0            |
| SC02-15            | 64             | 85             | 0.75            | 0.04891            | 0.00550            | 0.13090            | 0.01448            | 0.01941            | 0.00051            | 0.00696            | 0.00080            | 144            | 249            | 125            | 13            | 124            | 3.0            | 140           | 16            | 1.0            |



|         |      |      |      |         |         |         |         |         |         |         |         |     |     |     |    |     |      |     |    |     |
|---------|------|------|------|---------|---------|---------|---------|---------|---------|---------|---------|-----|-----|-----|----|-----|------|-----|----|-----|
| SC02-16 | 194  | 260  | 0.74 | 0.04881 | 0.00371 | 0.12972 | 0.00959 | 0.01927 | 0.00048 | 0.00687 | 0.00115 | 139 | 172 | 124 | 9  | 123 | 3.0  | 138 | 23 | 1.0 |
| SC02-17 | 62   | 74   | 0.84 | 0.05249 | 0.01117 | 0.14327 | 0.02973 | 0.01979 | 0.00101 | 0.00764 | 0.00201 | 307 | 401 | 136 | 26 | 126 | 6.0  | 154 | 40 | 0.9 |
| SC02-18 | 82   | 80   | 1.03 | 0.04876 | 0.00700 | 0.13302 | 0.01874 | 0.01979 | 0.00066 | 0.00520 | 0.00082 | 136 | 288 | 127 | 17 | 126 | 4.0  | 105 | 16 | 1.0 |
| SC02-21 | 106  | 167  | 0.63 | 0.04951 | 0.00638 | 0.13115 | 0.01643 | 0.01921 | 0.00069 | 0.00739 | 0.00176 | 172 | 271 | 125 | 15 | 123 | 4.0  | 149 | 35 | 1.0 |
| SC02-22 | 68   | 93   | 0.73 | 0.04858 | 0.01107 | 0.12972 | 0.02884 | 0.01943 | 0.00108 | 0.00223 | 0.00053 | 128 | 398 | 124 | 26 | 124 | 7.0  | 45  | 11 | 1.0 |
| SC02-23 | 44   | 61   | 0.73 | 0.05058 | 0.01713 | 0.13395 | 0.04440 | 0.01920 | 0.00140 | 0.00364 | 0.00167 | 222 | 587 | 128 | 40 | 123 | 9.0  | 73  | 34 | 1.0 |
| HS01-01 | 297  | 217  | 1.37 | 0.04839 | 0.00200 | 0.12440 | 0.00513 | 0.01863 | 0.00032 | 0.00379 | 0.00018 | 118 | 94  | 119 | 5  | 119 | 2.0  | 76  | 4  | 1.0 |
| HS01-02 | 181  | 236  | 0.77 | 0.04846 | 0.00759 | 0.12408 | 0.01874 | 0.01858 | 0.00085 | 0.00650 | 0.00173 | 122 | 296 | 119 | 17 | 119 | 5.0  | 131 | 35 | 1.0 |
| HS01-03 | 60   | 73   | 0.83 | 0.04860 | 0.00652 | 0.12620 | 0.01658 | 0.01883 | 0.00060 | 0.00682 | 0.00084 | 129 | 271 | 121 | 15 | 120 | 4.0  | 137 | 17 | 1.0 |
| HS01-04 | 318  | 432  | 0.74 | 0.04730 | 0.00379 | 0.12482 | 0.00974 | 0.01910 | 0.00053 | 0.00320 | 0.00042 | 64  | 179 | 119 | 9  | 122 | 3.0  | 65  | 8  | 1.0 |
| HS01-05 | 173  | 124  | 1.39 | 0.04821 | 0.00351 | 0.12063 | 0.00864 | 0.01814 | 0.00038 | 0.00550 | 0.00045 | 110 | 164 | 116 | 8  | 116 | 2.0  | 111 | 9  | 1.0 |
| HS01-06 | 133  | 231  | 0.58 | 0.04759 | 0.00412 | 0.12061 | 0.01014 | 0.01838 | 0.00049 | 0.00616 | 0.00105 | 79  | 195 | 116 | 9  | 117 | 3.0  | 124 | 21 | 1.0 |
| HS01-07 | 26   | 49   | 0.53 | 0.04842 | 0.00914 | 0.12407 | 0.02298 | 0.01858 | 0.00075 | 0.00585 | 0.00122 | 120 | 341 | 119 | 21 | 119 | 5.0  | 118 | 25 | 1.0 |
| HS01-08 | 73   | 98   | 0.75 | 0.04933 | 0.00878 | 0.12386 | 0.02133 | 0.01819 | 0.00090 | 0.00138 | 0.00020 | 164 | 331 | 119 | 19 | 116 | 6.0  | 28  | 4  | 1.0 |
| HS01-09 | 200  | 149  | 1.34 | 0.04952 | 0.00689 | 0.12564 | 0.01698 | 0.01840 | 0.00070 | 0.00636 | 0.00156 | 173 | 284 | 120 | 15 | 118 | 4.0  | 128 | 31 | 1.0 |
| HS01-10 | 250  | 172  | 1.45 | 0.04838 | 0.00369 | 0.12285 | 0.00916 | 0.01842 | 0.00044 | 0.00568 | 0.00079 | 118 | 172 | 118 | 8  | 118 | 3.0  | 114 | 16 | 1.0 |
| HS01-11 | 106  | 145  | 0.73 | 0.05079 | 0.00355 | 0.12841 | 0.00879 | 0.01834 | 0.00042 | 0.00470 | 0.00038 | 231 | 160 | 123 | 8  | 117 | 3.0  | 95  | 8  | 1.0 |
| HS01-12 | 158  | 150  | 1.05 | 0.04833 | 0.00516 | 0.14061 | 0.01458 | 0.02111 | 0.00069 | 0.00251 | 0.00030 | 115 | 236 | 134 | 13 | 135 | 4.0  | 51  | 6  | 1.0 |
| HS01-13 | 155  | 122  | 1.27 | 0.05016 | 0.00319 | 0.12532 | 0.00785 | 0.01812 | 0.00037 | 0.00462 | 0.00029 | 202 | 146 | 120 | 7  | 116 | 2.0  | 93  | 6  | 1.0 |
| HS01-14 | 179  | 127  | 1.41 | 0.04849 | 0.00421 | 0.12229 | 0.01036 | 0.01829 | 0.00046 | 0.00625 | 0.00066 | 123 | 196 | 117 | 9  | 117 | 3.0  | 126 | 13 | 1.0 |
| HS01-15 | 144  | 111  | 1.29 | 0.04853 | 0.00862 | 0.12793 | 0.02206 | 0.01910 | 0.00089 | 0.00435 | 0.00077 | 125 | 328 | 122 | 20 | 122 | 6.0  | 88  | 15 | 1.0 |
| HS01-16 | 253  | 198  | 1.28 | 0.04841 | 0.00329 | 0.12258 | 0.00814 | 0.01837 | 0.00043 | 0.00309 | 0.00029 | 119 | 153 | 117 | 7  | 117 | 3.0  | 62  | 6  | 1.0 |
| HS01-17 | 175  | 171  | 1.02 | 0.04848 | 0.00367 | 0.14355 | 0.04059 | 0.02148 | 0.00055 | 0.00347 | 0.00038 | 123 | 170 | 136 | 9  | 137 | 3.0  | 70  | 8  | 1.0 |
| HS01-18 | 213  | 165  | 1.29 | 0.04855 | 0.00225 | 0.12419 | 0.00574 | 0.01855 | 0.00033 | 0.00427 | 0.00028 | 126 | 105 | 119 | 5  | 118 | 2.0  | 86  | 6  | 1.0 |
| HS01-19 | 238  | 279  | 0.85 | 0.04852 | 0.00189 | 0.12578 | 0.00486 | 0.01880 | 0.00032 | 0.00573 | 0.00050 | 125 | 90  | 120 | 4  | 120 | 2.0  | 115 | 10 | 1.0 |
| HS01-20 | 43   | 40   | 1.08 | 0.04996 | 0.01104 | 0.12548 | 0.02722 | 0.01821 | 0.00083 | 0.00530 | 0.00091 | 193 | 399 | 120 | 25 | 116 | 5.0  | 107 | 18 | 1.0 |
| HS02-01 | 374  | 350  | 1.07 | 0.04704 | 0.00169 | 0.12461 | 0.00449 | 0.01921 | 0.00032 | 0.00552 | 0.00036 | 51  | 78  | 119 | 4  | 123 | 2.0  | 111 | 7  | 1.0 |
| HS02-02 | 503  | 412  | 1.22 | 0.05025 | 0.00133 | 0.12929 | 0.00353 | 0.01866 | 0.00029 | 0.00541 | 0.00029 | 207 | 63  | 123 | 3  | 119 | 2.0  | 109 | 6  | 1.0 |
| HS02-03 | 265  | 240  | 1.10 | 0.04854 | 0.00400 | 0.12796 | 0.01022 | 0.01912 | 0.00052 | 0.00470 | 0.00058 | 126 | 186 | 122 | 9  | 122 | 3.0  | 95  | 12 | 1.0 |
| HS02-04 | 216  | 128  | 1.68 | 0.04959 | 0.01092 | 0.12678 | 0.02698 | 0.01857 | 0.00114 | 0.00209 | 0.00038 | 176 | 395 | 121 | 24 | 119 | 7.0  | 42  | 8  | 1.0 |
| HS02-05 | 11   | 26   | 0.40 | 0.06363 | 0.00470 | 1.05497 | 0.07538 | 0.12031 | 0.00331 | 0.01912 | 0.00298 | 729 | 162 | 731 | 37 | 732 | 19.0 | 383 | 59 | 1.0 |
| HS02-06 | 316  | 274  | 1.15 | 0.04851 | 0.00192 | 0.13613 | 0.00535 | 0.02036 | 0.00036 | 0.00558 | 0.00042 | 124 | 91  | 130 | 5  | 130 | 2.0  | 112 | 8  | 1.0 |
| HS02-07 | 483  | 437  | 1.10 | 0.04838 | 0.00342 | 0.12837 | 0.00880 | 0.01925 | 0.00049 | 0.00490 | 0.00076 | 118 | 159 | 123 | 8  | 123 | 3.0  | 99  | 15 | 1.0 |
| HS02-08 | 408  | 320  | 1.27 | 0.04745 | 0.00421 | 0.12620 | 0.01086 | 0.01930 | 0.00056 | 0.00452 | 0.00079 | 72  | 196 | 121 | 10 | 123 | 4.0  | 91  | 16 | 1.0 |
| HS02-09 | 409  | 115  | 3.54 | 0.04966 | 0.00781 | 0.14448 | 0.02205 | 0.02109 | 0.00093 | 0.00281 | 0.00035 | 179 | 315 | 137 | 20 | 135 | 6.0  | 57  | 7  | 1.0 |
| HS02-10 | 52   | 45   | 1.15 | 0.06416 | 0.00198 | 1.05205 | 0.03282 | 0.11894 | 0.00197 | 0.03311 | 0.00258 | 747 | 67  | 730 | 16 | 724 | 11.0 | 658 | 50 | 1.0 |
| HS02-11 | 400  | 183  | 2.18 | 0.04847 | 0.00594 | 0.12770 | 0.01517 | 0.01911 | 0.00072 | 0.00181 | 0.00023 | 122 | 254 | 122 | 14 | 122 | 5.0  | 37  | 5  | 1.0 |
| HS03-01 | 163  | 204  | 0.80 | 0.04898 | 0.00465 | 0.12853 | 0.01184 | 0.01903 | 0.00056 | 0.00467 | 0.00059 | 147 | 215 | 123 | 11 | 122 | 4.0  | 94  | 12 | 1.0 |
| HS03-02 | 181  | 143  | 1.26 | 0.04924 | 0.00595 | 0.13968 | 0.01634 | 0.02056 | 0.00075 | 0.00170 | 0.00017 | 159 | 256 | 133 | 15 | 131 | 5.0  | 34  | 3  | 1.0 |
| HS03-03 | 97   | 100  | 0.98 | 0.04886 | 0.00508 | 0.14283 | 0.01447 | 0.02120 | 0.00061 | 0.00854 | 0.00106 | 141 | 233 | 136 | 13 | 135 | 4.0  | 172 | 21 | 1.0 |
| HS03-04 | 194  | 138  | 1.41 | 0.05121 | 0.00361 | 0.14074 | 0.00970 | 0.01994 | 0.00047 | 0.00228 | 0.00014 | 250 | 162 | 134 | 9  | 127 | 3.0  | 46  | 3  | 0.9 |
| HS03-05 | 79   | 84   | 0.93 | 0.06632 | 0.00154 | 1.27356 | 0.03103 | 0.13929 | 0.00223 | 0.03082 | 0.00184 | 816 | 50  | 834 | 14 | 841 | 13.0 | 614 | 36 | 1.0 |
| HS03-06 | 120  | 157  | 0.76 | 0.04754 | 0.00424 | 0.12310 | 0.01071 | 0.01879 | 0.00051 | 0.00455 | 0.00052 | 76  | 197 | 118 | 10 | 120 | 3.0  | 92  | 10 | 1.0 |
| HS03-07 | 435  | 247  | 1.76 | 0.05026 | 0.00420 | 0.14292 | 0.01149 | 0.02062 | 0.00057 | 0.00706 | 0.00124 | 207 | 191 | 136 | 10 | 132 | 4.0  | 142 | 25 | 1.0 |
| HS03-08 | 294  | 237  | 1.24 | 0.04897 | 0.00403 | 0.13699 | 0.01094 | 0.02029 | 0.00055 | 0.00419 | 0.00057 | 146 | 186 | 130 | 10 | 129 | 3.0  | 85  | 11 | 1.0 |
| HS03-09 | 91   | 108  | 0.85 | 0.06721 | 0.00173 | 1.25709 | 0.03293 | 0.13568 | 0.00214 | 0.04145 | 0.00398 | 844 | 55  | 827 | 15 | 820 | 12.0 | 821 | 77 | 1.0 |
| HS03-10 | 116  | 145  | 0.80 | 0.04704 | 0.00332 | 0.11998 | 0.00831 | 0.01850 | 0.00042 | 0.00169 | 0.00012 | 51  | 157 | 115 | 8  | 118 | 3.0  | 34  | 2  | 1.0 |
| HS03-12 | 131  | 141  | 0.93 | 0.04956 | 0.00271 | 0.13652 | 0.00735 | 0.01998 | 0.00038 | 0.00588 | 0.00040 | 174 | 125 | 130 | 7  | 128 | 2.0  | 118 | 8  | 1.0 |
| HS03-13 | 791  | 308  | 2.57 | 0.04746 | 0.00658 | 0.12256 | 0.01640 | 0.01873 | 0.00076 | 0.00440 | 0.00094 | 72  | 268 | 117 | 15 | 120 | 5.0  | 89  | 19 | 1.0 |
| HS03-14 | 390  | 295  | 1.32 | 0.04744 | 0.00294 | 0.12254 | 0.00743 | 0.01874 | 0.00042 | 0.00401 | 0.00037 | 71  | 137 | 117 | 7  | 120 | 3.0  | 81  | 7  | 1.0 |
| HS03-15 | 120  | 106  | 1.13 | 0.04641 | 0.00756 | 0.12897 | 0.02041 | 0.02017 | 0.00085 | 0.00604 | 0.00117 | 19  | 291 | 123 | 18 | 129 | 5.0  | 122 | 24 | 1.0 |
| HS03-16 | 129  | 213  | 0.60 | 0.04861 | 0.00187 | 0.12532 | 0.00483 | 0.01870 | 0.00031 | 0.00316 | 0.00017 | 129 | 89  | 120 | 4  | 119 | 2.0  | 64  | 3  | 1.0 |
| HS03-17 | 133  | 163  | 0.82 | 0.04780 | 0.00249 | 0.12585 | 0.00651 | 0.01910 | 0.00037 | 0.00280 | 0.00017 | 89  | 116 | 120 | 6  | 122 | 2.0  | 57  | 3  | 1.0 |
| HS03-18 | 1133 | 2253 | 0.50 | 0.04887 | 0.00131 | 0.12632 | 0.00347 | 0.01875 | 0.00031 | 0.00474 | 0.00050 | 142 | 64  | 121 | 3  | 120 | 2.0  | 96  | 10 | 1.0 |
| HS03-19 | 578  | 455  | 1.27 | 0.04897 | 0.00302 | 0.13666 | 0.00820 | 0.02023 | 0.00051 | 0.00169 | 0.00015 | 146 | 140 | 130 | 7  | 129 | 3.0  | 34  | 3  | 1.0 |
| HS03-20 | 2883 | 1171 | 2.46 | 0.04816 | 0.00343 | 0.13283 | 0.00913 | 0.02000 | 0.00054 | 0.00236 | 0.00042 | 107 | 160 | 127 | 8  | 128 | 3.0  | 48  | 8  | 1.0 |
| HS03-21 | 361  | 411  | 0.88 | 0.04912 | 0.00348 | 0.12508 | 0.00858 | 0.01849 | 0.00049 | 0.00260 | 0.00035 | 154 | 161 | 120 | 8  | 118 | 3.0  | 52  | 7  | 1.0 |

#### M8, W Puijiang (Li JH et al., 2014)

|           |     |     |      |        |     |        |     |         |     |      |     |       |     |
|-----------|-----|-----|------|--------|-----|--------|-----|---------|-----|------|-----|-------|-----|
| zj36-1.1  | 243 | 337 | 0.75 | 0.0487 | 9.7 | 0.137  | 9.8 | 0.02045 | 1.4 | 135  | 230 | 130.5 | 1.8 |
| zj36-1.2  | 702 | 359 | 2.02 | 0.0472 | 13  | 0.133  | 13  | 0.0205  | 1.5 | 57   | 310 | 130.8 | 1.9 |
| zj36-1.3  | 156 | 296 | 0.55 | 0.0383 | 19  | 0.108  | 19  | 0.02038 | 1.5 | -466 | 500 | 130.1 | 2.0 |
| zj36-1.4  | 173 | 354 | 0.51 | 0.0545 | 13  | 0.151  | 13  | 0.0201  | 1.5 | 391  | 300 | 128.3 | 1.9 |
| zj36-1.5  | 246 | 361 | 0.7  | 0.0503 | 11  | 0.208  | 11  | 0.02996 | 1.4 | 210  | 250 | 190.3 | 2.5 |
| zj36-1.6  | 553 | 441 | 1.3  | 0.0502 | 14  | 0.138  | 14  | 0.01995 | 1.5 | 204  | 330 | 127.3 | 1.9 |
| zj36-1.7  | 246 | 284 | 0.9  | 0.046  | 33  | 0.128  | 33  | 0.02015 | 2.5 | 3    | 790 | 128.6 | 3.2 |
| zj36-1.8  | 701 | 900 | 0.81 | 0.0463 | 6.4 | 0.1301 | 6.5 | 0.02037 | 1.1 | 15   | 150 | 130   | 1.4 |
| zj36-1.9  | 205 | 434 | 0.49 | 0.0476 | 4.1 | 0.1351 | 4.3 | 0.02057 | 1.2 | 81   | 97  | 131.3 | 1.6 |
| zj36-1.10 | 154 | 106 | 1.5  | 0.061  | 22  | 0.169  | 22  | 0.0201  | 2.2 | 642  | 470 | 128.3 | 2.8 |
| zj36-1.11 | 271 | 380 | 0.74 | 0.0513 | 10  | 0.145  | 10  | 0.02055 | 1.5 | 256  | 230 | 131.1 | 1.9 |
| zj36-1.12 | 123 | 175 | 0.73 | 0.055  | 19  | 0.154  | 19  | 0.0201  | 2   | 430  | 430 | 128.3 | 2.6 |
| zj36-1.13 | 202 | 240 | 0.87 | 0.0491 | 20  | 0.137  | 20  | 0.02029 | 1.7 | 152  | 460 | 129.5 | 2.3 |
| zj36-1.14 | 148 | 175 | 0.87 | 0.046  | 28  | 0.126  | 28  | 0.02014 | 2.1 | -27  | 680 | 128.6 | 2.7 |



|         |      |     |      |         |         |         |         |         |         |         |         |     |     |     |    |     |     |     |    |     |
|---------|------|-----|------|---------|---------|---------|---------|---------|---------|---------|---------|-----|-----|-----|----|-----|-----|-----|----|-----|
| LC01-06 | 264  | 375 | 0.70 | 0.04960 | 0.00178 | 0.13858 | 0.00499 | 0.02027 | 0.00033 | 0.00618 | 0.00053 | 176 | 85  | 132 | 4  | 129 | 2.0 | 125 | 11 | 1.0 |
| LC01-07 | 203  | 317 | 0.64 | 0.04864 | 0.00184 | 0.13865 | 0.00529 | 0.02068 | 0.00035 | 0.00382 | 0.00023 | 131 | 88  | 132 | 5  | 132 | 2.0 | 77  | 5  | 1.0 |
| LC01-08 | 154  | 100 | 1.54 | 0.04795 | 0.00938 | 0.13526 | 0.02586 | 0.02047 | 0.00090 | 0.00701 | 0.00166 | 97  | 348 | 129 | 23 | 131 | 6.0 | 141 | 33 | 1.0 |
| LC01-09 | 177  | 335 | 0.53 | 0.04923 | 0.00317 | 0.13915 | 0.00880 | 0.02050 | 0.00046 | 0.00491 | 0.00068 | 159 | 146 | 132 | 8  | 131 | 3.0 | 99  | 14 | 1.0 |
| LC01-10 | 362  | 664 | 0.55 | 0.04805 | 0.00514 | 0.13483 | 0.01400 | 0.02042 | 0.00077 | 0.00147 | 0.00027 | 102 | 233 | 128 | 13 | 130 | 5.0 | 30  | 5  | 1.0 |
| LC01-11 | 238  | 296 | 0.80 | 0.04885 | 0.00289 | 0.13702 | 0.00802 | 0.02035 | 0.00043 | 0.00281 | 0.00018 | 141 | 134 | 130 | 7  | 130 | 3.0 | 57  | 4  | 1.0 |
| LC01-12 | 360  | 420 | 0.86 | 0.04744 | 0.00171 | 0.13470 | 0.00491 | 0.02059 | 0.00034 | 0.00535 | 0.00037 | 71  | 80  | 128 | 4  | 131 | 2.0 | 108 | 7  | 1.0 |
| LC01-13 | 91   | 124 | 0.73 | 0.04788 | 0.00522 | 0.13747 | 0.01471 | 0.02083 | 0.00055 | 0.00759 | 0.00107 | 93  | 232 | 131 | 13 | 133 | 3.0 | 153 | 21 | 1.0 |
| LC01-14 | 175  | 272 | 0.64 | 0.05003 | 0.00256 | 0.14066 | 0.00707 | 0.02039 | 0.00037 | 0.00730 | 0.00082 | 196 | 119 | 134 | 6  | 130 | 2.0 | 147 | 16 | 1.0 |
| LC01-15 | 65   | 85  | 0.76 | 0.04907 | 0.00504 | 0.14097 | 0.01435 | 0.02084 | 0.00046 | 0.00641 | 0.00067 | 151 | 230 | 134 | 13 | 133 | 3.0 | 129 | 13 | 1.0 |
| LC01-16 | 539  | 649 | 0.83 | 0.04883 | 0.00205 | 0.13744 | 0.00571 | 0.02042 | 0.00037 | 0.00585 | 0.00074 | 140 | 97  | 131 | 5  | 130 | 2.0 | 118 | 15 | 1.0 |
| LC01-17 | 553  | 675 | 0.82 | 0.04968 | 0.00238 | 0.13891 | 0.00655 | 0.02028 | 0.00040 | 0.00533 | 0.00069 | 180 | 111 | 132 | 6  | 129 | 3.0 | 107 | 14 | 1.0 |
| LC01-18 | 178  | 337 | 0.53 | 0.04935 | 0.00578 | 0.14051 | 0.01594 | 0.02067 | 0.00071 | 0.00494 | 0.00111 | 164 | 254 | 133 | 14 | 132 | 4.0 | 100 | 22 | 1.0 |
| LC01-19 | 303  | 287 | 1.05 | 0.04939 | 0.00685 | 0.13802 | 0.01855 | 0.02027 | 0.00083 | 0.00333 | 0.00071 | 166 | 283 | 131 | 17 | 129 | 5.0 | 67  | 14 | 1.0 |
| LC01-20 | 95   | 116 | 0.82 | 0.05013 | 0.00389 | 0.13994 | 0.01076 | 0.02025 | 0.00040 | 0.00544 | 0.00058 | 201 | 177 | 133 | 10 | 129 | 3.0 | 110 | 12 | 1.0 |
| LC02-01 | 581  | 394 | 1.47 | 0.04847 | 0.00192 | 0.14280 | 0.00566 | 0.02137 | 0.00038 | 0.00602 | 0.00053 | 122 | 91  | 136 | 5  | 136 | 2.0 | 121 | 11 | 1.0 |
| LC02-02 | 426  | 432 | 0.99 | 0.04920 | 0.00440 | 0.14408 | 0.01247 | 0.02124 | 0.00063 | 0.00460 | 0.00083 | 157 | 203 | 137 | 11 | 135 | 4.0 | 93  | 17 | 1.0 |
| LC02-03 | 986  | 584 | 1.69 | 0.04921 | 0.00268 | 0.14396 | 0.00767 | 0.02122 | 0.00046 | 0.00507 | 0.00066 | 158 | 124 | 137 | 7  | 135 | 3.0 | 102 | 13 | 1.0 |
| LC02-04 | 466  | 494 | 0.94 | 0.04806 | 0.00193 | 0.14057 | 0.00561 | 0.02121 | 0.00038 | 0.00589 | 0.00066 | 102 | 91  | 134 | 5  | 135 | 2.0 | 119 | 13 | 1.0 |
| LC02-05 | 626  | 393 | 1.59 | 0.04926 | 0.00543 | 0.14483 | 0.01541 | 0.02133 | 0.00077 | 0.00254 | 0.00045 | 160 | 244 | 137 | 14 | 136 | 5.0 | 51  | 9  | 1.0 |
| LC02-06 | 592  | 472 | 1.26 | 0.04879 | 0.00289 | 0.14403 | 0.00829 | 0.02141 | 0.00046 | 0.00670 | 0.00127 | 138 | 134 | 137 | 7  | 137 | 3.0 | 135 | 25 | 1.0 |
| LC02-07 | 352  | 243 | 1.45 | 0.04892 | 0.00458 | 0.14489 | 0.01317 | 0.02149 | 0.00067 | 0.00159 | 0.00020 | 144 | 212 | 137 | 12 | 137 | 4.0 | 32  | 4  | 1.0 |
| LC02-08 | 293  | 233 | 1.26 | 0.04918 | 0.00455 | 0.14532 | 0.01307 | 0.02143 | 0.00061 | 0.00667 | 0.00137 | 156 | 210 | 138 | 12 | 137 | 4.0 | 134 | 28 | 1.0 |
| LC02-09 | 404  | 316 | 1.28 | 0.04972 | 0.00379 | 0.14612 | 0.01078 | 0.02131 | 0.00054 | 0.00648 | 0.00148 | 182 | 174 | 138 | 10 | 136 | 3.0 | 131 | 30 | 1.0 |
| LC02-10 | 483  | 341 | 1.42 | 0.04821 | 0.00176 | 0.14097 | 0.00521 | 0.02121 | 0.00037 | 0.00449 | 0.00040 | 110 | 84  | 134 | 5  | 135 | 2.0 | 91  | 8  | 1.0 |
| LC02-11 | 1289 | 752 | 1.71 | 0.04822 | 0.00455 | 0.14210 | 0.01293 | 0.02137 | 0.00068 | 0.00513 | 0.00112 | 110 | 210 | 135 | 11 | 136 | 4.0 | 103 | 23 | 1.0 |
| LC02-12 | 599  | 271 | 2.21 | 0.05004 | 0.00547 | 0.14425 | 0.01521 | 0.02095 | 0.00077 | 0.00142 | 0.00012 | 197 | 245 | 137 | 13 | 134 | 5.0 | 29  | 2  | 1.0 |
| LC02-13 | 526  | 474 | 1.11 | 0.04801 | 0.00188 | 0.14025 | 0.00547 | 0.02119 | 0.00037 | 0.00667 | 0.00068 | 100 | 89  | 133 | 5  | 135 | 2.0 | 134 | 14 | 1.0 |
| LC02-14 | 517  | 488 | 1.06 | 0.04949 | 0.00141 | 0.14367 | 0.00420 | 0.02105 | 0.00034 | 0.00546 | 0.00038 | 171 | 68  | 136 | 4  | 134 | 2.0 | 110 | 8  | 1.0 |
| LC02-15 | 639  | 485 | 1.32 | 0.04978 | 0.00472 | 0.14648 | 0.01345 | 0.02134 | 0.00067 | 0.00411 | 0.00072 | 185 | 216 | 139 | 12 | 136 | 4.0 | 83  | 14 | 1.0 |
| LC02-16 | 645  | 430 | 1.50 | 0.04856 | 0.00295 | 0.14435 | 0.00854 | 0.02156 | 0.00048 | 0.00679 | 0.00107 | 127 | 137 | 137 | 8  | 138 | 3.0 | 137 | 21 | 1.0 |
| LC02-17 | 885  | 776 | 1.14 | 0.04898 | 0.00121 | 0.14341 | 0.00374 | 0.02124 | 0.00034 | 0.00487 | 0.00034 | 147 | 59  | 136 | 3  | 135 | 2.0 | 98  | 7  | 1.0 |
| LC02-18 | 1651 | 844 | 1.96 | 0.04797 | 0.00292 | 0.14025 | 0.00834 | 0.02120 | 0.00052 | 0.00247 | 0.00029 | 98  | 136 | 133 | 7  | 135 | 3.0 | 50  | 6  | 1.0 |
| LC02-19 | 602  | 422 | 1.43 | 0.05224 | 0.00555 | 0.15143 | 0.01545 | 0.02102 | 0.00078 | 0.00180 | 0.00026 | 296 | 243 | 143 | 14 | 134 | 5.0 | 36  | 5  | 0.9 |
| LC02-20 | 432  | 421 | 1.02 | 0.04736 | 0.00136 | 0.13992 | 0.00414 | 0.02143 | 0.00035 | 0.00318 | 0.00017 | 67  | 64  | 133 | 4  | 137 | 2.0 | 64  | 3  | 1.0 |
| LC02-21 | 270  | 162 | 1.66 | 0.04666 | 0.00536 | 0.13155 | 0.01477 | 0.02045 | 0.00064 | 0.00304 | 0.00036 | 32  | 232 | 125 | 13 | 130 | 4.0 | 61  | 7  | 1.0 |
| LC02-22 | 503  | 510 | 0.99 | 0.04893 | 0.00172 | 0.14354 | 0.00510 | 0.02128 | 0.00037 | 0.00511 | 0.00047 | 144 | 83  | 136 | 5  | 136 | 2.0 | 103 | 9  | 1.0 |
| LC02-23 | 429  | 338 | 1.27 | 0.04912 | 0.00200 | 0.14350 | 0.00586 | 0.02119 | 0.00038 | 0.00472 | 0.00042 | 154 | 95  | 136 | 5  | 135 | 2.0 | 95  | 8  | 1.0 |
| LC02-24 | 362  | 363 | 1.00 | 0.05010 | 0.00183 | 0.14694 | 0.00541 | 0.02127 | 0.00037 | 0.00443 | 0.00037 | 200 | 87  | 139 | 5  | 136 | 2.0 | 89  | 7  | 1.0 |
| LC02-25 | 1163 | 606 | 1.92 | 0.04884 | 0.00205 | 0.14388 | 0.00602 | 0.02137 | 0.00042 | 0.00342 | 0.00033 | 140 | 97  | 136 | 5  | 136 | 3.0 | 69  | 7  | 1.0 |
| HJ01-02 | 107  | 134 | 0.80 | 0.04878 | 0.00387 | 0.13708 | 0.01071 | 0.02038 | 0.00048 | 0.00428 | 0.00034 | 137 | 179 | 130 | 10 | 130 | 3.0 | 86  | 7  | 1.0 |
| HJ01-03 | 58   | 94  | 0.62 | 0.05009 | 0.00758 | 0.14100 | 0.02084 | 0.02041 | 0.00076 | 0.00388 | 0.00076 | 199 | 305 | 134 | 19 | 130 | 5.0 | 78  | 15 | 1.0 |
| HJ01-04 | 299  | 126 | 2.38 | 0.04907 | 0.00463 | 0.13588 | 0.01255 | 0.02008 | 0.00051 | 0.00510 | 0.00058 | 151 | 214 | 129 | 11 | 128 | 3.0 | 103 | 12 | 1.0 |
| HJ01-05 | 62   | 25  | 2.54 | 0.04716 | 0.01503 | 0.13403 | 0.04239 | 0.02061 | 0.00089 | 0.00546 | 0.00053 | 57  | 524 | 128 | 38 | 132 | 6.0 | 110 | 11 | 1.0 |
| HJ01-06 | 124  | 141 | 0.88 | 0.04890 | 0.00338 | 0.13467 | 0.00916 | 0.01997 | 0.00041 | 0.00566 | 0.00055 | 143 | 157 | 128 | 8  | 127 | 3.0 | 114 | 11 | 1.0 |
| HJ01-07 | 73   | 91  | 0.80 | 0.04843 | 0.00472 | 0.13743 | 0.01320 | 0.02058 | 0.00049 | 0.00637 | 0.00070 | 120 | 217 | 131 | 12 | 131 | 3.0 | 128 | 14 | 1.0 |
| HJ01-08 | 64   | 92  | 0.70 | 0.04886 | 0.00614 | 0.13609 | 0.01679 | 0.02020 | 0.00062 | 0.00382 | 0.00046 | 141 | 261 | 130 | 15 | 129 | 4.0 | 77  | 9  | 1.0 |
| HJ01-09 | 69   | 94  | 0.74 | 0.04999 | 0.00858 | 0.13814 | 0.02313 | 0.02004 | 0.00086 | 0.00335 | 0.00060 | 195 | 326 | 131 | 21 | 128 | 5.0 | 68  | 12 | 1.0 |
| HJ01-10 | 107  | 135 | 0.79 | 0.04881 | 0.00411 | 0.13359 | 0.01103 | 0.01985 | 0.00046 | 0.00600 | 0.00078 | 139 | 190 | 127 | 10 | 127 | 3.0 | 121 | 16 | 1.0 |
| HJ01-11 | 520  | 764 | 0.68 | 0.04882 | 0.00152 | 0.13777 | 0.00440 | 0.02045 | 0.00037 | 0.00256 | 0.00015 | 139 | 74  | 131 | 4  | 130 | 2.0 | 52  | 3  | 1.0 |
| HJ01-12 | 424  | 201 | 2.11 | 0.05120 | 0.00271 | 0.14062 | 0.00736 | 0.01992 | 0.00038 | 0.00510 | 0.00035 | 250 | 124 | 134 | 7  | 127 | 2.0 | 103 | 7  | 0.9 |
| HJ01-13 | 88   | 115 | 0.77 | 0.04912 | 0.00497 | 0.13819 | 0.01369 | 0.02039 | 0.00058 | 0.00304 | 0.00029 | 154 | 227 | 131 | 12 | 130 | 4.0 | 61  | 6  | 1.0 |
| HJ01-14 | 142  | 153 | 0.92 | 0.05007 | 0.00408 | 0.13923 | 0.01112 | 0.02017 | 0.00049 | 0.00436 | 0.00039 | 198 | 186 | 132 | 10 | 129 | 3.0 | 88  | 8  | 1.0 |
| HJ01-15 | 106  | 71  | 1.49 | 0.04915 | 0.00517 | 0.13723 | 0.01427 | 0.02025 | 0.00048 | 0.00474 | 0.00036 | 155 | 236 | 131 | 13 | 129 | 3.0 | 96  | 7  | 1.0 |
| HJ01-16 | 55   | 68  | 0.82 | 0.04999 | 0.00761 | 0.15611 | 0.02326 | 0.02265 | 0.00081 | 0.00553 | 0.00093 | 495 | 307 | 147 | 20 | 144 | 5.0 | 111 | 49 | 1.0 |
| HJ01-17 | 47   | 71  | 0.66 | 0.05066 | 0.00993 | 0.14116 | 0.02706 | 0.02021 | 0.00092 | 0.00693 | 0.00128 | 225 | 366 | 134 | 24 | 129 | 6.0 | 140 | 26 | 1.0 |
| HJ01-18 | 150  | 149 | 1.01 | 0.04928 | 0.00384 | 0.14132 | 0.01082 | 0.02080 | 0.00048 | 0.00507 | 0.00048 | 161 | 177 | 134 | 10 | 133 | 3.0 | 102 | 10 | 1.0 |
| HJ01-19 | 80   | 89  | 0.89 | 0.05288 | 0.00986 | 0.14909 | 0.02710 | 0.02044 | 0.00094 | 0.00404 | 0.00082 | 324 | 376 | 141 | 24 | 130 | 6.0 | 81  | 17 | 0.9 |
| HJ01-20 | 120  | 138 | 0.87 | 0.04839 | 0.00316 | 0.13498 | 0.00871 | 0.02023 | 0.00039 | 0.00578 | 0.00058 | 118 | 147 | 129 | 8  | 129 | 2.0 | 116 | 12 | 1.0 |
| HJ01-21 | 90   | 117 | 0.77 | 0.05033 | 0.01122 | 0.14158 | 0.03046 | 0.02038 | 0.00129 | 0.00185 | 0.00052 | 210 | 403 | 134 | 27 | 130 | 8.0 | 37  | 40 | 1.0 |
| HJ01-22 | 75   | 72  | 1.04 | 0.04908 | 0.00562 | 0.15409 | 0.01737 | 0.02277 | 0.00064 | 0.00399 |         |     |     |     |    |     |     |     |    |     |



|            |      |      |      |         |         |         |         |         |         |         |         |     |     |     |    |       |      |     |    |     |
|------------|------|------|------|---------|---------|---------|---------|---------|---------|---------|---------|-----|-----|-----|----|-------|------|-----|----|-----|
| HJ05-02    | 2812 | 6645 | 0.42 | 0.05016 | 0.00340 | 0.13978 | 0.00914 | 0.02024 | 0.00059 | 0.00390 | 0.00089 | 202 | 155 | 133 | 8  | 129   | 4.0  | 79  | 18 | 1.0 |
| HJ05-04    | 299  | 490  | 0.61 | 0.04837 | 0.00159 | 0.13446 | 0.00450 | 0.02017 | 0.00033 | 0.00439 | 0.00029 | 117 | 76  | 128 | 4  | 129   | 2.0  | 89  | 6  | 1.0 |
| HJ05-05    | 2750 | 3854 | 0.71 | 0.05107 | 0.00091 | 0.14331 | 0.00286 | 0.02036 | 0.00030 | 0.00619 | 0.00050 | 244 | 42  | 136 | 3  | 130   | 2.0  | 125 | 10 | 1.0 |
| HJ05-06    | 2722 | 4084 | 0.67 | 0.04842 | 0.00101 | 0.13688 | 0.00314 | 0.02051 | 0.00033 | 0.00360 | 0.00026 | 120 | 50  | 130 | 3  | 131   | 2.0  | 73  | 5  | 1.0 |
| HJ05-07    | 2727 | 3583 | 0.76 | 0.05054 | 0.00217 | 0.14216 | 0.00602 | 0.02039 | 0.00039 | 0.00605 | 0.00123 | 220 | 101 | 135 | 5  | 130   | 2.0  | 122 | 25 | 1.0 |
| HJ05-08    | 1557 | 2396 | 0.65 | 0.04932 | 0.00163 | 0.15714 | 0.00535 | 0.02312 | 0.00045 | 0.00206 | 0.00017 | 163 | 79  | 148 | 5  | 147   | 3.0  | 42  | 3  | 1.0 |
| HJ05-09    | 2430 | 3077 | 0.79 | 0.04989 | 0.00162 | 0.13860 | 0.00458 | 0.02014 | 0.00034 | 0.00534 | 0.00083 | 190 | 77  | 132 | 4  | 129   | 2.0  | 108 | 17 | 1.0 |
| HJ05-10    | 2401 | 3090 | 0.78 | 0.04920 | 0.00077 | 0.14692 | 0.00267 | 0.02166 | 0.00032 | 0.00513 | 0.00036 | 157 | 37  | 139 | 2  | 138   | 2.0  | 103 | 7  | 1.0 |
| HJ05-11    | 721  | 1290 | 0.56 | 0.04864 | 0.00139 | 0.13845 | 0.00416 | 0.02066 | 0.00036 | 0.00332 | 0.00029 | 131 | 68  | 132 | 4  | 132   | 2.0  | 67  | 6  | 1.0 |
| HJ05-12    | 3107 | 4886 | 0.64 | 0.04817 | 0.00128 | 0.13534 | 0.00384 | 0.02038 | 0.00037 | 0.00333 | 0.00031 | 108 | 63  | 129 | 3  | 130   | 2.0  | 67  | 6  | 1.0 |
| HJ05-13    | 966  | 1243 | 0.78 | 0.04945 | 0.00144 | 0.13967 | 0.00420 | 0.02049 | 0.00034 | 0.00585 | 0.00077 | 169 | 70  | 133 | 4  | 131   | 2.0  | 118 | 15 | 1.0 |
| HJ05-14    | 2993 | 4418 | 0.68 | 0.04863 | 0.00117 | 0.13726 | 0.00354 | 0.02048 | 0.00033 | 0.00714 | 0.00102 | 130 | 58  | 131 | 3  | 131   | 2.0  | 144 | 20 | 1.0 |
| HJ05-15    | 1424 | 1980 | 0.72 | 0.04835 | 0.00086 | 0.15652 | 0.00317 | 0.02348 | 0.00036 | 0.00481 | 0.00040 | 116 | 43  | 148 | 3  | 150   | 2.0  | 97  | 8  | 1.0 |
| SC01-01    | 251  | 300  | 0.84 | 0.04913 | 0.00173 | 0.13786 | 0.00492 | 0.02035 | 0.00034 | 0.00463 | 0.00027 | 154 | 83  | 131 | 4  | 130   | 2.0  | 93  | 5  | 1.0 |
| SC01-02    | 377  | 300  | 1.26 | 0.05029 | 0.00205 | 0.15586 | 0.00631 | 0.02248 | 0.00039 | 0.00689 | 0.00061 | 208 | 97  | 147 | 6  | 143   | 2.0  | 139 | 12 | 1.0 |
| SC01-03    | 1633 | 1034 | 1.58 | 0.04888 | 0.00134 | 0.13760 | 0.00392 | 0.02042 | 0.00034 | 0.00382 | 0.00025 | 142 | 66  | 131 | 3  | 130   | 2.0  | 77  | 5  | 1.0 |
| SC01-04    | 541  | 210  | 2.58 | 0.04898 | 0.00254 | 0.13696 | 0.00705 | 0.02028 | 0.00040 | 0.00348 | 0.00022 | 147 | 118 | 130 | 6  | 129   | 3.0  | 70  | 4  | 1.0 |
| SC01-05    | 574  | 341  | 1.68 | 0.04925 | 0.00347 | 0.14015 | 0.00962 | 0.02064 | 0.00051 | 0.00432 | 0.00054 | 160 | 160 | 133 | 9  | 132   | 3.0  | 87  | 11 | 1.0 |
| SC01-06    | 89   | 102  | 0.88 | 0.05073 | 0.00701 | 0.13861 | 0.01870 | 0.01982 | 0.00069 | 0.00669 | 0.00123 | 229 | 292 | 132 | 17 | 127   | 4.0  | 135 | 25 | 1.0 |
| SC01-07    | 306  | 209  | 1.46 | 0.04934 | 0.00466 | 0.14149 | 0.01300 | 0.02080 | 0.00063 | 0.00240 | 0.00027 | 164 | 214 | 134 | 12 | 133   | 4.0  | 48  | 5  | 1.0 |
| SC01-08    | 390  | 672  | 0.58 | 0.04808 | 0.00147 | 0.13771 | 0.00429 | 0.02077 | 0.00034 | 0.00545 | 0.00054 | 103 | 71  | 131 | 4  | 133   | 2.0  | 110 | 11 | 1.0 |
| SC01-09    | 382  | 307  | 1.24 | 0.04676 | 0.00178 | 0.13235 | 0.00506 | 0.02053 | 0.00034 | 0.00559 | 0.00054 | 37  | 82  | 126 | 5  | 131   | 2.0  | 113 | 11 | 1.0 |
| SC01-10    | 180  | 246  | 0.73 | 0.04809 | 0.00267 | 0.13517 | 0.00735 | 0.02038 | 0.00040 | 0.00717 | 0.00115 | 104 | 125 | 129 | 7  | 130   | 3.0  | 144 | 23 | 1.0 |
| SC01-11    | 274  | 235  | 1.17 | 0.04851 | 0.00215 | 0.13664 | 0.00606 | 0.02043 | 0.00036 | 0.00468 | 0.00028 | 124 | 101 | 130 | 5  | 130   | 2.0  | 94  | 6  | 1.0 |
| SC01-12    | 187  | 238  | 0.79 | 0.04922 | 0.00286 | 0.14010 | 0.00806 | 0.02064 | 0.00044 | 0.00338 | 0.00025 | 158 | 133 | 133 | 7  | 132   | 3.0  | 68  | 5  | 1.0 |
| SC01-13    | 409  | 513  | 0.80 | 0.04838 | 0.00170 | 0.13911 | 0.00497 | 0.02086 | 0.00038 | 0.00272 | 0.00015 | 118 | 81  | 132 | 4  | 133   | 2.0  | 55  | 3  | 1.0 |
| SC01-14    | 682  | 287  | 2.37 | 0.04845 | 0.00204 | 0.13652 | 0.00574 | 0.02043 | 0.00036 | 0.00517 | 0.00037 | 121 | 96  | 130 | 5  | 130   | 2.0  | 104 | 7  | 1.0 |
| SC01-15    | 672  | 463  | 1.45 | 0.05085 | 0.00142 | 0.14087 | 0.00405 | 0.02009 | 0.00032 | 0.00542 | 0.00039 | 234 | 66  | 134 | 4  | 128   | 2.0  | 109 | 8  | 1.0 |
| SC01-16    | 140  | 190  | 0.74 | 0.04918 | 0.00554 | 0.13632 | 0.01491 | 0.02010 | 0.00065 | 0.00493 | 0.00093 | 156 | 250 | 130 | 13 | 128   | 4.0  | 99  | 19 | 1.0 |
| SC01-17    | 152  | 212  | 0.72 | 0.04907 | 0.00502 | 0.13590 | 0.01354 | 0.02009 | 0.00061 | 0.00476 | 0.00076 | 151 | 229 | 129 | 12 | 128   | 4.0  | 96  | 15 | 1.0 |
| SC01-19    | 129  | 171  | 0.76 | 0.04835 | 0.00414 | 0.13622 | 0.01134 | 0.02043 | 0.00052 | 0.00748 | 0.00129 | 116 | 193 | 130 | 10 | 130   | 3.0  | 151 | 26 | 1.0 |
| SC01-20    | 458  | 299  | 1.53 | 0.04873 | 0.00350 | 0.13711 | 0.00962 | 0.02041 | 0.00050 | 0.00444 | 0.00065 | 135 | 162 | 130 | 9  | 130   | 3.0  | 90  | 13 | 1.0 |
| SC01-21    | 83   | 74   | 1.12 | 0.05602 | 0.00212 | 0.57601 | 0.02189 | 0.07458 | 0.00131 | 0.01767 | 0.00163 | 453 | 86  | 462 | 14 | 464   | 8.0  | 354 | 32 | 1.0 |
| T0003-1.1  | 117  | 157  | 0.75 | 0.0483  | 0.0094  | 0.1400  | 0.0096  | 0.0210  | 0.0020  |         |         |     |     |     |    | 133.9 | 3.2  |     |    |     |
| T0003-2.1  | 138  | 411  | 0.34 | 0.0467  | 0.0044  | 0.1401  | 0.0047  | 0.0217  | 0.0017  |         |         |     |     |     |    | 138.7 | 2.4  |     |    |     |
| T0003-3.1  | 226  | 120  | 1.88 | 0.0390  | 0.0061  | 0.8990  | 0.0063  | 0.1669  | 0.0018  |         |         |     |     |     |    | 996.0 | 27.0 |     |    |     |
| T0003-4.1  | 41   | 74   | 0.55 | 0.0720  | 0.0510  | 0.2200  | 0.0510  | 0.0227  | 0.0028  |         |         |     |     |     |    | 144.9 | 8.0  |     |    |     |
| T0003-5.1  | 31   | 62   | 0.50 | 0.0658  | 0.0042  | 1.3860  | 0.0047  | 0.1527  | 0.0022  |         |         |     |     |     |    | 916.0 | 21.0 |     |    |     |
| T0003-6.1  | 447  | 926  | 0.48 | 0.0592  | 0.0100  | 0.1730  | 0.0110  | 0.0212  | 0.0015  |         |         |     |     |     |    | 135.1 | 2.5  |     |    |     |
| T0003-7.1  | 151  | 306  | 0.49 | 0.0409  | 0.0087  | 0.1190  | 0.0089  | 0.0211  | 0.0018  |         |         |     |     |     |    | 134.4 | 3.1  |     |    |     |
| T0003-8.1  | 229  | 409  | 0.56 | 0.0573  | 0.0040  | 0.1683  | 0.0044  | 0.0213  | 0.0018  |         |         |     |     |     |    | 135.9 | 2.6  |     |    |     |
| T0003-9.1  | 1757 | 2167 | 0.81 | 0.0866  | 0.0030  | 0.2588  | 0.0033  | 0.0217  | 0.0015  |         |         |     |     |     |    | 138.2 | 3.2  |     |    |     |
| T0003-10.1 | 365  | 744  | 0.49 | 0.0545  | 0.0039  | 0.1553  | 0.0042  | 0.0207  | 0.0015  |         |         |     |     |     |    | 131.9 | 2.4  |     |    |     |
| T0003-11.1 | 162  | 214  | 0.76 | 0.0679  | 0.0018  | 1.2560  | 0.0024  | 0.1342  | 0.0016  |         |         |     |     |     |    | 812.0 | 14.0 |     |    |     |
| T0003-13.1 | 87   | 181  | 0.48 | 0.0525  | 0.0059  | 0.1528  | 0.0062  | 0.0211  | 0.0019  |         |         |     |     |     |    | 134.6 | 2.8  |     |    |     |
| T0003-14.1 | 312  | 711  | 0.44 | 0.0543  | 0.0034  | 0.1573  | 0.0037  | 0.0210  | 0.0016  |         |         |     |     |     |    | 134.1 | 2.2  |     |    |     |
| T0003-15.1 | 462  | 700  | 0.66 | 0.0606  | 0.0039  | 0.1790  | 0.0042  | 0.0214  | 0.0016  |         |         |     |     |     |    | 136.7 | 2.4  |     |    |     |
| T0003-16.1 | 61   | 113  | 0.54 | 0.0557  | 0.0080  | 0.1720  | 0.0083  | 0.0224  | 0.0021  |         |         |     |     |     |    | 142.8 | 3.4  |     |    |     |
| T0003-17.1 | 59   | 103  | 0.57 | 0.0697  | 0.0039  | 1.3820  | 0.0044  | 0.1439  | 0.0020  |         |         |     |     |     |    | 866.0 | 18.0 |     |    |     |
| T0003-18.1 | 136  | 254  | 0.54 | 0.0456  | 0.0110  | 0.1820  | 0.0110  | 0.0289  | 0.0021  |         |         |     |     |     |    | 183.8 | 4.5  |     |    |     |
| T0004-1.1  | 114  | 98   | 1.16 | 0.0550  | 0.0320  | 0.1690  | 0.0320  | 0.0223  | 0.0023  |         |         |     |     |     |    | 141.9 | 5.0  |     |    |     |
| T0004-2.1  | 329  | 432  | 0.76 | 0.0483  | 0.0041  | 0.1406  | 0.0045  | 0.0211  | 0.0019  |         |         |     |     |     |    | 134.6 | 2.9  |     |    |     |
| T0004-3.1  | 338  | 188  | 1.80 | 0.0646  | 0.0092  | 0.1980  | 0.0094  | 0.0223  | 0.0019  |         |         |     |     |     |    | 142.0 | 4.1  |     |    |     |
| T0004-4.1  | 603  | 790  | 0.76 | 0.0606  | 0.0027  | 0.1792  | 0.0035  | 0.0215  | 0.0023  |         |         |     |     |     |    | 136.8 | 3.6  |     |    |     |
| T0004-5.1  | 853  | 483  | 1.77 | 0.0886  | 0.0058  | 0.2700  | 0.0064  | 0.0221  | 0.0027  |         |         |     |     |     |    | 140.9 | 6.9  |     |    |     |
| T0004-6.1  | 231  | 235  | 0.98 | 0.0493  | 0.0058  | 0.1458  | 0.0061  | 0.0214  | 0.0019  |         |         |     |     |     |    | 136.8 | 3.2  |     |    |     |
| T0004-7.1  | 636  | 442  | 1.44 | 0.0613  | 0.0067  | 0.1750  | 0.0070  | 0.0207  | 0.0017  |         |         |     |     |     |    | 132.3 | 3.1  |     |    |     |
| T0004-8.1  | 900  | 413  | 2.18 | 0.1010  | 0.0025  | 0.3028  | 0.0031  | 0.0217  | 0.0017  |         |         |     |     |     |    | 138.6 | 3.8  |     |    |     |
| T0004-9.1  | 424  | 431  | 0.98 | 0.0551  | 0.0049  | 0.1574  | 0.0051  | 0.0207  | 0.0017  |         |         |     |     |     |    | 132.1 | 2.7  |     |    |     |
| T0004-10.1 | 222  | 220  | 1.01 | 0.0647  | 0.0056  | 0.1990  | 0.0060  | 0.0223  | 0.0019  |         |         |     |     |     |    | 142.1 | 3.3  |     |    |     |
| T0004-11.1 | 151  | 163  | 0.93 | 0.0570  | 0.0070  | 0.1700  | 0.0073  | 0.0217  | 0.0020  |         |         |     |     |     |    | 138.3 | 3.5  |     |    |     |
| T0004-12.1 | 416  | 500  | 0.83 | 0.0575  | 0.0130  | 0.1630  | 0.0130  | 0.0205  | 0.0016  |         |         |     |     |     |    | 130.8 | 3.1  |     |    |     |
| T0004-13.1 | 226  | 144  | 1.57 | 0.0740  | 0.0230  | 0.2270  | 0.0230  | 0.0224  | 0.0020  |         |         |     |     |     |    | 142.5 | 9.3  |     |    |     |
| T0004-14.1 | 272  | 379  | 0.72 | 0.0497  | 0.0060  | 0.1413  | 0.0062  | 0.0206  | 0.0017  |         |         |     |     |     |    | 131.5 | 2.8  |     |    |     |
| T0007-1.1  | 561  | 617  | 0.91 | 0.0579  | 0.0029  | 0.1635  | 0.0033  | 0.0205  | 0.0016  |         |         |     |     |     |    | 130.8 | 2.4  |     |    |     |
| T0007-2.1  | 147  | 203  | 0.72 | 0.0546  | 0.0057  | 0.1608  | 0.0060  | 0.0214  | 0.0019  |         |         |     |     |     |    | 136.2 | 2.9  |     |    |     |
| T0007-3.1  | 226  | 256  | 0.88 | 0.0614  | 0.0130  | 0.1810  | 0.0130  | 0.0214  | 0.0017  |         |         |     |     |     |    | 136.6 | 6.3  |     |    |     |
| T0007-4.1  | 154  | 218  | 0.71 | 0.0530  | 0.0058  | 0.1470  | 0.0061  | 0.0201  | 0.001   |         |         |     |     |     |    |       |      |     |    |     |



|                       |                 |                 |                 |                   |                   |                   |                   |                   |                   |  |                  |                |
|-----------------------|-----------------|-----------------|-----------------|-------------------|-------------------|-------------------|-------------------|-------------------|-------------------|--|------------------|----------------|
| T0007-16.1            | 316             | 434             | 0.73            | 0.0553            | 0.0034            | 0.1568            | 0.0038            | 0.0206            | 0.0017            |  | 131.3            | 2.5            |
| <del>T0011-2.1</del>  | <del>3444</del> | <del>4006</del> | <del>0.86</del> | <del>0.0752</del> | <del>0.0021</del> | <del>0.1548</del> | <del>0.0026</del> | <del>0.0149</del> | <del>0.0015</del> |  | <del>95.5</del>  | <del>2.1</del> |
| T0011-3.1             | 230             | 400             | 0.58            | 0.0580            | 0.0043            | 0.1604            | 0.0046            | 0.0201            | 0.0016            |  | 128.1            | 2.4            |
| <del>T0011-4.1</del>  | <del>2536</del> | <del>3947</del> | <del>0.64</del> | <del>0.0511</del> | <del>0.0018</del> | <del>0.1203</del> | <del>0.0023</del> | <del>0.0171</del> | <del>0.0014</del> |  | <del>109.1</del> | <del>1.9</del> |
| T0011-5.1             | 322             | 373             | 0.86            | 0.0589            | 0.0067            | 0.1720            | 0.0069            | 0.0211            | 0.0016            |  | 134.8            | 2.9            |
| T0011-6.1             | 243             | 441             | 0.55            | 0.0516            | 0.0037            | 0.1415            | 0.0041            | 0.0199            | 0.0016            |  | 126.9            | 2.3            |
| T0011-7.1             | 1799            | 3497            | 0.51            | 0.0525            | 0.0012            | 0.1376            | 0.0020            | 0.0190            | 0.0015            |  | 121.3            | 2.0            |
| T0011-8.1             | 195             | 434             | 0.45            | 0.0490            | 0.0048            | 0.1384            | 0.0050            | 0.0205            | 0.0016            |  | 130.6            | 2.4            |
| T0011-9.1             | 345             | 396             | 0.87            | 0.0570            | 0.0039            | 0.1571            | 0.0042            | 0.0200            | 0.0017            |  | 127.7            | 2.5            |
| <del>T0011-10.1</del> | <del>345</del>  | <del>396</del>  | <del>0.87</del> | <del>0.0562</del> | <del>0.0039</del> | <del>0.2970</del> | <del>0.0044</del> | <del>0.0384</del> | <del>0.0020</del> |  | <del>242.7</del> | <del>5.7</del> |
| T0011-11.1            | 296             | 366             | 0.81            | 0.0618            | 0.0041            | 0.1741            | 0.0045            | 0.0204            | 0.0017            |  | 130.3            | 2.6            |

M10, Jinhua (Li CL et al., 2014)

|                          |                |                |                 |  |  |                    |                    |                    |                    |  |                |                |
|--------------------------|----------------|----------------|-----------------|--|--|--------------------|--------------------|--------------------|--------------------|--|----------------|----------------|
| DY11-155-1-1             | 486            | 246            | 1.98            |  |  | 0.15475            | 0.00289            | 0.02197            | 0.00030            |  | 140            | 1.9            |
| <del>DY11-155-1-2</del>  | <del>217</del> | <del>124</del> | <del>1.75</del> |  |  | <del>0.18373</del> | <del>0.01226</del> | <del>0.02362</del> | <del>0.00068</del> |  | <del>150</del> | <del>4.3</del> |
| DY11-155-1-3             | 73             | 77             | 0.95            |  |  | 0.14876            | 0.00770            | 0.02063            | 0.00042            |  | 132            | 2.7            |
| DY11-155-1-4             | 70             | 71             | 0.99            |  |  | 0.14365            | 0.00668            | 0.02190            | 0.00034            |  | 140            | 2.1            |
| DY11-155-1-5             | 98             | 76             | 1.29            |  |  | 0.15220            | 0.00456            | 0.02224            | 0.00027            |  | 142            | 1.7            |
| DY11-155-1-6             | 334            | 248            | 1.35            |  |  | 0.15071            | 0.00570            | 0.02192            | 0.00051            |  | 140            | 3.2            |
| DY11-155-1-7             | 187            | 100            | 1.86            |  |  | 0.15296            | 0.00593            | 0.02191            | 0.00050            |  | 140            | 3.2            |
| DY11-155-1-8             | 86             | 83             | 1.04            |  |  | 0.14274            | 0.00701            | 0.02118            | 0.00073            |  | 135            | 4.6            |
| DY11-155-1-9             | 146            | 95             | 1.54            |  |  | 0.15653            | 0.01021            | 0.02221            | 0.00042            |  | 142            | 2.6            |
| DY11-155-1-10            | 268            | 148            | 1.81            |  |  | 0.15139            | 0.00285            | 0.02215            | 0.00021            |  | 141            | 1.3            |
| DY11-155-1-11            | 99             | 85             | 1.17            |  |  | 0.16081            | 0.00463            | 0.02172            | 0.00040            |  | 138            | 2.5            |
| DY11-155-1-12            | 316            | 172            | 1.84            |  |  | 0.15472            | 0.00297            | 0.02142            | 0.00038            |  | 137            | 2.4            |
| <del>DY11-155-1-13</del> | <del>54</del>  | <del>55</del>  | <del>0.99</del> |  |  | <del>0.21797</del> | <del>0.01671</del> | <del>0.02205</del> | <del>0.00121</del> |  | <del>141</del> | <del>7.6</del> |
| DY11-155-1-14            | 83             | 77             | 1.07            |  |  | 0.15882            | 0.00389            | 0.02200            | 0.00029            |  | 140            | 1.8            |
| DY11-155-1-15            | 249            | 336            | 0.74            |  |  | 0.15198            | 0.00186            | 0.02224            | 0.00023            |  | 142            | 1.5            |
| DY11-155-1-16            | 52             | 55             | 0.95            |  |  | 0.14814            | 0.01079            | 0.02184            | 0.00042            |  | 139            | 2.7            |
| DY11-155-1-17            | 55             | 47             | 1.17            |  |  | 0.15336            | 0.00598            | 0.02216            | 0.00036            |  | 141            | 2.3            |
| DY11-155-1-18            | 82             | 73             | 1.12            |  |  | 0.15823            | 0.00435            | 0.02194            | 0.00030            |  | 140            | 1.9            |
| DY11-155-1-19            | 178            | 117            | 1.52            |  |  | 0.16363            | 0.00262            | 0.02221            | 0.00020            |  | 142            | 1.2            |
| DY11-155-1-20            | 353            | 180            | 1.96            |  |  | 0.14959            | 0.00217            | 0.02181            | 0.00023            |  | 139            | 1.5            |

M11, Yongkang (10ZJ109 from Zhang et al., 2018; another from Li JH et al., 2014)

|               |      |     |      |         |         |         |         |         |         |      |      |       |     |
|---------------|------|-----|------|---------|---------|---------|---------|---------|---------|------|------|-------|-----|
| DY11-120-1-1  | 31   | 26  | 1.19 |         |         | 0.70463 | 0.02535 | 0.02631 | 0.00019 |      |      | 167   | 1.2 |
| DY11-120-1-2  | 42   | 33  | 1.27 |         |         | 0.14865 | 0.02162 | 0.02208 | 0.00036 |      |      | 140   | 2.3 |
| DY11-120-1-3  | 79   | 74  | 1.06 |         |         | 0.15257 | 0.00103 | 0.02123 | 0.00118 |      |      | 135   | 7.5 |
| DY11-120-1-4  | 129  | 93  | 1.38 |         |         | 0.15840 | 0.00461 | 0.02119 | 0.00015 |      |      | 135   | 0.9 |
| DY11-120-1-5  | 94   | 88  | 1.08 |         |         | 0.14698 | 0.01055 | 0.02146 | 0.00037 |      |      | 137   | 2.3 |
| DY11-120-1-6  | 59   | 50  | 1.16 |         |         | 0.15950 | 0.01944 | 0.02159 | 0.00015 |      |      | 138   | 0.9 |
| DY11-120-1-7  | 111  | 51  | 2.20 |         |         | 0.15696 | 0.01213 | 0.02203 | 0.00021 |      |      | 140   | 1.3 |
| DY11-120-1-8  | 85   | 63  | 1.35 |         |         | 0.15640 | 0.00642 | 0.02123 | 0.00018 |      |      | 136   | 1.1 |
| DY11-120-1-9  | 199  | 121 | 1.65 |         |         | 0.14493 | 0.01038 | 0.02119 | 0.00012 |      |      | 135   | 0.8 |
| DY11-120-1-10 | 98   | 49  | 2.01 |         |         | 0.83081 | 0.03321 | 0.02320 | 0.00040 |      |      | 148   | 2.5 |
| DY11-120-1-11 | 73   | 45  | 1.63 |         |         | 0.14059 | 0.02460 | 0.02093 | 0.00034 |      |      | 133   | 2.1 |
| DY11-120-1-12 | 22   | 27  | 0.82 |         |         | 0.14266 | 0.01750 | 0.02146 | 0.00031 |      |      | 137   | 2.0 |
| DY11-120-1-13 | 92   | 77  | 1.21 |         |         | 0.14569 | 0.00904 | 0.02098 | 0.00018 |      |      | 134   | 1.1 |
| DY11-120-1-14 | 46   | 39  | 1.18 |         |         | 0.57624 | 0.01669 | 0.02396 | 0.00015 |      |      | 153   | 0.9 |
| DY11-120-1-15 | 47   | 36  | 1.33 |         |         | 0.15541 | 0.01530 | 0.02163 | 0.00031 |      |      | 139   | 1.9 |
| DY11-120-1-16 | 120  | 45  | 2.69 |         |         | 1.94542 | 0.03537 | 0.03406 | 0.00058 |      |      | 216   | 3.6 |
| DY11-120-1-17 | 155  | 137 | 1.13 |         |         | 0.14997 | 0.00632 | 0.02160 | 0.00037 |      |      | 138   | 2.3 |
| DY11-120-1-18 | 149  | 60  | 2.48 |         |         | 0.17255 | 0.00143 | 0.01616 | 0.00009 |      |      | 103   | 0.6 |
|               |      |     |      |         |         |         |         |         |         |      |      |       |     |
| zj47-1.1      | 209  | 133 | 1.62 | 0.14790 | 0.00058 | 0.38500 | 0.00068 | 0.01885 | 0.00036 | 2322 | 100  | 120.4 | 4.3 |
| zj47-1.2      | 64   | 74  | 0.9  | 0.11700 | 0.00130 | 0.31700 | 0.00130 | 0.01967 | 0.00026 | 1912 | 230  | 115.7 | 4.7 |
| zj47-1.3      | 75   | 80  | 0.97 | 0.09300 | 0.00380 | 0.27000 | 0.00380 | 0.02120 | 0.00048 | 1485 | 720  | 123   | 4.7 |
| zj47-1.4      | 56   | 66  | 0.87 | 0.11900 | 0.00330 | 0.33000 | 0.00330 | 0.02045 | 0.00045 | 1934 | 590  | 114.8 | 3.8 |
| zj47-1.5      | 52   | 54  | 0.99 | 0.05400 | 0.00940 | 0.14000 | 0.00940 | 0.01920 | 0.00065 | 370  | 2100 | 127.6 | 4.5 |
| zj47-1.6      | 49   | 54  | 0.95 | 0.08100 | 0.00550 | 0.22000 | 0.00560 | 0.02010 | 0.00060 | 1210 | 1100 | 119   | 5.7 |
| zj47-1.7      | 98   | 105 | 0.96 | 0.04300 | 0.00610 | 0.11500 | 0.00610 | 0.01917 | 0.00035 | -140 | 1500 | 119.6 | 4.1 |
| zj47-1.8      | 128  | 87  | 1.51 | 0.22500 | 0.00110 | 0.55900 | 0.00120 | 0.01802 | 0.00043 | 3015 | 170  | 121.6 | 4.4 |
| zj47-1.9      | 77   | 87  | 0.91 | 0.04600 | 0.00640 | 0.11900 | 0.00640 | 0.01873 | 0.00041 | 10   | 1500 | 123   | 4.4 |
| zj47-1.10     | 48   | 59  | 0.84 | #####   | 0.28000 | 0.01760 | 0.00089 | #####   | 0.00035 | 400  | 2800 | 123   | 3.5 |
| zj47-1.11     | 63   | 65  | 1.01 | 0.05500 | 0.00260 | 0.14500 | 0.00260 | 0.01902 | 0.00030 | 424  | 590  | 110.5 | 4.8 |
|               |      |     |      |         |         |         |         |         |         |      |      |       |     |
| zj47-2.1      | 1071 | 348 | 3.18 | 0.02900 | 0.00500 | 0.06300 | 0.00500 | 0.01601 | 0.00022 | -130 | 160  | 102.4 | 2.3 |
| zj47-2.2      | 71   | 60  | 1.21 | 0.11200 | 0.00330 | 0.30000 | 0.00340 | 0.01930 | 0.00051 | 1828 | 610  | 123.2 | 6.4 |
| zj47-2.3      | 160  | 110 | 1.51 | 0.11000 | 0.00210 | 0.27500 | 0.00220 | 0.01806 | 0.00041 | 1806 | 390  | 115.4 | 4.8 |
| zj47-2.4      | 775  | 429 | 1.87 | 0.05680 | 0.00140 | 0.13400 | 0.00140 | 0.01711 | 0.00018 | 485  | 300  | 109.4 | 2.0 |
| zj47-2.5      | 338  | 180 | 1.94 | 0.04700 | 0.00340 | 0.10400 | 0.00340 | 0.01621 | 0.00030 | 34   | 810  | 103.6 | 3.1 |
| zj47-2.6      | 201  | 159 | 1.3  | 0.05100 | 0.00720 | 0.11200 | 0.00720 | 0.01593 | 0.00049 | 230  | 1700 | 101.9 | 5.0 |
| zj47-2.7      | 149  | 136 | 1.14 | 0.05000 | 0.00220 | 0.11100 | 0.00220 | 0.01590 | 0.00027 | 217  | 500  | 101.7 | 2.7 |
| zj47-2.8      | 127  | 72  | 1.82 | 0.14600 | 0.00180 | 0.37800 | 0.00180 | 0.01870 | 0.00038 | 2307 | 300  | 119.5 | 4.6 |
| zj47-2.9      | 441  | 247 | 1.84 | 0.06800 | 0.00280 | 0.15600 | 0.00280 | 0.01661 | 0.00029 | 869  | 580  | 106.2 | 3.1 |
| zj47-2.10     | 272  | 178 | 1.58 | 0.05600 | 0.00320 | 0.12800 | 0.00330 | 0.01665 | 0.00027 | 437  | 720  | 106.5 | 2.9 |
| zj47-2.11     | 366  | 224 | 1.69 | 0.06900 | 0.00260 | 0.16400 | 0.00260 | 0.01719 | 0.00027 | 906  | 530  | 109.8 | 3.0 |
| zj47-2.12     | 67   | 69  | 1.01 | 0.17600 | 0.00190 | 0.50000 | 0.00200 | 0.02060 | 0.00050 | 2619 | 320  | 131.5 | 6.6 |
|               |      |     |      |         |         |         |         |         |         |      |      |       |     |
| zj49-1.1      | 156  | 251 | 0.64 | 0.05300 | 0.00380 | 0.19300 | 0.00380 | 0.02621 | 0.00025 | 348  | 860  | 166.8 | 4.2 |
| zj49-1.2      | 369  | 448 | 0.85 | 0.05770 | 0.00090 | 0.16100 | 0.00091 | 0.02028 | 0.00013 | 517  | 200  | 129.4 | 1.7 |
| zj49-1.3      | 529  | 575 | 0.95 | 0.05110 | 0.00150 | 0.14300 | 0.00150 | 0.02032 | 0.00014 | 247  | 340  | 129.7 | 1.9 |



M12, Yanzhai (Ma et al., 2016)

|         |     |     |
|---------|-----|-----|
| ZJ90.1  | 125 | 4.2 |
| ZJ90.2  | 120 | 1.7 |
| ZJ90.3  | 122 | 1.9 |
| ZJ90.4  | 127 | 2.0 |
| ZJ90.5  | 119 | 1.2 |
| ZJ90.6  | 118 | 1.5 |
| ZJ90.7  | 119 | 1.2 |
| ZJ90.8  | 130 | 1.9 |
| ZJ90.9  | 122 | 1.8 |
| ZJ90.10 | 119 | 1.8 |
| ZJ90.11 | 128 | 1.9 |
| ZJ90.12 | 119 | 1.5 |
| ZJ90.13 | 121 | 1.6 |
| ZJ90.14 | 122 | 2.6 |
| ZJ90.15 | 127 | 2.6 |
| ZJ90.16 | 129 | 2.7 |
| ZJ90.17 | 120 | 1.1 |
| ZJ90.18 | 121 | 1.2 |
| ZJ90.19 | 121 | 1.7 |
| ZJ90.20 | 121 | 1.6 |
| ZJ90.21 | 119 | 1.2 |
| ZJ90.22 | 128 | 2.5 |
| ZJ90.23 | 121 | 1.2 |
| ZJ90.24 | 128 | 1.3 |
| ZJ90.25 | 121 | 1.5 |
| ZJ90.26 | 129 | 3.5 |
| ZJ90.27 | 128 | 2.7 |
| ZJ90.28 | 128 | 2.3 |
| ZJ90.29 | 129 | 1.7 |
| ZJ90.30 | 129 | 1.9 |
|         |     |     |
| ZJ93.1  | 110 | 1.1 |
| ZJ93.2  | 113 | 1.1 |
| ZJ93.3  | 110 | 1.1 |
| ZJ93.4  | 110 | 1.1 |
| ZJ93.5  | 110 | 1.1 |
| ZJ93.6  | 112 | 1.1 |
| ZJ93.7  | 114 | 1.1 |
| ZJ93.8  | 113 | 1.1 |
| ZJ93.9  | 113 | 1.1 |
| ZJ93.10 | 112 | 1.1 |
| ZJ93.11 | 113 | 1.1 |
| ZJ93.12 | 112 | 1.2 |
| ZJ93.13 | 114 | 1.2 |
| ZJ93.14 | 112 | 1.1 |
| ZJ93.15 | 110 | 1.1 |
| ZJ93.16 | 115 | 1.4 |
| ZJ93.17 | 111 | 1.1 |



|            |     |     |
|------------|-----|-----|
| WYS08.1    | 113 | 1.3 |
| WYS08.2    | 113 | 1.5 |
| WYS08.3    | 119 | 1.8 |
| WYS08.4    | 115 | 1.7 |
| WYS08.5    | 114 | 1.5 |
| WYS08.6    | 114 | 1.5 |
| WYS08.7    | 118 | 1.6 |
| WYS08.8    | 115 | 1.7 |
| WYS08.9    | 113 | 1.5 |
| WYS08.10   | 110 | 1.4 |
| WYS08.11   | 110 | 1.4 |
| WYS08.12   | 111 | 1.5 |
| WYS08.13   | 115 | 1.8 |
| WYS08.14   | 117 | 2.1 |
| WYS08.15   | 113 | 1.5 |
| WYS08.16   | 118 | 2.0 |
| WYS08.17   | 119 | 2.5 |
| WYS08.18   | 113 | 1.3 |
| WYS08-9.1  | 115 | 1.6 |
| WYS08-9.2  | 115 | 1.8 |
| WYS08-9.3  | 112 | 1.3 |
| WYS08-9.4  | 117 | 1.5 |
| WYS08-9.5  | 112 | 1.5 |
| WYS08-9.6  | 116 | 1.7 |
| WYS08-9.7  | 114 | 1.6 |
| WYS08-9.8  | 115 | 1.6 |
| WYS08-9.9  | 114 | 1.5 |
| WYS08-9.10 | 120 | 1.7 |
| WYS08-9.11 | 113 | 1.5 |
| WYS08-9.12 | 111 | 1.3 |

M13, Laozhu, Lishui (ZJ66 from Ma et al., 2016; 10ZJ064 from Zhang et al., 2018; and others from Wang et al., 2015)

|        |  |  |  |  |  |  |  |  |  |  |  |  |  |  |  |  |  |  |  |  |  |  |  |  |  |  |  |  |  |  |  |  |  |  |  |  |  |  |  |  |  |  |  |  |  |  |  |  |  |  |  |  |  |  |  |  |  |  |  |  |  |  |  |  |  |  |  |  |  |  |  |  |  |  |  |  |  |  |  |  |  |  |  |  |  |  |  |  |  |  |  |  |  |  |  |  |  |  |  |  |  |  |  |  |  |  |  |  |  |  |  |  |  |  |  |  |  |  |  |  |  |  |  |  |  |  |  |  |  |  |  |  |  |  |  |  |  |  |  |  |  |  |  |  |  |  |  |  |  |  |  |  |  |  |  |  |  |  |  |  |  |  |  |  |  |  |  |  |  |  |  |  |  |  |  |  |  |  |  |  |  |  |  |  |  |  |  |  |  |  |  |  |  |  |  |  |  |  |  |  |  |  |  |  |  |  |  |  |  |  |  |  |  |  |  |  |  |  |  |  |  |  |  |  |  |  |  |  |  |  |  |  |  |  |  |  |  |  |  |  |  |  |  |  |  |  |  |  |  |  |  |  |  |  |  |  |  |  |  |  |  |  |  |  |  |  |  |  |  |  |  |  |  |  |  |  |  |  |  |  |  |  |  |  |  |  |  |  |  |  |  |  |  |  |  |  |  |  |  |  |  |  |  |  |  |  |  |  |  |  |  |  |  |  |  |  |  |  |  |  |  |  |  |  |  |  |  |  |  |  |  |  |  |  |  |  |  |  |  |  |  |  |  |  |  |  |  |  |  |  |  |  |  |  |  |  |  |  |  |  |  |  |  |  |  |  |  |  |  |  |  |  |  |  |  |  |  |  |  |  |  |  |  |  |  |  |  |  |  |  |  |  |  |  |  |  |  |  |  |  |  |  |  |  |  |  |  |  |  |  |  |  |  |  |  |  |  |  |  |  |  |  |  |  |  |  |  |  |  |  |  |  |  |  |  |  |  |  |  |  |  |  |  |  |  |  |  |  |  |  |  |  |  |  |  |  |  |  |  |  |  |  |  |  |  |  |  |  |  |  |  |  |  |  |  |  |  |  |  |  |  |  |  |  |  |  |  |  |  |  |  |  |  |  |  |  |  |  |  |  |  |  |  |  |  |  |  |  |  |  |  |  |  |  |  |  |  |  |  |  |  |  |  |  |  |  |  |  |  |  |  |  |  |  |  |  |  |  |  |  |  |  |  |  |  |  |  |  |  |  |  |  |  |  |  |  |  |  |  |  |  |  |  |  |  |  |  |  |  |  |  |  |  |  |  |  |  |  |  |  |  |  |  |  |  |  |  |  |  |  |  |  |  |  |  |  |  |  |  |  |  |  |  |  |  |  |  |  |  |  |  |  |  |  |  |  |  |  |  |  |  |  |  |  |  |  |  |  |  |  |  |  |  |  |  |  |  |  |  |  |  |  |  |  |  |  |  |  |  |  |  |  |  |  |  |  |  |  |  |  |  |  |  |  |  |  |  |  |  |  |  |  |  |  |  |  |  |  |  |  |  |  |  |  |  |  |  |  |  |  |  |  |  |  |  |  |  |  |  |  |  |  |  |  |  |  |  |  |  |  |  |  |  |  |  |  |  |  |  |  |  |  |  |  |  |  |  |  |  |  |  |  |  |  |  |  |  |  |  |  |  |  |  |  |  |  |  |  |  |  |  |  |  |  |  |  |  |  |  |  |  |  |  |  |  |  |  |  |  |  |  |  |  |  |  |  |  |  |  |  |  |  |  |  |  |  |  |  |  |  |  |  |  |  |  |  |  |  |  |  |  |  |  |  |  |  |  |  |  |  |  |  |  |  |  |  |  |  |  |  |  |  |  |  |  |  |  |  |  |  |  |  |  |  |  |  |  |  |  |  |  |  |  |  |  |  |  |  |  |  |  |  |  |  |  |  |  |  |  |  |  |  |  |  |  |  |  |  |  |  |  |  |  |  |  |  |  |  |  |  |  |  |  |  |  |  |  |  |  |  |  |  |  |  |  |  |  |  |  |  |  |  |  |  |  |  |  |  |  |  |  |  |  |  |  |  |  |  |  |  |  |  |  |  |  |  |  |  |  |  |  |  |  |  |  |  |  |  |  |  |  |  |  |  |  |  |  |  |  |  |  |  |  |  |  |  |  |  |  |  |  |  |  |  |  |  |  |  |  |  |  |  |  |  |  |  |  |  |  |  |  |  |  |  |  |  |  |  |  |  |  |  |  |  |  |  |  |  |  |  |  |  |  |  |  |  |  |  |  |  |  |  |  |  |  |  |  |  |  |  |  |  |  |  |  |  |  |  |  |  |  |  |  |  |  |  |  |  |  |  |  |  |  |  |  |  |  |  |  |  |  |  |  |  |  |  |  |  |  |  |  |  |  |  |  |  |  |  |  |  |  |  |  |  |  |  |  |  |  |  |  |  |  |  |  |  |  |  |  |  |  |  |  |  |  |  |  |  |  |  |  |  |  |  |  |  |  |  |  |  |  |  |  |  |  |  |  |  |  |  |  |  |  |  |  |  |  |  |  |  |  |  |  |  |  |  |  |  |  |  |  |  |  |  |  |  |  |  |  |  |  |  |  |  |  |  |  |  |  |  |  |  |  |  |  |  |  |  |  |  |  |  |  |  |  |  |  |  |  |  |  |  |  |  |  |  |  |  |  |  |  |  |  |  |  |  |  |  |  |  |  |  |  |  |  |  |  |  |  |  |  |  |  |  |  |  |  |  |  |  |  |  |  |  |  |  |  |  |  |  |  |  |  |  |  |  |  |  |  |  |  |  |  |  |  |  |  |  |  |  |  |  |  |  |  |  |  |  |  |  |  |  |  |  |  |  |  |  |  |  |  |  |  |  |  |  |  |  |  |  |  |  |  |  |  |  |  |  |  |  |  |  |  |  |  |  |  |  |  |  |  |  |  |  |  |  |  |  |  |  |  |  |  |  |  |  |  |  |  |  |  |  |  |  |  |  |  |  |  |  |  |  |  |  |  |  |  |  |  |  |  |  |  |  |  |  |  |  |  |  |  |  |  |  |  |  |  |  |  |  |  |  |  |
|--------|--|--|--|--|--|--|--|--|--|--|--|--|--|--|--|--|--|--|--|--|--|--|--|--|--|--|--|--|--|--|--|--|--|--|--|--|--|--|--|--|--|--|--|--|--|--|--|--|--|--|--|--|--|--|--|--|--|--|--|--|--|--|--|--|--|--|--|--|--|--|--|--|--|--|--|--|--|--|--|--|--|--|--|--|--|--|--|--|--|--|--|--|--|--|--|--|--|--|--|--|--|--|--|--|--|--|--|--|--|--|--|--|--|--|--|--|--|--|--|--|--|--|--|--|--|--|--|--|--|--|--|--|--|--|--|--|--|--|--|--|--|--|--|--|--|--|--|--|--|--|--|--|--|--|--|--|--|--|--|--|--|--|--|--|--|--|--|--|--|--|--|--|--|--|--|--|--|--|--|--|--|--|--|--|--|--|--|--|--|--|--|--|--|--|--|--|--|--|--|--|--|--|--|--|--|--|--|--|--|--|--|--|--|--|--|--|--|--|--|--|--|--|--|--|--|--|--|--|--|--|--|--|--|--|--|--|--|--|--|--|--|--|--|--|--|--|--|--|--|--|--|--|--|--|--|--|--|--|--|--|--|--|--|--|--|--|--|--|--|--|--|--|--|--|--|--|--|--|--|--|--|--|--|--|--|--|--|--|--|--|--|--|--|--|--|--|--|--|--|--|--|--|--|--|--|--|--|--|--|--|--|--|--|--|--|--|--|--|--|--|--|--|--|--|--|--|--|--|--|--|--|--|--|--|--|--|--|--|--|--|--|--|--|--|--|--|--|--|--|--|--|--|--|--|--|--|--|--|--|--|--|--|--|--|--|--|--|--|--|--|--|--|--|--|--|--|--|--|--|--|--|--|--|--|--|--|--|--|--|--|--|--|--|--|--|--|--|--|--|--|--|--|--|--|--|--|--|--|--|--|--|--|--|--|--|--|--|--|--|--|--|--|--|--|--|--|--|--|--|--|--|--|--|--|--|--|--|--|--|--|--|--|--|--|--|--|--|--|--|--|--|--|--|--|--|--|--|--|--|--|--|--|--|--|--|--|--|--|--|--|--|--|--|--|--|--|--|--|--|--|--|--|--|--|--|--|--|--|--|--|--|--|--|--|--|--|--|--|--|--|--|--|--|--|--|--|--|--|--|--|--|--|--|--|--|--|--|--|--|--|--|--|--|--|--|--|--|--|--|--|--|--|--|--|--|--|--|--|--|--|--|--|--|--|--|--|--|--|--|--|--|--|--|--|--|--|--|--|--|--|--|--|--|--|--|--|--|--|--|--|--|--|--|--|--|--|--|--|--|--|--|--|--|--|--|--|--|--|--|--|--|--|--|--|--|--|--|--|--|--|--|--|--|--|--|--|--|--|--|--|--|--|--|--|--|--|--|--|--|--|--|--|--|--|--|--|--|--|--|--|--|--|--|--|--|--|--|--|--|--|--|--|--|--|--|--|--|--|--|--|--|--|--|--|--|--|--|--|--|--|--|--|--|--|--|--|--|--|--|--|--|--|--|--|--|--|--|--|--|--|--|--|--|--|--|--|--|--|--|--|--|--|--|--|--|--|--|--|--|--|--|--|--|--|--|--|--|--|--|--|--|--|--|--|--|--|--|--|--|--|--|--|--|--|--|--|--|--|--|--|--|--|--|--|--|--|--|--|--|--|--|--|--|--|--|--|--|--|--|--|--|--|--|--|--|--|--|--|--|--|--|--|--|--|--|--|--|--|--|--|--|--|--|--|--|--|--|--|--|--|--|--|--|--|--|--|--|--|--|--|--|--|--|--|--|--|--|--|--|--|--|--|--|--|--|--|--|--|--|--|--|--|--|--|--|--|--|--|--|--|--|--|--|--|--|--|--|--|--|--|--|--|--|--|--|--|--|--|--|--|--|--|--|--|--|--|--|--|--|--|--|--|--|--|--|--|--|--|--|--|--|--|--|--|--|--|--|--|--|--|--|--|--|--|--|--|--|--|--|--|--|--|--|--|--|--|--|--|--|--|--|--|--|--|--|--|--|--|--|--|--|--|--|--|--|--|--|--|--|--|--|--|--|--|--|--|--|--|--|--|--|--|--|--|--|--|--|--|--|--|--|--|--|--|--|--|--|--|--|--|--|--|--|--|--|--|--|--|--|--|--|--|--|--|--|--|--|--|--|--|--|--|--|--|--|--|--|--|--|--|--|--|--|--|--|--|--|--|--|--|--|--|--|--|--|--|--|--|--|--|--|--|--|--|--|--|--|--|--|--|--|--|--|--|--|--|--|--|--|--|--|--|--|--|--|--|--|--|--|--|--|--|--|--|--|--|--|--|--|--|--|--|--|--|--|--|--|--|--|--|--|--|--|--|--|--|--|--|--|--|--|--|--|--|--|--|--|--|--|--|--|--|--|--|--|--|--|--|--|--|--|--|--|--|--|--|--|--|--|--|--|--|--|--|--|--|--|--|--|--|--|--|--|--|--|--|--|--|--|--|--|--|--|--|--|--|--|--|--|--|--|--|--|--|--|--|--|--|--|--|--|--|--|--|--|--|--|--|--|--|--|--|--|--|--|--|--|--|--|--|--|--|--|--|--|--|--|--|--|--|--|--|--|--|--|--|--|--|--|--|--|--|--|--|--|--|--|--|--|--|--|--|--|--|--|--|--|--|--|--|--|--|--|--|--|--|--|--|--|--|--|--|--|--|--|--|--|--|--|--|--|--|--|--|--|--|--|--|--|--|--|--|--|--|--|--|--|--|--|--|--|--|--|--|--|--|--|--|--|--|--|--|--|--|--|--|--|--|--|--|--|--|--|--|--|--|--|--|--|--|--|--|--|--|--|--|--|--|--|--|--|--|--|--|--|--|--|--|--|--|--|--|--|--|--|--|--|--|--|--|--|--|--|--|--|--|--|--|--|--|--|--|--|--|--|--|--|--|--|--|--|--|--|--|--|--|--|--|--|--|--|--|--|--|--|--|--|--|--|--|--|--|--|--|--|--|--|--|--|--|--|--|--|--|--|--|--|--|--|--|--|--|--|--|--|--|--|--|--|--|--|--|--|--|--|--|--|--|--|--|--|--|--|
| ZJ66.1 |  |  |  |  |  |  |  |  |  |  |  |  |  |  |  |  |  |  |  |  |  |  |  |  |  |  |  |  |  |  |  |  |  |  |  |  |  |  |  |  |  |  |  |  |  |  |  |  |  |  |  |  |  |  |  |  |  |  |  |  |  |  |  |  |  |  |  |  |  |  |  |  |  |  |  |  |  |  |  |  |  |  |  |  |  |  |  |  |  |  |  |  |  |  |  |  |  |  |  |  |  |  |  |  |  |  |  |  |  |  |  |  |  |  |  |  |  |  |  |  |  |  |  |  |  |  |  |  |  |  |  |  |  |  |  |  |  |  |  |  |  |  |  |  |  |  |  |  |  |  |  |  |  |  |  |  |  |  |  |  |  |  |  |  |  |  |  |  |  |  |  |  |  |  |  |  |  |  |  |  |  |  |  |  |  |  |  |  |  |  |  |  |  |  |  |  |  |  |  |  |  |  |  |  |  |  |  |  |  |  |  |  |  |  |  |  |  |  |  |  |  |  |  |  |  |  |  |  |  |  |  |  |  |  |  |  |  |  |  |  |  |  |  |  |  |  |  |  |  |  |  |  |  |  |  |  |  |  |  |  |  |  |  |  |  |  |  |  |  |  |  |  |  |  |  |  |  |  |  |  |  |  |  |  |  |  |  |  |  |  |  |  |  |  |  |  |  |  |  |  |  |  |  |  |  |  |  |  |  |  |  |  |  |  |  |  |  |  |  |  |  |  |  |  |  |  |  |  |  |  |  |  |  |  |  |  |  |  |  |  |  |  |  |  |  |  |  |  |  |  |  |  |  |  |  |  |  |  |  |  |  |  |  |  |  |  |  |  |  |  |  |  |  |  |  |  |  |  |  |  |  |  |  |  |  |  |  |  |  |  |  |  |  |  |  |  |  |  |  |  |  |  |  |  |  |  |  |  |  |  |  |  |  |  |  |  |  |  |  |  |  |  |  |  |  |  |  |  |  |  |  |  |  |  |  |  |  |  |  |  |  |  |  |  |  |  |  |  |  |  |  |  |  |  |  |  |  |  |  |  |  |  |  |  |  |  |  |  |  |  |  |  |  |  |  |  |  |  |  |  |  |  |  |  |  |  |  |  |  |  |  |  |  |  |  |  |  |  |  |  |  |  |  |  |  |  |  |  |  |  |  |  |  |  |  |  |  |  |  |  |  |  |  |  |  |  |  |  |  |  |  |  |  |  |  |  |  |  |  |  |  |  |  |  |  |  |  |  |  |  |  |  |  |  |  |  |  |  |  |  |  |  |  |  |  |  |  |  |  |  |  |  |  |  |  |  |  |  |  |  |  |  |  |  |  |  |  |  |  |  |  |  |  |  |  |  |  |  |  |  |  |  |  |  |  |  |  |  |  |  |  |  |  |  |  |  |  |  |  |  |  |  |  |  |  |  |  |  |  |  |  |  |  |  |  |  |  |  |  |  |  |  |  |  |  |  |  |  |  |  |  |  |  |  |  |  |  |  |  |  |  |  |  |  |  |  |  |  |  |  |  |  |  |  |  |  |  |  |  |  |  |  |  |  |  |  |  |  |  |  |  |  |  |  |  |  |  |  |  |  |  |  |  |  |  |  |  |  |  |  |  |  |  |  |  |  |  |  |  |  |  |  |  |  |  |  |  |  |  |  |  |  |  |  |  |  |  |  |  |  |  |  |  |  |  |  |  |  |  |  |  |  |  |  |  |  |  |  |  |  |  |  |  |  |  |  |  |  |  |  |  |  |  |  |  |  |  |  |  |  |  |  |  |  |  |  |  |  |  |  |  |  |  |  |  |  |  |  |  |  |  |  |  |  |  |  |  |  |  |  |  |  |  |  |  |  |  |  |  |  |  |  |  |  |  |  |  |  |  |  |  |  |  |  |  |  |  |  |  |  |  |  |  |  |  |  |  |  |  |  |  |  |  |  |  |  |  |  |  |  |  |  |  |  |  |  |  |  |  |  |  |  |  |  |  |  |  |  |  |  |  |  |  |  |  |  |  |  |  |  |  |  |  |  |  |  |  |  |  |  |  |  |  |  |  |  |  |  |  |  |  |  |  |  |  |  |  |  |  |  |  |  |  |  |  |  |  |  |  |  |  |  |  |  |  |  |  |  |  |  |  |  |  |  |  |  |  |  |  |  |  |  |  |  |  |  |  |  |  |  |  |  |  |  |  |  |  |  |  |  |  |  |  |  |  |  |  |  |  |  |  |  |  |  |  |  |  |  |  |  |  |  |  |  |  |  |  |  |  |  |  |  |  |  |  |  |  |  |  |  |  |  |  |  |  |  |  |  |  |  |  |  |  |  |  |  |  |  |  |  |  |  |  |  |  |  |  |  |  |  |  |  |  |  |  |  |  |  |  |  |  |  |  |  |  |  |  |  |  |  |  |  |  |  |  |  |  |  |  |  |  |  |  |  |  |  |  |  |  |  |  |  |  |  |  |  |  |  |  |  |  |  |  |  |  |  |  |  |  |  |  |  |  |  |  |  |  |  |  |  |  |  |  |  |  |  |  |  |  |  |  |  |  |  |  |  |  |  |  |  |  |  |  |  |  |  |  |  |  |  |  |  |  |  |  |  |  |  |  |  |  |  |  |  |  |  |  |  |  |  |  |  |  |  |  |  |  |  |  |  |  |  |  |  |  |  |  |  |  |  |  |  |  |  |  |  |  |  |  |  |  |  |  |  |  |  |  |  |  |  |  |  |  |  |  |  |  |  |  |  |  |  |  |  |  |  |  |  |  |  |  |  |  |  |  |  |  |  |  |  |  |  |  |  |  |  |  |  |  |  |  |  |  |  |  |  |  |  |  |  |  |  |  |  |  |  |  |  |  |  |  |  |  |  |  |  |  |  |  |  |  |  |  |  |  |  |  |  |  |  |  |  |  |  |  |  |  |  |  |  |  |  |  |  |  |  |  |  |  |  |  |  |  |  |  |  |  |  |  |  |  |  |  |  |  |  |  |  |  |  |  |  |  |  |  |  |  |  |  |  |  |  |  |  |  |  |  |  |  |  |  |  |  |  |  |  |  |  |  |  |  |  |  |  |  |  |  |  |  |  |  |  |  |
|--------|--|--|--|--|--|--|--|--|--|--|--|--|--|--|--|--|--|--|--|--|--|--|--|--|--|--|--|--|--|--|--|--|--|--|--|--|--|--|--|--|--|--|--|--|--|--|--|--|--|--|--|--|--|--|--|--|--|--|--|--|--|--|--|--|--|--|--|--|--|--|--|--|--|--|--|--|--|--|--|--|--|--|--|--|--|--|--|--|--|--|--|--|--|--|--|--|--|--|--|--|--|--|--|--|--|--|--|--|--|--|--|--|--|--|--|--|--|--|--|--|--|--|--|--|--|--|--|--|--|--|--|--|--|--|--|--|--|--|--|--|--|--|--|--|--|--|--|--|--|--|--|--|--|--|--|--|--|--|--|--|--|--|--|--|--|--|--|--|--|--|--|--|--|--|--|--|--|--|--|--|--|--|--|--|--|--|--|--|--|--|--|--|--|--|--|--|--|--|--|--|--|--|--|--|--|--|--|--|--|--|--|--|--|--|--|--|--|--|--|--|--|--|--|--|--|--|--|--|--|--|--|--|--|--|--|--|--|--|--|--|--|--|--|--|--|--|--|--|--|--|--|--|--|--|--|--|--|--|--|--|--|--|--|--|--|--|--|--|--|--|--|--|--|--|--|--|--|--|--|--|--|--|--|--|--|--|--|--|--|--|--|--|--|--|--|--|--|--|--|--|--|--|--|--|--|--|--|--|--|--|--|--|--|--|--|--|--|--|--|--|--|--|--|--|--|--|--|--|--|--|--|--|--|--|--|--|--|--|--|--|--|--|--|--|--|--|--|--|--|--|--|--|--|--|--|--|--|--|--|--|--|--|--|--|--|--|--|--|--|--|--|--|--|--|--|--|--|--|--|--|--|--|--|--|--|--|--|--|--|--|--|--|--|--|--|--|--|--|--|--|--|--|--|--|--|--|--|--|--|--|--|--|--|--|--|--|--|--|--|--|--|--|--|--|--|--|--|--|--|--|--|--|--|--|--|--|--|--|--|--|--|--|--|--|--|--|--|--|--|--|--|--|--|--|--|--|--|--|--|--|--|--|--|--|--|--|--|--|--|--|--|--|--|--|--|--|--|--|--|--|--|--|--|--|--|--|--|--|--|--|--|--|--|--|--|--|--|--|--|--|--|--|--|--|--|--|--|--|--|--|--|--|--|--|--|--|--|--|--|--|--|--|--|--|--|--|--|--|--|--|--|--|--|--|--|--|--|--|--|--|--|--|--|--|--|--|--|--|--|--|--|--|--|--|--|--|--|--|--|--|--|--|--|--|--|--|--|--|--|--|--|--|--|--|--|--|--|--|--|--|--|--|--|--|--|--|--|--|--|--|--|--|--|--|--|--|--|--|--|--|--|--|--|--|--|--|--|--|--|--|--|--|--|--|--|--|--|--|--|--|--|--|--|--|--|--|--|--|--|--|--|--|--|--|--|--|--|--|--|--|--|--|--|--|--|--|--|--|--|--|--|--|--|--|--|--|--|--|--|--|--|--|--|--|--|--|--|--|--|--|--|--|--|--|--|--|--|--|--|--|--|--|--|--|--|--|--|--|--|--|--|--|--|--|--|--|--|--|--|--|--|--|--|--|--|--|--|--|--|--|--|--|--|--|--|--|--|--|--|--|--|--|--|--|--|--|--|--|--|--|--|--|--|--|--|--|--|--|--|--|--|--|--|--|--|--|--|--|--|--|--|--|--|--|--|--|--|--|--|--|--|--|--|--|--|--|--|--|--|--|--|--|--|--|--|--|--|--|--|--|--|--|--|--|--|--|--|--|--|--|--|--|--|--|--|--|--|--|--|--|--|--|--|--|--|--|--|--|--|--|--|--|--|--|--|--|--|--|--|--|--|--|--|--|--|--|--|--|--|--|--|--|--|--|--|--|--|--|--|--|--|--|--|--|--|--|--|--|--|--|--|--|--|--|--|--|--|--|--|--|--|--|--|--|--|--|--|--|--|--|--|--|--|--|--|--|--|--|--|--|--|--|--|--|--|--|--|--|--|--|--|--|--|--|--|--|--|--|--|--|--|--|--|--|--|--|--|--|--|--|--|--|--|--|--|--|--|--|--|--|--|--|--|--|--|--|--|--|--|--|--|--|--|--|--|--|--|--|--|--|--|--|--|--|--|--|--|--|--|--|--|--|--|--|--|--|--|--|--|--|--|--|--|--|--|--|--|--|--|--|--|--|--|--|--|--|--|--|--|--|--|--|--|--|--|--|--|--|--|--|--|--|--|--|--|--|--|--|--|--|--|--|--|--|--|--|--|--|--|--|--|--|--|--|--|--|--|--|--|--|--|--|--|--|--|--|--|--|--|--|--|--|--|--|--|--|--|--|--|--|--|--|--|--|--|--|--|--|--|--|--|--|--|--|--|--|--|--|--|--|--|--|--|--|--|--|--|--|--|--|--|--|--|--|--|--|--|--|--|--|--|--|--|--|--|--|--|--|--|--|--|--|--|--|--|--|--|--|--|--|--|--|--|--|--|--|--|--|--|--|--|--|--|--|--|--|--|--|--|--|--|--|--|--|--|--|--|--|--|--|--|--|--|--|--|--|--|--|--|--|--|--|--|--|--|--|--|--|--|--|--|--|--|--|--|--|--|--|--|--|--|--|--|--|--|--|--|--|--|--|--|--|--|--|--|--|--|--|--|--|--|--|--|--|--|--|--|--|--|--|--|--|--|--|--|--|--|--|--|--|--|--|--|--|--|--|--|--|--|--|--|--|--|--|--|--|--|--|--|--|--|--|--|--|--|--|--|--|--|--|--|--|--|--|--|--|--|--|--|--|--|--|--|--|--|--|--|--|--|--|--|--|--|--|--|--|--|--|--|--|--|--|--|--|--|--|--|--|--|--|--|--|--|--|--|--|--|--|--|--|--|--|--|--|--|--|--|--|--|--|--|--|--|--|--|--|--|--|--|--|--|--|--|--|--|--|--|--|--|--|--|--|--|--|--|--|--|--|--|--|--|--|--|--|--|--|--|--|--|--|--|--|--|--|--|--|--|--|--|--|--|--|--|--|--|--|--|--|--|--|--|--|--|--|--|--|--|--|--|--|--|--|--|



|            |     |     |      |         |        |         |        |         |        |  |  |  |  |  |  |  |  |  |  |       |      |
|------------|-----|-----|------|---------|--------|---------|--------|---------|--------|--|--|--|--|--|--|--|--|--|--|-------|------|
| T1-TW-1.6  | 301 | 264 | 1.14 | 0.06660 | 0.0060 | 0.17900 | 0.0060 | 0.01947 | 0.0019 |  |  |  |  |  |  |  |  |  |  | 124.3 | 3.1  |
| T1-TW-1.7  | 334 | 343 | 0.97 | 0.04780 | 0.0060 | 0.12940 | 0.0060 | 0.01961 | 0.0018 |  |  |  |  |  |  |  |  |  |  | 125.2 | 3.0  |
| T1-TW-1.8  | 267 | 340 | 0.79 | 0.04910 | 0.0090 | 0.13400 | 0.0090 | 0.01983 | 0.0021 |  |  |  |  |  |  |  |  |  |  | 126.6 | 3.3  |
| T1-TW-1.9  | 210 | 212 | 0.99 | 0.05080 | 0.0100 | 0.13900 | 0.0100 | 0.01990 | 0.0020 |  |  |  |  |  |  |  |  |  |  | 127.0 | 3.4  |
| T1-TW-1.10 | 117 | 124 | 0.94 | 0.06300 | 0.0210 | 0.18100 | 0.0210 | 0.02093 | 0.0024 |  |  |  |  |  |  |  |  |  |  | 133.5 | 5.0  |
| T1-TW-1.11 | 462 | 577 | 0.80 | 0.05340 | 0.0040 | 0.14120 | 0.0040 | 0.01916 | 0.0022 |  |  |  |  |  |  |  |  |  |  | 122.4 | 3.1  |
| T1-TW-1.12 | 384 | 360 | 1.07 | 0.04820 | 0.0060 | 0.12150 | 0.0060 | 0.01829 | 0.0018 |  |  |  |  |  |  |  |  |  |  | 116.8 | 2.7  |
| T1-TW-1.13 | 91  | 108 | 0.84 | 0.06000 | 0.0180 | 0.17400 | 0.0190 | 0.02091 | 0.0044 |  |  |  |  |  |  |  |  |  |  | 133.4 | 7.8  |
| T1-TW-1.14 | 160 | 186 | 0.86 | 0.05260 | 0.0170 | 0.14400 | 0.0170 | 0.01990 | 0.0021 |  |  |  |  |  |  |  |  |  |  | 127.0 | 3.5  |
| T1-TW-1.15 | 300 | 346 | 0.87 | 0.04360 | 0.0100 | 0.11400 | 0.0100 | 0.01900 | 0.0018 |  |  |  |  |  |  |  |  |  |  | 121.4 | 2.7  |
|            |     |     |      |         | 0.0000 |         | 0.0000 |         | 0.0000 |  |  |  |  |  |  |  |  |  |  |       |      |
| T2-TW-1.1  | 75  | 110 | 0.68 | 0.03320 | 0.0140 | 0.09400 | 0.0150 | 0.02048 | 0.0017 |  |  |  |  |  |  |  |  |  |  | 130.7 | 3.2  |
| T2-TW-2.1  | 64  | 74  | 0.86 | 0.04220 | 0.0180 | 0.11800 | 0.0180 | 0.02036 | 0.0021 |  |  |  |  |  |  |  |  |  |  | 129.9 | 4.3  |
| T2-TW-3.1  | 113 | 142 | 0.80 | 0.03780 | 0.0110 | 0.10500 | 0.0110 | 0.02007 | 0.0015 |  |  |  |  |  |  |  |  |  |  | 128.1 | 2.6  |
| T2-TW-4.1  | 67  | 84  | 0.80 | 0.04570 | 0.0150 | 0.12900 | 0.0150 | 0.02038 | 0.0019 |  |  |  |  |  |  |  |  |  |  | 130.1 | 3.4  |
| T2-TW-5.1  | 37  | 27  | 1.37 | 0.04200 | 0.0410 | 0.10900 | 0.0410 | 0.01871 | 0.0034 |  |  |  |  |  |  |  |  |  |  | 119.5 | 8.2  |
| T2-TW-6.1  | 115 | 160 | 0.72 | 0.05200 | 0.0080 | 0.14500 | 0.0090 | 0.02029 | 0.0014 |  |  |  |  |  |  |  |  |  |  | 129.5 | 2.3  |
| T2-TW-7.1  | 25  | 27  | 0.93 | 0.05500 | 0.0290 | 0.15000 | 0.0290 | 0.01976 | 0.0035 |  |  |  |  |  |  |  |  |  |  | 126.1 | 7.3  |
| T2-TW-8.1  | 48  | 45  | 1.07 | 0.02200 | 0.0690 | 0.06200 | 0.0690 | 0.02033 | 0.0027 |  |  |  |  |  |  |  |  |  |  | 129.8 | 5.8  |
| T2-TW-9.1  | 18  | 19  | 0.95 | 0.01600 | 0.1600 | 0.04100 | 0.1600 | 0.01871 | 0.0038 |  |  |  |  |  |  |  |  |  |  | 120.0 | 10.0 |
| T2-TW-10.1 | 122 | 195 | 0.63 | 0.05210 | 0.0090 | 0.14600 | 0.0090 | 0.02038 | 0.0013 |  |  |  |  |  |  |  |  |  |  | 130.0 | 2.5  |
| T2-TW-11.1 | 46  | 46  | 1.00 | 0.05100 | 0.0660 | 0.12500 | 0.0660 | 0.01783 | 0.0044 |  |  |  |  |  |  |  |  |  |  | 114.0 | 12.0 |
| T2-TW-12.1 | 97  | 147 | 0.66 | 0.05240 | 0.0120 | 0.14700 | 0.0120 | 0.02032 | 0.0016 |  |  |  |  |  |  |  |  |  |  | 129.6 | 2.5  |
| T2-TW-13.1 | 47  | 71  | 0.66 | 0.00300 | 0.8300 | 0.00900 | 0.8300 | 0.01973 | 0.0019 |  |  |  |  |  |  |  |  |  |  | 126.0 | 16.0 |
| T2-TW-14.1 | 142 | 250 | 0.57 | 0.04220 | 0.0070 | 0.11500 | 0.0070 | 0.01977 | 0.0012 |  |  |  |  |  |  |  |  |  |  | 126.2 | 1.9  |
|            |     |     |      |         |        |         |        |         |        |  |  |  |  |  |  |  |  |  |  |       |      |
| T3-TW-1.1  | 41  | 56  | 0.73 | 0.07100 | 0.0290 | 0.21400 | 0.0290 | 0.02194 | 0.0031 |  |  |  |  |  |  |  |  |  |  | 139.9 | 9.6  |
| T3-TW-2.1  | 84  | 143 | 0.59 | 0.04390 | 0.0180 | 0.12100 | 0.0180 | 0.02002 | 0.0032 |  |  |  |  |  |  |  |  |  |  | 127.8 | 4.9  |
| T3-TW-3.1  | 120 | 191 | 0.63 | 0.06220 | 0.0070 | 0.17600 | 0.0080 | 0.02056 | 0.0021 |  |  |  |  |  |  |  |  |  |  | 131.2 | 3.3  |
| T3-TW-4.1  | 103 | 165 | 0.62 | 0.03780 | 0.0140 | 0.10400 | 0.0140 | 0.01997 | 0.0029 |  |  |  |  |  |  |  |  |  |  | 127.5 | 4.5  |
| T3-TW-5.1  | 121 | 219 | 0.55 | 0.05290 | 0.0070 | 0.14400 | 0.0080 | 0.01981 | 0.0020 |  |  |  |  |  |  |  |  |  |  | 126.5 | 2.9  |
| T3-TW-6.1  | 85  | 137 | 0.62 | 0.06300 | 0.0140 | 0.17400 | 0.0140 | 0.01997 | 0.0031 |  |  |  |  |  |  |  |  |  |  | 127.4 | 5.0  |
| T3-TW-7.1  | 43  | 39  | 1.10 | 0.06100 | 0.0760 | 0.17000 | 0.0770 | 0.02030 | 0.0061 |  |  |  |  |  |  |  |  |  |  | 130.0 | 13.0 |
| T3-TW-8.1  | 68  | 90  | 0.76 | 0.05510 | 0.0120 | 0.16200 | 0.0130 | 0.02132 | 0.0028 |  |  |  |  |  |  |  |  |  |  | 136.0 | 4.8  |
| T3-TW-9.1  | 44  | 62  | 0.71 | 0.06600 | 0.0200 | 0.19400 | 0.0210 | 0.02128 | 0.0032 |  |  |  |  |  |  |  |  |  |  | 135.8 | 6.1  |
| T3-TW-10.1 | 297 | 185 | 1.61 | 0.07000 | 0.0140 | 0.18500 | 0.0140 | 0.01913 | 0.0022 |  |  |  |  |  |  |  |  |  |  | 122.2 | 4.0  |
| T3-TW-11.1 | 74  | 111 | 0.67 | 0.05820 | 0.0120 | 0.17100 | 0.0120 | 0.02128 | 0.0026 |  |  |  |  |  |  |  |  |  |  | 135.7 | 4.4  |
| T3-TW-12.1 | 99  | 153 | 0.65 | 0.04750 | 0.0130 | 0.12800 | 0.0130 | 0.01953 | 0.0023 |  |  |  |  |  |  |  |  |  |  | 124.7 | 3.8  |
| T3-TW-13.1 | 46  | 46  | 1.00 | 0.05200 | 0.0270 | 0.15400 | 0.0280 | 0.02140 | 0.0065 |  |  |  |  |  |  |  |  |  |  | 137.0 | 13.0 |

M14, Maonong, Songyang (Liu et al., 2012)

|         |     |      |      |         |         |         |         |         |         |         |         |     |     |     |   |     |     |     |    |     |
|---------|-----|------|------|---------|---------|---------|---------|---------|---------|---------|---------|-----|-----|-----|---|-----|-----|-----|----|-----|
| MN01-01 | 432 | 765  | 0.57 | 0.04897 | 0.00088 | 0.18694 | 0.00343 | 0.02769 | 0.00034 | 0.00819 | 0.00056 | 146 | 43  | 174 | 3 | 176 | 2.0 | 165 | 11 | 1.0 |
| MN01-02 | 595 | 1034 | 0.58 | 0.05000 | 0.00218 | 0.19079 | 0.00813 | 0.02768 | 0.00051 | 0.00566 | 0.00073 | 195 | 102 | 177 | 7 | 176 | 3.0 | 114 | 15 | 1.0 |
| MN01-03 | 421 | 733  | 0.57 | 0.04780 | 0.00138 | 0.18378 | 0.00526 | 0.02789 | 0.00039 | 0.00787 | 0.00082 | 89  | 67  | 171 | 5 | 177 | 2.0 | 158 | 16 | 1.0 |
| MN01-04 | 461 | 796  | 0.58 | 0.05066 | 0.00090 | 0.19357 | 0.00354 | 0.02772 | 0.00034 | 0.00825 | 0.00062 | 225 | 42  | 180 | 3 | 176 | 2.0 | 166 | 12 | 1.0 |
| MN01-05 | 818 | 1085 | 0.75 | 0.05170 | 0.00099 | 0.19844 | 0.00391 | 0.02785 | 0.00036 | 0.00714 | 0.00055 | 272 | 45  | 184 | 3 | 177 | 2.0 | 144 | 11 | 1.0 |
| MN01-06 | 749 | 1156 | 0.65 | 0.05012 | 0.00122 | 0.19488 | 0.00480 | 0.02822 | 0.00040 | 0.00588 | 0.00053 | 201 | 58  | 181 | 4 | 179 | 3.0 | 118 | 11 | 1.0 |
| MN01-07 | 570 | 809  | 0.70 | 0.05028 | 0.00114 | 0.19352 | 0.00436 | 0.02793 | 0.00035 | 0.01012 | 0.00142 | 208 | 54  | 180 | 4 | 178 | 2.0 | 204 | 28 | 1.0 |
| MN01-08 | 671 | 952  | 0.71 | 0.05031 | 0.00108 | 0.19524 | 0.00418 | 0.02815 | 0.00035 | 0.01086 | 0.00154 | 209 | 51  | 181 | 4 | 179 | 2.0 | 218 | 31 | 1.0 |
| MN01-09 | 289 | 684  | 0.42 | 0.04973 | 0.00123 | 0.19318 | 0.00475 | 0.02818 | 0.00037 | 0.01052 | 0.00163 | 182 | 59  | 179 | 4 | 179 | 2.0 | 212 | 33 | 1.0 |
| MN01-10 | 571 | 910  | 0.63 | 0.04974 | 0.00106 | 0.19620 | 0.00420 | 0.02861 | 0.00036 | 0.00969 | 0.00127 | 183 | 51  | 182 | 4 | 182 | 2.0 | 195 | 25 | 1.0 |
| MN01-11 | 513 | 950  | 0.54 | 0.05003 | 0.00143 | 0.19234 | 0.00550 | 0.02788 | 0.00042 | 0.00602 | 0.00047 | 196 | 68  | 179 | 5 | 177 | 3.0 | 121 | 9  | 1.0 |
| MN01-12 | 457 | 660  | 0.69 | 0.04905 | 0.00192 | 0.19009 | 0.00720 | 0.02811 | 0.00044 | 0.01016 | 0.00187 | 150 | 91  | 177 | 6 | 179 | 3.0 | 204 | 37 | 1.0 |
| MN01-13 | 156 | 319  | 0.49 | 0.04972 | 0.00135 | 0.19185 | 0.00516 | 0.02799 | 0.00037 | 0.00877 | 0.00073 | 182 | 65  | 178 | 4 | 178 | 2.0 | 176 | 15 | 1.0 |
| MN01-14 | 570 | 1093 | 0.52 | 0.05004 | 0.00193 | 0.19363 | 0.00733 | 0.02807 | 0.00049 | 0.00458 | 0.00052 | 197 | 91  | 180 | 6 | 178 | 3.0 | 92  | 10 | 1.0 |
| MN01-15 | 222 | 515  | 0.43 | 0.04924 | 0.00192 | 0.18969 | 0.00727 | 0.02794 | 0.00046 | 0.00543 | 0.00055 | 159 | 92  | 176 | 6 | 178 | 3.0 | 109 | 11 | 1.0 |
| MN01-16 | 556 | 1107 | 0.50 | 0.04920 | 0.00110 | 0.18747 | 0.00424 | 0.02764 | 0.00038 | 0.00618 | 0.00051 | 157 | 54  | 174 | 4 | 176 | 2.0 | 125 | 10 | 1.0 |
| MN01-17 | 828 | 1095 | 0.76 | 0.05042 | 0.00086 | 0.19220 | 0.00333 | 0.02765 | 0.00033 | 0.00775 | 0.00068 | 214 | 40  | 179 | 3 | 176 | 2.0 | 156 | 14 | 1.0 |
| MN01-18 | 821 | 1217 | 0.67 | 0.04999 | 0.00104 | 0.19013 | 0.00402 | 0.02759 | 0.00037 | 0.00685 | 0.00063 | 195 | 49  | 177 | 3 | 175 | 2.0 | 138 | 13 | 1.0 |
| MN01-19 | 308 | 511  | 0.60 | 0.04958 | 0.00305 | 0.18972 | 0.01109 | 0.02779 | 0.00059 | 0.00728 | 0.00209 | 175 | 141 | 176 | 9 | 177 | 4.0 | 147 | 42 | 1.0 |
| MN01-20 | 562 | 1009 | 0.56 | 0.04824 | 0.00200 | 0.18677 | 0.00757 | 0.02807 | 0.00050 | 0.00652 | 0.00112 | 111 | 94  | 174 | 6 | 178 | 3.0 | 131 | 22 | 1.0 |
| MN01-21 | 529 | 729  | 0.73 | 0.05227 | 0.00218 | 0.19836 | 0.00787 | 0.02754 | 0.00046 | 0.00749 | 0.00154 | 297 | 98  | 184 | 7 | 175 | 3.0 | 151 | 31 | 1.0 |

M15, Ehuling Formation in southern Jiangshan, Zhejiang (Zhang et al., 2009)

|      |       |      |      |         |         |  |  |         |         |  |  |  |  |  |  |  |  |  |  |       |     |
|------|-------|------|------|---------|---------|--|--|---------|---------|--|--|--|--|--|--|--|--|--|--|-------|-----|
| 1.1  | 680   | 653  | 1.08 | 0.05250 | 0.00430 |  |  | 0.04360 | 0.00220 |  |  |  |  |  |  |  |  |  |  | 144.7 | 3.3 |
| 2.1  | 307   | 506  | 0.63 | 0.22500 | 0.00500 |  |  | 0.02888 | 0.00230 |  |  |  |  |  |  |  |  |  |  | 186.2 | 5.6 |
| 3.1  | 383   | 404  | 0.98 | 0.07500 | 0.02200 |  |  | 0.04340 | 0.00240 |  |  |  |  |  |  |  |  |  |  | 144.8 | 3.5 |
| 4.1  | 301   | 336  | 0.93 | 0.07380 | 0.00820 |  |  | 0.04420 | 0.00240 |  |  |  |  |  |  |  |  |  |  | 137.7 | 4.1 |
| 5.1  | 257   | 424  | 0.63 | 0.06680 | 0.01100 |  |  | 0.04630 | 0.00230 |  |  |  |  |  |  |  |  |  |  | 133.5 | 3.5 |
| 5.1  | 381   | 513  | 0.77 | 0.07790 | 0.00790 |  |  | 0.04500 | 0.00230 |  |  |  |  |  |  |  |  |  |  | 137.6 | 3.3 |
| 7.1  | 355   | 356  | 1.03 | 0.04240 | 0.00420 |  |  | 0.04510 | 0.00240 |  |  |  |  |  |  |  |  |  |  | 139.7 | 3.4 |
| 8.1  | 341   | 297  | 1.18 | 0.08850 | 0.01000 |  |  | 0.04340 | 0.00370 |  |  |  |  |  |  |  |  |  |  | 139.1 | 5.4 |
| 9.1  | 732   | 679  | 1.11 | 0.06140 | 0.00940 |  |  | 0.04490 | 0.00220 |  |  |  |  |  |  |  |  |  |  | 140.9 | 3.3 |
| 10.1 | 11489 | 6778 | 1.75 | 0.06450 | 0.00210 |  |  | 0.04005 | 0.00210 |  |  |  |  |  |  |  |  |  |  | 156.3 | 3.3 |
| 11.1 | 454   | 452  | 1.04 | 0.05320 | 0.00860 |  |  | 0.04610 | 0.00230 |  |  |  |  |  |  |  |  |  |  | 136.3 | 3.2 |
| 12.1 | 527   | 514  | 1.06 | 0.05170 | 0.01100 |  |  | 0.04600 | 0.00230 |  |  |  |  |  |  |  |  |  |  | 136.8 | 3.1 |
| 13.1 | 323   | 465  | 0.72 | 0.06360 | 0.00610 |  |  | 0.04370 | 0.00230 |  |  |  |  |  |  |  |  |  |  | 143.6 | 3.6 |
| 14.1 | 443   | 502  | 0.91 | 0.05790 | 0.00380 |  |  | 0.04500 | 0.00280 |  |  |  |  |  |  |  |  |  |  | 139.2 | 4.0 |
| 15.1 | 429   | 537  | 0.83 | 0.04520 | 0.00590 |  |  | 0.04690 | 0.00230 |  |  |  |  |  |  |  |  |  |  | 134.8 | 3.0 |
| 16.1 | 455   | 553  | 0.85 | 0.05950 | 0.01000 |  |  | 0.04660 | 0.00230 |  |  |  |  |  |  |  |  |  |  | 136.1 | 3.1 |
| 17.1 | 553   | 478  | 1.19 | 0.06490 | 0.00980 |  |  | 0.04610 | 0.00230 |  |  |  |  |  |  |  |  |  |  | 134.4 | 3.2 |



L5, Shixi of Yanshan county in Xinjiang Basin

|    |            |       |      |      |         |         |         |         |         |         |         |         |      |      |     |     |    |     |     |     |     |     |
|----|------------|-------|------|------|---------|---------|---------|---------|---------|---------|---------|---------|------|------|-----|-----|----|-----|-----|-----|-----|-----|
| E1 | 1107-01-1  | 566   | 123  | 4.61 | 0.04856 | 0.00616 | 0.14691 | 0.01852 | 0.02195 | 0.00049 | 0.00502 | 0.00066 | 0.05 | 127  | 261 | 139 | 16 | 140 | 3.0 | 101 | 13  | 1.0 |
|    | 1107-01-2  | 676   | 150  | 4.51 | 0.04772 | 0.00650 | 0.14595 | 0.01970 | 0.02219 | 0.00057 | 0.00450 | 0.00071 | 0.05 | 85   | 272 | 138 | 17 | 141 | 4.0 | 91  | 14  | 1.0 |
|    | 1107-01-3  | 1156  | 190  | 6.07 | 0.04890 | 0.00354 | 0.15329 | 0.01107 | 0.02274 | 0.00042 | 0.00413 | 0.00043 | 0.12 | 143  | 164 | 145 | 10 | 145 | 3.0 | 83  | 9   | 1.0 |
|    | 1107-01-4  | 630   | 130  | 4.86 | 0.04734 | 0.00551 | 0.13988 | 0.01622 | 0.02143 | 0.00045 | 0.00432 | 0.00050 | 0.07 | 66   | 238 | 133 | 14 | 137 | 3.0 | 87  | 10  | 1.0 |
|    | 1107-01-5  | 510   | 106  | 4.83 | 0.04811 | 0.00668 | 0.14099 | 0.01948 | 0.02126 | 0.00047 | 0.00527 | 0.00081 | 0.05 | 105  | 278 | 134 | 17 | 136 | 3.0 | 106 | 16  | 1.0 |
|    | 1107-01-6  | 1367  | 223  | 6.13 | 0.04693 | 0.00457 | 0.14441 | 0.01393 | 0.02232 | 0.00051 | 0.00436 | 0.00066 | 0.08 | 46   | 214 | 137 | 12 | 142 | 3.0 | 88  | 13  | 1.0 |
|    | 1107-01-7  | 503   | 108  | 4.64 | 0.04814 | 0.00679 | 0.14084 | 0.01977 | 0.02122 | 0.00047 | 0.00578 | 0.00096 | 0.05 | 106  | 283 | 134 | 18 | 135 | 3.0 | 116 | 19  | 1.0 |
|    | 1107-01-8  | 260   | 63   | 4.14 | 0.04959 | 0.01190 | 0.16140 | 0.03851 | 0.02360 | 0.00072 | 0.00753 | 0.00216 | 0.02 | 176  | 423 | 152 | 34 | 150 | 5.0 | 152 | 43  | 1.0 |
|    | 1107-01-9  | 865   | 159  | 5.45 | 0.04888 | 0.00620 | 0.14565 | 0.01830 | 0.02161 | 0.00056 | 0.00301 | 0.00042 | 0.06 | 142  | 263 | 138 | 16 | 138 | 4.0 | 61  | 8   | 1.0 |
|    | 1107-01-10 | 408   | 106  | 3.83 | 0.04630 | 0.00891 | 0.14015 | 0.02675 | 0.02196 | 0.00069 | 0.00292 | 0.00043 | 0.03 | 13   | 330 | 133 | 24 | 140 | 4.0 | 59  | 9   | 1.1 |
|    | 1107-01-11 | 1322  | 485  | 2.73 | 0.04944 | 0.00201 | 0.14913 | 0.00615 | 0.02188 | 0.00037 | 0.00439 | 0.00068 | 0.24 | 169  | 95  | 141 | 5  | 140 | 2.0 | 89  | 14  | 1.0 |
|    | 1107-01-12 | 604   | 128  | 4.70 | 0.04825 | 0.00609 | 0.14177 | 0.01782 | 0.02131 | 0.00046 | 0.00651 | 0.00158 | 0.06 | 112  | 256 | 135 | 16 | 136 | 3.0 | 131 | 32  | 1.0 |
|    | 1107-01-13 | 851   | 153  | 5.56 | 0.04198 | 0.00523 | 0.12545 | 0.01557 | 0.02167 | 0.00047 | 0.00389 | 0.00061 | 0.07 | -178 | 205 | 120 | 14 | 138 | 3.0 | 78  | 12  | 1.2 |
|    | 1107-01-14 | 1402  | 347  | 4.03 | 0.05062 | 0.00270 | 0.15087 | 0.00806 | 0.02162 | 0.00039 | 0.00388 | 0.00063 | 0.17 | 224  | 124 | 143 | 7  | 138 | 2.0 | 78  | 13  | 1.0 |
|    | 1107-01-15 | 862   | 176  | 4.91 | 0.04892 | 0.00585 | 0.14020 | 0.01661 | 0.02079 | 0.00051 | 0.00541 | 0.00142 | 0.06 | 144  | 253 | 133 | 15 | 133 | 3.0 | 109 | 29  | 1.0 |
| E2 | 1107-02-1  | 3265  | 1808 | 1.81 | 0.04478 | 0.00124 | 0.14307 | 0.00397 | 0.02318 | 0.00035 | 0.00209 | 0.00013 | 0.28 | -31  | 55  | 136 | 4  | 148 | 2.0 | 42  | 3   | 1.1 |
|    | 1107-02-2  | 2394  | 715  | 3.35 | 0.07558 | 0.00307 | 0.23434 | 0.00936 | 0.02251 | 0.00039 | 0.00532 | 0.00142 | 0.18 | 1084 | 83  | 214 | 8  | 143 | 2.0 | 107 | 29  | 0.7 |
|    | 1107-02-3  | 2014  | 647  | 3.11 | 0.04852 | 0.00221 | 0.14126 | 0.00639 | 0.02113 | 0.00034 | 0.00540 | 0.00142 | 0.16 | 125  | 104 | 134 | 6  | 135 | 2.0 | 109 | 29  | 1.0 |
|    | 1107-02-4  | 558   | 279  | 2.00 | 0.04907 | 0.00433 | 0.14682 | 0.01283 | 0.02174 | 0.00045 | 0.00551 | 0.00195 | 0.08 | 151  | 200 | 139 | 11 | 139 | 3.0 | 111 | 39  | 1.0 |
|    | 1107-02-5  | 5401  | 2063 | 2.62 | 0.04837 | 0.00107 | 0.14509 | 0.00333 | 0.02175 | 0.00031 | 0.00419 | 0.00059 | 0.37 | 117  | 53  | 138 | 3  | 139 | 2.0 | 85  | 12  | 1.0 |
|    | 1107-02-6  | 14647 | 4276 | 3.43 | 0.04688 | 0.00133 | 0.14275 | 0.00403 | 0.02210 | 0.00036 | 0.00115 | 0.00007 | 0.28 | 43   | 62  | 135 | 4  | 141 | 2.0 | 23  | 1   | 1.0 |
|    | 1107-02-7  | 6395  | 2840 | 2.25 | 0.04944 | 0.00110 | 0.14686 | 0.00337 | 0.02154 | 0.00030 | 0.00341 | 0.00044 | 0.35 | 169  | 53  | 139 | 3  | 137 | 2.0 | 69  | 9   | 1.0 |
|    | 1107-02-8  | 4708  | 1668 | 2.82 | 0.04791 | 0.00140 | 0.13923 | 0.00408 | 0.02109 | 0.00031 | 0.00642 | 0.00204 | 0.26 | 95   | 68  | 132 | 4  | 135 | 2.0 | 129 | 41  | 1.0 |
|    | 1107-02-9  | 1041  | 441  | 2.36 | 0.05646 | 0.00253 | 0.16339 | 0.00727 | 0.02099 | 0.00034 | 0.00468 | 0.00079 | 0.16 | 471  | 102 | 154 | 6  | 134 | 2.0 | 94  | 16  | 0.9 |
|    | 1107-02-10 | 1655  | 839  | 1.97 | 0.04870 | 0.00214 | 0.14471 | 0.00627 | 0.02158 | 0.00036 | 0.00739 | 0.00380 | 0.16 | 133  | 100 | 137 | 6  | 138 | 2.0 | 149 | 76  | 1.0 |
|    | 1107-02-11 | 2897  | 1203 | 2.41 | 0.04905 | 0.00189 | 0.14119 | 0.00537 | 0.02091 | 0.00033 | 0.00792 | 0.00462 | 0.18 | 150  | 90  | 134 | 5  | 133 | 2.0 | 159 | 93  | 1.0 |
|    | 1107-02-12 | 3113  | 970  | 3.21 | 0.04969 | 0.00223 | 0.15108 | 0.00669 | 0.02209 | 0.00038 | 0.00841 | 0.00601 | 0.16 | 181  | 105 | 143 | 6  | 141 | 2.0 | 169 | 120 | 1.0 |
|    | 1107-02-13 | 2309  | 1091 | 2.12 | 0.04766 | 0.00227 | 0.14383 | 0.00675 | 0.02194 | 0.00040 | 0.01217 | 0.01352 | 0.16 | 82   | 106 | 136 | 6  | 140 | 3.0 | 244 | 270 | 1.0 |
|    | 1107-02-14 | 2721  | 1542 | 1.76 | 0.04814 | 0.00190 | 0.13961 | 0.00543 | 0.02107 | 0.00035 | 0.00912 | 0.00710 | 0.18 | 106  | 90  | 133 | 5  | 134 | 2.0 | 184 | 142 | 1.0 |
|    | 1107-02-15 | 8430  | 2880 | 2.93 | 0.04870 | 0.00144 | 0.14073 | 0.00410 | 0.02096 | 0.00031 | 0.00586 | 0.00210 | 0.22 | 133  | 71  | 134 | 4  | 134 | 2.0 | 118 | 42  | 1.0 |
| E3 | 1107-03-1  | 4403  | 2055 | 2.14 | 0.04722 | 0.00146 | 0.14267 | 0.00441 | 0.02194 | 0.00032 | 0.00972 | 0.00659 | 0.24 | 60   | 68  | 135 | 4  | 140 | 2.0 | 196 | 132 | 1.0 |
|    | 1107-03-2  | 5878  | 2222 | 2.65 | 0.04896 | 0.00121 | 0.14644 | 0.00370 | 0.02169 | 0.00030 | 0.00701 | 0.00251 | 0.31 | 146  | 59  | 139 | 3  | 138 | 2.0 | 141 | 50  | 1.0 |
|    | 1107-03-3  | 2021  | 905  | 2.23 | 0.04774 | 0.00257 | 0.14018 | 0.00745 | 0.02136 | 0.00040 | 0.00986 | 0.01086 | 0.14 | 86   | 120 | 133 | 7  | 136 | 3.0 | 198 | 217 | 1.0 |
|    | 1107-03-4  | 2093  | 527  | 3.97 | 0.04866 | 0.00367 | 0.13873 | 0.01026 | 0.02073 | 0.00045 | 0.00692 | 0.00494 | 0.08 | 131  | 170 | 132 | 9  | 132 | 3.0 | 139 | 99  | 1.0 |
|    | 1107-03-5  | 2966  | 1448 | 2.05 | 0.04786 | 0.00155 | 0.14056 | 0.00451 | 0.02130 | 0.00031 | 0.00600 | 0.00132 | 0.21 | 92   | 74  | 134 | 4  | 136 | 2.0 | 121 | 27  | 1.0 |
|    | 1107-03-6  | 2991  | 1089 | 2.75 | 0.04800 | 0.00144 | 0.13962 | 0.00422 | 0.02109 | 0.00031 | 0.00375 | 0.00058 | 0.26 | 99   | 70  | 133 | 4  | 135 | 2.0 | 76  | 12  | 1.0 |
|    | 1107-03-7  | 1188  | 477  | 2.49 | 0.04958 | 0.00241 | 0.14840 | 0.00715 | 0.02171 | 0.00035 | 0.00630 | 0.00198 | 0.14 | 175  | 113 | 140 | 6  | 138 | 2.0 | 127 | 40  | 1.0 |
|    | 1107-03-8  | 653   | 115  | 5.69 | 0.04865 | 0.00742 | 0.15244 | 0.02304 | 0.02272 | 0.00057 | 0.00626 | 0.00189 | 0.03 | 131  | 295 | 144 | 20 | 145 | 4.0 | 126 | 38  | 1.0 |
|    | 1107-03-9  | 1117  | 443  | 2.52 | 0.04863 | 0.00259 | 0.13993 | 0.00739 | 0.02087 | 0.00034 | 0.00601 | 0.00185 | 0.13 | 130  | 121 | 133 | 7  | 133 | 2.0 | 121 | 37  | 1.0 |
|    | 1107-03-10 | 3927  | 1754 | 2.24 | 0.04825 | 0.00128 | 0.14228 | 0.00383 | 0.02139 | 0.00031 | 0.00391 | 0.00070 | 0.30 | 112  | 63  | 135 | 3  | 136 | 2.0 | 79  | 14  | 1.0 |
|    | 1107-03-11 | 1946  | 791  | 2.46 | 0.04999 | 0.00227 | 0.15348 | 0.00704 | 0.02229 | 0.00037 | 0.00914 | 0.00929 | 0.21 | 195  | 106 | 145 | 6  | 142 | 2.0 | 184 | 186 | 1.0 |
|    | 1107-03-12 | 4646  | 1879 | 2.47 | 0.04851 | 0.00128 | 0.14874 | 0.00398 | 0.02224 | 0.00032 | 0.00276 | 0.00046 | 0.29 | 124  | 63  | 141 | 4  | 142 | 2.0 | 56  | 9   | 1.0 |
|    | 1107-03-13 | 5354  | 1875 | 2.86 | 0.04676 | 0.00126 | 0.14235 | 0.00387 | 0.02208 | 0.00032 | 0.00251 | 0.00034 | 0.28 | 37   | 58  | 135 | 3  | 141 | 2.0 | 51  | 7   | 1.0 |
|    | 1107-03-14 | 2936  | 1457 | 2.01 | 0.04751 | 0.00142 | 0.13768 | 0.00414 | 0.02102 | 0.00031 | 0.00439 | 0.00111 | 0.26 | 75   | 67  | 131 | 4  | 134 | 2.0 | 89  | 22  | 1.0 |
|    | 1107-03-15 | 5696  | 1914 | 2.98 | 0.04737 | 0.00143 | 0.14532 | 0.00439 | 0.02225 | 0.00033 | 0.00522 | 0.00151 | 0.25 | 68   | 68  | 138 | 4  | 142 | 2.0 | 105 | 30  | 1.0 |
| E4 | 1107-04-1  | 1916  | 420  | 4.56 | 0.04942 | 0.00246 | 0.14214 | 0.00700 |         |         |         |         |      |      |     |     |    |     |     |     |     |     |



|    |               |      |     |      |         |         |         |         |         |         |         |         |      |      |     |     |    |     |     |     |     |     |
|----|---------------|------|-----|------|---------|---------|---------|---------|---------|---------|---------|---------|------|------|-----|-----|----|-----|-----|-----|-----|-----|
|    | 1108-04-2     | 2471 | 475 | 5.20 | 0.04789 | 0.00229 | 0.14301 | 0.00684 | 0.02167 | 0.00035 | 0.00175 | 0.00015 | 0.17 | 94   | 107 | 136 | 6  | 138 | 2.0 | 35  | 3   | 1.0 |
|    | 1108-04-3     | 1452 | 388 | 3.74 | 0.04798 | 0.00264 | 0.14207 | 0.00782 | 0.02148 | 0.00035 | 0.00444 | 0.00088 | 0.15 | 98   | 123 | 135 | 7  | 137 | 2.0 | 90  | 18  | 1.0 |
|    | 1108-04-4     | 801  | 269 | 2.97 | 0.04951 | 0.00405 | 0.14334 | 0.01165 | 0.02100 | 0.00038 | 0.00545 | 0.00143 | 0.08 | 172  | 186 | 136 | 10 | 134 | 2.0 | 110 | 29  | 1.0 |
|    | 1108-04-5     | 619  | 244 | 2.54 | 0.04682 | 0.00407 | 0.13633 | 0.01177 | 0.02112 | 0.00040 | 0.00218 | 0.00029 | 0.08 | 40   | 192 | 130 | 11 | 135 | 3.0 | 44  | 6   | 1.0 |
|    | 1108-04-6     | 1812 | 415 | 4.37 | 0.04776 | 0.00253 | 0.14117 | 0.00747 | 0.02144 | 0.00035 | 0.00276 | 0.00039 | 0.15 | 87   | 118 | 134 | 7  | 137 | 2.0 | 56  | 8   | 1.0 |
|    | 1108-04-7     | 1460 | 374 | 3.90 | 0.04551 | 0.00273 | 0.13633 | 0.00814 | 0.02174 | 0.00038 | 0.00157 | 0.00015 | 0.13 | -28  | 131 | 130 | 7  | 139 | 2.0 | 32  | 3   | 1.1 |
|    | 1108-04-8     | 321  | 137 | 2.34 | 0.04883 | 0.00713 | 0.14566 | 0.02115 | 0.02164 | 0.00050 | 0.00602 | 0.00225 | 0.04 | 140  | 293 | 138 | 19 | 138 | 3.0 | 121 | 45  | 1.0 |
|    | 1108-04-9     | 1228 | 296 | 4.15 | 0.04767 | 0.00368 | 0.14212 | 0.01093 | 0.02162 | 0.00040 | 0.00562 | 0.00218 | 0.10 | 83   | 173 | 135 | 10 | 138 | 3.0 | 113 | 44  | 1.0 |
|    | 1108-04-10    | 1270 | 314 | 4.05 | 0.04667 | 0.00295 | 0.13815 | 0.00870 | 0.02147 | 0.00037 | 0.00183 | 0.00020 | 0.12 | 32   | 139 | 131 | 8  | 137 | 2.0 | 37  | 4   | 1.0 |
|    | 1108-04-11    | 3466 | 851 | 4.07 | 0.04883 | 0.00196 | 0.14300 | 0.00580 | 0.02123 | 0.00034 | 0.00516 | 0.00176 | 0.22 | 140  | 93  | 136 | 5  | 135 | 2.0 | 104 | 35  | 1.0 |
|    | 1108-04-12    | 3215 | 745 | 4.31 | 0.04754 | 0.00175 | 0.14389 | 0.00534 | 0.02195 | 0.00035 | 0.00232 | 0.00031 | 0.23 | 76   | 82  | 137 | 5  | 140 | 2.0 | 47  | 6   | 1.0 |
|    | 1108-04-13    | 1718 | 504 | 3.41 | 0.04835 | 0.00239 | 0.14286 | 0.00707 | 0.02142 | 0.00036 | 0.00297 | 0.00056 | 0.17 | 116  | 112 | 136 | 6  | 137 | 2.0 | 60  | 11  | 1.0 |
|    | 1108-04-14    | 385  | 171 | 2.25 | 0.04814 | 0.00553 | 0.14326 | 0.01637 | 0.02157 | 0.00044 | 0.00469 | 0.00139 | 0.06 | 106  | 242 | 136 | 15 | 138 | 3.0 | 95  | 28  | 1.0 |
|    | 1108-04-15    | 888  | 351 | 2.53 | 0.04782 | 0.00273 | 0.14160 | 0.00806 | 0.02147 | 0.00036 | 0.00206 | 0.00028 | 0.14 | 90   | 127 | 134 | 7  | 137 | 2.0 | 42  | 6   | 1.0 |
| F2 | 1109-05-1     | 371  | 95  | 3.91 | 0.04501 | 0.00852 | 0.12908 | 0.02426 | 0.02080 | 0.00060 | 0.01114 | 0.00459 | 0.03 | -19  | 306 | 123 | 22 | 133 | 4.0 | 224 | 92  | 1.1 |
|    | 1109-05-2     | 1195 | 272 | 4.40 | 0.04687 | 0.00284 | 0.13132 | 0.00793 | 0.02032 | 0.00035 | 0.00405 | 0.00052 | 0.13 | 43   | 133 | 125 | 7  | 130 | 2.0 | 82  | 10  | 1.0 |
|    | 1109-05-3     | 943  | 219 | 4.30 | 0.09009 | 0.00597 | 0.27614 | 0.01745 | 0.02223 | 0.00059 | 0.00116 | 0.00007 | 0.09 | 1427 | 130 | 248 | 14 | 142 | 4.0 | 23  | 4   | 0.6 |
|    | 1109-05-4     | 1070 | 231 | 4.63 | 0.04636 | 0.00293 | 0.13023 | 0.00820 | 0.02037 | 0.00036 | 0.00196 | 0.00013 | 0.13 | 16   | 139 | 124 | 7  | 130 | 2.0 | 40  | 3   | 1.0 |
|    | 1109-05-5     | 987  | 243 | 4.07 | 0.05165 | 0.00309 | 0.14493 | 0.00861 | 0.02035 | 0.00036 | 0.00399 | 0.00056 | 0.13 | 270  | 139 | 137 | 8  | 130 | 2.0 | 80  | 11  | 0.9 |
|    | 1109-05-6     | 1230 | 293 | 4.19 | 0.04437 | 0.00383 | 0.12503 | 0.01062 | 0.02044 | 0.00049 | 0.00091 | 0.00006 | 0.08 | -51  | 174 | 120 | 10 | 130 | 3.0 | 18  | 1   | 1.1 |
|    | 1109-05-7     | 305  | 87  | 3.49 | 0.04719 | 0.00687 | 0.13481 | 0.01951 | 0.02072 | 0.00049 | 0.00205 | 0.00019 | 0.05 | 59   | 273 | 128 | 17 | 132 | 3.0 | 41  | 4   | 1.0 |
|    | 1109-05-8     | 245  | 66  | 3.72 | 0.05343 | 0.01046 | 0.14290 | 0.02776 | 0.01940 | 0.00058 | 0.00796 | 0.00308 | 0.03 | 347  | 387 | 136 | 25 | 124 | 4.0 | 160 | 62  | 0.9 |
|    | 1109-05-9     | 420  | 121 | 3.47 | 0.04473 | 0.00714 | 0.12973 | 0.02046 | 0.02104 | 0.00062 | 0.00135 | 0.00011 | 0.03 | -33  | 267 | 124 | 18 | 134 | 4.0 | 27  | 2   | 1.1 |
|    | 1109-05-10    | 442  | 140 | 3.15 | 0.09553 | 0.00839 | 0.28001 | 0.02350 | 0.02126 | 0.00067 | 0.00152 | 0.00014 | 0.06 | 1539 | 171 | 251 | 19 | 136 | 4.0 | 31  | 3   | 0.5 |
|    | 1109-05-11    | 1329 | 386 | 3.45 | 0.04558 | 0.00208 | 0.13330 | 0.00608 | 0.02121 | 0.00036 | 0.00194 | 0.00015 | 0.18 | -24  | 97  | 127 | 5  | 135 | 2.0 | 39  | 3   | 1.1 |
|    | 1109-05-12    | 727  | 169 | 4.30 | 0.06015 | 0.00392 | 0.18152 | 0.01173 | 0.02189 | 0.00042 | 0.00277 | 0.00030 | 0.12 | 609  | 145 | 169 | 10 | 140 | 3.0 | 56  | 6   | 0.8 |
|    | 1109-05-13    | 1131 | 276 | 4.10 | 0.04378 | 0.00265 | 0.12576 | 0.00756 | 0.02083 | 0.00038 | 0.00187 | 0.00016 | 0.13 | -82  | 133 | 120 | 7  | 133 | 2.0 | 38  | 3   | 1.1 |
|    | 1109-05-14    | 530  | 133 | 3.98 | 0.04709 | 0.00473 | 0.13722 | 0.01370 | 0.02114 | 0.00044 | 0.00270 | 0.00031 | 0.08 | 54   | 218 | 131 | 12 | 135 | 3.0 | 54  | 6   | 1.0 |
|    | 1109-05-15    | 1576 | 346 | 4.55 | 0.08705 | 0.00287 | 0.26621 | 0.00874 | 0.02218 | 0.00038 | 0.00247 | 0.00022 | 0.25 | 1362 | 65  | 240 | 7  | 141 | 2.0 | 50  | 4   | 0.6 |
| F3 | 13104-01zk-01 | 2435 | 653 | 3.73 | 0.05077 | 0.00196 | 0.15194 | 0.00582 | 0.02171 | 0.00034 | 0.00863 | 0.00266 | 0.19 | 230  | 59  | 144 | 5  | 138 | 2.0 | 174 | 53  | 1.0 |
|    | 13104-01zk-02 | 685  | 302 | 2.27 | 0.05862 | 0.00227 | 0.65331 | 0.02480 | 0.08084 | 0.00139 | 0.03016 | 0.01262 | 0.18 | 553  | 53  | 511 | 15 | 501 | 8.0 | 601 | 248 | 1.0 |
|    | 13104-01zk-03 | 2178 | 602 | 3.62 | 0.04870 | 0.00240 | 0.14400 | 0.00701 | 0.02145 | 0.00036 | 0.00810 | 0.00251 | 0.14 | 133  | 81  | 137 | 6  | 137 | 2.0 | 163 | 50  | 1.0 |
|    | 13104-01zk-04 | 1317 | 514 | 2.56 | 0.04375 | 0.00238 | 0.13220 | 0.00713 | 0.02192 | 0.00036 | 0.00871 | 0.00287 | 0.12 | -84  | 86  | 126 | 6  | 140 | 2.0 | 175 | 58  | 1.1 |
|    | 13104-01zk-05 | 1138 | 341 | 3.34 | 0.04884 | 0.00315 | 0.14635 | 0.00936 | 0.02173 | 0.00038 | 0.00592 | 0.00113 | 0.11 | 140  | 111 | 139 | 8  | 139 | 2.0 | 119 | 23  | 1.0 |
|    | 13104-01zk-06 | 981  | 397 | 2.47 | 0.05102 | 0.00291 | 0.15317 | 0.00864 | 0.02178 | 0.00037 | 0.00746 | 0.00221 | 0.11 | 242  | 99  | 145 | 8  | 139 | 2.0 | 150 | 44  | 1.0 |
|    | 13104-01zk-07 | 2042 | 663 | 3.08 | 0.04907 | 0.00191 | 0.14757 | 0.00570 | 0.02182 | 0.00036 | 0.00640 | 0.00148 | 0.20 | 151  | 60  | 140 | 5  | 139 | 2.0 | 129 | 30  | 1.0 |
|    | 13104-01zk-08 | 1056 | 359 | 2.94 | 0.04891 | 0.00357 | 0.14884 | 0.01073 | 0.02208 | 0.00041 | 0.00681 | 0.00228 | 0.08 | 144  | 127 | 141 | 9  | 141 | 3.0 | 137 | 46  | 1.0 |
|    | 13104-01zk-09 | 2427 | 736 | 3.30 | 0.04994 | 0.00215 | 0.14523 | 0.00616 | 0.02110 | 0.00035 | 0.00748 | 0.00280 | 0.16 | 192  | 68  | 138 | 5  | 135 | 2.0 | 151 | 56  | 1.0 |
|    | 13104-01zk-10 | 2763 | 698 | 3.96 | 0.04974 | 0.00210 | 0.14184 | 0.00590 | 0.02069 | 0.00034 | 0.00651 | 0.00213 | 0.16 | 183  | 66  | 135 | 5  | 132 | 2.0 | 131 | 43  | 1.0 |
|    | 13104-01zk-11 | 3526 | 837 | 4.21 | 0.04875 | 0.00247 | 0.15501 | 0.00772 | 0.02306 | 0.00045 | 0.00431 | 0.00094 | 0.15 | 136  | 78  | 146 | 7  | 147 | 3.0 | 87  | 19  | 1.0 |
|    | 13104-01zk-12 | 2283 | 742 | 3.08 | 0.04849 | 0.00184 | 0.14749 | 0.00554 | 0.02206 | 0.00036 | 0.00574 | 0.00143 | 0.19 | 123  | 58  | 140 | 5  | 141 | 2.0 | 116 | 29  | 1.0 |
|    | 13104-01zk-13 | 3194 | 754 | 4.24 | 0.04895 | 0.00223 | 0.15041 | 0.00674 | 0.02228 | 0.00039 | 0.00628 | 0.00221 | 0.15 | 145  | 72  | 142 | 6  | 142 | 2.0 | 127 | 44  | 1.0 |
|    | 13104-01zk-14 | 1815 | 497 | 3.66 | 0.04874 | 0.00239 | 0.14844 | 0.00720 | 0.02209 | 0.00037 | 0.00704 | 0.00241 | 0.14 | 135  | 80  | 141 | 6  | 141 | 2.0 | 142 | 48  | 1.0 |
|    | 13104-01zk-15 | 1769 | 361 | 4.91 | 0.04889 | 0.00351 | 0.15203 | 0.01081 | 0.02255 | 0.00044 | 0.00623 | 0.00204 | 0.10 | 143  | 124 | 144 | 10 | 144 | 3.0 | 126 | 41  | 1.0 |

L60, Aoxi town, Le'an

|              |       |       |      |         |         |         |         |         |         |         |         |      |     |     |     |    |     |     |     |    |     |
|--------------|-------|-------|------|---------|---------|---------|---------|---------|---------|---------|---------|------|-----|-----|-----|----|-----|-----|-----|----|-----|
| 150127-01-01 | 155.4 | 167.1 | 0.93 | 0.04845 | 0.00111 | 0.14234 | 0.00319 | 0.02131 | 0.00030 | 0.00545 | 0.00016 | 0.28 | 121 | 55  | 135 | 3  | 136 | 2.0 | 110 | 3  | 1.0 |
| 150127-01-02 | 193.6 | 180.7 | 1.07 | 0.04878 | 0.00100 | 0.15062 | 0.00304 | 0.02240 | 0.00032 | 0.00585 | 0.00015 | 0.33 | 137 | 49  | 142 | 3  | 143 | 2.0 | 118 | 3  | 1.0 |
| 150127-01-03 | 210.4 | 270.1 | 0.78 | 0.04816 | 0.00092 | 0.14144 | 0.00266 | 0.02130 | 0.00029 | 0.00548 | 0.00016 | 0.34 | 107 | 46  | 134 | 2  | 136 | 2.0 | 110 | 3  | 1.0 |
| 150127-01-04 | 162.3 | 189.3 | 0.86 | 0.04854 | 0.00100 | 0.14351 | 0.00290 | 0.02145 | 0.00030 | 0.00575 | 0.00016 | 0.32 | 126 | 50  | 136 | 3  | 137 | 2.0 | 116 | 3  | 1.0 |
| 150127-01-05 | 197.5 | 251.5 | 0.79 | 0.04903 | 0.00093 | 0.14212 | 0.00265 | 0.02102 | 0.00029 | 0.00557 | 0.00017 | 0.35 | 149 | 45  | 135 | 2  | 134 | 2.0 | 112 | 3  | 1.0 |
| 150127-01-06 | 158.8 | 225.2 | 0.71 | 0.04871 | 0.00102 | 0.14506 | 0.00298 | 0.02160 | 0.00031 | 0.00560 | 0.00019 | 0.32 | 134 | 50  | 138 | 3  | 138 | 2.0 | 113 | 4  | 1.0 |
| 150127-01-07 | 170.1 | 244.4 | 0.70 | 0.04938 | 0.00086 | 0.14854 | 0.00256 | 0.02182 | 0.00030 | 0.00565 | 0.00017 | 0.39 | 166 | 42  | 141 | 2  | 139 | 2.0 | 114 | 3  | 1.0 |
| 150127-01-08 | 250.6 | 455.2 | 0.55 | 0.04752 | 0.00346 | 0.14621 | 0.01017 | 0.02228 | 0.00061 | 0.00403 | 0.00053 | 0.08 | 75  | 162 | 139 | 9  | 142 | 4.0 | 81  | 11 | 1.0 |
| 150127-01-09 | 270.9 | 412.3 | 0.66 | 0.04894 | 0.00179 | 0.14712 | 0.00516 | 0.02180 | 0.00038 | 0.00617 | 0.00046 | 0.16 | 145 | 86  | 139 | 5  | 139 | 2.0 | 124 | 9  | 1.0 |
| 150127-01-10 | 130.9 | 141.8 | 0.92 | 0.04875 | 0.00143 | 0.14697 | 0.00418 | 0.02187 | 0.00032 | 0.00671 | 0.00032 | 0.20 | 136 | 70  | 139 | 4  | 139 | 2.0 | 135 | 6  | 1.0 |
| 150127-01-11 | 311.3 | 311.0 | 1.00 | 0.04928 | 0.00079 | 0.14505 | 0.00230 | 0.02135 | 0.00029 | 0.00580 | 0.00015 | 0.42 | 161 | 38  | 138 | 2  | 136 | 2.0 | 117 | 3  | 1.0 |
| 150127-01-12 | 321.9 | 296.8 | 1.08 | 0.04840 | 0.00087 | 0.13954 | 0.00249 | 0.02091 | 0.00029 | 0.00568 | 0.00015 | 0.38 | 119 | 43  | 133 | 2  | 133 | 2.0 | 114 | 3  | 1.0 |
| 150127-01-13 | 220.2 | 232.2 | 0.95 | 0.04909 | 0.00108 | 0.15212 | 0.00329 | 0.02248 | 0.00033 | 0.00608 | 0.00019 | 0.31 | 152 | 53  | 144 | 3  | 143 | 2.0 | 123 | 4  | 1.0 |
| 150127-01-14 | 186.6 | 192.4 | 0.97 | 0.04895 | 0.00329 | 0.14517 | 0.00936 | 0.02151 | 0.00053 | 0.00482 | 0.00040 | 0.08 | 145 | 152 | 138 | 8  | 137 | 3.0 | 97  | 8  | 1.0 |
| 150127-01-15 | 127.1 | 193.8 | 0.66 | 0.04971 | 0.00117 | 0.15007 | 0.00347 | 0.02190 | 0.00032 | 0.00599 | 0.00022 | 0.29 | 181 | 56  | 142 | 3  | 140 | 2.0 | 121 | 4  | 1.0 |
| 150127-01-16 | 112.7 | 138.7 | 0.81 | 0.04848 | 0.00140 | 0.14240 | 0.00402 | 0.02130 | 0.00033 | 0.00572 | 0.00022 | 0.23 | 123 | 69  | 135 | 4  | 136 | 2.0 | 115 | 4  | 1.0 |
| 150127-01-17 | 341.6 | 279.8 | 1.22 | 0.04960 | 0.00232 | 0.14627 | 0.00657 | 0.02139 | 0.00042 | 0.00617 | 0.00046 | 0.12 | 176 | 109 | 139 | 6  | 136 | 3.0 | 124 | 9  | 1.0 |
| 150127-01-18 | 274.7 | 244.2 | 1.13 | 0.04878 | 0.00135 | 0.13717 | 0.00370 | 0.02039 | 0.00031 | 0.00585 | 0.00027 | 0.24 | 137 | 66  | 131 | 3  | 130 | 2.0 | 118 | 5  | 1.0 |
| 150127-01-19 | 147.8 | 146.2 | 1.01 | 0.04827 | 0.00176 | 0.14736 | 0.00521 | 0.02214 | 0.00037 | 0.00695 | 0.00037 | 0.17 | 113 | 84  | 140 | 5  | 141 | 2.0 | 140 | 7  | 1.0 |
| 150127-01-20 | 137.9 | 160.5 | 0.86 | 0.04859 | 0.00110 | 0.15178 | 0.00339 | 0.02266 | 0.00033 | 0.00650 | 0.00025 | 0.31 | 128 | 55  | 143 | 3  | 144 | 2.0 | 131 | 5  | 1.0 |
|              |       |       |      |         |         |         |         |         |         |         |         |      |     |     |     |    |     |     |     |    |     |
| 150127-02-01 | 328.9 | 388.9 | 0.85 | 0.04993 | 0.00093 | 0.13853 | 0.00255 | 0.02012 | 0.00028 | 0.00628 | 0.00020 | 0.36 | 192 | 44  | 132 | 2  | 128 | 2.0 | 127 | 4  | 1.0 |
| 150127-02-02 | 164.6 | 193.9 | 0.85 | 0.04978 | 0.00246 | 0.13754 | 0.00655 | 0.02004 | 0.00041 | 0.00638 | 0.00039 | 0.13 | 185 | 114 | 131 | 6  | 128 | 3.0 | 129 | 8  | 1.0 |
| 150127-02-03 | 901.8 | 423.3 | 2.13 | 0.04892 | 0.00134 | 0.13842 | 0.00368 | 0.02052 | 0.00033 | 0.00574 | 0.00023 | 0.25 | 144 | 66  | 132 | 3  | 131 | 2.0 | 116 | 5  | 1.0 |
| 150127-02-04 | 300.7 | 417.5 | 0.72 | 0.04894 | 0.00078 | 0.13708 | 0.00217 | 0.02032 | 0.00028 | 0.00565 | 0.00016 | 0.43 | 145 | 38  | 130 | 2  | 130 | 2.0 | 114 | 3  | 1.0 |
| 150127-02-05 | 356.6 | 415.3 | 0.86 | 0.04915 | 0.00126 | 0.21824 | 0.00545 | 0.03221 | 0.00052 | 0.00497 | 0.00024 | 0.28 | 155 | 61  | 200 | 5  | 204 | 3.0 | 100 | 5  | 1.0 |
| 150127-02-06 | 403.4 | 107.4 | 0.96 | 0.04881 | 0.00357 | 0.15642 | 0.01099 | 0.02325 | 0.00058 | 0.00586 | 0.00051 | 0.06 | 139 | 165 | 148 | 10 | 148 | 4.0 | 118 | 10 | 1.0 |
| 150127-02-07 | 164.5 | 116.8 | 1.41 | 0.04857 | 0.00128 | 0.14045 | 0.00362 | 0.02097 | 0.00030 | 0.00585 | 0.00019 | 0.24 | 127 | 63  | 133 | 3  | 134 | 2.0 | 118 | 4  | 1.0 |
| 150127-02-08 | 464.1 | 456.3 | 1.02 | 0.04987 | 0.00119 | 0.23273 | 0.00540 | 0.03385 | 0.00052 | 0.00564 | 0.00029 | 0.29 | 189 | 57  | 212 | 4  | 215 | 3.0 | 114 | 6  | 1.0 |
| 150127-02-09 | 229.9 | 204.0 | 1.13 | 0.04956 | 0.00143 | 0.14326 | 0.00400 | 0.02097 | 0.00031 | 0.00594 | 0.00028 | 0.20 | 174 | 69  | 136 | 4  | 134 | 2.0 | 120 | 6  | 1.0 |
| 150127-02-10 | 204.9 | 226.4 | 0.90 | 0.04932 | 0.00137 | 0.14716 | 0.00397 | 0.02164 | 0.00034 | 0.00510 | 0.00023 | 0.24 | 163 | 66  | 139 | 4  | 138 | 2.0 | 103 | 5  | 1.0 |
| 150127-02-11 | 183.4 | 227.8 | 0.80 | 0.04890 | 0.00095 | 0.13530 | 0.00258 | 0.02007 | 0.00028 | 0.00533 | 0.00014 | 0.34 | 143 | 47  | 129 | 2  | 128 | 2.0 | 107 | 3  | 1.0 |
| 150127-02-12 | 434.7 | 511.9 | 0.85 | 0.04808 | 0.00114 | 0.20715 | 0.00480 | 0.03125 | 0.00050 | 0.00457 | 0.00020 | 0.31 | 103 | 57  | 191 | 4  | 198 | 3.0 | 92  | 4  | 1.0 |
| 150127-02-13 | 257.8 | 369.0 | 0.70 | 0.04915 | 0.00075 | 0.13604 | 0.00207 | 0.02008 | 0.00027 | 0.00515 | 0.00013 | 0.44 | 155 | 37  | 130 | 2  | 128 | 2.0 | 104 | 3  | 1.0 |



|              |       |       |      |         |         |         |         |         |         |         |         |      |     |    |     |    |     |      |     |    |     |
|--------------|-------|-------|------|---------|---------|---------|---------|---------|---------|---------|---------|------|-----|----|-----|----|-----|------|-----|----|-----|
| 150127-02-14 | 221.6 | 270.4 | 0.82 | 0.04859 | 0.00100 | 0.13207 | 0.00265 | 0.01972 | 0.00027 | 0.00503 | 0.00015 | 0.30 | 128 | 50 | 126 | 2  | 126 | 2.0  | 101 | 3  | 1.0 |
| 150127-02-15 | 69.9  | 81.2  | 0.86 | 0.06649 | 0.00167 | 1.25051 | 0.03040 | 0.13645 | 0.00223 | 0.03416 | 0.00170 | 0.29 | 822 | 54 | 824 | 14 | 825 | 13.0 | 679 | 33 | 1.0 |
| 150127-02-16 | 397.1 | 295.3 | 1.34 | 0.04937 | 0.00160 | 0.14498 | 0.00454 | 0.02131 | 0.00036 | 0.00524 | 0.00025 | 0.20 | 165 | 77 | 137 | 4  | 136 | 2.0  | 106 | 5  | 1.0 |
| 150127-02-17 | 249.1 | 308.1 | 0.81 | 0.04876 | 0.00087 | 0.14296 | 0.00252 | 0.02127 | 0.00029 | 0.00566 | 0.00018 | 0.37 | 136 | 43 | 136 | 2  | 136 | 2.0  | 114 | 4  | 1.0 |
| 150127-02-18 | 144.8 | 200.8 | 0.72 | 0.04910 | 0.00113 | 0.15333 | 0.00343 | 0.02265 | 0.00033 | 0.00556 | 0.00020 | 0.28 | 153 | 55 | 145 | 3  | 144 | 2.0  | 112 | 4  | 1.0 |
| 150127-02-19 | 384.6 | 299.4 | 1.28 | 0.04892 | 0.00102 | 0.14168 | 0.00289 | 0.02101 | 0.00030 | 0.00509 | 0.00018 | 0.32 | 144 | 50 | 135 | 3  | 134 | 2.0  | 103 | 4  | 1.0 |
| 150127-02-20 | 79.0  | 89.2  | 0.89 | 0.04926 | 0.00161 | 0.15234 | 0.00481 | 0.02243 | 0.00035 | 0.00594 | 0.00025 | 0.17 | 160 | 78 | 144 | 4  | 143 | 2.0  | 120 | 5  | 1.0 |

L7, Baisha, Tiantou of Ningdu Basin

|    |           |     |     |      |         |         |         |         |         |         |         |         |      |     |     |     |    |     |     |     |    |     |
|----|-----------|-----|-----|------|---------|---------|---------|---------|---------|---------|---------|---------|------|-----|-----|-----|----|-----|-----|-----|----|-----|
| G1 | 124-01-01 | 42  | 372 | 0.11 | 0.05502 | 0.00065 | 0.47366 | 0.00572 | 0.06245 | 0.00085 | 0.01843 | 0.00066 | 0.58 | 413 | 27  | 394 | 4  | 391 | 5.0 | 369 | 13 | 1.0 |
|    | 124-01-02 | 58  | 437 | 0.13 | 0.05192 | 0.00060 | 0.30559 | 0.00359 | 0.04270 | 0.00056 | 0.01060 | 0.00037 | 0.57 | 282 | 27  | 271 | 3  | 270 | 3.0 | 213 | 7  | 1.0 |
|    | 124-01-03 | 143 | 38  | 3.75 | 0.04880 | 0.00299 | 0.14030 | 0.00831 | 0.02086 | 0.00043 | 0.00655 | 0.00026 | 0.07 | 138 | 139 | 133 | 7  | 133 | 3.0 | 132 | 5  | 1.0 |
|    | 124-01-04 | 113 | 30  | 3.74 | 0.04837 | 0.00691 | 0.15218 | 0.02099 | 0.02283 | 0.00093 | 0.00694 | 0.00058 | 0.02 | 117 | 287 | 144 | 18 | 146 | 6.0 | 140 | 12 | 1.0 |
|    | 124-01-05 | 58  | 493 | 0.12 | 0.04935 | 0.00090 | 0.14862 | 0.00264 | 0.02185 | 0.00030 | 0.00739 | 0.00039 | 0.35 | 164 | 44  | 141 | 2  | 139 | 2.0 | 149 | 8  | 1.0 |
|    | 124-01-06 | 144 | 144 | 1.00 | 0.04866 | 0.00126 | 0.13966 | 0.00352 | 0.02082 | 0.00030 | 0.00628 | 0.00024 | 0.24 | 131 | 62  | 133 | 3  | 133 | 2.0 | 127 | 5  | 1.0 |
|    | 124-01-07 | 180 | 62  | 2.89 | 0.04920 | 0.00247 | 0.14171 | 0.00687 | 0.02090 | 0.00040 | 0.00684 | 0.00030 | 0.11 | 157 | 115 | 135 | 6  | 133 | 3.0 | 138 | 6  | 1.0 |
|    | 124-01-08 | 941 | 382 | 2.47 | 0.04916 | 0.00095 | 0.14632 | 0.00277 | 0.02160 | 0.00030 | 0.00982 | 0.00041 | 0.34 | 155 | 46  | 139 | 2  | 138 | 2.0 | 198 | 8  | 1.0 |
|    | 124-01-09 | 43  | 22  | 1.92 | 0.04905 | 0.00573 | 0.14560 | 0.01648 | 0.02154 | 0.00069 | 0.00768 | 0.00070 | 0.03 | 150 | 253 | 138 | 15 | 137 | 4.0 | 155 | 14 | 1.0 |
|    | 124-01-10 | 13  | 115 | 0.11 | 0.04842 | 0.00130 | 0.13575 | 0.00355 | 0.02034 | 0.00030 | 0.00717 | 0.00049 | 0.23 | 120 | 64  | 129 | 3  | 130 | 2.0 | 144 | 10 | 1.0 |
|    | 124-01-11 | 167 | 98  | 1.70 | 0.05517 | 0.00103 | 0.51254 | 0.00933 | 0.06740 | 0.00095 | 0.01955 | 0.00058 | 0.35 | 419 | 43  | 420 | 6  | 420 | 6.0 | 391 | 11 | 1.0 |
|    | 124-01-13 | 295 | 108 | 2.74 | 0.04874 | 0.00130 | 0.15590 | 0.00406 | 0.02320 | 0.00035 | 0.00671 | 0.00019 | 0.25 | 135 | 64  | 147 | 4  | 148 | 2.0 | 135 | 4  | 1.0 |
|    | 124-01-14 | 195 | 385 | 0.51 | 0.05577 | 0.00113 | 0.55185 | 0.01103 | 0.07179 | 0.00113 | 0.02065 | 0.00107 | 0.38 | 443 | 46  | 446 | 7  | 447 | 7.0 | 413 | 21 | 1.0 |
|    | 124-01-15 | 83  | 27  | 3.02 | 0.04951 | 0.00363 | 0.14779 | 0.01049 | 0.02166 | 0.00050 | 0.00706 | 0.00034 | 0.06 | 172 | 167 | 140 | 9  | 138 | 3.0 | 142 | 7  | 1.0 |
|    | 124-01-16 | 216 | 167 | 1.30 | 0.06144 | 0.00131 | 0.87780 | 0.01804 | 0.10368 | 0.00147 | 0.03426 | 0.00199 | 0.29 | 654 | 47  | 640 | 10 | 636 | 9.0 | 681 | 39 | 1.0 |
|    | 124-01-17 | 136 | 34  | 3.96 | 0.04920 | 0.00400 | 0.15897 | 0.01245 | 0.02344 | 0.00060 | 0.00721 | 0.00044 | 0.04 | 157 | 184 | 150 | 11 | 149 | 4.0 | 145 | 9  | 1.0 |
|    | 124-01-18 | 101 | 55  | 1.85 | 0.05501 | 0.00254 | 0.49828 | 0.02210 | 0.06570 | 0.00132 | 0.01893 | 0.00123 | 0.13 | 413 | 106 | 411 | 15 | 410 | 8.0 | 379 | 24 | 1.0 |
|    | 124-01-19 | 157 | 34  | 4.60 | 0.05041 | 0.00259 | 0.16008 | 0.00794 | 0.02304 | 0.00044 | 0.00669 | 0.00027 | 0.10 | 214 | 120 | 151 | 7  | 147 | 3.0 | 135 | 5  | 1.0 |
|    | 124-01-20 | 319 | 318 | 1.00 | 0.05038 | 0.00105 | 0.23146 | 0.00469 | 0.03333 | 0.00047 | 0.00967 | 0.00049 | 0.31 | 213 | 49  | 211 | 4  | 211 | 3.0 | 195 | 10 | 1.0 |

|    |               |     |     |       |         |         |         |         |         |         |         |         |      |     |     |     |    |     |     |     |    |     |
|----|---------------|-----|-----|-------|---------|---------|---------|---------|---------|---------|---------|---------|------|-----|-----|-----|----|-----|-----|-----|----|-----|
| G2 | 13109-01zk-11 | 189 | 119 | 1.59  | 0.05132 | 0.00836 | 0.15216 | 0.02464 | 0.0215  | 0.0005  | 0.00828 | 0.00241 | 0.03 | 255 | 302 | 144 | 22 | 137 | 3.0 | 167 | 48 | 1.0 |
|    | 13109-01zk-19 | 459 | 29  | 15.65 | 0.04882 | 0.02988 | 0.14854 | 0.09061 | 0.02207 | 0.00115 | 0.00523 | 0.00126 | 0    | 139 | 980 | 141 | 80 | 141 | 7.0 | 105 | 25 | 1.0 |
|    | 13109-01zk-10 | 95  | 34  | 2.84  | 0.04821 | 0.03083 | 0.15019 | 0.09569 | 0.02259 | 0.00129 | 0.00681 | 0.00318 | 0    | 110 | 981 | 142 | 84 | 144 | 8.0 | 137 | 64 | 1.0 |

M16, Wushanqiu, Yanshan (Liu et al., 2009:One sample below)

|            |     |     |      |         |  |         |  |         |  |  |  |  |  |  |  |  |  |       |     |
|------------|-----|-----|------|---------|--|---------|--|---------|--|--|--|--|--|--|--|--|--|-------|-----|
| SH003-1.1  | 294 | 290 | 1.05 | 0.04740 |  | 0.14240 |  | 0.02179 |  |  |  |  |  |  |  |  |  | 139.2 | 1.5 |
| SH003-2.1  | 271 | 320 | 0.87 | 0.04500 |  | 0.13300 |  | 0.02146 |  |  |  |  |  |  |  |  |  | 137.5 | 1.4 |
| SH003-3.1  | 291 | 332 | 0.91 | 0.04600 |  | 0.13170 |  | 0.02078 |  |  |  |  |  |  |  |  |  | 133   | 1.4 |
| SH003-4.1  | 338 | 352 | 0.99 | 0.05600 |  | 0.16760 |  | 0.02169 |  |  |  |  |  |  |  |  |  | 137.1 | 1.4 |
| SH003-5.1  | 106 | 128 | 0.86 | 0.04230 |  | 0.13090 |  | 0.02245 |  |  |  |  |  |  |  |  |  | 144.2 | 1.9 |
| SH003-6.1  | 269 | 294 | 0.95 | 0.04710 |  | 0.14160 |  | 0.02182 |  |  |  |  |  |  |  |  |  | 139.4 | 1.6 |
| SH003-7.1  | 245 | 173 | 1.47 | 0.04550 |  | 0.13660 |  | 0.02179 |  |  |  |  |  |  |  |  |  | 139.5 | 1.7 |
| SH003-8.1  | 314 | 363 | 0.89 | 0.04660 |  | 0.13530 |  | 0.02106 |  |  |  |  |  |  |  |  |  | 134.7 | 1.6 |
| SH003-9.1  | 467 | 598 | 0.81 | 0.04970 |  | 0.14680 |  | 0.02143 |  |  |  |  |  |  |  |  |  | 136.5 | 1.3 |
| SH003-10.1 | 300 | 388 | 0.80 | 0.04900 |  | 0.14300 |  | 0.02118 |  |  |  |  |  |  |  |  |  | 135   | 1.6 |
| SH003-11.1 | 189 | 186 | 1.05 | 0.04070 |  | 0.11740 |  | 0.02094 |  |  |  |  |  |  |  |  |  | 134.9 | 1.7 |
| SH003-12.1 | 286 | 306 | 0.96 | 0.05940 |  | 0.18180 |  | 0.02220 |  |  |  |  |  |  |  |  |  | 139.7 | 1.6 |
| SH003-13.1 | 301 | 328 | 0.95 | 0.05110 |  | 0.14690 |  | 0.02084 |  |  |  |  |  |  |  |  |  | 132.6 | 1.4 |
| SH003-14.1 | 133 | 131 | 1.04 | 0.04470 |  | 0.13000 |  | 0.02110 |  |  |  |  |  |  |  |  |  | 135.2 | 1.8 |

M16b, Shuangling, Gui (Wu and Wu, 2013)

|            |     |      |       |         |         |         |         |          |         |  |  |  |  |  |  |  |  |       |     |
|------------|-----|------|-------|---------|---------|---------|---------|----------|---------|--|--|--|--|--|--|--|--|-------|-----|
| GX103-1.1  | 249 | 5    | 7.89  | 0.04690 | 2.60000 | 0.13440 | 3.20000 | 0.020 77 | 1.70000 |  |  |  |  |  |  |  |  | 132.5 | 2.3 |
| GX103-2.1  | 147 | 311  | 0.49  | 0.04750 | 9.00000 | 0.14100 | 9.20000 | 0.021 59 | 2.10000 |  |  |  |  |  |  |  |  | 137.7 | 2.8 |
| GX103-3.1  | 112 | 460  | 3.58  | 0.04900 | 4.10000 | 0.14450 | 4.50000 | 0.021 41 | 2.00000 |  |  |  |  |  |  |  |  | 136.6 | 2.6 |
| GX103-4.1  | 80  | 184  | 0.10  | 0.03600 | #####   | 0.10200 | #####   | 0.020 34 | 3.00000 |  |  |  |  |  |  |  |  | 129.8 | 3.9 |
| GX103-5.1  | 495 | 2761 | 2.53  | 0.04730 | 2.10000 | 0.12940 | 2.70000 | 0.019 83 | 1.60000 |  |  |  |  |  |  |  |  | 126.6 | 2.0 |
| GX103-6.1  | 262 | 215  | 3.35  | 0.05640 | #####   | 0.16100 | #####   | 0.020 71 | 2.40000 |  |  |  |  |  |  |  |  | 132.1 | 3.2 |
| GX103-7.1  | 93  | 348  | 0.98  | 0.04840 | 9.30000 | 0.13900 | 9.50000 | 0.020 83 | 2.00000 |  |  |  |  |  |  |  |  | 132.9 | 2.7 |
| GX103-8.1  | 399 | 987  | 4.95  | 0.04550 | 2.60000 | 0.12990 | 3.40000 | 0.020 71 | 2.10000 |  |  |  |  |  |  |  |  | 132.2 | 2.8 |
| GX103-9.1  | 220 | 774  | 0.52  | 0.04520 | 3.90000 | 0.13930 | 4.30000 | 0.022 33 | 1.80000 |  |  |  |  |  |  |  |  | 142.4 | 2.5 |
| GX103-10.1 | 162 | 850  | 2.03  | 0.04470 | 4.30000 | 0.13230 | 4.90000 | 0.021 46 | 2.20000 |  |  |  |  |  |  |  |  | 136.9 | 3.0 |
| GX103-11.1 | 588 | 862  | 10.00 | 0.04540 | 4.40000 | 0.13020 | 4.70000 | 0.020 81 | 1.80000 |  |  |  |  |  |  |  |  | 132.8 | 2.3 |
| GX103-12.1 | 201 | 743  | 1.17  | 0.04870 | 2.70000 | 0.13990 | 3.30000 | 0.020 83 | 1.80000 |  |  |  |  |  |  |  |  | 132.9 | 2.3 |
| GX103-13.1 | 87  | 536  | 0.48  | 0.04850 | 3.70000 | 0.15240 | 4.20000 | 0.022 81 | 1.90000 |  |  |  |  |  |  |  |  | 145.4 | 2.7 |
| GX103-14.1 | 514 | 3441 | 5.15  | 0.04826 | 1.80000 | 0.12780 | 2.40000 | 0.019 21 | 1.60000 |  |  |  |  |  |  |  |  | 122.6 | 2.0 |
| GX103-15.1 | 257 | 1101 | 4.62  | 0.04680 | 2.40000 | 0.14020 | 2.90000 | 0.021 72 | 1.70000 |  |  |  |  |  |  |  |  | 138.5 | 2.4 |

M16b, Shuangling, Gui (Shu et al., 2017)

|           |     |     |      |        |        |        |        |        |        |  |  |  |  |     |    |     |     |  |  |     |
|-----------|-----|-----|------|--------|--------|--------|--------|--------|--------|--|--|--|--|-----|----|-----|-----|--|--|-----|
| 14SY-42-1 | 325 | 303 | 1.07 | 0.0507 | 0.0037 | 0.1465 | 0.0102 | 0.0213 | 0.0005 |  |  |  |  | 139 | 9  | 136 | 3.0 |  |  | 1.0 |
| 14SY-42-2 | 235 | 230 | 1.02 | 0.0501 | 0.005  | 0.1508 | 0.0138 | 0.022  | 0.0005 |  |  |  |  | 143 | 12 | 141 | 3.0 |  |  | 1.0 |
| 14SY-42-3 | 568 | 681 | 0.83 | 0.0495 | 0.003  | 0.1456 | 0.0077 | 0.0216 | 0.0004 |  |  |  |  | 138 | 7  | 138 | 3.0 |  |  | 1.0 |
| 14SY-42-4 | 258 | 189 | 1.37 | 0.0465 | 0.004  | 0.1401 | 0.0116 | 0.0217 | 0.0005 |  |  |  |  | 133 | 10 | 139 | 3.0 |  |  | 1.0 |
| 14SY-42-5 | 188 | 211 | 0.89 | 0.0494 | 0.0057 | 0.1448 | 0.0149 | 0.0216 | 0.0005 |  |  |  |  | 137 | 13 | 138 | 3.0 |  |  | 1.0 |
| 14SY-42-6 | 293 | 361 | 0.81 | 0.0527 | 0.0038 | 0.153  | 0.0101 | 0.0214 | 0.0004 |  |  |  |  | 145 | 9  | 137 | 3.0 |  |  | 0.9 |
| 14SY-42-7 | 84  | 186 | 0.45 | 0.0485 | 0.0052 | 0.145  | 0.0148 | 0.0214 | 0.0005 |  |  |  |  | 137 | 13 | 137 | 3.0 |  |  | 1.  |



|            |      |      |       |        |        |        |        |        |        |     |    |     |      |     |
|------------|------|------|-------|--------|--------|--------|--------|--------|--------|-----|----|-----|------|-----|
| 14SY-42-17 | 257  | 271  | 0.95  | 0.0519 | 0.0041 | 0.1509 | 0.0106 | 0.0212 | 0.0004 | 143 | 9  | 135 | 3.0  | 0.9 |
| 14SY-42-18 | 406  | 422  | 0.87  | 0.0545 | 0.0119 | 0.1513 | 0.0262 | 0.0223 | 0.0015 | 143 | 23 | 142 | 10.0 | 1.0 |
| 14SY-42-19 | 306  | 292  | 1.05  | 0.0464 | 0.004  | 0.1384 | 0.011  | 0.0214 | 0.0004 | 132 | 10 | 137 | 3.0  | 1.0 |
| 14SY-42-20 | 188  | 147  | 1.28  | 0.0538 | 0.0053 | 0.155  | 0.0126 | 0.0213 | 0.0006 | 146 | 11 | 136 | 4.0  | 0.9 |
| 14SY-42-21 | 133  | 145  | 0.92  | 0.053  | 0.0052 | 0.1647 | 0.0149 | 0.022  | 0.0006 | 155 | 13 | 140 | 4.0  | 0.9 |
| 14SY-42-22 | 291  | 342  | 0.85  | 0.0486 | 0.0037 | 0.1429 | 0.0107 | 0.0213 | 0.0005 | 136 | 10 | 136 | 3.0  | 1.0 |
| 14SY-1-1   | 35   | 45   | 0.78  | 0.0529 | 0.0116 | 0.1389 | 0.0237 | 0.021  | 0.0009 | 132 | 21 | 134 | 6.0  | 1.0 |
| 14SY-1-2   | 116  | 120  | 0.97  | 0.0513 | 0.0056 | 0.1427 | 0.0132 | 0.0213 | 0.0005 | 135 | 12 | 136 | 3.0  | 1.0 |
| 14SY-1-3   | 61   | 89   | 0.69  | 0.0543 | 0.0102 | 0.1448 | 0.0195 | 0.0214 | 0.0007 | 137 | 17 | 137 | 5.0  | 1.0 |
| 14SY-1-4   | 38   | 44   | 0.85  | 0.0509 | 0.0091 | 0.1375 | 0.018  | 0.0208 | 0.0009 | 131 | 16 | 133 | 6.0  | 1.0 |
| 14SY-1-5   | 134  | 103  | 1.3   | 0.0489 | 0.0086 | 0.1378 | 0.0185 | 0.0203 | 0.0008 | 131 | 17 | 130 | 5.0  | 1.0 |
| 14SY-1-6   | 80   | 80   | 1     | 0.0556 | 0.018  | 0.1456 | 0.0379 | 0.0217 | 0.0014 | 138 | 34 | 138 | 9.0  | 1.0 |
| 14SY-1-7   | 606  | 750  | 0.81  | 0.0496 | 0.0031 | 0.1485 | 0.0095 | 0.0217 | 0.0005 | 141 | 8  | 138 | 3.0  | 1.0 |
| 14SY-1-8   | 74   | 107  | 0.69  | 0.0492 | 0.0075 | 0.1418 | 0.0205 | 0.0211 | 0.0005 | 135 | 18 | 134 | 3.0  | 1.0 |
| 14SY-1-9   | 97   | 101  | 0.96  | 0.0504 | 0.006  | 0.1577 | 0.0152 | 0.0217 | 0.0007 | 149 | 13 | 138 | 4.0  | 0.9 |
| 14SY-1-10  | 72   | 69   | 1.04  | 0.0567 | 0.017  | 0.1397 | 0.0282 | 0.0212 | 0.0016 | 133 | 25 | 135 | 10.0 | 1.0 |
| 14SY-1-11  |      |      | 0.051 |        | 0.0093 | 0.145  | 0.0184 | 0.0214 | 0.0009 | 138 | 16 | 137 | 6.0  | 1.0 |
| 14SY-1-12  | 92   | 106  | 0.87  | 0.0515 | 0.0052 | 0.1416 | 0.0113 | 0.021  | 0.0006 | 134 | 10 | 134 | 4.0  | 1.0 |
| 14SY-1-13  | 160  | 121  | 1.32  | 0.0516 | 0.0076 | 0.1479 | 0.0191 | 0.0217 | 0.0005 | 140 | 17 | 138 | 3.0  | 1.0 |
| 14SY-1-14  | 101  | 110  | 0.91  | 0.0511 | 0.0046 | 0.1449 | 0.0109 | 0.0212 | 0.0005 | 137 | 10 | 135 | 3.0  | 1.0 |
| 14SY-1-15  | 50   | 74   | 0.67  | 0.0552 | 0.0139 | 0.1555 | 0.0363 | 0.0231 | 0.0009 | 147 | 32 | 147 | 6.0  | 1.0 |
| 14SY-1-16  | 60   | 85   | 0.71  | 0.052  | 0.0068 | 0.1371 | 0.0137 | 0.0205 | 0.0007 | 130 | 12 | 131 | 4.0  | 1.0 |
| 14SY-36-1  | 313  | 725  | 0.43  | 0.0488 | 0.0031 | 0.149  | 0.0096 | 0.0221 | 0.0004 | 141 | 9  | 141 | 3.0  | 1.0 |
| 14SY-36-2  | 322  | 277  | 1.16  | 0.0484 | 0.0031 | 0.1408 | 0.0082 | 0.0212 | 0.0005 | 134 | 7  | 135 | 3.0  | 1.0 |
| 14SY-36-3  | 719  | 986  | 0.73  | 0.0524 | 0.0023 | 0.1561 | 0.0073 | 0.0215 | 0.0004 | 147 | 6  | 137 | 3.0  | 0.9 |
| 14SY-36-4  | 1275 | 1587 | 0.8   | 0.0477 | 0.0019 | 0.1412 | 0.0054 | 0.0215 | 0.0003 | 134 | 5  | 137 | 2.0  | 1.0 |
| 14SY-36-5  | 778  | 810  | 0.96  | 0.051  | 0.003  | 0.1506 | 0.009  | 0.0213 | 0.0004 | 142 | 8  | 136 | 2.0  | 1.0 |
| 14SY-36-6  | 365  | 468  | 0.78  | 0.0486 | 0.0026 | 0.1443 | 0.0074 | 0.0216 | 0.0004 | 137 | 7  | 138 | 2.0  | 1.0 |
| 14SY-36-7  | 497  | 590  | 0.84  | 0.053  | 0.0029 | 0.1517 | 0.0084 | 0.0206 | 0.0003 | 143 | 7  | 132 | 2.0  | 0.9 |
| 14SY-36-8  | 699  | 866  | 0.81  | 0.0527 | 0.003  | 0.1541 | 0.0085 | 0.0213 | 0.0004 | 146 | 8  | 136 | 3.0  | 0.9 |
| 14SY-36-9  | 313  | 288  | 1.09  | 0.0542 | 0.0083 | 0.1608 | 0.0225 | 0.0222 | 0.0007 | 151 | 20 | 142 | 4.0  | 0.9 |
| 14SY-36-10 | 745  | 1202 | 0.62  | 0.0489 | 0.0023 | 0.1412 | 0.0066 | 0.0208 | 0.0003 | 134 | 6  | 133 | 2.0  | 1.0 |
| 14SY-36-11 | 197  | 236  | 0.83  | 0.0506 | 0.0038 | 0.1455 | 0.0105 | 0.021  | 0.0004 | 138 | 9  | 134 | 3.0  | 1.0 |
| 14SY-36-12 | 258  | 196  | 1.31  | 0.0539 | 0.0048 | 0.1588 | 0.0126 | 0.0213 | 0.0005 | 150 | 11 | 136 | 3.0  | 0.9 |
| 14SY-36-13 | 912  | 1179 | 0.77  | 0.0541 | 0.0033 | 0.1618 | 0.0081 | 0.0219 | 0.0004 | 152 | 7  | 139 | 2.0  | 0.9 |
| 14SY-36-14 | 394  | 379  | 1.04  | 0.051  | 0.0037 | 0.1477 | 0.0106 | 0.021  | 0.0004 | 140 | 9  | 134 | 2.0  | 1.0 |
| 14SY-36-15 | 150  | 149  | 1.01  | 0.0493 | 0.0055 | 0.1521 | 0.0158 | 0.0226 | 0.0007 | 144 | 14 | 144 | 4.0  | 1.0 |
| 14SY-36-16 | 170  | 200  | 0.85  | 0.0494 | 0.0037 | 0.1452 | 0.0101 | 0.0214 | 0.0004 | 138 | 9  | 137 | 3.0  | 1.0 |
| 14SY-36-17 | 832  | 1243 | 0.67  | 0.054  | 0.0025 | 0.1651 | 0.0082 | 0.0221 | 0.0004 | 155 | 7  | 141 | 2.0  | 0.9 |
| 14SY-17-1  | 1924 | 2944 | 0.65  | 0.0455 | 0.0018 | 0.1354 | 0.0056 | 0.0214 | 0.0003 | 129 | 5  | 137 | 2.0  | 1.1 |
| 14SY-17-2  | 2723 | 3528 | 0.77  | 0.0469 | 0.0021 | 0.1379 | 0.0064 | 0.0211 | 0.0003 | 131 | 6  | 135 | 2.0  | 1.0 |
| 14SY-17-3  | 2580 | 3809 | 0.68  | 0.0474 | 0.0021 | 0.1381 | 0.0062 | 0.021  | 0.0003 | 131 | 6  | 134 | 2.0  | 1.0 |
| 14SY-17-4  | 1313 | 2173 | 0.6   | 0.0473 | 0.0019 | 0.1427 | 0.0059 | 0.0217 | 0.0003 | 135 | 5  | 138 | 2.0  | 1.0 |
| 14SY-17-5  | 1768 | 3175 | 0.56  | 0.046  | 0.0016 | 0.1388 | 0.0044 | 0.0217 | 0.0002 | 132 | 4  | 138 | 2.0  | 1.0 |
| 14SY-17-6  | 1620 | 2394 | 0.68  | 0.0505 | 0.0022 | 0.1508 | 0.0059 | 0.0215 | 0.0003 | 143 | 5  | 137 | 2.0  | 1.0 |
| 14SY-17-7  | 843  | 1852 | 0.46  | 0.048  | 0.0023 | 0.1411 | 0.0069 | 0.021  | 0.0003 | 134 | 6  | 134 | 2.0  | 1.0 |
| 14SY-17-8  | 1412 | 2638 | 0.54  | 0.0486 | 0.0018 | 0.1464 | 0.005  | 0.0216 | 0.0003 | 139 | 4  | 138 | 2.0  | 1.0 |
| 14SY-17-9  | 2114 | 3362 | 0.63  | 0.0504 | 0.0026 | 0.146  | 0.0066 | 0.0209 | 0.0004 | 138 | 6  | 134 | 3.0  | 1.0 |
| 14SY-17-10 | 896  | 1738 | 0.52  | 0.0479 | 0.0033 | 0.1463 | 0.0099 | 0.0219 | 0.0005 | 139 | 9  | 140 | 3.0  | 1.0 |
| 14SY-17-11 | 1414 | 2426 | 0.58  | 0.0487 | 0.0015 | 0.1483 | 0.0046 | 0.0218 | 0.0003 | 140 | 4  | 139 | 2.0  | 1.0 |
| 14SY-17-12 | 1264 | 1923 | 0.66  | 0.049  | 0.0019 | 0.142  | 0.0052 | 0.0208 | 0.0002 | 135 | 5  | 133 | 1.0  | 1.0 |
| 14SY-17-13 | 1266 | 2051 | 0.62  | 0.0462 | 0.0017 | 0.1374 | 0.0051 | 0.0213 | 0.0003 | 131 | 5  | 136 | 2.0  | 1.0 |
| 14SY-17-14 | 1251 | 2123 | 0.59  | 0.0503 | 0.0021 | 0.1464 | 0.0059 | 0.021  | 0.0003 | 139 | 5  | 134 | 2.0  | 1.0 |
| 14SY-17-15 | 1757 | 3131 | 0.56  | 0.0468 | 0.0018 | 0.1375 | 0.0057 | 0.0211 | 0.0002 | 131 | 5  | 134 | 1.0  | 1.0 |
| 14SY-17-16 | 1771 | 2489 | 0.71  | 0.0554 | 0.0023 | 0.1673 | 0.0069 | 0.0217 | 0.0003 | 157 | 6  | 139 | 2.0  | 0.9 |
| 14SY-17-17 | 3793 | 3888 | 0.98  | 0.0535 | 0.0018 | 0.1563 | 0.0056 | 0.021  | 0.0003 | 147 | 5  | 134 | 2.0  | 0.9 |
| 14SY-17-18 | 702  | 1557 | 0.45  | 0.051  | 0.0016 | 0.1485 | 0.0047 | 0.021  | 0.0003 | 141 | 4  | 134 | 2.0  | 1.0 |
| 14SY-17-19 | 865  | 1637 | 0.53  | 0.0516 | 0.0024 | 0.1476 | 0.0064 | 0.0208 | 0.0003 | 140 | 6  | 133 | 2.0  | 1.0 |
| 14SY-17-20 | 1560 | 2391 | 0.65  | 0.0508 | 0.0016 | 0.1494 | 0.005  | 0.0212 | 0.0003 | 141 | 4  | 135 | 2.0  | 1.0 |

M17, Tianhuashan basin near the boundary of Fujian and Jiangxi (Su et al., 2013; LSK-30 from Su et al., 2014)

|           |     |      |      |         |         |         |         |         |         |     |      |     |   |     |     |     |
|-----------|-----|------|------|---------|---------|---------|---------|---------|---------|-----|------|-----|---|-----|-----|-----|
| LSK-30-1  | 331 | 512  | 0.65 | 0.04680 | 0.00044 | 0.14132 | 0.00403 | 0.02164 | 0.00031 | 39  | 22   | 134 | 4 | 138 | 2.0 | 1.0 |
| LSK-30-2  | 272 | 330  | 0.82 | 0.04812 | 0.00074 | 0.14981 | 0.00700 | 0.02211 | 0.00041 | 106 | 32   | 142 | 6 | 141 | 3.0 | 1.0 |
| LSK-30-3  | 392 | 516  | 0.76 | 0.04646 | 0.00028 | 0.14048 | 0.00286 | 0.02190 | 0.00041 | 20  | 15   | 133 | 3 | 140 | 3.0 | 1.1 |
| LSK-30-4  | 116 | 189  | 0.61 | 0.04990 | 0.00147 | 0.15216 | 0.00487 | 0.02218 | 0.00029 | 191 | 69   | 144 | 4 | 141 | 2.0 | 1.0 |
| LSK-30-5  | 306 | 392  | 0.78 | 0.04777 | 0.00144 | 0.14752 | 0.00531 | 0.02224 | 0.00040 | 87  | 77   | 140 | 5 | 142 | 3.0 | 1.0 |
| LSK-30-6  | 798 | 737  | 1.08 | 0.04629 | 0.00024 | 0.13812 | 0.00107 | 0.02166 | 0.00014 | 13  | -183 | 131 | 1 | 138 | 1.0 | 1.1 |
| LSK-30-7  | 350 | 338  | 1.03 | 0.04853 | 0.00047 | 0.14789 | 0.00128 | 0.02223 | 0.00017 | 124 | 22   | 140 | 1 | 142 | 1.0 | 1.0 |
| LSK-30-8  | 925 | 706  | 1.31 | 0.04688 | 0.00038 | 0.14307 | 0.00138 | 0.02216 | 0.00015 | 43  | 14   | 136 | 1 | 141 | 1.0 | 1.0 |
| LSK-30-9  | 281 | 390  | 0.72 | 0.04638 | 0.00028 | 0.13787 | 0.00111 | 0.02159 | 0.00015 | 17  | -184 | 131 | 1 | 138 | 1.0 | 1.1 |
| LSK-30-10 | 503 | 638  | 0.79 | 0.04765 | 0.00065 | 0.14386 | 0.00239 | 0.02187 | 0.00015 | 83  | 33   | 136 | 2 | 139 | 1.0 | 1.0 |
| LSK-30-11 | 936 | 1028 | 0.91 | 0.05089 | 0.00030 | 0.15700 | 0.00163 | 0.02235 | 0.00017 | 235 | 15   | 148 | 1 | 142 | 1.0 | 1.0 |
| LSK-30-12 | 558 | 609  | 0.92 | 0.04925 | 0.00118 | 0.15393 | 0.00585 | 0.02222 | 0.00026 | 167 | 57   | 145 | 5 | 142 | 2.0 | 1.0 |
| LSK-30-13 | 637 | 743  | 0.86 | 0.04933 | 0.00134 | 0.15274 | 0.00564 | 0.02215 | 0.00019 | 165 | 68   | 144 | 5 | 141 | 1.0 | 1.0 |
| LSK-30-14 | 132 | 231  | 0.57 | 0.05040 | 0.00168 | 0.15436 | 0.00551 | 0.02234 | 0.00028 | 213 | 50   | 146 | 5 | 142 | 2.0 | 1.0 |
| LSK-30-15 | 513 | 560  | 0.92 | 0.04702 | 0.00122 | 0.14548 | 0.00761 | 0.02180 | 0.00023 | 50  | 59   | 138 | 7 | 139 | 1.0 | 1.0 |
| LSK-30-16 | 619 | 750  | 0.83 | 0.04666 | 0.00090 | 0.14111 | 0.00419 | 0.02167 | 0.00017 | 32  | 44   | 134 | 4 | 138 | 1.0 | 1.0 |
| LSK107-01 | 153 | 132  | 1.16 | 0.05001 | 0.00265 | 0.14968 | 0.00761 | 0.02181 | 0.00035 | 195 | 122  | 142 | 7 | 139 | 2.0 | 1.0 |
| LSK107-02 | 432 | 701  | 0.62 | 0.04795 | 0.00051 | 0.14575 | 0.00229 | 0.02209 | 0.00025 | 98  | 21   | 138 | 2 | 141 | 2.0 | 1.0 |



|           |      |      |      |         |         |         |         |         |         |      |     |      |     |      |      |     |
|-----------|------|------|------|---------|---------|---------|---------|---------|---------|------|-----|------|-----|------|------|-----|
| LSK107-03 | 4    | 760  | 0    | 0.05535 | 0.00030 | 0.51550 | 0.00711 | 0.06788 | 0.00091 | 428  | 13  | 422  | 5   | 423  | 5.0  | 1.0 |
| LSK107-04 | 222  | 365  | 0.61 | 0.04845 | 0.00043 | 0.14693 | 0.00201 | 0.02202 | 0.00021 | 120  | 20  | 139  | 2   | 140  | 1.0  | 1.0 |
| LSK107-05 | 27   | 447  | 0.06 | 0.05696 | 0.00038 | 0.56248 | 0.01903 | 0.06916 | 0.00118 | 500  | 15  | 453  | 12  | 431  | 7.0  | 1.0 |
| LSK107-06 | 161  | 131  | 1.23 | 0.04997 | 0.00090 | 0.15304 | 0.00295 | 0.02231 | 0.00023 | 195  | 43  | 145  | 3   | 142  | 1.0  | 1.0 |
| LSK107-07 | 199  | 130  | 1.53 | 0.05145 | 0.00101 | 0.15855 | 0.00332 | 0.02242 | 0.00023 | 261  | 44  | 149  | 3   | 143  | 1.0  | 1.0 |
| LSK107-08 | 135  | 118  | 1.14 | 0.05053 | 0.00072 | 0.15466 | 0.00257 | 0.02222 | 0.00020 | 220  | 33  | 146  | 2   | 142  | 1.0  | 1.0 |
| LSK107-09 | 73   | 645  | 0.11 | 0.05549 | 0.00018 | 0.52171 | 0.00493 | 0.06821 | 0.00061 | 432  | 3   | 426  | 3   | 425  | 4.0  | 1.0 |
| LSK107-10 | 156  | 296  | 0.53 | 0.06668 | 0.00023 | 1.15141 | 0.00954 | 0.12520 | 0.00093 | 828  | 7   | 778  | 5   | 760  | 5.0  | 1.0 |
| LSK107-11 | 215  | 126  | 1.71 | 0.10043 | 0.00029 | 3.90099 | 0.03124 | 0.28175 | 0.00222 | 1632 | 6   | 1614 | 6   | 1600 | 11.0 | 1.0 |
| LSK107-12 | 147  | 73   | 2.03 | 0.04995 | 0.00358 | 0.15290 | 0.01045 | 0.02228 | 0.00047 | 195  | 167 | 144  | 9   | 142  | 3.0  | 1.0 |
| LSK107-13 | 121  | 82   | 1.48 | 0.05117 | 0.00129 | 0.15650 | 0.00410 | 0.02223 | 0.00021 | 256  | 57  | 148  | 4   | 142  | 1.0  | 1.0 |
| LSK107-14 | 28   | 123  | 0.23 | 0.05659 | 0.00054 | 0.53256 | 0.00736 | 0.06820 | 0.00064 | 476  | 20  | 434  | 5   | 425  | 4.0  | 1.0 |
| LSK107-15 | 411  | 543  | 0.76 | 0.05124 | 0.00036 | 0.15795 | 0.00130 | 0.02239 | 0.00016 | 250  | 49  | 149  | 1   | 143  | 1.0  | 1.0 |
| LSK107-16 | 42   | 61   | 0.69 | 0.04857 | 0.00543 | 0.14505 | 0.01579 | 0.02177 | 0.00096 | 128  | 244 | 138  | 14  | 139  | 6.0  | 1.0 |
| LSK107-17 | 151  | 103  | 1.47 | 0.05101 | 0.00151 | 0.15808 | 0.00476 | 0.02248 | 0.00017 | 243  | 69  | 149  | 4   | 143  | 1.0  | 1.0 |
| LSK107-18 | 132  | 88   | 1.5  | 0.05107 | 0.00113 | 0.15852 | 0.00370 | 0.02252 | 0.00019 | 243  | 52  | 149  | 3   | 144  | 1.0  | 1.0 |
| LSK107-19 | 366  | 176  | 2.09 | 0.05173 | 0.00074 | 0.15886 | 0.00233 | 0.02234 | 0.00017 | 272  | 33  | 150  | 2   | 142  | 1.0  | 0.9 |
| LSK107-20 | 14   | 550  | 0.02 | 0.05588 | 0.00023 | 0.52440 | 0.00455 | 0.06805 | 0.00053 | 456  | 9   | 428  | 3   | 424  | 3.0  | 1.0 |
| LSK107-21 | 14   | 855  | 0.02 | 0.05553 | 0.00021 | 0.51946 | 0.00332 | 0.06783 | 0.00035 | 435  | 5   | 425  | 2   | 423  | 2.0  | 1.0 |
|           |      |      |      |         |         |         |         |         |         |      |     |      |     |      |      |     |
| MD06-01   | 249  | 203  | 1.22 | 0.04890 | 0.00272 | 0.14552 | 0.00788 | 0.02158 | 0.00027 | 143  | 100 | 138  | 7   | 138  | 2.0  | 1.0 |
| MD06-02   | 229  | 173  | 1.33 | 0.04879 | 0.00478 | 0.14358 | 0.01380 | 0.02134 | 0.00041 | 138  | 179 | 136  | 12  | 136  | 3.0  | 1.0 |
| MD06-04   | 120  | 129  | 0.93 | 0.05008 | 0.00604 | 0.14780 | 0.01753 | 0.02141 | 0.00050 | 199  | 224 | 140  | 16  | 137  | 3.0  | 1.0 |
| MD06-05   | 294  | 211  | 1.39 | 0.04888 | 0.00292 | 0.14619 | 0.00859 | 0.02169 | 0.00024 | 142  | 112 | 139  | 8   | 138  | 2.0  | 1.0 |
| MD06-06   | 2693 | 3909 | 0.69 | 0.04883 | 0.00083 | 0.14354 | 0.00215 | 0.02132 | 0.00015 | 140  | 22  | 136  | 2   | 136  | 1.0  | 1.0 |
| MD06-07   | 132  | 134  | 0.98 | 0.04942 | 0.00503 | 0.14443 | 0.01442 | 0.02120 | 0.00044 | 168  | 186 | 137  | 13  | 135  | 3.0  | 1.0 |
| MD06-08   | 81   | 99   | 0.81 | 0.04955 | 0.00506 | 0.14537 | 0.01461 | 0.02128 | 0.00040 | 174  | 191 | 138  | 13  | 136  | 3.0  | 1.0 |
| MD06-09   | 214  | 239  | 0.89 | 0.04857 | 0.00297 | 0.14448 | 0.00860 | 0.02158 | 0.00031 | 127  | 107 | 137  | 8   | 138  | 2.0  | 1.0 |
| MD06-10   | 68   | 111  | 0.61 | 0.04861 | 0.00528 | 0.14343 | 0.01541 | 0.02140 | 0.00035 | 129  | 211 | 136  | 14  | 136  | 2.0  | 1.0 |
| MD06-11   | 1379 | 1990 | 0.69 | 0.05015 | 0.00120 | 0.14750 | 0.00327 | 0.02133 | 0.00017 | 202  | 37  | 140  | 3   | 136  | 1.0  | 1.0 |
| MD06-12   | 301  | 254  | 1.19 | 0.04872 | 0.00298 | 0.14469 | 0.00869 | 0.02154 | 0.00024 | 134  | 114 | 137  | 8   | 137  | 2.0  | 1.0 |
| MD06-13   | 204  | 233  | 0.88 | 0.04911 | 0.00207 | 0.14622 | 0.00597 | 0.02160 | 0.00022 | 153  | 76  | 139  | 5   | 138  | 1.0  | 1.0 |
| MD06-14   | 192  | 171  | 1.13 | 0.04851 | 0.00341 | 0.14370 | 0.00994 | 0.02149 | 0.00027 | 124  | 131 | 136  | 9   | 137  | 2.0  | 1.0 |
| MD06-15   | 109  | 118  | 0.93 | 0.04928 | 0.00550 | 0.14526 | 0.01602 | 0.02138 | 0.00038 | 161  | 215 | 138  | 14  | 136  | 2.0  | 1.0 |
| MD06-16   | 266  | 214  | 1.24 | 0.04910 | 0.00241 | 0.14437 | 0.00689 | 0.02133 | 0.00024 | 153  | 89  | 137  | 6   | 136  | 2.0  | 1.0 |
| MD06-17   | 121  | 137  | 0.88 | 0.04840 | 0.00749 | 0.14232 | 0.02161 | 0.02133 | 0.00066 | 119  | 256 | 135  | 19  | 136  | 4.0  | 1.0 |
| MD06-18   | 229  | 168  | 1.36 | 0.04869 | 0.00524 | 0.14360 | 0.01519 | 0.02139 | 0.00043 | 133  | 199 | 136  | 13  | 136  | 3.0  | 1.0 |
| MD06-19   | 128  | 171  | 0.75 | 0.04937 | 0.00646 | 0.14526 | 0.01867 | 0.02134 | 0.00056 | 165  | 237 | 138  | 17  | 136  | 4.0  | 1.0 |
| MD06-20   | 114  | 108  | 1.05 | 0.04873 | 0.00523 | 0.14388 | 0.01524 | 0.02142 | 0.00039 | 135  | 204 | 136  | 14  | 137  | 2.0  | 1.0 |
| MD06-21   | 461  | 264  | 1.74 | 0.04890 | 0.00307 | 0.14422 | 0.00884 | 0.02139 | 0.00030 | 143  | 112 | 137  | 8   | 136  | 2.0  | 1.0 |
| MD06-22   | 96   | 88   | 1.09 | 0.04876 | 0.00633 | 0.14384 | 0.01843 | 0.02140 | 0.00046 | 136  | 241 | 136  | 16  | 136  | 3.0  | 1.0 |
| MD06-23   | 224  | 231  | 0.97 | 0.04888 | 0.00270 | 0.14358 | 0.00774 | 0.02131 | 0.00024 | 142  | 102 | 136  | 7   | 136  | 2.0  | 1.0 |
| MD06-24   | 624  | 563  | 1.11 | 0.04868 | 0.00181 | 0.14365 | 0.00514 | 0.02141 | 0.00021 | 132  | 65  | 136  | 5   | 137  | 1.0  | 1.0 |
| MD06-25   | 130  | 124  | 1.05 | 0.04930 | 0.00374 | 0.14531 | 0.01080 | 0.02138 | 0.00032 | 162  | 140 | 138  | 10  | 136  | 2.0  | 1.0 |
| MD06-26   | 160  | 151  | 1.06 | 0.04914 | 0.00322 | 0.14465 | 0.00928 | 0.02135 | 0.00028 | 155  | 120 | 137  | 8   | 136  | 2.0  | 1.0 |
| MD06-27   | 265  | 223  | 1.19 | 0.04892 | 0.00311 | 0.14394 | 0.00892 | 0.02134 | 0.00031 | 144  | 113 | 137  | 8   | 136  | 2.0  | 1.0 |
| MD06-28   | 175  | 148  | 1.18 | 0.04877 | 0.00396 | 0.14340 | 0.01140 | 0.02133 | 0.00035 | 137  | 147 | 136  | 10  | 136  | 2.0  | 1.0 |
| MD06-29   | 177  | 149  | 1.18 | 0.04871 | 0.00500 | 0.14352 | 0.01452 | 0.02137 | 0.00040 | 134  | 191 | 136  | 13  | 136  | 3.0  | 1.0 |
| MD06-30   | 227  | 185  | 1.23 | 0.04944 | 0.00282 | 0.14533 | 0.00807 | 0.02132 | 0.00027 | 169  | 103 | 138  | 7   | 136  | 2.0  | 1.0 |
| MD06-31   | 417  | 373  | 1.12 | 0.04931 | 0.00192 | 0.14495 | 0.00543 | 0.02133 | 0.00021 | 163  | 69  | 137  | 5   | 136  | 1.0  | 1.0 |
| MD06-32   | 267  | 185  | 1.44 | 0.04909 | 0.00270 | 0.14555 | 0.00783 | 0.02151 | 0.00023 | 152  | 103 | 138  | 7   | 137  | 1.0  | 1.0 |
| MD06-33   | 884  | 869  | 1.02 | 0.04838 | 0.00185 | 0.14348 | 0.00526 | 0.02151 | 0.00022 | 118  | 66  | 136  | 5   | 137  | 1.0  | 1.0 |
| MD06-34   | 886  | 1100 | 0.81 | 0.04920 | 0.00182 | 0.14509 | 0.00514 | 0.02139 | 0.00022 | 157  | 64  | 138  | 5   | 136  | 1.0  | 1.0 |
| MD06-35   | 373  | 429  | 0.87 | 0.04959 | 0.00195 | 0.14582 | 0.00553 | 0.02133 | 0.00021 | 176  | 70  | 138  | 5   | 136  | 1.0  | 1.0 |
| MD06-36   | 147  | 145  | 1.01 | 0.04911 | 0.00443 | 0.14496 | 0.01288 | 0.02141 | 0.00034 | 153  | 170 | 137  | 11  | 137  | 2.0  | 1.0 |
| MD06-37   | 1787 | 1579 | 1.13 | 0.04940 | 0.00119 | 0.14664 | 0.00329 | 0.02153 | 0.00017 | 167  | 38  | 139  | 3   | 137  | 1.0  | 1.0 |
| MD06-38   | 133  | 124  | 1.07 | 0.04884 | 0.00422 | 0.14363 | 0.01224 | 0.02133 | 0.00031 | 140  | 164 | 136  | 11  | 136  | 2.0  | 1.0 |
| MD06-39   | 313  | 205  | 1.53 | 0.04890 | 0.00363 | 0.14414 | 0.01046 | 0.02138 | 0.00034 | 143  | 133 | 137  | 9   | 136  | 2.0  | 1.0 |
| MD06-41   | 300  | 288  | 1.04 | 0.05016 | 0.00314 | 0.14857 | 0.00905 | 0.02149 | 0.00030 | 202  | 114 | 141  | 8</ |      |      |     |



|                                                 |      |      |      |         |         |         |         |         |         |         |         |      |     |      |     |      |      |     |     |     |
|-------------------------------------------------|------|------|------|---------|---------|---------|---------|---------|---------|---------|---------|------|-----|------|-----|------|------|-----|-----|-----|
| SH10-15-24                                      | 788  | 2003 | 0.39 | 0.05228 | 0.00107 | 0.14506 | 0.00266 | 0.02013 | 0.00015 | 298     | 28      | 138  | 2   | 129  | 1.0 | 0.9  |      |     |     |     |
| SH10-15-25                                      | 1270 | 2849 | 0.45 | 0.04965 | 0.00090 | 0.13768 | 0.00219 | 0.02012 | 0.00014 | 179     | 24      | 131  | 2   | 128  | 1.0 | 1.0  |      |     |     |     |
| SH10-15-26                                      | 989  | 2465 | 0.4  | 0.04931 | 0.00075 | 0.13544 | 0.00172 | 0.01993 | 0.00013 | 163     | 18      | 129  | 2   | 127  | 1.0 | 1.0  |      |     |     |     |
| SH10-15-27                                      | 966  | 2121 | 0.46 | 0.04936 | 0.00119 | 0.13739 | 0.00316 | 0.02019 | 0.00014 | 165     | 58      | 131  | 3   | 129  | 1.0 | 1.0  |      |     |     |     |
| SH10-15-28                                      | 686  | 1852 | 0.37 | 0.04965 | 0.00189 | 0.14064 | 0.00511 | 0.02055 | 0.00021 | 179     | 66      | 134  | 5   | 131  | 1.0 | 1.0  |      |     |     |     |
| SH10-15-29                                      | 833  | 1959 | 0.43 | 0.04884 | 0.00125 | 0.13470 | 0.00321 | 0.02001 | 0.00016 | 140     | 41      | 128  | 3   | 128  | 1.0 | 1.0  |      |     |     |     |
| SH10-15-30                                      | 735  | 1248 | 0.59 | 0.04950 | 0.00126 | 0.13857 | 0.00329 | 0.02031 | 0.00016 | 172     | 41      | 132  | 3   | 130  | 1.0 | 1.0  |      |     |     |     |
| SH10-15-32                                      | 553  | 1112 | 0.5  | 0.05030 | 0.00110 | 0.14093 | 0.00281 | 0.02033 | 0.00015 | 209     | 32      | 134  | 3   | 130  | 1.0 | 1.0  |      |     |     |     |
| SH10-15-33                                      | 1158 | 1957 | 0.59 | 0.04912 | 0.00162 | 0.14832 | 0.00464 | 0.02191 | 0.00020 | 154     | 56      | 140  | 4   | 140  | 1.0 | 1.0  |      |     |     |     |
| SH10-15-34                                      | 703  | 1707 | 0.41 | 0.05074 | 0.00131 | 0.14274 | 0.00342 | 0.02041 | 0.00016 | 229     | 41      | 135  | 3   | 130  | 1.0 | 1.0  |      |     |     |     |
| SH10-15-35                                      | 1087 | 2852 | 0.38 | 0.04779 | 0.00134 | 0.14540 | 0.00382 | 0.02207 | 0.00018 | 89      | 47      | 138  | 3   | 141  | 1.0 | 1.0  |      |     |     |     |
| SH10-15-37                                      | 613  | 1643 | 0.37 | 0.04765 | 0.00203 | 0.14472 | 0.00594 | 0.02203 | 0.00024 | 82      | 71      | 137  | 5   | 140  | 2.0 | 1.0  |      |     |     |     |
| SH10-15-38                                      | 522  | 1807 | 0.29 | 0.04877 | 0.00205 | 0.14678 | 0.00594 | 0.02183 | 0.00023 | 137     | 75      | 139  | 5   | 139  | 1.0 | 1.0  |      |     |     |     |
| SH10-15-39                                      | 666  | 1612 | 0.41 | 0.04937 | 0.00107 | 0.13717 | 0.00272 | 0.02016 | 0.00015 | 165     | 32      | 131  | 2   | 129  | 1.0 | 1.0  |      |     |     |     |
| SH10-15-40                                      | 620  | 1755 | 0.35 | 0.04877 | 0.00163 | 0.14752 | 0.00468 | 0.02194 | 0.00020 | 137     | 57      | 140  | 4   | 140  | 1.0 | 1.0  |      |     |     |     |
| SH10-15-41                                      | 241  | 312  | 0.77 | 0.04836 | 0.00284 | 0.13725 | 0.00783 | 0.02059 | 0.00027 | 117     | 104     | 131  | 7   | 131  | 2.0 | 1.0  |      |     |     |     |
| SH10-15-42                                      | 980  | 2242 | 0.44 | 0.04707 | 0.00185 | 0.14290 | 0.00539 | 0.02203 | 0.00022 | 53      | 64      | 136  | 5   | 140  | 1.0 | 1.0  |      |     |     |     |
| SH10-15-43                                      | 530  | 1444 | 0.37 | 0.05005 | 0.00138 | 0.15064 | 0.00390 | 0.02183 | 0.00018 | 197     | 45      | 142  | 3   | 139  | 1.0 | 1.0  |      |     |     |     |
| SH10-15-44                                      | 353  | 1240 | 0.28 | 0.04857 | 0.00132 | 0.13487 | 0.00345 | 0.02014 | 0.00016 | 127     | 45      | 128  | 3   | 129  | 1.0 | 1.0  |      |     |     |     |
| SH10-27-01                                      | 1771 | 2892 | 0.61 | 0.04955 | 0.00090 | 0.15471 | 0.00248 | 0.02276 | 0.00016 | 174     | 24      | 146  | 2   | 145  | 1.0 | 1.0  |      |     |     |     |
| SH10-27-02                                      | 2997 | 4581 | 0.65 | 0.04970 | 0.00115 | 0.15457 | 0.00329 | 0.02266 | 0.00018 | 181     | 35      | 146  | 3   | 144  | 1.0 | 1.0  |      |     |     |     |
| SH10-27-03                                      | 980  | 1695 | 0.58 | 0.04727 | 0.00118 | 0.14480 | 0.00336 | 0.02232 | 0.00018 | 63      | 39      | 137  | 3   | 142  | 1.0 | 1.0  |      |     |     |     |
| SH10-27-04                                      | 2079 | 3329 | 0.62 | 0.04878 | 0.00112 | 0.14869 | 0.00315 | 0.02220 | 0.00017 | 137     | 35      | 141  | 3   | 142  | 1.0 | 1.0  |      |     |     |     |
| SH10-27-05                                      | 2972 | 3557 | 0.84 | 0.05182 | 0.00112 | 0.15747 | 0.00312 | 0.02214 | 0.00017 | 277     | 31      | 148  | 3   | 141  | 1.0 | 1.0  |      |     |     |     |
| SH10-27-06                                      | 1666 | 3053 | 0.55 | 0.04903 | 0.00108 | 0.15107 | 0.00305 | 0.02244 | 0.00017 | 149     | 33      | 143  | 3   | 143  | 1.0 | 1.0  |      |     |     |     |
| SH10-27-07                                      | 1412 | 2245 | 0.63 | 0.04900 | 0.00092 | 0.15281 | 0.00255 | 0.02271 | 0.00016 | 148     | 26      | 144  | 2   | 145  | 1.0 | 1.0  |      |     |     |     |
| SH10-27-08                                      | 2627 | 3477 | 0.76 | 0.04721 | 0.00094 | 0.14818 | 0.00265 | 0.02285 | 0.00017 | 60      | 28      | 140  | 2   | 146  | 1.0 | 1.0  |      |     |     |     |
| SH10-27-09                                      | 1876 | 3383 | 0.55 | 0.04764 | 0.00094 | 0.14703 | 0.00261 | 0.02247 | 0.00016 | 81      | 29      | 139  | 2   | 143  | 1.0 | 1.0  |      |     |     |     |
| SH10-27-10                                      | 1433 | 2372 | 0.6  | 0.04825 | 0.00107 | 0.14695 | 0.00299 | 0.02217 | 0.00017 | 112     | 33      | 139  | 3   | 141  | 1.0 | 1.0  |      |     |     |     |
| SH10-27-11                                      | 2204 | 2630 | 0.84 | 0.05196 | 0.00112 | 0.15914 | 0.00314 | 0.02229 | 0.00017 | 284     | 31      | 150  | 3   | 142  | 1.0 | 0.9  |      |     |     |     |
| SH10-27-12                                      | 63   | 122  | 0.52 | 0.05550 | 0.00171 | 0.54444 | 0.01600 | 0.07138 | 0.00065 | 432     | 49      | 441  | 11  | 444  | 4.0 | 1.0  |      |     |     |     |
| SH10-27-13                                      | 3496 | 3800 | 0.92 | 0.04900 | 0.00099 | 0.15234 | 0.00279 | 0.02261 | 0.00017 | 148     | 29      | 144  | 2   | 144  | 1.0 | 1.0  |      |     |     |     |
| SH10-27-14                                      | 1098 | 1838 | 0.6  | 0.04770 | 0.00162 | 0.14630 | 0.00475 | 0.02230 | 0.00021 | 84      | 57      | 139  | 4   | 142  | 1.0 | 1.0  |      |     |     |     |
| SH10-27-15                                      | 1384 | 2238 | 0.62 | 0.04799 | 0.00132 | 0.14871 | 0.00386 | 0.02253 | 0.00019 | 99      | 45      | 141  | 3   | 144  | 1.0 | 1.0  |      |     |     |     |
| SH10-27-16                                      | 1563 | 1981 | 0.79 | 0.04830 | 0.00132 | 0.15251 | 0.00392 | 0.02295 | 0.00019 | 114     | 45      | 144  | 3   | 146  | 1.0 | 1.0  |      |     |     |     |
| SH10-27-17                                      | 1635 | 2805 | 0.58 | 0.04796 | 0.00096 | 0.14835 | 0.00270 | 0.02248 | 0.00016 | 97      | 30      | 140  | 2   | 143  | 1.0 | 1.0  |      |     |     |     |
| SH10-27-18                                      | 1430 | 2204 | 0.65 | 0.04636 | 0.00118 | 0.14359 | 0.00342 | 0.02250 | 0.00018 | 16      | 36      | 136  | 3   | 143  | 1.0 | 1.1  |      |     |     |     |
| SH10-27-19                                      | 1498 | 2358 | 0.64 | 0.04645 | 0.00154 | 0.14557 | 0.00461 | 0.02277 | 0.00021 | 21      | 50      | 138  | 4   | 145  | 1.0 | 1.1  |      |     |     |     |
| SH10-27-20                                      | 2881 | 3697 | 0.78 | 0.04793 | 0.00088 | 0.14956 | 0.00245 | 0.02267 | 0.00016 | 96      | 25      | 142  | 2   | 145  | 1.0 | 1.0  |      |     |     |     |
| SH10-27-21                                      | 3072 | 3705 | 0.83 | 0.04806 | 0.00089 | 0.15283 | 0.00253 | 0.02309 | 0.00017 | 102     | 25      | 144  | 2   | 147  | 1.0 | 1.0  |      |     |     |     |
| SH10-27-22                                      | 1557 | 2446 | 0.64 | 0.04892 | 0.00092 | 0.15101 | 0.00255 | 0.02241 | 0.00016 | 144     | 26      | 143  | 2   | 143  | 1.0 | 1.0  |      |     |     |     |
| SH10-27-23                                      | 1354 | 2215 | 0.61 | 0.04744 | 0.00123 | 0.14917 | 0.00362 | 0.02282 | 0.00019 | 71      | 41      | 141  | 3   | 145  | 1.0 | 1.0  |      |     |     |     |
| SH10-27-24                                      | 1961 | 2389 | 0.82 | 0.04886 | 0.00104 | 0.15372 | 0.00299 | 0.02283 | 0.00017 | 141     | 32      | 145  | 3   | 146  | 1.0 | 1.0  |      |     |     |     |
| SH10-27-25                                      | 2112 | 3125 | 0.68 | 0.05015 | 0.00101 | 0.15461 | 0.00283 | 0.02237 | 0.00017 | 202     | 28      | 146  | 2   | 143  | 1.0 | 1.0  |      |     |     |     |
| SH10-27-26                                      | 2882 | 3305 | 0.87 | 0.04809 | 0.00083 | 0.14919 | 0.00226 | 0.02251 | 0.00016 | 104     | 22      | 141  | 2   | 143  | 1.0 | 1.0  |      |     |     |     |
| SH10-27-27                                      | 3009 | 3016 | 1    | 0.05148 | 0.00146 | 0.16085 | 0.00429 | 0.02266 | 0.00020 | 262     | 45      | 151  | 4   | 144  | 1.0 | 1.0  |      |     |     |     |
| SH10-27-28                                      | 1244 | 2053 | 0.61 | 0.04791 | 0.00107 | 0.14875 | 0.00306 | 0.02252 | 0.00017 | 95      | 34      | 141  | 3   | 144  | 1.0 | 1.0  |      |     |     |     |
| M18, Xiangshan, Le'an (Yang et al., 2010, 2013) |      |      |      |         |         |         |         |         |         |         |         |      |     |      |     |      |      |     |     |     |
| XS-30-1-01                                      | 95   | 182  | 0.52 | 0.11010 | 0.03080 | 0.36000 | 0.09950 | 0.02371 | 0.00100 | 0.00686 | 0.00054 | 1801 | 606 | 312  | 74  | 151  | 6.0  | 138 | 11  | 0.5 |
| XS-30-1-02                                      | 228  | 231  | 0.99 | 0.05940 | 0.00390 | 0.16050 | 0.01020 | 0.01961 | 0.00042 | 0.00661 | 0.00070 | 581  | 100 | 151  | 9   | 125  | 3.0  | 133 | 14  | 0.8 |
| XS-30-1-03                                      | 62   | 71   | 0.88 | 0.04950 | 0.00990 | 0.14220 | 0.02820 | 0.02085 | 0.00069 | 0.00761 | 0.00106 | 171  | 320 | 135  | 25  | 133  | 4.0  | 153 | 21  | 1.0 |
| XS-30-1-04                                      | 236  | 286  | 0.82 | 0.05060 | 0.00310 | 0.14040 | 0.00840 | 0.02013 | 0.00039 | 0.00664 | 0.00069 | 222  | 102 | 133  | 7   | 128  | 2.0  | 134 | 14  | 1.0 |
| XS-30-1-05                                      | 309  | 390  | 0.79 | 0.04930 | 0.00240 | 0.13860 | 0.00670 | 0.02041 | 0.00037 | 0.00665 | 0.00063 | 161  | 79  | 132  | 6   | 130  | 2.0  | 134 | 13  | 1.0 |
| XS-30-1-06                                      | 155  | 414  | 0.37 | 0.04930 | 0.00250 | 0.14190 | 0.00710 | 0.02089 | 0.00039 | 0.00710 | 0.00067 | 161  | 81  | 135  | 6   | 133  | 2.0  | 143 | 13  | 1.0 |
| XS-30-1-07                                      | 506  | 1204 | 0.42 | 0.04760 | 0.00140 | 0.14400 | 0.00430 | 0.02195 | 0.00036 | 0.00497 | 0.00031 | 79   | 41  | 137  | 4   | 140  | 2.0  | 100 | 6   | 1.0 |
| XS-30-1-08                                      | 548  | 2049 | 0.27 | 0.05000 | 0.00100 | 0.14550 | 0.00310 | 0.02111 | 0.00032 | 0.00679 | 0.00050 | 195  | 24  | 138  | 3   | 135  | 2.0  | 137 | 10  | 1.0 |
| XS-30-1-09                                      | 262  | 699  | 0.38 | 0.05140 | 0.00150 | 0.15260 | 0.00460 | 0.02155 | 0.00035 | 0.00649 | 0.00045 | 257  | 40  | 144  | 4   | 137  | 2.0  | 131 | 9   | 1.0 |
| XS-30-1-10                                      | 687  | 1534 | 0.45 | 0.04980 | 0.00120 | 0.15120 | 0.00370 | 0.02204 | 0.00034 | 0.00636 | 0.00043 | 184  | 30  | 143  | 3   | 141  | 2.0  | 128 | 9   | 1.0 |
| XS-30-1-11                                      | 224  | 609  | 0.37 | 0.05090 | 0.00170 | 0.14660 | 0.00500 | 0.02092 | 0.00034 | 0.00712 | 0.00061 | 234  | 49  | 139  | 4   | 133  | 2.0  | 143 | 12  | 1.0 |
| XS-30-1-12                                      | 266  | 483  | 0.55 | 0.05250 | 0.00180 | 0.15530 | 0.00540 | 0.02146 | 0.00035 | 0.00629 | 0.00066 | 307  | 49  | 147  | 5   | 137  | 2.0  | 127 | 13  | 0.9 |
| XS-30-1-13                                      | 586  | 1967 | 0.30 | 0.04940 | 0.00120 | 0.14800 | 0.00370 | 0.02172 | 0.00034 | 0.00691 | 0.00080 | 168  | 31  | 140  | 3   | 139  | 2.0  | 139 | 16  | 1.0 |
| XS-30-1-14                                      | 460  | 377  | 1.22 | 0.04890 | 0.00210 | 0.14330 | 0.00610 | 0.02126 | 0.00036 | 0.00636 | 0.00068 | 143  | 68  | 136  | 5   | 136  | 2.0  | 128 | 14  | 1.0 |
| XS-30-1-15                                      | 234  | 223  | 1.05 | 0.05040 | 0.00330 | 0.14230 | 0.00920 | 0.02047 | 0.00039 | 0.00725 | 0.00097 | 213  | 113 | 135  | 8   | 131  | 2.0  | 146 | 19  | 1.0 |
| XS-30-1-16                                      | 262  | 260  | 1.01 | 0.04960 | 0.00290 | 0.14390 | 0.00850 | 0.02105 | 0.00040 | 0.00657 | 0.00080 | 176  | 100 | 136  | 8   | 134  | 3.0  | 132 | 16  | 1.0 |
| XS-30-1-17                                      | 7    | 238  | 0.03 | 0.12120 | 0.00230 | 4.63980 | 0.09630 | 0.27773 | 0.00415 | 0.02414 | 0.00726 | 1974 | 18  | 1756 | 17  | 4580 | 21.0 | 482 | 443 | 0.9 |
| XS-30-1-18                                      | 216  | 684  | 0.32 | 0.04980 | 0.00150 | 0.14640 | 0.00440 | 0.02134 | 0.00033 | 0.00773 | 0.00128 | 185  | 42  | 139  | 4   | 136  | 2.0  | 156 | 26  | 1.0 |
| XS-30-1-19                                      | 74   | 107  | 0.70 | 0.04980 | 0.00640 | 0.14300 | 0.01810 | 0.02083 | 0.00054 | 0.00894 | 0.00227 | 186  | 233 | 136  | 16  | 133  | 3.0  | 180 | 45  | 1.0 |
| XS-30-1-20                                      | 137  | 277  | 0.50 | 0.04910 | 0.00260 | 0.14520 | 0.00770 | 0.02145 | 0.00038 | 0.00639 | 0.00088 | 153  | 88  | 138  | 7   | 137  | 2.0  | 129 | 18  | 1.0 |
| XS-30-1-21                                      |      |      |      |         |         |         |         |         |         |         |         |      |     |      |     |      |      |     |     |     |



|          |      |      |      |         |         |         |         |         |         |         |         |     |    |     |     |     |
|----------|------|------|------|---------|---------|---------|---------|---------|---------|---------|---------|-----|----|-----|-----|-----|
| RYT03-01 | 219  | 857  | 0.26 | 0.04871 | 0.00136 | 0.14525 | 0.00403 | 0.02175 | 0.00027 | 0.00689 | 0.00023 | 138 | 4  | 139 | 2.0 | 1.0 |
| RYT03-02 | 298  | 1247 | 0.24 | 0.04624 | 0.00094 | 0.13675 | 0.00279 | 0.02139 | 0.00015 | 0.00685 | 0.00015 | 130 | 2  | 136 | 1.0 | 1.0 |
| RYT03-06 | 512  | 1613 | 0.32 | 0.04737 | 0.00119 | 0.14154 | 0.00361 | 0.02161 | 0.00024 | 0.00665 | 0.00021 | 134 | 3  | 138 | 1.0 | 1.0 |
| RYT03-07 | 921  | 4146 | 0.22 | 0.04789 | 0.00110 | 0.14240 | 0.00311 | 0.02152 | 0.00021 | 0.00733 | 0.00023 | 135 | 3  | 137 | 1.0 | 1.0 |
| RYT03-09 | 723  | 3609 | 0.20 | 0.05317 | 0.00068 | 0.15841 | 0.00199 | 0.02145 | 0.00012 | 0.00756 | 0.00013 | 149 | 2  | 137 | 1.0 | 0.9 |
| RYT03-10 | 356  | 2007 | 0.18 | 0.05038 | 0.00133 | 0.15021 | 0.00375 | 0.02151 | 0.00023 | 0.00652 | 0.00024 | 142 | 3  | 137 | 1.0 | 1.0 |
| RYT03-11 | 288  | 427  | 0.67 | 0.04976 | 0.00130 | 0.15090 | 0.00375 | 0.02202 | 0.00018 | 0.00725 | 0.00015 | 143 | 3  | 140 | 1.0 | 1.0 |
| RYT03-16 | 518  | 2409 | 0.21 | 0.04846 | 0.00113 | 0.14305 | 0.00332 | 0.02129 | 0.00019 | 0.00722 | 0.00022 | 136 | 3  | 136 | 1.0 | 1.0 |
| RYT03-17 | 192  | 718  | 0.27 | 0.05013 | 0.00115 | 0.15019 | 0.00332 | 0.02170 | 0.00018 | 0.00705 | 0.00019 | 142 | 3  | 138 | 1.0 | 1.0 |
| RYT03-19 | 172  | 552  | 0.31 | 0.05081 | 0.00117 | 0.15250 | 0.00334 | 0.02180 | 0.00018 | 0.00753 | 0.00020 | 144 | 3  | 139 | 1.0 | 1.0 |
| RYT03-22 | 664  | 4244 | 0.16 | 0.04916 | 0.00123 | 0.14424 | 0.00356 | 0.02116 | 0.00026 | 0.00673 | 0.00023 | 137 | 3  | 135 | 2.0 | 1.0 |
| RYT03-24 | 276  | 999  | 0.28 | 0.04968 | 0.00105 | 0.14647 | 0.00292 | 0.02141 | 0.00018 | 0.00727 | 0.00016 | 139 | 3  | 137 | 1.0 | 1.0 |
| RYT03-25 | 311  | 1396 | 0.22 | 0.04843 | 0.00135 | 0.14314 | 0.00394 | 0.02142 | 0.00025 | 0.00692 | 0.00023 | 136 | 4  | 137 | 2.0 | 1.0 |
| RYT03-26 | 520  | 2169 | 0.24 | 0.04910 | 0.00169 | 0.14216 | 0.00531 | 0.02085 | 0.00027 | 0.00685 | 0.00036 | 135 | 5  | 133 | 2.0 | 1.0 |
| RYT03-28 | 703  | 2793 | 0.25 | 0.04888 | 0.00064 | 0.14672 | 0.00205 | 0.02164 | 0.00015 | 0.00719 | 0.00013 | 139 | 2  | 138 | 1.0 | 1.0 |
| RYT04-01 | 122  | 428  | 0.29 | 0.04994 | 0.00231 | 0.14671 | 0.00648 | 0.02152 | 0.00029 | 0.00670 | 0.00032 | 139 | 6  | 137 | 2.0 | 1.0 |
| RYT04-02 | 111  | 199  | 0.56 | 0.04975 | 0.00213 | 0.14395 | 0.00597 | 0.02107 | 0.00032 | 0.00642 | 0.00028 | 137 | 5  | 134 | 2.0 | 1.0 |
| RYT04-04 | 160  | 470  | 0.34 | 0.04610 | 0.00185 | 0.13399 | 0.00525 | 0.02113 | 0.00028 | 0.00621 | 0.00024 | 128 | 5  | 135 | 2.0 | 1.1 |
| RYT04-05 | 203  | 682  | 0.30 | 0.04843 | 0.00137 | 0.14543 | 0.00473 | 0.02164 | 0.00026 | 0.00751 | 0.00024 | 138 | 4  | 138 | 2.0 | 1.0 |
| RYT04-06 | 541  | 2532 | 0.21 | 0.04946 | 0.00064 | 0.14577 | 0.00191 | 0.02131 | 0.00016 | 0.00711 | 0.00012 | 138 | 2  | 136 | 1.0 | 1.0 |
| RYT04-07 | 223  | 1137 | 0.20 | 0.04786 | 0.00096 | 0.13738 | 0.00277 | 0.02073 | 0.00021 | 0.00678 | 0.00018 | 131 | 2  | 132 | 1.0 | 1.0 |
| RYT04-08 | 72   | 163  | 0.44 | 0.04884 | 0.00310 | 0.14331 | 0.00868 | 0.02136 | 0.00046 | 0.00721 | 0.00052 | 136 | 8  | 136 | 3.0 | 1.0 |
| RYT04-09 | 324  | 364  | 0.89 | 0.04886 | 0.00152 | 0.13762 | 0.00423 | 0.02041 | 0.00023 | 0.00639 | 0.00014 | 131 | 4  | 130 | 1.0 | 1.0 |
| RYT04-10 | 89   | 206  | 0.43 | 0.04950 | 0.00162 | 0.14438 | 0.00469 | 0.02120 | 0.00026 | 0.00664 | 0.00020 | 137 | 4  | 135 | 2.0 | 1.0 |
| RYT04-11 | 163  | 813  | 0.20 | 0.04844 | 0.00104 | 0.13777 | 0.00299 | 0.02053 | 0.00019 | 0.00708 | 0.00022 | 131 | 3  | 131 | 1.0 | 1.0 |
| RYT04-12 | 809  | 2968 | 0.27 | 0.04925 | 0.00063 | 0.15274 | 0.00206 | 0.02227 | 0.00015 | 0.00716 | 0.00012 | 144 | 2  | 142 | 1.0 | 1.0 |
| RYT04-13 | 334  | 1100 | 0.30 | 0.04721 | 0.00084 | 0.14651 | 0.00259 | 0.02235 | 0.00017 | 0.00673 | 0.00014 | 139 | 2  | 142 | 1.0 | 1.0 |
| RYT04-14 | 233  | 1279 | 0.18 | 0.05031 | 0.00132 | 0.15062 | 0.00402 | 0.02173 | 0.00023 | 0.00773 | 0.00029 | 142 | 4  | 139 | 1.0 | 1.0 |
| RYT04-16 | 216  | 1014 | 0.21 | 0.04681 | 0.00188 | 0.14057 | 0.00581 | 0.02174 | 0.00030 | 0.00779 | 0.00032 | 134 | 5  | 139 | 2.0 | 1.0 |
| RYT05-01 | 196  | 1247 | 0.16 | 0.04653 | 0.00097 | 0.13786 | 0.00284 | 0.02122 | 0.00019 | 0.00670 | 0.00020 | 131 | 3  | 135 | 1.0 | 1.0 |
| RYT05-02 | 1625 | 7044 | 0.23 | 0.04736 | 0.00064 | 0.14129 | 0.00200 | 0.02139 | 0.00017 | 0.00670 | 0.00012 | 134 | 2  | 136 | 1.0 | 1.0 |
| RYT05-03 | 965  | 5928 | 0.16 | 0.04535 | 0.00083 | 0.13317 | 0.00266 | 0.02113 | 0.00025 | 0.00618 | 0.00016 | 127 | 2  | 135 | 2.0 | 1.1 |
| RYT05-04 | 215  | 897  | 0.24 | 0.04749 | 0.00139 | 0.14185 | 0.00385 | 0.02166 | 0.00023 | 0.00643 | 0.00021 | 135 | 3  | 138 | 1.0 | 1.0 |
| RYT05-05 | 319  | 1723 | 0.19 | 0.04571 | 0.00101 | 0.13831 | 0.00319 | 0.02164 | 0.00020 | 0.00657 | 0.00022 | 132 | 3  | 138 | 1.0 | 1.0 |
| RYT05-06 | 328  | 1757 | 0.19 | 0.04864 | 0.00090 | 0.13941 | 0.00258 | 0.02068 | 0.00018 | 0.00658 | 0.00015 | 133 | 2  | 132 | 1.0 | 1.0 |
| RYT05-08 | 333  | 841  | 0.40 | 0.04630 | 0.00125 | 0.14531 | 0.00383 | 0.02245 | 0.00025 | 0.00661 | 0.00018 | 138 | 3  | 143 | 2.0 | 1.0 |
| RYT05-09 | 165  | 581  | 0.28 | 0.04933 | 0.00170 | 0.14986 | 0.00502 | 0.02200 | 0.00032 | 0.00635 | 0.00029 | 142 | 4  | 140 | 2.0 | 1.0 |
| RYT05-11 | 114  | 454  | 0.25 | 0.05389 | 0.00261 | 0.15604 | 0.00749 | 0.02085 | 0.00039 | 0.00750 | 0.00044 | 147 | 7  | 133 | 2.0 | 0.9 |
| RYT05-12 | 325  | 1463 | 0.22 | 0.04838 | 0.00128 | 0.14541 | 0.00255 | 0.02205 | 0.00020 | 0.00711 | 0.00016 | 138 | 2  | 141 | 1.0 | 1.0 |
| RYT05-13 | 364  | 1637 | 0.22 | 0.04652 | 0.00080 | 0.13967 | 0.00250 | 0.02147 | 0.00023 | 0.00665 | 0.00016 | 133 | 2  | 137 | 1.0 | 1.0 |
| RYT05-14 | 239  | 964  | 0.25 | 0.04689 | 0.00109 | 0.13712 | 0.00322 | 0.02110 | 0.00025 | 0.00676 | 0.00020 | 130 | 3  | 135 | 2.0 | 1.0 |
| RYT05-15 | 618  | 3402 | 0.18 | 0.04865 | 0.00120 | 0.14253 | 0.00335 | 0.02101 | 0.00027 | 0.00681 | 0.00020 | 135 | 3  | 134 | 2.0 | 1.0 |
| RYT05-17 | 1270 | 4183 | 0.30 | 0.04687 | 0.00080 | 0.13622 | 0.00236 | 0.02088 | 0.00018 | 0.00678 | 0.00015 | 130 | 2  | 133 | 1.0 | 1.0 |
| RYT05-18 | 271  | 763  | 0.36 | 0.04684 | 0.00146 | 0.14017 | 0.00441 | 0.02156 | 0.00026 | 0.00662 | 0.00022 | 133 | 4  | 138 | 2.0 | 1.0 |
| RYT05-19 | 209  | 411  | 0.51 | 0.05047 | 0.00162 | 0.14422 | 0.00470 | 0.02072 | 0.00029 | 0.00672 | 0.00022 | 137 | 4  | 132 | 2.0 | 1.0 |
| RYT05-21 | 39   | 80   | 0.50 | 0.05284 | 0.00387 | 0.15421 | 0.00997 | 0.02165 | 0.00044 | 0.00677 | 0.00041 | 146 | 9  | 138 | 3.0 | 0.9 |
| RYT05-22 | 71   | 114  | 0.62 | 0.05226 | 0.00232 | 0.15142 | 0.00672 | 0.02104 | 0.00034 | 0.00686 | 0.00025 | 143 | 6  | 134 | 2.0 | 0.9 |
| RYT05-24 | 71   | 163  | 0.43 | 0.04785 | 0.00312 | 0.14435 | 0.00921 | 0.02184 | 0.00054 | 0.00649 | 0.00037 | 137 | 8  | 139 | 3.0 | 1.0 |
| RYT05-25 | 134  | 199  | 0.67 | 0.05085 | 0.00163 | 0.15457 | 0.00460 | 0.02240 | 0.00028 | 0.00662 | 0.00016 | 146 | 4  | 143 | 2.0 | 1.0 |
| RYT06-01 | 109  | 134  | 0.81 | 0.05269 | 0.00217 | 0.15492 | 0.00629 | 0.02148 | 0.00026 | 0.00710 | 0.00021 | 146 | 6  | 137 | 2.0 | 0.9 |
| RYT06-03 | 321  | 402  | 0.80 | 0.05089 | 0.00171 | 0.14975 | 0.00523 | 0.02117 | 0.00026 | 0.00636 | 0.00020 | 142 | 5  | 135 | 2.0 | 1.0 |
| RYT06-04 | 181  | 272  | 0.66 | 0.05324 | 0.00219 | 0.15468 | 0.00617 | 0.02109 | 0.00030 | 0.00714 | 0.00024 | 146 | 5  | 135 | 2.0 | 0.9 |
| RYT06-05 | 161  | 633  | 0.25 | 0.04839 | 0.00210 | 0.14158 | 0.00616 | 0.02121 | 0.00037 | 0.00740 | 0.00033 | 134 | 5  | 135 | 2.0 | 1.0 |
| RYT06-06 | 85   | 134  | 0.63 | 0.05404 | 0.00186 | 0.16027 | 0.00509 | 0.02177 | 0.00024 | 0.00709 | 0.00022 | 151 | 4  | 139 | 2.0 | 0.9 |
| RYT06-10 | 111  | 134  | 0.83 | 0.04798 | 0.00377 | 0.14239 | 0.01189 | 0.02124 | 0.00054 | 0.00648 | 0.00037 | 135 | 11 | 136 | 3.0 | 1.0 |
| RYT06-14 | 148  | 340  | 0.43 | 0.05395 | 0.00186 | 0.16080 | 0.00538 | 0.02166 | 0.00028 | 0.00718 | 0.00023 | 151 | 5  | 138 | 2.0 | 0.9 |
| RYT06-16 | 224  | 717  | 0.31 | 0.04589 | 0.00269 | 0.13816 | 0.00774 | 0.02193 | 0.00042 | 0.00708 | 0.00041 | 131 | 7  | 140 | 3.0 | 1.1 |
| RYT06-17 | 805  | 3488 | 0.23 | 0.04898 | 0.00076 | 0.13983 | 0.00235 | 0.02053 | 0.00016 | 0.00657 | 0.00014 | 133 | 2  | 131 | 1.0 | 1.0 |
| RYT06-18 | 234  | 922  | 0.25 | 0.04768 | 0.00092 | 0.14426 | 0.00282 | 0.02181 | 0.00017 | 0.00686 | 0.00016 | 137 | 2  | 139 | 1.0 | 1.0 |
| RYT06-19 | 366  | 1574 | 0.23 | 0.04899 | 0.00095 | 0.14053 | 0.00272 | 0.02070 | 0.00017 | 0.00684 | 0.00016 | 134 | 2  | 132 | 1.0 | 1.0 |
| RYT06-20 | 588  | 1516 | 0.39 | 0.04822 | 0.00093 | 0.13686 | 0.00270 | 0.02047 | 0.00017 | 0.00655 | 0.00014 | 130 | 2  | 131 | 1.0 | 1.0 |
| RYT06-21 | 247  | 543  | 0.46 | 0.04830 | 0.00250 | 0.14105 | 0.00681 | 0.02130 | 0.00034 | 0.00605 | 0.00028 | 134 | 6  | 136 | 2.0 | 1.0 |
| RYT06-23 | 256  | 1146 | 0.22 | 0.04649 | 0.00112 | 0.14181 | 0.00344 | 0.02194 | 0.00021 | 0.00752 | 0.00023 | 135 | 3  | 140 | 1.0 | 1.0 |
| RYT06-24 | 172  | 773  | 0.22 | 0.04837 | 0.00151 | 0.14293 | 0.00461 | 0.02120 | 0.00023 | 0.00724 | 0.00029 | 136 | 4  | 135 | 1.0 | 1.0 |
| RYT07-01 | 1054 | 3223 | 0.33 | 0.05861 | 0.00104 | 0.16576 | 0.00301 | 0.02028 | 0.00018 | 0.00770 | 0.00016 | 156 | 3  | 129 | 1.0 | 0.8 |
| RYT07-02 | 831  | 3304 | 0.25 | 0.05267 | 0.00093 | 0.15597 | 0.00299 | 0.02118 | 0.00017 | 0.00722 | 0.00016 | 147 | 3  | 135 | 1.0 | 0.9 |
| RYT07-04 | 282  | 1165 | 0.24 | 0.05206 | 0.00121 | 0.15660 | 0.00348 | 0.02195 | 0.00029 | 0.00839 | 0.00023 | 148 | 3  | 140 | 2.0 | 0.9 |
| RYT07-06 | 1147 | 3816 | 0.30 | 0.05146 | 0.00085 | 0.14997 | 0.00272 | 0.02089 | 0.00019 | 0.00612 | 0.00012 | 142 | 2  | 133 | 1.0 | 0.9 |
| RYT07-07 | 445  | 1575 | 0.28 | 0.05043 | 0.00106 | 0.14665 | 0.00297 | 0.02104 | 0.00022 | 0.00704 | 0.00017 | 139 | 3  | 134 | 1.0 | 1.0 |
| RYT07-09 | 2163 | 7909 | 0.27 | 0.05032 | 0.00078 | 0.14554 | 0.00235 | 0.02078 | 0.00019 | 0.00698 | 0.00015 | 138 | 2  | 133 | 1.0 | 1.0 |
|          |      |      |      |         |         |         |         |         |         |         |         |     |    |     |     |     |



|             |      |      |      |         |         |         |         |         |         |         |         |  |  |  |  |  |      |      |       |     |       |     |
|-------------|------|------|------|---------|---------|---------|---------|---------|---------|---------|---------|--|--|--|--|--|------|------|-------|-----|-------|-----|
| RYT07-22    | 199  | 528  | 0.38 | 0.05564 | 0.00168 | 0.16799 | 0.00486 | 0.02197 | 0.00026 | 0.00734 | 0.00023 |  |  |  |  |  | 158  | 4    | 140   | 2.0 |       | 0.9 |
| RYT07-25    | 280  | 536  | 0.52 | 0.06222 | 0.00210 | 0.18629 | 0.00617 | 0.02219 | 0.00044 | 0.00812 | 0.00028 |  |  |  |  |  | 173  | 5    | 142   | 3.0 |       | 0.8 |
| RYT07-26    | 177  | 350  | 0.50 | 0.05240 | 0.00159 | 0.15947 | 0.00479 | 0.02209 | 0.00025 | 0.00728 | 0.00020 |  |  |  |  |  | 150  | 4    | 141   | 2.0 |       | 0.9 |
| RYT07-27    | 149  | 373  | 0.40 | 0.05006 | 0.00254 | 0.14637 | 0.00725 | 0.02113 | 0.00038 | 0.00671 | 0.00035 |  |  |  |  |  | 139  | 6    | 135   | 2.0 |       | 1.0 |
| RYT07-28    | 122  | 380  | 0.32 | 0.05139 | 0.00125 | 0.16006 | 0.00388 | 0.02270 | 0.00027 | 0.00751 | 0.00020 |  |  |  |  |  | 151  | 3    | 145   | 2.0 |       | 1.0 |
| RYT07-29    | 182  | 700  | 0.26 | 0.05653 | 0.00149 | 0.17522 | 0.00478 | 0.02238 | 0.00036 | 0.00882 | 0.00031 |  |  |  |  |  | 164  | 4    | 143   | 2.0 |       | 0.9 |
| RYT07-30    | 163  | 317  | 0.52 | 0.06022 | 0.00159 | 0.17887 | 0.00449 | 0.02164 | 0.00023 | 0.00757 | 0.00018 |  |  |  |  |  | 167  | 4    | 138   | 1.0 |       | 0.8 |
| RYT07-32    | 127  | 298  | 0.43 | 0.05829 | 0.00209 | 0.17220 | 0.00635 | 0.02134 | 0.00034 | 0.00836 | 0.00030 |  |  |  |  |  | 161  | 6    | 136   | 2.0 |       | 0.8 |
|             |      |      |      |         |         |         |         |         |         |         |         |  |  |  |  |  |      |      |       |     |       |     |
| D0026-3@1   | 252  | 187  | 1.35 |         |         | 0.14093 | 0.01125 | 0.021   | 0.00055 |         |         |  |  |  |  |  | 136  | 182  | 133.9 | 10  | 133.8 | 3.5 |
| D0026-3@2   | 353  | 302  | 1.17 |         |         | 0.14151 | 0.00766 | 0.021   | 0.00046 |         |         |  |  |  |  |  | 137  | 125  | 134.4 | 6.8 | 134.2 | 2.9 |
| D0026-3@3   | 187  | 187  | 1.00 |         |         | 0.1431  | 0.00874 | 0.0223  | 0.00044 |         |         |  |  |  |  |  | 27.8 | 142  | 135.8 | 7.8 | 142.2 | 2.8 |
| D0026-3@4   | 81   | 73   | 1.11 |         |         | 0.14647 | 0.0189  | 0.0219  | 0.00063 |         |         |  |  |  |  |  | 133  | 282  | 138.8 | 17  | 139.3 | 4   |
| D0026-3@5   | 297  | 266  | 1.12 |         |         | 0.14129 | 0.01148 | 0.0208  | 0.00057 |         |         |  |  |  |  |  | 158  | 185  | 134.2 | 10  | 132.8 | 3.6 |
| D0026-3@6   | 275  | 661  | 0.42 |         |         | 0.19841 | 0.00664 | 0.0218  | 0.00038 |         |         |  |  |  |  |  | 812  | 69   | 183.8 | 5.6 | 138.9 | 2.4 |
| D0026-3@7   | 384  | 890  | 0.43 |         |         | 0.14786 | 0.00545 | 0.0219  | 0.00039 |         |         |  |  |  |  |  | 147  | 85.1 | 140   | 4.8 | 139.9 | 2.4 |
| D0026-3@8   | 140  | 162  | 0.86 |         |         | 0.57613 | 0.01586 | 0.0744  | 0.00123 |         |         |  |  |  |  |  | 461  | 59.3 | 462   | 10  | 462.3 | 7.4 |
| D0026-3@9   | 145  | 449  | 0.32 |         |         | 0.54667 | 0.01238 | 0.0712  | 0.0011  |         |         |  |  |  |  |  | 442  | 46.4 | 442.8 | 8.1 | 443.1 | 6.6 |
| D0026-3@10  | 767  | 613  | 1.25 |         |         | 0.1429  | 0.00443 | 0.0202  | 0.00034 |         |         |  |  |  |  |  | 257  | 69.1 | 135.6 | 3.9 | 128.8 | 2.2 |
| D0026-3@11  | 185  | 307  | 0.60 |         |         | 0.14457 | 0.00811 | 0.0219  | 0.00045 |         |         |  |  |  |  |  | 97.3 | 132  | 137.1 | 7.2 | 139.6 | 2.9 |
| D0026-3@12  | 524  | 534  | 0.98 |         |         | 0.13919 | 0.00681 | 0.0208  | 0.00044 |         |         |  |  |  |  |  | 126  | 114  | 132.3 | 6.1 | 132.7 | 2.8 |
| D0026-3@13  | 289  | 243  | 1.19 |         |         | 0.1295  | 0.01129 | 0.0194  | 0.00059 |         |         |  |  |  |  |  | 115  | 200  | 123.7 | 10  | 124.1 | 3.7 |
| D0026-3@14  | 139  | 131  | 1.06 |         |         | 0.31219 | 0.01865 | 0.021   | 0.00057 |         |         |  |  |  |  |  | 1765 | 111  | 275.9 | 14  | 133.8 | 3.6 |
| D0026-3@15  | 131  | 305  | 0.43 |         |         | 0.56877 | 0.01323 | 0.0735  | 0.00116 |         |         |  |  |  |  |  | 457  | 48.4 | 457.2 | 8.6 | 457.3 | 7   |
| D0026-3@16  | 465  | 349  | 1.33 |         |         | 0.15159 | 0.00708 | 0.0213  | 0.00041 |         |         |  |  |  |  |  | 265  | 105  | 143.3 | 6.2 | 136.1 | 2.6 |
| D0026-3@17  | 468  | 343  | 1.36 |         |         | 0.131   | 0.00955 | 0.0194  | 0.00052 |         |         |  |  |  |  |  | 146  | 168  | 125   | 8.6 | 123.9 | 3.3 |
| D0026-3@18  | 436  | 444  | 0.98 |         |         | 0.14885 | 0.00936 | 0.0204  | 0.00049 |         |         |  |  |  |  |  | 329  | 140  | 140.9 | 8.3 | 130   | 3.1 |
| D0026-3@19  | 482  | 692  | 0.70 |         |         | 0.13154 | 0.00484 | 0.019   | 0.00036 |         |         |  |  |  |  |  | 212  | 83.6 | 125.5 | 4.3 | 121   | 2.3 |
| D0026-3@20  | 475  | 828  | 0.57 |         |         | 0.1413  | 0.00854 | 0.0208  | 0.00037 |         |         |  |  |  |  |  | 162  | 136  | 134.2 | 7.6 | 132.6 | 2.3 |
| D0026-3@21  | 589  | 635  | 0.93 |         |         | 0.1454  | 0.00748 | 0.0214  | 0.00036 |         |         |  |  |  |  |  | 160  | 115  | 137.8 | 6.6 | 136.5 | 2.3 |
| D0026-3@22  | 375  | 668  | 0.56 |         |         | 0.14919 | 0.00776 | 0.0218  | 0.00039 |         |         |  |  |  |  |  | 183  | 116  | 141.2 | 6.9 | 138.7 | 2.4 |
| D0026-3@23  | 749  | 1091 | 0.69 |         |         | 0.15502 | 0.01081 | 0.0227  | 0.00051 |         |         |  |  |  |  |  | 166  | 157  | 146.3 | 9.5 | 144.9 | 3.2 |
| D0026-3@24  | 201  | 319  | 0.63 |         |         | 0.15331 | 0.0142  | 0.0227  | 0.00045 |         |         |  |  |  |  |  | 145  | 204  | 144.8 | 13  | 144.9 | 2.9 |
| D0026-3@25  | 779  | 1603 | 0.49 |         |         | 0.15241 | 0.00568 | 0.022   | 0.0004  |         |         |  |  |  |  |  | 212  | 82.5 | 144   | 5   | 139.9 | 2.5 |
| D0026-3@26  | 325  | 267  | 1.22 |         |         | 0.15222 | 0.01751 | 0.0223  | 0.00049 |         |         |  |  |  |  |  | 176  | 249  | 143.9 | 15  | 141.9 | 3.1 |
| D0026-3@27  | 934  | 1432 | 0.65 |         |         | 0.15742 | 0.01114 | 0.0221  | 0.00048 |         |         |  |  |  |  |  | 272  | 156  | 148.4 | 9.8 | 141   | 3.1 |
| D0026-3@28  | 370  | 229  | 1.62 |         |         | 0.15163 | 0.02711 | 0.0226  | 0.00062 |         |         |  |  |  |  |  | 135  | 376  | 143.3 | 24  | 143.8 | 3.9 |
| D0026-3@29  | 303  | 568  | 0.53 |         |         | 0.15045 | 0.0199  | 0.0214  | 0.0008  |         |         |  |  |  |  |  | 242  | 285  | 142.3 | 18  | 136.5 | 5.1 |
| D0026-3@30  | 521  | 594  | 0.88 |         |         | 0.14567 | 0.01537 | 0.0211  | 0.00064 |         |         |  |  |  |  |  | 202  | 233  | 138.1 | 14  | 134.6 | 4   |
| D0026-3@31  | 128  | 123  | 1.04 |         |         | 0.15008 | 0.05802 | 0.0225  | 0.00091 |         |         |  |  |  |  |  | 112  | 726  | 142   | 51  | 143.7 | 5.7 |
| D0026-3@32  | 161  | 159  | 1.01 |         |         | 0.15455 | 0.03504 | 0.0227  | 0.0007  |         |         |  |  |  |  |  | 161  | 461  | 145.9 | 31  | 144.9 | 4.4 |
| D0026-3@33  | 282  | 208  | 1.36 |         |         | 0.15066 | 0.03392 | 0.0221  | 0.00067 |         |         |  |  |  |  |  | 169  | 457  | 142.5 | 30  | 140.7 | 4.2 |
|             |      |      |      |         |         |         |         |         |         |         |         |  |  |  |  |  |      |      |       |     |       |     |
| D0839-13@1  | 912  | 1525 | 0.60 |         |         | 0.14125 | 0.004   | 0.021   | 0.00036 |         |         |  |  |  |  |  | 134  | 63.6 | 134.2 | 3.6 | 134.2 | 2.3 |
| D0839-13@2  | 641  | 724  | 0.89 |         |         | 0.14672 | 0.00386 | 0.0218  | 0.00035 |         |         |  |  |  |  |  | 140  | 57.8 | 139   | 3.4 | 138.9 | 2.2 |
| D0839-13@3  | 1868 | 1874 | 1.00 |         |         | 0.15203 | 0.0033  | 0.0225  | 0.00034 |         |         |  |  |  |  |  | 145  | 45.9 | 143.7 | 2.9 | 143.7 | 2.2 |
| D0839-13@4  | 1257 | 945  | 1.33 |         |         | 0.14836 | 0.00409 | 0.0223  | 0.00036 |         |         |  |  |  |  |  | 112  | 61.7 | 140.5 | 3.6 | 142.1 | 2.3 |
| D0839-13@5  | 834  | 797  | 1.05 |         |         | 0.14106 | 0.00371 | 0.021   | 0.00034 |         |         |  |  |  |  |  | 133  | 57.9 | 134   | 3.3 | 134.1 | 2.1 |
| D0839-13@6  | 1310 | 1042 | 1.26 |         |         | 0.14724 | 0.00374 | 0.0223  | 0.00035 |         |         |  |  |  |  |  | 95.3 | 57.4 | 139.5 | 3.3 | 142   | 2.2 |
| D0839-13@7  | 1241 | 1767 | 0.70 |         |         | 0.14463 | 0.00337 | 0.0225  | 0.00034 |         |         |  |  |  |  |  | 34.3 | 50.8 | 137.2 | 3   | 143.2 | 2.2 |
| D0839-13@8  | 543  | 624  | 0.87 |         |         | 0.13903 | 0.00436 | 0.0218  | 0.00036 |         |         |  |  |  |  |  | 11   | 71.8 | 132.2 | 3.9 | 139   | 2.3 |
| D0839-13@9  | 587  | 925  | 0.63 |         |         | 0.14251 | 0.00378 | 0.0212  | 0.00034 |         |         |  |  |  |  |  | 135  | 58.8 | 135.3 | 3.4 | 135.3 | 2.2 |
| D0839-13@10 | 316  | 608  | 0.52 |         |         | 0.14192 | 0.00446 | 0.0211  | 0.00035 |         |         |  |  |  |  |  | 133  | 71.3 | 134.8 | 4   | 134.8 | 2.2 |
| D0839-13@11 | 1703 | 2084 | 0.82 |         |         | 0.14872 | 0.00326 | 0.0221  | 0.00034 |         |         |  |  |  |  |  | 140  | 47.1 | 140.8 | 2.9 | 140.8 | 2.2 |
| D0839-13@12 | 1767 | 1948 | 0.91 |         |         | 0.15539 | 0.00336 | 0.023   | 0.00035 |         |         |  |  |  |  |  | 147  | 46.1 | 146.7 | 3   | 146.6 | 2.2 |
| D0839-13@13 | 1344 | 1424 | 0.94 |         |         | 0.15152 | 0.00362 | 0.0225  | 0.00034 |         |         |  |  |  |  |  | 142  | 52.1 | 143.3 | 3.2 | 143.3 | 2.2 |
| D0839-13@14 | 3065 | 2567 | 1.19 |         |         | 0.16799 | 0.0035  | 0.0228  | 0.00034 |         |         |  |  |  |  |  |      |      |       |     |       |     |



|                           |                |                 |                 |                    |                    |                   |                    |                 |                 |                  |                |                  |                 |
|---------------------------|----------------|-----------------|-----------------|--------------------|--------------------|-------------------|--------------------|-----------------|-----------------|------------------|----------------|------------------|-----------------|
| D0001-1@22                | 371            | 240             | 1.55            | 0.1371             | 0.02181            | 0.0205            | 0.00056            | 123             | 339             | 130.5            | 20             | 130.9            | 3.5             |
| <del>D0001-1@23</del>     | <del>79</del>  | <del>190</del>  | <del>0.42</del> | <del>0.28022</del> | <del>0.02297</del> | <del>0.0394</del> | <del>0.00077</del> | <del>270</del>  | <del>178</del>  | <del>250.8</del> | <del>18</del>  | <del>248.8</del> | <del>4.8</del>  |
| D0001-1@24                | 221            | 153             | 1.44            | 0.1387             | 0.02264            | 0.0207            | 0.00047            | 131             | 345             | 131.9            | 20             | 132              | 3               |
| <del>D0001-1@25</del>     | <del>158</del> | <del>182</del>  | <del>0.87</del> | <del>0.51059</del> | <del>0.02655</del> | <del>0.0699</del> | <del>0.00118</del> | <del>328</del>  | <del>113</del>  | <del>418.8</del> | <del>18</del>  | <del>435.6</del> | <del>7.1</del>  |
| D0001-1@26                | 421            | 612             | 0.69            | 0.14459            | 0.01064            | 0.0216            | 0.00046            | 125             | 166             | 137.1            | 9.4            | 137.9            | 2.9             |
| D0001-1@27                | 612            | 479             | 1.28            | 0.15332            | 0.01039            | 0.0228            | 0.00042            | 135             | 152             | 144.8            | 9.2            | 145.5            | 2.7             |
| <del>D0001-1@28</del>     | <del>668</del> | <del>354</del>  | <del>1.89</del> | <del>1.38286</del> | <del>0.03172</del> | <del>0.1492</del> | <del>0.00221</del> | <del>845</del>  | <del>43.5</del> | <del>881.7</del> | <del>14</del>  | <del>896.7</del> | <del>2.4</del>  |
| D0001-1@29                | 400            | 291             | 1.37            | 0.14109            | 0.01391            | 0.0223            | 0.00042            | 0.1             | 214             | 134              | 12             | 142.3            | 2.7             |
| <del>D0001-1@30</del>     | <del>137</del> | <del>85</del>   | <del>1.61</del> | <del>1.3574</del>  | <del>0.05865</del> | <del>0.1447</del> | <del>0.00243</del> | <del>870</del>  | <del>86.2</del> | <del>870.7</del> | <del>25</del>  | <del>871.2</del> | <del>3.7</del>  |
| D0001-1@31                | 306            | 274             | 1.12            | 0.16378            | 0.01908            | 0.0243            | 0.00055            | 142             | 254             | 154              | 17             | 154.8            | 3.5             |
| <del>D0001-1@32</del>     | <del>129</del> | <del>507</del>  | <del>0.25</del> | <del>0.50015</del> | <del>0.01518</del> | <del>0.0657</del> | <del>0.00105</del> | <del>421</del>  | <del>62.9</del> | <del>411.8</del> | <del>10</del>  | <del>410.1</del> | <del>6.3</del>  |
| <del>D0001-1@33</del>     | <del>84</del>  | <del>65</del>   | <del>1.29</del> | <del>3.60841</del> | <del>0.1267</del>  | <del>0.2724</del> | <del>0.00496</del> | <del>1549</del> | <del>63.1</del> | <del>1551</del>  | <del>28</del>  | <del>1553</del>  | <del>25.1</del> |
| D0001-1@34                | 2132           | 1252            | 1.70            | 0.16426            | 0.0085             | 0.0241            | 0.0005             | 172             | 117             | 154.4            | 7.4            | 153.3            | 3.1             |
| <del>D0001-1@35</del>     | <del>396</del> | <del>485</del>  | <del>0.82</del> | <del>0.57783</del> | <del>0.01737</del> | <del>0.0746</del> | <del>0.00116</del> | <del>459</del>  | <del>63.1</del> | <del>463.1</del> | <del>11</del>  | <del>464</del>   | <del>7</del>    |
| D0001-1@36                | 1008           | 641             | 1.57            | 0.14683            | 0.00853            | 0.0227            | 0.00038            | 45.7            | 133             | 139.1            | 7.6            | 144.6            | 2.4             |
| <del>D0001-1@37</del>     | <del>202</del> | <del>707</del>  | <del>0.29</del> | <del>0.84542</del> | <del>0.02191</del> | <del>0.101</del>  | <del>0.00161</del> | <del>629</del>  | <del>51.2</del> | <del>622.1</del> | <del>12</del>  | <del>620.4</del> | <del>9.4</del>  |
| <del>D0001-1@38</del>     | <del>409</del> | <del>263</del>  | <del>1.56</del> | <del>1.24578</del> | <del>0.05859</del> | <del>0.1354</del> | <del>0.0027</del>  | <del>831</del>  | <del>95.4</del> | <del>821.5</del> | <del>27</del>  | <del>818.4</del> | <del>5.3</del>  |
| D0001-1@39                | 461            | 712             | 0.65            | 0.14889            | 0.00873            | 0.0217            | 0.00038            | 182             | 131             | 140.9            | 7.7            | 138.5            | 2.4             |
| D0001-1@40                | 440            | 393             | 1.12            | 0.15578            | 0.01347            | 0.0233            | 0.00043            | 126             | 192             | 147              | 12             | 148.3            | 2.7             |
| <del>D0001-1@41</del>     | <del>279</del> | <del>312</del>  | <del>0.89</del> | <del>0.57467</del> | <del>0.02513</del> | <del>0.0742</del> | <del>0.00127</del> | <del>459</del>  | <del>94.1</del> | <del>461</del>   | <del>16</del>  | <del>461.4</del> | <del>7.6</del>  |
|                           |                |                 |                 |                    |                    |                   |                    |                 |                 |                  |                |                  |                 |
| D0004-1@1                 | 168            | 150             | 1.12            | 0.1459             | 0.03254            | 0.0219            | 0.0006             | 120             | 457             | 138.3            | 29             | 139.4            | 3.8             |
| D0004-1@2                 | 849            | 539             | 1.58            | 0.14659            | 0.00866            | 0.0215            | 0.00036            | 167             | 132             | 138.9            | 7.7            | 137.3            | 2.3             |
| D0004-1@3                 | 5888           | 3449            | 1.71            | 0.15136            | 0.00476            | 0.0221            | 0.00033            | 183             | 70.7            | 143.1            | 4.2            | 140.8            | 2.1             |
| D0004-1@4                 | 1639           | 1256            | 1.30            | 0.14225            | 0.00493            | 0.0213            | 0.00033            | 125             | 77.9            | 135              | 4.4            | 135.7            | 2.1             |
| D0004-1@5                 | 1636           | 638             | 2.56            | 0.14732            | 0.0106             | 0.0217            | 0.00042            | 161             | 162             | 139.5            | 9.4            | 138.3            | 2.6             |
| D0004-1@6                 | 259            | 294             | 0.88            | 0.14615            | 0.01916            | 0.0215            | 0.0005             | 168             | 282             | 138.5            | 17             | 136.8            | 3.1             |
| D0004-1@7                 | 706            | 548             | 1.29            | 0.14049            | 0.00966            | 0.0212            | 0.00038            | 109             | 155             | 133.5            | 8.6            | 134.9            | 2.4             |
| D0004-1@8                 | 636            | 324             | 1.96            | 0.13836            | 0.02059            | 0.0207            | 0.00055            | 120             | 320             | 131.6            | 18             | 132.3            | 3.5             |
| D0004-1@9                 | 754            | 934             | 0.81            | 0.14317            | 0.00634            | 0.0217            | 0.00035            | 89.2            | 103             | 135.9            | 5.6            | 138.5            | 2.2             |
| D0004-1@10                | 726            | 514             | 1.41            | 0.13747            | 0.01085            | 0.0211            | 0.0004             | 67.1            | 180             | 130.8            | 9.7            | 134.3            | 2.5             |
| D0004-1@11                | 2606           | 1798            | 1.45            | 0.14207            | 0.00428            | 0.0212            | 0.00032            | 129             | 68.1            | 134.9            | 3.8            | 135.3            | 2               |
| D0004-1@12                | 540            | 587             | 0.92            | 0.13777            | 0.00801            | 0.0206            | 0.00034            | 127             | 132             | 131.1            | 7.2            | 131.3            | 2.2             |
| D0004-1@13                | 986            | 620             | 1.59            | 0.14213            | 0.00781            | 0.021             | 0.00037            | 151             | 124             | 134.9            | 6.9            | 134.1            | 2.3             |
| D0004-1@14                | 691            | 636             | 1.09            | 0.14238            | 0.00739            | 0.0216            | 0.00035            | 90.8            | 119             | 135.2            | 6.6            | 137.7            | 2.2             |
| D0004-1@15                | 1250           | 894             | 1.40            | 0.1392             | 0.00541            | 0.0205            | 0.00032            | 158             | 86.8            | 132.3            | 4.8            | 130.9            | 2.1             |
| D0004-1@16                | 1303           | 994             | 1.31            | 0.13687            | 0.00615            | 0.0207            | 0.00035            | 98.1            | 103             | 130.3            | 5.5            | 132              | 2.2             |
| D0004-1@17                | 2744           | 1912            | 1.44            | 0.14586            | 0.00399            | 0.0217            | 0.00034            | 135             | 59.8            | 138.3            | 3.5            | 138.5            | 2.1             |
| D0004-1@18                | 187            | 105             | 1.78            | 0.13854            | 0.0413             | 0.0209            | 0.00068            | 109             | 587             | 131.7            | 37             | 133              | 4.3             |
| D0004-1@19                | 1785           | 1579            | 1.13            | 0.14022            | 0.00584            | 0.021             | 0.00035            | 127             | 95              | 133.2            | 5.2            | 133.7            | 2.2             |
| D0004-1@20                | 860            | 617             | 1.39            | 0.14099            | 0.00818            | 0.021             | 0.00036            | 137             | 131             | 133.9            | 7.3            | 133.8            | 2.3             |
| D0004-1@21                | 1944           | 1940            | 1.00            | 0.14432            | 0.00425            | 0.0212            | 0.00033            | 162             | 64.2            | 136.9            | 3.8            | 135.5            | 2.1             |
| D0004-1@22                | 3094           | 2745            | 1.13            | 0.14357            | 0.00386            | 0.0213            | 0.00033            | 140             | 58.1            | 136.2            | 3.4            | 136              | 2.1             |
| D0004-1@23                | 1537           | 1267            | 1.21            | 0.14113            | 0.00528            | 0.0215            | 0.00035            | 78.4            | 85              | 134              | 4.7            | 137.2            | 2.2             |
| D0004-1@24                | 2341           | 2390            | 0.98            | 0.14128            | 0.00433            | 0.0216            | 0.00035            | 75.8            | 68.5            | 134.2            | 3.9            | 137.5            | 2.2             |
| D0004-1@25                | 283            | 156             | 1.81            | 0.13792            | 0.02966            | 0.0206            | 0.00058            | 124             | 443             | 131.2            | 27             | 131.6            | 3.7             |
|                           |                |                 |                 |                    |                    |                   |                    |                 |                 |                  |                |                  |                 |
| ZK26-101-2@1              | 282            | 638             | 0.44            | 0.1414             | 0.02722            | 0.021             | 0.03505            | 136             | 50.9            | 134.3            | 3.4            | 134.2            | 2.1             |
| ZK26-101-2@2              | 161            | 495             | 0.33            | 0.14239            | 0.02683            | 0.0207            | 0.01603            | 193             | 49.9            | 135.2            | 3.4            | 131.9            | 2               |
| ZK26-101-2@3              | 261            | 367             | 0.71            | 0.13609            | 0.02883            | 0.021             | 0.01566            | 54.7            | 57.2            | 129.6            | 3.5            | 133.7            | 2               |
| ZK26-101-2@4              | 183            | 613             | 0.30            | 0.14149            | 0.02414            | 0.0209            | 0.01539            | 158             | 43              | 134.4            | 3              | 133.1            | 2               |
| ZK26-101-2@5              | 222            | 1056            | 0.21            | 0.14335            | 0.02188            | 0.0212            | 0.01536            | 154             | 33.8            | 136              | 2.8            | 135              | 2.2             |
| ZK26-101-2@6              | 110            | 243             | 0.45            | 0.14179            | 0.03251            | 0.0208            | 0.01632            | 165             | 65.6            | 134.6            | 4.1            | 132.9            | 2               |
| ZK26-101-2@7              | 154            | 451             | 0.34            | 0.14738            | 0.02617            | 0.0224            | 0.01536            | 86.7            | 73.2            | 139.6            | 4.6            | 142.7            | 2.1             |
| ZK26-101-2@8              | 327            | 1295            | 0.25            | 0.13705            | 0.02081            | 0.0206            | 0.01511            | 108             | 33              | 130.4            | 2.5            | 131.7            | 2               |
| <del>ZK26-101-2@9</del>   | <del>426</del> | <del>1568</del> | <del>0.27</del> | <del>0.23919</del> | <del>0.02094</del> | <del>0.034</del>  | <del>0.01528</del> | <del>245</del>  | <del>22.5</del> | <del>217.8</del> | <del>3.5</del> | <del>215.3</del> | <del>3.2</del>  |
| ZK26-101-2@10             | 314            | 981             | 0.32            | 0.14045            | 0.0242             | 0.0212            | 0.01501            | 102             | 39.6            | 133.4            | 3              | 135.2            | 2.3             |
| ZK26-101-2@11             | 90             | 133             | 0.68            | 0.14305            | 0.08059            | 0.0207            | 0.01727            | 205             | 174             | 135.8            | 10             | 131.8            | 2.1             |
| ZK26-101-2@12             | 269            | 841             | 0.32            | 0.14271            | 0.02542            | 0.0208            | 0.01605            | 182             | 47              | 135.5            | 3.2            | 132.8            | 2               |
| ZK26-101-2@13             | 314            | 1210            | 0.26            | 0.14978            | 0.02145            | 0.0219            | 0.01509            | 181             | 33.2            | 141.7            | 2.8            | 139.4            | 2.2             |
| ZK26-101-2@14             | 69             | 140             | 0.49            | 0.13639            | 0.04676            | 0.0213            | 0.01591            | 0               | 117             | 129.8            | 5.7            | 136.2            | 2.2             |
|                           |                |                 |                 |                    |                    |                   |                    |                 |                 |                  |                |                  |                 |
| #####                     |                |                 |                 |                    |                    |                   |                    |                 |                 |                  |                |                  |                 |
| ZK26-101-70@1             | 255            | 378             | 0.67            | 0.01598            | 124.22.0           |                   |                    |                 |                 |                  |                |                  |                 |
| ZK26-101-70@2             | 137            | 275             | 0.50            | 0.14647            | 0.04151            | 0.0206            | 0.01742            | 264             | 84.3            | 138.8            | 5.4            | 131.6            | 2.3             |
| ZK26-101-70@3             | 132            | 285             | 0.46            | 0.13936            | 0.04485            | 0.0206            | 0.0155             | 154             | 95.7            | 132.5            | 5.6            | 131.3            | 2               |
| ZK26-101-70@4             | 469            | 1714            | 0.27            | 0.14044            | 0.01935            | 0.0207            | 0.01508            | 156             | 28.2            | 133.4            | 2.4            | 132.2            | 2               |
| ZK26-101-70@5             | 290            | 825             | 0.35            | 0.13861            | 0.02267            | 0.0205            | 0.0151             | 150             | 39.2            | 131.8            | 2.8            | 130.8            | 2               |
| ZK26-101-70@8             | 60             | 135             | 0.44            | 0.14358            | 0.04362            | 0.0205            | 0.01588            | 228             | 91.2            | 136.2            | 5.6            | 131              | 2.1             |
| ZK26-101-70@9             | 141            | 270             | 0.52            | 0.13852            | 0.03672            | 0.021             | 0.01545            | 91.4            | 77.1            | 131.7            | 4.5            | 134              | 2               |
| ZK26-101-70@10            | 245            | 853             | 0.29            | 0.14498            | 0.02191            | 0.0218            | 0.01517            | 115             | 36.9            | 137.5            | 2.8            | 138.8            | 2.1             |
| ZK26-101-70@11            | 85             | 165             | 0.52            | 0.14547            | 0.0538             | 0.0212            | 0.01541            | 179             | 116             | 137.9            | 7              | 135.5            | 2.1             |
| ZK26-101-70@12            | 255            | 900             | 0.28            | 0.14054            | 0.02251            | 0.0211            | 0.01549            | 118             | 38              | 133.5            | 2.8            | 134.4            | 2.1             |
| ZK26-101-70@13            | 214            | 393             | 0.54            | 0.14245            | 0.0283             | 0.0214            | 0.01573            | 117             | 54.6            | 135.2            | 3.6            | 136.3            | 2.1             |
| ZK26-101-70@14            | 162            | 452             | 0.36            | 0.1348             | 0.03731            | 0.0205            | 0.0153             | 84.2            | 78.8            | 128.4            | 4.5            | 130.8            | 2               |
| <del>ZK26-101-70@15</del> | <del>199</del> | <del>518</del>  | <del>0.38</del> | <del>0.11482</del> | <del>0.18211</del> | <del>0.0168</del> | <del>0.01532</del> | <del>172</del>  | <del>376</del>  | <del>110.4</del> | <del>19</del>  | <del>107.5</del> | <del>1.6</del>  |
| ZK26-101-70@16            | 149            | 296             | 0.50            | 0.14192            | 0.03585            | 0.0212            | 0.01722            | 121             | 72.5            | 134.7            | 4.5            | 135.5            | 2.3             |
| ZK26-101-70@17            | 190            | 587             | 0.32            | 0.14388            | 0.02895            | 0.0215            | 0.01521            | 130             | 56.9            | 136.5            | 3.7            | 136.9            | 2.1             |
| ZK26-101-70@18            | 277            | 790             | 0.35            | 0.14016            | 0.02367            | 0.0211            | 0.01516            | 111             | 42.4            | 133.2            | 3              | 134.4            | 2               |
| ZK26-101-70@19            | 100            | 254             | 0.39            | 0.14698            | 0.04791            | 0.0207            | 0.01501            | 259             | 101             | 139.2            | 6.3            | 132.3            | 2               |
| ZK26-101-70@20            | 190            | 317             | 0.60            | 0.13569            | 0.0326             | 0.0218            | 0.0152             | -42.7           | 68.6            | 129.2            | 4              | 138.7            | 2.1             |
| ZK26-101-70@21            | 164            | 381             | 0.43            | 0.13706            | 0.03013            | 0.0206            | 0.01605            | 116             | 59.1            | 130.4            | 3.7            | 131.2            | 2.1             |



|                |     |      |      |  |         |         |        |         |      |      |       |     |       |     |
|----------------|-----|------|------|--|---------|---------|--------|---------|------|------|-------|-----|-------|-----|
| ZK26-101-70@22 | 344 | 1049 | 0.33 |  | 0.1444  | 0.02125 | 0.0215 | 0.01502 | 137  | 35   | 137   | 2.7 | 136.9 | 2   |
| ZK26-101-70@23 | 133 | 261  | 0.51 |  | 0.14109 | 0.03375 | 0.0209 | 0.01513 | 141  | 69.3 | 134   | 4.2 | 133.6 | 2   |
| ZK26-101-70@24 | 151 | 309  | 0.49 |  | 0.15803 | 0.10071 | 0.0209 | 0.01585 | 402  | 209  | 149   | 14  | 133.6 | 2.1 |
| ZK26-101-70@25 | 361 | 792  | 0.46 |  | 0.1349  | 0.02496 | 0.0202 | 0.01552 | 123  | 45.4 | 128.5 | 3   | 128.8 | 2   |
| ZK26-101-70@26 | 227 | 499  | 0.45 |  | 0.13765 | 0.02948 | 0.021  | 0.01501 | 74.5 | 59.2 | 130.9 | 3.6 | 134.1 | 2   |
| ZK26-101-70@27 | 131 | 264  | 0.50 |  | 0.14745 | 0.05931 | 0.0212 | 0.01521 | 219  | 128  | 139.7 | 7.8 | 135   | 2   |
| ZK26-101-70@28 | 252 | 518  | 0.49 |  | 0.14418 | 0.02679 | 0.0215 | 0.01563 | 136  | 50.4 | 136.8 | 3.4 | 136.8 | 2.1 |
| ZK26-101-70@29 | 276 | 541  | 0.51 |  | 0.14717 | 0.0296  | 0.022  | 0.01543 | 121  | 58.5 | 139.4 | 3.9 | 140.5 | 2.1 |

M18b, southmost Jiangxi and northmost Guangdong (Wu et al., 2011a, b)

|              |     |     |      |         |         |  |         |  |  |  |  |  |       |     |
|--------------|-----|-----|------|---------|---------|--|---------|--|--|--|--|--|-------|-----|
| AY015-1.1    | 75  | 88  | 0.85 | 0.063 3 | 0.14400 |  | 0.02178 |  |  |  |  |  | 138.9 | 2.1 |
| AY015-2.1    | 59  | 95  | 0.62 | 0.064 8 | 0.18600 |  | 0.02263 |  |  |  |  |  | 144.2 | 2.3 |
| AY015-3.1    | 170 | 235 | 0.72 | 0.054 9 | 0.14030 |  | 0.02234 |  |  |  |  |  | 142.4 | 1.7 |
| AY015-4.1    | 216 | 258 | 0.84 | 0.053 3 | 0.14000 |  | 0.02221 |  |  |  |  |  | 141.6 | 2.3 |
| AY015-5.1    | 125 | 216 | 0.58 | 0.057 2 | 0.17910 |  | 0.02220 |  |  |  |  |  | 141.5 | 1.7 |
| AY015-6.1    | 123 | 184 | 0.67 | 0.055 2 | 0.14860 |  | 0.02210 |  |  |  |  |  | 140.9 | 1.7 |
| AY015-7.1    | 139 | 289 | 0.48 | 0.054 4 | 0.27090 |  | 0.03649 |  |  |  |  |  | 231   | 2.4 |
| AY015-8.1    | 136 | 253 | 0.54 | 0.053 3 | 0.15460 |  | 0.02240 |  |  |  |  |  | 142.8 | 1.5 |
| AY015-9.1    | 246 | 347 | 0.71 | 0.055 6 | 0.18340 |  | 0.02222 |  |  |  |  |  | 141.7 | 1.5 |
| AY015-10.1   | 129 | 205 | 0.63 | 0.056 0 | 0.14960 |  | 0.02208 |  |  |  |  |  | 140.8 | 1.6 |
| AY015-11.1   | 227 | 353 | 0.64 | 0.053 2 | 0.14930 |  | 0.02205 |  |  |  |  |  | 140.6 | 1.5 |
| AY015-12.1   | 150 | 253 | 0.59 | 0.055 0 | 0.16510 |  | 0.02287 |  |  |  |  |  | 145.8 | 2.2 |
| AY015-13.1   | 196 | 288 | 0.68 | 0.052 2 | 0.15600 |  | 0.02245 |  |  |  |  |  | 143.1 | 1.6 |
| AY015-14.1   | 120 | 189 | 0.63 | 0.0216  | 0.13100 |  | 0.02160 |  |  |  |  |  | 137.8 | 1.7 |
| DCS-110-1.1  | 144 | 194 | 0.74 |         | 0.13500 |  | 0.02088 |  |  |  |  |  | 133.2 | 3.0 |
| DCS-110-2.1  | 452 | 695 | 0.65 |         | 0.14510 |  | 0.02136 |  |  |  |  |  | 136.3 | 2.5 |
| DCS-110-3.1  | 79  | 172 | 0.46 |         | 0.13930 |  | 0.02041 |  |  |  |  |  | 130.2 | 2.8 |
| DCS-110-4.1  | 177 | 200 | 0.89 |         | 0.15000 |  | 0.02149 |  |  |  |  |  | 137.1 | 3.2 |
| DCS-110-5.1  | 338 | 485 | 0.70 |         | 0.14940 |  | 0.02127 |  |  |  |  |  | 135.7 | 3.0 |
| DCS-110-6.1  | 349 | 500 | 0.70 |         | 0.14560 |  | 0.02214 |  |  |  |  |  | 141.2 | 4.0 |
| DCS-110-7.1  | 292 | 506 | 0.58 |         | 0.13660 |  | 0.02143 |  |  |  |  |  | 136.7 | 2.5 |
| DCS-110-8.1  | 271 | 377 | 0.72 |         | 0.14690 |  | 0.02126 |  |  |  |  |  | 135.6 | 2.7 |
| DCS-110-9.1  | 279 | 387 | 0.72 |         | 0.14610 |  | 0.02187 |  |  |  |  |  | 139.5 | 2.8 |
| DCS-110-10.1 | 480 | 644 | 0.75 |         | 0.14840 |  | 0.02117 |  |  |  |  |  | 135.1 | 2.5 |
| DCS-110-11.1 | 575 | 579 | 0.99 |         | 0.15050 |  | 0.02132 |  |  |  |  |  | 136   | 2.7 |
| DCS-110-12.1 | 484 | 572 | 0.85 |         | 0.13670 |  | 0.02094 |  |  |  |  |  | 133.6 | 2.6 |
| DCS-110-13.1 | 448 | 569 | 0.79 |         | 0.1436  |  | 0.0209  |  |  |  |  |  | 133.3 | 2.6 |
| CF102-1.1    | 71  | 126 | 0.56 |         | 0.12040 |  | 0.02070 |  |  |  |  |  | 132.1 | 2.0 |
| CF102-2.1    | 300 | 567 | 0.53 |         | 0.15790 |  | 0.02058 |  |  |  |  |  | 131.3 | 1.2 |
| CF102-3.1    | 358 | 656 | 0.55 |         | 0.14430 |  | 0.02032 |  |  |  |  |  | 129.7 | 1.2 |
| CF102-4.1    | 411 | 659 | 0.62 |         | 0.15230 |  | 0.02030 |  |  |  |  |  | 129.5 | 1.2 |
| CF102-5.1    | 199 | 404 | 0.49 |         | 0.17100 |  | 0.02090 |  |  |  |  |  | 133.4 | 1.6 |
| CF102-6.1    | 317 | 513 | 0.62 |         | 0.15180 |  | 0.02080 |  |  |  |  |  | 132.7 | 1.3 |
| CF102-7.1    | 973 | 634 | 1.53 |         | 0.16690 |  | 0.02079 |  |  |  |  |  | 132.7 | 1.3 |
| CF102-8.1    | 476 | 786 | 0.61 |         | 0.14220 |  | 0.02024 |  |  |  |  |  | 129.2 | 1.2 |
| CF102-9.1    | 498 | 717 | 0.69 |         | 0.13430 |  | 0.02033 |  |  |  |  |  | 129.8 | 1.2 |
| CF102-10.1   | 333 | 570 | 0.58 |         | 0.17560 |  | 0.02085 |  |  |  |  |  | 133   | 1.7 |
| CF102-11.1   | 299 | 460 | 0.65 |         | 0.15570 |  | 0.02063 |  |  |  |  |  | 131.7 | 1.3 |
| CF102-12.1   | 341 | 144 | 2.37 |         | 0.14100 |  | 0.02032 |  |  |  |  |  | 129.7 | 1.8 |
| CF102-13.1   | 248 | 446 | 0.56 |         | 0.11500 |  | 0.02024 |  |  |  |  |  | 129.2 | 1.5 |
| CF102-14.1   | 301 | 220 | 1.37 |         | 0.15060 |  | 0.02022 |  |  |  |  |  | 129   | 1.5 |
| BS201-1.1    | 143 | 386 | 0.37 |         | 0.30610 |  | 0.04184 |  |  |  |  |  | 264.2 | 3.7 |
| BS201-2.1    | 83  | 125 | 0.66 |         | 0.20900 |  | 0.02305 |  |  |  |  |  | 146.9 | 2.5 |
| BS201-3.1    | 311 | 718 | 0.43 |         | 0.15830 |  | 0.02242 |  |  |  |  |  | 142.9 | 2.0 |
| BS201-4.1    | 225 | 568 | 0.40 |         | 0.15360 |  | 0.02184 |  |  |  |  |  | 139.3 | 2.0 |
| BS201-5.1    | 398 | 449 | 0.89 |         | 0.15190 |  | 0.02201 |  |  |  |  |  | 140.3 | 2.1 |
| BS201-6.1    | 319 | 369 | 0.86 |         | 0.16030 |  | 0.02254 |  |  |  |  |  | 143.7 | 2.1 |
| BS201-7.1    | 449 | 764 | 0.59 |         | 0.14620 |  | 0.02277 |  |  |  |  |  | 145.1 | 2.0 |
| BS201-8.1    | 239 | 532 | 0.45 |         | 0.16240 |  | 0.02303 |  |  |  |  |  | 146.8 | 2.1 |
| BS201-9.1    | 171 | 178 | 0.96 |         | 0.17850 |  | 0.02214 |  |  |  |  |  | 141.2 | 2.3 |
| BS201-10.1   | 147 | 211 | 0.70 |         | 0.12900 |  | 0.02184 |  |  |  |  |  | 139.3 | 2.4 |
| BS201-11.1   | 120 | 135 | 0.89 |         | 0.12100 |  | 0.02239 |  |  |  |  |  | 142.8 | 2.7 |
| BS201-12.1   | 170 | 324 | 0.52 |         | 0.26100 |  | 0.03642 |  |  |  |  |  | 230.6 | 3.8 |
| BS201-13.1   | 510 | 788 | 0.65 |         | 0.14480 |  | 0.02122 |  |  |  |  |  | 135.3 | 1.9 |
| BS201-14.1   | 382 | 518 | 0.74 |         | 0.16230 |  | 0.02197 |  |  |  |  |  | 140.1 | 2.0 |
| BS003-1.1    | 119 | 213 | 0.56 |         | 0.14460 |  | 0.01970 |  |  |  |  |  | 125.7 | 2.2 |
| BS003-2.1    | 89  | 168 | 0.53 |         | 0.13600 |  | 0.01987 |  |  |  |  |  | 126.8 | 2.9 |
| BS003-3.1    | 283 | 324 | 0.87 |         | 0.14600 |  | 0.02041 |  |  |  |  |  | 130.2 | 2.2 |
| BS003-4.1    | 104 | 177 | 0.59 |         | 0.14400 |  | 0.02049 |  |  |  |  |  | 130.7 | 2.7 |
| BS003-5.1    | 167 | 263 | 0.63 |         | 0.14900 |  | 0.02087 |  |  |  |  |  | 133.2 | 2.2 |
| BS003-6.1    | 325 | 375 | 0.87 |         | 0.14720 |  | 0.02088 |  |  |  |  |  | 133.2 | 2.0 |
| BS003-7.1    | 104 | 178 | 0.58 |         | 0.16130 |  | 0.02105 |  |  |  |  |  | 134.3 | 2.3 |
| BS003-8.1    | 143 | 225 | 0.64 |         | 0.15000 |  | 0.02102 |  |  |  |  |  | 134.1 | 2.5 |
| BS003-9.1    | 199 | 280 | 0.71 |         | 0.14500 |  | 0.02047 |  |  |  |  |  | 130.6 | 2.1 |
| BS003-10.1   | 268 | 374 | 0.72 |         | 0.13230 |  | 0.02004 |  |  |  |  |  | 127.9 | 2.0 |
| BS003-11.1   | 382 | 507 | 0.75 |         | 0.13400 |  | 0.02019 |  |  |  |  |  | 128.9 | 1.9 |
| BS003-12.1   | 110 | 169 | 0.65 |         | 0.15700 |  | 0.02108 |  |  |  |  |  | 134.5 | 3.1 |
| BS003-13.1   | 309 | 403 | 0.77 |         | 0.19850 |  | 0.02041 |  |  |  |  |  | 130.2 | 3.3 |
| BS003-14.1   | 157 | 210 | 0.75 |         | 0.16200 |  | 0.02059 |  |  |  |  |  | 131.4 | 2.1 |



M18c, southmost Jiangxi and northmost Guangdong (Wu et al., 2012)

|            |     |     |      |  |  |         |         |         |         |  |  |  |  |  |  |  |  |  |  |       |     |
|------------|-----|-----|------|--|--|---------|---------|---------|---------|--|--|--|--|--|--|--|--|--|--|-------|-----|
| CT015-1.1  | 219 | 227 | 0.96 |  |  | 0.10600 | 0.01100 | 0.01467 | 0.00200 |  |  |  |  |  |  |  |  |  |  | 93.9  | 1.9 |
| CT015-1.2  | 140 | 132 | 1.06 |  |  | 0.11300 | 0.01400 | 0.01509 | 0.00220 |  |  |  |  |  |  |  |  |  |  | 96.6  | 2.1 |
| CT015-1.3  | 68  | 174 | 0.04 |  |  | 0.26250 | 0.00200 | 0.03817 | 0.00150 |  |  |  |  |  |  |  |  |  |  | 241.5 | 3.5 |
| CT015-1.4  | 233 | 206 | 1.13 |  |  | 0.08400 | 0.01900 | 0.01464 | 0.00220 |  |  |  |  |  |  |  |  |  |  | 93.7  | 2.0 |
| CT015-1.5  | 160 | 136 | 1.18 |  |  | 0.09200 | 0.03600 | 0.01486 | 0.00310 |  |  |  |  |  |  |  |  |  |  | 95.1  | 2.9 |
| CT015-1.6  | 237 | 183 | 1.30 |  |  | 0.07800 | 0.03500 | 0.01555 | 0.00250 |  |  |  |  |  |  |  |  |  |  | 99.5  | 2.4 |
| CT015-1.7  | 129 | 103 | 1.25 |  |  | 0.13000 | 0.01900 | 0.01576 | 0.00260 |  |  |  |  |  |  |  |  |  |  | 100.8 | 2.6 |
| CT015-1.8  | 87  | 63  | 1.38 |  |  | 0.10200 | 0.04300 | 0.01636 | 0.00340 |  |  |  |  |  |  |  |  |  |  | 104.6 | 3.6 |
| CT015-1.9  | 117 | 109 | 1.07 |  |  | 0.11000 | 0.02300 | 0.01481 | 0.00270 |  |  |  |  |  |  |  |  |  |  | 94.8  | 2.5 |
| CT015-1.10 | 93  | 70  | 1.33 |  |  | 0.08300 | 0.09100 | 0.01476 | 0.00520 |  |  |  |  |  |  |  |  |  |  | 94.4  | 4.8 |
| CT015-1.11 | 125 | 102 | 1.23 |  |  | 0.12300 | 0.02700 | 0.01571 | 0.00280 |  |  |  |  |  |  |  |  |  |  | 100.5 | 2.8 |
| CT015-1.12 | 159 | 134 | 1.19 |  |  | 0.13400 | 0.01600 | 0.01557 | 0.00240 |  |  |  |  |  |  |  |  |  |  | 99.6  | 2.4 |
| CT015-1.13 | 128 | 104 | 1.23 |  |  | 0.12000 | 0.02100 | 0.01565 | 0.00260 |  |  |  |  |  |  |  |  |  |  | 100.1 | 2.6 |
| CT015-1.14 | 135 | 100 | 1.35 |  |  | 0.06800 | 0.02800 | 0.01486 | 0.00250 |  |  |  |  |  |  |  |  |  |  | 95.1  | 2.3 |
| RJ203-1.1  | 131 | 124 | 1.06 |  |  | 0.08200 | 0.02600 | 0.01508 | 0.00310 |  |  |  |  |  |  |  |  |  |  | 96.5  | 3.0 |
| RJ203-1.2  | 393 | 309 | 1.27 |  |  | 0.09420 | 0.00810 | 0.01465 | 0.00230 |  |  |  |  |  |  |  |  |  |  | 93.7  | 2.2 |
| RJ203-1.3  | 967 | 746 | 1.30 |  |  | 0.10150 | 0.00450 | 0.01534 | 0.00190 |  |  |  |  |  |  |  |  |  |  | 98.1  | 1.9 |
| RJ203-1.4  | 431 | 505 | 0.85 |  |  | 0.09330 | 0.00810 | 0.01461 | 0.00200 |  |  |  |  |  |  |  |  |  |  | 93.5  | 1.9 |
| RJ203-1.5  | 483 | 466 | 1.04 |  |  | 0.07900 | 0.01900 | 0.01522 | 0.00220 |  |  |  |  |  |  |  |  |  |  | 97.4  | 2.1 |
| RJ203-1.6  | 201 | 189 | 1.06 |  |  | 0.09400 | 0.01500 | 0.01531 | 0.00260 |  |  |  |  |  |  |  |  |  |  | 98.0  | 2.5 |
| RJ203-1.7  | 267 | 263 | 1.02 |  |  | 0.08500 | 0.01600 | 0.01436 | 0.00240 |  |  |  |  |  |  |  |  |  |  | 91.9  | 2.2 |
| RJ203-1.8  | 489 | 354 | 1.38 |  |  | 0.07110 | 0.00940 | 0.01495 | 0.00210 |  |  |  |  |  |  |  |  |  |  | 95.7  | 2.0 |
| RJ203-1.9  | 553 | 449 | 1.23 |  |  | 0.09280 | 0.00620 | 0.01488 | 0.00200 |  |  |  |  |  |  |  |  |  |  | 95.2  | 1.9 |
| RJ203-1.10 | 736 | 617 | 1.19 |  |  | 0.09320 | 0.00560 | 0.01466 | 0.00190 |  |  |  |  |  |  |  |  |  |  | 93.8  | 1.8 |
| RJ203-1.11 | 326 | 391 | 0.83 |  |  | 0.09870 | 0.00510 | 0.01560 | 0.00210 |  |  |  |  |  |  |  |  |  |  | 99.8  | 2.1 |
| RJ203-1.12 | 543 | 374 | 1.45 |  |  | 0.09570 | 0.00560 | 0.01490 | 0.00210 |  |  |  |  |  |  |  |  |  |  | 95.4  | 2.0 |
| RJ203-1.13 | 765 | 644 | 1.19 |  |  | 0.09010 | 0.00490 | 0.01450 | 0.00190 |  |  |  |  |  |  |  |  |  |  | 92.8  | 1.7 |
| RJ203-1.14 | 259 | 355 | 0.73 |  |  | 0.09510 | 0.00670 | 0.01521 | 0.00210 |  |  |  |  |  |  |  |  |  |  | 97.3  | 2.0 |
| XW003-1.1  | 126 | 107 | 1.18 |  |  | 0.10710 | 0.00610 | 0.01507 | 0.00230 |  |  |  |  |  |  |  |  |  |  | 96.8  | 2.4 |
| XW003-1.2  | 338 | 405 | 0.83 |  |  | 0.10620 | 0.00510 | 0.01529 | 0.00190 |  |  |  |  |  |  |  |  |  |  | 97.6  | 1.9 |
| XW003-1.3  | 293 | 361 | 0.81 |  |  | 0.09500 | 0.00380 | 0.01504 | 0.00190 |  |  |  |  |  |  |  |  |  |  | 95.7  | 1.9 |
| XW003-1.4  | 382 | 564 | 0.68 |  |  | 0.10170 | 0.00510 | 0.01515 | 0.00180 |  |  |  |  |  |  |  |  |  |  | 97.2  | 1.8 |
| XW003-1.5  | 239 | 296 | 0.81 |  |  | 0.10910 | 0.00720 | 0.01470 | 0.00190 |  |  |  |  |  |  |  |  |  |  | 92.4  | 1.9 |
| XW003-1.6  | 614 | 667 | 0.92 |  |  | 0.10440 | 0.00570 | 0.01518 | 0.00210 |  |  |  |  |  |  |  |  |  |  | 97.9  | 2.1 |
| XW003-1.7  | 206 | 244 | 0.84 |  |  | 0.10970 | 0.00720 | 0.01509 | 0.00200 |  |  |  |  |  |  |  |  |  |  | 94.6  | 2.2 |
| XW003-1.8  | 393 | 452 | 0.87 |  |  | 0.11180 | 0.00330 | 0.01545 | 0.00190 |  |  |  |  |  |  |  |  |  |  | 98.2  | 1.9 |
| XW003-1.9  | 326 | 376 | 0.87 |  |  | 0.10160 | 0.00890 | 0.01530 | 0.00190 |  |  |  |  |  |  |  |  |  |  | 96.3  | 2.0 |
| XW003-1.10 | 297 | 373 | 0.80 |  |  | 0.10870 | 0.00660 | 0.01516 | 0.00190 |  |  |  |  |  |  |  |  |  |  | 95.4  | 2.0 |
| XW003-1.11 | 851 | 730 | 1.17 |  |  | 0.11760 | 0.00290 | 0.01520 | 0.00180 |  |  |  |  |  |  |  |  |  |  | 96.7  | 1.7 |
| XW003-1.12 | 344 | 398 | 0.86 |  |  | 0.10730 | 0.00410 | 0.01519 | 0.00190 |  |  |  |  |  |  |  |  |  |  | 96.5  | 1.9 |
| XW003-1.13 | 402 | 508 | 0.79 |  |  | 0.09930 | 0.00360 | 0.01516 | 0.00190 |  |  |  |  |  |  |  |  |  |  | 96.6  | 1.9 |
| XW003-1.14 | 211 | 207 | 1.02 |  |  | 0.09860 | 0.00970 | 0.01542 | 0.00210 |  |  |  |  |  |  |  |  |  |  | 97.8  | 2.3 |

3.Fujian province

L8, Golden Lake of Taining county in Taining Basin

|    |            |     |     |      |         |         |         |         |         |         |         |         |      |      |     |     |    |     |     |      |     |     |
|----|------------|-----|-----|------|---------|---------|---------|---------|---------|---------|---------|---------|------|------|-----|-----|----|-----|-----|------|-----|-----|
| H1 | 1110-01-1  | 103 | 70  | 1.46 | 0.05348 | 0.00495 | 0.11291 | 0.01041 | 0.01532 | 0.00028 | 0.00341 | 0.00022 | 0.08 | 349  | 212 | 109 | 9  | 98  | 2.0 | 69   | 4   | 0.9 |
|    | 1110-01-2  | 85  | 44  | 1.91 | 0.05080 | 0.00883 | 0.10828 | 0.01870 | 0.01546 | 0.00038 | 0.00445 | 0.00040 | 0.03 | 232  | 339 | 104 | 17 | 99  | 2.0 | 90   | 8   | 1.0 |
|    | 1110-01-3  | 110 | 61  | 1.79 | 0.04726 | 0.00609 | 0.09717 | 0.01246 | 0.01492 | 0.00030 | 0.00295 | 0.00022 | 0.05 | 62   | 257 | 94  | 12 | 95  | 2.0 | 60   | 4   | 1.0 |
|    | 1110-01-4  | 234 | 93  | 2.52 | 0.05020 | 0.00467 | 0.10752 | 0.00993 | 0.01553 | 0.00030 | 0.00499 | 0.00043 | 0.07 | 204  | 212 | 104 | 9  | 99  | 2.0 | 101  | 9   | 1.0 |
|    | 1110-01-5  | 85  | 55  | 1.53 | 0.04782 | 0.00670 | 0.09712 | 0.01356 | 0.01473 | 0.00030 | 0.00409 | 0.00037 | 0.05 | 90   | 276 | 94  | 13 | 94  | 2.0 | 82   | 7   | 1.0 |
|    | 1110-01-6  | 63  | 42  | 1.50 | 0.04880 | 0.00883 | 0.10020 | 0.01804 | 0.01489 | 0.00034 | 0.00531 | 0.00056 | 0.02 | 138  | 334 | 97  | 17 | 95  | 2.0 | 107  | 11  | 1.0 |
|    | 1110-01-7  | 177 | 72  | 2.47 | 0.05787 | 0.00562 | 0.12116 | 0.01166 | 0.01519 | 0.00031 | 0.00428 | 0.00037 | 0.06 | 525  | 221 | 116 | 11 | 97  | 2.0 | 86   | 7   | 0.8 |
|    | 1110-01-8  | 57  | 37  | 1.56 | 0.04756 | 0.00940 | 0.10060 | 0.01980 | 0.01534 | 0.00037 | 0.00428 | 0.00048 | 0.03 | 77   | 349 | 97  | 18 | 98  | 2.0 | 86   | 10  | 1.0 |
|    | 1110-01-9  | 368 | 123 | 2.99 | 0.04813 | 0.00507 | 0.10122 | 0.01058 | 0.01526 | 0.00033 | 0.00353 | 0.00028 | 0.07 | 106  | 232 | 98  | 10 | 98  | 2.0 | 71   | 6   | 1.0 |
|    | 1110-01-10 | 328 | 126 | 2.61 | 0.04847 | 0.00339 | 0.10055 | 0.00700 | 0.01504 | 0.00026 | 0.00408 | 0.00030 | 0.11 | 122  | 157 | 97  | 6  | 96  | 2.0 | 82   | 6   | 1.0 |
|    | 1110-01-11 | 81  | 40  | 2.03 | 0.04849 | 0.00964 | 0.10376 | 0.02053 | 0.01552 | 0.00039 | 0.00442 | 0.00046 | 0.03 | 123  | 354 | 100 | 19 | 99  | 2.0 | 89   | 9   | 1.0 |
|    | 1110-01-12 | 83  | 44  | 1.89 | 0.06289 | 0.00892 | 0.13053 | 0.01835 | 0.01506 | 0.00037 | 0.00436 | 0.00047 | 0.04 | 705  | 318 | 125 | 16 | 96  | 2.0 | 88   | 9   | 0.8 |
|    | 1110-01-13 | 81  | 43  | 1.86 | 0.05090 | 0.00883 | 0.10545 | 0.01820 | 0.01503 | 0.00036 | 0.00433 | 0.00048 | 0.03 | 236  | 339 | 102 | 17 | 96  | 2.0 | 87   | 10  | 0.9 |
|    | 1110-01-14 | 78  | 48  | 1.60 | 0.06169 | 0.00881 | 0.12684 | 0.01794 | 0.01492 | 0.00038 | 0.00480 | 0.00060 | 0.04 | 663  | 322 | 121 | 16 | 95  | 2.0 | 97   | 12  | 0.8 |
|    | 1110-01-15 | 125 | 55  | 2.27 | 0.05898 | 0.00762 | 0.12442 | 0.01593 | 0.01531 | 0.00036 | 0.00354 | 0.00036 | 0.04 | 566  | 293 | 119 | 14 | 98  | 2.0 | 71   | 7   | 0.8 |
| H2 | 1110-02-1D | 132 | 65  | 2.02 | 0.03925 | 0.00425 | 0.08269 | 0.00889 | 0.01529 | 0.00031 | 0.00406 | 0.00031 | 0.06 | -334 | 210 | 81  | 8  | 98  | 2.0 | 82   | 6   | 1.2 |
|    | 1110-02-2  | 192 | 74  | 2.60 | 0.04779 | 0.00618 | 0.09889 | 0.01271 | 0.01501 | 0.00031 | 0.00491 | 0.00039 | 0.04 | 89   | 258 | 96  | 12 | 96  | 2.0 | 99   | 8   | 1.0 |
|    | 1110-02-3  | 157 | 110 | 1.43 | 0.04707 | 0.00497 | 0.10075 | 0.01061 | 0.01553 | 0.00028 | 0.00329 | 0.00018 | 0.07 | 53   | 222 | 97  | 10 | 99  | 2.0 | 66   | 4   | 1.0 |
|    | 1110-02-4  | 295 | 125 | 2.36 | 0.04836 | 0.00363 | 0.10300 | 0.00770 | 0.01545 | 0.00026 | 0.00363 | 0.00024 | 0.09 | 117  | 169 | 100 | 7  | 99  | 2.0 | 73   | 5   | 1.0 |
|    | 1110-02-5  | 404 | 117 | 3.45 | 0.04782 | 0.00510 | 0.09921 | 0.01043 | 0.01504 | 0.00038 | 0.00078 | 0.00004 | 0.06 | 90   | 230 | 96  | 10 | 96  | 2.0 | 15.8 | 0.8 | 1.0 |
|    | 1110-02-6  | 303 | 89  | 3.39 | 0.04573 | 0.00409 | 0.09524 | 0.00846 | 0.01511 | 0.00028 | 0.00474 | 0.00041 | 0.07 | -16  | 193 | 92  | 8  | 97  | 2.0 | 96   | 8   | 1.1 |
|    | 1110-02-7  | 245 | 84  | 2.92 | 0.04795 | 0.00433 | 0.10263 | 0.00923 | 0.01553 | 0.00027 | 0.00298 | 0.00016 | 0.08 | 97   | 200 | 99  | 8  | 99  | 2.0 | 60   | 3   | 1.0 |
|    | 1110-02-8  | 100 | 58  | 1.73 | 0.04753 | 0.00495 | 0.09826 | 0.01017 | 0.01500 | 0.00028 | 0.00403 | 0.00030 | 0.06 | 76   | 224 | 95  | 9  | 96  | 2.0 | 81   | 6   | 1.0 |
|    | 1110-02-9  | 704 | 167 | 4.21 | 0.04626 | 0.00649 | 0.09592 | 0.01341 | 0.01504 | 0.00031 | 0.00212 | 0.00014 | 0.05 | 11   | 259 | 93  | 12 | 96  | 2.0 | 43   | 3   | 1.0 |
|    | 1110-02-10 | 362 | 99  | 3.65 | 0.05028 | 0.00279 | 0.10619 | 0.00587 | 0.01532 | 0.00025 | 0.00362 | 0.00026 | 0.13 | 208  | 128 | 102 | 5  | 98  | 2.0 | 73   | 5   | 1.0 |
|    | 1110-02-11 | 521 | 114 | 4.59 | 0.05505 | 0.00380 | 0.11444 | 0.00786 | 0.01508 | 0.00025 | 0.00205 | 0.00009 | 0.10 | 414  | 159 | 110 | 7  | 96  | 2.0 | 41   | 2   | 0.9 |
|    | 1110-02-12 | 516 | 95  | 5.44 | 0.04833 | 0.00410 | 0.10004 | 0.00843 | 0.01502 | 0.00028 | 0.00305 | 0.00021 | 0.08 | 115  | 191 | 97  | 8  | 96  | 2.0 | 62   | 4   | 1.0 |
|    | 1110-02-13 | 768 | 231 | 3.32 | 0.05027 | 0.00583 | 0.10875 | 0.01247 | 0.01569 | 0.00037 | 0.00465 | 0.00064 | 0.05 | 207  | 261 | 105 | 11 | 100 | 2.0 | 94   | 13  | 1.0 |
|    | 1110-02-14 | 301 | 139 | 2.16 | 0.04645 | 0.00274 | 0.09985 | 0.00585 | 0.01559 | 0.00029 | 0.00183 | 0.00012 | 0.14 | 21   | 129 | 97  | 5  | 100 | 2.0 | 37   | 2   | 1.0 |
|    | 1110-02-15 | 9   | 244 | 0.04 | 0.05447 | 0.00450 | 0.11291 | 0.00923 | 0.01504 | 0.00032 | 0.00273 | 0.00024 | 0.09 | 391  | 190 | 109 | 8  | 96  | 2.0 | 55   | 5   | 0.9 |
| H3 | 1110-03-1  | 171 | 45  | 3.79 | 0.04779 | 0.00716 | 0.09770 | 0.01457 | 0.01483 | 0.00032 | 0.00393 | 0.00027 | 0.04 | 89   | 282 | 95  | 13 | 95  | 2.0 | 79   | 5   | 1.0 |
|    | 1110-03-2  | 127 | 35  | 3.63 | 0.05058 | 0.00988 | 0.10227 | 0.01986 | 0.01466 | 0.00038 | 0.00421 | 0.00039 | 0.02 | 222  | 364 | 99  | 18 | 94  | 2.0 | 85   | 8   | 0.9 |



|    |            |      |      |      |         |         |         |         |         |         |         |         |      |      |     |      |    |      |      |     |    |     |
|----|------------|------|------|------|---------|---------|---------|---------|---------|---------|---------|---------|------|------|-----|------|----|------|------|-----|----|-----|
|    | 1110-03-3  | 142  | 49   | 2.93 | 0.04734 | 0.00645 | 0.09886 | 0.01340 | 0.01515 | 0.00030 | 0.00389 | 0.00029 | 0.04 | 66   | 268 | 96   | 12 | 97   | 2.0  | 78  | 6  | 1.0 |
|    | 1110-03-4  | 259  | 123  | 2.10 | 0.04786 | 0.00283 | 0.09969 | 0.00588 | 0.01511 | 0.00024 | 0.00360 | 0.00025 | 0.13 | 92   | 132 | 96   | 5  | 97   | 2.0  | 73  | 5  | 1.0 |
|    | 1110-03-5  | 991  | 383  | 2.59 | 0.04904 | 0.00122 | 0.10324 | 0.00265 | 0.01527 | 0.00021 | 0.00402 | 0.00024 | 0.32 | 150  | 60  | 100  | 2  | 98   | 1.0  | 81  | 5  | 1.0 |
|    | 1110-03-6  | 119  | 33   | 3.57 | 0.04805 | 0.00940 | 0.10060 | 0.01958 | 0.01518 | 0.00037 | 0.00334 | 0.00034 | 0.02 | 102  | 348 | 97   | 18 | 97   | 2.0  | 67  | 7  | 1.0 |
|    | 1110-03-7  | 120  | 39   | 3.04 | 0.04797 | 0.01036 | 0.10152 | 0.02178 | 0.01535 | 0.00045 | 0.00429 | 0.00047 | 0.02 | 98   | 375 | 98   | 20 | 98   | 3.0  | 87  | 9  | 1.0 |
|    | 1110-03-8  | 137  | 48   | 2.85 | 0.04776 | 0.00659 | 0.09863 | 0.01355 | 0.01498 | 0.00030 | 0.00408 | 0.00033 | 0.04 | 87   | 276 | 96   | 13 | 96   | 2.0  | 82  | 7  | 1.0 |
|    | 1110-03-9  | 124  | 39   | 3.19 | 0.04807 | 0.00772 | 0.10412 | 0.01665 | 0.01571 | 0.00035 | 0.00416 | 0.00034 | 0.04 | 103  | 299 | 101  | 15 | 100  | 2.0  | 84  | 7  | 1.0 |
|    | 1110-03-10 | 201  | 54   | 3.74 | 0.04759 | 0.00599 | 0.10008 | 0.01253 | 0.01525 | 0.00030 | 0.00367 | 0.00029 | 0.04 | 79   | 253 | 97   | 12 | 98   | 2.0  | 74  | 6  | 1.0 |
|    | 1110-03-11 | 379  | 195  | 1.94 | 0.04939 | 0.00256 | 0.10398 | 0.00536 | 0.01527 | 0.00026 | 0.00326 | 0.00030 | 0.15 | 166  | 119 | 100  | 5  | 98   | 2.0  | 66  | 6  | 1.0 |
|    | 1110-03-12 | 287  | 72   | 4.01 | 0.04963 | 0.00487 | 0.10422 | 0.01016 | 0.01523 | 0.00030 | 0.00369 | 0.00033 | 0.07 | 178  | 223 | 101  | 9  | 97   | 2.0  | 74  | 7  | 1.0 |
|    | 1110-03-13 | 190  | 61   | 3.13 | 0.04813 | 0.00531 | 0.10235 | 0.01123 | 0.01543 | 0.00030 | 0.00401 | 0.00036 | 0.06 | 106  | 238 | 99   | 10 | 99   | 2.0  | 81  | 7  | 1.0 |
|    | 1110-03-14 | 120  | 36   | 3.32 | 0.04370 | 0.01073 | 0.09095 | 0.02222 | 0.01510 | 0.00044 | 0.00571 | 0.00083 | 0.02 | -86  | 374 | 88   | 21 | 97   | 3.0  | 115 | 17 | 1.1 |
|    | 1110-03-15 | 126  | 39   | 3.24 | 0.04774 | 0.00805 | 0.09893 | 0.01662 | 0.01503 | 0.00033 | 0.00437 | 0.00045 | 0.04 | 86   | 310 | 96   | 15 | 96   | 2.0  | 88  | 9  | 1.0 |
| H4 | 1110-04-1  | 950  | 288  | 3.30 | 0.04978 | 0.00215 | 0.14692 | 0.00639 | 0.02140 | 0.00034 | 0.00375 | 0.00030 | 0.20 | 185  | 101 | 139  | 6  | 136  | 2.0  | 76  | 6  | 1.0 |
|    | 1110-04-2  | 867  | 441  | 1.97 | 0.04743 | 0.00175 | 0.11570 | 0.00432 | 0.01769 | 0.00027 | 0.00254 | 0.00018 | 0.23 | 71   | 82  | 111  | 4  | 113  | 2.0  | 51  | 4  | 1.0 |
|    | 1110-04-3  | 1591 | 1116 | 1.43 | 0.05086 | 0.00097 | 0.25867 | 0.00536 | 0.03688 | 0.00054 | 0.00704 | 0.00069 | 0.46 | 234  | 45  | 234  | 4  | 233  | 3.0  | 142 | 14 | 1.0 |
|    | 1110-04-4  | 1262 | 288  | 4.39 | 0.06079 | 0.00145 | 1.10608 | 0.02754 | 0.13204 | 0.00216 | 0.00918 | 0.00054 | 0.39 | 632  | 53  | 756  | 13 | 799  | 12.0 | 185 | 11 | 1.1 |
|    | 1110-04-5  | 323  | 396  | 0.81 | 0.05286 | 0.00120 | 0.38014 | 0.00912 | 0.05216 | 0.00079 | 0.00768 | 0.00057 | 0.40 | 323  | 53  | 327  | 7  | 328  | 5.0  | 155 | 11 | 1.0 |
|    | 1110-04-6  | 231  | 64   | 3.62 | 0.05272 | 0.00693 | 0.25371 | 0.03308 | 0.03489 | 0.00085 | 0.00865 | 0.00140 | 0.05 | 317  | 298 | 230  | 27 | 221  | 5.0  | 174 | 28 | 1.0 |
|    | 1110-04-7  | 92   | 69   | 1.33 | 0.10498 | 0.00207 | 4.24939 | 0.09024 | 0.29353 | 0.00446 | 0.04519 | 0.00426 | 0.45 | 1714 | 37  | 1684 | 17 | 1659 | 22.0 | 893 | 82 | 1.0 |
|    | 1110-04-8  | 145  | 43   | 3.40 | 0.04889 | 0.01649 | 0.11820 | 0.03970 | 0.01753 | 0.00062 | 0.00286 | 0.00048 | 0.01 | 143  | 571 | 113  | 36 | 112  | 4.0  | 58  | 10 | 1.0 |
|    | 1110-04-9  | 2431 | 297  | 8.18 | 0.04902 | 0.00177 | 0.24727 | 0.00905 | 0.03660 | 0.00060 | 0.00369 | 0.00025 | 0.25 | 149  | 85  | 224  | 7  | 232  | 4.0  | 74  | 5  | 1.0 |
|    | 1110-04-10 | 748  | 255  | 2.93 | 0.04867 | 0.00300 | 0.12240 | 0.00754 | 0.01824 | 0.00032 | 0.00211 | 0.00017 | 0.14 | 132  | 139 | 117  | 7  | 117  | 2.0  | 43  | 3  | 1.0 |
|    | 1110-04-11 | 523  | 194  | 2.69 | 0.04622 | 0.00584 | 0.13776 | 0.01717 | 0.02166 | 0.00061 | 0.00142 | 0.00017 | 0.05 | 9    | 241 | 131  | 15 | 138  | 4.0  | 29  | 3  | 1.1 |
|    | 1110-04-12 | 413  | 130  | 3.18 | 0.05131 | 0.00587 | 0.12116 | 0.01377 | 0.01712 | 0.00036 | 0.00257 | 0.00028 | 0.06 | 255  | 258 | 116  | 12 | 109  | 2.0  | 52  | 6  | 0.9 |
|    | 1110-04-13 | 437  | 140  | 3.12 | 0.04840 | 0.00626 | 0.12249 | 0.01571 | 0.01836 | 0.00045 | 0.00193 | 0.00021 | 0.05 | 119  | 263 | 117  | 14 | 117  | 3.0  | 39  | 4  | 1.0 |
|    | 1110-04-14 | 411  | 123  | 3.34 | 0.04998 | 0.00312 | 0.25137 | 0.01568 | 0.03648 | 0.00065 | 0.00495 | 0.00046 | 0.14 | 194  | 143 | 228  | 13 | 231  | 4.0  | 100 | 9  | 1.0 |
|    | 1110-04-15 | 196  | 30   | 6.63 | 0.10987 | 0.00257 | 4.45555 | 0.10926 | 0.29408 | 0.00464 | 0.03679 | 0.00341 | 0.39 | 1797 | 44  | 1723 | 20 | 1662 | 23.0 | 730 | 66 | 1.0 |
|    | 1110-04-16 | 663  | 209  | 3.17 | 0.04944 | 0.00267 | 0.15843 | 0.00857 | 0.02324 | 0.00039 | 0.00331 | 0.00034 | 0.16 | 169  | 124 | 149  | 8  | 148  | 2.0  | 67  | 7  | 1.0 |
|    | 1110-04-17 | 701  | 202  | 3.46 | 0.04877 | 0.00427 | 0.26419 | 0.02255 | 0.03962 | 0.00104 | 0.00314 | 0.00044 | 0.07 | 137  | 198 | 238  | 18 | 250  | 6.0  | 63  | 9  | 1.1 |
|    | 1110-04-18 | 684  | 152  | 4.49 | 0.04919 | 0.00539 | 0.12262 | 0.01333 | 0.01808 | 0.00040 | 0.00255 | 0.00031 | 0.06 | 157  | 246 | 117  | 12 | 116  | 3.0  | 51  | 6  | 1.0 |
|    | 1110-04-19 | 315  | 279  | 1.13 | 0.11511 | 0.00299 | 4.83368 | 0.12908 | 0.30512 | 0.00512 | 0.02528 | 0.00261 | 0.36 | 1882 | 48  | 1791 | 22 | 1717 | 25.0 | 505 | 51 | 1.0 |
|    | 1110-04-20 | 725  | 430  | 1.68 | 0.05064 | 0.00187 | 0.25193 | 0.00930 | 0.03609 | 0.00062 | 0.00363 | 0.00038 | 0.23 | 224  | 87  | 228  | 8  | 229  | 4.0  | 73  | 8  | 1.0 |
| H5 | 0125-01-1  | 590  | 252  | 2.34 | 0.04779 | 0.00112 | 0.10206 | 0.00241 | 0.01549 | 0.00021 | 0.00399 | 0.00015 | 0.30 | 89   | 56  | 99   | 2  | 99   | 1.0  | 80  | 3  | 1.0 |
|    | 0125-01-2  | 254  | 85   | 3.01 | 0.05016 | 0.00244 | 0.10067 | 0.00480 | 0.01456 | 0.00027 | 0.00183 | 0.00008 | 0.14 | 202  | 113 | 97   | 4  | 93   | 2.0  | 37  | 2  | 1.0 |
|    | 0125-01-3  | 355  | 183  | 1.95 | 0.04799 | 0.00205 | 0.09871 | 0.00408 | 0.01493 | 0.00025 | 0.00461 | 0.00034 | 0.12 | 99   | 96  | 96   | 4  | 96   | 2.0  | 93  | 7  | 1.0 |
|    | 0125-01-4  | 418  | 226  | 1.85 | 0.04921 | 0.00213 | 0.10875 | 0.00458 | 0.01603 | 0.00028 | 0.00400 | 0.00032 | 0.14 | 158  | 100 | 105  | 4  | 103  | 2.0  | 81  | 6  | 1.0 |
|    | 0125-01-5  | 1520 | 748  | 2.03 | 0.04864 | 0.00064 | 0.13431 | 0.00197 | 0.02003 | 0.00025 | 0.00430 | 0.00012 | 0.54 | 131  | 32  | 128  | 2  | 128  | 2.0  | 87  | 2  | 1.0 |
|    | 0125-01-6  | 193  | 68   | 2.86 | 0.04843 | 0.00201 | 0.10435 | 0.00428 | 0.01563 | 0.00025 | 0.00304 | 0.00012 | 0.16 | 120  | 95  | 101  | 4  | 100  | 2.0  | 61  | 2  | 1.0 |
|    | 0125-01-7  | 98   | 38   | 2.59 | 0.04838 | 0.00385 | 0.10218 | 0.00789 | 0.01532 | 0.00036 | 0.00454 | 0.00037 | 0.05 | 118  | 179 | 99   | 7  | 98   | 2.0  | 92  | 7  | 1.0 |
|    | 0125-01-8  | 1085 | 523  | 2.07 | 0.04926 | 0.00084 | 0.15103 | 0.00281 | 0.02225 | 0.00031 | 0.00250 | 0.00010 | 0.48 | 160  | 41  | 143  | 2  | 142  | 2.0  | 50  | 2  | 1.0 |
|    | 0125-01-9  | 730  | 264  | 2.76 | 0.07163 | 0.00108 | 1.54800 | 0.02495 | 0.15676 | 0.00198 | 0.04071 | 0.00237 | 0.47 | 975  | 31  | 950  | 10 | 939  | 11.0 | 807 | 46 | 1.0 |
|    | 0125-01-10 | 266  | 91   | 2.91 | 0.04910 | 0.00271 | 0.10860 | 0.00583 | 0.01604 | 0.00031 | 0.00420 | 0.00035 | 0.10 | 153  | 126 | 105  | 5  | 103  | 2.0  | 85  | 7  | 1.0 |
|    | 0125-01-11 | 688  | 355  | 1.94 | 0.04812 | 0.00187 | 0.10669 | 0.00406 | 0.01608 | 0.00027 | 0.00390 | 0.00027 | 0.17 | 105  | 88  | 103  | 4  | 103  | 2.0  | 79  | 5  | 1   |



|               |              |               |       |      |         |         |         |         |         |         |         |         |         |      |     |     |     |     |     |     |    |     |
|---------------|--------------|---------------|-------|------|---------|---------|---------|---------|---------|---------|---------|---------|---------|------|-----|-----|-----|-----|-----|-----|----|-----|
|               | SX-04-11     | 303           | 66    | 4.56 | 0.05510 | 0.00428 | 0.10961 | 0.00828 | 0.01443 | 0.00033 | 0.00350 | 0.00018 | 0.06    | 416  | 128 | 106 | 8   | 92  | 2.0 | 71  | 4  | 0.9 |
|               | SX-04-12     | 415           | 60    | 6.97 | 0.05314 | 0.00742 | 0.10592 | 0.01433 | 0.01446 | 0.00054 | 0.00411 | 0.00026 | 0.02    | 335  | 235 | 102 | 13  | 93  | 3.0 | 83  | 5  | 0.9 |
|               | SX-04-13     | 108           | 24    | 4.45 | 0.05356 | 0.00825 | 0.10837 | 0.01637 | 0.01468 | 0.00049 | 0.00413 | 0.00032 | 0.02    | 353  | 275 | 104 | 15  | 94  | 3.0 | 83  | 6  | 0.9 |
|               | SX-04-14     | 131           | 28    | 4.74 | 0.05405 | 0.00867 | 0.10806 | 0.01700 | 0.01450 | 0.00050 | 0.00400 | 0.00031 | 0.02    | 373  | 287 | 104 | 16  | 93  | 3.0 | 81  | 6  | 0.9 |
|               | SX-04-15     | 267           | 42    | 6.38 | 0.05038 | 0.00502 | 0.10193 | 0.00997 | 0.01468 | 0.00035 | 0.00383 | 0.00018 | 0.04    | 213  | 176 | 99  | 9   | 94  | 2.0 | 77  | 4  | 0.9 |
| I2            | 150122-01-01 | 218.9         | 86.5  | 2.53 | 0.04927 | 0.00484 | 0.09848 | 0.00932 | 0.01450 | 0.00044 | 0.00404 | 0.00028 | 0.04    | 161  | 223 | 95  | 9   | 93  | 3.0 | 81  | 6  | 1.0 |
|               | 150122-01-02 | 372.3         | 143.0 | 2.60 | 0.04863 | 0.00214 | 0.09788 | 0.00417 | 0.01461 | 0.00025 | 0.00423 | 0.00017 | 0.12    | 130  | 101 | 95  | 4   | 94  | 2.0 | 85  | 3  | 1.0 |
|               | 150122-01-03 | 38.1          | 16.3  | 2.33 | 0.04703 | 0.00976 | 0.10572 | 0.02158 | 0.01631 | 0.00066 | 0.00344 | 0.00030 | 0.01    | 51   | 357 | 102 | 20  | 104 | 4.0 | 69  | 6  | 1.0 |
|               | 150122-01-04 | 193.2         | 85.1  | 2.27 | 0.04755 | 0.00309 | 0.09939 | 0.00626 | 0.01516 | 0.00033 | 0.00440 | 0.00021 | 0.08    | 77   | 145 | 96  | 6   | 97  | 2.0 | 89  | 4  | 1.0 |
|               | 150122-01-05 | 164.2         | 72.0  | 2.28 | 0.04775 | 0.00376 | 0.10487 | 0.00799 | 0.01593 | 0.00039 | 0.00458 | 0.00027 | 0.05    | 87   | 176 | 101 | 7   | 102 | 2.0 | 92  | 5  | 1.0 |
|               | 150122-01-06 | 754.6         | 247.0 | 3.05 | 0.04815 | 0.00264 | 0.10353 | 0.00546 | 0.01560 | 0.00034 | 0.00300 | 0.00018 | 0.11    | 107  | 123 | 100 | 5   | 100 | 2.0 | 61  | 4  | 1.0 |
|               | 150122-01-07 | 144.6         | 72.0  | 2.01 | 0.05397 | 0.00407 | 0.10545 | 0.00763 | 0.01417 | 0.00036 | 0.00410 | 0.00027 | 0.05    | 370  | 174 | 102 | 7   | 91  | 2.0 | 83  | 5  | 0.9 |
|               | 150122-01-08 | 319.5         | 124.4 | 2.57 | 0.04847 | 0.00219 | 0.10070 | 0.00441 | 0.01507 | 0.00027 | 0.00407 | 0.00019 | 0.13    | 122  | 103 | 97  | 4   | 96  | 2.0 | 82  | 4  | 1.0 |
|               | 150122-01-10 | 133.0         | 65.9  | 2.02 | 0.04734 | 0.00360 | 0.09842 | 0.00727 | 0.01508 | 0.00035 | 0.00429 | 0.00027 | 0.06    | 66   | 170 | 95  | 7   | 96  | 2.0 | 87  | 5  | 1.0 |
|               | 150122-01-11 | 401.9         | 116.2 | 3.46 | 0.04833 | 0.00226 | 0.09583 | 0.00434 | 0.01438 | 0.00026 | 0.00408 | 0.00015 | 0.12    | 115  | 106 | 93  | 4   | 92  | 2.0 | 82  | 3  | 1.0 |
|               | 150122-01-12 | 207.0         | 70.6  | 2.93 | 0.04936 | 0.00419 | 0.10902 | 0.00894 | 0.01602 | 0.00042 | 0.00503 | 0.00029 | 0.05    | 165  | 192 | 105 | 8   | 102 | 3.0 | 101 | 6  | 1.0 |
|               | 150122-01-13 | 384.4         | 205.2 | 1.87 | 0.04807 | 0.00250 | 0.10308 | 0.00515 | 0.01556 | 0.00031 | 0.00421 | 0.00025 | 0.09    | 103  | 117 | 100 | 5   | 100 | 2.0 | 85  | 5  | 1.0 |
|               | 150122-01-14 | 199.1         | 92.3  | 2.16 | 0.04792 | 0.00223 | 0.09446 | 0.00428 | 0.01430 | 0.00025 | 0.00405 | 0.00015 | 0.12    | 95   | 105 | 92  | 4   | 92  | 2.0 | 82  | 3  | 1.0 |
|               | 150122-01-15 | 151.1         | 71.2  | 2.12 | 0.04845 | 0.00377 | 0.09668 | 0.00729 | 0.01448 | 0.00034 | 0.00438 | 0.00025 | 0.05    | 121  | 175 | 94  | 7   | 93  | 2.0 | 88  | 5  | 1.0 |
|               | 150122-01-16 | 464.6         | 193.1 | 2.41 | 0.04780 | 0.00163 | 0.09836 | 0.00325 | 0.01493 | 0.00025 | 0.00437 | 0.00017 | 0.19    | 89   | 77  | 95  | 3   | 96  | 2.0 | 88  | 3  | 1.0 |
|               | 150122-01-17 | 136.4         | 49.4  | 2.76 | 0.04814 | 0.00343 | 0.09773 | 0.00680 | 0.01473 | 0.00031 | 0.00438 | 0.00019 | 0.07    | 106  | 160 | 95  | 6   | 94  | 2.0 | 88  | 4  | 1.0 |
|               | 150122-01-18 | 138.9         | 58.2  | 2.38 | 0.04902 | 0.00417 | 0.09856 | 0.00814 | 0.01459 | 0.00036 | 0.00428 | 0.00026 | 0.05    | 149  | 193 | 95  | 8   | 93  | 2.0 | 86  | 5  | 1.0 |
|               | 150122-01-19 | 944.2         | 260.5 | 3.62 | 0.04830 | 0.00261 | 0.10432 | 0.00542 | 0.01567 | 0.00033 | 0.00451 | 0.00033 | 0.10    | 114  | 122 | 101 | 5   | 100 | 2.0 | 91  | 7  | 1.0 |
|               | 150122-01-20 | 304.8         | 143.1 | 2.13 | 0.05020 | 0.00382 | 0.10499 | 0.00769 | 0.01518 | 0.00039 | 0.00543 | 0.00050 | 0.06    | 204  | 174 | 101 | 7   | 97  | 2.0 | 109 | 10 | 1.0 |
|               | I3           | 13106-02zk-01 | 1820  | 573  | 3.18    | 0.04866 | 0.00422 | 0.14537 | 0.01247 | 0.02167 | 0.00053 | 0.00334 | 0.00055 | 0.01 | 131 | 146 | 138 | 11  | 138 | 3.0 | 67 | 11  |
| 13106-02zk-02 |              | 418           | 112   | 3.74 | 0.04778 | 0.01009 | 0.14077 | 0.02957 | 0.02137 | 0.00062 | 0.00436 | 0.00061 | 0.01    | 88   | 328 | 134 | 26  | 136 | 4.0 | 88  | 12 | 1.0 |
| 13106-02zk-03 |              | 572           | 177   | 3.23 | 0.05854 | 0.00550 | 0.18622 | 0.01735 | 0.02307 | 0.00047 | 0.00698 | 0.00160 | 0.01    | 550  | 170 | 173 | 15  | 147 | 3.0 | 141 | 32 | 0.8 |
| 13106-02zk-04 |              | 1960          | 643   | 3.05 | 0.05964 | 0.00273 | 0.16468 | 0.00749 | 0.02003 | 0.00034 | 0.00672 | 0.00187 | 0.01    | 591  | 69  | 155 | 7   | 128 | 2.0 | 135 | 38 | 0.8 |
| 13106-02zk-05 |              | 788           | 314   | 2.51 | 0.05299 | 0.00362 | 0.15927 | 0.01087 | 0.02181 | 0.00041 | 0.00525 | 0.00097 | 0.01    | 328  | 121 | 150 | 10  | 139 | 3.0 | 106 | 20 | 0.9 |
| 13106-02zk-06 |              | 430           | 146   | 2.94 | 0.04518 | 0.00727 | 0.12491 | 0.02002 | 0.02006 | 0.00046 | 0.00421 | 0.00068 | 0.01    | -10  | 248 | 120 | 18  | 128 | 3.0 | 85  | 14 | 1.1 |
| 13106-02zk-07 |              | 174           | 59    | 2.94 | 0.04884 | 0.01623 | 0.13906 | 0.04604 | 0.02065 | 0.00069 | 0.00732 | 0.00182 | 0.01    | 140  | 509 | 132 | 41  | 132 | 4.0 | 147 | 37 | 1.0 |
| 13106-02zk-08 |              | 1738          | 568   | 3.06 | 0.04831 | 0.00209 | 0.13889 | 0.00609 | 0.02086 | 0.00034 | 0.00591 | 0.00124 | 0.01    | 114  | 71  | 132 | 5   | 133 | 2.0 | 119 | 25 | 1.0 |
| 13106-02zk-09 |              | 911           | 230   | 3.96 | 0.05160 | 0.00585 | 0.14887 | 0.01677 | 0.02094 | 0.00048 | 0.00637 | 0.00181 | 0.01    | 268  | 212 | 141 | 15  | 134 | 3.0 | 128 | 36 | 1.0 |
| 13106-02zk-10 |              | 579           | 208   | 2.79 | 0.04106 | 0.00519 | 0.11832 | 0.01492 | 0.02090 | 0.00043 | 0.00486 | 0.00097 | 0.01    | -229 | 184 | 114 | 14  | 133 | 3.0 | 98  | 20 | 1.2 |
| 13106-02zk-11 |              | 1403          | 578   | 2.43 | 0.05133 | 0.00227 | 0.14555 | 0.00650 | 0.02057 | 0.00034 | 0.00608 | 0.00157 | 0.01    | 256  | 72  | 138 | 6   | 131 | 2.0 | 123 | 32 | 0.9 |
| 13106-02zk-12 |              | 169           | 55    | 3.06 | 0.04586 | 0.01607 | 0.13802 | 0.04823 | 0.02183 | 0.00071 | 0.00437 | 0.00089 | 0.01    | -9   | 516 | 131 | 43  | 139 | 4.0 | 88  | 18 | 1.1 |
| 13106-02zk-13 |              | 1017          | 774   | 1.31 | 0.04920 | 0.00191 | 0.14069 | 0.00556 | 0.02075 | 0.00033 | 0.00610 | 0.00170 | 0.01    | 157  | 63  | 134 | 5   | 132 | 2.0 | 123 | 34 | 1.0 |
| 13106-02zk-14 |              | 509           | 130   | 3.93 | 0.04987 | 0.00811 | 0.14971 | 0.02424 | 0.02178 | 0.00053 | 0.00560 | 0.00177 | 0.01    | 189  | 287 | 142 | 21  | 139 | 3.0 | 113 | 36 | 1.0 |
| 13106-02zk-15 |              | 870           | 239   | 3.65 | 0.04894 | 0.00677 | 0.14654 | 0.02010 | 0.02173 | 0.00060 | 0.00297 | 0.00066 | 0.01    | 145  | 247 | 139 | 18  | 139 | 4.0 | 60  | 13 | 1.0 |
| I4            | 1111-01-2-1  | 1926          | 504   | 3.82 | 0.04895 | 0.00237 | 0.12060 | 0.00580 | 0.01788 | 0.00032 | 0.00156 | 0.00009 | 0.17    | 145  | 111 | 116 | 5   | 114 | 2.0 | 32  | 2  | 1.0 |
|               | 1111-01-2-5  | 584           | 154   | 3.79 | 0.07169 | 0.00659 | 0.15982 | 0.01444 | 0.01618 | 0.00039 | 0.00149 | 0.00012 | 0.07    | 977  | 194 | 151 | 13  | 103 | 2.0 | 30  | 2  | 0.7 |
|               | 1111-01-2-6  | 1356          | 325   | 4.17 | 0.05196 | 0.00304 | 0.12735 | 0.00741 | 0.01778 | 0.00031 | 0.00497 | 0.00102 | 0.13    | 284  | 136 | 122 | 7   | 114 | 2.0 | 100 | 21 | 0.9 |
|               | 1111-01-2-2  | 645           | 153   | 4.22 | 0.04842 | 0.00337 | 0.16706 | 0.01162 | 0.02503 | 0.00043 | 0.00360 | 0.00029 | 0.12    | 120  | 156 | 157 | 10  | 159 | 3.0 | 73  | 6  | 1.0 |
|               | 1111-01-2-11 | 570           | 232   | 2.45 | 0.04884 | 0.00251 | 0.18010 | 0.00928 | 0.02676 | 0.00045 | 0.00399 | 0.00041 | 0.17    | 140  | 117 | 168 | 8   | 170 | 3.0 | 80  | 8  | 1.0 |
|               | 1111-01-2-12 | 988           | 236   | 4.19 | 0.05014 | 0.00217 | 0.24948 | 0.01081 | 0.03610 | 0.00062 | 0.00378 | 0.00031 | 0.20    | 201  | 102 | 226 | 9   | 229 | 4.0 | 76  | 6  | 1.0 |
|               | 1111-01-2-7  | 229           | 237   | 0.97 | 0.04576 | 0.00206 | 0.23748 | 0.01070 | 0.03765 | 0.00064 | 0.00368 |         |         |      |     |     |     |     |     |     |    |     |



|    |            |      |      |       |         |         |         |         |           |         |         |         |      |      |     |     |    |     |     |     |    |     |
|----|------------|------|------|-------|---------|---------|---------|---------|-----------|---------|---------|---------|------|------|-----|-----|----|-----|-----|-----|----|-----|
|    | 0125-05-9  | 685  | 119  | 5.76  | 0.06314 | 0.00285 | 0.20293 | 0.00877 | 0.02332   | 0.00044 | 0.00620 | 0.00059 | 0.11 | 713  | 98  | 188 | 7  | 149 | 3.0 | 125 | 12 | 0.8 |
|    | 0125-05-11 | 2378 | 491  | 4.84  | 0.05524 | 0.00124 | 0.18173 | 0.00417 | 0.02386   | 0.00034 | 0.00781 | 0.00058 | 0.35 | 422  | 51  | 170 | 4  | 152 | 2.0 | 157 | 12 | 0.9 |
|    | 0125-05-15 | 302  | 113  | 2.68  | 0.05257 | 0.00206 | 0.17446 | 0.00667 | 0.02407   | 0.00040 | 0.00849 | 0.00073 | 0.16 | 310  | 91  | 163 | 6  | 153 | 3.0 | 171 | 15 | 0.9 |
|    | 0125-05-6  | 797  | 111  | 7.19  | 0.04881 | 0.00213 | 0.16265 | 0.00698 | 0.02416   | 0.00045 | 0.00339 | 0.00017 | 0.18 | 139  | 100 | 153 | 6  | 154 | 3.0 | 68  | 3  | 1.0 |
|    | 0125-05-16 | 915  | 178  | 5.15  | 0.04862 | 0.00118 | 0.16182 | 0.00404 | 0.02414   | 0.00035 | 0.00548 | 0.00025 | 0.34 | 130  | 58  | 152 | 4  | 154 | 2.0 | 110 | 5  | 1.0 |
|    | 0125-05-14 | 849  | 338  | 2.51  | 0.04925 | 0.00166 | 0.16552 | 0.00558 | 0.02438   | 0.00042 | 0.00454 | 0.00029 | 0.26 | 160  | 80  | 156 | 5  | 155 | 3.0 | 92  | 6  | 1.0 |
|    | 0125-05-7  | 561  | 199  | 2.82  | 0.04861 | 0.00127 | 0.16407 | 0.00438 | 0.02446   | 0.00038 | 0.00302 | 0.00013 | 0.33 | 129  | 63  | 154 | 4  | 156 | 2.0 | 61  | 3  | 1.0 |
|    | 0125-05-10 | 333  | 93   | 3.58  | 0.04840 | 0.00191 | 0.16307 | 0.00636 | 0.02443   | 0.00043 | 0.00369 | 0.00022 | 0.20 | 119  | 91  | 153 | 6  | 156 | 3.0 | 74  | 4  | 1.0 |
|    | 0125-05-8  | 670  | 232  | 2.88  | 0.04768 | 0.00152 | 0.16191 | 0.00516 | 0.02461   | 0.00041 | 0.00288 | 0.00017 | 0.26 | 83   | 72  | 152 | 5  | 157 | 3.0 | 58  | 3  | 1.0 |
|    | 0125-05-4  | 1932 | 403  | 4.79  | 0.05035 | 0.00090 | 0.17420 | 0.00338 | 0.02508   | 0.00036 | 0.00424 | 0.00013 | 0.47 | 211  | 42  | 163 | 3  | 160 | 2.0 | 86  | 3  | 1.0 |
|    | 0125-05-20 | 632  | 195  | 3.24  | 0.05085 | 0.00107 | 0.17606 | 0.00389 | 0.02512   | 0.00036 | 0.00500 | 0.00023 | 0.40 | 234  | 50  | 165 | 3  | 160 | 2.0 | 101 | 5  | 1.0 |
|    | 0125-05-19 | 675  | 404  | 6.47  | 0.05112 | 0.00293 | 0.18737 | 0.01046 | 0.02658   | 0.00058 | 0.00375 | 0.00026 | 0.13 | 246  | 133 | 174 | 9  | 169 | 4.0 | 76  | 5  | 1.0 |
| J2 | YA-01-01   | 548  | 252  | 2.18  | 0.04749 | 0.00158 | 0.16788 | 0.00548 | 0.02564   | 0.00038 | 0.00674 | 0.00031 | 0.18 | 74   | 75  | 158 | 5  | 163 | 2.0 | 136 | 6  | 1.0 |
|    | YA-01-02   | 480  | 156  | 3.08  | 0.05074 | 0.00234 | 0.17658 | 0.00794 | 0.02524   | 0.00044 | 0.00682 | 0.00033 | 0.13 | 229  | 109 | 165 | 7  | 161 | 3.0 | 137 | 7  | 1.0 |
|    | YA-01-03   | 601  | 204  | 2.94  | 0.04940 | 0.00123 | 0.17072 | 0.00423 | 0.02507   | 0.00034 | 0.00701 | 0.00032 | 0.26 | 167  | 60  | 160 | 4  | 160 | 2.0 | 141 | 6  | 1.0 |
|    | YA-01-04   | 422  | 363  | 1.16  | 0.05352 | 0.00168 | 0.18651 | 0.00576 | 0.02527   | 0.00037 | 0.00713 | 0.00030 | 0.20 | 351  | 73  | 174 | 5  | 161 | 2.0 | 144 | 6  | 0.9 |
|    | YA-01-05   | 322  | 192  | 1.68  | 0.05554 | 0.00305 | 0.19223 | 0.01015 | 0.02510   | 0.00051 | 0.00720 | 0.00048 | 0.09 | 434  | 126 | 179 | 9  | 160 | 3.0 | 145 | 10 | 0.9 |
|    | YA-01-06   | 244  | 106  | 2.30  | 0.04981 | 0.00262 | 0.17145 | 0.00877 | 0.02496   | 0.00046 | 0.00663 | 0.00037 | 0.10 | 186  | 122 | 161 | 8  | 159 | 3.0 | 134 | 7  | 1.0 |
|    | YA-01-07   | 132  | 41   | 3.20  | 0.05624 | 0.00583 | 0.19320 | 0.01934 | 0.02492   | 0.00076 | 0.00687 | 0.00054 | 0.03 | 462  | 236 | 179 | 16 | 159 | 5.0 | 138 | 11 | 0.9 |
|    | YA-01-08   | 465  | 148  | 3.14  | 0.04880 | 0.00217 | 0.16768 | 0.00726 | 0.02492   | 0.00042 | 0.00711 | 0.00033 | 0.12 | 138  | 102 | 157 | 6  | 159 | 3.0 | 143 | 7  | 1.0 |
|    | YA-01-09   | 339  | 140  | 2.42  | 0.05377 | 0.00200 | 0.18346 | 0.00667 | 0.02474   | 0.00039 | 0.00720 | 0.00033 | 0.16 | 361  | 86  | 171 | 6  | 158 | 2.0 | 145 | 7  | 0.9 |
|    | YA-01-10   | 757  | 296  | 2.56  | 0.05004 | 0.00132 | 0.17282 | 0.00455 | 0.02505   | 0.00035 | 0.00662 | 0.00027 | 0.26 | 197  | 63  | 162 | 4  | 159 | 2.0 | 133 | 5  | 1.0 |
|    | YA-01-11   | 395  | 181  | 2.18  | 0.05395 | 0.00294 | 0.19571 | 0.01027 | 0.02631   | 0.00054 | 0.00769 | 0.00046 | 0.10 | 369  | 126 | 181 | 9  | 167 | 3.0 | 155 | 9  | 0.9 |
|    | YA-01-12   | 779  | 203  | 3.84  | 0.05040 | 0.00150 | 0.17481 | 0.00515 | 0.02516   | 0.00036 | 0.00710 | 0.00029 | 0.22 | 213  | 71  | 164 | 4  | 160 | 2.0 | 143 | 6  | 1.0 |
|    | YA-01-13   | 623  | 192  | 3.25  | 0.05317 | 0.00193 | 0.18291 | 0.00648 | 0.02495   | 0.00039 | 0.00672 | 0.00030 | 0.16 | 336  | 84  | 171 | 6  | 159 | 2.0 | 135 | 6  | 0.9 |
|    | YA-01-14   | 474  | 134  | 3.54  | 0.05005 | 0.00176 | 0.17114 | 0.00593 | 0.02480   | 0.00037 | 0.00697 | 0.00029 | 0.18 | 197  | 84  | 160 | 5  | 158 | 2.0 | 140 | 6  | 1.0 |
|    | YA-01-15   | 678  | 240  | 2.82  | 0.06317 | 0.00220 | 0.21800 | 0.00736 | 0.02503   | 0.00041 | 0.00788 | 0.00035 | 0.18 | 714  | 76  | 200 | 6  | 159 | 3.0 | 159 | 7  | 0.8 |
| J3 | YA02-1     | 1316 | 494  | 2.66  | 0.04918 | 0.00061 | 0.16031 | 0.00226 | 0.02361   | 0.00030 | 0.00320 | 0.00005 | 0.58 | 156  | 30  | 151 | 2  | 150 | 2.0 | 65  | 1  | 1.0 |
|    | YA02-2     | 249  | 102  | 2.43  | 0.04915 | 0.00125 | 0.16093 | 0.00414 | 0.02372   | 0.00033 | 0.00368 | 0.00009 | 0.29 | 155  | 61  | 152 | 4  | 151 | 2.0 | 74  | 2  | 1.0 |
|    | YA02-3     | 512  | 474  | 1.08  | 0.04820 | 0.00061 | 0.15944 | 0.00226 | 0.02398   | 0.00030 | 0.00382 | 0.00007 | 0.56 | 109  | 31  | 150 | 2  | 153 | 2.0 | 77  | 1  | 1.0 |
|    | YA02-4     | 441  | 197  | 2.25  | 0.05186 | 0.00113 | 0.16724 | 0.00373 | 0.02338   | 0.00033 | 0.00356 | 0.00010 | 0.35 | 279  | 51  | 157 | 3  | 149 | 2.0 | 72  | 2  | 0.9 |
|    | YA02-5     | 2927 | 1559 | 1.88  | 0.07485 | 0.00094 | 0.19279 | 0.00263 | 0.01869   | 0.00022 | 0.00513 | 0.00017 | 0.52 | 4064 | 26  | 179 | 2  | 119 | 1.0 | 403 | 3  | 0.7 |
|    | YA02-6     | 479  | 216  | 2.22  | 0.05342 | 0.00119 | 0.17113 | 0.00382 | 0.02324   | 0.00031 | 0.00559 | 0.00024 | 0.30 | 347  | 52  | 160 | 3  | 148 | 2.0 | 113 | 5  | 0.9 |
|    | YA02-7     | 244  | 107  | 2.27  | 0.05016 | 0.00097 | 0.16176 | 0.00324 | 0.02339   | 0.00030 | 0.00502 | 0.00013 | 0.37 | 202  | 46  | 152 | 3  | 149 | 2.0 | 101 | 3  | 1.0 |
|    | YA02-8     | 609  | 202  | 3.02  | 0.05625 | 0.00138 | 0.17937 | 0.00446 | 0.02316   | 0.00034 | 0.00425 | 0.00017 | 0.32 | 462  | 56  | 168 | 4  | 148 | 2.0 | 86  | 3  | 0.9 |
|    | YA02-9     | 374  | 189  | 1.98  | 0.05126 | 0.00106 | 0.16612 | 0.00359 | 0.02352   | 0.00033 | 0.00431 | 0.00014 | 0.39 | 253  | 49  | 156 | 3  | 150 | 2.0 | 87  | 3  | 1.0 |
|    | YA02-10    | 722  | 275  | 2.62  | 0.05454 | 0.00064 | 0.19749 | 0.00686 | 0.06617   | 0.00085 | 0.01229 | 0.00029 | 0.61 | 393  | 27  | 110 | 5  | 113 | 5.0 | 247 | 6  | 1.0 |
|    | YA02-11    | 399  | 132  | 3.02  | 0.05101 | 0.00101 | 0.16770 | 0.00347 | 0.02385   | 0.00032 | 0.00577 | 0.00019 | 0.39 | 241  | 47  | 157 | 3  | 152 | 2.0 | 116 | 4  | 1.0 |
|    | YA02-12    | 526  | 232  | 2.27  | 0.05131 | 0.00091 | 0.16618 | 0.00314 | 0.02350   | 0.00031 | 0.00586 | 0.00024 | 0.43 | 255  | 42  | 156 | 3  | 150 | 2.0 | 118 | 5  | 1.0 |
|    | YA02-13    | 640  | 312  | 2.05  | 0.04846 | 0.00107 | 0.16199 | 0.00380 | 0.02423   | 0.00037 | 0.00314 | 0.00013 | 0.41 | 122  | 53  | 152 | 3  | 154 | 2.0 | 63  | 3  | 1.0 |
|    | YA02-14    | 633  | 228  | 2.77  | 0.05020 | 0.00079 | 0.16494 | 0.00283 | 0.02384   | 0.00031 | 0.00640 | 0.00025 | 0.48 | 204  | 37  | 155 | 2  | 152 | 2.0 | 129 | 5  | 1.0 |
|    | YA02-15    | 255  | 92   | 2.76  | 0.04954 | 0.00113 | 0.16739 | 0.00397 | 0.02451   | 0.00034 | 0.00625 | 0.00026 | 0.36 | 173  | 54  | 157 | 3  | 156 | 2.0 | 126 | 5  | 1.0 |
| J4 | 0125-04-7  | 820  | 294  | 2.79  | 0.05350 | 0.00228 | 0.17394 | 0.00719 | 0.02362   | 0.00048 | 0.00218 | 0.00018 | 0.18 | 350  | 99  | 163 | 6  | 150 | 3.0 | 44  | 4  | 0.9 |
|    | 0125-04-20 | 529  | 161  | 3.29  | 0.05043 | 0.00137 | 0.16331 | 0.00453 | 0.02354   | 0.00038 | 0.00250 | 0.00009 | 0.33 | 215  | 64  | 154 | 4  | 150 | 2.0 | 50  | 2  | 1.0 |
|    | 0125-04-3  | 165  | 56   | 2.92  | 0.05157 | 0.00245 | 0.16814 | 0.00774 | 0.02364   | 0.00042 | 0.00679 | 0.00050 | 0.11 | 266  | 111 | 158 | 7  | 151 | 3.0 | 137 | 10 | 1.0 |
|    | 0125-04-5  | 825  | 271  | 3.05  | 0.04844 | 0.00109 | 0.15911 | 0.00374 | 0.02383   | 0.00036 | 0.00310 | 0.00011 | 0.39 | 121  | 54  | 150 | 3  | 152 | 2.0 | 63  | 2  | 1.0 |
|    | 0125-04-6  | 674  | 138  | 4.88  | 0.05342 | 0.00169 | 0.17547 | 0.00557 | 0.02384   | 0.00041 | 0.00276 | 0.00011 | 0.28 | 347  | 73  | 164 | 5  | 152 | 3.0 | 56  | 2  | 0.9 |
|    | 0125-04-19 | 597  | 214  | 2.79  | 0.05303 | 0.00161 | 0.17455 | 0.00524 | 0.02392   | 0.00037 | 0.00651 | 0.00057 | 0.24 | 330  | 71  | 163 | 5  | 152 | 2.0 | 131 | 11 | 0.9 |
|    | 0125-04-15 | 483  | 35   | 13.73 | 0.05109 | 0.00092 | 0.16913 | 0.03161 | 0.02402   | 0.00134 | 0.00313 | 0.00035 | 0.02 | 245  | 365 | 159 | 27 | 153 | 8.0 | 63  | 7  | 1.0 |
|    | 0125-04-2  | 1243 | 245  | 5.08  | 0.04981 | 0.00095 | 0.16769 | 0.00339 | 0.02443   | 0.00035 | 0.00346 | 0.00009 | 0.43 | 186  | 45  | 157 | 3  | 156 | 2.0 | 70  | 2  | 1.0 |
|    | 0125-04-18 | 650  | 212  | 3.06  | 0.04955 | 0.00159 | 0.16664 | 0.00534 | 0.02451   | 0.00043 | 0.00198 | 0.00008 | 0.27 | 174  | 77  | 156 | 5  | 156 | 3.0 | 40  | 2  | 1.0 |
|    | 0125-04-1  | 303  | 79   | 3.84  | 0.04870 | 0.00189 | 0.16625 | 0.00640 | 0.02476   | 0.00043 | 0.00403 | 0.00015 | 0.21 | 133  | 90  | 156 | 6  | 158 | 3.0 | 81  | 3  | 1.0 |
|    | 0125-04-13 | 1224 | 303  | 4.03  | 0.04722 | 0.00132 | 0.16126 | 0.00460 | 0.02483   | 0.00042 | 0.00232 | 0.00008 | 0.33 | 60   | 62  | 152 | 4  | 158 | 3.0 | 47  | 2  | 1.0 |
|    | 0125-04-17 | 1975 | 332  | 5.94  | 0.04828 | 0.00114 | 0.16514 | 0.00405 | 0.02488   | 0.00040 | 0.00349 | 0.00011 | 0.38 | 113  | 57  | 155 | 4  | 158 | 3.0 | 70  | 2  | 1.0 |
|    | 0125-04-14 | 967  | 342  | 2.83  | 0.04879 | 0.00240 | 0.16793 | 0.00799 | 0.02504   | 0.00054 | 0.00153 | 0.00011 | 0.15 | 138  | 112 | 158 | 7  | 159 | 3.0 | 31  | 2  | 1.0 |
|    | 0125-04-10 | 444  | 203  | 2.19  | 0.04907 | 0.00108 | 0.16972 | 0.00376 | 0.02509   | 0.00033 | 0.00639 | 0.00037 | 0.31 | 151  | 53  | 159 | 3  | 160 | 2.0 | 129 | 7  | 1.0 |
|    | 0125-04-8  | 861  | 349  | 2.47  | 0.05200 | 0.00340 | 0.18197 | 0.01120 | 0.02534</ |         |         |         |      |      |     |     |    |     |     |     |    |     |



|           |           |          |     |      |         |         |         |         |         |         |         |         |         |      |     |     |     |     |     |     |     |     |     |
|-----------|-----------|----------|-----|------|---------|---------|---------|---------|---------|---------|---------|---------|---------|------|-----|-----|-----|-----|-----|-----|-----|-----|-----|
|           | YA-13-02  | 981      | 304 | 3.23 | 0.05115 | 0.00151 | 0.14129 | 0.00410 | 0.02003 | 0.00029 | 0.00522 | 0.00038 | 0.21    | 248  | 70  | 134 | 4   | 128 | 2.0 | 105 | 8   | 1.0 |     |
|           | YA-13-03  | 486      | 212 | 2.29 | 0.04976 | 0.00176 | 0.13753 | 0.00477 | 0.02005 | 0.00031 | 0.00507 | 0.00039 | 0.18    | 184  | 84  | 131 | 4   | 128 | 2.0 | 102 | 8   | 1.0 |     |
|           | YA-13-04  | 126      | 60  | 2.11 | 0.05161 | 0.00344 | 0.14294 | 0.00925 | 0.02009 | 0.00042 | 0.00506 | 0.00047 | 0.07    | 268  | 154 | 136 | 8   | 128 | 3.0 | 102 | 9   | 0.9 |     |
|           | YA-13-05  | 180      | 104 | 1.73 | 0.04966 | 0.00229 | 0.13699 | 0.00616 | 0.02001 | 0.00034 | 0.00516 | 0.00044 | 0.12    | 179  | 107 | 130 | 6   | 128 | 2.0 | 104 | 9   | 1.0 |     |
|           | YA-13-06  | 316      | 142 | 2.22 | 0.04908 | 0.00211 | 0.13555 | 0.00567 | 0.02003 | 0.00033 | 0.00466 | 0.00040 | 0.13    | 152  | 100 | 129 | 5   | 128 | 2.0 | 94  | 8   | 1.0 |     |
|           | YA-13-07  | 339      | 182 | 1.86 | 0.04904 | 0.00188 | 0.13605 | 0.00508 | 0.02012 | 0.00032 | 0.00506 | 0.00044 | 0.15    | 150  | 90  | 130 | 5   | 128 | 2.0 | 102 | 9   | 1.0 |     |
|           | YA-13-08  | 210      | 79  | 2.67 | 0.05020 | 0.00373 | 0.13854 | 0.00998 | 0.02002 | 0.00046 | 0.00492 | 0.00048 | 0.06    | 204  | 170 | 132 | 9   | 128 | 3.0 | 99  | 10  | 1.0 |     |
|           | YA-13-09  | 273      | 127 | 2.15 | 0.04751 | 0.00218 | 0.13078 | 0.00584 | 0.01997 | 0.00034 | 0.00449 | 0.00042 | 0.12    | 75   | 102 | 125 | 5   | 127 | 2.0 | 91  | 8   | 1.0 |     |
|           | YA-13-10  | 498      | 160 | 3.11 | 0.04968 | 0.00197 | 0.13668 | 0.00528 | 0.01995 | 0.00032 | 0.00484 | 0.00045 | 0.14    | 180  | 94  | 130 | 5   | 127 | 2.0 | 98  | 9   | 1.0 |     |
|           | YA-13-11  | 253      | 82  | 3.11 | 0.04873 | 0.00254 | 0.13529 | 0.00688 | 0.02013 | 0.00036 | 0.00430 | 0.00023 | 0.10    | 135  | 119 | 129 | 6   | 128 | 2.0 | 87  | 5   | 1.0 |     |
|           | YA-13-12  | 321      | 191 | 1.68 | 0.04868 | 0.00171 | 0.13447 | 0.00463 | 0.02004 | 0.00030 | 0.00454 | 0.00024 | 0.17    | 132  | 82  | 128 | 4   | 128 | 2.0 | 92  | 5   | 1.0 |     |
|           | YA-13-13  | 238      | 84  | 2.83 | 0.06558 | 0.00271 | 0.17736 | 0.00709 | 0.01962 | 0.00034 | 0.00522 | 0.00029 | 0.14    | 793  | 89  | 166 | 6   | 125 | 2.0 | 105 | 6   | 0.8 |     |
|           | YA-13-14  | 116      | 60  | 1.91 | 0.04300 | 0.00433 | 0.11745 | 0.01153 | 0.01981 | 0.00053 | 0.00515 | 0.00047 | 0.04    | -123 | 180 | 113 | 10  | 126 | 3.0 | 104 | 9   | 1.1 |     |
|           | YA-13-15  | 267      | 90  | 2.97 | 0.04786 | 0.00240 | 0.13197 | 0.00647 | 0.02000 | 0.00034 | 0.00471 | 0.00029 | 0.11    | 92   | 112 | 126 | 6   | 128 | 2.0 | 95  | 6   | 1.0 |     |
|           | YA-13-16  | 214      | 93  | 2.30 | 0.04995 | 0.00221 | 0.13843 | 0.00595 | 0.02010 | 0.00034 | 0.00514 | 0.00034 | 0.12    | 193  | 104 | 132 | 5   | 128 | 2.0 | 104 | 7   | 1.0 |     |
|           | YA-13-17  | 451      | 198 | 2.27 | 0.04339 | 0.00204 | 0.11896 | 0.00546 | 0.01988 | 0.00034 | 0.00505 | 0.00035 | 0.12    | -102 | 103 | 114 | 5   | 127 | 2.0 | 102 | 7   | 1.1 |     |
|           | YA-13-18  | 544      | 124 | 4.38 | 0.05802 | 0.00225 | 0.16004 | 0.00603 | 0.02001 | 0.00033 | 0.00564 | 0.00039 | 0.15    | 531  | 87  | 151 | 5   | 128 | 2.0 | 114 | 8   | 0.8 |     |
|           | YA-13-19  | 241      | 109 | 2.20 | 0.05619 | 0.00220 | 0.15220 | 0.00579 | 0.01965 | 0.00032 | 0.00648 | 0.00050 | 0.14    | 460  | 89  | 144 | 5   | 125 | 2.0 | 131 | 10  | 0.9 |     |
|           | YA-13-20  | 276      | 99  | 2.78 | 0.04715 | 0.00240 | 0.12925 | 0.00639 | 0.01988 | 0.00035 | 0.00574 | 0.00048 | 0.09    | 57   | 112 | 123 | 6   | 127 | 2.0 | 116 | 10  | 1.0 |     |
| J7        | YA-04A-12 | 248      | 72  | 3.46 | 0.04741 | 0.00276 | 0.12651 | 0.00731 | 0.01935 | 0.00044 | 0.00545 | 0.00036 | 0.18    | 70   | 129 | 121 | 7   | 124 | 3.0 | 110 | 7   | 1.0 |     |
|           | YA-04A-9  | 229      | 66  | 3.47 | 0.04803 | 0.00397 | 0.13065 | 0.01061 | 0.01973 | 0.00056 | 0.00492 | 0.00041 | 0.12    | 101  | 186 | 125 | 10  | 126 | 4.0 | 99  | 8   | 1.0 |     |
|           | YA-04A-11 | 283      | 59  | 4.79 | 0.04810 | 0.00337 | 0.13343 | 0.00926 | 0.02012 | 0.00050 | 0.00548 | 0.00036 | 0.15    | 104  | 157 | 127 | 8   | 128 | 3.0 | 110 | 7   | 1.0 |     |
|           | YA-04A-1  | 276      | 96  | 2.88 | 0.05037 | 0.00265 | 0.14043 | 0.00729 | 0.02022 | 0.00046 | 0.00596 | 0.00048 | 0.19    | 212  | 122 | 133 | 6   | 129 | 3.0 | 120 | 10  | 1.0 |     |
|           | YA-04A-10 | 1019     | 463 | 2.20 | 0.04863 | 0.00108 | 0.13630 | 0.00331 | 0.02033 | 0.00040 | 0.00313 | 0.00017 | 0.51    | 130  | 53  | 130 | 3   | 130 | 3.0 | 63  | 3   | 1.0 |     |
|           | YA-04A-14 | 259      | 59  | 4.38 | 0.04928 | 0.00414 | 0.14317 | 0.01187 | 0.02107 | 0.00066 | 0.00387 | 0.00030 | 0.15    | 161  | 190 | 136 | 11  | 134 | 4.0 | 78  | 6   | 1.0 |     |
|           | YA-04A-2  | 588      | 232 | 2.54 | 0.04902 | 0.00133 | 0.14306 | 0.00422 | 0.02117 | 0.00046 | 0.00410 | 0.00019 | 0.47    | 149  | 65  | 136 | 4   | 135 | 3.0 | 83  | 4   | 1.0 |     |
|           | YA-04A-8  | 136      | 42  | 3.24 | 0.04944 | 0.00729 | 0.14443 | 0.02065 | 0.02119 | 0.00099 | 0.00257 | 0.00026 | 0.07    | 169  | 296 | 137 | 18  | 135 | 6.0 | 52  | 5   | 1.0 |     |
|           | YA-04A-3  | 516      | 146 | 3.53 | 0.04744 | 0.00191 | 0.13996 | 0.00582 | 0.02140 | 0.00051 | 0.00384 | 0.00020 | 0.34    | 71   | 89  | 133 | 5   | 136 | 3.0 | 77  | 4   | 1.0 |     |
|           | YA-04A-6  | 345      | 98  | 3.50 | 0.04870 | 0.00203 | 0.14321 | 0.00608 | 0.02133 | 0.00048 | 0.00483 | 0.00021 | 0.30    | 133  | 96  | 136 | 5   | 136 | 3.0 | 97  | 4   | 1.0 |     |
|           | YA-04A-15 | 325      | 122 | 2.65 | 0.05031 | 0.00229 | 0.14760 | 0.00684 | 0.02128 | 0.00053 | 0.00442 | 0.00031 | 0.30    | 209  | 107 | 140 | 6   | 136 | 3.0 | 89  | 6   | 1.0 |     |
|           | YA-04A-7  | 399      | 202 | 1.97 | 0.04886 | 0.00169 | 0.14456 | 0.00519 | 0.02146 | 0.00047 | 0.00554 | 0.00030 | 0.36    | 141  | 81  | 137 | 5   | 137 | 3.0 | 112 | 6   | 1.0 |     |
|           | YA-04A-5  | 566      | 196 | 2.88 | 0.04863 | 0.00229 | 0.14580 | 0.00698 | 0.02174 | 0.00057 | 0.00333 | 0.00025 | 0.30    | 130  | 107 | 138 | 6   | 139 | 4.0 | 67  | 5   | 1.0 |     |
|           | YA-04A-4  | 194      | 61  | 3.20 | 0.05102 | 0.00469 | 0.15833 | 0.01427 | 0.02251 | 0.00075 | 0.00285 | 0.00026 | 0.13    | 242  | 210 | 149 | 13  | 143 | 5.0 | 58  | 5   | 1.0 |     |
|           | YA-04A-13 | 322      | 180 | 1.79 | 0.04816 | 0.00133 | 0.15205 | 0.00445 | 0.02290 | 0.00048 | 0.00388 | 0.00016 | 0.43    | 107  | 65  | 144 | 4   | 146 | 3.0 | 78  | 3   | 1.0 |     |
|           | J8        | YA-04B-1 | 591 | 119  | 4.98    | 0.05405 | 0.00183 | 0.16495 | 0.00586 | 0.02213 | 0.00050 | 0.00493 | 0.00020 | 0.39 | 373 | 78  | 155 | 5   | 141 | 3.0 | 99  | 4   | 0.9 |
|           |           | YA-04B-2 | 151 | 39   | 3.84    | 0.05007 | 0.00483 | 0.15663 | 0.01482 | 0.02269 | 0.00077 | 0.00506 | 0.00038 | 0.12 | 198 | 220 | 148 | 13  | 145 | 5.0 | 102 | 8   | 1.0 |
| YA-04B-3  |           | 469      | 156 | 3.02 | 0.05230 | 0.00179 | 0.16298 | 0.00578 | 0.02260 | 0.00050 | 0.00629 | 0.00033 | 0.37    | 299  | 80  | 153 | 5   | 144 | 3.0 | 127 | 7   | 0.9 |     |
| YA-04B-4  |           | 635      | 185 | 3.43 | 0.04918 | 0.00205 | 0.15422 | 0.00670 | 0.02274 | 0.00059 | 0.00325 | 0.00017 | 0.37    | 156  | 97  | 146 | 6   | 145 | 4.0 | 66  | 3   | 1.0 |     |
| YA-04B-5  |           | 390      | 136 | 2.87 | 0.05013 | 0.00221 | 0.15709 | 0.00705 | 0.02273 | 0.00055 | 0.00574 | 0.00039 | 0.30    | 201  | 104 | 148 | 6   | 145 | 3.0 | 116 | 8   | 1.0 |     |
| YA-04B-6  |           | 928      | 187 | 4.96 | 0.04925 | 0.00202 | 0.17265 | 0.00738 | 0.02543 | 0.00066 | 0.00318 | 0.00017 | 0.37    | 160  | 96  | 162 | 6   | 162 | 4.0 | 64  | 3   | 1.0 |     |
| YA-04B-7  |           | 507      | 175 | 2.90 | 0.06179 | 0.00269 | 0.16388 | 0.00711 | 0.01923 | 0.00046 | 0.00674 | 0.00063 | 0.27    | 667  | 96  | 154 | 6   | 123 | 3.0 | 136 | 13  | 0.8 |     |
| YA-04B-8  |           | 588      | 209 | 2.81 | 0.04945 | 0.00173 | 0.15428 | 0.00572 | 0.02263 | 0.00056 | 0.00321 | 0.00017 | 0.42    | 169  | 83  | 146 | 5   | 144 | 4.0 | 65  | 3   | 1.0 |     |
| YA-04B-9  |           | 289      | 74  | 3.90 | 0.05175 | 0.00303 | 0.15676 | 0.00913 | 0.02197 | 0.00056 | 0.00528 | 0.00042 | 0.21    | 274  | 136 | 148 | 8   | 140 | 4.0 | 106 | 8   | 0.9 |     |
| YA-04B-10 |           | 217      | 83  | 2.60 | 0.04901 | 0.00284 | 0.15297 | 0.00882 | 0.02264 | 0.00056 | 0.00588 | 0.00051 | 0.20    | 148  | 132 | 145 | 8   | 144 | 4.0 | 118 | 10  | 1.0 |     |
| YA-04B-11 |           | 613      | 135 | 4.55 | 0.04922 | 0.00173 | 0.15080 | 0.00550 | 0.02222 | 0.00049 | 0.00509 | 0.00021 | 0.36    | 158  | 84  | 143 | 5   | 142 | 3.0 | 103 | 4   | 1.0 |     |
| YA-04B-12 |           | 231      | 55  | 4.19 | 0.05183 | 0.00274 | 0.17196 | 0.00914 | 0.02406 | 0.00059 | 0.00455 | 0.00019 | 0.24    | 278  | 124 | 161 | 8   | 153 | 4.0 | 92  | 4   | 1.0 |     |
| YA-04B-13 |           | 796      | 149 | 5.33 | 0.04977 | 0.00172 | 0.15243 | 0.00553 | 0.02221 | 0.00051 | 0.00373 | 0.00014 | 0.39    | 184  | 82  | 144 | 5   | 142 | 3.0 | 75  | 3   | 1.0 |     |
| YA        |           |          |     |      |         |         |         |         |         |         |         |         |         |      |     |     |     |     |     |     |     |     |     |



|           |     |     |      |         |         |         |         |         |         |         |         |     |    |     |     |     |    |     |
|-----------|-----|-----|------|---------|---------|---------|---------|---------|---------|---------|---------|-----|----|-----|-----|-----|----|-----|
| wys-01-16 | 172 | 143 | 1.20 | 0.04834 | 0.00542 | 0.14159 | 0.01563 | 0.02125 | 0.00055 | 0.00688 | 0.00127 | 134 | 14 | 136 | 3.0 | 139 | 25 | 1.0 |
| wys-01-17 | 179 | 158 | 1.10 | 0.04886 | 0.00376 | 0.14710 | 0.01121 | 0.02183 | 0.00043 | 0.00719 | 0.00102 | 139 | 10 | 139 | 3.0 | 145 | 20 | 1.0 |
| wys-01-18 | 246 | 165 | 1.50 | 0.04846 | 0.00650 | 0.13341 | 0.01752 | 0.01997 | 0.00063 | 0.00699 | 0.00184 | 127 | 16 | 127 | 4.0 | 141 | 37 | 1.0 |
| wys-01-19 | 260 | 246 | 1.10 | 0.04875 | 0.00276 | 0.13876 | 0.00778 | 0.02065 | 0.00036 | 0.00599 | 0.00086 | 132 | 7  | 132 | 2.0 | 121 | 17 | 1.0 |
| wys-02-01 | 773 | 307 | 2.50 | 0.04890 | 0.00273 | 0.12371 | 0.00673 | 0.01832 | 0.00037 | 0.00466 | 0.00039 | 118 | 6  | 117 | 2.0 | 94  | 8  | 1.0 |
| wys-02-02 | 257 | 195 | 1.30 | 0.04703 | 0.00274 | 0.11731 | 0.00670 | 0.01811 | 0.00036 | 0.00430 | 0.00030 | 113 | 6  | 116 | 2.0 | 87  | 6  | 1.0 |
| wys-02-04 | 215 | 117 | 1.80 | 0.04774 | 0.00470 | 0.12649 | 0.01211 | 0.01924 | 0.00054 | 0.00460 | 0.00045 | 121 | 11 | 123 | 3.0 | 93  | 9  | 1.0 |
| wys-02-05 | 180 | 114 | 1.60 | 0.04905 | 0.00294 | 0.14233 | 0.00835 | 0.02104 | 0.00040 | 0.00626 | 0.00047 | 135 | 7  | 134 | 3.0 | 126 | 9  | 1.0 |
| wys-02-06 | 317 | 315 | 1.00 | 0.04851 | 0.00244 | 0.13687 | 0.00674 | 0.02049 | 0.00041 | 0.00431 | 0.00037 | 130 | 6  | 131 | 3.0 | 87  | 7  | 1.0 |
| wys-02-08 | 767 | 636 | 1.20 | 0.04825 | 0.00149 | 0.14910 | 0.00456 | 0.02241 | 0.00034 | 0.00612 | 0.00062 | 141 | 4  | 143 | 2.0 | 123 | 42 | 1.0 |
| wys-02-10 | 573 | 152 | 3.80 | 0.04851 | 0.00375 | 0.13020 | 0.00977 | 0.01947 | 0.00046 | 0.00574 | 0.00086 | 124 | 9  | 124 | 3.0 | 116 | 17 | 1.0 |
| wys-02-11 | 314 | 275 | 1.10 | 0.04821 | 0.00222 | 0.14140 | 0.00641 | 0.02128 | 0.00039 | 0.00489 | 0.00036 | 134 | 6  | 136 | 2.0 | 99  | 7  | 1.0 |
| wys-02-13 | 100 | 98  | 1.00 | 0.05002 | 0.00714 | 0.14501 | 0.02010 | 0.02102 | 0.00084 | 0.00247 | 0.00036 | 137 | 18 | 134 | 5.0 | 50  | 7  | 1.0 |
| wys-02-14 | 217 | 141 | 1.50 | 0.04937 | 0.00253 | 0.13218 | 0.00668 | 0.01942 | 0.00034 | 0.00503 | 0.00038 | 126 | 6  | 124 | 2.0 | 101 | 8  | 1.0 |
| wys-02-15 | 288 | 230 | 1.30 | 0.04873 | 0.00178 | 0.13340 | 0.00482 | 0.01986 | 0.00031 | 0.00492 | 0.00039 | 127 | 4  | 127 | 2.0 | 99  | 8  | 1.0 |

M20, Baiyashan, Tainian (Liu et al., 2016)

|          |      |      |      |         |         |         |         |         |         |         |         |     |     |     |    |     |     |     |     |     |
|----------|------|------|------|---------|---------|---------|---------|---------|---------|---------|---------|-----|-----|-----|----|-----|-----|-----|-----|-----|
| SMS20-01 | 805  | 741  | 1.09 | 0.04755 | 0.00398 | 0.10295 | 0.00852 | 0.01570 | 0.00039 | 0.00298 | 0.00063 | 77  | 188 | 99  | 8  | 100 | 2.0 | 60  | 13  | 1.0 |
| SMS20-02 | 3411 | 1242 | 2.75 | 0.04894 | 0.00147 | 0.10482 | 0.00330 | 0.01553 | 0.00026 | 0.00406 | 0.00072 | 145 | 72  | 101 | 3  | 99  | 2.0 | 82  | 14  | 1.0 |
| SMS20-03 | 3099 | 1247 | 2.49 | 0.04840 | 0.00152 | 0.10267 | 0.00335 | 0.01538 | 0.00026 | 0.00460 | 0.00092 | 119 | 74  | 99  | 3  | 98  | 2.0 | 93  | 19  | 1.0 |
| SMS20-04 | 1175 | 1038 | 1.13 | 0.04852 | 0.00288 | 0.10590 | 0.00625 | 0.01583 | 0.00035 | 0.00248 | 0.00045 | 125 | 134 | 102 | 6  | 101 | 2.0 | 50  | 9   | 1.0 |
| SMS20-05 | 958  | 431  | 2.22 | 0.04953 | 0.00486 | 0.10616 | 0.01024 | 0.01555 | 0.00039 | 0.00534 | 0.00033 | 173 | 223 | 102 | 9  | 99  | 2.0 | 108 | 47  | 1.0 |
| SMS20-06 | 620  | 238  | 2.64 | 0.04956 | 0.00693 | 0.14106 | 0.01939 | 0.02064 | 0.00065 | 0.00943 | 0.00565 | 174 | 286 | 134 | 17 | 132 | 4.0 | 190 | 113 | 1.0 |
| SMS20-07 | 140  | 142  | 0.99 | 0.04769 | 0.01344 | 0.10368 | 0.02896 | 0.01577 | 0.00066 | 0.00454 | 0.00134 | 84  | 469 | 100 | 27 | 101 | 4.0 | 92  | 27  | 1.0 |
| SMS20-08 | 365  | 369  | 0.99 | 0.04754 | 0.00358 | 0.10377 | 0.00780 | 0.01583 | 0.00031 | 0.00440 | 0.00106 | 76  | 168 | 100 | 7  | 101 | 2.0 | 89  | 21  | 1.0 |
| SMS20-09 | 309  | 197  | 1.57 | 0.04866 | 0.00702 | 0.10192 | 0.01460 | 0.01519 | 0.00038 | 0.00517 | 0.00177 | 131 | 289 | 99  | 13 | 97  | 2.0 | 104 | 36  | 1.0 |
| SMS20-10 | 1368 | 643  | 2.13 | 0.04832 | 0.00240 | 0.10510 | 0.00525 | 0.01577 | 0.00028 | 0.00484 | 0.00134 | 115 | 112 | 101 | 5  | 101 | 2.0 | 98  | 27  | 1.0 |
| SMS20-11 | 854  | 479  | 1.78 | 0.04914 | 0.00404 | 0.10743 | 0.00871 | 0.01586 | 0.00036 | 0.00474 | 0.00178 | 155 | 186 | 104 | 8  | 101 | 2.0 | 96  | 36  | 1.0 |

M21, Jishan and Xiadu villages, Yong'an (Two samples js-jch and js-09 below are cited from Hu et al., 2011, and other four samples from Liu et al., 2016)

|           |      |      |       |         |         |         |         |         |         |         |         |     |    |     |     |     |    |     |
|-----------|------|------|-------|---------|---------|---------|---------|---------|---------|---------|---------|-----|----|-----|-----|-----|----|-----|
| js-jch-01 | 199  | 79   | 2.50  | 0.04884 | 0.00373 | 0.16601 | 0.01243 | 0.02466 | 0.00060 | 0.00691 | 0.00048 | 156 | 11 | 157 | 4.0 | 139 | 10 | 1.0 |
| js-jch-02 | 515  | 303  | 1.70  | 0.04961 | 0.00220 | 0.14606 | 0.00631 | 0.02136 | 0.00038 | 0.00637 | 0.00060 | 138 | 6  | 136 | 2.0 | 128 | 12 | 1.0 |
| js-jch-04 | 671  | 356  | 1.90  | 0.05032 | 0.00134 | 0.16886 | 0.00451 | 0.02434 | 0.00036 | 0.00703 | 0.00047 | 158 | 4  | 155 | 2.0 | 142 | 9  | 1.0 |
| js-jch-05 | 270  | 259  | 1.00  | 0.04924 | 0.00163 | 0.17688 | 0.00593 | 0.02606 | 0.00045 | 0.00710 | 0.00050 | 165 | 5  | 166 | 3.0 | 143 | 10 | 1.0 |
| js-jch-08 | 245  | 199  | 1.20  | 0.05196 | 0.00186 | 0.18938 | 0.00679 | 0.02643 | 0.00047 | 0.00764 | 0.00065 | 176 | 6  | 168 | 3.0 | 154 | 13 | 1.0 |
| js-jch-09 | 393  | 241  | 1.60  | 0.05174 | 0.00211 | 0.18380 | 0.00751 | 0.02577 | 0.00051 | 0.00602 | 0.00060 | 171 | 6  | 164 | 3.0 | 121 | 12 | 1.0 |
| js-jch-11 | 386  | 405  | 1.00  | 0.04912 | 0.00115 | 0.15937 | 0.00380 | 0.02353 | 0.00034 | 0.00545 | 0.00028 | 150 | 3  | 150 | 2.0 | 110 | 6  | 1.0 |
| js-jch-12 | 669  | 459  | 1.50  | 0.04846 | 0.00123 | 0.13799 | 0.00349 | 0.02066 | 0.00029 | 0.00530 | 0.00032 | 131 | 3  | 132 | 2.0 | 107 | 6  | 1.0 |
| js-jch-13 | 180  | 164  | 1.10  | 0.04997 | 0.00227 | 0.15928 | 0.00705 | 0.02312 | 0.00040 | 0.00666 | 0.00056 | 150 | 6  | 147 | 3.0 | 134 | 11 | 1.0 |
| js-jch-14 | 215  | 162  | 1.30  | 0.04939 | 0.00202 | 0.16990 | 0.00684 | 0.02496 | 0.00041 | 0.00638 | 0.00042 | 159 | 6  | 159 | 3.0 | 129 | 8  | 1.0 |
| js-jch-17 | 125  | 120  | 1.00  | 0.04942 | 0.00302 | 0.15275 | 0.00910 | 0.02244 | 0.00045 | 0.00556 | 0.00048 | 144 | 8  | 143 | 3.0 | 112 | 10 | 1.0 |
| js-jch-18 | 259  | 201  | 1.30  | 0.05015 | 0.00206 | 0.14564 | 0.00584 | 0.02107 | 0.00035 | 0.00511 | 0.00042 | 138 | 5  | 134 | 2.0 | 103 | 8  | 1.0 |
| js-jch-19 | 136  | 154  | 0.90  | 0.05016 | 0.00208 | 0.15968 | 0.00640 | 0.02309 | 0.00037 | 0.00627 | 0.00060 | 150 | 6  | 147 | 2.0 | 126 | 12 | 1.0 |
| js-jch-21 | 296  | 329  | 0.90  | 0.05064 | 0.00158 | 0.15899 | 0.00491 | 0.02278 | 0.00033 | 0.00674 | 0.00053 | 150 | 4  | 145 | 2.0 | 136 | 11 | 1.0 |
| js-jch-22 | 200  | 198  | 1.00  | 0.04839 | 0.00209 | 0.15323 | 0.00655 | 0.02297 | 0.00038 | 0.00660 | 0.00045 | 145 | 6  | 146 | 2.0 | 133 | 9  | 1.0 |
| js-jch-23 | 478  | 314  | 1.50  | 0.05069 | 0.00148 | 0.16087 | 0.00470 | 0.02302 | 0.00034 | 0.00686 | 0.00047 | 151 | 4  | 147 | 2.0 | 138 | 9  | 1.0 |
| js-jch-24 | 223  | 160  | 1.40  | 0.05097 | 0.00237 | 0.16284 | 0.00743 | 0.02318 | 0.00040 | 0.00676 | 0.00053 | 153 | 6  | 148 | 3.0 | 136 | 11 | 1.0 |
| js-jch-25 | 313  | 266  | 1.20  | 0.04942 | 0.00159 | 0.15029 | 0.00482 | 0.02206 | 0.00033 | 0.00646 | 0.00045 | 142 | 4  | 141 | 2.0 | 130 | 9  | 1.0 |
| js-jch-26 | 394  | 357  | 1.10  | 0.04980 | 0.00128 | 0.17051 | 0.00443 | 0.02483 | 0.00035 | 0.00666 | 0.00046 | 160 | 4  | 158 | 2.0 | 134 | 9  | 1.0 |
| js-jch-27 | 77   | 42   | 1.80  | 0.04935 | 0.00618 | 0.16386 | 0.02025 | 0.02408 | 0.00061 | 0.00530 | 0.00045 | 154 | 18 | 153 | 4.0 | 107 | 9  | 1.0 |
| js-jch-28 | 162  | 151  | 1.10  | 0.04967 | 0.00218 | 0.16603 | 0.00722 | 0.02425 | 0.00040 | 0.00643 | 0.00051 | 156 | 6  | 154 | 3.0 | 130 | 10 | 1.0 |
| js-09-01  | 140  | 96   | 1.50  | 0.04963 | 0.00454 | 0.14027 | 0.01250 | 0.02050 | 0.00051 | 0.00675 | 0.00073 | 133 | 11 | 131 | 3.0 | 136 | 15 | 1.0 |
| js-09-05  | 113  | 101  | 1.10  | 0.04983 | 0.00302 | 0.15353 | 0.00911 | 0.02235 | 0.00042 | 0.00843 | 0.00082 | 145 | 8  | 142 | 3.0 | 170 | 16 | 1.0 |
| js-09-06  | 163  | 205  | 0.80  | 0.04892 | 0.00218 | 0.15124 | 0.00668 | 0.02243 | 0.00040 | 0.00450 | 0.00034 | 143 | 6  | 143 | 3.0 | 91  | 7  | 1.0 |
| js-09-08  | 57   | 52   | 1.10  | 0.04806 | 0.00745 | 0.15149 | 0.02304 | 0.02287 | 0.00077 | 0.00701 | 0.00131 | 143 | 20 | 146 | 5.0 | 141 | 26 | 1.0 |
| js-09-11  | 300  | 168  | 1.80  | 0.04955 | 0.00217 | 0.15708 | 0.00684 | 0.02299 | 0.00038 | 0.00678 | 0.00043 | 148 | 6  | 147 | 2.0 | 137 | 9  | 1.0 |
| js-09-12  | 265  | 174  | 1.50  | 0.04819 | 0.00237 | 0.16098 | 0.00782 | 0.02423 | 0.00042 | 0.00682 | 0.00053 | 152 | 7  | 154 | 3.0 | 137 | 11 | 1.0 |
| js-09-13  | 234  | 171  | 1.40  | 0.04820 | 0.00293 | 0.14277 | 0.00851 | 0.02148 | 0.00041 | 0.00656 | 0.00066 | 136 | 8  | 137 | 3.0 | 132 | 13 | 1.0 |
| js-09-14  | 255  | 153  | 1.70  | 0.05028 | 0.00409 | 0.18163 | 0.01431 | 0.02620 | 0.00065 | 0.00736 | 0.00125 | 169 | 12 | 167 | 4.0 | 148 | 25 | 1.0 |
| js-09-16  | 342  | 247  | 1.40  | 0.04807 | 0.00193 | 0.14871 | 0.00592 | 0.02244 | 0.00037 | 0.00573 | 0.00047 | 141 | 5  | 143 | 2.0 | 115 | 9  | 1.0 |
| js-09-17  | 228  | 220  | 1.00  | 0.04931 | 0.00150 | 0.17133 | 0.00525 | 0.02520 | 0.00036 | 0.00660 | 0.00049 | 161 | 5  | 160 | 2.0 | 133 | 10 | 1.0 |
| js-09-18  | 130  | 113  | 1.20  | 0.04873 | 0.00252 | 0.17364 | 0.00889 | 0.02584 | 0.00043 | 0.00734 | 0.00064 | 163 | 8  | 164 | 3.0 | 148 | 13 | 1.0 |
| js-09-20  | 245  | 230  | 1.10  | 0.04932 | 0.00182 | 0.16989 | 0.00622 | 0.02498 | 0.00040 | 0.00541 | 0.00044 | 159 | 5  | 159 | 3.0 | 109 | 9  | 1.0 |
| js-09-22  | 360  | 393  | 0.90  | 0.04868 | 0.00165 | 0.15511 | 0.00519 | 0.02311 | 0.00035 | 0.00700 | 0.00064 | 146 | 5  | 147 | 2.0 | 141 | 13 | 1.0 |
| js-09-23  | 1116 | 842  | ##### | 0.05021 | 0.00102 | 0.15778 | 0.00332 | 0.02279 | 0.00031 | 0.00737 | 0.00052 | 149 | 3  | 145 | 2.0 | 148 | 10 | 1.0 |
| js-09-24  | 644  | 459  | 1.40  | 0.04882 | 0.00150 | 0.16498 | 0.00507 | 0.02451 | 0.00038 | 0.00671 | 0.00057 | 155 | 4  | 156 | 2.0 | 135 | 11 | 1.0 |
| js-09-25  | 923  | 1095 | 95.00 | 0.04955 | 0.00099 | 0.16735 | 0.00354 | 0.02450 | 0.00035 | 0.00603 | 0.00043 | 157 | 3  | 156 | 2.0 | 122 | 9  | 1.0 |



|         |     |     |      |         |         |         |         |         |         |         |         |      |      |      |    |      |      |      |     |     |
|---------|-----|-----|------|---------|---------|---------|---------|---------|---------|---------|---------|------|------|------|----|------|------|------|-----|-----|
| NY36-01 | 909 | 362 | 2.51 | 0.04722 | 0.01626 | 0.13722 | 0.04647 | 0.02110 | 0.00141 | 0.00125 | 0.00071 | 60   | 566  | 131  | 41 | 135  | 9.0  | 25   | 14  | 1.0 |
| NY36-02 | 387 | 211 | 1.84 | 0.04873 | 0.00672 | 0.14353 | 0.01971 | 0.02136 | 0.00048 | 0.00274 | 0.00056 | 135  | 276  | 136  | 18 | 136  | 3.0  | 55   | 11  | 1.0 |
| NY36-03 | 262 | 135 | 1.94 | 0.04915 | 0.02921 | 0.14466 | 0.08524 | 0.02134 | 0.00170 | 0.01357 | 0.03463 | 155  | 967  | 137  | 76 | 136  | 11.0 | 272  | 691 | 1.0 |
| NY36-04 | 240 | 165 | 1.46 | 0.04878 | 0.00956 | 0.14040 | 0.02737 | 0.02087 | 0.00057 | 0.00333 | 0.00120 | 137  | 353  | 133  | 24 | 133  | 4.0  | 67   | 24  | 1.0 |
| NY36-05 | 582 | 284 | 2.05 | 0.05034 | 0.01348 | 0.14730 | 0.03873 | 0.02122 | 0.00124 | 0.00082 | 0.00023 | 211  | 474  | 140  | 34 | 135  | 8.0  | 17   | 5   | 1.0 |
| NY36-06 | 408 | 254 | 1.61 | 0.04662 | 0.01133 | 0.13751 | 0.03302 | 0.02143 | 0.00092 | 0.00152 | 0.00052 | 30   | 401  | 131  | 29 | 137  | 6.0  | 31   | 10  | 1.0 |
| NY36-07 | 560 | 258 | 2.17 | 0.04846 | 0.00756 | 0.14299 | 0.02210 | 0.02139 | 0.00059 | 0.00700 | 0.00451 | 122  | 294  | 136  | 20 | 136  | 4.0  | 141  | 91  | 1.0 |
| NY36-08 | 217 | 154 | 1.41 | 0.04880 | 0.00942 | 0.14159 | 0.02722 | 0.02104 | 0.00055 | 0.00496 | 0.00186 | 138  | 350  | 134  | 24 | 134  | 3.0  | 100  | 37  | 1.0 |
| NY36-09 | 302 | 133 | 2.27 | 0.04926 | 0.01628 | 0.14545 | 0.04772 | 0.02141 | 0.00095 | 0.00610 | 0.00570 | 160  | 563  | 138  | 42 | 137  | 6.0  | 123  | 115 | 1.0 |
| NY36-10 | 354 | 240 | 1.48 | 0.04874 | 0.01061 | 0.14299 | 0.03077 | 0.02126 | 0.00078 | 0.00599 | 0.00593 | 135  | 387  | 136  | 27 | 136  | 5.0  | 121  | 119 | 1.0 |
| NY36-11 | 399 | 700 | 0.57 | 0.11067 | 0.00206 | 4.72312 | 0.10032 | 0.30953 | 0.00481 | 0.04975 | 0.01083 | 1810 | 35   | 1771 | 18 | 1738 | 24.0 | 981  | 209 | 1.0 |
| NY36-12 | 236 | 86  | 2.75 | 0.04819 | 0.01543 | 0.15414 | 0.04918 | 0.02320 | 0.00075 | 0.00560 | 0.00148 | 109  | 537  | 146  | 43 | 148  | 5.0  | 113  | 30  | 1.0 |
| NY36-13 | 211 | 124 | 1.7  | 0.04994 | 0.01746 | 0.14506 | 0.05043 | 0.02106 | 0.00088 | 0.00527 | 0.00274 | 192  | 603  | 138  | 45 | 134  | 6.0  | 106  | 55  | 1.0 |
| NY36-14 | 505 | 305 | 1.65 | 0.04849 | 0.00592 | 0.14290 | 0.01736 | 0.02137 | 0.00049 | 0.00320 | 0.00080 | 123  | 253  | 136  | 15 | 136  | 3.0  | 65   | 16  | 1.0 |
| NY36-15 | 456 | 231 | 1.98 | 0.04880 | 0.00693 | 0.14400 | 0.02037 | 0.02140 | 0.00050 | 0.00655 | 0.00298 | 138  | 285  | 137  | 18 | 136  | 3.0  | 132  | 60  | 1.0 |
| NY36-16 | 243 | 126 | 1.93 | 0.04937 | 0.02744 | 0.14427 | 0.07963 | 0.02119 | 0.00147 | 0.00853 | 0.01765 | 165  | 968  | 137  | 71 | 135  | 9.0  | 172  | 354 | 1.0 |
| NY36-17 | 234 | 121 | 1.93 | 0.04680 | 0.02836 | 0.13779 | 0.08292 | 0.02144 | 0.00160 | 0.00585 | 0.00938 | 39   | 965  | 131  | 74 | 137  | 10.0 | 118  | 188 | 1.0 |
| NY36-18 | 265 | 126 | 2.1  | 0.04882 | 0.02071 | 0.14289 | 0.06022 | 0.02124 | 0.00109 | 0.01354 | 0.02554 | 139  | 726  | 136  | 54 | 135  | 7.0  | 272  | 509 | 1.0 |
| NY36-19 | 486 | 289 | 1.68 | 0.04915 | 0.01231 | 0.14239 | 0.03526 | 0.02101 | 0.00090 | 0.00846 | 0.01569 | 155  | 438  | 135  | 31 | 134  | 6.0  | 170  | 314 | 1.0 |
| NY36-20 | 528 | 364 | 1.45 | 0.04804 | 0.00555 | 0.13934 | 0.01600 | 0.02104 | 0.00049 | 0.00489 | 0.00252 | 101  | 244  | 132  | 14 | 134  | 3.0  | 99   | 51  | 1.0 |
| NY36-21 | 211 | 152 | 1.38 | 0.04836 | 0.02258 | 0.14111 | 0.06532 | 0.02120 | 0.00134 | 0.02619 | 0.16067 | 117  | 810  | 134  | 58 | 135  | 8.0  | 523  | ### | 1.0 |
|         |     |     |      |         |         |         |         |         |         |         |         |      |      |      |    |      |      |      |     |     |
| NY37-01 | 318 | 112 | 2.83 | 0.04864 | 0.01401 | 0.13954 | 0.04004 | 0.02081 | 0.00068 | 0.00304 | 0.00068 | 131  | 483  | 133  | 36 | 133  | 4.0  | 61   | 14  | 1.0 |
| NY37-02 | 341 | 137 | 2.48 | 0.04881 | 0.01456 | 0.13870 | 0.04116 | 0.02061 | 0.00075 | 0.01815 | 0.02608 | 139  | 503  | 132  | 37 | 132  | 5.0  | 364  | 518 | 1.0 |
| NY37-03 | 206 | 97  | 2.12 | 0.04816 | 0.02600 | 0.13644 | 0.07325 | 0.02055 | 0.00123 | 0.00719 | 0.00573 | 107  | 941  | 130  | 65 | 131  | 8.0  | 145  | 115 | 1.0 |
| NY37-04 | 274 | 117 | 2.33 | 0.04797 | 0.02139 | 0.13836 | 0.06130 | 0.02091 | 0.00113 | 0.00144 | 0.00040 | 98   | 763  | 132  | 55 | 133  | 7.0  | 29   | 8   | 1.0 |
| NY37-05 | 243 | 168 | 1.45 | 0.05077 | 0.02395 | 0.14311 | 0.06694 | 0.02047 | 0.00131 | 0.00484 | 0.00347 | 230  | 844  | 136  | 59 | 131  | 8.0  | 98   | 70  | 1.0 |
| NY37-06 | 622 | 284 | 2.19 | 0.04969 | 0.01243 | 0.14074 | 0.03487 | 0.02056 | 0.00082 | 0.00837 | 0.01011 | 181  | 441  | 134  | 31 | 131  | 5.0  | 168  | 203 | 1.0 |
| NY37-07 | 196 | 93  | 2.1  | 0.04748 | 0.02519 | 0.13429 | 0.07089 | 0.02051 | 0.00119 | 0.00094 | 0.00025 | 73   | 913  | 128  | 63 | 131  | 8.0  | 19   | 5   | 1.0 |
| NY37-08 | 284 | 127 | 2.24 | 0.04896 | 0.01366 | 0.13922 | 0.03866 | 0.02062 | 0.00067 | 0.00322 | 0.00102 | 146  | 475  | 132  | 34 | 132  | 4.0  | 65   | 21  | 1.0 |
| NY37-09 | 152 | 78  | 1.96 | 0.04808 | 0.01950 | 0.13790 | 0.05575 | 0.02080 | 0.00080 | 0.00410 | 0.00128 | 103  | 683  | 131  | 50 | 133  | 5.0  | 83   | 26  | 1.0 |
| NY37-10 | 224 | 104 | 2.16 | 0.04821 | 0.01582 | 0.13797 | 0.04514 | 0.02076 | 0.00068 | 0.00363 | 0.00130 | 110  | 550  | 131  | 40 | 132  | 4.0  | 73   | 26  | 1.0 |
| NY37-11 | 202 | 111 | 1.83 | 0.04930 | 0.01403 | 0.14241 | 0.04038 | 0.02095 | 0.00064 | 0.00344 | 0.00079 | 162  | 486  | 135  | 36 | 134  | 4.0  | 69   | 16  | 1.0 |
| NY37-12 | 358 | 177 | 2.02 | 0.04913 | 0.01650 | 0.14420 | 0.04809 | 0.02129 | 0.00096 | 0.00577 | 0.00403 | 154  | 573  | 137  | 43 | 136  | 6.0  | 116  | 81  | 1.0 |
| NY37-13 | 199 | 84  | 2.36 | 0.04885 | 0.02304 | 0.14011 | 0.06578 | 0.02081 | 0.00102 | 0.00566 | 0.00292 | 141  | 825  | 133  | 59 | 133  | 6.0  | 114  | 59  | 1.0 |
| NY37-14 | 345 | 153 | 2.25 | 0.04882 | 0.01368 | 0.13782 | 0.03841 | 0.02048 | 0.00073 | 0.00208 | 0.00049 | 139  | 475  | 131  | 34 | 131  | 5.0  | 42   | 10  | 1.0 |
| NY37-15 | 284 | 147 | 1.93 | 0.04858 | 0.01161 | 0.13788 | 0.03282 | 0.02059 | 0.00059 | 0.00507 | 0.00210 | 128  | 416  | 131  | 29 | 131  | 4.0  | 102  | 42  | 1.0 |
| NY37-16 | 195 | 82  | 2.37 | 0.04942 | 0.03967 | 0.13799 | 0.11020 | 0.02026 | 0.00170 | #####   | 0.04504 | 168  | 1104 | 131  | 98 | 129  | 11.0 | -385 | 928 | 1.0 |
| NY37-17 | 423 | 190 | 2.23 | 0.04962 | 0.01156 | 0.14146 | 0.03275 | 0.02068 | 0.00068 | 0.00563 | 0.00316 | 177  | 414  | 134  | 29 | 132  | 4.0  | 113  | 64  | 1.0 |
| NY37-18 | 375 | 171 | 2.19 | 0.04859 | 0.01063 | 0.14124 | 0.03073 | 0.02109 | 0.00063 | 0.00622 | 0.00347 | 128  | 385  | 134  | 27 | 135  | 4.0  | 125  | 70  | 1.0 |
| NY37-19 | 365 | 139 | 2.63 | 0.04881 | 0.01223 | 0.14178 | 0.03538 | 0.02107 | 0.00064 | 0.00556 | 0.00251 | 139  | 435  | 135  | 31 | 134  | 4.0  | 112  | 50  | 1.0 |
| NY37-20 | 237 | 129 | 1.84 | 0.04783 | 0.02412 | 0.13487 | 0.06759 | 0.02045 | 0.00120 | #####   | 0.04067 | 91   | 860  | 128  | 60 | 130  | 8.0  | -354 | 837 | 1.0 |
| NY37-21 | 320 | 164 | 1.95 | 0.04859 | 0.00976 | 0.13726 | 0.02746 | 0.02049 | 0.00053 | 0.00633 | 0.00332 | 128  | 358  | 131  | 25 | 131  | 3.0  | 128  | 67  | 1.0 |
| NY37-22 | 369 | 153 | 2.42 | 0.04792 | 0.01592 | 0.13912 | 0.04587 | 0.02105 | 0.00095 | 0.00262 | 0.00121 | 95   | 553  | 132  | 41 | 134  | 6.0  | 53   | 24  | 1.0 |
|         |     |     |      |         |         |         |         |         |         |         |         |      |      |      |    |      |      |      |     |     |
| NY38-02 | 591 | 293 | 2.02 | 0.04766 | 0.02181 | 0.10350 | 0.04678 | 0.01571 | 0.00118 | 0.00067 | 0.00030 | 71   | 1109 | 95   | 70 | 96   | 9.0  | 13   | 5   | 1.0 |
| NY38-03 | 535 | 114 | 4.7  | 0.04773 | 0.02077 | 0.10155 | 0.04401 | 0.01543 | 0.00067 | 0.00330 | 0.00113 | 131  | 1018 | 99   | 59 | 98   | 6.0  | 103  | 68  | 1.0 |
| NY38-04 | 320 | 130 | 2.46 | 0.04743 | 0.03686 | 0.09851 | 0.07603 | 0.01505 | 0.00141 | 0.00066 | 0.00023 | 99   | 153  | 98   | 6  | 98   | 2.0  | 75   | 31  | 1.0 |
| NY38-05 | 538 | 277 | 1.94 | 0.04892 | 0.00755 | 0.14082 | 0.02161 | 0.02089 | 0.00055 | 0.00292 | 0.00080 | 86   | 739  | 98   | 41 | 99   | 4.0  | 67   | 23  | 1.0 |
| NY38-06 | 379 | 99  |      |         |         |         |         |         |         |         |         |      |      |      |    |      |      |      |     |     |



|         |     |     |      |         |         |         |         |         |         |         |         |     |     |     |    |     |     |    |    |     |
|---------|-----|-----|------|---------|---------|---------|---------|---------|---------|---------|---------|-----|-----|-----|----|-----|-----|----|----|-----|
| NY39-18 | 309 | 172 | 1.79 | 0.04900 | 0.01320 | 0.10550 | 0.02826 | 0.01562 | 0.00055 | 0.00291 | 0.00070 | 148 | 460 | 102 | 26 | 100 | 3.0 | 59 | 14 | 1.0 |
| NY39-19 | 758 | 294 | 2.58 | 0.04778 | 0.00655 | 0.09904 | 0.01352 | 0.01504 | 0.00034 | 0.00346 | 0.00082 | 88  | 274 | 96  | 12 | 96  | 2.0 | 70 | 17 | 1.0 |
| NY39-20 | 177 | 82  | 2.14 | 0.04794 | 0.02846 | 0.10237 | 0.06052 | 0.01549 | 0.00092 | 0.00142 | 0.00035 | 96  | 974 | 99  | 56 | 99  | 6.0 | 29 | 7  | 1.0 |

M22, Zijinshan and Shanghang, SW Fujian (Jiang et al., 2013, 2015)

|           |     |     |      |         |         |         |         |         |         |  |  |      |      |       |     |       |     |  |  |     |
|-----------|-----|-----|------|---------|---------|---------|---------|---------|---------|--|--|------|------|-------|-----|-------|-----|--|--|-----|
| ZJ10-7-1  | 101 | 180 | 0.56 | 0.04807 | 0.00107 | 0.11459 | 0.00346 | 0.01714 | 0.00012 |  |  | 102  | 67.6 | 109.9 | 2.4 | 109.1 | 0.7 |  |  | 1.0 |
| ZJ10-7-2  | 102 | 181 | 0.56 | 0.048   | 0.00106 | 0.11429 | 0.00345 | 0.01712 | 0.00012 |  |  | 98.2 | 47.2 | 109.9 | 3.1 | 109.4 | 0.7 |  |  | 1.0 |
| ZJ10-7-3  | 77  | 51  | 1.52 | 0.04899 | 0.00099 | 0.13648 | 0.0028  | 0.02026 | 0.00012 |  |  | 102  | 49.1 | 110.2 | 3.2 | 109.5 | 0.7 |  |  | 1.0 |
| ZJ10-7-4  | 198 | 139 | 1.43 | 0.04839 | 0.00122 | 0.11747 | 0.00308 | 0.01759 | 0.0001  |  |  | 98.2 | 25   | 110.5 | 1.9 | 110.4 | 0.8 |  |  | 1.0 |
| ZJ10-7-5  | 247 | 416 | 0.59 | 0.04799 | 0.00058 | 0.11499 | 0.00205 | 0.01728 | 0.00012 |  |  | 121  | 23.1 | 110.6 | 1.2 | 110.4 | 0.6 |  |  | 1.0 |
| ZJ10-7-6  | 151 | 227 | 0.66 | 0.05556 | 0.00081 | 0.55187 | 0.01477 | 0.07155 | 0.00121 |  |  | 87.1 | 33.3 | 110.7 | 4.3 | 110.9 | 1.8 |  |  | 1.0 |
| ZJ10-7-7  | 144 | 193 | 0.75 | 0.04806 | 0.00072 | 0.1143  | 0.00263 | 0.01707 | 0.0001  |  |  | 117  | 59.3 | 112.8 | 2.8 | 112.4 | 0.6 |  |  | 1.0 |
| ZJ10-7-8  | 202 | 194 | 1.04 | 0.0484  | 0.00058 | 0.11505 | 0.00135 | 0.01727 | 0.00009 |  |  | 146  | 48.1 | 129.9 | 2.5 | 129.3 | 0.8 |  |  | 1.0 |
| ZJ10-7-9  | 30  | 85  | 0.36 | 0.05039 | 0.00163 | 0.15833 | 0.00321 | 0.02336 | 0.00019 |  |  | 1499 | 859  | 135.2 | 4.6 | 134.1 | 2.2 |  |  | 1.0 |
| ZJ10-7-10 | 339 | 497 | 0.68 | 0.04775 | 0.00066 | 0.11516 | 0.0047  | 0.01735 | 0.00029 |  |  | 213  | 43.5 | 149.2 | 2.8 | 148.9 | 1.2 |  |  | 1.0 |
| ZJ10-7-11 | 357 | 392 | 0.91 | 0.09354 | 0.03857 | 0.14247 | 0.00522 | 0.02101 | 0.00035 |  |  | 165  | 25.9 | 160.6 | 3.3 | 159.3 | 1.9 |  |  | 1.0 |
| ZJ10-7-12 | 14  | 203 | 0.07 | 0.04936 | 0.00056 | 0.1714  | 0.00375 | 0.02502 | 0.0003  |  |  | 309  | 11.1 | 376.4 | 2.3 | 387.4 | 1.9 |  |  | 1.0 |
| ZJ10-7-13 | 102 | 76  | 1.36 | 0.07126 | 0.00028 | 1.59523 | 0.01164 | 0.16237 | 0.00101 |  |  | 435  | 5.6  | 446.2 | 9.7 | 445.5 | 7.3 |  |  | 1.0 |
| ZJ10-7-14 | 228 | 166 | 1.37 | 0.05255 | 0.00026 | 0.44879 | 0.00324 | 0.06193 | 0.00032 |  |  | 965  | 2.8  | 968.3 | 4.6 | 969.9 | 5.6 |  |  | 1.0 |

|            |      |      |      |         |         |         |         |         |         |  |  |      |      |       |     |       |     |  |  |     |
|------------|------|------|------|---------|---------|---------|---------|---------|---------|--|--|------|------|-------|-----|-------|-----|--|--|-----|
| ZJ10-12-1  | 223  | 851  | 0.26 | 0.04781 | 0.00022 | 0.1122  | 0.00117 | 0.01702 | 0.00016 |  |  | 100  | 11.1 | 108   | 1.1 | 108.8 | 1.0 |  |  | 1.0 |
| ZJ10-12-2  | 305  | 873  | 0.35 | 0.04859 | 0.0009  | 0.11814 | 0.00244 | 0.01764 | 0.00019 |  |  | 200  | 9.3  | 110.2 | 0.5 | 109   | 0.4 |  |  | 1.0 |
| ZJ10-12-3  | 164  | 774  | 0.21 | 0.04674 | 0.00031 | 0.11009 | 0.00173 | 0.01708 | 0.00023 |  |  | 35.3 | 14.8 | 106   | 1.6 | 109.2 | 1.5 |  |  | 1.0 |
| ZJ10-12-4  | 572  | 1345 | 0.43 | 0.04821 | 0.00017 | 0.11505 | 0.00093 | 0.01731 | 0.00012 |  |  | 109  | 12   | 109.3 | 0.5 | 109.3 | 0.3 |  |  | 1.0 |
| ZJ10-12-5  | 252  | 848  | 0.3  | 0.05134 | 0.00019 | 0.17947 | 0.00327 | 0.02532 | 0.0004  |  |  | 102  | 61.1 | 109.2 | 2   | 109.5 | 1.8 |  |  | 1.0 |
| ZJ10-12-6  | 323  | 1290 | 0.25 | 0.04926 | 0.00033 | 0.11648 | 0.00268 | 0.01715 | 0.00038 |  |  | 167  | 14.8 | 111.9 | 2.4 | 109.6 | 2.4 |  |  | 1.0 |
| ZJ10-12-7  | 106  | 369  | 0.29 | 0.04717 | 0.00029 | 0.11391 | 0.00114 | 0.01751 | 0.00014 |  |  | 200  | 14.8 | 111.6 | 2.9 | 110.3 | 3.0 |  |  | 1.0 |
| ZJ10-12-8  | 214  | 574  | 0.37 | 0.0499  | 0.0003  | 0.1186  | 0.00207 | 0.01731 | 0.00037 |  |  | 109  | 7.4  | 110.6 | 0.8 | 110.6 | 0.8 |  |  | 1.0 |
| ZJ10-12-9  | 287  | 842  | 0.34 | 0.04799 | 0.00029 | 0.11459 | 0.00159 | 0.01731 | 0.0002  |  |  | 191  | 17.6 | 113.8 | 1.9 | 110.6 | 2.3 |  |  | 1.0 |
| ZJ10-12-10 | 137  | 300  | 0.46 | 0.05536 | 0.00021 | 0.52571 | 0.00568 | 0.06888 | 0.0007  |  |  | 98.2 | 19.4 | 110.2 | 1.4 | 110.6 | 1.2 |  |  | 1.0 |
| ZJ10-12-11 | 287  | 899  | 0.32 | 0.04879 | 0.00031 | 0.11614 | 0.00323 | 0.01726 | 0.00048 |  |  | 55.7 | 42.6 | 108.6 | 3   | 111.3 | 1.5 |  |  | 1.0 |
| ZJ10-12-12 | 357  | 1056 | 0.34 | 0.04806 | 0.00066 | 0.1135  | 0.00223 | 0.01714 | 0.00029 |  |  | 94.5 | 65.7 | 110.7 | 2   | 111.6 | 1.6 |  |  | 1.0 |
| ZJ10-12-13 | 174  | 718  | 0.24 | 0.04699 | 0.00101 | 0.11287 | 0.00334 | 0.01741 | 0.00024 |  |  | 57.5 | 14.8 | 109.5 | 1   | 111.9 | 0.9 |  |  | 1.0 |
| ZJ10-12-14 | 114  | 448  | 0.25 | 0.04834 | 0.00035 | 0.11952 | 0.00133 | 0.01793 | 0.00014 |  |  | 128  | 44.4 | 113.4 | 2.2 | 112.7 | 1.2 |  |  | 1.0 |
| ZJ10-12-15 | 520  | 978  | 0.53 | 0.04829 | 0.00017 | 0.11824 | 0.00056 | 0.01776 | 0.00007 |  |  | 402  | 4.6  | 112.3 | 0.5 | 112.9 | 0.4 |  |  | 1.0 |
| ZJ10-12-16 | 252  | 883  | 0.29 | 0.04791 | 0.00141 | 0.11519 | 0.0022  | 0.01747 | 0.00026 |  |  | 122  | 7.4  | 113.5 | 0.5 | 113.5 | 0.4 |  |  | 1.0 |
| ZJ10-12-17 | 310  | 1052 | 0.3  | 0.04817 | 0.00016 | 0.1136  | 0.00052 | 0.01711 | 0.00005 |  |  | 122  | 16.7 | 114.6 | 1.2 | 114.5 | 0.9 |  |  | 1.0 |
| ZJ10-12-18 | 1669 | 1412 | 1.18 | 0.04804 | 0.00018 | 0.11696 | 0.0006  | 0.01766 | 0.00006 |  |  | 258  | 4.6  | 167.6 | 2.8 | 161.2 | 2.5 |  |  | 1.0 |
| ZJ10-12-19 | 340  | 1120 | 0.3  | 0.04879 | 0.00017 | 0.11467 | 0.00056 | 0.01705 | 0.00006 |  |  | 428  | 9.3  | 429   | 3.8 | 429.4 | 4.2 |  |  | 1.0 |

|            |     |     |      |         |         |         |         |         |         |  |  |      |      |       |     |       |     |  |  |     |
|------------|-----|-----|------|---------|---------|---------|---------|---------|---------|--|--|------|------|-------|-----|-------|-----|--|--|-----|
| ZJ10-16-1  | 125 | 55  | 2.27 | 0.04793 | 0.00101 | 0.10917 | 0.00299 | 0.01643 | 0.00013 |  |  | 94.5 | 45.4 | 105.2 | 2.7 | 105   | 0.8 |  |  | 1.0 |
| ZJ10-16-2  | 95  | 34  | 2.8  | 0.10457 | 0.00431 | 0.28912 | 0.01492 | 0.01902 | 0.00021 |  |  | 1707 | 75.9 | 257.9 | 12  | 121.5 | 1.4 |  |  | 0.5 |
| ZJ10-16-3  | 67  | 36  | 1.89 | 0.04832 | 0.00142 | 0.11082 | 0.00388 | 0.01656 | 0.00014 |  |  | 122  | 70.4 | 106.7 | 3.5 | 105.9 | 0.9 |  |  | 1.0 |
| ZJ10-16-4  | 94  | 44  | 2.11 | 0.04756 | 0.00142 | 0.11016 | 0.00357 | 0.01684 | 0.00026 |  |  | 76   | -127 | 106.1 | 3.3 | 107.7 | 1.6 |  |  | 1.0 |
| ZJ10-16-5  | 589 | 320 | 1.84 | 0.04607 | 0.00062 | 0.10932 | 0.00662 | 0.01657 | 0.0004  |  |  | 400  | -365 | 105.3 | 6.1 | 105.9 | 2.5 |  |  | 1.0 |
| ZJ10-16-6  | 164 | 56  | 2.9  | 0.04851 | 0.00101 | 0.11105 | 0.00231 | 0.01666 | 0.00012 |  |  | 124  | 48.1 | 106.9 | 2.1 | 106.5 | 0.8 |  |  | 1.0 |
| ZJ10-16-7  | 121 | 106 | 1.14 | 0.04829 | 0.00092 | 0.11317 | 0.0033  | 0.01683 | 0.00014 |  |  | 122  | 44.4 | 108.9 | 3   | 107.6 | 0.9 |  |  | 1.0 |
| ZJ10-16-8  | 132 | 62  | 2.13 | 0.04844 | 0.0013  | 0.11288 | 0.00372 | 0.01678 | 0.00012 |  |  | 121  | 63   | 108.6 | 3.4 | 107.3 | 0.8 |  |  | 1.0 |
| ZJ10-16-9  | 534 | 446 | 1.2  | 0.05185 | 0.0048  | 0.11387 | 0.01011 | 0.01642 | 0.0004  |  |  | 280  | 215  | 109.5 | 9.2 | 105   | 2.6 |  |  | 1.0 |
| ZJ10-16-10 | 129 | 34  | 3.83 | 0.04858 | 0.00104 | 0.10909 | 0.0026  | 0.01628 | 0.00011 |  |  | 128  | 50   | 105.1 | 2.4 | 104.1 | 0.7 |  |  | 1.0 |
| ZJ10-16-11 | 57  | 27  | 2.13 | 0.04823 | 0.00177 | 0.10813 | 0.0045  | 0.01617 | 0.00012 |  |  | 109  | 87   | 104.3 | 4.1 | 103.4 | 0.8 |  |  | 1.0 |
| ZJ10-16-12 | 84  | 39  | 2.15 | 0.04853 | 0.00111 | 0.11045 | 0.00273 | 0.01652 | 0.00011 |  |  | 124  | 55.6 | 106.4 | 2.5 | 105.6 | 0.7 |  |  | 1.0 |
| ZJ10-16-13 | 189 | 78  | 2.43 | 0.05064 | 0.00061 | 0.11351 | 0.00153 | 0.01626 | 0.00009 |  |  | 233  | 29.6 | 109.2 | 1.4 | 104   | 0.6 |  |  | 1.0 |
| ZJ10-16-14 | 132 | 70  | 1.88 | 0.04843 | 0.00115 | 0.10997 | 0.00389 | 0.01622 | 0.00011 |  |  | 121  | 55.6 | 105.9 | 3.6 | 103.7 | 0.7 |  |  | 1.0 |
| ZJ10-16-15 | 151 | 116 | 1.3  | 0.04836 | 0.00311 | 0.11207 | 0.00916 | 0.01664 | 0.00033 |  |  | 117  | 144  | 107.9 | 8.4 | 106.4 | 2.1 |  |  | 1.0 |
| ZJ10-16-16 | 47  | 25  | 1.9  | 0.04878 | 0.00139 | 0.11087 | 0.0043  | 0.01632 | 0.00017 |  |  | 200  | 66.7 | 106.8 | 3.9 | 104.3 | 1.1 |  |  | 1.0 |
| ZJ10-16-17 | 467 | 513 | 0.91 | 0.04767 | 0.00065 | 0.11062 | 0.00501 | 0.01633 | 0.0003  |  |  | 83.4 | 36.1 | 106.5 | 4.6 | 104.4 | 1.9 |  |  | 1.0 |
| ZJ10-16-18 | 59  | 42  | 1.39 | 0.04854 | 0.00091 | 0.11151 | 0.00237 | 0.01663 | 0.00012 |  |  | 124  | 44.4 | 107.4 | 2.2 | 106.3 | 0.7 |  |  | 1.0 |

ZJ10-21 Data unavailbe

|            |      |      |      |         |         |         |         |         |         |      |      |       |     |       |     |     |
|------------|------|------|------|---------|---------|---------|---------|---------|---------|------|------|-------|-----|-------|-----|-----|
| ZJ10-22-1  | 283  | 166  | 1.7  | 0.04815 | 0.00089 | 0.10469 | 0.00238 | 0.01579 | 0.00027 | 189  | 59.2 | 103.3 | 3.2 | 99    | 1.3 | 1.0 |
| ZJ10-22-2  | 578  | 265  | 2.18 | 0.04835 | 0.00104 | 0.10475 | 0.00282 | 0.01563 | 0.00023 | 117  | 50   | 101.2 | 2.6 | 100   | 1.5 | 1.0 |
| ZJ10-22-3  | 430  | 273  | 1.57 | 0.0497  | 0.00124 | 0.10706 | 0.0035  | 0.01547 | 0.00021 | 122  | 15.7 | 100.9 | 2.1 | 100   | 1.4 | 1.0 |
| ZJ10-22-4  | 562  | 572  | 0.98 | 0.04881 | 0.00112 | 0.10763 | 0.00429 | 0.01565 | 0.00022 | 139  | 53.7 | 103.8 | 3.9 | 100.1 | 1.4 | 1.0 |
| ZJ10-22-5  | 354  | 113  | 3.13 | 0.04819 | 0.00103 | 0.10434 | 0.00232 | 0.01575 | 0.00017 | 109  | 54.6 | 100.8 | 2.1 | 100.7 | 1.1 | 1.0 |
| ZJ10-22-6  | 553  | 210  | 2.63 | 0.04828 | 0.00078 | 0.10642 | 0.00192 | 0.01599 | 0.00014 | 106  | 44.4 | 101.1 | 2.2 | 101   | 1.7 | 1.0 |
| ZJ10-22-7  | 161  | 97   | 1.65 | 0.04746 | 0.00212 | 0.10468 | 0.00518 | 0.01592 | 0.00014 | 154  | 36.1 | 105.9 | 4.3 | 101   | 1.1 | 1.0 |
| ZJ10-22-8  | 251  | 123  | 2.03 | 0.04824 | 0.00132 | 0.1066  | 0.003   | 0.01603 | 0.00013 | 117  | 22.2 | 101.9 | 1.4 | 101.1 | 0.7 | 1.0 |
| ZJ10-22-9  | 100  | 87   | 1.15 | 0.04795 | 0.00178 | 0.1065  | 0.00396 | 0.01617 | 0.00021 | 102  | 4.6  | 101.4 | 0.5 | 101.4 | 0.5 | 1.0 |
| ZJ10-22-10 | 275  | 147  | 1.87 | 0.04902 | 0.00173 | 0.10827 | 0.00377 | 0.01605 | 0.00015 | 72.3 | 104  | 101.1 | 4.8 | 101.8 | 0.9 | 1.0 |
| ZJ10-22-11 | 522  | 427  | 1.22 | 0.04809 | 0.00067 | 0.10622 | 0.0015  | 0.01605 | 0.0001  | 76   | 19.4 | 101.7 | 2.4 | 101.9 | 1.5 | 1.0 |
| ZJ10-22-12 | 469  | 212  | 2.21 | 0.0489  | 0.00073 | 0.10819 | 0.00168 | 0.01607 | 0.00012 | 122  | 38.9 | 102.7 | 1.8 | 102.2 | 0.9 | 1.0 |
| ZJ10-22-13 | 410  | 326  | 1.26 | 0.04802 | 0.00044 | 0.10574 | 0.00115 | 0.016   | 0.00013 | 98.2 | 20.4 | 102.1 | 1.1 | 102.3 | 0.8 | 1.0 |
| ZJ10-22-14 | 369  | 171  | 2.16 | 0.05022 | 0.00086 | 0.1107  | 0.0021  | 0.016   | 0.00017 | 206  | 38.9 | 106.6 | 1.9 | 102.3 | 1.1 | 1.0 |
| ZJ10-22-15 | 2588 | 2091 | 1.24 | 0.04825 | 0.00042 | 0.10446 | 0.00225 | 0.01564 | 0.00021 | 109  | 60.2 | 102.9 | 2.8 | 102.5 | 0.8 | 1.0 |
| ZJ10-22-16 | 1444 | 1244 | 1.16 | 0.0491  | 0.00085 | 0.10996 | 0.00472 | 0.0158  | 0.00017 | 106  | 61.1 | 102.5 | 1.4 | 102.6 | 0.6 | 1.0 |
| ZJ10-22-17 | 575  | 568  | 1.01 | 0.04835 | 0.00045 | 0.10561 | 0.00153 | 0.0158  | 0.00011 | 150  | 81.5 | 104.4 | 3.5 | 102.7 | 1.0 | 1.0 |
| ZJ10-22-18 | 314  | 181  | 1.73 | 0.04939 | 0.00091 | 0.10895 | 0.0019  | 0.01608 | 0.00012 | 143  | 33.3 | 104.3 | 1.5 | 102.7 | 0.7 | 1.0 |
| ZJ10-22-19 | 1415 | 1261 | 1.12 | 0.04754 | 0.00029 | 0.10535 | 0.00258 | 0.01593 | 0.00024 | 165  | 42.6 | 105   | 1.7 | 102.8 | 0.8 | 1.0 |
| ZJ10-22-20 | 1977 | 1524 | 1.3  | 0.04802 | 0.00016 | 0.10498 | 0.00059 | 0.01586 | 0.00008 | 98.2 | 88.9 | 102.8 | 3.6 | 103.4 | 1.3 | 1.0 |



|            |        |       |      |         |         |         |         |         |         |      |      |       |     |       |      |     |
|------------|--------|-------|------|---------|---------|---------|---------|---------|---------|------|------|-------|-----|-------|------|-----|
| ZJ10-23-2  | 204    | 552   | 0.37 | 0.04807 | 0.00069 | 0.11431 | 0.00386 | 0.01695 | 0.00019 | 102  | 61.1 | 109.9 | 3.5 | 108.4 | 1.2  | 1.0 |
| ZJ10-23-3  | 214    | 740   | 0.29 | 0.04806 | 0.00046 | 0.11208 | 0.00235 | 0.01679 | 0.00019 | 102  | 22.2 | 107.9 | 2.1 | 107.3 | 1.2  | 1.0 |
| ZJ10-23-4  | 228    | 581   | 0.39 | 0.04755 | 0.00063 | 0.1123  | 0.00387 | 0.01682 | 0.0002  | 76   | 26.9 | 108.1 | 3.5 | 107.6 | 1.3  | 1.0 |
| ZJ10-23-5  | 136    | 409   | 0.33 | 0.04755 | 0.00059 | 0.11092 | 0.00295 | 0.01674 | 0.00018 | 76   | 25   | 106.8 | 2.7 | 107   | 1.1  | 1.0 |
| ZJ10-23-6  | 262    | 502   | 0.52 | 0.04704 | 0.00037 | 0.1099  | 0.002   | 0.01686 | 0.00018 | 50.1 | 23.1 | 105.9 | 1.8 | 107.8 | 1.1  | 1.0 |
| ZJ10-23-7  | 189    | 505   | 0.38 | 0.04796 | 0.00099 | 0.11268 | 0.00334 | 0.0169  | 0.00018 | 98.2 | 45.4 | 108.4 | 3.1 | 108   | 1.2  | 1.0 |
| ZJ10-23-8  | 182    | 528   | 0.34 | 0.04719 | 0.00063 | 0.11081 | 0.00402 | 0.01669 | 0.00023 | 57.5 | 33.3 | 106.7 | 3.7 | 106.7 | 1.5  | 1.0 |
| ZJ10-23-9  | 64     | 269   | 0.24 | 0.04824 | 0.00068 | 0.11133 | 0.00262 | 0.0166  | 0.00013 | 109  | 33.3 | 107.2 | 2.4 | 106.1 | 0.8  | 1.0 |
| ZJ10-23-10 | 259    | 674   | 0.38 | 0.0484  | 0.00122 | 0.11378 | 0.00584 | 0.01658 | 0.00025 | 121  | 59.3 | 109.4 | 5.3 | 106   | 1.6  | 1.0 |
| ZJ10-23-11 | 180    | 609   | 0.3  | 0.04679 | 0.00087 | 0.11053 | 0.00322 | 0.01698 | 0.00018 | 39   | 44.4 | 106.4 | 2.9 | 108.5 | 1.2  | 1.0 |
| ZJ10-23-12 | 362    | 703   | 0.51 | 0.04684 | 0.00054 | 0.11066 | 0.00355 | 0.01688 | 0.00021 | 42.7 | 32.4 | 106.6 | 3.2 | 107.9 | 1.3  | 1.0 |
| ZJ10-23-13 | 111    | 529   | 0.21 | 0.04799 | 0.00065 | 0.11242 | 0.00274 | 0.01684 | 0.00018 | 98.2 | 33.3 | 108.2 | 2.5 | 107.7 | 1.1  | 1.0 |
| ZJ10-23-14 | 126    | 343   | 0.37 | 0.04717 | 0.00092 | 0.11104 | 0.00392 | 0.01682 | 0.00018 | 57.5 | 46.3 | 106.9 | 3.6 | 107.5 | 1.2  | 1.0 |
| ZJ10-23-15 | 231    | 806   | 0.29 | 0.04705 | 0.00038 | 0.11157 | 0.00401 | 0.01694 | 0.00031 | 50.1 | 23.1 | 107.4 | 3.7 | 108.3 | 2.0  | 1.0 |
| ZJ10-23-16 | 262    | 718   | 0.36 | 0.04744 | 0.00071 | 0.11217 | 0.00387 | 0.01686 | 0.00022 | 77.9 | 35.2 | 107.9 | 3.5 | 107.8 | 1.4  | 1.0 |
| ZJ10-23-17 | 177    | 509   | 0.35 | 0.04755 | 0.00055 | 0.1112  | 0.00271 | 0.01681 | 0.00016 | 76   | 25   | 107.1 | 2.5 | 107.4 | 1.0  | 1.0 |
| ZJ10-23-18 | 174    | 850   | 0.21 | 0.04799 | 0.00081 | 0.11253 | 0.00337 | 0.01679 | 0.00021 | 98.2 | 71.3 | 108.3 | 3.1 | 107.3 | 1.3  | 1.0 |
| ZJ10-23-19 | 127    | 396   | 0.32 | 0.0479  | 0.00085 | 0.11313 | 0.00334 | 0.01691 | 0.00018 | 94.5 | 73.1 | 108.8 | 3   | 108.1 | 1.1  | 1.0 |
| ZJ10-23-20 | 175    | 724   | 0.24 | 0.04754 | 0.00056 | 0.11233 | 0.00328 | 0.01693 | 0.00021 | 76   | 25   | 108.1 | 3   | 108.2 | 1.3  | 1.0 |
|            |        |       |      |         |         |         |         |         |         |      |      |       |     |       |      |     |
| SH12-1-1   | 1007.7 | 457.4 | 2.2  | 0.05051 | 0.00073 | 0.10783 | 0.0052  | 0.01553 | 0.00077 | 220  | 33.3 | 104   | 4.8 | 99.4  | 4.9  | 1.0 |
| SH12-1-2   | 1033.3 | 657.8 | 1.57 | 0.05708 | 0.00349 | 0.11957 | 0.0065  | 0.01521 | 0.00025 | 495  | 140  | 114.7 | 5.9 | 97.3  | 1.6  | 0.8 |
| SH12-1-3   | 780.3  | 489.4 | 1.59 | 0.05608 | 0.00548 | 0.11896 | 0.01144 | 0.01539 | 0.00019 | 454  | 212  | 114.1 | 10  | 98.5  | 1.2  | 0.9 |
| SH12-1-4   | 904.7  | 407.9 | 2.22 | 0.0533  | 0.00178 | 0.11461 | 0.00368 | 0.01568 | 0.00079 | 343  | 75.9 | 110.2 | 3.4 | 100.3 | 5.0  | 0.9 |
| SH12-1-5   | 624.3  | 183.1 | 3.41 | 0.05502 | 0.00286 | 0.11657 | 0.00754 | 0.01533 | 0.00041 | 413  | 112  | 112   | 6.9 | 98.1  | 2.6  | 0.9 |
| SH12-1-6   | 399    | 241.7 | 1.65 | 0.05004 | 0.00052 | 0.10584 | 0.00942 | 0.01533 | 0.00128 | 198  | 24.1 | 102.2 | 8.6 | 98.1  | 8.1  | 1.0 |
| SH12-1-7   | 800.6  | 379.7 | 2.11 | 0.05166 | 0.00079 | 0.10993 | 0.00254 | 0.01541 | 0.00022 | 333  | 35.2 | 105.9 | 2.3 | 98.6  | 1.4  | 0.9 |
| SH12-1-8   | 471.6  | 96.5  | 4.89 | 0.09731 | 0.00362 | 0.2112  | 0.00991 | 0.01557 | 0.00021 | 1573 | 70.4 | 194.6 | 8.3 | 99.6  | 1.3  | 0.5 |
| SH12-1-9   | 742.5  | 262.4 | 2.83 | 0.08482 | 0.00163 | 0.18159 | 0.00429 | 0.01546 | 0.00013 | 1322 | 38.1 | 169.4 | 3.7 | 98.9  | 0.8  | 0.6 |
| SH12-1-10  | 205.4  | 79.6  | 2.58 | 0.0877  | 0.00751 | 0.18762 | 0.01865 | 0.01543 | 0.00027 | 1376 | 133  | 174.6 | 16  | 98.7  | 1.7  | 0.6 |
| SH12-1-11  | 253.8  | 88.4  | 2.87 | 0.08067 | 0.00675 | 0.1675  | 0.01349 | 0.01518 | 0.00036 | 1213 | 165  | 157.2 | 12  | 97.1  | 2.3  | 0.6 |
| SH12-1-12  | 402.9  | 114.8 | 3.51 | 0.0568  | 0.00411 | 0.12106 | 0.01052 | 0.01534 | 0.00029 | 483  | 159  | 116   | 9.5 | 98.2  | 1.8  | 0.8 |
| SH12-1-13  | 1359.7 | 376.9 | 3.61 | 0.05021 | 0.00051 | 0.10558 | 0.00121 | 0.01527 | 0.00012 | 206  | 19.4 | 101.9 | 1.1 | 97.7  | 0.8  | 1.0 |
| SH12-1-14  | 288.6  | 197.5 | 1.46 | 0.06397 | 0.00356 | 0.14069 | 0.00098 | 0.01599 | 0.00081 | 740  | 118  | 133.7 | 0.9 | 102.3 | 5.1  | 0.8 |
| SH12-1-15  | 521.9  | 353.8 | 1.47 | 0.05631 | 0.00103 | 0.11989 | 0.00237 | 0.01545 | 0.00015 | 465  | 36.1 | 115   | 2.1 | 98.8  | 1.0  | 0.9 |
| SH12-1-16  | 406.1  | 191   | 2.13 | 0.06934 | 0.00258 | 0.15053 | 0.00589 | 0.01575 | 0.00021 | 909  | 75.9 | 142.4 | 5.2 | 100.7 | 1.3  | 0.7 |
| SH12-1-17  | 274.7  | 77.6  | 3.54 | 0.06239 | 0.00223 | 0.13359 | 0.00497 | 0.01553 | 0.00019 | 687  | 75.9 | 127.3 | 4.4 | 99.4  | 1.2  | 0.8 |
| SH12-1-18  | 451.7  | 215   | 2.1  | 0.07435 | 0.00517 | 0.16004 | 0.01274 | 0.01556 | 0.00022 | 1051 | 141  | 150.7 | 11  | 99.5  | 1.4  | 0.7 |
| SH12-1-19  | 1544.7 | 664.3 | 2.33 | 0.05327 | 0.00073 | 0.1139  | 0.00186 | 0.01551 | 0.00015 | 339  | 31.5 | 109.5 | 1.7 | 99.2  | 1.0  | 0.9 |
|            |        |       |      |         |         |         |         |         |         |      |      |       |     |       |      |     |
| SH12-2-1   | 187.5  | 109.3 | 1.72 | 0.16901 | 0.00351 | 0.43058 | 0.0102  | 0.01847 | 0.00017 | 2548 | 35.3 | 363.6 | 7.2 | 118   | 1.1  | 0.3 |
| SH12-2-2   | 491.1  | 428.7 | 1.15 | 0.08067 | 0.00233 | 0.18105 | 0.00743 | 0.01627 | 0.00029 | 1213 | 57.1 | 169   | 6.4 | 104   | 1.9  | 0.6 |
| SH12-2-3   | 241.3  | 82.5  | 2.93 | 0.21501 | 0.00642 | 0.54028 | 0.0246  | 0.01817 | 0.00037 | 2944 | 48.2 | 438.6 | 16  | 116.1 | 2.4  | 0.3 |
| SH12-2-4   | 195.5  | 110.3 | 1.77 | 0.10476 | 0.00327 | 0.22651 | 0.0082  | 0.01567 | 0.00017 | 1710 | 57.4 | 207.3 | 6.8 | 100.2 | 1.1  | 0.5 |
| SH12-2-5   | 165.9  | 62.3  | 2.66 | 0.08257 | 0.00369 | 0.18167 | 0.00946 | 0.01591 | 0.00027 | 1259 | 87.8 | 169.5 | 8.1 | 101.8 | 1.7  | 0.6 |
| SH12-2-6   | 131.8  | 59.9  | 2.2  | 0.16565 | 0.01594 | 0.42656 | 0.07402 | 0.01816 | 0.0016  | 2514 | 196  | 360.7 | 53  | 116   | 10.2 | 0.3 |
| SH12-2-7   | 298    | 194.1 | 1.54 | 0.06083 | 0.00446 | 0.1329  | 0.01156 | 0.0158  | 0.00053 | 632  | 153  | 126.7 | 10  | 101.1 | 3.3  | 0.8 |
| SH12-2-8   | 635.4  | 191.5 | 3.32 | 0.06342 | 0.00295 | 0.13898 | 0.00714 | 0.01594 | 0.00035 | 724  | 98.9 | 132.1 | 6.4 | 101.9 | 2.2  | 0.8 |
| SH12-2-9   | 1555.3 | 703.9 | 2.21 | 0.05299 | 0.0017  | 0.11455 | 0.006   | 0.01568 | 0.00068 | 328  | 72.2 | 110.1 | 5.5 | 100.3 | 4.3  | 0.9 |
| SH12-2-10  | 400.1  | 89.8  | 4.46 | 0.05647 | 0.00359 | 0.12319 | 0.0104  | 0.01577 | 0.00067 | 472  | 141  | 118   | 9.4 | 100.9 | 4.3  | 0.9 |
| SH12-2-11  | 2019.7 | 796.7 | 2.54 | 0.05305 | 0.00104 | 0.11725 | 0.00185 | 0.01604 | 0.00016 | 332  | 44.4 | 112.6 | 1.7 | 102.6 | 1.0  | 0.9 |
| SH12-2-12  | 1095.5 | 627.2 | 1.75 | 0.04992 | 0.00032 | 0.10673 | 0.0011  | 0.0155  | 0.00013 | 191  | 14.8 | 103   | 1   | 99.2  | 0.8  | 1.0 |
| SH12-2-13  | 555.6  | 259.5 | 2.14 | 0.05122 | 0.00073 | 0.11036 | 0.00181 | 0.01562 | 0.00014 | 250  | 33.3 | 106.3 | 1.7 | 99.9  | 0.9  | 0.9 |
| SH12-2-14  | 266.4  | 115.3 | 2.31 | 0.10059 | 0.00493 | 0.21927 | 0.01128 | 0.01582 | 0.00035 | 1635 | 90.7 | 201.3 | 9.4 | 101.2 | 2.2  | 0.5 |
| SH12-2-15  | 598.2  | 322.6 | 1.85 | 0.05154 | 0.00052 | 0.11222 | 0.00164 | 0.0158  | 0.00018 | 265  | 22.2 | 108   | 1.5 | 101   | 1.1  | 0.9 |
| SH12-2-16  | 364.9  | 189.4 | 1.93 | 0.05204 | 0.00116 | 0.11069 | 0.00232 | 0.01549 | 0.00022 | 287  | 54.6 | 106.6 | 2.1 | 99.1  | 1.4  | 0.9 |
| SH12-2-17  | 130.5  | 63.6  | 2.05 | 0.10097 | 0.00614 | 0.26023 | 0.02029 | 0.01834 | 0.00031 | 1643 | 113  | 234.9 | 16  | 117.2 | 1.9  | 0.5 |
| SH12-2-18  | 253.7  | 124.9 | 2.03 | 0.13428 | 0.00601 | 0.33101 |         |         |         |      |      |       |     |       |      |     |



|           |        |       |      |         |         |         |         |         |         |      |      |       |     |       |      |     |
|-----------|--------|-------|------|---------|---------|---------|---------|---------|---------|------|------|-------|-----|-------|------|-----|
| SH12-4-3  | 176.8  | 146.1 | 1.21 | 0.07544 | 0.00312 | 0.16689 | 0.0077  | 0.01599 | 0.00016 | 1080 | 83.3 | 156.7 | 6.7 | 102.3 | 1.0  | 0.7 |
| SH12-4-4  | 172.5  | 184.7 | 0.93 | 0.08065 | 0.00261 | 0.18363 | 0.0062  | 0.01651 | 0.0002  | 1213 | 64   | 171.2 | 5.3 | 105.6 | 1.3  | 0.6 |
| SH12-4-5  | 276.9  | 252.5 | 1.1  | 0.07009 | 0.00159 | 0.15724 | 0.00361 | 0.01627 | 0.00011 | 932  | 46.3 | 148.3 | 3.2 | 104.1 | 0.7  | 0.7 |
| SH12-4-6  | 396.5  | 246.5 | 1.61 | 0.07218 | 0.00212 | 0.16026 | 0.00523 | 0.01609 | 0.00017 | 991  | 59.3 | 150.9 | 4.6 | 102.9 | 1.1  | 0.7 |
| SH12-4-7  | 315.1  | 129.8 | 2.43 | 0.11747 | 0.00901 | 0.27417 | 0.03135 | 0.01622 | 0.00032 | 1918 | 138  | 246   | 25  | 103.7 | 2.0  | 0.4 |
| SH12-4-8  | 317    | 246.5 | 1.29 | 0.05785 | 0.0016  | 0.12655 | 0.00526 | 0.01586 | 0.00049 | 524  | 61.1 | 121   | 4.7 | 101.4 | 3.1  | 0.8 |
| SH12-4-9  | 439.6  | 296.4 | 1.48 | 0.05186 | 0.00114 | 0.11485 | 0.00333 | 0.01609 | 0.00037 | 280  | 50   | 110.4 | 3   | 102.9 | 2.3  | 0.9 |
| SH12-4-10 | 693.9  | 387   | 1.79 | 0.05153 | 0.00093 | 0.11207 | 0.0035  | 0.01577 | 0.0004  | 265  | 36.1 | 107.9 | 3.2 | 100.8 | 2.5  | 0.9 |
| SH12-4-11 | 131.3  | 136.8 | 0.96 | 0.05435 | 0.00143 | 0.11979 | 0.00535 | 0.01618 | 0.00077 | 387  | 59.3 | 114.9 | 4.8 | 103.5 | 4.9  | 0.9 |
| SH12-4-12 | 240.7  | 312.5 | 0.77 | 0.05135 | 0.00115 | 0.11381 | 0.00622 | 0.01616 | 0.00089 | 258  | 47.2 | 109.4 | 5.7 | 103.3 | 5.7  | 0.9 |
| SH12-4-13 | 75.6   | 70    | 1.08 | 0.0742  | 0.00047 | 1.36888 | 0.03125 | 0.13384 | 0.00297 | 1056 | 13   | 875.7 | 13  | 809.7 | 16.9 | 0.9 |
| SH12-4-14 | 161.3  | 168.9 | 0.95 | 0.14589 | 0.02966 | 0.4323  | 0.11304 | 0.02025 | 0.0014  | 2299 | 357  | 364.8 | 80  | 129.2 | 8.8  | 0.4 |
| SH12-4-15 | 173    | 438.8 | 0.39 | 0.05285 | 0.0007  | 0.1181  | 0.00272 | 0.01621 | 0.00032 | 324  | 26.9 | 113.4 | 2.5 | 103.7 | 2.0  | 0.9 |
| SH12-4-16 | 622    | 352.5 | 1.76 | 0.05849 | 0.00129 | 0.12962 | 0.00407 | 0.01613 | 0.00046 | 550  | 48.1 | 123.8 | 3.7 | 103.2 | 2.9  | 0.8 |
| SH12-4-17 | 489.8  | 355.7 | 1.38 | 0.05236 | 0.00078 | 0.11536 | 0.00291 | 0.01599 | 0.00035 | 302  | 39.8 | 110.9 | 2.7 | 102.3 | 2.2  | 0.9 |
| SH12-4-18 | 183.3  | 200.2 | 0.92 | 0.06601 | 0.00187 | 0.14896 | 0.00666 | 0.01635 | 0.00052 | 806  | 59.3 | 141   | 5.9 | 104.5 | 3.3  | 0.7 |
| SH12-4-19 | 155.8  | 145.4 | 1.07 | 0.06529 | 0.0047  | 0.14653 | 0.01008 | 0.01633 | 0.00037 | 783  | 147  | 138.8 | 8.9 | 104.4 | 2.4  | 0.8 |
| SH12-4-20 | 393.8  | 371.8 | 1.06 | 0.05047 | 0.0015  | 0.10877 | 0.00244 | 0.01567 | 0.00018 | 217  | 68.5 | 104.8 | 2.2 | 100.2 | 1.1  | 1.0 |
| SH12-6-1  | 418.4  | 297.9 | 1.4  | 0.04934 | 0.00337 | 0.10431 | 0.00964 | 0.01541 | 0.00131 | 165  | 152  | 100.7 | 8.9 | 98.6  | 8.3  | 1.0 |
| SH12-6-2  | 151.7  | 122.1 | 1.24 | 0.08018 | 0.00344 | 0.18206 | 0.00918 | 0.01643 | 0.00027 | 1267 | 84.4 | 169.8 | 7.9 | 105   | 1.7  | 0.6 |
| SH12-6-3  | 193.2  | 203.8 | 0.95 | 0.05053 | 0.00107 | 0.11129 | 0.00286 | 0.01596 | 0.00025 | 220  | 82.4 | 107.1 | 2.6 | 102.1 | 1.6  | 1.0 |
| SH12-6-4  | 332.3  | 206.4 | 1.61 | 0.05125 | 0.00082 | 0.1115  | 0.00257 | 0.01582 | 0.00034 | 250  | 37   | 107.3 | 2.4 | 101.2 | 2.1  | 0.9 |
| SH12-6-5  | 627.4  | 396.9 | 1.58 | 0.05045 | 0.00067 | 0.11503 | 0.00242 | 0.01657 | 0.00033 | 217  | 36.1 | 110.6 | 2.2 | 106   | 2.1  | 1.0 |
| SH12-6-6  | 624.4  | 439.6 | 1.42 | 0.05328 | 0.00141 | 0.11545 | 0.00955 | 0.01579 | 0.00147 | 343  | 59.3 | 110.9 | 8.7 | 101   | 9.3  | 0.9 |
| SH12-6-7  | 270.5  | 281.3 | 0.96 | 0.05552 | 0.00097 | 0.12636 | 0.00278 | 0.01657 | 0.00032 | 432  | 38.9 | 120.8 | 2.5 | 105.9 | 2.0  | 0.9 |
| SH12-6-8  | 304.8  | 277.1 | 1.1  | 0.0627  | 0.00689 | 0.13951 | 0.01672 | 0.01611 | 0.00081 | 698  | 231  | 132.6 | 15  | 103   | 5.1  | 0.8 |
| SH12-6-9  | 880.2  | 449.9 | 1.96 | 0.04845 | 0.00046 | 0.10594 | 0.00619 | 0.01584 | 0.00088 | 121  | 22.2 | 102.2 | 5.7 | 101.3 | 5.6  | 1.0 |
| SH12-6-10 | 314.8  | 199.2 | 1.58 | 0.05048 | 0.0017  | 0.10741 | 0.00365 | 0.01555 | 0.00044 | 217  | 47.2 | 103.6 | 3.3 | 99.5  | 2.8  | 1.0 |
| SH12-6-11 | 386    | 310.5 | 1.24 | 0.05038 | 0.00149 | 0.10869 | 0.00637 | 0.01573 | 0.00089 | 213  | 68.5 | 104.8 | 5.8 | 100.6 | 5.7  | 1.0 |
| SH12-6-12 | 204.9  | 201.4 | 1.02 | 0.07517 | 0.00569 | 0.17704 | 0.01659 | 0.01668 | 0.00038 | 1073 | 148  | 165.5 | 14  | 106.7 | 2.4  | 0.6 |
| SH12-6-13 | 130.7  | 125.1 | 1.04 | 0.05179 | 0.00128 | 0.11346 | 0.00544 | 0.01578 | 0.00057 | 276  | 57.4 | 109.1 | 5   | 100.9 | 3.6  | 0.9 |
| SH12-6-14 | 220    | 209.2 | 1.05 | 0.08418 | 0.00396 | 0.19971 | 0.01341 | 0.01706 | 0.00043 | 1298 | 60.2 | 184.9 | 11  | 109   | 2.7  | 0.6 |
| SH12-6-15 | 486.7  | 338.2 | 1.44 | 0.05176 | 0.00069 | 0.1117  | 0.00209 | 0.01564 | 0.0002  | 276  | 31.5 | 107.5 | 1.9 | 100.1 | 1.2  | 0.9 |
| SH12-6-16 | 1752.6 | 574.8 | 3.05 | 0.05117 | 0.00067 | 0.11172 | 0.00199 | 0.01584 | 0.00022 | 256  | 31.5 | 107.5 | 1.8 | 101.3 | 1.4  | 0.9 |
| SH12-6-17 | 413.3  | 272.7 | 1.52 | 0.05222 | 0.00087 | 0.11264 | 0.00231 | 0.01565 | 0.00023 | 295  | 37   | 108.4 | 2.1 | 100.1 | 1.4  | 0.9 |
| SH12-6-18 | 125.2  | 114.9 | 1.09 | 0.05095 | 0.00314 | 0.11205 | 0.00601 | 0.01599 | 0.00025 | 239  | 138  | 107.8 | 5.5 | 102.3 | 1.6  | 0.9 |
| SH12-6-19 | 796.8  | 386.8 | 2.06 | 0.05234 | 0.00052 | 0.11485 | 0.00137 | 0.01592 | 0.00013 | 302  | 24.1 | 110.4 | 1.2 | 101.8 | 0.8  | 0.9 |
| SH12-6-20 | 574.2  | 360.7 | 1.59 | 0.04969 | 0.00063 | 0.10876 | 0.00324 | 0.01586 | 0.0004  | 189  | 29.6 | 104.8 | 3   | 101.4 | 2.6  | 1.0 |
| SH12-7-1  | 214.2  | 306.8 | 0.7  | 0.05174 | 0.00078 | 0.11625 | 0.00372 | 0.01626 | 0.00041 | 272  | 35.2 | 111.7 | 3.4 | 104   | 2.6  | 0.9 |
| SH12-7-2  | 136.1  | 204.8 | 0.66 | 0.04985 | 0.00068 | 0.11056 | 0.00234 | 0.01607 | 0.00025 | 187  | 26.8 | 106.5 | 2.1 | 102.8 | 1.6  | 1.0 |
| SH12-7-3  | 105.8  | 286.4 | 0.37 | 0.06223 | 0.00176 | 0.1504  | 0.00596 | 0.01767 | 0.00066 | 683  | 61.1 | 142.3 | 5.3 | 112.9 | 4.2  | 0.8 |
| SH12-7-4  | 155    | 423.5 | 0.37 | 0.0505  | 0.00065 | 0.11418 | 0.0031  | 0.01638 | 0.00039 | 217  | 34.3 | 109.8 | 2.8 | 104.8 | 2.5  | 1.0 |
| SH12-7-5  | 202.1  | 278.5 | 0.73 | 0.05075 | 0.00067 | 0.11484 | 0.00268 | 0.01644 | 0.00033 | 228  | 31.5 | 110.4 | 2.4 | 105.1 | 2.1  | 1.0 |
| SH12-7-6  | 288.8  | 412.5 | 0.7  | 0.05047 | 0.00179 | 0.11309 | 0.0099  | 0.01616 | 0.00084 | 217  | 83.3 | 108.8 | 9   | 103.4 | 5.3  | 1.0 |
| SH12-7-7  | 283    | 804.3 | 0.35 | 0.05073 | 0.00056 | 0.11673 | 0.00265 | 0.01674 | 0.0004  | 228  | 21.3 | 112.1 | 2.4 | 107   | 2.5  | 1.0 |
| SH12-7-8  | 251.2  | 303.8 | 0.83 | 0.05054 | 0.00364 | 0.11068 | 0.01108 | 0.01611 | 0.00229 | 220  | 173  | 106.6 | 10  | 103   | 14.6 | 1.0 |
| SH12-7-9  | 183.1  | 348.7 | 0.53 | 0.0505  | 0.00064 | 0.11511 | 0.00229 | 0.01651 | 0.00022 | 217  | 34.3 | 110.6 | 2.1 | 105.6 | 1.4  | 1.0 |
| SH12-7-10 | 185.2  | 262.1 | 0.71 | 0.05146 | 0.00053 | 0.11574 | 0.00126 | 0.01633 | 0.00011 | 261  | 22.2 | 111.2 | 1.1 | 104.4 | 0.7  | 0.9 |
| SH12-7-11 | 192.7  | 401.7 | 0.48 | 0.05091 | 0.00056 | 0.11435 | 0.00203 | 0.0163  | 0.00025 | 235  | 24.1 | 109.9 | 1.8 | 104.3 | 1.6  | 0.9 |
| SH12-7-12 | 182.7  | 281.1 | 0.65 | 0.05022 | 0.00064 | 0.11164 | 0.00239 | 0.0161  | 0.00025 | 206  | 29.6 | 107.5 | 2.2 | 103   | 1.6  | 1.0 |
| SH12-7-13 | 181    | 273.3 | 0.66 | 0.05076 | 0.00081 | 0.11256 | 0.00231 | 0.0161  | 0.00023 | 232  | 35.2 | 108.3 | 2.1 | 103   | 1.5  | 1.0 |
| SH12-7-14 | 306.9  | 320   | 0.96 | 0.05167 | 0.00107 | 0.11789 | 0.00479 | 0.01654 | 0.00051 | 333  | 41.7 | 113.2 | 4.4 | 105.7 | 3.2  | 0.9 |
| SH12-7-15 | 309.5  | 432.9 | 0.71 | 0.05195 | 0.00084 | 0.11668 | 0.00301 | 0.01623 | 0.0002  | 283  | 32.4 | 112.1 | 2.7 | 103.8 | 1.3  | 0.9 |
| SH12-7-16 | 143.6  | 228.9 | 0.63 | 0.05058 | 0.00067 | 0.11535 | 0.00198 | 0.01654 | 0.00017 | 220  | 31.5 | 110.8 | 1.8 | 105.8 | 1.1  | 1.0 |
| SH12-8-1  | 228.7  | 407.4 | 0.56 | 0.0504  | 0.00084 | 0.11512 | 0.00363 | 0.01661 | 0.0006  | 213  | 38.9 | 110.6 | 3.3 | 106.2 | 3.8  | 1.0 |
| SH12-8-2  | 225.8  | 293.6 | 0.77 | 0.05007 | 0.00052 | 0.11037 | 0.00152 | 0.01601 | 0.00018 | 198  | 24.1 | 106.3 | 1.4 | 102.4 | 1.1  | 1.0 |
| SH12-8-3  | 133.7  | 237.4 | 0.56 | 0.05046 | 0.00182 | 0.11264 | 0.00508 | 0.01623 | 0.00086 | 217  | 83.3 | 108.4 | 4.6 | 103.8 | 5.4  | 1.0 |
| SH12-8-4  | 439    | 439.7 | 1    | 0.05042 | 0.00037 | 0.11212 | 0.00158 | 0.01612 | 0.00018 | 213  | 16.7 | 107.9 | 1.4 | 103.1 | 1.2  | 1.0 |
| SH12-8-5  | 147.3  | 234.4 | 0.63 | 0.0508  | 0.00101 | 0.11366 | 0.00367 | 0.01627 | 0.00053 | 232  | 46.3 | 109.3 | 3.3 | 104   | 3.4  | 1.0 |
| SH12-8-6  | 306.2  | 545.7 | 0.56 | 0.05063 | 0.00039 | 0.11348 | 0.00182 | 0.01628 | 0.00025 | 233  | 18.5 | 109.1 | 1.7 | 104.1 | 1.6  | 1.0 |
| SH12-8-7  | 369.5  | 455.3 | 0.81 | 0.05042 | 0.00041 | 0.11298 | 0.00255 | 0.01629 | 0.00036 | 213  | 18.5 | 108.7 | 2.3 | 104.2 | 2.3  | 1.0 |
| SH12-8-8  | 143.4  | 338.9 | 0.42 | 0.0512  | 0.00118 | 0.11588 | 0.00463 | 0.01643 | 0.00058 | 250  | 53.7 | 111.3 | 4.2 | 105.1 | 3.7  | 0.9 |
| SH12-8-9  | 188.7  | 285.6 | 0.66 | 0.05022 | 0.00056 | 0.11194 | 0.00291 | 0.01621 | 0.00042 | 206  | 21.3 | 107.7 | 2.7 | 103.7 | 2.6  | 1.0 |
| SH12-8-10 | 99.3   | 148.8 | 0.67 | 0.0498  | 0.00579 | 0.11547 | 0.01494 | 0.01675 | 0.00029 | 187  | 248  | 111   | 14  | 107.1 | 1.8  | 1.0 |
| SH12-8-11 | 501.1  | 369.3 | 1.36 | 0.05006 | 0.00046 | 0.11348 | 0.00197 | 0.01643 | 0.00024 | 198  | 22.2 | 109.1 | 1.8 | 105   | 1.5  | 1.0 |
| SH12-8-12 | 487.9  | 465.4 | 1.05 | 0.05055 | 0.00111 | 0.11325 | 0.00398 | 0.01623 | 0.00042 | 220  | 82.4 | 108.9 | 3.6 | 103.8 | 2.6  | 1.0 |
| SH12-8-13 | 232.9  | 312.7 | 0.75 | 0.05306 | 0.00067 | 0.11811 | 0.00178 | 0.01616 | 0.0002  | 332  | 29.6 | 113.4 | 1.6 | 103.3 | 1.3  | 0.9 |
| SH12-8-14 | 455.8  | 481.6 | 0.95 | 0.04915 | 0.00053 | 0.10895 | 0.00195 | 0.01608 | 0.00025 | 154  | 30.6 | 105   | 1.8 | 102.8 | 1.6  | 1.0 |
| SH12-8-15 | 233.8  | 263.7 | 0.89 | 0.0491  | 0.00129 | 0.10759 | 0.00299 | 0.01589 | 0.00006 | 154  | 56.5 | 103.8 | 2.7 | 101.6 | 0.4  | 1.0 |
| SH12-8-16 | 202.7  | 265.8 | 0.76 | 0.04936 | 0.00101 | 0.10894 | 0.00244 | 0.01601 |         |      |      |       |     |       |      |     |



|            |        |       |      |         |         |         |         |         |         |      |      |       |     |       |      |     |
|------------|--------|-------|------|---------|---------|---------|---------|---------|---------|------|------|-------|-----|-------|------|-----|
| SH12-9-8   | 151.9  | 405.2 | 0.37 | 0.05163 | 0.00141 | 0.11491 | 0.00447 | 0.01613 | 0.00036 | 333  | 63   | 110.5 | 4.1 | 103.2 | 2.3  | 0.9 |
| SH12-9-9   | 241    | 346.1 | 0.7  | 0.05348 | 0.00336 | 0.12033 | 0.00614 | 0.01638 | 0.00053 | 350  | 138  | 115.4 | 5.6 | 104.8 | 3.4  | 0.9 |
| SH12-9-10  | 273.4  | 661.1 | 0.41 | 0.04982 | 0.00086 | 0.11018 | 0.00252 | 0.01604 | 0.00025 | 187  | 43.5 | 106.1 | 2.3 | 102.6 | 1.6  | 1.0 |
| SH12-9-11  | 86     | 260.4 | 0.33 | 0.05036 | 0.00158 | 0.11139 | 0.00387 | 0.01609 | 0.00052 | 213  | 41.7 | 107.2 | 3.5 | 102.9 | 3.3  | 1.0 |
| SH12-9-12  | 138    | 173.5 | 0.8  | 0.05022 | 0.00093 | 0.11105 | 0.00792 | 0.01596 | 0.00091 | 206  | 47.2 | 106.9 | 7.2 | 102.1 | 5.8  | 1.0 |
| SH12-9-13  | 557.1  | 1184  | 0.47 | 0.04977 | 0.00047 | 0.11146 | 0.0028  | 0.01624 | 0.00039 | 183  | 22.2 | 107.3 | 2.6 | 103.9 | 2.5  | 1.0 |
| SH12-9-14  | 274.7  | 367.2 | 0.75 | 0.04823 | 0.00093 | 0.11136 | 0.00412 | 0.01673 | 0.00045 | 109  | 50.9 | 107.2 | 3.8 | 106.9 | 2.9  | 1.0 |
| SH12-9-15  | 149.1  | 269.6 | 0.55 | 0.04848 | 0.00157 | 0.11023 | 0.00485 | 0.01636 | 0.00049 | 124  | 71.3 | 106.2 | 4.4 | 104.6 | 3.1  | 1.0 |
| SH12-9-16  | 406    | 511   | 0.79 | 0.04951 | 0.00034 | 0.10981 | 0.00114 | 0.0161  | 0.00013 | 172  | 10.2 | 105.8 | 1   | 102.9 | 0.8  | 1.0 |
| SH12-9-17  | 344.8  | 525   | 0.66 | 0.04911 | 0.00027 | 0.10875 | 0.00117 | 0.01607 | 0.00016 | 154  | 13   | 104.8 | 1.1 | 102.8 | 1.0  | 1.0 |
| SH12-9-18  | 383.7  | 397.5 | 0.97 | 0.05015 | 0.00037 | 0.11174 | 0.0013  | 0.01616 | 0.00014 | 211  | 18.5 | 107.6 | 1.2 | 103.3 | 0.9  | 1.0 |
| SH12-9-19  | 247.4  | 300.2 | 0.82 | 0.04983 | 0.00073 | 0.1123  | 0.00273 | 0.01634 | 0.00031 | 187  | 33.3 | 108.1 | 2.5 | 104.5 | 1.9  | 1.0 |
| SH12-9-20  | 111.5  | 188.6 | 0.59 | 0.05181 | 0.00082 | 0.11473 | 0.00224 | 0.01607 | 0.00019 | 276  | 41.7 | 110.3 | 2   | 102.8 | 1.2  | 0.9 |
| SH12-13-1  | 163.8  | 102.3 | 1.6  | 0.05143 | 0.00158 | 0.11112 | 0.00341 | 0.01569 | 0.0002  | 261  | 70.4 | 107   | 3.1 | 100.4 | 1.3  | 0.9 |
| SH12-13-2  | 307.3  | 184.1 | 1.67 | 0.04914 | 0.00132 | 0.10479 | 0.00232 | 0.01551 | 0.00018 | 154  | 58.3 | 101.2 | 2.1 | 99.2  | 1.2  | 1.0 |
| SH12-13-3  | 89.2   | 44.5  | 2.01 | 0.04906 | 0.0022  | 0.10401 | 0.00454 | 0.01556 | 0.00065 | 150  | 106  | 100.5 | 4.2 | 99.5  | 4.1  | 1.0 |
| SH12-13-4  | 461.3  | 160.2 | 2.88 | 0.04841 | 0.00324 | 0.10251 | 0.00809 | 0.01535 | 0.00074 | 121  | 213  | 99.1  | 7.5 | 98.2  | 4.7  | 1.0 |
| SH12-13-5  | 500.2  | 257.9 | 1.94 | 0.05056 | 0.00078 | 0.10731 | 0.00222 | 0.0154  | 0.0002  | 220  | 37   | 103.5 | 2   | 98.5  | 1.3  | 1.0 |
| SH12-13-6  | 618.1  | 304.5 | 2.03 | 0.05092 | 0.0021  | 0.1084  | 0.00727 | 0.01532 | 0.00051 | 235  | 94.4 | 104.5 | 6.7 | 98    | 3.2  | 0.9 |
| SH12-13-7  | 285.6  | 216.1 | 1.32 | 0.05108 | 0.00184 | 0.11022 | 0.00497 | 0.0157  | 0.00078 | 243  | 78.7 | 106.2 | 4.5 | 100.4 | 5.0  | 0.9 |
| SH12-13-8  | 766    | 424.6 | 1.8  | 0.04819 | 0.00077 | 0.10623 | 0.00584 | 0.016   | 0.00087 | 109  | 34.3 | 102.5 | 5.4 | 102.4 | 5.5  | 1.0 |
| SH12-13-9  | 672.1  | 358.8 | 1.87 | 0.0494  | 0.0004  | 0.10728 | 0.00175 | 0.01578 | 0.00024 | 165  | 18.5 | 103.5 | 1.6 | 100.9 | 1.5  | 1.0 |
| SH12-13-10 | 245.2  | 111.4 | 2.2  | 0.06343 | 0.00218 | 0.14735 | 0.00609 | 0.01685 | 0.00037 | 724  | 72.2 | 139.6 | 5.4 | 107.7 | 2.4  | 0.8 |
| SH12-13-11 | 230.9  | 215.1 | 1.07 | 0.0492  | 0.00348 | 0.10722 | 0.00998 | 0.01591 | 0.00158 | 167  | 156  | 103.4 | 9.2 | 101.8 | 10.1 | 1.0 |
| SH12-13-12 | 135    | 72.7  | 1.86 | 0.20426 | 0.02016 | 0.95295 | 0.19242 | 0.02277 | 0.00174 | 2861 | 161  | 679.6 | 100 | 145.1 | 10.9 | 0.2 |
| SH12-13-13 | 1449.2 | 383.1 | 3.78 | 0.04958 | 0.0005  | 0.10588 | 0.00251 | 0.01545 | 0.00032 | 176  | 24.1 | 102.2 | 2.3 | 98.9  | 2.0  | 1.0 |
| SH12-13-14 | 333.8  | 346.5 | 0.96 | 0.0489  | 0.00046 | 0.10343 | 0.00218 | 0.01538 | 0.00032 | 143  | 22.2 | 99.9  | 2   | 98.4  | 2.0  | 1.0 |
| SH12-13-15 | 284.1  | 260.4 | 1.09 | 0.049   | 0.00071 | 0.10615 | 0.00239 | 0.01569 | 0.00028 | 146  | 33.3 | 102.4 | 2.2 | 100.4 | 1.8  | 1.0 |
| SH12-13-16 | 511.8  | 215.7 | 2.37 | 0.05009 | 0.00104 | 0.11024 | 0.00396 | 0.016   | 0.00055 | 198  | 52.8 | 106.2 | 3.6 | 102.3 | 3.5  | 1.0 |
| SH12-14-1  | 520.5  | 211.1 | 2.47 | 0.05186 | 0.00116 | 0.11531 | 0.00409 | 0.01608 | 0.00036 | 280  | 51.8 | 110.8 | 3.7 | 102.8 | 2.3  | 0.9 |
| SH12-14-2  | 230.5  | 123.6 | 1.86 | 0.05068 | 0.00125 | 0.11052 | 0.00331 | 0.01588 | 0.00035 | 233  | 57.4 | 106.4 | 3   | 101.5 | 2.2  | 1.0 |
| SH12-14-3  | 802.4  | 307.6 | 2.61 | 0.05105 | 0.00193 | 0.11138 | 0.00724 | 0.01598 | 0.00109 | 243  | 87   | 107.2 | 6.6 | 102.2 | 6.9  | 1.0 |
| SH12-14-4  | 1316.4 | 443.8 | 2.97 | 0.0507  | 0.00054 | 0.10775 | 0.00174 | 0.01545 | 0.00022 | 228  | 19.4 | 103.9 | 1.6 | 98.8  | 1.4  | 1.0 |
| SH12-14-5  | 260.1  | 136   | 1.91 | 0.05567 | 0.00233 | 0.12064 | 0.00561 | 0.01575 | 0.0004  | 439  | 94.4 | 115.7 | 5.1 | 100.7 | 2.5  | 0.9 |
| SH12-14-6  | 1477.2 | 456.6 | 3.24 | 0.04955 | 0.00043 | 0.1061  | 0.00185 | 0.01558 | 0.00027 | 172  | 20.4 | 102.4 | 1.7 | 99.6  | 1.7  | 1.0 |
| SH12-14-7  | 243.3  | 172.1 | 1.44 | 0.05008 | 0.00281 | 0.11138 | 0.01018 | 0.01602 | 0.00125 | 198  | 132  | 107.2 | 9.3 | 102.5 | 7.9  | 1.0 |
| SH12-14-8  | 232.2  | 247.7 | 0.94 | 0.04996 | 0.00059 | 0.10806 | 0.00214 | 0.01568 | 0.00025 | 195  | 27.8 | 104.2 | 2   | 100.3 | 1.6  | 1.0 |
| SH12-14-9  | 92.3   | 135.8 | 0.68 | 0.05177 | 0.00108 | 0.17272 | 0.00458 | 0.02428 | 0.00054 | 276  | 45.4 | 161.8 | 4   | 154.6 | 3.4  | 1.0 |
| SH12-14-10 | 336.6  | 105.8 | 3.18 | 0.04999 | 0.00068 | 0.10747 | 0.00192 | 0.01558 | 0.00016 | 195  | 36.1 | 103.6 | 1.8 | 99.6  | 1.0  | 1.0 |
| SH12-14-11 | 842.2  | 848.9 | 0.99 | 0.04868 | 0.00115 | 0.10373 | 0.00601 | 0.01544 | 0.00068 | 132  | 55.6 | 100.2 | 5.5 | 98.8  | 4.3  | 1.0 |
| SH12-14-12 | 1137.8 | 282   | 4.03 | 0.04968 | 0.00132 | 0.1051  | 0.00548 | 0.01532 | 0.00058 | 189  | 61.1 | 101.5 | 5   | 98    | 3.7  | 1.0 |
| SH12-14-13 | 200.9  | 131.9 | 1.52 | 0.0488  | 0.00377 | 0.10691 | 0.01472 | 0.01576 | 0.00141 | 200  | 109  | 103.1 | 14  | 100.8 | 8.9  | 1.0 |
| SH12-14-14 | 985.5  | 436.1 | 2.26 | 0.0508  | 0.00185 | 0.11307 | 0.01129 | 0.01608 | 0.00108 | 232  | 88   | 108.8 | 10  | 102.8 | 6.8  | 0.9 |
| SH12-14-15 | 260    | 96.7  | 2.69 | 0.04817 | 0.00103 | 0.10318 | 0.00432 | 0.01553 | 0.00051 | 109  | 54.6 | 99.7  | 4   | 99.3  | 3.2  | 1.0 |
| SH12-14-16 | 348    | 120.3 | 2.89 | 0.05139 | 0.00267 | 0.10984 | 0.00369 | 0.01554 | 0.00036 | 258  | 86.1 | 105.8 | 3.4 | 99.4  | 2.3  | 0.9 |
| SH12-14-17 | 509.9  | 168.6 | 3.02 | 0.04941 | 0.00124 | 0.10667 | 0.0033  | 0.01565 | 0.00024 | 169  | 62   | 102.9 | 3   | 100.1 | 1.5  | 1.0 |
| SH12-14-18 | 138.5  | 168.3 | 0.82 | 0.0516  | 0.001   | 0.11306 | 0.00221 | 0.01593 | 0.00015 | 333  | 44.4 | 108.8 | 2   | 101.9 | 1.0  | 0.9 |
| SH12-14-19 | 198.9  | 81.1  | 2.45 | 0.0529  | 0.00185 | 0.11234 | 0.00356 | 0.0155  | 0.00028 | 324  | 112  | 108.1 | 3.2 | 99.2  | 1.7  | 0.9 |

Notes: 1, Region numbers as marked in figure 1; 2, ratio of  $^{206}\text{Pb}/^{238}\text{U}$  versus  $^{207}\text{Pb}/^{235}\text{U}$  indicating concordance; 3 data with cross lines are zircons that are either discordant, or errors over 3-5%, or inherited.

## References cited

- Guo, F. S., Yang, Q. K., Xie, C. F., Meng, X. J., Zhou, W. P., Jiang, Y. B., Zhang, S. M., and Wu, Z. C.: Zircon geochronology and evolution sequence of the acidic volcano intrusive complex from Xiangshan, Jiangxi Province, *Chin J. Geol.*, 50(3), 684-707 (in Chinese with abstract), 2015.
- Hu, G., Hu, W. X., Cao, J., Yao, S. p., Wang, X. Y., and Liu, Y. X.: The zircon U-Pb dating of the Lower Cretaceous Bantou Formation in western Fujian and stratigraphic correlation, *Adv. Earth Sci.* 26(9), 933-943 (in Chinese with English abstract), 2011.
- Jiang, S. H., Bagas, L., and Liang, Q. L.: New insights into the petrogenesis of volcanic rocks in the Shanghang Basin in the Fujian Province, China. *J. Asian Earth Sci.*, 105, 48-67, 2015.
- Jiang, S. H., Liang, Q. L., Bagas, L., Wang, S. H., Nie, F. J., and Liu, Y. F.: Geodynamic setting of the Zijinshan porphyry-epithermal Cu-Au-Mo-Ag ore system, SW Fujian Province, China: constraints from the geochronology and geochemistry of the igneous rocks. *Ore Geol. Rev.*, 53, 287-305, 2013.
- Li, C. L., Wang, Z. X., Wang, D. X., Cao, W. T., Yu, X. Q., Zhou, G. Z., and Gao, W. L.: Crust-mantle interaction triggered by oblique subduction of the Pacific plate: geochronological, geochemical, and Hf isotopic evidence from the Early Cretaceous volcanic rocks of Zhejiang Province, southeast China, *Intl. Geol. Rev.*, 56(14), 1732-1753, doi: 10.1080/00206814.2014.956347, 2014.
- Li, J. H., Ma, Z. L., Zhang, Y. Q., Dong, S. W., Li, Y., Lu, M. A., and Tan, J. Q.: Tectonic evolution of Cretaceous extensional basins in Zhejiang Province, eastern South China: Structural and geochronological constraints. *Intl. Geol. Rev.*, 56(13), 1602-1629, doi: 10.1080/00206814.2014.951978, 2014.
- Liu, F. Y., Wu, J. H., and Liu, S.: Early Cretaceous zircon SHRIMP U-Pb age of the trachyte and its significances of the Gan-Hang belt. *J. East China Inst. Technol.*, 32(4), 330-335 (in Chinese with English abstract), 2009.
- Liu, L., Xu, X. S., and Xia, Y.: Asynchronizing paleo-Pacific slab rollback beneath SE China: Insights from the episodic Late Mesozoic volcanism, *Gond. Res.*, 37, 397-407, 2016.
- Liu, L., Xu, X. S., and Xia, Y.: Cretaceous Pacific plate movement beneath SE China: Evidence from episodic volcanism and related intrusions, *Tectonophysics*, 614, 170-184, 2014.
- Liu, L., Xu, X. S., and Zou, H. B.: Episodic eruptions of the Late Mesozoic volcanic sequences in southeastern Zhejiang, SE China: petrogenesis and implications for the geodynamics of paleo-Pacific subduction, *Lithos*, 154, 166-180, 2012.
- Ma, Z. L., Li, J. H., Zhang, Y. Q., Dong, S. W., Song, C. Z., and Li, Y.: Geochronological and structural constraints on the lithostratigraphic units of the Lishui Basin, southeastern China, *Geol. China*, 43(1), 56-71 (in Chinese with English abstract), 2016.
- Shu, X., Yang, S. Y., Jiang, S. Y., and Ye, M.: Petrogenesis and geodynamic setting of Early Cretaceous felsic rocks in the Gan-Hang Belt, Southeast China: Constraints from geochronology and geochemistry of the tuffs and trachyandesitic rocks in Shengyuan volcanic Basin, *Lithos*, 284-285, 691-708, 2017.
- Su, H. M., Mao, J. W., He, X. R., and Lu, R.: Timing of the formation of the Tianhuashan Basin, northern Wuyi: constraints from geochronology of volcanic and plutonic rocks, *Sci. China (Series D)*, 56, 940-955, 2013.
- Su, H. M., Mao, J. W., Santosh, M., and Xie, G. Q.: Petrogenesis and tectonic significance of Late Jurassic–Early Cretaceous volcanic-intrusive complex in the Tianhuashan basin, South China, *Ore Geol. Rev.*, 56, 566-583, 2014.



- Wang, J. E., Liu, Y. D., Wang, Z., Tao, L., and Li, Y.: SHRIMP zircon U-Pb ages of the Zhucun Formation of the Moshishan Group in Zhejiang, *J. Stratigr.*, 39(2), 267-273 (in Chinese with English abstract), 2015.
- Wang, J. E., Wang, Z., Liu, Y. D., and Liang, H.: Geological age and structural environment of volcanic rocks from the Laocun Formation (Jiande Group), *J. Stratigr.*, 40(3), 261-271 (in Chinese with English abstract), 2016.
- Wu, J. H., Lao, Y. J., Xie, G. F., Zhang, J. Y., Wu, R. G., Nie, F. J.: Stratigraphy and geochronology of the volcanic rocks in the Xiangshan uranium orefield, Jiangxi Province and its geological implications. *Geol. China*, 44(5), 974-992 (in Chinese with English abstract), 2017.
- Wu, J. H., Liu, F. Y., and Liu, Sh.: SHRIMP U-Pb Zircon Age of Late Mesozoic Trachyte in Xiajiang—Guangfeng and Sannan (Quannan, Dingnan and Longnan)—Xunwu Volcanic Belts, *Geol. Rev.*, 57(1), 125-132 (in Chinese with English abstract), 2011a.
- Wu, J. H., Xiang, Y. X., and Liu, S.: Wuyi Group of southern Jiangxi and its geological age, *J. Stratigr.*, 35(2), 200-208 (in Chinese with English abstract), 2011b.
- Wu, J., and Wu, J. H.: Shuangfengling formation in Jiangxi and its geological age, *J. East China Inst. Techn.*, 36, 17-24 (in Chinese with English abstract), 2013.
- Yang, S. Y., Jiang, S. Y., Jiang, Y. H., Zhao, K. D., and Fan, H. H.: Zircon U-Pb geochronology, Hf isotopic composition and geological implications of the rhyodacite and rhyodacitic porphyry in the Xiangshan uranium ore field, Jiangxi Province, China, *Sci. China (Earth Sci.)*, 40(8), 953-969, doi: 10.1007/s11430-010-4058-0, 2010.
- Yang, S. Y., Jiang, S. Y., Zhao, K. D., Jiang, Y. H., Ling, H. F., and Chen, P. R.: Timing and geological implications of volcanic rocks from the Ruyiting Section, Xiangshan uranium ore field, Jiangxi province, SE China, *Acta Petro. Sin.*, 29(12), 4362-4372 (in Chinese with English abstract), 2013.
- Zhang, F. Q., Chen, H. L., Batt, G. E., Li, Z. X., and Yang, S. F.: Early Cretaceous Aptian charcoal from Xinchang petrified wood national Geopark of Zhejiang province, eastern South China, *Palaos*, 29, 325-337, doi: <http://dx.doi.org/10.2110/palo.2013.130>, 2014.
- Zhang, J. H., Yang, J. H., Chen, J. Y., Wu, F. Y., and Wilde, S. A.: Genesis of late Early Cretaceous high-silica rhyolites in eastern Zhejiang Province, southeast China: A crystal mush origin with mantle input, *Lithos*, 296-299, 482-495, 2018.
- Zhang, J. J., Shi, G. H., Tong, G. S., Zhang, Z. Y., Liu, H., Wu, R. T., and Chen, L.: Geochemistry and geochronology of copper and polymetal-bearing volcanic rocks of the Ehuling Formation in Xujiadun, Zhejiang Province, *Acta Geol. Sin.*, 83, 791-799 (in Chinese with English abstract), 2009.



Table RD3 Details of single zircon U-Pb isotope ages of volcanic and pyroclastic rocks from former works in the CZ, South China

| Analysis                                                                             | Th U  |       | Th/U | Isotopic ratio                       |         |                                     |         |                                     |         |                                      |         | Age (Ma)                             |     |                                     |    |                                     |     |                                      |     | Con-<br>cord |
|--------------------------------------------------------------------------------------|-------|-------|------|--------------------------------------|---------|-------------------------------------|---------|-------------------------------------|---------|--------------------------------------|---------|--------------------------------------|-----|-------------------------------------|----|-------------------------------------|-----|--------------------------------------|-----|--------------|
|                                                                                      | (ppm) | (ppm) |      | <sup>207</sup> Pb/ <sup>206</sup> Pb | 1σ      | <sup>207</sup> Pb/ <sup>235</sup> U | 1σ      | <sup>206</sup> Pb/ <sup>238</sup> U | 1σ      | <sup>208</sup> Pb/ <sup>232</sup> Th | 1σ      | <sup>207</sup> Pb/ <sup>206</sup> Pb | 1σ  | <sup>207</sup> Pb/ <sup>235</sup> U | 1σ | <sup>206</sup> Pb/ <sup>238</sup> U | 1σ  | <sup>208</sup> Pb/ <sup>232</sup> Th | 1σ  |              |
| Zhejiang province                                                                    |       |       |      |                                      |         |                                     |         |                                     |         |                                      |         |                                      |     |                                     |    |                                     |     |                                      |     |              |
| N1, Xiaoxiong, Sanmen (Liu et al., 2012)                                             |       |       |      |                                      |         |                                     |         |                                     |         |                                      |         |                                      |     |                                     |    |                                     |     |                                      |     |              |
| XX06-01                                                                              | 2981  | 574   | 5.20 | 0.04794                              | 0.00196 | 0.09661                             | 0.00387 | 0.01462                             | 0.00021 | 0.00547                              | 0.00068 | 96                                   | 92  | 94                                  | 4  | 94                                  | 1   | 110                                  | 14  | 1.00         |
| XX06-02                                                                              | 981   | 406   | 2.42 | 0.05036                              | 0.00221 | 0.10229                             | 0.00443 | 0.01474                             | 0.00021 | 0.00568                              | 0.00056 | 212                                  | 104 | 99                                  | 4  | 94                                  | 1   | 114                                  | 11  | 0.95         |
| XX06-03                                                                              | 707   | 339   | 2.09 | 0.04797                              | 0.00256 | 0.09528                             | 0.00502 | 0.01441                             | 0.00022 | 0.00537                              | 0.00051 | 98                                   | 120 | 92                                  | 5  | 92                                  | 1   | 108                                  | 10  | 1.00         |
| XX06-04                                                                              | 1165  | 598   | 1.95 | 0.04922                              | 0.00162 | 0.09714                             | 0.00317 | 0.01432                             | 0.00019 | 0.00515                              | 0.00050 | 158                                  | 79  | 94                                  | 3  | 92                                  | 1   | 104                                  | 10  | 0.98         |
| XX06-05                                                                              | 3706  | 708   | 5.23 | 0.04782                              | 0.00207 | 0.09760                             | 0.00413 | 0.01482                             | 0.00022 | 0.00563                              | 0.00078 | 90                                   | 97  | 95                                  | 4  | 95                                  | 1   | 113                                  | 16  | 1.00         |
| XX06-06                                                                              | 516   | 357   | 1.45 | 0.04828                              | 0.00340 | 0.10681                             | 0.00736 | 0.01605                             | 0.00030 | 0.00620                              | 0.00102 | 113                                  | 158 | 103                                 | 7  | 103                                 | 2   | 125                                  | 20  | 1.00         |
| XX06-07                                                                              | 1107  | 429   | 2.58 | 0.04821                              | 0.00220 | 0.11215                             | 0.00503 | 0.01688                             | 0.00024 | 0.00611                              | 0.00077 | 110                                  | 103 | 108                                 | 5  | 108                                 | 2   | 123                                  | 15  | 1.00         |
| XX06-08                                                                              | 2126  | 1257  | 1.69 | 0.04933                              | 0.00107 | 0.09889                             | 0.00214 | 0.01455                             | 0.00018 | 0.00521                              | 0.00051 | 164                                  | 52  | 96                                  | 2  | 93                                  | 1   | 105                                  | 10  | 0.97         |
| XX06-09                                                                              | 7149  | 1048  | 6.82 | 0.04928                              | 0.00162 | 0.10048                             | 0.00322 | 0.01480                             | 0.00020 | 0.00466                              | 0.00061 | 161                                  | 78  | 97                                  | 3  | 95                                  | 1   | 94                                   | 12  | 0.98         |
| XX06-10                                                                              | 1429  | 429   | 3.33 | 0.05409                              | 0.00209 | 0.10815                             | 0.00413 | 0.01451                             | 0.00020 | 0.00505                              | 0.00046 | 375                                  | 89  | 104                                 | 4  | 93                                  | 1   | 102                                  | 9   | 0.89         |
| XX06-11                                                                              | 1026  | 388   | 2.65 | 0.04751                              | 0.00226 | 0.09668                             | 0.00455 | 0.01477                             | 0.00021 | 0.00556                              | 0.00084 | 75                                   | 105 | 94                                  | 4  | 95                                  | 1   | 112                                  | 17  | 1.01         |
| XX06-12                                                                              | 1604  | 735   | 2.18 | 0.04883                              | 0.00157 | 0.09881                             | 0.00316 | 0.01468                             | 0.00020 | 0.00482                              | 0.00065 | 140                                  | 77  | 96                                  | 3  | 94                                  | 1   | 97                                   | 13  | 0.98         |
| XX06-13                                                                              | 2349  | 558   | 4.21 | 0.04930                              | 0.00175 | 0.09956                             | 0.00349 | 0.01465                             | 0.00020 | 0.00539                              | 0.00085 | 162                                  | 84  | 96                                  | 3  | 94                                  | 1   | 109                                  | 17  | 0.98         |
| XX06-14                                                                              | 285   | 138   | 2.06 | 0.04802                              | 0.00661 | 0.12664                             | 0.01712 | 0.01916                             | 0.00054 | 0.00602                              | 0.00167 | 100                                  | 276 | 121                                 | 15 | 122                                 | 3   | 121                                  | 34  | 1.01         |
| XX06-15                                                                              | 1153  | 334   | 3.45 | 0.04802                              | 0.00298 | 0.09778                             | 0.00595 | 0.01477                             | 0.00025 | 0.00458                              | 0.00099 | 100                                  | 139 | 95                                  | 6  | 95                                  | 2   | 92                                   | 20  | 1.00         |
| XX06-16                                                                              | 661   | 353   | 1.87 | 0.04789                              | 0.00246 | 0.09742                             | 0.00493 | 0.01476                             | 0.00022 | 0.00566                              | 0.00108 | 94                                   | 115 | 94                                  | 5  | 94                                  | 1   | 114                                  | 22  | 1.00         |
| XX06-18                                                                              | 919   | 473   | 1.95 | 0.04894                              | 0.00155 | 0.14164                             | 0.00445 | 0.02100                             | 0.00028 | 0.00671                              | 0.00107 | 145                                  | 76  | 135                                 | 4  | 134                                 | 2   | 135                                  | 21  | 0.99         |
| XX06-19                                                                              | 1850  | 452   | 4.09 | 0.04942                              | 0.00422 | 0.09795                             | 0.00811 | 0.01438                             | 0.00035 | 0.00392                              | 0.00133 | 168                                  | 194 | 95                                  | 8  | 92                                  | 2   | 79                                   | 27  | 0.97         |
| XX06-20                                                                              | 294   | 207   | 1.42 | 0.04775                              | 0.00496 | 0.09656                             | 0.00985 | 0.01467                             | 0.00034 | 0.00484                              | 0.00138 | 87                                   | 229 | 94                                  | 9  | 94                                  | 2   | 98                                   | 28  | 1.00         |
| N2, Taozu (Chen et al., 2008)                                                        |       |       |      |                                      |         |                                     |         |                                     |         |                                      |         |                                      |     |                                     |    |                                     |     |                                      |     |              |
| ZJ-23-1                                                                              |       |       |      | 0.09140                              | 0.00091 | 0.04023                             | 0.00035 | 0.00446                             | 0.00002 |                                      |         |                                      |     | 89                                  | 4  | 254                                 | 2   | 90                                   | 0.4 | 2.85         |
| ZJ-23-2                                                                              |       |       |      | 0.34366                              | 0.23684 | 0.01625                             | 0.00176 | 0.00455                             | 0.00061 |                                      |         |                                      |     | 300                                 | ## | 104                                 | 11  | 92                                   | 12  | 0.35         |
| ZJ-23-3                                                                              |       |       |      | 0.09035                              | 0.00311 | 0.01423                             | 0.00013 | 0.00517                             | 0.00009 |                                      |         |                                      |     | 88                                  | 3  | 91                                  | 0.8 | 104                                  | 2   | 1.03         |
| ZJ-23-4                                                                              |       |       |      | 0.08951                              | 0.00252 | 0.01364                             | 0.00013 | 0.00433                             | 0.00003 |                                      |         |                                      |     | 87                                  | 2  | 87                                  | 0.8 | 87                                   | 0.7 | 1.00         |
| ZJ-23-5                                                                              |       |       |      | 0.09312                              | 0.00265 | 0.01366                             | 0.00013 | 0.00432                             | 0.00003 |                                      |         |                                      |     | 90                                  | 2  | 88                                  | 0.8 | 87                                   | 0.7 | 0.98         |
| ZJ-23-6                                                                              |       |       |      | 0.09211                              | 0.00088 | 0.01391                             | 0.00012 | 0.00448                             | 0.00002 |                                      |         |                                      |     | 90                                  | 1  | 89                                  | 0.8 | 90                                   | 0.4 | 0.99         |
| ZJ-23-7                                                                              |       |       |      | 0.07573                              | 0.00188 | 0.01193                             | 0.00011 | 0.00482                             | 0.00006 |                                      |         |                                      |     | 74                                  | 2  | 76                                  | 0.7 | 97                                   | 1   | 1.03         |
| ZJ-23-8                                                                              |       |       |      | 0.09392                              | 0.00086 | 0.01342                             | 0.00012 | 0.00426                             | 0.00002 |                                      |         |                                      |     | 91                                  | 1  | 86                                  | 0.8 | 86                                   | 0.4 | 0.95         |
| ZJ-23-9                                                                              |       |       |      | 0.08217                              | 0.00072 | 0.01180                             | 0.00010 | 0.00392                             | 0.00002 |                                      |         |                                      |     | 80                                  | 1  | 76                                  | 0.6 | 79                                   | 0.4 | 0.95         |
| ZJ-23-10                                                                             |       |       |      | 0.07685                              | 0.00067 | 0.01156                             | 0.00010 | 0.00367                             | 0.00002 |                                      |         |                                      |     | 75                                  | 1  | 74                                  | 0.6 | 74                                   | 0.4 | 0.99         |
| ZJ-23-11                                                                             |       |       |      | 0.08574                              | 0.00076 | 0.01213                             | 0.00011 | 0.00469                             | 0.00003 |                                      |         |                                      |     | 84                                  | 1  | 78                                  | 0.7 | 95                                   | 0.6 | 0.93         |
| ZJ-23-12                                                                             |       |       |      | 0.14579                              | 0.00141 | 0.01489                             | 0.00013 | 0.00572                             | 0.00003 |                                      |         |                                      |     | 138                                 | 1  | 95                                  | 0.8 | 115                                  | 0.6 | 0.69         |
| ZJ-23-13                                                                             |       |       |      | 0.08869                              | 0.00252 | 0.01397                             | 0.00012 | 0.00470                             | 0.00006 |                                      |         |                                      |     | 86                                  | 2  | 89                                  | 0.8 | 95                                   | 1   | 1.03         |
| ZJ-23-14                                                                             |       |       |      | 0.17677                              | 0.00158 | 0.01426                             | 0.00013 | 0.00621                             | 0.00003 |                                      |         |                                      |     | 165                                 | 4  | 91                                  | 0.8 | 125                                  | 0.6 | 0.55         |
| ZJ-23-15                                                                             |       |       |      | 0.08795                              | 0.00264 | 0.01385                             | 0.00012 | 0.00460                             | 0.00009 |                                      |         |                                      |     | 86                                  | 2  | 89                                  | 0.8 | 93                                   | 2   | 1.03         |
| ZJ-23-16                                                                             |       |       |      | 0.08310                              | 0.00074 | 0.01181                             | 0.00010 | 0.00443                             | 0.00002 |                                      |         |                                      |     | 81                                  | 1  | 76                                  | 0.6 | 89                                   | 0.4 | 0.94         |
| ZJ-23-17                                                                             |       |       |      | 0.17045                              | 0.00299 | 0.01361                             | 0.00013 | 0.00401                             | 0.00004 |                                      |         |                                      |     | 160                                 | 3  | 87                                  | 0.8 | 81                                   | 0.7 | 0.54         |
| ZJ-23-18                                                                             |       |       |      | 0.08560                              | 0.00076 | 0.01183                             | 0.00010 | 0.00414                             | 0.00002 |                                      |         |                                      |     | 83                                  | 1  | 76                                  | 0.6 | 84                                   | 0.4 | 0.92         |
| ZJ-23-19                                                                             |       |       |      | 0.08615                              | 0.00077 | 0.01285                             | 0.00011 | 0.00443                             | 0.00002 |                                      |         |                                      |     | 84                                  | 1  | 82                                  | 0.7 | 89                                   | 0.4 | 0.98         |
| ZJ-23-20                                                                             |       |       |      | 0.11021                              | 0.00096 | 0.01222                             | 0.00011 | 0.00435                             | 0.00002 |                                      |         |                                      |     | 106                                 | 4  | 78                                  | 0.7 | 88                                   | 0.4 | 0.74         |
| ZJ-23-21                                                                             |       |       |      | 0.08713                              | 0.00332 | 0.01372                             | 0.00013 | 0.00480                             | 0.00012 |                                      |         |                                      |     | 85                                  | 3  | 88                                  | 0.8 | 97                                   | 2   | 1.04         |
| ZJ-23-22                                                                             |       |       |      | 0.09015                              | 0.00234 | 0.01420                             | 0.00012 | 0.00497                             | 0.00030 |                                      |         |                                      |     | 88                                  | 2  | 91                                  | 0.8 | 9819                                 | 41  | 1.03         |
| ZJ-23-23                                                                             |       |       |      | 0.07504                              | 0.00224 | 0.01182                             | 0.00010 | 0.00497                             | 0.00009 |                                      |         |                                      |     | 73                                  | 2  | 76                                  | 0.7 | 100                                  | 2   | 1.04         |
| ZJ-23-24                                                                             |       |       |      | 0.10390                              | 0.00930 | 0.01303                             | 0.00012 | 0.00527                             | 0.00003 |                                      |         |                                      |     | 100                                 | 1  | 84                                  | 0.8 | 106                                  | 0.6 | 0.84         |
| ZJ-23-25                                                                             |       |       |      | 0.08660                              | 0.00079 | 0.01338                             | 0.00012 | 0.00483                             | 0.00003 |                                      |         |                                      |     | 84                                  | 1  | 86                                  | 0.8 | 97                                   | 0.6 | 1.02         |
| N3, Tangshang, Tiantai (TS01 from Liu et al., 2012; another from Zhang et al., 2018) |       |       |      |                                      |         |                                     |         |                                     |         |                                      |         |                                      |     |                                     |    |                                     |     |                                      |     |              |
| TS01-01                                                                              | 722   | 576   | 1.25 | 0.04937                              | 0.00150 | 0.11738                             | 0.00367 | 0.01725                             | 0.00029 | 0.00515                              | 0.00043 | 165                                  | 73  | 113                                 | 3  | 110                                 | 2   | 104                                  | 9   | 0.97         |
| TS01-02                                                                              | 1346  | 1361  | 0.99 | 0.04955                              | 0.00097 | 0.11870                             | 0.00259 | 0.01738                             | 0.00027 | 0.00518                              | 0.00042 | 174                                  | 47  | 114                                 | 2  | 111                                 | 2   | 104                                  | 8   | 0.97         |
| TS01-03                                                                              | 285   | 131   | 2.18 | 0.05028                              | 0.00367 | 0.12131                             | 0.00874 | 0.01750                             | 0.00038 | 0.00555                              | 0.00054 | 208                                  | 167 | 116                                 | 8  | 112                                 | 2   | 112                                  | 11  | 0.97         |
| TS01-04                                                                              | 426   | 204   | 2.09 | 0.04835                              | 0.00286 | 0.11369                             | 0.00663 | 0.01706                             | 0.00035 | 0.00515                              | 0.00054 | 116                                  | 133 | 109                                 | 6  | 109                                 | 2   | 104                                  | 11  | 1.00         |
| TS01-07                                                                              | 524   | 391   | 1.34 | 0.04794                              | 0.00346 | 0.11874                             | 0.00841 | 0.01797                             | 0.00046 | 0.00482                              | 0.00077 | 96                                   | 162 | 114                                 | 8  | 115                                 | 3   | 97                                   | 15  | 1.01         |
| TS01-08                                                                              | 246   | 181   | 1.35 | 0.04867                              | 0.00303 | 0.11760                             | 0.00724 | 0.01753                             | 0.00037 | 0.00523                              | 0.00065 | 132                                  | 141 | 113                                 | 7  | 112                                 | 2   | 105                                  | 13  | 0.99         |
| TS01-09                                                                              | 874   | 802   | 1.09 | 0.04846                              | 0.00209 | 0.11303                             | 0.00489 | 0.01692                             | 0.00034 | 0.00506                              | 0.00079 | 122                                  | 98  | 109                                 | 4  | 108                                 | 2   | 102                                  | 16  | 0.99         |
| TS01-11                                                                              | 229   | 145   | 1.58 | 0.04841                              | 0.00344 | 0.11796                             | 0.00830 | 0.01768                             | 0.00038 | 0.00548                              | 0.00046 | 119                                  | 160 | 113                                 | 8  | 113                                 | 2   | 110                                  | 9   | 1.00         |
| TS01-12                                                                              | 725   | 351   | 2.07 | 0.04753                              | 0.00196 | 0.11215                             | 0.00465 | 0.01712                             | 0.00031 | 0.00495                              | 0.00043 | 76                                   | 92  | 108                                 | 4  | 109                                 | 2   | 100                                  | 9   | 1.01         |
| TS01-13                                                                              | 896   | 439   | 2.04 | 0.04820                              | 0.00186 | 0.11556                             | 0.00447 | 0.01739                             | 0.00031 | 0.00486                              | 0.00047 | 109                                  | 88  | 111                                 | 4  | 111                                 | 2   | 98                                   | 9   | 1.00         |
| TS01-14                                                                              | 671   | 473   | 1.42 | 0.04855                              | 0.00181 | 0.11862                             | 0.00448 | 0.01773                             | 0.00032 | 0.00517                              | 0.00046 | 126                                  | 86  | 114                                 | 4  | 113                                 | 2   | 104                                  | 9   | 0.99         |



|            |     |     |      |         |         |        |         |       |     |       |     |      |
|------------|-----|-----|------|---------|---------|--------|---------|-------|-----|-------|-----|------|
| 10ZJ125-05 | 266 | 333 | 0.8  | 0.14326 | 0.00315 | 0.0208 | 0.00153 | 135.9 | 4.0 | 133.0 | 2.0 | 0.98 |
| 10ZJ125-06 | 304 | 166 | 1.84 | 0.11422 | 0.00473 | 0.0173 | 0.00154 | 109.8 | 4.9 | 110.5 | 1.7 | 1.01 |
| 10ZJ125-07 | 362 | 283 | 1.28 | 0.14158 | 0.00308 | 0.0212 | 0.00157 | 134.5 | 3.9 | 135.3 | 2.1 | 1.01 |
| 10ZJ125-08 | 448 | 383 | 1.17 | 0.14030 | 0.00295 | 0.0209 | 0.00153 | 133.3 | 3.7 | 133.3 | 2.0 | 1.00 |
| 10ZJ125-09 | 426 | 301 | 1.41 | 0.13748 | 0.00344 | 0.0209 | 0.0016  | 130.8 | 4.2 | 133.3 | 2.1 | 1.02 |
| 10ZJ125-10 | 826 | 310 | 2.67 | 0.11481 | 0.00325 | 0.0177 | 0.00155 | 110.4 | 3.4 | 113.4 | 1.7 | 1.03 |
| 10ZJ125-11 | 366 | 244 | 1.5  | 0.13285 | 0.00373 | 0.0207 | 0.00153 | 126.7 | 4.4 | 131.9 | 2.0 | 1.04 |
| 10ZJ125-12 | 697 | 481 | 1.45 | 0.11084 | 0.00437 | 0.0171 | 0.00151 | 106.7 | 4.4 | 109.5 | 1.6 | 1.03 |
| 10ZJ125-13 | 287 | 272 | 1.05 | 0.14060 | 0.00381 | 0.0206 | 0.00154 | 133.6 | 4.8 | 131.4 | 2.0 | 0.98 |
| 10ZJ125-14 | 167 | 178 | 0.94 | 0.11997 | 0.0061  | 0.0172 | 0.0019  | 115.0 | 6.7 | 110.2 | 2.1 | 0.96 |
| 10ZJ125-15 | 300 | 362 | 0.83 | 0.14162 | 0.00352 | 0.0209 | 0.00152 | 134.5 | 4.4 | 133.5 | 2.0 | 0.99 |
| 10ZJ125-16 | 390 | 331 | 1.18 | 0.12053 | 0.00414 | 0.0176 | 0.00151 | 115.6 | 4.5 | 112.6 | 1.7 | 0.97 |

N4, Jiulipinp, Tiantai (Chen et al., 2008; Liu et al., 2012)

|          |         |         |         |         |         |         |      |    |      |     |      |     |      |
|----------|---------|---------|---------|---------|---------|---------|------|----|------|-----|------|-----|------|
| JL-02-1  | 0.49262 | 0.00425 | 0.06460 | 0.00056 | 0.02012 | 0.00010 | 407  | 6  | 404  | 12  | 403  | 4.1 | 0.99 |
| JL-02-2  | 0.28587 | 0.00246 | 0.03518 | 0.00030 | 0.01234 | 0.00006 | 255  | 4  | 223  | 3.8 | 248  | 2.5 | 0.87 |
| JL-02-3  | 0.27427 | 0.00249 | 0.03574 | 0.00031 | 0.01081 | 0.00006 | 246  | 4  | 226  | 3.8 | 217  | 2.3 | 0.92 |
| JL-02-4  | 0.21204 | 0.00182 | 0.02882 | 0.00025 | 0.00928 | 0.00005 | 195  | 3  | 183  | 3.1 | 187  | 1.9 | 0.94 |
| JL-02-5  | 0.19922 | 0.00170 | 0.02886 | 0.00025 | 0.01033 | 0.00005 | 185  | 3  | 183  | 3.1 | 208  | 2.1 | 0.99 |
| JL-02-6  | 0.20543 | 0.00178 | 0.02875 | 0.00026 | 0.01052 | 0.00005 | 190  | 3  | 183  | 3.2 | 212  | 2.2 | 0.96 |
| JL-02-7  | 0.14241 | 0.00129 | 0.02091 | 0.00018 | 0.00664 | 0.00003 | 135  | 2  | 133  | 2.3 | 134  | 1.4 | 0.99 |
| JL-02-8  | 0.17890 | 0.00155 | 0.01972 | 0.00017 | 0.00734 | 0.00004 | 167  | 3  | 126  | 2.2 | 148  | 1.5 | 0.75 |
| JL-02-9  | 0.14826 | 0.00135 | 0.02045 | 0.00018 | 0.00630 | 0.00003 | 140  | 2  | 131  | 2.3 | 127  | 1.3 | 0.94 |
| JL-02-10 | 0.16663 | 0.00144 | 0.02041 | 0.00018 | 0.00760 | 0.00004 | 157  | 3  | 130  | 2.3 | 153  | 1.6 | 0.83 |
| JL-02-11 | 0.12623 | 0.00109 | 0.01592 | 0.00014 | 0.00571 | 0.00003 | 121  | 2  | 102  | 1.8 | 115  | 1.2 | 0.84 |
| JL-02-12 | 0.24120 | 0.00207 | 0.01674 | 0.00015 | 0.00767 | 0.00004 | 219  | 3  | 107  | 1.9 | 155  | 1.6 | 0.49 |
| JL-02-13 | 0.10553 | 0.00092 | 0.01621 | 0.00014 | 0.00539 | 0.00003 | 102  | 2  | 104  | 1.8 | 109  | 1.1 | 1.02 |
| JL-02-14 | 0.11834 | 0.00102 | 0.01607 | 0.00014 | 0.00525 | 0.00003 | 114  | 2  | 103  | 1.8 | 106  | 1.1 | 0.90 |
| JL-02-15 | 0.10763 | 0.00098 | 0.01509 | 0.00013 | 0.00496 | 0.00003 | 104  | 2  | 97   | 1.7 | 100  | 1.1 | 0.93 |
| JL-02-16 | 0.12531 | 0.00108 | 0.01582 | 0.00014 | 0.00514 | 0.00003 | 120  | 2  | 101  | 1.8 | 104  | 1.1 | 0.84 |
| JL-02-17 | 0.10701 | 0.00093 | 0.01588 | 0.00014 | 0.00526 | 0.00003 | 103  | 2  | 102  | 1.8 | 106  | 1.1 | 0.99 |
| JL-02-18 | 0.13090 | 0.00114 | 0.01572 | 0.00014 | 0.00504 | 0.00003 | 125  | 2  | 101  | 1.8 | 102  | 1   | 0.81 |
| JL-02-19 | 0.11913 | 0.00104 | 0.01559 | 0.00014 | 0.00558 | 0.00003 | 114  | 2  | 100  | 1.8 | 113  | 1.2 | 0.88 |
| JL-02-20 | 0.11871 | 0.00103 | 0.01569 | 0.00014 | 0.00553 | 0.00003 | 114  | 2  | 100  | 1.8 | 111  | 1.1 | 0.88 |
| JL-02-21 | 0.11958 | 0.00105 | 0.01160 | 0.00010 | 0.00418 | 0.00002 | 115  | 2  | 74   | 1.3 | 84   | 0.9 | 0.64 |
| JL-02-22 | 0.27192 | 0.00232 | 0.02218 | 0.00019 | 0.01025 | 0.00005 | 244  | 4  | 141  | 2.4 | 206  | 2.1 | 0.58 |
| JL-02-23 | 0.24503 | 0.00211 | 0.01679 | 0.00015 | 0.00622 | 0.00003 | 223  | 3  | 107  | 1.9 | 125  | 1.3 | 0.48 |
| JL-02-24 | 0.30109 | 0.00260 | 0.01705 | 0.00015 | 0.00776 | 0.00004 | 267  | 4  | 109  | 8.1 | 156  | 1.6 | 0.41 |
| JL-02-25 | 4.21667 | 0.03565 | 0.27246 | 0.00237 | 0.08926 | 0.00045 | 1677 | 14 | 1562 | 28  | 1728 | 17  | 0.93 |
| JL-02-26 | #####   | 0.28665 | 0.31221 | 0.00270 | 0.80703 | 0.00409 | 3607 | 17 | 1752 | 33  | 92   | 7.4 | 0.49 |
| JL-02-27 | #####   | 0.17916 | 0.19409 | 0.00173 | 0.00966 | 0.00005 | 3128 | 17 | 1144 | 33  | 194  | 2   | 0.37 |
| JL-02-28 | 3.00957 | 0.02590 | 0.04084 | 0.00035 | 0.08682 | 0.00045 | 1410 | 13 | 258  | 26  | 1683 | 17  | 0.18 |
| JL-02-29 | 0.68973 | 0.00589 | 0.02189 | 0.00019 | 0.01708 | 0.00009 | 533  | 7  | 140  | 14  | 342  | 3.5 | 0.26 |
| JL-02-30 | 0.60353 | 0.00510 | 0.02605 | 0.00022 | 0.03715 | 0.00019 | 480  | 7  | 166  | 13  | 737  | 7.4 | 0.35 |

|         |     |     |      |         |         |         |         |         |         |         |         |     |     |     |    |     |   |     |    |      |
|---------|-----|-----|------|---------|---------|---------|---------|---------|---------|---------|---------|-----|-----|-----|----|-----|---|-----|----|------|
| GW01-01 | 529 | 221 | 2.39 | 0.04890 | 0.00292 | 0.14053 | 0.00820 | 0.02085 | 0.00036 | 0.00855 | 0.00198 | 143 | 135 | 134 | 7  | 133 | 2 | 172 | 40 | 0.99 |
| GW01-02 | 190 | 84  | 2.27 | 0.04884 | 0.00810 | 0.14074 | 0.02296 | 0.02090 | 0.00069 | 0.00907 | 0.00241 | 140 | 312 | 134 | 20 | 133 | 4 | 182 | 48 | 0.99 |
| GW01-04 | 348 | 199 | 1.75 | 0.04975 | 0.00272 | 0.14429 | 0.00775 | 0.02103 | 0.00035 | 0.00516 | 0.00056 | 183 | 126 | 137 | 7  | 134 | 2 | 104 | 11 | 0.98 |
| GW01-05 | 208 | 82  | 2.54 | 0.05006 | 0.00699 | 0.14418 | 0.01981 | 0.02093 | 0.00059 | 0.00687 | 0.00176 | 198 | 289 | 137 | 18 | 134 | 4 | 138 | 35 | 0.98 |
| GW01-06 | 343 | 154 | 2.23 | 0.04860 | 0.00419 | 0.14239 | 0.01204 | 0.02129 | 0.00045 | 0.00647 | 0.00161 | 129 | 195 | 135 | 11 | 136 | 3 | 130 | 32 | 1.01 |
| GW01-07 | 331 | 174 | 1.90 | 0.04974 | 0.00489 | 0.14215 | 0.01368 | 0.02082 | 0.00051 | 0.00568 | 0.00177 | 183 | 224 | 135 | 12 | 133 | 3 | 114 | 36 | 0.99 |
| GW01-08 | 301 | 120 | 2.51 | 0.04981 | 0.00552 | 0.14212 | 0.01548 | 0.02069 | 0.00051 | 0.00570 | 0.00105 | 186 | 249 | 135 | 14 | 132 | 3 | 115 | 21 | 0.98 |
| GW01-09 | 439 | 217 | 2.02 | 0.04944 | 0.00310 | 0.13991 | 0.00857 | 0.02054 | 0.00038 | 0.00673 | 0.00196 | 169 | 143 | 133 | 8  | 131 | 2 | 136 | 39 | 0.98 |
| GW01-10 | 341 | 101 | 3.37 | 0.04856 | 0.00534 | 0.13884 | 0.01501 | 0.02073 | 0.00048 | 0.00857 | 0.00262 | 127 | 243 | 132 | 13 | 132 | 3 | 172 | 53 | 1.00 |
| GW01-11 | 437 | 201 | 2.17 | 0.04964 | 0.00310 | 0.14177 | 0.00870 | 0.02072 | 0.00036 | 0.00544 | 0.00065 | 178 | 143 | 135 | 8  | 132 | 2 | 110 | 13 | 0.98 |
| GW01-12 | 352 | 192 | 1.83 | 0.04924 | 0.00351 | 0.14162 | 0.00991 | 0.02086 | 0.00041 | 0.00407 | 0.00042 | 159 | 162 | 134 | 9  | 133 | 3 | 82  | 8  | 0.99 |
| GW01-13 | 267 | 167 | 1.60 | 0.04829 | 0.00596 | 0.13925 | 0.01683 | 0.02097 | 0.00063 | 0.00300 | 0.00037 | 114 | 253 | 132 | 15 | 134 | 4 | 61  | 7  | 1.02 |
| GW01-16 | 282 | 152 | 1.85 | 0.04930 | 0.00339 | 0.14191 | 0.00962 | 0.02088 | 0.00036 | 0.00506 | 0.00059 | 162 | 156 | 135 | 9  | 133 | 2 | 102 | 12 | 0.99 |
| GW01-17 | 238 | 124 | 1.92 | 0.04879 | 0.00362 | 0.14078 | 0.01033 | 0.02093 | 0.00036 | 0.00475 | 0.00056 | 138 | 168 | 134 | 9  | 134 | 2 | 96  | 11 | 1.00 |
| GW01-18 | 517 | 323 | 1.60 | 0.04761 | 0.00203 | 0.13774 | 0.00576 | 0.02099 | 0.00031 | 0.00569 | 0.00088 | 80  | 95  | 131 | 5  | 134 | 2 | 115 | 18 | 1.02 |
| GW01-19 | 449 | 167 | 2.69 | 0.04924 | 0.00858 | 0.13868 | 0.02354 | 0.02044 | 0.00086 | 0.00535 | 0.00186 | 159 | 324 | 132 | 21 | 130 | 5 | 108 | 37 | 0.98 |
| GW01-20 | 303 | 160 | 1.90 | 0.04989 | 0.00374 | 0.14125 | 0.01040 | 0.02053 | 0.00039 | 0.00533 | 0.00093 | 190 | 171 | 134 | 9  | 131 | 2 | 107 | 19 | 0.98 |
| GW01-21 | 526 | 205 | 2.56 | 0.04890 | 0.00380 | 0.14047 | 0.01061 | 0.02084 | 0.00044 | 0.00808 | 0.00319 | 143 | 176 | 133 | 9  | 133 | 3 | 163 | 64 | 1.00 |

|         |      |     |      |         |         |         |         |         |         |         |         |     |     |     |    |     |   |     |     |      |
|---------|------|-----|------|---------|---------|---------|---------|---------|---------|---------|---------|-----|-----|-----|----|-----|---|-----|-----|------|
| GW02-01 | 437  | 176 | 2.48 | 0.04964 | 0.00409 | 0.13982 | 0.01126 | 0.02043 | 0.00043 | 0.00765 | 0.00188 | 178 | 187 | 133 | 10 | 130 | 3 | 154 | 38  | 0.98 |
| GW02-02 | 253  | 153 | 1.66 | 0.04853 | 0.00578 | 0.13907 | 0.01623 | 0.02079 | 0.00057 | 0.00676 | 0.00152 | 125 | 252 | 132 | 14 | 133 | 4 | 136 | 31  | 1.01 |
| GW02-03 | 521  | 258 | 2.02 | 0.0495  | 0.00515 | 0.1413  | 0.01431 | 0.02071 | 0.00057 | 0.0058  | 0.00139 | 172 | 233 | 134 | 13 | 132 | 4 | 117 | 28  | 0.99 |
| GW02-04 | 342  | 170 | 2.02 | 0.04865 | 0.00688 | 0.13841 | 0.01913 | 0.02068 | 0.00067 | 0.00669 | 0.00284 | 131 | 284 | 132 | 17 | 132 | 4 | 135 | 57  | 1.00 |
| GW02-05 | 714  | 359 | 1.99 | 0.04866 | 0.00183 | 0.13773 | 0.00512 | 0.02053 | 0.00029 | 0.0044  | 0.00046 | 131 | 87  | 131 | 5  | 131 | 2 | 89  | 9   | 1.00 |
| GW02-06 | 444  | 139 | 3.19 | 0.04739 | 0.00447 | 0.13467 | 0.01248 | 0.02062 | 0.00044 | 0.00545 | 0.00123 | 69  | 209 | 128 | 11 | 132 | 3 | 110 | 25  | 1.03 |
| GW02-07 | 433  | 210 | 2.06 | 0.04933 | 0.00466 | 0.14102 | 0.01295 | 0.02076 | 0.00051 | 0.00585 | 0.00212 | 164 | 214 | 134 | 12 | 132 | 3 | 118 | 43  | 0.99 |
| GW02-08 | 221  | 123 | 1.80 | 0.04891 | 0.00566 | 0.13754 | 0.01562 | 0.0204  | 0.00051 | 0.00594 | 0.00162 | 144 | 250 | 131 | 14 | 130 | 3 | 120 | 33  | 0.99 |
| GW02-09 | 1116 | 366 | 3.05 | 0.05028 | 0.00744 | 0.14154 | 0.02029 | 0.0204  | 0.00085 | 0.00644 | 0.00572 | 208 | 301 | 134 | 18 | 130 | 5 | 130 | 115 | 0.97 |
| GW02-10 | 349  | 199 | 1.76 | 0.04997 | 0.00849 | 0.1397  | 0.02315 | 0.0203  | 0.00084 | 0.00497 | 0.00223 | 194 | 323 | 133 | 21 | 130 | 5 | 100 | 45  | 0.98 |
| GW02-11 | 940  | 500 | 1.88 | 0.04915 | 0.00233 | 0.14182 | 0.00631 | 0.02093 | 0.00044 | 0.00337 | 0.00062 | 155 | 109 | 135 | 6  | 134 | 3 | 68  | 12  | 0.99 |
| GW02-12 | 289  | 144 | 2.01 | 0.04929 | 0.00512 | 0.13959 | 0.0139  | 0.02057 | 0.00066 | 0.00639 | 0.00292 | 162 | 233 | 133 | 12 | 131 | 4 | 129 | 59  | 0.98 |
| GW02-13 | 861  | 226 | 3.82 | 0.04939 | 0.00409 | 0.14036 | 0.01106 | 0.02061 | 0.00059 | 0.00584 | 0.00119 | 166 | 188 | 133 | 10 | 132 | 4 | 118 | 24  | 0.99 |
| GW02-14 | 506  | 222 | 2.28 | 0.0493  | 0.0029  | 0.13992 | 0.00789 | 0.02059 | 0.00043 | 0.00451 | 0.00093 | 162 | 134 | 133 | 7  | 131 | 3 | 91  | 19  | 0.98 |
| GW02-15 | 270  | 134 | 2.01 | 0.04915 | 0.00425 | 0.14036 | 0.01174 | 0.02072 | 0.00053 | 0.00511 | 0.00139 | 155 | 196 | 133 | 10 | 132 | 3 | 103 | 28  | 0.99 |



|          |     |     |      |         |         |         |         |         |         |         |         |     |     |     |    |     |   |     |     |      |
|----------|-----|-----|------|---------|---------|---------|---------|---------|---------|---------|---------|-----|-----|-----|----|-----|---|-----|-----|------|
| GW02-16  | 102 | 54  | 1.90 | 0.04806 | 0.00875 | 0.13992 | 0.02498 | 0.02112 | 0.00079 | 0.00743 | 0.00344 | 102 | 330 | 133 | 22 | 135 | 5 | 150 | 69  | 1.02 |
| GW02-17  | 362 | 197 | 1.84 | 0.04701 | 0.00681 | 0.13786 | 0.01897 | 0.02128 | 0.00102 | 0.00682 | 0.00622 | 50  | 270 | 131 | 17 | 136 | 6 | 137 | 125 | 1.04 |
| GW02-18  | 298 | 153 | 1.95 | 0.04958 | 0.00407 | 0.14165 | 0.01116 | 0.02072 | 0.00054 | 0.00641 | 0.00306 | 175 | 187 | 135 | 10 | 132 | 3 | 129 | 61  | 0.98 |
| GW02-19  | 262 | 119 | 2.19 | 0.04885 | 0.00841 | 0.13891 | 0.02298 | 0.02065 | 0.00105 | 0.00929 | 0.0132  | 141 | 319 | 132 | 20 | 132 | 7 | 187 | 264 | 1.00 |
| GW02-20  | 269 | 127 | 2.11 | 0.04876 | 0.00783 | 0.13922 | 0.02145 | 0.02072 | 0.00099 | 0.01086 | 0.01426 | 136 | 304 | 132 | 19 | 132 | 6 | 218 | 285 | 1.00 |
|          |     |     |      |         |         |         |         |         |         |         |         |     |     |     |    |     |   |     |     |      |
| XST01-01 | 310 | 302 | 1.03 | 0.04850 | 0.00336 | 0.13254 | 0.00894 | 0.01986 | 0.00045 | 0.00447 | 0.00060 | 124 | 156 | 126 | 8  | 127 | 3 | 90  | 12  | 1.01 |
| XST01-02 | 249 | 187 | 1.33 | 0.04945 | 0.00227 | 0.13394 | 0.00605 | 0.01964 | 0.00031 | 0.00569 | 0.00033 | 169 | 107 | 128 | 5  | 125 | 2 | 115 | 7   | 0.98 |
| XST01-03 | 128 | 67  | 1.92 | 0.04765 | 0.00722 | 0.13053 | 0.01948 | 0.01987 | 0.00059 | 0.00562 | 0.00052 | 82  | 283 | 125 | 17 | 127 | 4 | 113 | 10  | 1.02 |
| XST01-04 | 171 | 102 | 1.68 | 0.04782 | 0.00592 | 0.13028 | 0.01582 | 0.01976 | 0.00056 | 0.00580 | 0.00064 | 90  | 251 | 124 | 14 | 126 | 4 | 117 | 13  | 1.02 |
| XST01-05 | 341 | 121 | 2.81 | 0.04901 | 0.00266 | 0.13470 | 0.00722 | 0.01993 | 0.00031 | 0.00609 | 0.00039 | 148 | 124 | 128 | 6  | 127 | 2 | 123 | 8   | 0.99 |
| XST01-06 | 373 | 134 | 2.79 | 0.04881 | 0.00251 | 0.13526 | 0.00687 | 0.02010 | 0.00031 | 0.00616 | 0.00042 | 139 | 117 | 129 | 6  | 128 | 2 | 124 | 8   | 0.99 |
| XST01-08 | 129 | 71  | 1.82 | 0.04985 | 0.00470 | 0.13880 | 0.01289 | 0.02019 | 0.00042 | 0.00715 | 0.00070 | 188 | 214 | 132 | 11 | 129 | 3 | 144 | 14  | 0.98 |
| XST01-09 | 277 | 232 | 1.19 | 0.04937 | 0.00337 | 0.13463 | 0.00894 | 0.01978 | 0.00042 | 0.00822 | 0.00190 | 165 | 155 | 128 | 8  | 126 | 3 | 165 | 38  | 0.98 |
| XST01-10 | 985 | 485 | 2.03 | 0.05307 | 0.00117 | 0.15150 | 0.00337 | 0.02071 | 0.00027 | 0.00664 | 0.00057 | 332 | 51  | 143 | 3  | 132 | 2 | 134 | 11  | 0.92 |
| XST01-11 | 153 | 107 | 1.43 | 0.04891 | 0.00358 | 0.13433 | 0.00970 | 0.01992 | 0.00036 | 0.00681 | 0.00056 | 144 | 166 | 128 | 9  | 127 | 2 | 137 | 11  | 0.99 |
| XST01-12 | 162 | 132 | 1.23 | 0.04974 | 0.00525 | 0.13748 | 0.01418 | 0.02004 | 0.00054 | 0.00659 | 0.00084 | 183 | 237 | 131 | 13 | 128 | 3 | 133 | 17  | 0.98 |
| XST01-13 | 144 | 91  | 1.58 | 0.04951 | 0.00367 | 0.13781 | 0.01006 | 0.02019 | 0.00036 | 0.00717 | 0.00070 | 172 | 169 | 131 | 9  | 129 | 2 | 144 | 14  | 0.98 |
| XST01-14 | 433 | 181 | 2.40 | 0.04761 | 0.00957 | 0.13358 | 0.02612 | 0.02035 | 0.00100 | 0.01269 | 0.00684 | 80  | 354 | 127 | 23 | 130 | 6 | 255 | 137 | 1.02 |
| XST01-15 | 641 | 237 | 2.71 | 0.04728 | 0.00404 | 0.13165 | 0.01094 | 0.02020 | 0.00049 | 0.00737 | 0.00142 | 63  | 192 | 126 | 10 | 129 | 3 | 148 | 28  | 1.02 |
| XST01-16 | 296 | 131 | 2.26 | 0.04945 | 0.00365 | 0.13459 | 0.00971 | 0.01974 | 0.00039 | 0.00787 | 0.00125 | 169 | 168 | 128 | 9  | 126 | 2 | 158 | 25  | 0.98 |
| XST01-17 | 139 | 136 | 1.02 | 0.04833 | 0.00861 | 0.13268 | 0.02299 | 0.01990 | 0.00087 | 0.00907 | 0.00315 | 115 | 327 | 127 | 21 | 127 | 5 | 182 | 63  | 1.00 |
| XST01-18 | 646 | 257 | 2.51 | 0.04883 | 0.00214 | 0.13292 | 0.00567 | 0.01974 | 0.00030 | 0.00940 | 0.00193 | 140 | 101 | 127 | 5  | 126 | 2 | 189 | 39  | 0.99 |
| XST01-19 | 469 | 303 | 1.55 | 0.04969 | 0.00240 | 0.13674 | 0.00640 | 0.01996 | 0.00034 | 0.00795 | 0.00145 | 181 | 112 | 130 | 6  | 127 | 2 | 160 | 29  | 0.98 |
| XST01-20 | 313 | 103 | 3.05 | 0.04838 | 0.00403 | 0.13461 | 0.01100 | 0.02018 | 0.00041 | 0.00851 | 0.00172 | 118 | 188 | 128 | 10 | 129 | 3 | 171 | 34  | 1.01 |
| XST01-21 | 220 | 70  | 3.16 | 0.04803 | 0.00711 | 0.13257 | 0.01927 | 0.02002 | 0.00062 | 0.00913 | 0.00244 | 101 | 285 | 126 | 17 | 128 | 4 | 184 | 49  | 1.02 |
|          |     |     |      |         |         |         |         |         |         |         |         |     |     |     |    |     |   |     |     |      |
| XST02-01 | 331 | 198 | 1.67 | 0.04904 | 0.00284 | 0.13553 | 0.00770 | 0.02005 | 0.00036 | 0.00624 | 0.00046 | 150 | 132 | 129 | 7  | 128 | 2 | 126 | 9   | 0.99 |
| XST02-02 | 154 | 139 | 1.11 | 0.04873 | 0.00299 | 0.13473 | 0.00810 | 0.02006 | 0.00035 | 0.00651 | 0.00056 | 135 | 139 | 128 | 7  | 128 | 2 | 131 | 11  | 1.00 |
| XST02-03 | 238 | 200 | 1.19 | 0.04884 | 0.00400 | 0.13455 | 0.01069 | 0.01998 | 0.00047 | 0.00684 | 0.00101 | 140 | 185 | 128 | 10 | 128 | 3 | 138 | 20  | 1.00 |
| XST02-04 | 109 | 98  | 1.12 | 0.04832 | 0.00464 | 0.13525 | 0.01272 | 0.02030 | 0.00047 | 0.00786 | 0.00107 | 115 | 214 | 129 | 11 | 130 | 3 | 158 | 21  | 1.01 |
| XST02-05 | 341 | 261 | 1.31 | 0.04825 | 0.00327 | 0.13591 | 0.00894 | 0.02043 | 0.00043 | 0.00601 | 0.00079 | 112 | 152 | 129 | 8  | 130 | 3 | 121 | 16  | 1.01 |
| XST02-06 | 345 | 243 | 1.42 | 0.04769 | 0.00163 | 0.13279 | 0.00451 | 0.02020 | 0.00028 | 0.00629 | 0.00046 | 84  | 77  | 127 | 4  | 129 | 2 | 127 | 9   | 1.02 |
| XST02-08 | 212 | 153 | 1.38 | 0.04988 | 0.00673 | 0.13968 | 0.01831 | 0.02032 | 0.00073 | 0.00623 | 0.00132 | 189 | 281 | 133 | 16 | 130 | 5 | 126 | 27  | 0.98 |
| XST02-09 | 149 | 123 | 1.21 | 0.04921 | 0.00410 | 0.13770 | 0.01122 | 0.02030 | 0.00045 | 0.00599 | 0.00080 | 158 | 189 | 131 | 10 | 130 | 3 | 121 | 16  | 0.99 |
| XST02-10 | 207 | 226 | 0.91 | 0.04885 | 0.00573 | 0.13570 | 0.01544 | 0.02023 | 0.00067 | 0.00706 | 0.00193 | 141 | 248 | 129 | 14 | 129 | 4 | 142 | 39  | 1.00 |
| XST02-11 | 194 | 139 | 1.40 | 0.05396 | 0.00594 | 0.14702 | 0.01568 | 0.01977 | 0.00060 | 0.00617 | 0.00107 | 369 | 251 | 139 | 14 | 126 | 4 | 124 | 21  | 0.91 |
| XST02-12 | 154 | 135 | 1.14 | 0.04779 | 0.00524 | 0.13153 | 0.01407 | 0.01996 | 0.00055 | 0.00746 | 0.00126 | 89  | 231 | 125 | 13 | 127 | 3 | 150 | 25  | 1.02 |
| XST02-13 | 666 | 556 | 1.20 | 0.04865 | 0.00105 | 0.13629 | 0.00297 | 0.02033 | 0.00026 | 0.00615 | 0.00041 | 131 | 52  | 130 | 3  | 130 | 2 | 124 | 8   | 1.00 |
| XST02-14 | 242 | 184 | 1.32 | 0.05012 | 0.00496 | 0.13762 | 0.01323 | 0.01992 | 0.00055 | 0.00745 | 0.00138 | 201 | 225 | 131 | 12 | 127 | 3 | 150 | 28  | 0.97 |
| XST02-15 | 420 | 335 | 1.25 | 0.04869 | 0.00365 | 0.13553 | 0.00980 | 0.02021 | 0.00048 | 0.00584 | 0.00124 | 133 | 169 | 129 | 9  | 129 | 3 | 118 | 25  | 1.00 |
| XST02-16 | 348 | 209 | 1.66 | 0.04853 | 0.00193 | 0.13561 | 0.00532 | 0.02027 | 0.00029 | 0.00660 | 0.00055 | 125 | 92  | 129 | 5  | 129 | 2 | 133 | 11  | 1.00 |
| XST02-17 | 324 | 208 | 1.56 | 0.04938 | 0.00329 | 0.13541 | 0.00880 | 0.01991 | 0.00041 | 0.00621 | 0.00080 | 166 | 151 | 129 | 8  | 127 | 3 | 125 | 16  | 0.98 |
| XST02-18 | 111 | 97  | 1.14 | 0.04904 | 0.00449 | 0.13637 | 0.01222 | 0.02017 | 0.00045 | 0.00796 | 0.00126 | 150 | 208 | 130 | 11 | 129 | 3 | 160 | 25  | 0.99 |
| XST02-19 | 288 | 167 | 1.72 | 0.05024 | 0.00471 | 0.13957 | 0.01271 | 0.02015 | 0.00052 | 0.00652 | 0.00120 | 206 | 214 | 133 | 11 | 129 | 3 | 131 | 24  | 0.97 |
| XST02-20 | 149 | 139 | 1.07 | 0.04704 | 0.00579 | 0.13195 | 0.01579 | 0.02035 | 0.00064 | 0.00588 | 0.00135 | 51  | 245 | 126 | 14 | 130 | 4 | 118 | 27  | 1.03 |
| XST02-21 | 238 | 167 | 1.42 | 0.04800 | 0.00529 | 0.13325 | 0.01429 | 0.02014 | 0.00059 | 0.00608 | 0.00130 | 99  | 235 | 127 | 13 | 129 | 4 | 123 | 26  | 1.02 |
|          |     |     |      |         |         |         |         |         |         |         |         |     |     |     |    |     |   |     |     |      |
| XST03-01 | 161 | 114 | 1.42 | 0.04844 | 0.00305 | 0.13692 | 0.00850 | 0.02050 | 0.00035 | 0.00724 | 0.00057 | 121 | 142 | 130 | 8  | 131 | 2 | 146 | 11  | 1.01 |
| XST03-02 | 298 | 195 | 1.53 | 0.04901 | 0.00268 | 0.13815 | 0.00737 | 0.02045 | 0.00035 | 0.00782 | 0.00085 | 148 | 125 | 131 | 7  | 130 | 2 | 157 | 17  | 0.99 |
| XST03-03 | 248 | 199 | 1.25 | 0.04969 | 0.00617 | 0.13895 | 0.01670 | 0.02029 | 0.00069 | 0.00655 | 0.00121 | 181 | 264 | 132 | 15 | 129 | 4 | 132 | 24  | 0.98 |
| XST03-04 | 455 | 225 | 2.02 | 0.04997 | 0.00202 | 0.13976 | 0.00553 | 0.02029 | 0.00030 | 0.00704 | 0.00066 | 194 | 96  | 133 | 5  | 129 | 2 | 142 | 13  | 0.97 |
| XST03-05 | 172 | 135 | 1.27 | 0.04960 | 0.00300 | 0.13945 | 0.00825 | 0.02039 | 0.00036 | 0.00685 | 0.00072 | 176 | 138 | 133 | 7  | 130 | 2 | 138 | 14  | 0.98 |



|         |     |     |      |         |         |         |         |         |         |         |         |     |     |     |    |     |   |     |    |      |
|---------|-----|-----|------|---------|---------|---------|---------|---------|---------|---------|---------|-----|-----|-----|----|-----|---|-----|----|------|
| CW01-13 | 241 | 207 | 1.16 | 0.04970 | 0.00287 | 0.12889 | 0.00741 | 0.01881 | 0.00039 | 0.00642 | 0.00065 | 181 | 132 | 123 | 7  | 120 | 2 | 129 | 13 | 0.98 |
| CW01-14 | 108 | 96  | 1.12 | 0.04680 | 0.00626 | 0.12428 | 0.01634 | 0.01928 | 0.00062 | 0.00579 | 0.00083 | 39  | 256 | 119 | 15 | 123 | 4 | 117 | 17 | 1.03 |
| CW01-15 | 83  | 64  | 1.30 | 0.04920 | 0.00688 | 0.12776 | 0.01767 | 0.01884 | 0.00054 | 0.00580 | 0.00073 | 157 | 283 | 122 | 16 | 120 | 3 | 117 | 15 | 0.98 |
| CW01-16 | 274 | 261 | 1.05 | 0.04900 | 0.00396 | 0.12294 | 0.00969 | 0.01820 | 0.00048 | 0.00560 | 0.00109 | 148 | 183 | 118 | 9  | 116 | 3 | 113 | 22 | 0.98 |
| CW01-17 | 254 | 176 | 1.44 | 0.04853 | 0.00471 | 0.13264 | 0.01258 | 0.01984 | 0.00058 | 0.00624 | 0.00101 | 125 | 216 | 126 | 11 | 127 | 4 | 126 | 20 | 1.01 |
| CW01-18 | 197 | 111 | 1.79 | 0.04973 | 0.00492 | 0.12707 | 0.01237 | 0.01854 | 0.00048 | 0.00616 | 0.00090 | 182 | 225 | 121 | 11 | 118 | 3 | 124 | 18 | 0.98 |
| CW01-20 | 249 | 198 | 1.26 | 0.05004 | 0.00270 | 0.13793 | 0.00741 | 0.02000 | 0.00041 | 0.00621 | 0.00080 | 197 | 125 | 131 | 7  | 128 | 3 | 125 | 16 | 0.98 |
| CW01-21 | 83  | 66  | 1.25 | 0.05059 | 0.00658 | 0.13691 | 0.01753 | 0.01964 | 0.00058 | 0.00609 | 0.00103 | 222 | 277 | 130 | 16 | 125 | 4 | 123 | 21 | 0.96 |

|          |      |      |      |         |         |         |         |         |         |         |         |     |     |     |   |     |   |     |    |      |
|----------|------|------|------|---------|---------|---------|---------|---------|---------|---------|---------|-----|-----|-----|---|-----|---|-----|----|------|
| JLP01-01 | 1891 | 1475 | 1.28 | 0.04854 | 0.00103 | 0.12498 | 0.00292 | 0.01868 | 0.00030 | 0.00588 | 0.00047 | 126 | 51  | 120 | 3 | 119 | 2 | 118 | 9  | 0.99 |
| JLP01-03 | 454  | 354  | 1.28 | 0.04948 | 0.00230 | 0.13094 | 0.00607 | 0.01920 | 0.00038 | 0.00609 | 0.00061 | 171 | 108 | 125 | 5 | 123 | 2 | 123 | 12 | 0.98 |
| JLP01-04 | 870  | 417  | 2.09 | 0.04934 | 0.00257 | 0.13051 | 0.00668 | 0.01919 | 0.00041 | 0.00561 | 0.00072 | 164 | 119 | 125 | 6 | 123 | 3 | 113 | 14 | 0.98 |
| JLP01-05 | 1144 | 788  | 1.45 | 0.05041 | 0.00186 | 0.13174 | 0.00489 | 0.01896 | 0.00036 | 0.00538 | 0.00066 | 214 | 88  | 126 | 4 | 121 | 2 | 108 | 13 | 0.96 |
| JLP01-06 | 1699 | 858  | 1.98 | 0.04922 | 0.00116 | 0.12326 | 0.00311 | 0.01817 | 0.00030 | 0.00543 | 0.00051 | 158 | 56  | 118 | 3 | 116 | 2 | 109 | 10 | 0.98 |
| JLP01-07 | 876  | 542  | 1.62 | 0.04839 | 0.00159 | 0.12798 | 0.00424 | 0.01918 | 0.00033 | 0.00557 | 0.00068 | 118 | 76  | 122 | 4 | 122 | 2 | 112 | 14 | 1.00 |
| JLP01-08 | 526  | 288  | 1.83 | 0.04971 | 0.00331 | 0.13297 | 0.00868 | 0.01940 | 0.00047 | 0.00504 | 0.00071 | 181 | 152 | 127 | 8 | 124 | 3 | 102 | 14 | 0.98 |
| JLP01-09 | 768  | 543  | 1.41 | 0.05067 | 0.00138 | 0.13021 | 0.00371 | 0.01864 | 0.00032 | 0.00534 | 0.00056 | 226 | 64  | 124 | 3 | 119 | 2 | 108 | 11 | 0.96 |
| JLP01-10 | 367  | 211  | 1.73 | 0.05025 | 0.00265 | 0.13202 | 0.00687 | 0.01906 | 0.00038 | 0.00536 | 0.00071 | 207 | 122 | 126 | 6 | 122 | 2 | 108 | 14 | 0.97 |
| JLP01-11 | 1019 | 406  | 2.51 | 0.05029 | 0.00186 | 0.13204 | 0.00492 | 0.01905 | 0.00034 | 0.00526 | 0.00047 | 208 | 88  | 126 | 4 | 122 | 2 | 106 | 9  | 0.97 |
| JLP01-12 | 1290 | 660  | 1.95 | 0.05026 | 0.00241 | 0.12763 | 0.00606 | 0.01842 | 0.00038 | 0.00543 | 0.00070 | 207 | 112 | 122 | 5 | 118 | 2 | 109 | 14 | 0.97 |
| JLP01-13 | 428  | 428  | 1.00 | 0.04900 | 0.00391 | 0.12473 | 0.00963 | 0.01845 | 0.00050 | 0.00532 | 0.00120 | 148 | 181 | 119 | 9 | 118 | 3 | 107 | 24 | 0.99 |
| JLP01-14 | 713  | 380  | 1.88 | 0.05116 | 0.00179 | 0.13160 | 0.00470 | 0.01866 | 0.00033 | 0.00530 | 0.00047 | 248 | 82  | 126 | 4 | 119 | 2 | 107 | 9  | 0.94 |
| JLP01-15 | 708  | 514  | 1.38 | 0.04709 | 0.00287 | 0.12331 | 0.00738 | 0.01900 | 0.00044 | 0.00591 | 0.00095 | 54  | 134 | 118 | 7 | 121 | 3 | 119 | 19 | 1.03 |
| JLP01-16 | 137  | 160  | 0.86 | 0.04817 | 0.00357 | 0.12632 | 0.00926 | 0.01903 | 0.00042 | 0.00537 | 0.00063 | 108 | 167 | 121 | 8 | 122 | 3 | 108 | 13 | 1.01 |
| JLP01-17 | 1975 | 1124 | 1.76 | 0.04980 | 0.00149 | 0.12923 | 0.00404 | 0.01882 | 0.00034 | 0.00568 | 0.00068 | 186 | 71  | 123 | 4 | 120 | 2 | 114 | 14 | 0.98 |
| JLP01-18 | 1284 | 800  | 1.61 | 0.04938 | 0.00177 | 0.13256 | 0.00481 | 0.01948 | 0.00036 | 0.00570 | 0.00077 | 166 | 85  | 126 | 4 | 124 | 2 | 115 | 15 | 0.98 |
| JLP01-19 | 1149 | 784  | 1.47 | 0.05056 | 0.00158 | 0.13098 | 0.00421 | 0.01879 | 0.00033 | 0.00570 | 0.00073 | 221 | 74  | 125 | 4 | 120 | 2 | 115 | 15 | 0.96 |
| JLP01-20 | 838  | 536  | 1.56 | 0.04956 | 0.00208 | 0.13019 | 0.00549 | 0.01906 | 0.00037 | 0.00594 | 0.00085 | 174 | 98  | 124 | 5 | 122 | 2 | 120 | 17 | 0.98 |
| JLP01-22 | 345  | 280  | 1.23 | 0.04936 | 0.00263 | 0.13051 | 0.00689 | 0.01918 | 0.00039 | 0.00629 | 0.00106 | 165 | 122 | 125 | 6 | 122 | 2 | 127 | 21 | 0.98 |
| JLP01-23 | 903  | 791  | 1.14 | 0.04943 | 0.00166 | 0.12930 | 0.00445 | 0.01897 | 0.00034 | 0.00615 | 0.00107 | 168 | 80  | 123 | 4 | 121 | 2 | 124 | 21 | 0.98 |

#### N5, Xianju (Li CL et al., 2014)

|              |     |     |      |  |  |          |         |         |         |  |  |  |  |  |  |     |    |  |  |  |
|--------------|-----|-----|------|--|--|----------|---------|---------|---------|--|--|--|--|--|--|-----|----|--|--|--|
| DY11-13-3-1  | 64  | 41  | 1.55 |  |  | 0.17434  | 0.00430 | 0.02262 | 0.00107 |  |  |  |  |  |  | 144 | 7  |  |  |  |
| DY11-13-3-2  | 113 | 97  | 1.16 |  |  | 0.16372  | 0.00207 | 0.02240 | 0.00158 |  |  |  |  |  |  | 143 | 10 |  |  |  |
| DY11-13-3-3  | 178 | 91  | 1.95 |  |  | 0.15186  | 0.00974 | 0.02243 | 0.00110 |  |  |  |  |  |  | 143 | 7  |  |  |  |
| DY11-13-3-4  | 94  | 64  | 1.46 |  |  | 0.15681  | 0.00430 | 0.02232 | 0.00043 |  |  |  |  |  |  | 142 | 3  |  |  |  |
| DY11-13-3-5  | 82  | 62  | 1.31 |  |  | 0.14352  | 0.00613 | 0.02237 | 0.00050 |  |  |  |  |  |  | 143 | 3  |  |  |  |
| DY11-13-3-6  | 78  | 78  | 1.00 |  |  | 0.139305 | 0.04927 | 0.02265 | 0.00089 |  |  |  |  |  |  | 144 | 6  |  |  |  |
| DY11-13-3-7  | 275 | 405 | 2.62 |  |  | 0.128596 | 0.04244 | 0.02332 | 0.00410 |  |  |  |  |  |  | 149 | 26 |  |  |  |
| DY11-13-3-8  | 108 | 73  | 1.49 |  |  | 0.16640  | 0.00780 | 0.02259 | 0.00078 |  |  |  |  |  |  | 144 | 5  |  |  |  |
| DY11-13-3-9  | 29  | 20  | 1.42 |  |  | 0.14843  | 0.01618 | 0.02259 | 0.00186 |  |  |  |  |  |  | 144 | 12 |  |  |  |
| DY11-13-3-10 | 15  | 23  | 0.66 |  |  | 0.15874  | 0.01420 | 0.02157 | 0.00084 |  |  |  |  |  |  | 138 | 5  |  |  |  |
| DY11-13-3-11 | 140 | 84  | 1.66 |  |  | 0.15703  | 0.02945 | 0.02273 | 0.00219 |  |  |  |  |  |  | 145 | 14 |  |  |  |
| DY11-13-3-12 | 143 | 103 | 1.38 |  |  | 0.15254  | 0.00526 | 0.02241 | 0.00065 |  |  |  |  |  |  | 143 | 4  |  |  |  |
| DY11-13-3-13 | 21  | 15  | 1.39 |  |  | 0.17555  | 0.01251 | 0.02132 | 0.00174 |  |  |  |  |  |  | 136 | 11 |  |  |  |
| DY11-13-3-14 | 87  | 77  | 1.13 |  |  | 0.16745  | 0.01082 | 0.02267 | 0.00123 |  |  |  |  |  |  | 144 | 8  |  |  |  |
| DY11-13-3-15 | 21  | 17  | 1.19 |  |  | 0.16513  | 0.02681 | 0.02208 | 0.00088 |  |  |  |  |  |  | 141 | 6  |  |  |  |
| DY11-13-3-16 | 74  | 33  | 2.23 |  |  | 0.18204  | 0.06369 | 0.02327 | 0.00316 |  |  |  |  |  |  | 148 | 20 |  |  |  |
| DY11-13-3-17 | 175 | 76  | 2.29 |  |  | 0.16915  | 0.01576 | 0.02311 | 0.00115 |  |  |  |  |  |  | 147 | 7  |  |  |  |
| DY11-13-3-18 | 59  | 29  | 2.02 |  |  | 0.16372  | 0.01074 | 0.02219 | 0.00121 |  |  |  |  |  |  | 141 | 8  |  |  |  |
| DY11-13-3-19 | 36  | 24  | 1.52 |  |  | 0.15098  | 0.03940 | 0.02234 | 0.00218 |  |  |  |  |  |  | 142 | 14 |  |  |  |
| DY11-13-3-20 | 31  | 41  | 0.75 |  |  | 0.17230  | 0.02986 | 0.02312 | 0.00096 |  |  |  |  |  |  | 147 | 6  |  |  |  |

|              |     |     |      |  |  |          |         |         |         |  |  |  |  |  |  |     |    |  |  |  |
|--------------|-----|-----|------|--|--|----------|---------|---------|---------|--|--|--|--|--|--|-----|----|--|--|--|
| DY11-63-3-1  | 42  | 50  | 0.86 |  |  | 0.15304  | 0.01935 | 0.02220 | 0.00061 |  |  |  |  |  |  | 142 | 4  |  |  |  |
| DY11-63-3-2  | 68  | 59  | 1.15 |  |  | 0.15978  | 0.00855 | 0.02242 | 0.00042 |  |  |  |  |  |  | 143 | 3  |  |  |  |
| DY11-63-3-3  | 167 | 152 | 1.10 |  |  | 0.14564  | 0.00500 | 0.02206 | 0.00030 |  |  |  |  |  |  | 141 | 2  |  |  |  |
| DY11-63-3-4  | 47  | 45  | 1.05 |  |  | 0.13629  | 0.04208 | 0.01919 | 0.00032 |  |  |  |  |  |  | 123 | 2  |  |  |  |
| DY11-63-3-5  | 299 | 288 | 1.04 |  |  | 0.15930  | 0.00323 | 0.02197 | 0.00024 |  |  |  |  |  |  | 140 | 2  |  |  |  |
| DY11-63-3-6  | 110 | 135 | 0.81 |  |  | 0.17077  | 0.01946 | 0.02075 | 0.00047 |  |  |  |  |  |  | 132 | 3  |  |  |  |
| DY11-63-3-7  | 71  | 51  | 1.40 |  |  | 0.15227  | 0.01184 | 0.02191 | 0.00076 |  |  |  |  |  |  | 140 | 5  |  |  |  |
| DY11-63-3-8  | 90  | 92  | 0.98 |  |  | 0.16095  | 0.01219 | 0.02163 | 0.00041 |  |  |  |  |  |  | 138 | 3  |  |  |  |
| DY11-63-3-9  | 57  | 50  | 1.14 |  |  | 0.18277  | 0.04004 | 0.02242 | 0.00014 |  |  |  |  |  |  | 143 | 1  |  |  |  |
| DY11-63-3-10 | 152 | 177 | 0.85 |  |  | 0.16258  | 0.00603 | 0.02191 | 0.00053 |  |  |  |  |  |  | 140 | 3  |  |  |  |
| DY11-63-3-11 | 73  | 92  | 0.80 |  |  | 0.128593 | 0.00808 | 0.02183 | 0.00017 |  |  |  |  |  |  | 139 | 1  |  |  |  |
| DY11-63-3-12 | 84  | 66  | 1.26 |  |  | 0.14287  | 0.01338 | 0.02193 | 0.00054 |  |  |  |  |  |  | 140 | 3  |  |  |  |
| DY11-63-3-13 | 165 | 106 | 1.56 |  |  | 0.18102  | 0.00835 | 0.02311 | 0.00075 |  |  |  |  |  |  | 147 | 5  |  |  |  |
| DY11-63-3-14 | 559 | 312 | 1.79 |  |  | 0.16094  | 0.00239 | 0.02203 | 0.00027 |  |  |  |  |  |  | 140 | 2  |  |  |  |
| DY11-63-3-15 | 44  | 39  | 1.13 |  |  | 0.124096 | 0.03721 | 0.02474 | 0.00063 |  |  |  |  |  |  | 158 | 4  |  |  |  |
| DY11-63-3-16 | 77  | 60  | 1.28 |  |  | 0.19034  | 0.03161 | 0.02153 | 0.00112 |  |  |  |  |  |  | 137 | 7  |  |  |  |
| DY11-63-3-17 | 149 | 123 | 1.21 |  |  | 0.12551  | 0.11490 | 0.02261 | 0.00181 |  |  |  |  |  |  | 144 | 11 |  |  |  |
| DY11-63-3-18 | 651 | 310 | 2.10 |  |  | 0.16626  | 0.00648 | 0.02246 | 0.00037 |  |  |  |  |  |  | 143 | 2  |  |  |  |
| DY11-63-3-19 | 130 | 75  | 1.74 |  |  | 0.12049  | 0.03430 | 0.02429 | 0.00123 |  |  |  |  |  |  | 155 | 8  |  |  |  |
| DY11-63-3-20 | 38  | 20  | 1.91 |  |  | 0.16167  | 0.03380 | 0.02494 | 0.00121 |  |  |  |  |  |  | 159 | 8  |  |  |  |

#### N6, Qingyuan (Duan et al., 2013)

|             |     |     |      |        |        |        |        |        |        |  |  |  |     |   |   |
|-------------|-----|-----|------|--------|--------|--------|--------|--------|--------|--|--|--|-----|---|---|
| 117QY-1-1-1 | 272 | 176 | 1.55 | 0.0519 | 0.0031 | 0.1495 | 0.0092 | 0.0212 | 0.0006 |  |  |  | 141 | 8 | 1 |
|-------------|-----|-----|------|--------|--------|--------|--------|--------|--------|--|--|--|-----|---|---|



|              |      |     |      |        |        |        |        |        |        |     |    |     |   |      |
|--------------|------|-----|------|--------|--------|--------|--------|--------|--------|-----|----|-----|---|------|
| 117QY-1-1-5  | 430  | 170 | 2.53 | 0.0488 | 0.003  | 0.1412 | 0.009  | 0.0213 | 0.0006 | 134 | 8  | 136 | 4 | 1.01 |
| 117QY-1-1-6  | 212  | 330 | 0.64 | 0.0574 | 0.0038 | 0.1695 | 0.0116 | 0.0215 | 0.0006 | 159 | 10 | 137 | 4 | 0.86 |
| 117QY-1-1-7  | 244  | 127 | 1.92 | 0.0543 | 0.0038 | 0.1563 | 0.0118 | 0.0208 | 0.0006 | 147 | 10 | 133 | 4 | 0.90 |
| 117QY-1-1-8  | 360  | 264 | 1.36 | 0.0495 | 0.0027 | 0.1452 | 0.0084 | 0.0215 | 0.0006 | 138 | 7  | 137 | 4 | 0.99 |
| 117QY-1-1-9  | 440  | 190 | 2.31 | 0.0473 | 0.0025 | 0.136  | 0.0079 | 0.0212 | 0.0006 | 129 | 7  | 135 | 4 | 1.05 |
| 117QY-1-1-10 | 194  | 210 | 0.92 | 0.047  | 0.0029 | 0.1379 | 0.0088 | 0.0216 | 0.0007 | 131 | 8  | 138 | 4 | 1.05 |
| 117QY-1-1-11 | 503  | 213 | 2.36 | 0.0519 | 0.0028 | 0.1515 | 0.0093 | 0.0212 | 0.0006 | 143 | 8  | 135 | 4 | 0.94 |
| 117QY-1-1-12 | 162  | 149 | 1.09 | 0.0605 | 0.0043 | 0.1762 | 0.0135 | 0.0214 | 0.0007 | 165 | 12 | 137 | 4 | 0.83 |
| 117QY-1-1-13 | 254  | 194 | 1.31 | 0.0534 | 0.003  | 0.1531 | 0.0099 | 0.0213 | 0.0006 | 145 | 9  | 136 | 4 | 0.94 |
| 117QY-1-1-14 | 416  | 291 | 1.43 | 0.0492 | 0.0027 | 0.1378 | 0.0086 | 0.0211 | 0.0006 | 131 | 8  | 134 | 4 | 1.02 |
| 117QY-1-1-15 | 360  | 163 | 2.22 | 0.0554 | 0.0035 | 0.1597 | 0.0111 | 0.0214 | 0.0006 | 150 | 10 | 136 | 4 | 0.91 |
| 117QY-1-1-16 | 388  | 202 | 1.92 | 0.0508 | 0.0026 | 0.1478 | 0.0089 | 0.0214 | 0.0006 | 140 | 8  | 137 | 4 | 0.98 |
| 117QY-1-1-17 | 239  | 186 | 1.29 | 0.0527 | 0.0027 | 0.1534 | 0.0096 | 0.0213 | 0.0006 | 145 | 8  | 136 | 4 | 0.94 |
| 117QY-1-1-18 | 206  | 277 | 0.74 | 0.0483 | 0.0027 | 0.1418 | 0.0095 | 0.0213 | 0.0006 | 135 | 8  | 136 | 4 | 1.01 |
| 117QY-1-1-19 | 366  | 200 | 1.83 | 0.0508 | 0.0033 | 0.1544 | 0.0123 | 0.0215 | 0.0006 | 146 | 11 | 137 | 4 | 0.94 |
| 117QY-1-1-20 | 515  | 277 | 1.86 | 0.0466 | 0.0022 | 0.1393 | 0.0092 | 0.0214 | 0.0006 | 132 | 8  | 137 | 4 | 1.04 |
| 117QY-1-1-21 | 605  | 433 | 1.4  | 0.0479 | 0.0022 | 0.1427 | 0.0096 | 0.0215 | 0.0006 | 135 | 8  | 137 | 4 | 1.01 |
| 117QY-1-1-22 | 307  | 167 | 1.85 | 0.05   | 0.0039 | 0.1488 | 0.0143 | 0.0213 | 0.0007 | 141 | 13 | 136 | 4 | 0.96 |
| 117QY-1-1-23 | 648  | 379 | 1.71 | 0.0556 | 0.0026 | 0.162  | 0.0111 | 0.021  | 0.0006 | 152 | 10 | 134 | 4 | 0.88 |
| 117QY-1-1-24 | 880  | 282 | 3.12 | 0.045  | 0.0023 | 0.13   | 0.0086 | 0.0212 | 0.0006 | 124 | 8  | 135 | 4 | 1.09 |
| 117QY-1-1-25 | 331  | 195 | 1.69 | 0.0433 | 0.0023 | 0.1323 | 0.0092 | 0.0218 | 0.0006 | 126 | 8  | 139 | 4 | 1.10 |
| 117QY-3-1-1  | 655  | 603 | 1.09 | 0.0504 | 0.0017 | 0.1479 | 0.0079 | 0.0213 | 0.0002 | 140 | 7  | 136 | 1 | 0.97 |
| 117QY-3-1-2  | 271  | 234 | 1.16 | 0.0485 | 0.0025 | 0.136  | 0.0085 | 0.0206 | 0.0003 | 129 | 8  | 132 | 2 | 1.02 |
| 117QY-3-1-3  | 375  | 272 | 1.38 | 0.0539 | 0.0024 | 0.1539 | 0.0086 | 0.0208 | 0.0002 | 145 | 8  | 133 | 1 | 0.92 |
| 117QY-3-1-4  | 189  | 198 | 0.95 | 0.0523 | 0.0025 | 0.1503 | 0.0094 | 0.0208 | 0.0003 | 142 | 8  | 133 | 2 | 0.94 |
| 117QY-3-1-5  | 310  | 686 | 0.45 | 0.0477 | 0.0014 | 0.1364 | 0.0059 | 0.0208 | 0.0002 | 130 | 5  | 132 | 1 | 1.02 |
| 117QY-3-1-6  | 204  | 364 | 0.56 | 0.0536 | 0.002  | 0.1523 | 0.0076 | 0.0206 | 0.0002 | 144 | 7  | 132 | 2 | 0.92 |
| 117QY-3-1-7  | 354  | 275 | 1.28 | 0.0522 | 0.0021 | 0.1481 | 0.0075 | 0.0207 | 0.0002 | 140 | 7  | 132 | 1 | 0.94 |
| 117QY-3-1-8  | 179  | 282 | 0.63 | 0.0509 | 0.0024 | 0.1448 | 0.008  | 0.0208 | 0.0003 | 137 | 7  | 133 | 2 | 0.97 |
| 117QY-3-1-9  | 398  | 298 | 1.34 | 0.0524 | 0.002  | 0.1476 | 0.0093 | 0.0207 | 0.0003 | 140 | 8  | 132 | 2 | 0.94 |
| 117QY-3-1-10 | 201  | 186 | 1.08 | 0.0471 | 0.0027 | 0.1357 | 0.0117 | 0.0211 | 0.0003 | 129 | 10 | 135 | 2 | 1.05 |
| 117QY-3-1-11 | 266  | 434 | 0.61 | 0.0465 | 0.0022 | 0.137  | 0.0121 | 0.0214 | 0.0003 | 130 | 11 | 137 | 2 | 1.05 |
| 117QY-3-1-12 | 241  | 188 | 1.29 | 0.0454 | 0.0023 | 0.1311 | 0.0131 | 0.0211 | 0.0004 | 125 | 12 | 135 | 2 | 1.08 |
| 117QY-3-1-13 | 266  | 552 | 0.48 | 0.0466 | 0.0013 | 0.1333 | 0.0134 | 0.0209 | 0.0002 | 127 | 12 | 133 | 1 | 1.05 |
| 117QY-3-1-14 | 238  | 195 | 1.22 | 0.0454 | 0.0024 | 0.1278 | 0.0119 | 0.021  | 0.0003 | 122 | 11 | 134 | 2 | 1.10 |
| 117QY-3-1-15 | 337  | 379 | 0.89 | 0.0465 | 0.0025 | 0.1348 | 0.0114 | 0.0209 | 0.0004 | 128 | 10 | 134 | 2 | 1.05 |
| 117QY-3-1-16 | 122  | 169 | 0.72 | 0.0511 | 0.0031 | 0.1428 | 0.0107 | 0.0209 | 0.0004 | 136 | 9  | 133 | 3 | 0.98 |
| 117QY-3-1-17 | 497  | 365 | 1.36 | 0.0491 | 0.0019 | 0.1411 | 0.007  | 0.0209 | 0.0004 | 134 | 6  | 133 | 2 | 0.99 |
| 117QY-3-1-18 | 219  | 177 | 1.23 | 0.0473 | 0.0031 | 0.1369 | 0.009  | 0.0213 | 0.0005 | 130 | 8  | 136 | 3 | 1.05 |
| 117QY-3-1-19 | 310  | 446 | 0.69 | 0.0498 | 0.002  | 0.1448 | 0.006  | 0.021  | 0.0004 | 137 | 5  | 134 | 3 | 0.98 |
| 117QY-3-1-20 | 523  | 488 | 1.07 | 0.0543 | 0.0018 | 0.1557 | 0.0053 | 0.0205 | 0.0004 | 147 | 5  | 131 | 3 | 0.89 |
| 117QY-3-1-21 | 227  | 229 | 0.99 | 0.0551 | 0.0028 | 0.1587 | 0.0088 | 0.0208 | 0.0006 | 150 | 8  | 132 | 4 | 0.88 |
| 117QY-3-1-22 | 862  | 518 | 1.66 | 0.0474 | 0.0019 | 0.1364 | 0.0053 | 0.0208 | 0.0006 | 130 | 5  | 133 | 4 | 1.02 |
| 117QY-3-1-23 | 417  | 978 | 0.43 | 0.0501 | 0.002  | 0.1457 | 0.0066 | 0.0213 | 0.0008 | 138 | 6  | 136 | 5 | 0.99 |
| 117QY-3-1-24 | 378  | 361 | 1.05 | 0.0477 | 0.002  | 0.1332 | 0.0075 | 0.0211 | 0.0007 | 127 | 7  | 135 | 5 | 1.06 |
| 117QY-3-1-25 | 255  | 215 | 1.19 | 0.0517 | 0.0026 | 0.1448 | 0.0125 | 0.0206 | 0.0006 | 137 | 11 | 131 | 4 | 0.96 |
| 117QY-4-2-1  | 440  | 595 | 0.74 | 0.0491 | 0.002  | 0.1418 | 0.0075 | 0.0206 | 0.0006 | 135 | 7  | 131 | 4 | 0.97 |
| 117QY-4-2-2  | 201  | 217 | 0.92 | 0.0509 | 0.0028 | 0.1397 | 0.008  | 0.0201 | 0.0006 | 133 | 7  | 128 | 4 | 0.96 |
| 117QY-4-2-3  | 286  | 419 | 0.68 | 0.0498 | 0.0023 | 0.1454 | 0.0074 | 0.0208 | 0.0006 | 138 | 7  | 133 | 4 | 0.96 |
| 117QY-4-2-4  | 207  | 318 | 0.65 | 0.0496 | 0.0028 | 0.1443 | 0.0082 | 0.0213 | 0.0007 | 137 | 7  | 136 | 4 | 0.99 |
| 117QY-4-2-5  | 311  | 429 | 0.73 | 0.0484 | 0.0023 | 0.1358 | 0.0068 | 0.0202 | 0.0006 | 129 | 6  | 129 | 4 | 1.00 |
| 117QY-4-2-6  | 194  | 225 | 0.87 | 0.0504 | 0.0027 | 0.1473 | 0.008  | 0.021  | 0.0007 | 140 | 7  | 134 | 5 | 0.96 |
| 117QY-4-2-7  | 500  | 480 | 1.04 | 0.0503 | 0.0022 | 0.1418 | 0.0063 | 0.0202 | 0.0006 | 135 | 6  | 129 | 4 | 0.96 |
| 117QY-4-2-8  | 85.4 | 123 | 0.69 | 0.0554 | 0.0041 | 0.1622 | 0.0115 | 0.0213 | 0.0007 | 153 | 10 | 136 | 5 | 0.89 |
| 117QY-4-2-9  | 244  | 294 | 0.83 | 0.0475 | 0.0027 | 0.1413 | 0.0084 | 0.0213 | 0.0007 | 134 | 8  | 136 | 4 | 1.01 |
| 117QY-4-2-10 | 250  | 329 | 0.76 | 0.0527 | 0.0029 | 0.1492 | 0.0081 | 0.0203 | 0.0007 | 141 | 7  | 130 | 4 | 0.92 |
| 117QY-4-2-11 | 324  | 395 | 0.82 | 0.0463 | 0.0023 | 0.14   | 0.008  | 0.0216 | 0.0007 | 133 | 7  | 138 | 4 | 1.04 |
| 117QY-4-2-12 | 315  | 426 | 0.74 | 0.0485 | 0.0023 | 0.1441 | 0.0087 | 0.0213 | 0.0006 | 137 | 8  | 136 | 4 | 0.99 |
| 117QY-4-2-13 | 120  | 178 | 0.68 | 0.0587 | 0.0035 | 0.1711 | 0.0133 | 0.0208 | 0.0006 | 160 | 12 | 132 | 4 | 0.83 |
| 117QY-4-2-14 | 213  | 288 | 0.74 | 0.047  | 0.0027 | 0.1331 | 0.0109 | 0.0204 | 0.0006 | 127 | 10 | 130 | 4 | 1.02 |
| 117QY-4-2-15 | 164  | 222 | 0.74 | 0.0482 | 0.0028 | 0.1353 | 0.012  | 0.0205 | 0.0006 | 129 | 11 | 131 | 4 | 1.02 |
| 117QY-4-2-16 | 222  | 327 | 0.68 | 0.0493 | 0.0022 | 0.1382 | 0.0125 | 0.0201 | 0.0006 | 131 | 11 | 128 | 3 | 0.98 |
| 117QY-4-2-17 | 197  | 248 | 0.79 | 0.0465 | 0.0028 | 0.139  | 0.0128 | 0.0215 | 0.0006 | 132 | 11 | 137 | 4 | 1.04 |
| 117QY-4-2-18 | 257  | 322 | 0.8  | 0.049  | 0.0025 | 0.1374 | 0.0099 | 0.0204 | 0.0006 | 131 | 9  | 130 | 4 | 0.99 |
| 117QY-4-2-19 | 292  | 318 | 0.92 | 0.0462 | 0.0023 | 0.1379 | 0.0088 | 0.0214 | 0.0006 | 131 | 8  | 137 | 4 | 1.05 |
| 117QY-4-2-20 | 513  | 536 | 0.96 | 0.0472 | 0.0021 | 0.1347 | 0.0071 | 0.0206 | 0.0006 | 128 | 6  | 131 | 4 | 1.02 |
| 117QY-4-2-21 | 206  | 375 | 0.55 | 0.0477 | 0.0022 | 0.1374 | 0.0082 | 0.0211 | 0.0006 | 131 | 7  | 134 | 4 | 1.02 |
| 117QY-4-2-22 | 216  | 244 | 0.89 | 0.0457 | 0.0029 | 0.1269 | 0.0104 | 0.0202 | 0.0006 | 121 | 9  | 129 | 4 | 1.07 |
| 117QY-4-2-23 | 351  | 361 | 0.97 | 0.0503 | 0.0026 | 0.1449 | 0.0135 | 0.0209 | 0.0006 | 137 | 12 | 133 | 4 | 0.97 |
| 117QY-4-2-24 | 231  | 257 | 0.9  | 0.0531 | 0.0029 | 0.1467 | 0.0157 | 0.02   | 0.0006 | 139 | 14 | 128 | 4 | 0.92 |
| 117QY-4-2-25 | 307  | 307 | 1    | 0.0506 | 0.0026 | 0.1438 | 0.0164 | 0.0204 | 0.0006 | 136 | 15 | 130 | 4 | 0.96 |
| 117QY-4-2-26 | 120  | 155 | 0.78 | 0.0524 | 0.0035 | 0.148  | 0.0164 | 0.0213 | 0.0007 | 140 | 15 | 136 | 4 | 0.97 |
| 117QY-4-2-27 | 301  | 361 | 0.84 | 0.0585 | 0.003  | 0.1628 | 0.0152 | 0.0206 | 0.0006 | 153 | 13 | 131 | 4 | 0.86 |
| 117QY-4-2-28 | 169  | 238 | 0.71 | 0.0518 | 0.0029 | 0.1449 | 0.0133 | 0.0203 | 0.0006 | 137 | 12 | 129 | 4 | 0.94 |
| 117QY-4-2-29 | 194  | 263 | 0.74 | 0.0494 | 0.0025 | 0.1414 | 0.0124 | 0.0209 | 0.0006 | 134 | 11 | 133 | 4 | 0.99 |
| 117QY-10-1-1 | 117  | 117 | 0.99 | 0.0614 | 0.0037 | 0.1689 | 0.0153 | 0.0197 | 0.0006 | 158 | 13 | 126 | 4 | 0.80 |



|               |      |      |      |        |        |        |        |        |        |     |    |     |   |      |
|---------------|------|------|------|--------|--------|--------|--------|--------|--------|-----|----|-----|---|------|
| 117QY-10-1-2  | 249  | 189  | 1.32 | 0.0497 | 0.004  | 0.1343 | 0.0143 | 0.0198 | 0.0007 | 128 | 13 | 126 | 4 | 0.98 |
| 117QY-10-1-3  | 236  | 161  | 1.47 | 0.0582 | 0.0041 | 0.1646 | 0.0173 | 0.0197 | 0.0006 | 155 | 15 | 126 | 4 | 0.81 |
| 117QY-10-1-4  | 175  | 117  | 1.5  | 0.0567 | 0.0035 | 0.1602 | 0.0168 | 0.0199 | 0.0007 | 151 | 15 | 127 | 4 | 0.84 |
| 117QY-10-1-5  | 220  | 176  | 1.25 | 0.0524 | 0.0037 | 0.1532 | 0.0164 | 0.0204 | 0.0006 | 145 | 14 | 130 | 4 | 0.90 |
| 117QY-10-1-6  | 199  | 143  | 1.39 | 0.05   | 0.003  | 0.1419 | 0.0136 | 0.0198 | 0.0006 | 135 | 12 | 127 | 4 | 0.94 |
| 117QY-10-1-7  | 91.8 | 97.6 | 0.94 | 0.059  | 0.0039 | 0.1677 | 0.0171 | 0.0201 | 0.0007 | 157 | 15 | 128 | 4 | 0.82 |
| 117QY-10-1-8  | 95.1 | 98.4 | 0.97 | 0.0529 | 0.0043 | 0.1504 | 0.0172 | 0.0203 | 0.0008 | 142 | 15 | 129 | 5 | 0.91 |
| 117QY-10-1-9  | 120  | 119  | 1.01 | 0.0596 | 0.0038 | 0.1578 | 0.0166 | 0.0197 | 0.0006 | 149 | 15 | 126 | 4 | 0.85 |
| 117QY-10-1-10 | 127  | 114  | 1.11 | 0.0592 | 0.004  | 0.1671 | 0.0169 | 0.0203 | 0.0006 | 157 | 15 | 130 | 4 | 0.83 |
| 117QY-10-1-11 | 147  | 146  | 1.01 | 0.0567 | 0.0033 | 0.1566 | 0.0134 | 0.0203 | 0.0006 | 148 | 12 | 130 | 4 | 0.88 |
| 117QY-10-1-12 | 144  | 146  | 0.99 | 0.0493 | 0.0031 | 0.1358 | 0.0119 | 0.0199 | 0.0006 | 129 | 11 | 127 | 4 | 0.98 |
| 117QY-10-1-13 | 107  | 108  | 0.99 | 0.0604 | 0.0039 | 0.1644 | 0.0142 | 0.0199 | 0.0006 | 155 | 12 | 127 | 4 | 0.82 |
| 117QY-10-1-14 | 148  | 144  | 1.03 | 0.0572 | 0.0034 | 0.16   | 0.0141 | 0.0202 | 0.0007 | 151 | 12 | 129 | 4 | 0.85 |
| 117QY-10-1-15 | 152  | 123  | 1.23 | 0.0557 | 0.0036 | 0.1528 | 0.0138 | 0.0199 | 0.0006 | 144 | 12 | 127 | 4 | 0.88 |
| 117QY-10-1-16 | 111  | 106  | 1.05 | 0.0564 | 0.0037 | 0.154  | 0.0126 | 0.02   | 0.0006 | 145 | 11 | 128 | 4 | 0.88 |
| 117QY-10-1-17 | 114  | 113  | 1.02 | 0.0513 | 0.0042 | 0.1417 | 0.0118 | 0.0202 | 0.0007 | 135 | 10 | 129 | 4 | 0.96 |
| 117QY-10-1-18 | 470  | 278  | 1.69 | 0.0521 | 0.0026 | 0.1459 | 0.0089 | 0.0202 | 0.0006 | 138 | 8  | 129 | 4 | 0.93 |
| 117QY-10-1-19 | 222  | 275  | 0.81 | 0.0604 | 0.0033 | 0.1642 | 0.0111 | 0.0201 | 0.0006 | 154 | 10 | 128 | 4 | 0.83 |
| 117QY-10-1-20 | 264  | 206  | 1.28 | 0.0474 | 0.0028 | 0.1263 | 0.0098 | 0.0198 | 0.0006 | 121 | 9  | 126 | 4 | 1.04 |
| 117QY-10-1-21 | 118  | 113  | 1.04 | 0.0566 | 0.0036 | 0.1593 | 0.0143 | 0.0205 | 0.0006 | 150 | 13 | 131 | 4 | 0.87 |
| 117QY-10-1-22 | 172  | 144  | 1.19 | 0.0526 | 0.0032 | 0.1438 | 0.0121 | 0.02   | 0.0006 | 128 | 4  | 137 | 5 | 1.07 |
| 117QY-10-1-23 | 181  | 124  | 1.45 | 0.0593 | 0.0038 | 0.1658 | 0.014  | 0.0201 | 0.0006 | 128 | 4  | 137 | 4 | 1.07 |
| 117QY-10-1-24 | 127  | 129  | 0.99 | 0.0632 | 0.0048 | 0.1757 | 0.0168 | 0.0201 | 0.0006 | 128 | 4  | 150 | 7 | 1.17 |
| 117QY-10-1-25 | 104  | 104  | 1    | 0.0615 | 0.0039 | 0.1709 | 0.0151 | 0.0202 | 0.0006 | 129 | 4  | 139 | 5 | 1.08 |

N7, Taishun (Duan et al., 2013)

|               |     |     |      |        |        |        |        |        |        |     |    |     |   |      |
|---------------|-----|-----|------|--------|--------|--------|--------|--------|--------|-----|----|-----|---|------|
| 117TS-12-1-1  | 368 | 291 | 1.27 | 0.0497 | 0.0021 | 0.1207 | 0.0055 | 0.0178 | 0.0005 | 116 | 5  | 113 | 3 | 0.97 |
| 117TS-12-1-2  | 308 | 282 | 1.09 | 0.0546 | 0.0031 | 0.1325 | 0.0076 | 0.0178 | 0.0005 | 126 | 7  | 114 | 3 | 0.90 |
| 117TS-12-1-3  | 536 | 415 | 1.29 | 0.0482 | 0.0018 | 0.1183 | 0.0047 | 0.0178 | 0.0005 | 113 | 4  | 114 | 3 | 1.01 |
| 117TS-12-1-4  | 438 | 330 | 1.33 | 0.0579 | 0.0025 | 0.1433 | 0.0067 | 0.018  | 0.0005 | 136 | 6  | 115 | 3 | 0.85 |
| 117TS-12-1-5  | 756 | 440 | 1.72 | 0.0541 | 0.0023 | 0.1315 | 0.0056 | 0.0178 | 0.0005 | 125 | 5  | 114 | 3 | 0.91 |
| 117TS-12-1-6  | 280 | 289 | 0.97 | 0.0546 | 0.0028 | 0.1318 | 0.0066 | 0.0177 | 0.0005 | 126 | 6  | 113 | 3 | 0.90 |
| 117TS-12-1-7  | 359 | 280 | 1.28 | 0.0494 | 0.0021 | 0.122  | 0.0057 | 0.0179 | 0.0005 | 117 | 5  | 114 | 3 | 0.97 |
| 117TS-12-1-8  | 597 | 266 | 2.25 | 0.0511 | 0.0021 | 0.1463 | 0.0064 | 0.0209 | 0.0006 | 139 | 6  | 134 | 4 | 0.96 |
| 117TS-12-1-9  | 432 | 300 | 1.44 | 0.0596 | 0.004  | 0.1474 | 0.0117 | 0.018  | 0.0005 | 140 | 10 | 115 | 3 | 0.82 |
| 117TS-12-1-10 | 443 | 176 | 2.52 | 0.0497 | 0.0026 | 0.1203 | 0.0063 | 0.0177 | 0.0005 | 115 | 6  | 113 | 3 | 0.98 |
| 117TS-12-1-11 | 229 | 239 | 0.96 | 0.0584 | 0.0037 | 0.1454 | 0.009  | 0.0184 | 0.0005 | 138 | 8  | 117 | 3 | 0.85 |
| 117TS-12-1-12 | 256 | 247 | 1.04 | 0.0518 | 0.0022 | 0.1274 | 0.0058 | 0.0178 | 0.0005 | 122 | 5  | 114 | 3 | 0.93 |
| 117TS-12-1-13 | 459 | 311 | 1.48 | 0.0494 | 0.0021 | 0.1218 | 0.0054 | 0.018  | 0.0005 | 117 | 5  | 115 | 3 | 0.98 |
| 117TS-12-1-14 | 720 | 454 | 1.59 | 0.048  | 0.0018 | 0.1193 | 0.0048 | 0.018  | 0.0005 | 114 | 4  | 115 | 3 | 1.01 |
| 117TS-12-1-15 | 263 | 281 | 0.93 | 0.0572 | 0.0027 | 0.1458 | 0.0076 | 0.0183 | 0.0005 | 138 | 7  | 117 | 3 | 0.85 |
| 117TS-12-1-16 | 332 | 290 | 1.15 | 0.058  | 0.0037 | 0.1439 | 0.0093 | 0.0181 | 0.0005 | 136 | 8  | 116 | 3 | 0.85 |
| 117TS-12-1-17 | 316 | 247 | 1.28 | 0.0556 | 0.0032 | 0.1392 | 0.008  | 0.0182 | 0.0005 | 132 | 7  | 116 | 3 | 0.88 |
| 117TS-12-1-18 | 539 | 365 | 1.48 | 0.0516 | 0.0021 | 0.1287 | 0.0056 | 0.018  | 0.0005 | 123 | 5  | 115 | 3 | 0.93 |
| 117TS-12-1-19 | 471 | 389 | 1.21 | 0.0482 | 0.0023 | 0.1212 | 0.0056 | 0.0185 | 0.0005 | 116 | 5  | 118 | 3 | 1.02 |
| 117TS-12-1-20 | 654 | 432 | 1.51 | 0.0496 | 0.002  | 0.123  | 0.0053 | 0.018  | 0.0005 | 118 | 5  | 115 | 3 | 0.97 |
| 117TS-12-1-21 | 479 | 348 | 1.38 | 0.0532 | 0.0022 | 0.1293 | 0.0056 | 0.0178 | 0.0005 | 123 | 5  | 114 | 3 | 0.93 |
| 117TS-12-1-22 | 663 | 399 | 1.66 | 0.0496 | 0.0022 | 0.12   | 0.0055 | 0.0178 | 0.0005 | 115 | 5  | 113 | 3 | 0.98 |
| 117TS-12-1-23 | 589 | 314 | 1.87 | 0.0532 | 0.0028 | 0.1364 | 0.0088 | 0.0183 | 0.0005 | 130 | 8  | 117 | 3 | 0.90 |
| 117TS-12-1-24 | 420 | 300 | 1.4  | 0.0511 | 0.0025 | 0.126  | 0.0062 | 0.018  | 0.0005 | 121 | 6  | 115 | 3 | 0.95 |
| 117TS-12-1-25 | 272 | 222 | 1.23 | 0.0625 | 0.0049 | 0.1508 | 0.0116 | 0.018  | 0.0005 | 143 | 10 | 115 | 3 | 0.80 |

|              |      |     |      |        |        |        |        |        |        |     |    |     |   |      |
|--------------|------|-----|------|--------|--------|--------|--------|--------|--------|-----|----|-----|---|------|
| 117TS-3-1-1  | 280  | 273 | 1.03 | 0.0527 | 0.0042 | 0.1247 | 0.01   | 0.0173 | 0.0005 | 119 | 9  | 110 | 3 | 0.92 |
| 117TS-3-1-2  | 432  | 363 | 1.19 | 0.0544 | 0.0024 | 0.1315 | 0.0059 | 0.0175 | 0.0005 | 125 | 5  | 112 | 3 | 0.90 |
| 117TS-3-1-3  | 470  | 375 | 1.25 | 0.0485 | 0.0021 | 0.1156 | 0.0052 | 0.0172 | 0.0005 | 111 | 5  | 110 | 3 | 0.99 |
| 117TS-3-1-4  | 368  | 329 | 1.12 | 0.0513 | 0.0023 | 0.1271 | 0.0056 | 0.0181 | 0.0005 | 121 | 5  | 115 | 3 | 0.95 |
| 117TS-3-1-5  | 595  | 455 | 1.31 | 0.0504 | 0.0018 | 0.1256 | 0.0048 | 0.0179 | 0.0005 | 120 | 4  | 114 | 3 | 0.95 |
| 117TS-3-1-6  | 561  | 389 | 1.44 | 0.0575 | 0.0023 | 0.1411 | 0.0058 | 0.0177 | 0.0005 | 134 | 5  | 113 | 3 | 0.84 |
| 117TS-3-1-7  | 1859 | 817 | 2.28 | 0.0528 | 0.0026 | 0.1263 | 0.006  | 0.0174 | 0.0005 | 121 | 5  | 111 | 3 | 0.92 |
| 117TS-3-1-8  | 342  | 309 | 1.1  | 0.0547 | 0.0037 | 0.1276 | 0.0082 | 0.0173 | 0.0005 | 122 | 7  | 111 | 3 | 0.91 |
| 117TS-3-1-9  | 848  | 470 | 1.8  | 0.0501 | 0.0019 | 0.1179 | 0.0046 | 0.0171 | 0.0004 | 113 | 4  | 109 | 3 | 0.96 |
| 117TS-3-1-10 | 806  | 456 | 1.77 | 0.0526 | 0.0022 | 0.1252 | 0.0052 | 0.0172 | 0.0005 | 120 | 5  | 110 | 3 | 0.92 |
| 117TS-3-1-11 | 521  | 431 | 1.21 | 0.0498 | 0.0021 | 0.1218 | 0.0053 | 0.0177 | 0.0005 | 117 | 5  | 113 | 3 | 0.97 |
| 117TS-3-1-12 | 524  | 392 | 1.34 | 0.0502 | 0.0022 | 0.122  | 0.0053 | 0.0177 | 0.0005 | 117 | 5  | 113 | 3 | 0.97 |
| 117TS-3-1-13 | 289  | 304 | 0.95 | 0.0573 | 0.003  | 0.1367 | 0.0069 | 0.0174 | 0.0005 | 130 | 6  | 111 | 3 | 0.85 |
| 117TS-3-1-14 | 520  | 354 | 1.47 | 0.0558 | 0.0035 | 0.1345 | 0.0084 | 0.0175 | 0.0005 | 128 | 8  | 112 | 3 | 0.88 |
| 117TS-3-1-15 | 418  | 343 | 1.22 | 0.0554 | 0.0052 | 0.1381 | 0.0148 | 0.0178 | 0.0005 | 131 | 13 | 114 | 3 | 0.87 |
| 117TS-3-1-16 | 378  | 334 | 1.13 | 0.0517 | 0.0021 | 0.1285 | 0.0054 | 0.0179 | 0.0005 | 123 | 5  | 115 | 3 | 0.93 |
| 117TS-3-1-17 | 950  | 460 | 2.07 | 0.0531 | 0.0028 | 0.1278 | 0.0064 | 0.0177 | 0.0005 | 122 | 6  | 113 | 3 | 0.93 |
| 117TS-3-1-18 | 352  | 311 | 1.13 | 0.0508 | 0.0024 | 0.1214 | 0.0055 | 0.0175 | 0.0005 | 116 | 5  | 112 | 3 | 0.97 |
| 117TS-3-1-19 | 460  | 383 | 1.2  | 0.0537 | 0.0024 | 0.1329 | 0.0058 | 0.0181 | 0.0005 | 127 | 5  | 116 | 3 | 0.91 |
| 117TS-3-1-20 | 464  | 310 | 1.5  | 0.0559 | 0.0037 | 0.1359 | 0.0083 | 0.0179 | 0.0005 | 129 | 7  | 114 | 3 | 0.88 |
| 117TS-3-1-21 | 528  | 415 | 1.27 | 0.0526 | 0.0023 | 0.1288 | 0.0057 | 0.0179 | 0.0005 | 123 | 5  | 114 | 3 | 0.93 |
| 117TS-3-1-22 | 457  | 342 | 1.34 | 0.0587 | 0.0043 | 0.1424 | 0.0094 | 0.018  | 0.0005 | 135 | 8  | 115 | 3 | 0.85 |
| 117TS-3-1-23 | 310  | 294 | 1.05 | 0.0531 | 0.0025 | 0.1278 | 0.0058 | 0.0176 | 0.0005 | 122 | 5  | 112 | 3 | 0.92 |
| 117TS-3-1-24 | 378  | 314 | 1.2  | 0.0508 | 0.0024 | 0.1249 | 0.0058 | 0.018  | 0.0005 | 120 | 5  | 115 | 3 | 0.96 |
| 117TS-3-1-25 | 481  | 364 | 1.32 | 0.0517 | 0.0024 | 0.1264 | 0.0056 | 0.0179 | 0.0005 | 121 | 5  | 115 | 3 | 0.95 |

|             |     |     |      |       |        |        |        |        |        |     |    |     |   |      |
|-------------|-----|-----|------|-------|--------|--------|--------|--------|--------|-----|----|-----|---|------|
| 117TS-2-1-1 | 208 | 198 | 1.05 | 0.064 | 0.0057 | 0.1499 | 0.0137 | 0.0172 | 0.0005 | 142 | 12 | 110 | 3 | 0.77 |
|-------------|-----|-----|------|-------|--------|--------|--------|--------|--------|-----|----|-----|---|------|



|              |      |     |      |        |        |        |        |        |        |     |    |     |   |      |
|--------------|------|-----|------|--------|--------|--------|--------|--------|--------|-----|----|-----|---|------|
| 117TS-2-1-2  | 627  | 358 | 1.75 | 0.0507 | 0.0035 | 0.1211 | 0.008  | 0.0177 | 0.0005 | 116 | 7  | 113 | 3 | 0.97 |
| 117TS-2-1-3  | 426  | 345 | 1.23 | 0.0543 | 0.0038 | 0.1289 | 0.0082 | 0.0176 | 0.0005 | 123 | 7  | 113 | 3 | 0.92 |
| 117TS-2-1-4  | 933  | 454 | 2.05 | 0.052  | 0.0019 | 0.1238 | 0.0046 | 0.0174 | 0.0005 | 119 | 4  | 111 | 3 | 0.93 |
| 117TS-2-1-5  | 481  | 336 | 1.43 | 0.0583 | 0.0047 | 0.1405 | 0.012  | 0.0175 | 0.0005 | 134 | 11 | 112 | 3 | 0.84 |
| 117TS-2-1-6  | 636  | 410 | 1.55 | 0.0546 | 0.0028 | 0.1286 | 0.0061 | 0.0172 | 0.0005 | 123 | 6  | 110 | 3 | 0.89 |
| 117TS-2-1-7  | 1022 | 514 | 1.99 | 0.0538 | 0.0026 | 0.127  | 0.0061 | 0.0172 | 0.0005 | 121 | 6  | 110 | 3 | 0.91 |
| 117TS-2-1-8  | 309  | 275 | 1.12 | 0.0602 | 0.0035 | 0.1424 | 0.008  | 0.0174 | 0.0005 | 135 | 7  | 111 | 3 | 0.82 |
| 117TS-2-1-9  | 327  | 313 | 1.05 | 0.0547 | 0.0033 | 0.1249 | 0.0077 | 0.0166 | 0.0005 | 119 | 7  | 106 | 3 | 0.89 |
| 117TS-2-1-10 | 411  | 340 | 1.21 | 0.0537 | 0.0026 | 0.1293 | 0.0061 | 0.0176 | 0.0005 | 123 | 6  | 113 | 3 | 0.92 |
| 117TS-2-1-11 | 407  | 300 | 1.35 | 0.0574 | 0.0035 | 0.1357 | 0.0082 | 0.0176 | 0.0005 | 129 | 7  | 112 | 3 | 0.87 |
| 117TS-2-1-12 | 758  | 403 | 1.88 | 0.0516 | 0.002  | 0.1398 | 0.0055 | 0.0197 | 0.0005 | 133 | 5  | 126 | 3 | 0.95 |
| 117TS-2-1-13 | 1576 | 605 | 2.61 | 0.0509 | 0.0018 | 0.1181 | 0.0042 | 0.0169 | 0.0004 | 113 | 4  | 108 | 3 | 0.96 |
| 117TS-2-1-14 | 1292 | 484 | 2.67 | 0.0591 | 0.0039 | 0.1411 | 0.0094 | 0.0175 | 0.0005 | 134 | 8  | 112 | 3 | 0.84 |
| 117TS-2-1-15 | 419  | 309 | 1.36 | 0.0585 | 0.005  | 0.1441 | 0.0145 | 0.0176 | 0.0005 | 137 | 13 | 112 | 3 | 0.82 |
| 117TS-2-1-16 | 360  | 286 | 1.26 | 0.0583 | 0.0034 | 0.1412 | 0.0083 | 0.0177 | 0.0005 | 134 | 7  | 113 | 3 | 0.84 |
| 117TS-2-1-17 | 1215 | 558 | 2.18 | 0.0508 | 0.002  | 0.1224 | 0.005  | 0.0176 | 0.0005 | 117 | 5  | 113 | 3 | 0.97 |
| 117TS-2-1-18 | 214  | 336 | 0.64 | 0.0522 | 0.0025 | 0.1505 | 0.0072 | 0.021  | 0.0006 | 142 | 6  | 134 | 4 | 0.94 |
| 117TS-2-1-19 | 428  | 320 | 1.34 | 0.0524 | 0.0033 | 0.1247 | 0.008  | 0.0175 | 0.0005 | 119 | 7  | 112 | 3 | 0.94 |
| 117TS-2-1-20 | 1078 | 522 | 2.06 | 0.0544 | 0.0034 | 0.1268 | 0.0073 | 0.0171 | 0.0005 | 121 | 7  | 109 | 3 | 0.90 |
| 117TS-2-1-21 | 1617 | 625 | 2.59 | 0.0533 | 0.0023 | 0.1292 | 0.0054 | 0.0178 | 0.0005 | 123 | 5  | 114 | 3 | 0.93 |
| 117TS-2-1-22 | 777  | 439 | 1.77 | 0.0549 | 0.0026 | 0.1329 | 0.0057 | 0.0178 | 0.0005 | 127 | 5  | 114 | 3 | 0.90 |
| 117TS-2-1-23 | 835  | 411 | 2.03 | 0.051  | 0.0019 | 0.1397 | 0.0056 | 0.0199 | 0.0005 | 133 | 5  | 127 | 3 | 0.95 |

# Fujian province

N8, Shouning (Duan et al., 2013)

|              |       |      |      |        |        |        |        |        |        |     |    |     |   |      |
|--------------|-------|------|------|--------|--------|--------|--------|--------|--------|-----|----|-----|---|------|
| 117SN-3-1-1  | 238   | 230  | 1.04 | 0.0496 | 0.0021 | 0.149  | 0.0065 | 0.0219 | 0.0006 | 141 | 6  | 140 | 4 | 0.99 |
| 117SN-3-1-2  | 227   | 243  | 0.94 | 0.0484 | 0.0019 | 0.1513 | 0.0063 | 0.0227 | 0.0006 | 143 | 6  | 145 | 4 | 1.01 |
| 117SN-3-1-3  | 129   | 152  | 0.85 | 0.0499 | 0.0025 | 0.1516 | 0.0078 | 0.0223 | 0.0006 | 143 | 7  | 142 | 4 | 0.99 |
| 117SN-3-1-4  | 140   | 185  | 0.76 | 0.0558 | 0.0039 | 0.1738 | 0.0119 | 0.0228 | 0.0007 | 163 | 10 | 145 | 4 | 0.89 |
| 117SN-3-1-5  | 177   | 253  | 0.7  | 0.0491 | 0.0019 | 0.1524 | 0.0063 | 0.0226 | 0.0006 | 144 | 6  | 144 | 4 | 1.00 |
| 117SN-3-1-6  | 253   | 319  | 0.79 | 0.0495 | 0.0019 | 0.1541 | 0.0063 | 0.0228 | 0.0006 | 146 | 6  | 146 | 4 | 1.00 |
| 117SN-3-1-7  | 240   | 297  | 0.81 | 0.0492 | 0.002  | 0.1495 | 0.0064 | 0.0221 | 0.0006 | 141 | 6  | 141 | 4 | 1.00 |
| 117SN-3-1-8  | 218   | 219  | 1    | 0.0493 | 0.0021 | 0.1508 | 0.0065 | 0.0224 | 0.0006 | 143 | 6  | 143 | 4 | 1.00 |
| 117SN-3-1-9  | 128   | 186  | 0.69 | 0.0494 | 0.0026 | 0.1541 | 0.0084 | 0.0228 | 0.0006 | 146 | 7  | 145 | 4 | 0.99 |
| 117SN-3-1-10 | 104   | 155  | 0.67 | 0.0475 | 0.0022 | 0.1441 | 0.0069 | 0.0221 | 0.0006 | 137 | 6  | 141 | 4 | 1.03 |
| 117SN-3-1-11 | 163   | 200  | 0.81 | 0.0559 | 0.0028 | 0.1743 | 0.0097 | 0.0225 | 0.0006 | 163 | 8  | 143 | 4 | 0.88 |
| 117SN-3-1-12 | 332   | 1089 | 0.3  | 0.0481 | 0.0014 | 0.1703 | 0.0057 | 0.0256 | 0.0007 | 160 | 5  | 163 | 4 | 1.02 |
| 117SN-3-1-13 | 211   | 297  | 0.71 | 0.0495 | 0.0019 | 0.1565 | 0.0068 | 0.0229 | 0.0007 | 148 | 6  | 146 | 4 | 0.99 |
| 117SN-3-1-14 | 595   | 454  | 1.31 | 0.0484 | 0.0016 | 0.1496 | 0.0058 | 0.0224 | 0.0006 | 142 | 5  | 143 | 4 | 1.01 |
| 117SN-3-1-15 | 404   | 680  | 0.59 | 0.0478 | 0.0014 | 0.1688 | 0.0061 | 0.0255 | 0.0007 | 158 | 5  | 163 | 4 | 1.03 |
| 117SN-3-1-16 | 385   | 410  | 0.94 | 0.0477 | 0.0018 | 0.1486 | 0.006  | 0.0227 | 0.0007 | 141 | 5  | 145 | 4 | 1.03 |
| 117SN-3-1-17 | 301   | 325  | 0.93 | 0.0496 | 0.0019 | 0.1509 | 0.0062 | 0.022  | 0.0006 | 143 | 5  | 141 | 4 | 0.99 |
| 117SN-3-1-18 | 222   | 216  | 1.03 | 0.058  | 0.0024 | 0.1778 | 0.0079 | 0.0223 | 0.0006 | 166 | 7  | 142 | 4 | 0.86 |
| 117SN-3-1-19 | 121   | 180  | 0.67 | 0.0518 | 0.0022 | 0.1595 | 0.0077 | 0.0225 | 0.0006 | 150 | 7  | 143 | 4 | 0.95 |
| 117SN-3-1-20 | 149   | 188  | 0.79 | 0.048  | 0.0023 | 0.1465 | 0.0073 | 0.0223 | 0.0006 | 139 | 6  | 142 | 4 | 1.02 |
| 117SN-3-1-21 | 182   | 279  | 0.65 | 0.0575 | 0.0025 | 0.1737 | 0.008  | 0.0219 | 0.0006 | 163 | 7  | 139 | 4 | 0.85 |
| 117SN-3-1-22 | 204   | 203  | 1    | 0.0623 | 0.0037 | 0.1955 | 0.013  | 0.0224 | 0.0007 | 181 | 11 | 143 | 4 | 0.79 |
| 117SN-3-1-23 | 109.7 | 134  | 0.82 | 0.0513 | 0.0028 | 0.1564 | 0.0086 | 0.0224 | 0.0007 | 148 | 8  | 143 | 4 | 0.97 |
| 117SN-3-1-24 | 144   | 162  | 0.89 | 0.0638 | 0.0036 | 0.2048 | 0.0132 | 0.0228 | 0.0006 | 189 | 11 | 145 | 4 | 0.77 |
| 117SN-3-1-25 | 211   | 265  | 0.8  | 0.0518 | 0.0028 | 0.1628 | 0.0093 | 0.0226 | 0.0006 | 153 | 8  | 144 | 4 | 0.94 |
| 117SN-3-1-26 | 189   | 201  | 0.94 | 0.0529 | 0.0021 | 0.1631 | 0.0068 | 0.0225 | 0.0006 | 153 | 6  | 143 | 4 | 0.93 |
| 117SN-3-1-27 | 240   | 297  | 0.81 | 0.0491 | 0.002  | 0.1544 | 0.0065 | 0.0228 | 0.0006 | 146 | 6  | 146 | 4 | 1.00 |
| 117SN-1-1-1  | 677   | 361  | 1.87 | 0.0496 | 0.0018 | 0.1375 | 0.0059 | 0.0202 | 0.0005 | 131 | 5  | 129 | 3 | 0.98 |
| 117SN-1-1-2  | 439   | 276  | 1.59 | 0.0506 | 0.002  | 0.1367 | 0.0068 | 0.0197 | 0.0005 | 130 | 6  | 126 | 3 | 0.97 |
| 117SN-1-1-3  | 465   | 468  | 0.99 | 0.0486 | 0.0017 | 0.1321 | 0.0072 | 0.0198 | 0.0005 | 126 | 6  | 126 | 3 | 1.00 |
| 117SN-1-1-4  | 240   | 267  | 0.9  | 0.0516 | 0.0033 | 0.1397 | 0.0094 | 0.02   | 0.0005 | 133 | 8  | 128 | 3 | 0.96 |
| 117SN-1-1-5  | 203   | 207  | 0.98 | 0.0601 | 0.0033 | 0.1658 | 0.0093 | 0.0202 | 0.0006 | 156 | 8  | 129 | 4 | 0.83 |
| 117SN-1-1-6  | 513   | 329  | 1.56 | 0.0518 | 0.0022 | 0.1417 | 0.0065 | 0.0199 | 0.0005 | 135 | 6  | 127 | 3 | 0.94 |
| 117SN-1-1-7  | 336   | 277  | 1.21 | 0.0518 | 0.0023 | 0.1394 | 0.0064 | 0.0199 | 0.0005 | 132 | 6  | 127 | 3 | 0.96 |
| 117SN-1-1-8  | 357   | 341  | 1.05 | 0.0451 | 0.0021 | 0.1236 | 0.0059 | 0.02   | 0.0005 | 118 | 5  | 128 | 3 | 1.08 |
| 117SN-1-1-9  | 295   | 229  | 1.29 | 0.0553 | 0.0039 | 0.1505 | 0.0104 | 0.02   | 0.0006 | 142 | 9  | 128 | 4 | 0.90 |
| 117SN-1-1-10 | 227   | 230  | 0.99 | 0.0476 | 0.0025 | 0.127  | 0.0071 | 0.0194 | 0.0005 | 121 | 6  | 124 | 3 | 1.02 |
| 117SN-1-1-11 | 556   | 237  | 2.34 | 0.0437 | 0.0021 | 0.1174 | 0.006  | 0.0196 | 0.0005 | 113 | 5  | 125 | 3 | 1.11 |
| 117SN-1-1-12 | 312   | 222  | 1.41 | 0.051  | 0.0025 | 0.1377 | 0.0068 | 0.0198 | 0.0006 | 131 | 6  | 126 | 3 | 0.96 |
| 117SN-1-1-13 | 430   | 260  | 1.66 | 0.0475 | 0.0022 | 0.1261 | 0.006  | 0.0194 | 0.0005 | 121 | 5  | 124 | 3 | 1.02 |
| 117SN-1-1-14 | 749   | 387  | 1.93 | 0.0574 | 0.0023 | 0.1614 | 0.0072 | 0.0204 | 0.0005 | 152 | 6  | 130 | 3 | 0.86 |
| 117SN-1-1-15 | 598   | 312  | 1.92 | 0.059  | 0.0022 | 0.1631 | 0.007  | 0.02   | 0.0005 | 153 | 6  | 128 | 3 | 0.84 |
| 117SN-1-1-16 | 244   | 123  | 1.99 | 0.0564 | 0.003  | 0.1581 | 0.0086 | 0.0206 | 0.0006 | 149 | 8  | 132 | 4 | 0.89 |
| 117SN-1-1-17 | 403   | 357  | 1.13 | 0.0464 | 0.002  | 0.1227 | 0.0055 | 0.0194 | 0.0005 | 118 | 5  | 124 | 3 | 1.05 |
| 117SN-1-1-18 | 252   | 198  | 1.27 | 0.0486 | 0.0026 | 0.1301 | 0.0067 | 0.0196 | 0.0006 | 124 | 6  | 125 | 4 | 1.01 |
| 117SN-1-1-19 | 347   | 262  | 1.21 | 0.0571 | 0.0032 | 0.1526 | 0.0089 | 0.0194 | 0.0005 | 144 | 8  | 124 | 3 | 0.86 |
| 117SN-1-1-20 | 341   | 316  | 1.08 | 0.0543 | 0.0024 | 0.1503 | 0.0072 | 0.0202 | 0.0005 | 142 | 6  | 129 | 3 | 0.91 |
| 117SN-1-1-21 | 299   | 309  | 0.97 | 0.0499 | 0.0022 | 0.136  | 0.0063 | 0.0197 | 0.0005 | 129 | 6  | 126 | 3 | 0.98 |
| 117SN-1-1-22 | 954   | 462  | 2.06 | 0.0512 | 0.002  | 0.1362 | 0.0061 | 0.0193 | 0.0005 | 130 | 5  | 123 | 3 | 0.95 |
| 117SN-1-1-23 | 412   | 382  | 1.08 | 0.0509 | 0.0019 | 0.1368 | 0.0054 | 0.0195 | 0.0005 | 130 | 5  | 124 | 3 | 0.95 |
| 117SN-1-1-24 | 1058  | 390  | 2.72 | 0.0511 | 0.0021 | 0.134  | 0.0059 | 0.0191 | 0.0005 | 128 | 5  | 122 | 3 | 0.95 |
| 117SN-1-1-25 | 287   | 255  | 1.13 | 0.0571 | 0.0048 | 0.1548 | 0.013  | 0.0198 | 0.0006 | 146 | 11 | 127 | 4 | 0.87 |



N9, Zhenghe (Duan et al., 2013; Li et al., 2015)

|              |     |     |      |        |        |        |        |        |        |     |    |     |   |      |
|--------------|-----|-----|------|--------|--------|--------|--------|--------|--------|-----|----|-----|---|------|
| 117ZH-2-1-1  | 230 | 200 | 1.15 | 0.0524 | 0.0024 | 0.1599 | 0.0075 | 0.0221 | 0.0006 | 151 | 7  | 141 | 4 | 0.93 |
| 117ZH-2-1-2  | 195 | 274 | 0.71 | 0.0519 | 0.002  | 0.1605 | 0.0066 | 0.0224 | 0.0006 | 151 | 6  | 143 | 4 | 0.95 |
| 117ZH-2-1-3  | 357 | 262 | 1.36 | 0.0466 | 0.002  | 0.1439 | 0.0063 | 0.0225 | 0.0006 | 137 | 6  | 143 | 4 | 1.04 |
| 117ZH-2-1-4  | 210 | 220 | 0.95 | 0.0495 | 0.0021 | 0.1469 | 0.0065 | 0.0216 | 0.0006 | 139 | 6  | 138 | 4 | 0.99 |
| 117ZH-2-1-5  | 177 | 196 | 0.9  | 0.0522 | 0.0026 | 0.161  | 0.0081 | 0.0225 | 0.0006 | 152 | 7  | 144 | 4 | 0.95 |
| 117ZH-2-1-6  | 160 | 160 | 1    | 0.0473 | 0.0026 | 0.1421 | 0.0076 | 0.0221 | 0.0007 | 135 | 7  | 141 | 4 | 1.04 |
| 117ZH-2-1-7  | 130 | 157 | 0.83 | 0.0511 | 0.0023 | 0.1508 | 0.0067 | 0.0219 | 0.0006 | 143 | 6  | 140 | 4 | 0.98 |
| 117ZH-2-1-8  | 157 | 147 | 1.06 | 0.0517 | 0.0023 | 0.1565 | 0.0072 | 0.0221 | 0.0006 | 148 | 6  | 141 | 4 | 0.95 |
| 117ZH-2-1-9  | 194 | 187 | 1.03 | 0.0508 | 0.0022 | 0.1568 | 0.0069 | 0.0223 | 0.0006 | 148 | 6  | 142 | 4 | 0.96 |
| 117ZH-2-1-10 | 214 | 241 | 0.89 | 0.0484 | 0.002  | 0.1457 | 0.0064 | 0.0219 | 0.0006 | 138 | 6  | 139 | 4 | 1.01 |
| 117ZH-2-1-11 | 190 | 237 | 0.8  | 0.0486 | 0.0021 | 0.1469 | 0.0066 | 0.0218 | 0.0006 | 139 | 6  | 139 | 4 | 1.00 |
| 117ZH-2-1-12 | 171 | 235 | 0.73 | 0.0514 | 0.002  | 0.1532 | 0.0063 | 0.0216 | 0.0006 | 145 | 6  | 138 | 4 | 0.95 |
| 117ZH-2-1-13 | 320 | 330 | 0.97 | 0.05   | 0.0019 | 0.1495 | 0.0058 | 0.0217 | 0.0006 | 141 | 5  | 139 | 4 | 0.99 |
| 117ZH-2-1-14 | 223 | 216 | 1.03 | 0.0466 | 0.0019 | 0.1429 | 0.0061 | 0.0223 | 0.0006 | 136 | 5  | 142 | 4 | 1.04 |
| 117ZH-2-1-15 | 154 | 201 | 0.76 | 0.0479 | 0.0021 | 0.1432 | 0.0065 | 0.0217 | 0.0006 | 136 | 6  | 138 | 4 | 1.01 |
| 117ZH-2-1-16 | 234 | 205 | 1.14 | 0.0537 | 0.0022 | 0.1623 | 0.0071 | 0.0219 | 0.0006 | 153 | 6  | 140 | 4 | 0.92 |
| 117ZH-2-1-17 | 255 | 199 | 1.28 | 0.0496 | 0.0021 | 0.1544 | 0.0068 | 0.0226 | 0.0006 | 146 | 6  | 144 | 4 | 0.99 |
| 117ZH-2-1-18 | 168 | 216 | 0.78 | 0.0486 | 0.0022 | 0.1435 | 0.0066 | 0.0216 | 0.0006 | 136 | 6  | 138 | 4 | 1.01 |
| 117ZH-2-1-19 | 239 | 258 | 0.93 | 0.0488 | 0.002  | 0.1419 | 0.0058 | 0.0212 | 0.0006 | 135 | 5  | 135 | 4 | 1.00 |
| 117ZH-2-1-20 | 135 | 132 | 1.02 | 0.0474 | 0.0024 | 0.1431 | 0.0068 | 0.0225 | 0.0007 | 136 | 6  | 143 | 4 | 1.05 |
| 117ZH-2-1-21 | 106 | 121 | 0.87 | 0.0548 | 0.0045 | 0.1666 | 0.0143 | 0.0223 | 0.0006 | 156 | 12 | 142 | 4 | 0.91 |
| 117ZH-2-1-22 | 308 | 425 | 0.73 | 0.0502 | 0.0018 | 0.151  | 0.0056 | 0.0219 | 0.0006 | 143 | 5  | 140 | 4 | 0.98 |
| 117ZH-2-1-23 | 110 | 143 | 0.77 | 0.0481 | 0.0023 | 0.1416 | 0.0071 | 0.0215 | 0.0006 | 134 | 6  | 137 | 4 | 1.02 |
| 117ZH-2-1-24 | 227 | 262 | 0.87 | 0.048  | 0.002  | 0.1429 | 0.0061 | 0.0218 | 0.0006 | 136 | 5  | 139 | 4 | 1.02 |
| 117ZH-2-1-25 | 391 | 302 | 1.29 | 0.0496 | 0.0021 | 0.152  | 0.0065 | 0.0224 | 0.0006 | 144 | 6  | 143 | 4 | 0.99 |

|          |      |     |      |       |        |      |        |       |         |     |    |     |     |      |
|----------|------|-----|------|-------|--------|------|--------|-------|---------|-----|----|-----|-----|------|
| ZK701-1  | 39.1 | 243 | 0.16 | 0.045 | 0.0018 | 0.17 | 0.0119 | 0.027 | 0.00029 | 158 | 10 | 172 | 1.8 | 1.09 |
| ZK701-2  | 87.6 | 465 | 0.19 | 0.048 | 0.0013 | 0.18 | 0.0111 | 0.028 | 0.00029 | 172 | 10 | 176 | 1.8 | 1.02 |
| ZK701-3  | 68.7 | 315 | 0.22 | 0.048 | 0.002  | 0.18 | 0.0109 | 0.027 | 0.00033 | 166 | 9  | 172 | 2.1 | 1.04 |
| ZK701-4  | 60.3 | 169 | 0.36 | 0.047 | 0.0027 | 0.17 | 0.0114 | 0.027 | 0.00037 | 161 | 10 | 172 | 2.3 | 1.07 |
| ZK701-5  | 71   | 390 | 0.18 | 0.048 | 0.0017 | 0.18 | 0.0082 | 0.027 | 0.00031 | 166 | 7  | 172 | 2   | 1.04 |
| ZK701-6  | 116  | 405 | 0.29 | 0.049 | 0.0017 | 0.19 | 0.0073 | 0.027 | 0.00026 | 173 | 6  | 174 | 1.6 | 1.01 |
| ZK701-7  | 134  | 802 | 0.17 | 0.047 | 0.0014 | 0.17 | 0.0056 | 0.027 | 0.00023 | 162 | 5  | 170 | 1.4 | 1.05 |
| ZK701-8  | 72.5 | 359 | 0.2  | 0.049 | 0.0018 | 0.19 | 0.007  | 0.027 | 0.00032 | 174 | 6  | 175 | 2   | 1.00 |
| ZK701-9  | 56.3 | 186 | 0.3  | 0.051 | 0.0023 | 0.19 | 0.0084 | 0.027 | 0.00035 | 178 | 7  | 174 | 2.2 | 0.98 |
| ZK701-10 | 131  | 386 | 0.34 | 0.05  | 0.0019 | 0.19 | 0.0069 | 0.027 | 0.00027 | 176 | 6  | 175 | 1.7 | 0.99 |
| ZK701-11 | 113  | 425 | 0.27 | 0.051 | 0.0019 | 0.19 | 0.0073 | 0.027 | 0.0003  | 180 | 6  | 175 | 1.9 | 0.97 |
| ZK701-12 | 71.4 | 274 | 0.26 | 0.054 | 0.0023 | 0.2  | 0.0086 | 0.027 | 0.00031 | 188 | 7  | 174 | 2   | 0.93 |
| ZK701-13 | 77   | 264 | 0.29 | 0.052 | 0.0023 | 0.2  | 0.0085 | 0.027 | 0.0003  | 182 | 7  | 173 | 1.9 | 0.95 |
| ZK701-14 | 110  | 611 | 0.18 | 0.05  | 0.0014 | 0.19 | 0.0055 | 0.028 | 0.00027 | 177 | 5  | 175 | 1.7 | 0.99 |
| ZK701-15 | 39.7 | 179 | 0.22 | 0.046 | 0.0021 | 0.17 | 0.0079 | 0.027 | 0.00035 | 163 | 7  | 175 | 2.2 | 1.07 |
| ZK701-16 | 38.7 | 190 | 0.2  | 0.048 | 0.0024 | 0.18 | 0.0089 | 0.027 | 0.00034 | 171 | 8  | 174 | 2.1 | 1.02 |
| ZK701-17 | 125  | 451 | 0.28 | 0.049 | 0.0016 | 0.18 | 0.0061 | 0.027 | 0.00027 | 171 | 5  | 173 | 1.7 | 1.01 |
| ZK701-18 | 55.6 | 358 | 0.16 | 0.049 | 0.0019 | 0.18 | 0.0067 | 0.027 | 0.0003  | 172 | 6  | 174 | 1.9 | 1.01 |
| ZK701-19 | 52.3 | 281 | 0.19 | 0.051 | 0.0018 | 0.2  | 0.0075 | 0.027 | 0.00034 | 182 | 6  | 174 | 2.1 | 0.96 |
| ZK701-20 | 65.9 | 235 | 0.28 | 0.054 | 0.0019 | 0.21 | 0.0091 | 0.027 | 0.00033 | 190 | 8  | 175 | 2.1 | 0.92 |
| ZK701-21 | 64.9 | 411 | 0.16 | 0.051 | 0.0015 | 0.2  | 0.0081 | 0.028 | 0.00025 | 181 | 7  | 176 | 1.6 | 0.97 |

N10, Fu'an (Li et al., 2009)

|                |     |     |      |        |     |       |     |        |     |       |      |      |     |      |     |
|----------------|-----|-----|------|--------|-----|-------|-----|--------|-----|-------|------|------|-----|------|-----|
| T204-9400-1.1  | 434 | 299 | 1.45 | 0.0405 | 13  | 0.14  | 13  | 0.0251 | 4   | 2318  | 330  | 160  | 6.3 | 149  | 7.8 |
| T204-9400-2.1  | 108 | 130 | 0.83 | 0.028  | 52  | 0.092 | 52  | 0.0239 | 4.6 | 21380 | 1700 | 152  | 7   | 137  | 22  |
| T204-9400-3.1  | 210 | 178 | 1.18 | 0.0432 | 12  | 0.152 | 13  | 0.0255 | 4.1 | 2154  | 310  | 162  | 6.6 | 151  | 9.7 |
| T204-9400-4.1  | 285 | 197 | 1.45 | 0.039  | 27  | 0.138 | 28  | 0.0256 | 4.4 | 2409  | 720  | 163  | 7   | 150  | 13  |
| T204-9400-5.1  | 76  | 76  | 1.00 | 0.074  | 54  | 0.22  | 55  | 0.0216 | 8.2 | 4030  | 1100 | 138  | 11  | 188  | 49  |
| T204-9400-6.1  | 491 | 455 | 1.08 | 0.0513 | 7.5 | 0.177 | 8.5 | 0.0251 | 4   | 253   | 170  | 160  | 6.3 | 158  | 7.9 |
| T204-9400-7.1  | 42  | 58  | 0.72 | 0.2665 | 0.8 | 23.47 | 4.1 | 0.639  | 4   | 3286  | 13   | 3184 | 100 | 3146 | 140 |
| T204-9400-8.1  | 370 | 309 | 1.20 | 0.0479 | 9   | 0.18  | 9.9 | 0.0272 | 4   | 92    | 210  | 173  | 6.8 | 164  | 8.5 |
| T204-9400-9.1  | 351 | 360 | 0.98 | 0.0435 | 9.7 | 0.128 | 10  | 0.0214 | 4   | 2141  | 240  | 137  | 5.4 | 131  | 8.6 |
| T204-9400-10.1 | 380 | 361 | 1.05 | 0.0499 | 7.3 | 0.158 | 8.3 | 0.0229 | 4   | 190   | 170  | 146  | 5.8 | 141  | 7.3 |
| T204-9400-11.1 | 573 | 444 | 1.29 | 0.0523 | 4.2 | 0.195 | 5.7 | 0.0271 | 3.9 | 298   | 96   | 172  | 6.7 | 171  | 7.4 |
| T204-9400-12.1 | 224 | 178 | 1.26 | 0.034  | 31  | 0.113 | 31  | 0.0239 | 4.5 | 2766  | 880  | 152  | 6.8 | 132  | 12  |
| T204-9400-13.1 | 201 | 200 | 1.01 | 0.045  | 5.5 | 0.153 | 6.8 | 0.0246 | 4.1 | 258   | 130  | 157  | 6.3 | 154  | 7.9 |
| T204-9400-14.1 | 209 | 236 | 0.89 | 0.0471 | 9   | 0.161 | 9.8 | 0.0248 | 4   | 52    | 210  | 158  | 6.3 | 164  | 9.1 |
| T204-9400-15.1 | 529 | 342 | 1.55 | 0.0543 | 8.6 | 0.197 | 10  | 0.0263 | 5.5 | 382   | 190  | 168  | 9.1 | 164  | 10  |
| T204-9400-16.1 | 397 | 242 | 1.64 | 0.0593 | 9.2 | 0.218 | 10  | 0.0267 | 4   | 578   | 200  | 170  | 6.8 | 169  | 8.3 |
| T204-9400-17.1 | 372 | 777 | 0.48 | 0.0541 | 4.1 | 0.197 | 5.6 | 0.0264 | 3.9 | 376   | 92   | 168  | 6.5 | 178  | 9.2 |
| T204-9401-1.1  | 328 | 319 | 1.03 | 0.0476 | 8.3 | 0.153 | 9.2 | 0.0234 | 4   | 80    | 200  | 149  | 6   | 146  | 7.9 |
| T204-9401-2.1  | 73  | 79  | 0.92 | 0.048  | 31  | 0.172 | 31  | 0.0262 | 5.1 | 80    | 730  | 167  | 8.4 | 171  | 23  |
| T204-9401-3.1  | 148 | 163 | 0.91 | 0.044  | 27  | 0.136 | 27  | 0.0224 | 4.4 | 2108  | 660  | 143  | 6.2 | 126  | 16  |
| T204-9401-4.1  | 387 | 344 | 1.13 | 0.0582 | 10  | 0.193 | 11  | 0.0241 | 4   | 536   | 230  | 153  | 6.1 | 157  | 9.4 |
| T204-9401-5.1  | 118 | 166 | 0.71 | 0.02   | 79  | 0.061 | 79  | 0.0223 | 4.6 | 22660 | 3500 | 142  | 6.4 | 115  | 24  |
| T204-9401-6.1  | 130 | 575 | 0.23 | 0.1128 | 0.5 | 5.27  | 3.9 | 0.339  | 3.8 | 1846  | 9.6  | 1881 | 63  | 1874 | 75  |
| T204-9401-7.1  | 135 | 145 | 0.93 | 0.043  | 51  | 0.131 | 51  | 0.0222 | 4.8 | 2180  | 1300 | 142  | 6.8 | 131  | 25  |
| T204-9401-8.1  | 328 | 217 | 1.51 | 0.054  | 9.5 | 0.181 | 10  | 0.0244 | 4.1 | 370   | 210  | 155  | 6.2 | 164  | 8.3 |
| T204-9401-9.1  | 184 | 209 | 0.88 | 0.0487 | 14  | 0.151 | 15  | 0.0225 | 4.4 | 132   | 340  | 143  | 6.3 | 134  | 11  |
| T204-9401-10.1 | 203 | 238 | 0.85 | 0.0219 | 9.5 | 140   | 13  |        |     |       |      |      |     |      |     |
| T204-9401-11.1 | 39  | 36  | 1.08 | 0.018  | 8.9 | 115   | 10  | 109    | 52  |       |      |      |     |      |     |



|                |     |     |      |        |     |       |     |        |      |  |      |     |  |     |     |     |    |
|----------------|-----|-----|------|--------|-----|-------|-----|--------|------|--|------|-----|--|-----|-----|-----|----|
| T204-9401-12.1 | 500 | 822 | 0.61 | 0.0425 | 8.9 | 0.153 | 9.7 | 0.0262 | 3.9  |  | 2194 | 220 |  | 167 | 6.4 | 154 | 10 |
| T204-9401-13.1 | 203 | 134 | 1.51 | 0.035  | 30  | 0.117 | 30  | 0.0239 | 4.3  |  | 2670 | 830 |  | 152 | 6.5 | 154 | 11 |
| T204-9401-14.1 | 303 | 259 | 1.17 | 0.0233 | 4.5 | 149   | 6.6 | 24530  | 7900 |  |      |     |  | 119 | 16  |     |    |
| T204-9401-15.1 | 487 | 258 | 1.89 | 0.047  | 11  | 0.164 | 13  | 0.0253 | 6.5  |  | 50   | 260 |  | 161 | 10  | 153 | 11 |
| T204-9401-16.1 | 145 | 162 | 0.90 | 0.037  | 29  | 0.116 | 30  | 0.0227 | 4.3  |  | 2554 | 790 |  | 145 | 6.1 | 127 | 14 |
| T204-9401-17.1 | 213 | 253 | 0.84 | 0.0415 | 15  | 0.133 | 16  | 0.0232 | 4.1  |  | 2258 | 390 |  | 148 | 6.1 | 137 | 11 |

N11, Zherong (Liu et al., 2016)

|         |      |     |      |         |         |         |         |         |         |         |         |      |      |     |    |     |    |     |     |      |
|---------|------|-----|------|---------|---------|---------|---------|---------|---------|---------|---------|------|------|-----|----|-----|----|-----|-----|------|
| NY03-02 | 189  | 117 | 1.61 | 0.0642  | 0.00933 | 0.17203 | 0.02347 | 0.02053 | 0.00059 | 0.00478 | 0.00031 | 746  | 281  | 161 | 20 | 131 | 4  | 96  | 6   | 0.81 |
| NY03-03 | 140  | 162 | 0.86 | 0.07144 | 0.00641 | 0.19151 | 0.01489 | 0.02029 | 0.00053 | 0.00462 | 0.00027 | 970  | 183  | 178 | 13 | 129 | 3  | 93  | 6   | 0.72 |
| NY03-04 | 212  | 151 | 1.41 | 0.05309 | 0.00563 | 0.14436 | 0.01468 | 0.02037 | 0.00050 | 0.00457 | 0.00026 | 332  | 247  | 137 | 13 | 130 | 3  | 92  | 5   | 0.95 |
| NY03-06 | 148  | 179 | 0.83 | 0.05944 | 0.00366 | 0.15900 | 0.00902 | 0.02007 | 0.00029 | 0.00449 | 0.00023 | 583  | 140  | 150 | 8  | 128 | 2  | 90  | 5   | 0.85 |
| NY03-07 | 147  | 116 | 1.27 | 0.09778 | 0.01208 | 0.28245 | 0.04093 | 0.01990 | 0.00055 | 0.00579 | 0.00042 | 1583 | 233  | 253 | 32 | 127 | 3  | 117 | 9   | 0.50 |
| NY03-08 | 263  | 161 | 1.64 | 0.08690 | 0.00604 | 0.25493 | 0.02091 | 0.02066 | 0.00045 | 0.00525 | 0.00025 | 1358 | 134  | 231 | 17 | 132 | 3  | 106 | 5   | 0.57 |
| NY03-09 | 353  | 235 | 1.5  | 0.05372 | 0.00340 | 0.14903 | 0.00944 | 0.02024 | 0.00031 | 0.00478 | 0.00020 | 367  | 143  | 141 | 8  | 129 | 2  | 96  | 4   | 0.91 |
| NY03-10 | 121  | 98  | 1.24 | 0.07662 | 0.00497 | 0.20772 | 0.01372 | 0.02027 | 0.00043 | 0.00477 | 0.00023 | 1122 | 130  | 192 | 12 | 129 | 3  | 96  | 5   | 0.67 |
| NY03-11 | 325  | 325 | 1    | 0.05400 | 0.00261 | 0.14868 | 0.00702 | 0.02022 | 0.00026 | 0.00481 | 0.00018 | 372  | 109  | 141 | 6  | 129 | 2  | 97  | 4   | 0.91 |
| NY03-12 | 121  | 87  | 1.4  | 0.07761 | 0.00559 | 0.19957 | 0.01223 | 0.02020 | 0.00042 | 0.00468 | 0.00020 | 1137 | 143  | 185 | 10 | 129 | 3  | 94  | 4   | 0.70 |
| NY03-13 | 84   | 65  | 1.3  | 0.10806 | 0.01120 | 0.28957 | 0.02547 | 0.02053 | 0.00061 | 0.00574 | 0.00038 | 1769 | 191  | 258 | 20 | 131 | 4  | 116 | 8   | 0.51 |
| NY03-14 | 130  | 90  | 1.45 | 0.06672 | 0.00750 | 0.19551 | 0.02502 | 0.02053 | 0.00069 | 0.00490 | 0.00033 | 828  | 236  | 181 | 21 | 131 | 4  | 99  | 7   | 0.72 |
| NY03-15 | 477  | 192 | 2.48 | 0.04925 | 0.00824 | 0.13793 | 0.02259 | 0.02059 | 0.00080 | 0.00483 | 0.00031 | 167  | 343  | 131 | 20 | 131 | 5  | 97  | 6   | 1.00 |
| NY03-16 | 281  | 250 | 1.13 | 0.04889 | 0.00384 | 0.13704 | 0.01006 | 0.02053 | 0.00042 | 0.00458 | 0.00024 | 143  | 174  | 130 | 9  | 131 | 3  | 92  | 5   | 1.01 |
| NY03-17 | 183  | 164 | 1.12 | 0.05496 | 0.00646 | 0.14919 | 0.01573 | 0.02062 | 0.00055 | 0.00434 | 0.00028 | 409  | 265  | 141 | 14 | 132 | 3  | 88  | 6   | 0.94 |
| NY03-18 | 172  | 106 | 1.62 | 0.06947 | 0.00778 | 0.20021 | 0.02677 | 0.02044 | 0.00101 | 0.00480 | 0.00037 | 922  | 231  | 185 | 23 | 130 | 6  | 97  | 8   | 0.70 |
| NY03-19 | 291  | 185 | 1.58 | 0.05237 | 0.00360 | 0.14652 | 0.01081 | 0.02061 | 0.00056 | 0.00485 | 0.00020 | 302  | 125  | 139 | 10 | 132 | 4  | 98  | 4   | 0.95 |
| NY03-20 | 162  | 119 | 1.36 | 0.06905 | 0.00462 | 0.18877 | 0.01168 | 0.02057 | 0.00044 | 0.00508 | 0.00024 | 902  | 133  | 176 | 10 | 131 | 3  | 102 | 5   | 0.74 |
| NY04-01 | 422  | 231 | 1.83 | 0.05685 | 0.00365 | 0.15886 | 0.00955 | 0.02048 | 0.00032 | 0.00513 | 0.00020 | 487  | 138  | 150 | 8  | 131 | 2  | 103 | 4   | 0.87 |
| NY04-03 | 243  | 117 | 2.08 | 0.05859 | 0.00437 | 0.15697 | 0.00990 | 0.02035 | 0.00052 | 0.00489 | 0.00021 | 554  | 158  | 148 | 9  | 130 | 3  | 99  | 4   | 0.88 |
| NY04-06 | 268  | 207 | 1.29 | 0.05565 | 0.00562 | 0.14201 | 0.01154 | 0.01976 | 0.00055 | 0.00487 | 0.00026 | 439  | 228  | 135 | 10 | 126 | 3  | 98  | 5   | 0.93 |
| NY04-07 | 197  | 118 | 1.67 | 0.05713 | 0.00636 | 0.15452 | 0.01500 | 0.02051 | 0.00070 | 0.00480 | 0.00027 | 498  | 246  | 146 | 13 | 131 | 4  | 97  | 5   | 0.90 |
| NY04-08 | 400  | 176 | 2.27 | 0.04905 | 0.00375 | 0.13376 | 0.00964 | 0.02040 | 0.00047 | 0.00492 | 0.00020 | 150  | 170  | 127 | 9  | 130 | 3  | 99  | 4   | 1.02 |
| NY04-09 | 264  | 278 | 0.95 | 0.05319 | 0.00336 | 0.14514 | 0.00935 | 0.02013 | 0.00041 | 0.00488 | 0.00021 | 345  | 144  | 138 | 8  | 128 | 3  | 98  | 4   | 0.93 |
| NY04-10 | 173  | 104 | 1.66 | 0.06163 | 0.00545 | 0.15897 | 0.01168 | 0.01980 | 0.00054 | 0.00481 | 0.00021 | 661  | 190  | 150 | 10 | 126 | 3  | 97  | 4   | 0.84 |
| NY04-13 | 464  | 323 | 1.43 | 0.05283 | 0.00350 | 0.14405 | 0.00966 | 0.01993 | 0.00031 | 0.00508 | 0.00022 | 320  | 150  | 137 | 9  | 127 | 2  | 102 | 4   | 0.93 |
| NY04-14 | 668  | 414 | 1.61 | 0.05669 | 0.00758 | 0.15466 | 0.01907 | 0.01998 | 0.00023 | 0.00439 | 0.00017 | 480  | 298  | 146 | 17 | 128 | 1  | 88  | 4   | 0.88 |
| NY04-15 | 1485 | 676 | 2.19 | 0.05238 | 0.00283 | 0.14665 | 0.00804 | 0.02041 | 0.00037 | 0.00409 | 0.00019 | 302  | 124  | 139 | 7  | 130 | 2  | 83  | 4   | 0.94 |
| NY04-16 | 300  | 227 | 1.32 | 0.05458 | 0.00315 | 0.14664 | 0.00847 | 0.01979 | 0.00030 | 0.00468 | 0.00022 | 394  | 130  | 139 | 8  | 126 | 2  | 94  | 4   | 0.91 |
| NY04-17 | 195  | 103 | 1.89 | 0.06527 | 0.00447 | 0.18087 | 0.01144 | 0.02034 | 0.00038 | 0.00475 | 0.00021 | 783  | 144  | 169 | 10 | 130 | 2  | 96  | 4   | 0.77 |
| NY04-20 | 560  | 398 | 1.41 | 0.05627 | 0.00257 | 0.15536 | 0.00699 | 0.02019 | 0.00025 | 0.00473 | 0.00017 | 465  | 97   | 147 | 6  | 129 | 2  | 95  | 3   | 0.88 |
| NY05-01 | 168  | 86  | 1.94 | 0.04692 | 0.01631 | 0.12960 | 0.04471 | 0.02004 | 0.00094 | 0.00402 | 0.00070 | 45   | 570  | 124 | 40 | 128 | 6  | 81  | 14  | 1.03 |
| NY05-02 | 231  | 105 | 2.19 | 0.04716 | 0.01030 | 0.13203 | 0.02862 | 0.02032 | 0.00069 | 0.00522 | 0.00068 | 57   | 375  | 126 | 26 | 130 | 4  | 105 | 14  | 1.03 |
| NY05-03 | 109  | 54  | 2.04 | 0.05136 | 0.01887 | 0.14415 | 0.05259 | 0.02035 | 0.00096 | 0.00409 | 0.00085 | 257  | 646  | 137 | 47 | 130 | 6  | 82  | 17  | 0.95 |
| NY05-04 | 112  | 47  | 2.41 | 0.04821 | 0.02604 | 0.13735 | 0.07375 | 0.02067 | 0.00128 | 0.00427 | 0.00086 | 110  | 942  | 131 | 66 | 132 | 8  | 86  | 17  | 1.01 |
| NY05-05 | 181  | 77  | 2.35 | 0.04843 | 0.00951 | 0.13502 | 0.02640 | 0.02022 | 0.00053 | 0.00541 | 0.00067 | 120  | 350  | 129 | 24 | 129 | 3  | 109 | 13  | 1.00 |
| NY05-06 | 140  | 59  | 2.38 | 0.04866 | 0.01765 | 0.13572 | 0.04894 | 0.02024 | 0.00090 | 0.00536 | 0.00095 | 131  | 610  | 129 | 44 | 129 | 6  | 108 | 19  | 1.00 |
| NY05-07 | 116  | 70  | 1.65 | 0.04717 | 0.01924 | 0.13365 | 0.05412 | 0.02054 | 0.00109 | 0.00535 | 0.00150 | 58   | 681  | 127 | 48 | 131 | 7  | 108 | 30  | 1.03 |
| NY05-08 | 187  | 151 | 1.23 | 0.04799 | 0.00657 | 0.13783 | 0.01868 | 0.02083 | 0.00054 | 0.00562 | 0.00110 | 99   | 274  | 131 | 17 | 133 | 3  | 113 | 22  | 1.02 |
| NY05-09 | 95   | 49  | 1.93 | 0.04662 | 0.03021 | 0.13097 | 0.08429 | 0.02036 | 0.00156 | 0.01045 | 0.00060 | 30   | 1006 | 125 | 76 | 130 | 10 | 210 | 132 | 1.04 |
| NY05-10 | 71   | 36  | 2.01 | 0.04887 | 0.03043 | 0.13554 | 0.08392 | 0.02011 | 0.00138 | 0.00404 | 0.00128 | 142  | 1022 | 129 | 75 | 128 | 9  | 81  | 26  | 0.99 |
| NY05-12 | 178  | 69  | 2.59 | 0.04977 | 0.02628 | 0.14220 | 0.07442 | 0.02072 | 0.00153 | 0.00480 | 0.00156 | 184  | 933  | 135 | 66 | 132 | 10 | 97  | 31  | 0.98 |
| NY05-15 | 530  | 367 | 1.45 | 0.05251 | 0.00479 | 0.14771 | 0.01326 | 0.02042 | 0.00052 | 0.00528 | 0.00104 | 308  | 209  | 140 | 12 | 130 | 3  | 106 | 21  | 0.93 |
| NY05-17 | 204  | 102 | 2    | 0.05046 | 0.01060 | 0.14050 | 0.02923 | 0.02019 | 0.00068 | 0.00639 | 0.00165 | 216  | 387  | 133 | 26 | 129 | 4  | 129 | 33  | 0.97 |
| NY05-18 | 348  | 459 | 0.76 | 0.04834 | 0.00442 | 0.13569 | 0.01218 | 0.02036 | 0.00051 | 0.00585 | 0.00153 | 116  | 206  | 129 | 11 | 130 | 3  | 118 | 31  | 1.01 |
| NY05-19 | 96   | 48  | 1.99 | 0.04810 | 0.01746 | 0.13610 | 0.04916 | 0.02052 | 0.00082 | 0.00593 | 0.00107 | 104  | 606  | 130 | 44 | 131 | 5  | 120 | 21  | 1.01 |
| NY05-20 | 291  | 117 | 2.49 | 0.04844 | 0.00857 | 0.13799 | 0.02420 | 0.02066 | 0.00061 | 0.00583 | 0.00108 | 121  | 326  | 131 | 22 | 132 | 4  | 117 | 22  | 1.01 |
| NY08-01 | 250  | 136 | 1.85 | 0.04978 | 0.00693 | 0.13900 | 0.01919 | 0.02025 | 0.00049 | 0.00633 | 0.00108 | 185  | 285  | 132 | 17 | 129 | 3  | 128 | 22  | 0.98 |
| NY08-02 | 452  | 367 | 1.23 | 0.04816 | 0.00258 | 0.13584 | 0.00729 | 0.02046 | 0.00034 | 0.00675 | 0.00087 | 107  | 120  | 129 | 7  | 131 | 2  | 136 | 17  | 1.02 |
| NY08-03 | 312  | 360 | 0.87 | 0.05044 | 0.00307 | 0.13738 | 0.00835 | 0.01976 | 0.00036 | 0.00557 | 0.00070 | 215  | 141  | 131 | 7  | 126 | 2  | 112 | 14  | 0.96 |
| NY08-04 | 120  | 56  | 2.14 | 0.04936 | 0.01472 | 0.13739 | 0.04077 | 0.02019 | 0.00067 | 0.00684 | 0.00109 | 165  | 504  | 131 | 36 | 129 | 4  | 138 | 22  | 0.98 |
| NY08-05 | 485  | 519 | 0.93 | 0.04688 | 0.00187 | 0.13223 | 0.00534 | 0.02046 | 0.00032 | 0.00671 | 0.00093 | 43   | 86   | 126 | 5  | 131 | 2  | 135 | 19  | 1.04 |
| NY08-06 | 204  | 129 | 1.59 | 0.04899 | 0.01453 | 0.13905 | 0.04076 | 0.02059 | 0.00100 | 0.00825 | 0.00273 | 147  | 500  | 132 | 36 | 131 | 6  | 166 | 55  | 0.99 |
| NY08-07 | 306  | 203 | 1.51 | 0.04653 | 0.00805 | 0.13150 | 0.02250 | 0.02050 | 0.00067 | 0.00335 | 0.00068 | 25   | 304  | 125 | 20 | 131 | 4  | 68  | 14  | 1.05 |
| NY08-09 | 167  | 94  | 1.79 |         |         |         |         |         |         |         |         |      |      |     |    |     |    |     |     |      |



|          |      |     |      |         |         |         |         |         |         |         |         |      |     |     |    |     |   |     |    |      |
|----------|------|-----|------|---------|---------|---------|---------|---------|---------|---------|---------|------|-----|-----|----|-----|---|-----|----|------|
| NY09-05  | 597  | 151 | 3.96 | 0.04699 | 0.00969 | 0.12981 | 0.02650 | 0.02004 | 0.00069 | 0.00352 | 0.00060 | 49   | 354 | 124 | 24 | 128 | 4 | 71  | 12 | 1.03 |
| NY09-06  | 410  | 141 | 2.92 | 0.04795 | 0.00625 | 0.13605 | 0.01760 | 0.02058 | 0.00048 | 0.00694 | 0.00130 | 97   | 260 | 130 | 16 | 131 | 3 | 140 | 26 | 1.01 |
| NY09-08  | 139  | 75  | 1.86 | 0.04700 | 0.01516 | 0.13378 | 0.04289 | 0.02065 | 0.00083 | 0.00823 | 0.00206 | 49   | 527 | 127 | 38 | 132 | 5 | 166 | 41 | 1.04 |
| NY09-09  | 329  | 199 | 1.65 | 0.04721 | 0.00416 | 0.13414 | 0.01176 | 0.02061 | 0.00039 | 0.00767 | 0.00147 | 60   | 195 | 128 | 11 | 132 | 2 | 154 | 29 | 1.03 |
| NY09-10  | 420  | 78  | 1.54 | 0.04768 | 0.02162 | 0.13662 | 0.06149 | 0.02079 | 0.00123 | 0.00386 | 0.00111 | 83   | 775 | 130 | 55 | 133 | 8 | 78  | 22 | 1.02 |
| NY09-11  | 252  | 122 | 2.07 | 0.05115 | 0.00675 | 0.14187 | 0.01862 | 0.02012 | 0.00045 | 0.00664 | 0.00081 | 248  | 288 | 135 | 17 | 128 | 3 | 134 | 16 | 0.95 |
| NY09-12  | 168  | 70  | 2.39 | 0.04872 | 0.01490 | 0.13373 | 0.04058 | 0.01991 | 0.00084 | 0.00422 | 0.00077 | 134  | 517 | 127 | 36 | 127 | 5 | 85  | 15 | 1.00 |
| NY09-13  | 370  | 208 | 1.78 | 0.04963 | 0.00427 | 0.13631 | 0.01166 | 0.01992 | 0.00039 | 0.00714 | 0.00105 | 178  | 196 | 130 | 10 | 127 | 2 | 144 | 21 | 0.98 |
| NY09-15  | 381  | 209 | 1.83 | 0.05090 | 0.00447 | 0.14012 | 0.01224 | 0.01997 | 0.00040 | 0.00579 | 0.00077 | 236  | 201 | 133 | 11 | 127 | 3 | 117 | 15 | 0.95 |
| NY09-16  | 333  | 361 | 0.92 | 0.04998 | 0.00332 | 0.14063 | 0.00928 | 0.02041 | 0.00040 | 0.00637 | 0.00103 | 194  | 152 | 134 | 8  | 130 | 3 | 128 | 21 | 0.97 |
| NY09-17  | 120  | 88  | 1.37 | 0.05072 | 0.01479 | 0.14664 | 0.04237 | 0.02097 | 0.00090 | 0.00843 | 0.00269 | 228  | 509 | 139 | 38 | 134 | 6 | 170 | 54 | 0.96 |
| NY09-18  | 285  | 182 | 1.57 | 0.04912 | 0.00449 | 0.14115 | 0.01284 | 0.02085 | 0.00040 | 0.00655 | 0.00116 | 154  | 207 | 134 | 11 | 133 | 3 | 132 | 23 | 0.99 |
| NY09-19  | 384  | 134 | 2.86 | 0.04914 | 0.00574 | 0.13876 | 0.01614 | 0.02048 | 0.00042 | 0.00582 | 0.00089 | 155  | 253 | 132 | 14 | 131 | 3 | 117 | 18 | 0.99 |
| NY09-20  | 557  | 213 | 2.62 | 0.05086 | 0.00380 | 0.14214 | 0.01058 | 0.02027 | 0.00037 | 0.00587 | 0.00091 | 234  | 171 | 135 | 9  | 129 | 2 | 118 | 18 | 0.96 |
| NY10-01  | 215  | 151 | 1.42 | 0.04894 | 0.00812 | 0.13320 | 0.02187 | 0.01974 | 0.00057 | 0.00770 | 0.00193 | 145  | 312 | 127 | 20 | 126 | 4 | 155 | 39 | 0.99 |
| NY10-02  | 57   | 43  | 1.32 | 0.05008 | 0.01826 | 0.13531 | 0.04913 | 0.01960 | 0.00074 | 0.00654 | 0.00105 | 199  | 630 | 129 | 44 | 125 | 5 | 132 | 21 | 0.97 |
| NY10-03  | 501  | 395 | 1.27 | 0.05142 | 0.00233 | 0.14061 | 0.00640 | 0.01983 | 0.00032 | 0.00498 | 0.00051 | 260  | 107 | 134 | 6  | 127 | 2 | 100 | 10 | 0.95 |
| NY10-04  | 321  | 234 | 1.38 | 0.04929 | 0.00741 | 0.13467 | 0.01988 | 0.01982 | 0.00067 | 0.00112 | 0.00013 | 162  | 302 | 128 | 18 | 127 | 4 | 23  | 3  | 0.99 |
| NY10-05  | 364  | 172 | 2.12 | 0.04893 | 0.00488 | 0.13457 | 0.01333 | 0.01995 | 0.00040 | 0.00412 | 0.00044 | 144  | 223 | 128 | 12 | 127 | 3 | 83  | 9  | 0.99 |
| NY10-06  | 575  | 582 | 0.99 | 0.05076 | 0.00171 | 0.17543 | 0.00601 | 0.02507 | 0.00040 | 0.00535 | 0.00059 | 230  | 80  | 164 | 5  | 160 | 3 | 108 | 12 | 0.98 |
| NY10-07  | 820  | 361 | 2.27 | 0.04846 | 0.00257 | 0.13421 | 0.00714 | 0.02009 | 0.00033 | 0.00586 | 0.00081 | 122  | 120 | 128 | 6  | 128 | 2 | 118 | 16 | 1.00 |
| NY10-08  | 196  | 153 | 1.28 | 0.04830 | 0.00537 | 0.13327 | 0.01474 | 0.02002 | 0.00041 | 0.00571 | 0.00082 | 114  | 240 | 127 | 13 | 128 | 3 | 115 | 16 | 1.01 |
| NY10-09  | 69   | 45  | 1.54 | 0.05019 | 0.01706 | 0.14145 | 0.04785 | 0.02044 | 0.00074 | 0.00789 | 0.00148 | 204  | 586 | 134 | 43 | 130 | 5 | 159 | 30 | 0.97 |
| NY10-10  | 728  | 499 | 1.46 | 0.04820 | 0.00180 | 0.14951 | 0.00567 | 0.02250 | 0.00035 | 0.00505 | 0.00065 | 109  | 85  | 141 | 5  | 143 | 2 | 102 | 13 | 1.01 |
| NY10-11  | 120  | 72  | 1.66 | 0.04775 | 0.01077 | 0.13464 | 0.03023 | 0.02045 | 0.00057 | 0.00613 | 0.00079 | 87   | 389 | 128 | 27 | 130 | 4 | 124 | 16 | 1.02 |
| NY10-12  | 404  | 256 | 1.57 | 0.05050 | 0.00329 | 0.14053 | 0.00915 | 0.02018 | 0.00035 | 0.00580 | 0.00063 | 218  | 149 | 134 | 8  | 129 | 2 | 117 | 13 | 0.96 |
| NY10-13  | 73   | 46  | 1.58 | 0.04854 | 0.01730 | 0.13709 | 0.04865 | 0.02049 | 0.00076 | 0.00666 | 0.00103 | 126  | 601 | 130 | 43 | 131 | 5 | 134 | 21 | 1.01 |
| NY10-14  | 131  | 102 | 1.28 | 0.05252 | 0.00809 | 0.14760 | 0.02260 | 0.02039 | 0.00050 | 0.00558 | 0.00069 | 308  | 324 | 140 | 20 | 130 | 3 | 112 | 14 | 0.93 |
| NY10-15  | 211  | 148 | 1.43 | 0.05053 | 0.00717 | 0.15412 | 0.02166 | 0.02212 | 0.00060 | 0.00576 | 0.00090 | 219  | 294 | 146 | 19 | 141 | 4 | 116 | 18 | 0.97 |
| NY10-16  | 502  | 260 | 1.93 | 0.05453 | 0.00315 | 0.16610 | 0.00958 | 0.02209 | 0.00038 | 0.00779 | 0.00118 | 393  | 133 | 156 | 8  | 141 | 2 | 157 | 24 | 0.90 |
| NY10-17  | 314  | 124 | 2.54 | 0.05131 | 0.00777 | 0.15501 | 0.02325 | 0.02191 | 0.00059 | 0.00577 | 0.00102 | 255  | 312 | 146 | 20 | 140 | 4 | 116 | 20 | 0.96 |
| NY10-18  | 68   | 36  | 1.88 | 0.05106 | 0.02679 | 0.13931 | 0.07273 | 0.01979 | 0.00110 | 0.00890 | 0.00249 | 244  | 939 | 132 | 65 | 126 | 7 | 179 | 50 | 0.95 |
| NY10-19  | 189  | 134 | 1.41 | 0.04581 | 0.00722 | 0.12778 | 0.02001 | 0.02023 | 0.00050 | 0.00609 | 0.00120 | -12  | 278 | 122 | 18 | 129 | 3 | 123 | 24 | 1.06 |
| NY10-20  | 411  | 364 | 1.13 | 0.04877 | 0.00330 | 0.14816 | 0.00995 | 0.02203 | 0.00044 | 0.00502 | 0.00096 | 137  | 153 | 140 | 9  | 140 | 3 | 101 | 19 | 1.00 |
| SMS01-01 | 367  | 282 | 1.3  | 0.04333 | 0.00301 | 0.11961 | 0.00832 | 0.02002 | 0.00034 | 0.00602 | 0.00070 | -106 | 147 | 115 | 8  | 128 | 2 | 121 | 14 | 1.11 |
| SMS01-02 | 343  | 292 | 1.18 | 0.04921 | 0.00327 | 0.13556 | 0.00898 | 0.01998 | 0.00036 | 0.00705 | 0.00101 | 158  | 151 | 129 | 8  | 128 | 2 | 142 | 20 | 0.99 |
| SMS01-03 | 315  | 248 | 1.27 | 0.05014 | 0.00342 | 0.13660 | 0.00932 | 0.01976 | 0.00034 | 0.00675 | 0.00092 | 201  | 156 | 130 | 8  | 126 | 2 | 136 | 18 | 0.97 |
| SMS01-04 | 614  | 407 | 1.51 | 0.04641 | 0.00327 | 0.12884 | 0.00903 | 0.02013 | 0.00041 | 0.00416 | 0.00057 | 19   | 156 | 123 | 8  | 128 | 3 | 84  | 11 | 1.04 |
| SMS01-05 | 683  | 462 | 1.48 | 0.04835 | 0.00268 | 0.13575 | 0.00753 | 0.02036 | 0.00038 | 0.00388 | 0.00047 | 116  | 125 | 129 | 7  | 130 | 2 | 78  | 9  | 1.01 |
| SMS01-06 | 335  | 247 | 1.36 | 0.04773 | 0.00465 | 0.13395 | 0.01287 | 0.02036 | 0.00044 | 0.00606 | 0.00135 | 86   | 217 | 128 | 12 | 130 | 3 | 122 | 27 | 1.02 |
| SMS01-07 | 2429 | 648 | 3.75 | 0.04663 | 0.00222 | 0.13180 | 0.00632 | 0.02050 | 0.00038 | 0.00403 | 0.00058 | 30   | 103 | 126 | 6  | 131 | 2 | 81  | 12 | 1.04 |
| SMS01-08 | 383  | 298 | 1.28 | 0.04959 | 0.00319 | 0.13486 | 0.00861 | 0.01972 | 0.00042 | 0.00703 | 0.00148 | 176  | 147 | 128 | 8  | 126 | 3 | 142 | 30 | 0.98 |
| SMS01-09 | 330  | 247 | 1.34 | 0.04880 | 0.00280 | 0.13551 | 0.00773 | 0.02014 | 0.00037 | 0.00705 | 0.00138 | 138  | 130 | 129 | 7  | 129 | 2 | 142 | 28 | 1.00 |
| SMS01-10 | 511  | 347 | 1.47 | 0.05062 | 0.00226 | 0.13701 | 0.00614 | 0.01963 | 0.00034 | 0.00693 | 0.00135 | 224  | 105 | 130 | 5  | 125 | 2 | 140 | 27 | 0.96 |
| SMS01-11 | 410  | 164 | 2.5  | 0.05074 | 0.00612 | 0.15365 | 0.01840 | 0.02196 | 0.00053 | 0.00623 | 0.00092 | 229  | 269 | 145 | 16 | 140 | 3 | 126 | 18 | 0.97 |
| SMS01-12 | 253  | 215 | 1.18 | 0.04768 | 0.00410 | 0.13377 | 0.01142 | 0.02035 | 0.00039 | 0.00648 | 0.00102 | 83   | 193 | 127 | 10 | 130 | 2 | 131 | 20 | 1.02 |
| SMS01-13 | 323  | 237 | 1.36 | 0.05020 | 0.00375 | 0.13809 | 0.01026 | 0.01995 | 0.00037 | 0.00722 | 0.00112 | 204  | 171 | 131 | 9  | 127 | 2 | 145 | 22 | 0.97 |
| SMS01-14 | 544  | 344 | 1.58 | 0.04678 | 0.00259 | 0.12993 | 0.00721 | 0.02015 | 0.00034 | 0.00719 | 0.00108 | 38   | 121 | 124 | 6  | 129 | 2 | 145 | 22 | 1.04 |
| SMS01-15 | 356  | 272 | 1.31 | 0.04637 | 0.00344 | 0.12816 | 0.00946 | 0.02005 | 0.00036 | 0.00772 | 0.00145 | 17   | 165 | 122 | 9  | 128 | 2 | 155 | 29 | 1.05 |
| SMS01-17 | 555  | 367 | 1.51 | 0.04806 | 0.00307 | 0.13293 | 0.00842 | 0.02006 | 0.00036 | 0.00771 | 0.00196 | 102  | 143 | 127 | 8  | 128 | 2 | 155 | 39 | 1.01 |
| SMS01-19 | 616  | 303 | 2.04 | 0.04577 | 0.00284 | 0.12644 | 0.00785 | 0.02004 | 0.00034 | 0.00742 | 0.00155 | -14  | 136 | 121 | 7  | 128 | 2 | 149 | 31 | 1.06 |
| SMS01-20 | 645  | 374 | 1.73 | 0.04624 | 0.00251 | 0.12778 | 0.00695 | 0.02004 | 0.00033 | 0.00832 | 0.00199 | 10   | 118 | 122 | 6  | 128 | 2 | 167 | 40 | 1.05 |
| SMS03-01 | 762  | 235 | 3.24 | 0.04889 | 0.00412 | 0.13459 | 0.01123 | 0.01997 | 0.00039 | 0.00853 | 0.00181 | 143  | 190 | 128 | 10 | 127 | 2 | 172 | 36 | 0.99 |
| SMS03-02 | 176  | 99  | 1.78 | 0.04987 | 0.00840 | 0.13545 | 0.02267 | 0.01970 | 0.00048 | 0.00863 | 0.00162 | 189  | 320 | 129 | 20 | 126 | 3 | 174 | 32 | 0.98 |
| SMS03-03 | 135  | 100 | 1.35 | 0.04698 | 0.01229 | 0.12922 | 0.03355 | 0.01995 | 0.00073 | 0.00727 | 0.00183 | 48   | 431 | 123 | 30 | 127 | 5 | 146 | 37 | 1.03 |
| SMS03-05 | 87   | 74  | 1.18 | 0.04852 | 0.01782 | 0.13523 | 0.04936 | 0.02022 | 0.00092 | 0.00576 | 0.00157 | 125  | 617 | 129 | 44 | 129 | 6 | 116 | 32 | 1.00 |
| SMS03-06 | 189  | 116 | 1.62 | 0.05121 | 0.00999 | 0.13973 | 0.02705 | 0.01979 | 0.00061 | 0.00624 | 0.00127 | 250  | 367 | 133 | 24 | 126 | 4 | 126 | 26 | 0.95 |
| SMS03-07 | 576  | 392 | 1.47 | 0.04609 | 0.00243 | 0.12791 | 0.00675 | 0.02013 | 0.00033 | 0.00742 | 0.00142 | 2    | 114 | 122 | 6  | 128 | 2 | 149 | 28 | 1.05 |
| SMS03-09 | 86   | 99  | 0.87 | 0.05174 | 0.00790 | 0.14443 | 0.02192 | 0.02025 | 0.00047 | 0.00626 | 0.00138 | 274  | 315 | 137 | 19 | 129 | 3 | 126 | 28 | 0.94 |
| SMS03-10 | 57   | 46  | 1.23 | 0.05014 | 0.02374 | 0.13562 | 0.06384 | 0.01961 | 0.00106 | 0.00676 | 0.00286 | 201  | 842 | 129 | 57 | 125 | 7 | 136 | 57 | 0.97 |
| SMS03-11 | 137  | 91  | 1.51 | 0.04789 | 0.01351 | 0.13161 |         |         |         |         |         |      |     |     |    |     |   |     |    |      |



|         |      |     |      |         |         |         |         |         |         |         |         |      |     |      |    |      |    |      |     |      |
|---------|------|-----|------|---------|---------|---------|---------|---------|---------|---------|---------|------|-----|------|----|------|----|------|-----|------|
| FK01-06 | 279  | 255 | 1.09 | 0.05066 | 0.01172 | 0.16799 | 0.03836 | 0.02408 | 0.00104 | 0.00413 | 0.00129 | 225  | 420 | 158  | 33 | 153  | 7  | 83   | 26  | 0.97 |
| FK01-07 | 89   | 64  | 1.38 | 0.05086 | 0.01223 | 0.25716 | 0.06160 | 0.03667 | 0.00106 | 0.00528 | 0.00111 | 234  | 436 | 232  | 50 | 232  | 7  | 106  | 22  | 1.00 |
| FK01-08 | 151  | 173 | 0.88 | 0.04934 | 0.01165 | 0.16251 | 0.03806 | 0.02388 | 0.00084 | 0.00525 | 0.00196 | 164  | 415 | 153  | 33 | 152  | 5  | 106  | 39  | 0.99 |
| FK01-09 | 151  | 126 | 1.19 | 0.04891 | 0.01378 | 0.16273 | 0.04553 | 0.02413 | 0.00091 | 0.00519 | 0.00193 | 144  | 478 | 153  | 40 | 154  | 6  | 105  | 39  | 1.01 |
| FK01-10 | 133  | 120 | 1.11 | 0.05127 | 0.02826 | 0.16954 | 0.09257 | 0.02399 | 0.00186 | 0.00526 | 0.00442 | 253  | 980 | 159  | 80 | 153  | 12 | 106  | 89  | 0.96 |
| FK01-11 | 96   | 112 | 0.85 | 0.04885 | 0.01339 | 0.16469 | 0.04487 | 0.02449 | 0.00086 | 0.00749 | 0.00223 | 141  | 465 | 155  | 39 | 156  | 5  | 151  | 45  | 1.01 |
| FK01-12 | 284  | 193 | 1.47 | 0.04908 | 0.00868 | 0.15926 | 0.02800 | 0.02355 | 0.00067 | 0.00328 | 0.00057 | 152  | 327 | 150  | 25 | 150  | 4  | 66   | 11  | 1.00 |
| FK01-13 | 164  | 121 | 1.36 | 0.04937 | 0.01825 | 0.16269 | 0.05968 | 0.02390 | 0.00121 | 0.00542 | 0.00248 | 165  | 631 | 153  | 52 | 152  | 8  | 109  | 50  | 0.99 |
| FK01-14 | 147  | 130 | 1.13 | 0.11506 | 0.00237 | 5.35021 | 0.12337 | 0.33720 | 0.00542 | 0.06513 | 0.01235 | 1881 | 38  | 1877 | 20 | 1873 | 26 | 1275 | 234 | 1.00 |
| FK01-15 | 317  | 167 | 1.9  | 0.04866 | 0.02122 | 0.15969 | 0.06901 | 0.02383 | 0.00149 | 0.00290 | 0.00098 | 131  | 749 | 150  | 60 | 152  | 9  | 59   | 20  | 1.01 |
| FK01-16 | 129  | 106 | 1.22 | 0.04767 | 0.01946 | 0.15794 | 0.06406 | 0.02407 | 0.00119 | 0.00735 | 0.00468 | 83   | 686 | 149  | 56 | 153  | 7  | 148  | 94  | 1.03 |
| FK01-17 | 182  | 171 | 1.06 | 0.04889 | 0.00931 | 0.16433 | 0.03107 | 0.02437 | 0.00073 | 0.01018 | 0.00579 | 143  | 351 | 154  | 27 | 155  | 5  | 205  | 116 | 1.01 |
| FK01-18 | 172  | 188 | 0.92 | 0.04914 | 0.00629 | 0.16199 | 0.02068 | 0.02391 | 0.00052 | 0.00935 | 0.00385 | 155  | 266 | 152  | 18 | 152  | 3  | 188  | 77  | 1.00 |
| FK01-19 | 254  | 271 | 0.94 | 0.04904 | 0.00460 | 0.16157 | 0.01515 | 0.02390 | 0.00048 | 0.00775 | 0.00310 | 150  | 213 | 152  | 13 | 152  | 3  | 156  | 62  | 1.00 |
| FK01-20 | 253  | 227 | 1.11 | 0.04849 | 0.00525 | 0.16077 | 0.01736 | 0.02405 | 0.00050 | 0.00532 | 0.00136 | 123  | 239 | 151  | 15 | 153  | 3  | 107  | 27  | 1.01 |
| FK02-01 | 553  | 322 | 1.72 | 0.04894 | 0.00445 | 0.16551 | 0.01498 | 0.02453 | 0.00053 | 0.00242 | 0.00023 | 145  | 206 | 156  | 13 | 156  | 3  | 49   | 5   | 1.00 |
| FK02-02 | 732  | 646 | 1.13 | 0.04944 | 0.00212 | 0.16721 | 0.00732 | 0.02454 | 0.00042 | 0.00739 | 0.00158 | 169  | 100 | 157  | 6  | 156  | 3  | 149  | 32  | 0.99 |
| FK02-03 | 406  | 325 | 1.25 | 0.04972 | 0.00331 | 0.17074 | 0.01143 | 0.02491 | 0.00045 | 0.00572 | 0.00095 | 182  | 152 | 160  | 10 | 159  | 3  | 115  | 19  | 0.99 |
| FK02-04 | 329  | 184 | 1.79 | 0.04921 | 0.00657 | 0.16938 | 0.02252 | 0.02497 | 0.00056 | 0.01440 | 0.00723 | 158  | 272 | 159  | 20 | 159  | 4  | 289  | 144 | 1.00 |
| FK02-05 | 1017 | 533 | 1.91 | 0.04931 | 0.00403 | 0.16696 | 0.01347 | 0.02456 | 0.00055 | 0.02055 | 0.02287 | 163  | 185 | 157  | 12 | 156  | 3  | 411  | 453 | 0.99 |
| FK02-06 | 618  | 900 | 0.69 | 0.04926 | 0.00195 | 0.16668 | 0.00673 | 0.02455 | 0.00043 | 0.00416 | 0.00069 | 160  | 93  | 157  | 6  | 156  | 3  | 84   | 14  | 0.99 |
| FK02-07 | 595  | 547 | 1.09 | 0.04900 | 0.00236 | 0.16787 | 0.00818 | 0.02485 | 0.00044 | 0.00592 | 0.00134 | 148  | 110 | 158  | 7  | 158  | 3  | 119  | 27  | 1.00 |
| FK02-08 | 324  | 313 | 1.03 | 0.04916 | 0.00377 | 0.16628 | 0.01276 | 0.02454 | 0.00046 | 0.00743 | 0.00232 | 155  | 174 | 156  | 11 | 156  | 3  | 150  | 47  | 1.00 |
| FK02-09 | 733  | 394 | 1.86 | 0.04912 | 0.00438 | 0.16745 | 0.01484 | 0.02473 | 0.00056 | 0.00366 | 0.00076 | 154  | 202 | 157  | 13 | 157  | 4  | 74   | 15  | 1.00 |
| FK02-10 | 370  | 345 | 1.07 | 0.04866 | 0.00337 | 0.16459 | 0.01141 | 0.02454 | 0.00045 | 0.00751 | 0.00250 | 131  | 156 | 155  | 10 | 156  | 3  | 151  | 50  | 1.01 |
| FK02-11 | 694  | 338 | 2.06 | 0.04914 | 0.00683 | 0.16623 | 0.02281 | 0.02454 | 0.00071 | 0.00616 | 0.00288 | 155  | 281 | 156  | 20 | 156  | 4  | 124  | 58  | 1.00 |
| FK02-12 | 521  | 418 | 1.25 | 0.04921 | 0.00323 | 0.16742 | 0.01098 | 0.02468 | 0.00045 | 0.01014 | 0.00413 | 158  | 149 | 157  | 10 | 157  | 3  | 204  | 83  | 1.00 |
| FK02-13 | 544  | 431 | 1.26 | 0.04866 | 0.00397 | 0.16524 | 0.01340 | 0.02463 | 0.00050 | 0.00989 | 0.00507 | 131  | 184 | 155  | 12 | 157  | 3  | 199  | 101 | 1.01 |
| FK02-14 | 365  | 224 | 1.62 | 0.04904 | 0.00581 | 0.16706 | 0.01970 | 0.02471 | 0.00054 | 0.01246 | 0.00680 | 150  | 251 | 157  | 17 | 157  | 3  | 250  | 136 | 1.00 |
| FK02-15 | 895  | 380 | 2.35 | 0.04884 | 0.00680 | 0.16407 | 0.02253 | 0.02438 | 0.00072 | 0.00407 | 0.00145 | 140  | 279 | 154  | 20 | 155  | 5  | 82   | 29  | 1.01 |
| FK02-16 | 397  | 304 | 1.31 | 0.04885 | 0.00488 | 0.16617 | 0.01649 | 0.02468 | 0.00052 | 0.01322 | 0.00941 | 141  | 223 | 156  | 14 | 157  | 3  | 265  | 188 | 1.01 |
| FK02-17 | 435  | 289 | 1.51 | 0.04922 | 0.00440 | 0.16513 | 0.01471 | 0.02434 | 0.00047 | 0.00951 | 0.00446 | 158  | 203 | 155  | 13 | 155  | 3  | 191  | 89  | 1.00 |
| FK02-18 | 393  | 270 | 1.45 | 0.04924 | 0.01235 | 0.16723 | 0.04135 | 0.02464 | 0.00115 | 0.01464 | 0.03373 | 159  | 439 | 157  | 36 | 157  | 7  | 294  | 672 | 1.00 |
| FK02-19 | 588  | 377 | 1.56 | 0.04914 | 0.00392 | 0.16497 | 0.01309 | 0.02436 | 0.00048 | 0.00714 | 0.00321 | 155  | 181 | 155  | 11 | 155  | 3  | 144  | 64  | 1.00 |
| FK02-20 | 336  | 218 | 1.54 | 0.04878 | 0.00913 | 0.16619 | 0.03078 | 0.02471 | 0.00081 | 0.00186 | 0.00051 | 137  | 345 | 156  | 27 | 157  | 5  | 38   | 10  | 1.01 |
| FK03-01 | 120  | 150 | 0.8  | 0.04932 | 0.01038 | 0.16858 | 0.03529 | 0.02480 | 0.00071 | 0.00707 | 0.00358 | 163  | 378 | 158  | 31 | 158  | 4  | 142  | 72  | 1.00 |
| FK03-02 | 223  | 312 | 0.72 | 0.04844 | 0.00869 | 0.16411 | 0.02910 | 0.02457 | 0.00082 | 0.00879 | 0.00727 | 121  | 329 | 154  | 25 | 156  | 5  | 177  | 146 | 1.01 |
| FK03-03 | 226  | 243 | 0.93 | 0.04922 | 0.00672 | 0.16836 | 0.02282 | 0.02478 | 0.00064 | 0.00257 | 0.00050 | 158  | 279 | 158  | 20 | 158  | 4  | 52   | 10  | 1.00 |
| FK03-04 | 311  | 352 | 0.89 | 0.04926 | 0.00532 | 0.16840 | 0.01800 | 0.02478 | 0.00061 | 0.00221 | 0.00052 | 160  | 242 | 158  | 16 | 158  | 4  | 45   | 10  | 1.00 |
| FK03-05 | 135  | 166 | 0.81 | 0.04898 | 0.01394 | 0.16717 | 0.04718 | 0.02475 | 0.00104 | 0.00739 | 0.00480 | 147  | 484 | 157  | 41 | 158  | 7  | 149  | 96  | 1.01 |
| FK03-06 | 179  | 196 | 0.91 | 0.04878 | 0.01501 | 0.16925 | 0.05135 | 0.02498 | 0.00138 | 0.00160 | 0.00073 | 137  | 520 | 159  | 45 | 159  | 9  | 32   | 15  | 1.00 |
| FK03-07 | 206  | 267 | 0.77 | 0.04792 | 0.01379 | 0.16574 | 0.04719 | 0.02504 | 0.00118 | 0.01009 | 0.02172 | 95   | 481 | 156  | 41 | 159  | 7  | 203  | 435 | 1.02 |
| FK03-08 | 270  | 273 | 0.99 | 0.04927 | 0.00817 | 0.16941 | 0.02759 | 0.02476 | 0.00092 | 0.00197 | 0.00073 | 161  | 314 | 159  | 24 | 158  | 6  | 40   | 15  | 0.99 |
| FK03-09 | 184  | 228 | 0.81 | 0.04874 | 0.00770 | 0.16657 | 0.02616 | 0.02478 | 0.00067 | 0.00650 | 0.00371 | 135  | 298 | 156  | 23 | 158  | 4  | 131  | 75  | 1.01 |
| FK03-11 | 204  | 243 | 0.84 | 0.04826 | 0.00594 | 0.16627 | 0.02039 | 0.02499 | 0.00053 | 0.00823 | 0.00406 | 112  | 255 | 156  | 18 | 159  | 3  | 166  | 81  | 1.02 |
| FK03-12 | 156  | 186 | 0.84 | 0.04982 | 0.01048 | 0.17231 | 0.03600 | 0.02509 | 0.00078 | 0.01514 | 0.01795 | 187  | 380 | 161  | 31 | 160  | 5  | 304  | 357 | 0.99 |
| FK03-13 | 186  | 282 | 0.66 | 0.04921 | 0.00891 | 0.16856 | 0.03018 | 0.02485 | 0.00080 | 0.01524 | 0.01952 | 158  | 335 | 158  | 26 | 158  | 5  | 306  | 389 | 1.00 |
| FK03-14 | 159  | 190 | 0.83 | 0.04976 | 0.00855 | 0.17339 | 0.02960 | 0.02527 | 0.00068 | 0.00728 | 0.00510 | 184  | 327 | 162  | 26 | 161  | 4  | 147  | 102 | 0.99 |
| FK03-15 | 440  | 434 | 1.01 | 0.04922 | 0.00407 | 0.17101 | 0.01405 | 0.02519 | 0.00052 | 0.01080 | 0.00959 | 158  | 187 | 160  | 12 | 160  | 3  | 217  | 192 | 1.00 |
| FK03-16 | 268  | 282 | 0.95 | 0.04929 | 0.00489 | 0.17294 | 0.01710 | 0.02544 | 0.00051 | 0.00849 | 0.00527 | 162  | 222 | 162  | 15 | 162  | 3  | 171  | 106 | 1.00 |
| FK03-17 | 235  | 193 | 1.22 | 0.04868 | 0.00826 | 0.16731 | 0.02822 | 0.02493 | 0.00065 | 0.00552 | 0.00266 | 132  | 315 | 157  | 25 | 159  | 4  | 111  | 53  | 1.01 |
| FK03-18 | 132  | 158 | 0.83 | 0.05024 | 0.01049 | 0.17440 | 0.03615 | 0.02519 | 0.00079 | 0.00337 | 0.00180 | 206  | 384 | 163  | 31 | 160  | 5  | 68   | 36  | 0.98 |
| FK03-19 | 244  | 297 | 0.82 | 0.04905 | 0.00648 | 0.17102 | 0.02241 | 0.02529 | 0.00066 | 0.00648 | 0.00506 | 150  | 269 | 160  | 19 | 161  | 4  | 131  | 102 | 1.01 |
| FK03-20 | 199  | 231 | 0.86 | 0.04931 | 0.00793 | 0.17288 | 0.02756 | 0.02543 | 0.00070 | 0.00712 | 0.00621 | 163  | 312 | 162  | 24 | 162  | 4  | 143  | 125 | 1.00 |
| NY11-01 | 147  | 163 | 0.9  | 0.04973 | 0.00585 | 0.15015 | 0.01751 | 0.02190 | 0.00054 | 0.00517 | 0.00064 | 182  | 262 | 142  | 15 | 140  | 3  | 104  | 13  | 0.99 |
| NY11-02 | 251  | 270 | 0.93 | 0.05024 | 0.00392 | 0.15121 | 0.01162 | 0.02182 | 0.00045 | 0.00635 | 0.00101 | 206  | 178 | 143  | 10 | 139  | 3  | 128  | 20  | 0.97 |
| NY11-03 | 619  | 451 | 1.38 | 0.04879 | 0.00189 | 0.14547 | 0.00567 | 0.02161 | 0.00033 | 0.00606 | 0.00065 | 138  | 90  | 138  | 5  | 138  | 2  | 122  | 13  | 1.00 |
| NY11-04 | 381  | 420 | 0.91 | 0.04851 | 0.00201 | 0.14553 | 0.00607 | 0.02176 | 0.00034 | 0.00598 | 0.00064 | 124  | 95  | 138  | 5  | 139  | 2  | 121  | 13  | 1.01 |
| NY11-05 | 161  | 203 | 0.79 | 0.04704 | 0.00652 | 0.13959 | 0.01905 | 0.02149 | 0.00061 | 0.00573 | 0.00148 | 51   | 262 | 133  | 17 | 137  | 4  | 115  | 30  | 1.03 |
| NY11-06 | 393  | 287 | 1.37 | 0.04750 | 0.00261 | 0.14194 | 0.00780 | 0.02167 | 0.00036 | 0.00623 | 0.00072 | 74   | 122 | 135  | 7  | 138  | 2  | 126  | 14  | 1.02 |
| NY1     |      |     |      |         |         |         |         |         |         |         |         |      |     |      |    |      |    |      |     |      |



|         |     |     |      |         |         |         |         |         |         |         |         |     |     |     |    |     |   |     |    |      |
|---------|-----|-----|------|---------|---------|---------|---------|---------|---------|---------|---------|-----|-----|-----|----|-----|---|-----|----|------|
| NY12-03 | 166 | 155 | 1.07 | 0.04829 | 0.00906 | 0.15761 | 0.02923 | 0.02369 | 0.00079 | 0.00779 | 0.00188 | 114 | 339 | 149 | 26 | 151 | 5 | 157 | 38 | 1.01 |
| NY12-04 | 108 | 93  | 1.16 | 0.04886 | 0.01063 | 0.15474 | 0.03342 | 0.02297 | 0.00072 | 0.00827 | 0.00207 | 141 | 387 | 146 | 29 | 146 | 5 | 166 | 41 | 1.00 |
| NY12-05 | 189 | 141 | 1.35 | 0.04998 | 0.00547 | 0.15675 | 0.01708 | 0.02275 | 0.00045 | 0.00666 | 0.00098 | 194 | 246 | 148 | 15 | 145 | 3 | 134 | 20 | 0.98 |
| NY12-06 | 102 | 89  | 1.14 | 0.04989 | 0.00979 | 0.15751 | 0.03073 | 0.02290 | 0.00065 | 0.00450 | 0.00080 | 190 | 363 | 149 | 27 | 146 | 4 | 91  | 16 | 0.98 |
| NY12-07 | 369 | 424 | 0.87 | 0.04789 | 0.00207 | 0.15539 | 0.00677 | 0.02354 | 0.00037 | 0.00629 | 0.00092 | 94  | 97  | 147 | 6  | 150 | 2 | 127 | 18 | 1.02 |
| NY12-08 | 176 | 143 | 1.23 | 0.04791 | 0.00724 | 0.15365 | 0.02302 | 0.02327 | 0.00063 | 0.00518 | 0.00095 | 95  | 284 | 145 | 20 | 148 | 4 | 104 | 19 | 1.02 |
| NY12-09 | 132 | 120 | 1.1  | 0.04784 | 0.00801 | 0.15284 | 0.02541 | 0.02318 | 0.00063 | 0.00656 | 0.00132 | 91  | 307 | 144 | 22 | 148 | 4 | 132 | 27 | 1.03 |
| NY12-10 | 201 | 249 | 0.81 | 0.04732 | 0.00421 | 0.15178 | 0.01334 | 0.02327 | 0.00050 | 0.00515 | 0.00106 | 65  | 197 | 143 | 12 | 148 | 3 | 104 | 21 | 1.03 |
| NY12-11 | 148 | 137 | 1.08 | 0.05219 | 0.00567 | 0.16698 | 0.01805 | 0.02321 | 0.00047 | 0.00621 | 0.00077 | 294 | 249 | 157 | 16 | 148 | 3 | 125 | 15 | 0.94 |
| NY12-12 | 100 | 80  | 1.26 | 0.04700 | 0.01060 | 0.15124 | 0.03394 | 0.02335 | 0.00068 | 0.00604 | 0.00090 | 49  | 379 | 143 | 30 | 149 | 4 | 122 | 18 | 1.04 |
| NY12-13 | 248 | 196 | 1.27 | 0.05102 | 0.00688 | 0.16228 | 0.02163 | 0.02309 | 0.00064 | 0.00636 | 0.00124 | 242 | 288 | 153 | 19 | 147 | 4 | 128 | 25 | 0.96 |
| NY12-14 | 340 | 403 | 0.84 | 0.04846 | 0.00326 | 0.15417 | 0.01033 | 0.02308 | 0.00046 | 0.00552 | 0.00090 | 122 | 151 | 146 | 9  | 147 | 3 | 111 | 18 | 1.01 |
| NY12-15 | 391 | 439 | 0.89 | 0.04884 | 0.00236 | 0.15753 | 0.00764 | 0.02340 | 0.00039 | 0.00660 | 0.00097 | 140 | 110 | 149 | 7  | 149 | 2 | 133 | 19 | 1.00 |
| NY12-16 | 180 | 116 | 1.55 | 0.04966 | 0.00832 | 0.15851 | 0.02635 | 0.02316 | 0.00063 | 0.00543 | 0.00094 | 179 | 318 | 149 | 23 | 148 | 4 | 109 | 19 | 0.99 |
| NY12-17 | 86  | 78  | 1.1  | 0.04658 | 0.01219 | 0.15360 | 0.04000 | 0.02392 | 0.00078 | 0.00745 | 0.00155 | 28  | 430 | 145 | 35 | 152 | 5 | 150 | 31 | 1.05 |
| NY12-18 | 206 | 145 | 1.42 | 0.04926 | 0.00573 | 0.15529 | 0.01795 | 0.02287 | 0.00048 | 0.00645 | 0.00117 | 160 | 255 | 147 | 16 | 146 | 3 | 130 | 23 | 0.99 |
| NY12-19 | 200 | 217 | 0.92 | 0.05070 | 0.00372 | 0.16074 | 0.01172 | 0.02300 | 0.00041 | 0.00681 | 0.00128 | 227 | 168 | 151 | 10 | 147 | 3 | 137 | 26 | 0.97 |
| NY12-20 | 180 | 108 | 1.67 | 0.05079 | 0.01428 | 0.16217 | 0.04517 | 0.02315 | 0.00100 | 0.00697 | 0.00268 | 231 | 496 | 153 | 39 | 148 | 6 | 140 | 54 | 0.97 |

N13, Minhou (Guo et al., 2012; Liu et al., 2016)

|         |      |     |      |         |         |         |         |         |         |         |         |     |     |     |    |     |   |     |     |      |
|---------|------|-----|------|---------|---------|---------|---------|---------|---------|---------|---------|-----|-----|-----|----|-----|---|-----|-----|------|
| NY14-01 | 378  | 408 | 0.93 | 0.04836 | 0.01063 | 0.10284 | 0.02237 | 0.01543 | 0.00059 | 0.00231 | 0.00033 | 117 | 383 | 99  | 21 | 99  | 4 | 47  | 7   | 1.00 |
| NY14-02 | 523  | 521 | 1    | 0.04895 | 0.00404 | 0.10414 | 0.00858 | 0.01544 | 0.00030 | 0.00287 | 0.00030 | 145 | 187 | 101 | 8  | 99  | 2 | 58  | 6   | 0.98 |
| NY14-03 | 820  | 741 | 1.11 | 0.04610 | 0.00699 | 0.09911 | 0.01481 | 0.01560 | 0.00053 | 0.00108 | 0.00012 | 3   | 275 | 96  | 14 | 100 | 3 | 22  | 2   | 1.04 |
| NY14-04 | 289  | 304 | 0.95 | 0.04928 | 0.00669 | 0.10539 | 0.01425 | 0.01552 | 0.00034 | 0.00308 | 0.00043 | 161 | 277 | 102 | 13 | 99  | 2 | 62  | 9   | 0.97 |
| NY14-05 | 632  | 574 | 1.1  | 0.04788 | 0.00541 | 0.10035 | 0.01123 | 0.01521 | 0.00036 | 0.00402 | 0.00102 | 93  | 238 | 97  | 10 | 97  | 2 | 81  | 21  | 1.00 |
| NY14-06 | 464  | 463 | 1    | 0.04794 | 0.00457 | 0.10114 | 0.00962 | 0.01531 | 0.00030 | 0.00255 | 0.00030 | 96  | 212 | 98  | 9  | 98  | 2 | 51  | 6   | 1.00 |
| NY14-07 | 483  | 547 | 0.88 | 0.04792 | 0.00629 | 0.10172 | 0.01323 | 0.01540 | 0.00041 | 0.00300 | 0.00067 | 95  | 262 | 98  | 12 | 99  | 3 | 61  | 14  | 1.01 |
| NY14-08 | 356  | 317 | 1.12 | 0.04788 | 0.00672 | 0.09985 | 0.01396 | 0.01513 | 0.00034 | 0.00298 | 0.00050 | 93  | 279 | 97  | 13 | 97  | 2 | 60  | 10  | 1.00 |
| NY14-09 | 197  | 224 | 0.88 | 0.04799 | 0.00921 | 0.10028 | 0.01919 | 0.01516 | 0.00038 | 0.00243 | 0.00037 | 99  | 341 | 97  | 18 | 97  | 2 | 49  | 7   | 1.00 |
| NY14-10 | 598  | 602 | 0.99 | 0.04803 | 0.00438 | 0.10278 | 0.00932 | 0.01552 | 0.00034 | 0.00169 | 0.00021 | 101 | 202 | 99  | 9  | 99  | 2 | 34  | 4   | 1.00 |
| NY14-11 | 436  | 480 | 0.91 | 0.04670 | 0.00524 | 0.09938 | 0.01111 | 0.01544 | 0.00032 | 0.00413 | 0.00107 | 34  | 227 | 96  | 10 | 99  | 2 | 83  | 22  | 1.03 |
| NY14-12 | 400  | 443 | 0.9  | 0.04814 | 0.00514 | 0.10351 | 0.01102 | 0.01560 | 0.00032 | 0.00270 | 0.00043 | 106 | 236 | 100 | 10 | 100 | 2 | 54  | 9   | 1.00 |
| NY14-13 | 714  | 512 | 1.39 | 0.04752 | 0.00565 | 0.10321 | 0.01221 | 0.01575 | 0.00037 | 0.00324 | 0.00067 | 75  | 241 | 100 | 11 | 101 | 2 | 65  | 13  | 1.01 |
| NY14-14 | 1225 | 834 | 1.47 | 0.04763 | 0.00594 | 0.10040 | 0.01234 | 0.01529 | 0.00045 | 0.00194 | 0.00038 | 81  | 253 | 97  | 11 | 98  | 3 | 39  | 8   | 1.01 |
| NY14-15 | 262  | 237 | 1.11 | 0.04817 | 0.02213 | 0.09954 | 0.04533 | 0.01500 | 0.00097 | 0.00319 | 0.00186 | 408 | 793 | 96  | 42 | 96  | 6 | 64  | 37  | 1.00 |
| NY14-16 | 198  | 208 | 0.95 | 0.04796 | 0.01542 | 0.10327 | 0.03300 | 0.01562 | 0.00064 | 0.00819 | 0.00733 | 97  | 537 | 100 | 30 | 100 | 4 | 165 | 147 | 1.00 |
| NY14-17 | 418  | 334 | 1.25 | 0.04956 | 0.01230 | 0.10602 | 0.02606 | 0.01552 | 0.00061 | 0.01981 | 0.05082 | 174 | 437 | 102 | 24 | 99  | 4 | 396 | ### | 0.97 |
| NY14-18 | 422  | 441 | 0.96 | 0.04881 | 0.01030 | 0.10372 | 0.02158 | 0.01541 | 0.00061 | 0.00162 | 0.00043 | 139 | 376 | 100 | 20 | 99  | 4 | 33  | 9   | 0.99 |
| NY14-19 | 837  | 768 | 1.09 | 0.04625 | 0.00543 | 0.09751 | 0.01132 | 0.01529 | 0.00040 | 0.00378 | 0.00172 | 11  | 233 | 94  | 10 | 98  | 3 | 76  | 35  | 1.04 |
| NY14-20 | 251  | 248 | 1.01 | 0.04807 | 0.01376 | 0.10231 | 0.02909 | 0.01544 | 0.00059 | 0.00899 | 0.00837 | 103 | 478 | 99  | 27 | 99  | 4 | 181 | 168 | 1.00 |

|         |     |     |      |         |         |         |         |         |         |         |         |     |     |     |    |     |   |     |    |      |
|---------|-----|-----|------|---------|---------|---------|---------|---------|---------|---------|---------|-----|-----|-----|----|-----|---|-----|----|------|
| NY15-01 | 254 | 270 | 0.94 | 0.04804 | 0.00782 | 0.10369 | 0.01681 | 0.01566 | 0.00037 | 0.00300 | 0.00047 | 101 | 301 | 100 | 15 | 100 | 2 | 61  | 9  | 1.00 |
| NY15-02 | 344 | 358 | 0.96 | 0.04725 | 0.01287 | 0.10190 | 0.02749 | 0.01565 | 0.00066 | 0.00351 | 0.00123 | 62  | 451 | 99  | 25 | 100 | 4 | 71  | 25 | 1.01 |
| NY15-03 | 210 | 204 | 1.03 | 0.04778 | 0.01171 | 0.10558 | 0.02576 | 0.01602 | 0.00049 | 0.00469 | 0.00152 | 88  | 414 | 102 | 24 | 102 | 3 | 95  | 31 | 1.00 |
| NY15-04 | 262 | 235 | 1.12 | 0.04794 | 0.01020 | 0.10410 | 0.02204 | 0.01575 | 0.00045 | 0.00236 | 0.00036 | 96  | 369 | 101 | 20 | 101 | 3 | 48  | 7  | 1.00 |
| NY15-05 | 246 | 228 | 1.08 | 0.04898 | 0.01125 | 0.10866 | 0.02482 | 0.01609 | 0.00050 | 0.00609 | 0.00245 | 147 | 402 | 105 | 23 | 103 | 3 | 123 | 49 | 0.98 |
| NY15-06 | 314 | 321 | 0.98 | 0.04741 | 0.01281 | 0.10348 | 0.02775 | 0.01584 | 0.00063 | 0.00249 | 0.00087 | 70  | 447 | 100 | 26 | 101 | 4 | 50  | 18 | 1.01 |
| NY15-07 | 125 | 149 | 0.84 | 0.04874 | 0.01619 | 0.13871 | 0.04579 | 0.02065 | 0.00086 | 0.00521 | 0.00191 | 135 | 561 | 132 | 41 | 132 | 5 | 105 | 38 | 1.00 |
| NY15-08 | 243 | 233 | 1.05 | 0.04895 | 0.00945 | 0.10344 | 0.01989 | 0.01533 | 0.00039 | 0.00328 | 0.00092 | 145 | 352 | 100 | 18 | 98  | 2 | 66  | 19 | 0.98 |
| NY15-09 | 203 | 196 | 1.04 | 0.04755 | 0.01115 | 0.10201 | 0.02383 | 0.01556 | 0.00044 | 0.00269 | 0.00069 | 77  | 397 | 99  | 22 | 100 | 3 | 54  | 14 | 1.01 |
| NY15-10 | 177 | 171 | 1.03 | 0.04839 | 0.01405 | 0.10329 | 0.02985 | 0.01549 | 0.00053 | 0.00182 | 0.00036 | 118 | 487 | 100 | 27 | 99  | 3 | 37  | 7  | 0.99 |
| NY15-11 | 326 | 357 | 0.91 | 0.04648 | 0.01090 | 0.09928 | 0.02305 | 0.01549 | 0.00060 | 0.00092 | 0.00015 | 23  | 389 | 96  | 21 | 99  | 4 | 19  | 3  | 1.03 |
| NY15-12 | 221 | 237 | 0.93 | 0.04697 | 0.02739 | 0.09986 | 0.05779 | 0.01543 | 0.00116 | 0.00367 | 0.00212 | 48  | 960 | 97  | 53 | 99  | 7 | 74  | 43 | 1.02 |
| NY15-13 | 249 | 176 | 1.42 | 0.04879 | 0.01643 | 0.10707 | 0.03585 | 0.01592 | 0.00064 | 0.00250 | 0.00050 | 138 | 569 | 103 | 33 | 102 | 4 | 50  | 10 | 0.99 |
| NY15-14 | 177 | 176 | 1    | 0.04797 | 0.01386 | 0.10541 | 0.03033 | 0.01594 | 0.00053 | 0.00443 | 0.00124 | 98  | 483 | 102 | 28 | 102 | 3 | 89  | 25 | 1.00 |
| NY15-15 | 285 | 292 | 0.98 | 0.04965 | 0.02046 | 0.10577 | 0.04318 | 0.01544 | 0.00092 | 0.00423 | 0.00221 | 179 | 711 | 102 | 40 | 99  | 6 | 85  | 44 | 0.97 |
| NY15-16 | 316 | 251 | 1.26 | 0.04802 | 0.01226 | 0.10156 | 0.02579 | 0.01534 | 0.00051 | 0.00388 | 0.00135 | 100 | 430 | 98  | 24 | 98  | 3 | 78  | 27 | 1.00 |
| NY15-17 | 437 | 370 | 1.18 | 0.05224 | 0.00893 | 0.11101 | 0.01880 | 0.01541 | 0.00046 | 0.00546 | 0.00261 | 296 | 348 | 107 | 17 | 99  | 3 | 110 | 52 | 0.93 |
| NY15-18 | 316 | 257 | 1.23 | 0.04750 | 0.01231 | 0.10400 | 0.02677 | 0.01588 | 0.00056 | 0.00390 | 0.00147 | 74  | 432 | 100 | 25 | 102 | 4 | 79  | 30 | 1.02 |
| NY15-19 | 259 | 263 | 0.98 | 0.05156 | 0.00847 | 0.11093 | 0.01814 | 0.01561 | 0.00038 | 0.00298 | 0.00074 | 266 | 333 | 107 | 17 | 100 | 2 | 60  | 15 | 0.93 |
| NY15-20 | 181 | 155 | 1.17 | 0.04840 | 0.01507 | 0.10605 | 0.03288 | 0.01589 | 0.00054 | 0.00393 | 0.00165 | 119 | 523 | 102 | 30 | 102 | 3 | 79  | 33 | 1.00 |

|         |     |     |      |         |         |         |         |         |         |         |         |     |     |     |    |     |   |     |    |      |
|---------|-----|-----|------|---------|---------|---------|---------|---------|---------|---------|---------|-----|-----|-----|----|-----|---|-----|----|------|
| NY16-01 | 279 | 300 | 0.93 | 0.04747 | 0.00695 | 0.10149 | 0.01467 | 0.01551 | 0.00047 | 0.00487 | 0.00100 | 73  | 275 | 98  | 14 | 99  | 3 | 98  | 20 | 1.01 |
| NY16-02 | 290 | 327 | 0.89 | 0.04809 | 0.00562 | 0.10213 | 0.01177 | 0.01541 | 0.00041 | 0.00518 | 0.00103 | 104 | 247 | 99  | 11 | 99  | 3 | 104 | 21 | 1.00 |
| NY16-03 | 273 | 304 | 0.9  | 0.04442 | 0.00400 | 0.09387 | 0.00841 | 0.01533 | 0.00031 | 0.00547 | 0.00075 | -49 | 180 | 91  | 8  | 98  | 2 | 110 | 15 | 1.08 |
| NY16-04 | 190 | 218 | 0.87 | 0.04825 | 0.01137 | 0.10680 | 0.02482 | 0.01605 | 0.00071 | 0.00738 | 0.00264 | 112 | 409 | 103 | 23 | 103 | 5 | 149 | 53 | 1.00 |
| NY16-05 | 296 | 353 | 0.84 | 0.04953 | 0.00300 | 0.11025 | 0.00666 | 0.01615 | 0.00028 | 0.00480 | 0.00066 | 173 | 138 | 106 | 6  | 103 | 2 | 97  | 13 | 0.97 |
| NY16-06 | 328 | 353 | 0.93 | 0.04531 | 0.00282 | 0.09594 | 0.00598 | 0.01536 | 0.00026 | 0.00497 | 0.00069 | -4  | 136 | 93  | 6  | 98  | 2 | 100 | 14 | 1.05 |
| NY16-07 | 359 | 352 | 1.02 | 0.05266 | 0.00566 | 0.11539 | 0.01216 | 0.01590 | 0.00043 | 0.00532 | 0.00163 | 314 | 246 | 111 | 11 | 102 | 3 | 107 | 33 | 0.92 |
| NY16-08 | 219 | 244 | 0.9  | 0.04793 | 0.00921 | 0.10092 | 0.01909 | 0.01527 | 0.00057 | 0.00656 | 0.00348 | 96  | 341 | 98  | 18 | 98  | 4 | 132 | 70 | 1.00 |
| NY16-09 | 343 | 370 | 0.93 | 0.04597 | 0.00471 | 0.09700 | 0.00978 | 0.01531 | 0.00037 | 0.00425 | 0.00115 | -4  | 210 | 94  | 9  | 98  | 2 | 86  | 23 | 1.04 |
| NY16-10 | 339 | 314 | 1.08 | 0.05032 | 0.00656 | 0.10826 | 0.01381 | 0.01561 | 0.00049 | 0.00659 | 0.00260 | 210 | 278 | 104 | 13 | 100 | 3 | 133 | 52 | 0.96 |
| NY16-11 | 534 | 506 | 1.05 | 0.04745 | 0.00238 | 0.09827 | 0.00495 | 0.01502 | 0.00025 | 0.00503 | 0.00070 | 72  | 111 | 95  | 5  | 96  | 2 | 101 | 14 | 1.01 |
| NY16-12 | 688 | 708 | 0.97 | 0.04960 | 0.00178 | 0.10630 | 0.00389 | 0.01554 | 0.00025 | 0.00504 | 0.00067 | 176 | 85  | 103 | 4  | 99  | 2 | 102 | 13 | 0.96 |
| NY16-13 | 274 | 286 | 0.96 | 0.04529 | 0.00374 | 0.09545 | 0.00788 | 0.01529 | 0.00028 | 0.00491 | 0.00070 | -5  | 179 | 93  | 7  | 98  | 2 | 99  | 14 | 1.05 |
| NY16-14 | 218 | 233 | 0.94 | 0.04682 | 0.00551 | 0.09696 | 0.01131 | 0.01502 | 0.00034 | 0.00574 | 0.00123 | 40  | 238 | 94  | 10 | 96  | 2 | 116 | 25 | 1.02 |
| NY16-15 | 246 | 263 | 0.93 | 0.04621 | 0.00417 | 0.09537 | 0.00856 | 0.01497 | 0.00028 | 0.00562 | 0.00104 | 9   | 197 | 92  | 8  | 96  | 2 | 113 | 21 | 1.04 |
| NY16-16 | 558 | 511 | 1.09 | 0.04767 | 0.00230 | 0.10268 | 0.00499 | 0.01562 | 0.00026 | 0.00510 | 0.00081 | 83  | 108 | 99  | 5  | 100 | 2 | 103 | 16 | 1.01 |
| NY16-17 | 360 | 325 | 1.11 | 0.04642 | 0.00341 | 0.09602 | 0.00702 | 0.01500 | 0.00027 | 0.00547 | 0.00103 | 19  | 163 | 93  | 7  | 96  | 2 | 110 | 21 | 1.03 |



|             |     |     |      |         |         |         |         |         |         |         |         |     |     |     |    |     |   |     |    |      |
|-------------|-----|-----|------|---------|---------|---------|---------|---------|---------|---------|---------|-----|-----|-----|----|-----|---|-----|----|------|
| NY16-18     | 458 | 467 | 0.98 | 0.04821 | 0.00248 | 0.10378 | 0.00535 | 0.01561 | 0.00026 | 0.00542 | 0.00100 | 110 | 116 | 100 | 5  | 100 | 2 | 109 | 20 | 1.00 |
| NY16-19     | 431 | 430 | 1    | 0.04646 | 0.00472 | 0.09832 | 0.00985 | 0.01534 | 0.00038 | 0.00450 | 0.00122 | 22  | 213 | 95  | 9  | 98  | 2 | 91  | 25 | 1.03 |
| NY16-20     | 356 | 347 | 1.03 | 0.04795 | 0.00343 | 0.10242 | 0.00730 | 0.01549 | 0.00029 | 0.00513 | 0.00109 | 97  | 160 | 99  | 7  | 99  | 2 | 103 | 22 | 1.00 |
| NY17-01     | 796 | 697 | 1.14 | 0.04727 | 0.00181 | 0.10015 | 0.00390 | 0.01537 | 0.00024 | 0.00519 | 0.00066 | 63  | 85  | 97  | 4  | 98  | 2 | 105 | 13 | 1.01 |
| NY17-02     | 887 | 715 | 1.24 | 0.04903 | 0.00327 | 0.10066 | 0.00664 | 0.01489 | 0.00031 | 0.00438 | 0.00075 | 149 | 151 | 97  | 6  | 95  | 2 | 88  | 15 | 0.98 |
| NY17-03     | 406 | 422 | 0.96 | 0.04375 | 0.00272 | 0.09410 | 0.00585 | 0.01560 | 0.00026 | 0.00527 | 0.00073 | -84 | 135 | 91  | 5  | 100 | 2 | 106 | 15 | 1.10 |
| NY17-04     | 407 | 413 | 0.99 | 0.04389 | 0.00289 | 0.09388 | 0.00617 | 0.01552 | 0.00027 | 0.00499 | 0.00070 | -76 | 143 | 91  | 6  | 99  | 2 | 101 | 14 | 1.09 |
| NY17-05     | 360 | 378 | 0.95 | 0.04965 | 0.00370 | 0.10778 | 0.00797 | 0.01574 | 0.00031 | 0.00469 | 0.00073 | 179 | 170 | 104 | 7  | 101 | 2 | 95  | 15 | 0.97 |
| NY17-06     | 275 | 268 | 1.03 | 0.04546 | 0.00391 | 0.09778 | 0.00836 | 0.01560 | 0.00028 | 0.00529 | 0.00085 | -31 | 187 | 95  | 8  | 100 | 2 | 107 | 17 | 1.05 |
| NY17-07     | 593 | 602 | 0.98 | 0.04741 | 0.00222 | 0.09791 | 0.00459 | 0.01498 | 0.00024 | 0.00458 | 0.00077 | 70  | 103 | 95  | 4  | 96  | 2 | 92  | 15 | 1.01 |
| NY17-08     | 502 | 529 | 0.95 | 0.05002 | 0.00445 | 0.10865 | 0.00948 | 0.01575 | 0.00038 | 0.00495 | 0.00139 | 196 | 203 | 105 | 9  | 101 | 2 | 100 | 28 | 0.96 |
| NY17-09     | 257 | 280 | 0.92 | 0.04787 | 0.00423 | 0.09818 | 0.00864 | 0.01488 | 0.00028 | 0.00395 | 0.00063 | 93  | 199 | 95  | 8  | 95  | 2 | 80  | 13 | 1.00 |
| NY17-10     | 360 | 366 | 0.98 | 0.04389 | 0.00317 | 0.09453 | 0.00681 | 0.01562 | 0.00027 | 0.00438 | 0.00078 | -76 | 156 | 92  | 6  | 100 | 2 | 88  | 16 | 1.09 |
| NY17-11     | 496 | 486 | 1.02 | 0.05307 | 0.00552 | 0.11467 | 0.01172 | 0.01569 | 0.00042 | 0.00368 | 0.00070 | 332 | 238 | 110 | 11 | 100 | 3 | 74  | 14 | 0.91 |
| NY17-12     | 360 | 377 | 0.95 | 0.04995 | 0.00335 | 0.10341 | 0.00689 | 0.01502 | 0.00027 | 0.00395 | 0.00056 | 193 | 153 | 100 | 6  | 96  | 2 | 80  | 11 | 0.96 |
| NY17-13     | 647 | 450 | 1.44 | 0.05011 | 0.00266 | 0.10211 | 0.00543 | 0.01478 | 0.00024 | 0.00391 | 0.00045 | 200 | 123 | 99  | 5  | 95  | 2 | 79  | 9  | 0.96 |
| NY17-14     | 889 | 705 | 1.26 | 0.05038 | 0.00208 | 0.10727 | 0.00446 | 0.01545 | 0.00025 | 0.00417 | 0.00053 | 213 | 98  | 103 | 4  | 99  | 2 | 84  | 11 | 0.96 |
| NY17-15     | 406 | 409 | 0.99 | 0.04817 | 0.00273 | 0.10274 | 0.00583 | 0.01547 | 0.00025 | 0.00428 | 0.00054 | 108 | 127 | 99  | 5  | 99  | 2 | 86  | 11 | 1.00 |
| NY17-16     | 292 | 287 | 1.02 | 0.04809 | 0.00492 | 0.09784 | 0.00993 | 0.01476 | 0.00032 | 0.00431 | 0.00072 | 104 | 225 | 95  | 9  | 94  | 2 | 87  | 14 | 0.99 |
| NY17-17     | 837 | 975 | 0.86 | 0.04705 | 0.00284 | 0.09650 | 0.00577 | 0.01488 | 0.00031 | 0.00295 | 0.00059 | 52  | 133 | 94  | 5  | 95  | 2 | 60  | 12 | 1.01 |
| NY17-18     | 514 | 497 | 1.03 | 0.05027 | 0.00281 | 0.10286 | 0.00572 | 0.01484 | 0.00026 | 0.00420 | 0.00074 | 207 | 129 | 99  | 5  | 95  | 2 | 85  | 15 | 0.96 |
| NY17-19     | 967 | 636 | 1.52 | 0.04664 | 0.00202 | 0.09586 | 0.00417 | 0.01491 | 0.00024 | 0.00439 | 0.00075 | 31  | 93  | 93  | 4  | 95  | 2 | 89  | 15 | 1.02 |
| NY17-20     | 424 | 413 | 1.03 | 0.04963 | 0.00296 | 0.10647 | 0.00633 | 0.01556 | 0.00027 | 0.00459 | 0.00085 | 178 | 136 | 103 | 6  | 100 | 2 | 93  | 17 | 0.97 |
| 09GF-84A 01 | 892 | 834 | 1.07 |         |         | 0.101   | 2.52    | 0.016   | 1.52    |         |         |     |     |     |    | 100 |   | 1.5 |    |      |
| 09GF-84A 02 | 764 | 941 | 0.81 |         |         | 0.104   | 2.25    | 0.016   | 1.54    |         |         |     |     |     |    | 99  |   | 1.5 |    |      |
| 09GF-84A 03 | 238 | 309 | 0.77 |         |         | 0.099   | 4.44    | 0.015   | 1.57    |         |         |     |     |     |    | 97  |   | 1.5 |    |      |
| 09GF-84A 04 | 547 | 759 | 0.72 |         |         | 0.102   | 2.53    | 0.016   | 1.52    |         |         |     |     |     |    | 100 |   | 1.5 |    |      |
| 09GF-84A 05 | 578 | 617 | 0.94 |         |         | 0.101   | 2.80    | 0.015   | 1.51    |         |         |     |     |     |    | 99  |   | 1.5 |    |      |
| 09GF-84A 06 | 157 | 197 | 0.80 |         |         | 0.101   | 3.87    | 0.016   | 1.59    |         |         |     |     |     |    | 100 |   | 1.6 |    |      |
| 09GF-84A 07 | 326 | 264 | 1.23 |         |         | 0.095   | 3.71    | 0.016   | 1.57    |         |         |     |     |     |    | 99  |   | 1.5 |    |      |
| 09GF-84A 08 | 536 | 593 | 0.90 |         |         | 0.100   | 2.86    | 0.015   | 1.56    |         |         |     |     |     |    | 99  |   | 1.5 |    |      |
| 09GF-84A 09 | 814 | 935 | 0.87 |         |         | 0.100   | 2.66    | 0.015   | 1.83    |         |         |     |     |     |    | 99  |   | 1.8 |    |      |
| 09GF-84A 10 | 451 | 439 | 1.03 |         |         | 0.103   | 3.72    | 0.016   | 1.54    |         |         |     |     |     |    | 100 |   | 1.5 |    |      |
| 09GF-84A 11 | 597 | 689 | 0.87 |         |         | 0.100   | 2.43    | 0.015   | 1.52    |         |         |     |     |     |    | 98  |   | 1.5 |    |      |
| 09GF-84A 12 | 524 | 484 | 1.08 |         |         | 0.101   | 2.89    | 0.016   | 1.78    |         |         |     |     |     |    | 99  |   | 1.8 |    |      |
| 09GF-84A 13 | 406 | 407 | 1.00 |         |         | 0.103   | 3.26    | 0.015   | 1.51    |         |         |     |     |     |    | 99  |   | 1.5 |    |      |
| 09GF-84A 14 | 487 | 393 | 1.24 |         |         | 0.100   | 4.27    | 0.016   | 1.55    |         |         |     |     |     |    | 100 |   | 1.5 |    |      |
| 09GF-84A 15 | 332 | 551 | 0.60 |         |         | 0.100   | 3.13    | 0.015   | 1.54    |         |         |     |     |     |    | 97  |   | 1.5 |    |      |
| 09GF-84A 16 | 316 | 316 | 1.00 |         |         | 0.101   | 4.74    | 0.015   | 1.56    |         |         |     |     |     |    | 98  |   | 1.5 |    |      |
| 09GF-96 01  | 68  | 142 | 0.48 |         |         | 0.1131  | 0.0087  | 0.0166  | 0.0005  |         |         |     |     |     |    | 106 |   | 3   |    |      |
| 09GF-96 02  | 179 | 269 | 0.66 |         |         | 0.1263  | 0.0045  | 0.0183  | 0.0003  |         |         |     |     |     |    | 117 |   | 2   |    |      |
| 09GF-96 03  | 314 | 347 | 0.91 |         |         | 0.1089  | 0.0041  | 0.0161  | 0.0003  |         |         |     |     |     |    | 103 |   | 2   |    |      |
| 09GF-96 04  | 248 | 244 | 1.01 |         |         | 0.1008  | 0.0049  | 0.0158  | 0.0003  |         |         |     |     |     |    | 101 |   | 2   |    |      |
| 09GF-96 05  | 137 | 166 | 0.83 |         |         | 0.1077  | 0.0071  | 0.0157  | 0.0004  |         |         |     |     |     |    | 100 |   | 3   |    |      |
| 09GF-96 06  | 221 | 329 | 0.67 |         |         | 0.1089  | 0.0054  | 0.0156  | 0.0003  |         |         |     |     |     |    | 100 |   | 2   |    |      |
| 09GF-96 07  | 187 | 264 | 0.71 |         |         | 0.1027  | 0.0046  | 0.0155  | 0.0003  |         |         |     |     |     |    | 99  |   | 2   |    |      |
| 09GF-96 08  | 256 | 335 | 0.76 |         |         | 0.1043  | 0.0044  | 0.0155  | 0.0003  |         |         |     |     |     |    | 99  |   | 2   |    |      |
| 09GF-96 09  | 380 | 386 | 0.98 |         |         | 0.1014  | 0.0068  | 0.0150  | 0.0002  |         |         |     |     |     |    | 96  |   | 2   |    |      |
| 09GF-96 10  | 519 | 393 | 1.32 |         |         | 0.1129  | 0.0036  | 0.0156  | 0.0002  |         |         |     |     |     |    | 100 |   | 1   |    |      |
| 09GF-96 11  | 327 | 369 | 0.89 |         |         | 0.1015  | 0.0036  | 0.0156  | 0.0003  |         |         |     |     |     |    | 100 |   | 2   |    |      |
| 09GF-96 12  | 326 | 446 | 0.73 |         |         | 0.1040  | 0.0034  | 0.0156  | 0.0002  |         |         |     |     |     |    | 100 |   | 2   |    |      |
| 09GF-96 13  | 464 | 544 | 0.85 |         |         | 0.1005  | 0.0032  | 0.0156  | 0.0002  |         |         |     |     |     |    | 100 |   | 1   |    |      |
| 09GF-96 14  | 298 | 425 | 0.70 |         |         | 0.1006  | 0.0037  | 0.0162  | 0.0003  |         |         |     |     |     |    | 103 |   | 2   |    |      |
| 09GF-96 15  | 406 | 422 | 0.96 |         |         | 0.1279  | 0.0043  | 0.0176  | 0.0003  |         |         |     |     |     |    | 112 |   | 2   |    |      |
| 09GF-96 16  | 269 | 376 | 0.72 |         |         | 0.1095  | 0.0037  | 0.0158  | 0.0003  |         |         |     |     |     |    | 101 |   | 2   |    |      |
| 09GF-96 17  | 323 | 432 | 0.75 |         |         | 0.1039  | 0.0037  | 0.0159  | 0.0003  |         |         |     |     |     |    | 102 |   | 2   |    |      |
| 09GF-96 18  | 390 | 315 | 1.24 |         |         | 0.1374  | 0.0071  | 0.0171  | 0.0004  |         |         |     |     |     |    | 109 |   | 2   |    |      |
| 09GF-96 19  | 262 | 380 | 0.69 |         |         | 0.1073  | 0.0037  | 0.0156  | 0.0003  |         |         |     |     |     |    | 100 |   | 2   |    |      |
| 09GF-96 20  | 140 | 235 | 0.60 |         |         | 0.1060  | 0.0043  | 0.0156  | 0.0003  |         |         |     |     |     |    | 100 |   | 2   |    |      |
| 09GF-96 21  | 126 | 170 | 0.74 |         |         | 0.1010  | 0.0051  | 0.0156  | 0.0003  |         |         |     |     |     |    | 100 |   | 2   |    |      |
| 09GF-96 22  | 178 | 253 | 0.70 |         |         | 0.1020  | 0.0116  | 0.0159  | 0.0004  |         |         |     |     |     |    | 102 |   | 3   |    |      |
| 09GF-96 23  | 249 | 372 | 0.67 |         |         | 0.1101  | 0.0036  | 0.0156  | 0.0002  |         |         |     |     |     |    | 100 |   | 2   |    |      |
| 09GF-96 24  | 168 | 221 | 0.76 |         |         | 0.1497  | 0.0092  | 0.0172  | 0.0005  |         |         |     |     |     |    | 110 |   | 3   |    |      |
| 09GF-103 01 | 320 | 436 | 0.73 |         |         | 0.1036  | 0.0030  | 0.0158  | 0.0003  |         |         |     |     |     |    | 101 |   | 2   |    |      |
| 09GF-103 02 | 519 | 495 | 1.05 |         |         | 0.1118  | 0.0046  | 0.0166  | 0.0004  |         |         |     |     |     |    | 106 |   | 2   |    |      |
| 09GF-103 03 | 661 | 604 | 1.09 |         |         | 0.1054  | 0.0031  | 0.0157  | 0.0003  |         |         |     |     |     |    | 100 |   | 2   |    |      |
| 09GF-103 04 | 190 | 276 | 0.69 |         |         | 0.1051  | 0.0038  | 0.0155  | 0.0003  |         |         |     |     |     |    | 99  |   | 2   |    |      |
| 09GF-103 05 | 269 | 376 | 0.72 |         |         | 0.1065  | 0.0036  | 0.0156  | 0.0003  |         |         |     |     |     |    | 100 |   | 2   |    |      |
| 09GF-103 06 | 352 | 493 | 0.71 |         |         | 0.1051  | 0.0028  | 0.0161  | 0.0003  |         |         |     |     |     |    | 103 |   | 2   |    |      |
| 09GF-103 07 | 165 | 212 | 0.78 |         |         | 0.1046  | 0.0040  | 0.0154  | 0.0003  |         |         |     |     |     |    | 99  |   | 2   |    |      |
| 09GF-103 08 | 229 | 283 | 0.81 |         |         | 0.1222  | 0.0038  | 0.0149  | 0.0003  |         |         |     |     |     |    | 95  |   | 2   |    |      |
| 09GF-103 09 | 143 | 210 | 0.68 |         |         | 0.0975  | 0.0052  | 0.0154  | 0.0004  |         |         |     |     |     |    | 98  |   | 2   |    |      |
| 09GF-103 10 | 229 | 309 | 0.74 |         |         | 0.0962  | 0.0032  | 0.0158  | 0.0003  |         |         |     |     |     |    | 101 |   | 2   |    |      |
| 09GF-103 11 | 253 | 342 | 0.74 |         |         | 0.1004  | 0.0031  | 0.0158  | 0.0003  |         |         |     |     |     |    | 101 |   | 2   |    |      |
| 09GF-103 12 | 539 | 618 | 0.87 |         |         | 0.1053  | 0.0030  | 0.0156  | 0.0003  |         |         |     |     |     |    | 100 |   | 2   |    |      |



|              |     |      |      |        |        |        |        |     |     |
|--------------|-----|------|------|--------|--------|--------|--------|-----|-----|
| 09GF-103 13  | 250 | 360  | 0.69 | 0.1026 | 0.0034 | 0.0156 | 0.0003 | 100 | 2   |
| 09GF-103 14  | 364 | 509  | 0.71 | 0.1003 | 0.0026 | 0.0156 | 0.0003 | 99  | 2   |
| 09GF-103 15  | 443 | 546  | 0.81 | 0.1015 | 0.0039 | 0.0149 | 0.0003 | 95  | 2   |
| 09GF-103 16  | 253 | 395  | 0.64 | 0.0999 | 0.0031 | 0.0152 | 0.0003 | 97  | 2   |
| 09GF-103 17  | 256 | 390  | 0.66 | 0.1021 | 0.0034 | 0.0151 | 0.0003 | 97  | 2   |
| 09GF-103 18  | 227 | 339  | 0.67 | 0.1046 | 0.0037 | 0.0155 | 0.0003 | 99  | 2   |
| 09GF-103 19  | 497 | 753  | 0.66 | 0.1032 | 0.0021 | 0.0157 | 0.0002 | 101 | 1   |
| 09GF-103 20  | 246 | 269  | 0.91 | 0.1035 | 0.0042 | 0.0157 | 0.0003 | 101 | 2   |
| 09GF-103 21  | 375 | 512  | 0.73 | 0.1005 | 0.0035 | 0.0151 | 0.0003 | 97  | 2   |
| 09GF-103 22  | 144 | 235  | 0.62 | 0.1266 | 0.0046 | 0.0152 | 0.0003 | 97  | 2   |
| 09GF-103 23  | 285 | 403  | 0.71 | 0.1007 | 0.0030 | 0.0153 | 0.0003 | 98  | 2   |
| 09GF-103 24  | 251 | 457  | 0.55 | 0.1024 | 0.0047 | 0.0156 | 0.0004 | 100 | 2   |
|              |     |      |      |        |        |        |        |     |     |
| 09GF-104A 01 | 352 | 338  | 1.04 | 0.106  | 3.05   | 0.015  | 1.56   | 98  | 1.5 |
| 09GF-104A 02 | 349 | 398  | 0.88 | 0.099  | 3.30   | 0.015  | 1.57   | 97  | 1.5 |
| 09GF-104A 03 | 523 | 499  | 1.05 | 0.098  | 3.27   | 0.015  | 1.54   | 95  | 1.5 |
| 09GF-104A 04 | 496 | 478  | 1.04 | 0.100  | 3.47   | 0.015  | 1.56   | 97  | 1.5 |
| 09GF-104A 05 | 152 | 258  | 0.59 | 0.101  | 3.91   | 0.015  | 1.76   | 98  | 1.7 |
| 09GF-104A 06 | 473 | 528  | 0.90 | 0.097  | 2.66   | 0.015  | 1.57   | 98  | 1.5 |
| 09GF-104A 07 | 593 | 641  | 0.92 | 0.104  | 3.86   | 0.015  | 1.56   | 98  | 1.5 |
| 09GF-104A 08 | 416 | 433  | 0.96 | 0.100  | 2.81   | 0.015  | 1.52   | 99  | 1.5 |
| 09GF-104A 09 | 121 | 151  | 0.80 | 0.104  | 4.29   | 0.015  | 1.82   | 98  | 1.8 |
| 09GF-104A 10 | 669 | 631  | 1.06 | 0.100  | 3.11   | 0.015  | 1.54   | 98  | 1.5 |
| 09GF-104A 11 | 451 | 493  | 0.92 | 0.102  | 3.08   | 0.016  | 1.52   | 100 | 1.5 |
| 09GF-104A 12 | 463 | 404  | 1.14 | 0.099  | 3.25   | 0.015  | 1.54   | 98  | 1.5 |
| 09GF-104A 13 | 173 | 259  | 0.67 | 0.102  | 3.44   | 0.016  | 1.57   | 100 | 1.6 |
| 09GF-104A 14 | 631 | 462  | 1.37 | 0.100  | 3.20   | 0.015  | 1.58   | 96  | 1.5 |
| 09GF-104A 15 | 352 | 374  | 0.94 | 0.098  | 4.40   | 0.015  | 1.56   | 98  | 1.5 |
| 09GF-104A 16 | 470 | 411  | 1.14 | 0.100  | 2.92   | 0.015  | 1.55   | 97  | 1.5 |
|              |     |      |      |        |        |        |        |     |     |
| 09GF-108 01  | 202 | 194  | 1.04 | 0.101  | 7.83   | 0.015  | 1.64   | 98  | 2   |
| 09GF-108 02  | 419 | 538  | 0.78 | 0.104  | 3.30   | 0.016  | 1.53   | 100 | 2   |
| 09GF-108 03  | 209 | 328  | 0.64 | 0.101  | 4.13   | 0.015  | 1.56   | 98  | 2   |
| 09GF-108 04  | 399 | 363  | 1.10 | 0.104  | 3.67   | 0.016  | 1.52   | 101 | 2   |
| 09GF-108 05  | 219 | 291  | 0.75 | 0.100  | 4.21   | 0.015  | 1.57   | 99  | 2   |
| 09GF-108 06  | 253 | 230  | 1.10 | 0.105  | 5.53   | 0.015  | 1.79   | 99  | 2   |
| 09GF-108 07  | 211 | 289  | 0.73 | 0.099  | 4.44   | 0.015  | 1.57   | 99  | 2   |
| 09GF-108 08  | 305 | 278  | 1.10 | 0.101  | 4.18   | 0.016  | 1.57   | 99  | 2   |
| 09GF-108 09  | 370 | 470  | 0.79 | 0.103  | 3.11   | 0.016  | 1.54   | 99  | 2   |
| 09GF-108 10  | 228 | 240  | 0.95 | 0.104  | 5.45   | 0.016  | 1.67   | 99  | 2   |
| 09GF-108 11  | 661 | 396  | 1.67 | 0.101  | 3.71   | 0.016  | 1.54   | 100 | 2   |
| 09GF-108 12  | 322 | 288  | 1.12 | 0.101  | 4.44   | 0.015  | 1.57   | 99  | 2   |
| 09GF-108 13  | 150 | 181  | 0.83 | 0.106  | 7.37   | 0.015  | 1.81   | 99  | 2   |
| 09GF-108 14  | 170 | 170  | 1.00 | 0.106  | 7.04   | 0.016  | 1.62   | 100 | 2   |
|              |     |      |      |        |        |        |        |     |     |
| 09GF113A 02  | 111 | 114  | 0.97 | 0.0954 | 0.0244 | 0.0150 | 0.0019 | 96  | 12  |
| 09GF113A 03  | 167 | 148  | 1.13 | 0.1182 | 0.0294 | 0.0165 | 0.0017 | 106 | 11  |
| 09GF113A 04  | 287 | 243  | 1.18 | 0.1581 | 0.0360 | 0.0148 | 0.0008 | 95  | 5   |
| 09GF113A 05  | 108 | 105  | 1.04 | 0.1226 | 0.0346 | 0.0156 | 0.0009 | 100 | 6   |
| 09GF113A 06  | 324 | 189  | 1.71 | 0.2930 | 0.0754 | 0.0166 | 0.0012 | 106 | 8   |
| 09GF113A 08  | 161 | 173  | 0.93 | 0.1170 | 0.0908 | 0.0140 | 0.0017 | 90  | 11  |
| 09GF113A 09  | 120 | 101  | 1.19 | 0.0936 | 0.0291 | 0.0147 | 0.0010 | 94  | 6   |
| 09GF113A 10  | 572 | 297  | 1.93 | 0.1014 | 0.0359 | 0.0149 | 0.0010 | 95  | 6   |
| 09GF113A 12  | 222 | 236  | 0.94 | 0.1309 | 0.0370 | 0.0131 | 0.0008 | 84  | 5   |
| 09GF113A 13  | 486 | 346  | 1.40 | 0.1136 | 0.0459 | 0.0141 | 0.0012 | 90  | 7   |
| 09GF113A 14  | 116 | 114  | 1.02 | 0.0921 | 0.0446 | 0.0129 | 0.0011 | 83  | 7   |
| 09GF113A 15  | 437 | 369  | 1.18 | 0.1406 | 0.0212 | 0.0154 | 0.0005 | 99  | 3   |
| 09GF113A 16  | 335 | 277  | 1.21 | 0.1660 | 0.0334 | 0.0155 | 0.0006 | 99  | 4   |
| 09GF113A 17  | 252 | 336  | 0.75 | 0.1247 | 0.0237 | 0.0149 | 0.0007 | 96  | 4   |
| 09GF113A 18  | 206 | 171  | 1.21 | 0.0916 | 0.0191 | 0.0144 | 0.0010 | 92  | 6   |
| 09GF113A 19  | 70  | 66   | 1.05 | 0.1353 | 0.0215 | 0.0163 | 0.0008 | 104 | 5   |
| 09GF113A 21  | 142 | 96   | 1.49 | 0.0911 | 0.0337 | 0.0144 | 0.0013 | 92  | 8   |
| 09GF113A 22  | 262 | 286  | 0.92 | 0.1348 | 0.0278 | 0.0142 | 0.0006 | 91  | 4   |
| 09GF113A 24  | 81  | 81   | 1.00 | 0.1405 | 0.0231 | 0.0158 | 0.0011 | 101 | 7   |
| 09GF113A 25  | 203 | 143  | 1.42 | 0.1009 | 0.0104 | 0.0159 | 0.0005 | 102 | 3   |
| 09GF113A 26  | 105 | 97   | 1.09 | 0.0968 | 0.0365 | 0.0152 | 0.0013 | 98  | 8   |
| 09GF113A 27  | 112 | 114  | 0.99 | 0.0965 | 0.0193 | 0.0152 | 0.0007 | 97  | 4   |
| 09GF113A 28  | 550 | 1050 | 0.52 | 0.1140 | 0.0052 | 0.0156 | 0.0002 | 100 | 2   |
| 09GF113A 29  | 105 | 94   | 1.12 | 0.4652 | 0.3673 | 0.0221 | 0.0033 | 141 | 21  |
| 09GF113A 30  | 320 | 192  | 1.67 | 0.1463 | 0.0462 | 0.0159 | 0.0011 | 101 | 7   |
| 09GF113A 31  | 61  | 58   | 1.05 | 0.1097 | 0.0294 | 0.0158 | 0.0013 | 101 | 8   |
| 09GF113A 32  | 287 | 220  | 1.31 | 0.1460 | 0.0519 | 0.0128 | 0.0010 | 82  | 6   |
| 09GF113A 33  | 69  | 61   | 1.12 | 0.0937 | 0.0263 | 0.0148 | 0.0009 | 94  | 6   |
| 09GF113A 34  | 177 | 164  | 1.08 | 0.1192 | 0.0363 | 0.0135 | 0.0008 | 87  | 5   |
| 09GF113A 35  | 111 | 107  | 1.04 | 1.5000 | 0.6437 | 0.0241 | 0.0059 | 153 | 37  |
| 09GF113A 37  | 87  | 77   | 1.13 | 0.0983 | 0.0490 | 0.0155 | 0.0012 | 99  | 8   |
| 09GF113A 38  | 492 | 324  | 1.52 | 0.2467 | 0.0735 | 0.0158 | 0.0013 | 101 | 8   |
| 09GF113A 39  | 876 | 727  | 1.21 | 0.0933 | 0.0258 | 0.0142 | 0.0007 | 91  | 4   |
| 09GF113A 40  | 115 | 109  | 1.06 | 0.1063 | 0.0333 | 0.0148 | 0.0009 | 95  | 6   |



|             |      |      |      |        |        |        |        |     |   |
|-------------|------|------|------|--------|--------|--------|--------|-----|---|
| 09GF115A 03 | 1573 | 3714 | 0.42 | 0.0018 | 0.0199 | 0.0002 | 0.0063 | 127 | 2 |
| 09GF115A 04 | 966  | 867  | 1.11 | 0.0032 | 0.0179 | 0.0003 | 0.0052 | 115 | 2 |
| 09GF115A 05 | 306  | 368  | 0.83 | 0.0079 | 0.0213 | 0.0005 | 0.0068 | 136 | 3 |
| 09GF115A 07 | 229  | 205  | 1.12 | 0.0142 | 0.0201 | 0.0008 | 0.0065 | 128 | 5 |
| 09GF115A 08 | 1252 | 2824 | 0.44 | 0.0057 | 0.0195 | 0.0003 | 0.0062 | 125 | 2 |
| 09GF115A 09 | 127  | 176  | 0.72 | 0.0192 | 0.0213 | 0.0009 | 0.0067 | 136 | 6 |
| 09GF115A 10 | 183  | 199  | 0.92 | 0.0105 | 0.0215 | 0.0006 | 0.0065 | 137 | 4 |
| 09GF115A 11 | 325  | 321  | 1.01 | 0.0086 | 0.0206 | 0.0005 | 0.0066 | 131 | 3 |
| 09GF115A 12 | 145  | 209  | 0.69 | 0.0178 | 0.0160 | 0.0010 | 0.0054 | 102 | 6 |
| 09GF115A 13 | 826  | 1745 | 0.47 | 0.0026 | 0.0196 | 0.0003 | 0.0064 | 125 | 2 |
| 09GF115A 14 | 137  | 207  | 0.66 | 0.0185 | 0.0154 | 0.0006 | 0.0048 | 98  | 4 |
| 09GF115A 15 | 148  | 203  | 0.73 | 0.0491 | 0.0145 | 0.0011 | 0.0042 | 93  | 7 |
| 09GF115A 16 | 107  | 405  | 0.26 | 0.0136 | 0.0209 | 0.0006 | 0.0066 | 133 | 4 |
| 09GF115A 17 | 845  | 1188 | 0.71 | 0.0052 | 0.0197 | 0.0004 | 0.0058 | 126 | 3 |
| 09GF115A 18 | 619  | 647  | 0.96 | 0.0056 | 0.0149 | 0.0003 | 0.0048 | 95  | 2 |
| 09GF115A 19 | 262  | 290  | 0.90 | 0.0391 | 0.0163 | 0.0011 | 0.0051 | 104 | 7 |
| 09GF115A 21 | 659  | 1544 | 0.43 | 0.0049 | 0.0178 | 0.0003 | 0.0056 | 114 | 2 |
| 09GF115A 22 | 419  | 472  | 0.89 | 0.0174 | 0.0187 | 0.0005 | 0.0057 | 119 | 3 |
| 09GF115A 23 | 358  | 166  | 2.16 | 0.0284 | 0.0194 | 0.0006 | 0.0060 | 124 | 4 |
| 09GF115A 24 | 298  | 563  | 0.53 | 0.0061 | 0.0213 | 0.0003 | 0.0068 | 136 | 2 |
| 09GF115A 25 | 2506 | 2058 | 1.22 | 0.0028 | 0.0188 | 0.0003 | 0.0053 | 120 | 2 |
| 09GF115A 26 | 674  | 1516 | 0.44 | 0.0028 | 0.0209 | 0.0003 | 0.0067 | 133 | 2 |

|             |     |     |      |        |        |        |        |     |   |
|-------------|-----|-----|------|--------|--------|--------|--------|-----|---|
| 09GF118A 01 | 132 | 204 | 0.66 | 0.0923 | 0.0410 | 0.0145 | 0.0013 | 93  | 8 |
| 09GF118A 02 | 299 | 308 | 0.97 | 0.0966 | 0.0058 | 0.0152 | 0.0004 | 97  | 2 |
| 09GF118A 03 | 355 | 369 | 0.96 | 0.1132 | 0.0101 | 0.0151 | 0.0006 | 96  | 4 |
| 09GF118A 04 | 458 | 392 | 1.17 | 0.1059 | 0.0070 | 0.0154 | 0.0004 | 99  | 3 |
| 09GF118A 05 | 381 | 521 | 0.73 | 0.1158 | 0.0135 | 0.0148 | 0.0008 | 95  | 5 |
| 09GF118A 06 | 323 | 432 | 0.75 | 0.1043 | 0.0121 | 0.0147 | 0.0004 | 94  | 3 |
| 09GF118A 07 | 309 | 378 | 0.82 | 0.0985 | 0.0087 | 0.0149 | 0.0006 | 95  | 3 |
| 09GF118A 08 | 231 | 315 | 0.73 | 0.1146 | 0.0152 | 0.0156 | 0.0005 | 100 | 3 |
| 09GF118A 09 | 239 | 366 | 0.65 | 0.0985 | 0.0068 | 0.0150 | 0.0004 | 96  | 3 |
| 09GF118A 10 | 267 | 387 | 0.69 | 0.1090 | 0.0133 | 0.0151 | 0.0008 | 97  | 5 |
| 09GF118A 11 | 285 | 360 | 0.79 | 0.1134 | 0.0056 | 0.0164 | 0.0004 | 105 | 2 |
| 09GF118A 12 | 225 | 375 | 0.60 | 0.1134 | 0.0082 | 0.0170 | 0.0005 | 109 | 3 |
| 09GF118A 13 | 184 | 262 | 0.70 | 0.1057 | 0.0107 | 0.0153 | 0.0006 | 98  | 4 |
| 09GF118A 14 | 306 | 339 | 0.90 | 0.1013 | 0.0053 | 0.0153 | 0.0003 | 98  | 2 |
| 09GF118A 15 | 376 | 512 | 0.73 | 0.1007 | 0.0044 | 0.0150 | 0.0003 | 96  | 2 |
| 09GF118A 16 | 674 | 767 | 0.88 | 0.0994 | 0.0031 | 0.0149 | 0.0002 | 95  | 2 |
| 09GF118A 17 | 271 | 409 | 0.66 | 0.1187 | 0.0052 | 0.0149 | 0.0003 | 95  | 2 |
| 09GF118A 18 | 251 | 371 | 0.68 | 0.1031 | 0.0059 | 0.0155 | 0.0004 | 99  | 2 |
| 09GF118A 19 | 225 | 315 | 0.71 | 0.1043 | 0.0061 | 0.0155 | 0.0004 | 99  | 2 |
| 09GF118A 20 | 243 | 399 | 0.61 | 0.0967 | 0.0086 | 0.0147 | 0.0004 | 94  | 2 |
| 09GF118A 21 | 228 | 282 | 0.81 | 0.0935 | 0.0094 | 0.0141 | 0.0006 | 90  | 4 |
| 09GF118A 22 | 339 | 465 | 0.73 | 0.0949 | 0.0049 | 0.0151 | 0.0003 | 96  | 2 |
| 09GF118A 23 | 399 | 549 | 0.73 | 0.0959 | 0.0036 | 0.0152 | 0.0003 | 97  | 2 |
| 09GF118A 24 | 382 | 442 | 0.86 | 0.0990 | 0.0041 | 0.0150 | 0.0003 | 96  | 2 |

|             |     |     |      |       |      |       |      |     |   |
|-------------|-----|-----|------|-------|------|-------|------|-----|---|
| 09GF-126 01 | 160 | 273 | 0.58 | 0.148 | 6.37 | 0.022 | 1.56 | 139 | 2 |
| 09GF-126 02 | 427 | 435 | 0.98 | 0.151 | 4.22 | 0.022 | 1.74 | 143 | 2 |
| 09GF-126 03 | 99  | 184 | 0.54 | 0.151 | 5.15 | 0.022 | 1.55 | 141 | 2 |
| 09GF-126 04 | 185 | 312 | 0.59 | 0.144 | 4.89 | 0.022 | 1.54 | 140 | 2 |
| 09GF-126 05 | 230 | 378 | 0.61 | 0.143 | 3.86 | 0.022 | 1.54 | 141 | 2 |
| 09GF-126 06 | 298 | 245 | 1.22 | 0.152 | 3.90 | 0.023 | 1.91 | 145 | 3 |
| 09GF-126 07 | 422 | 379 | 1.11 | 0.150 | 2.93 | 0.022 | 1.53 | 140 | 2 |
| 09GF-126 08 | 159 | 263 | 0.61 | 0.149 | 4.45 | 0.022 | 1.50 | 140 | 2 |
| 09GF-126 09 | 501 | 455 | 1.10 | 0.145 | 3.42 | 0.021 | 1.61 | 136 | 2 |
| 09GF-126 10 | 433 | 417 | 1.04 | 0.153 | 2.84 | 0.023 | 1.59 | 144 | 2 |
| 09GF-126 11 | 98  | 152 | 0.64 | 0.139 | 7.12 | 0.022 | 1.61 | 138 | 2 |
| 09GF-126 12 | 131 | 133 | 0.99 | 0.153 | 6.21 | 0.022 | 1.76 | 141 | 2 |
| 09GF-126 13 | 282 | 297 | 0.95 | 0.142 | 4.58 | 0.022 | 1.64 | 141 | 2 |
| 09GF-126 14 | 248 | 366 | 0.68 | 0.149 | 3.41 | 0.022 | 1.55 | 141 | 2 |
| 09GF-126 15 | 404 | 385 | 1.05 | 0.144 | 5.55 | 0.022 | 1.94 | 141 | 3 |

N14, Yongtai (Guo et al., 2012)

|            |     |     |      |        |        |        |        |    |    |
|------------|-----|-----|------|--------|--------|--------|--------|----|----|
| 09GF55A 01 | 20  | 44  | 1.80 | 0.0886 | 0.0790 | 0.0152 | 0.0019 | 97 | 12 |
| 09GF55A 02 | 75  | 92  | 0.82 | 0.0960 | 0.0134 | 0.0142 | 0.0007 | 91 | 4  |
| 09GF55A 03 | 30  | 47  | 1.71 | 0.2476 | 0.0567 | 0.0161 | 0.0016 | 95 | 11 |
| 09GF55A 05 | 166 | 80  | 2.08 | 0.2318 | 0.0162 | 0.0157 | 0.0006 | 94 | 4  |
| 09GF55A 07 | 476 | 235 | 2.03 | 0.1127 | 0.0067 | 0.0149 | 0.0004 | 95 | 3  |
| 09GF55A 08 | 103 | 157 | 0.66 | 0.1089 | 0.0114 | 0.0142 | 0.0006 | 91 | 4  |
| 09GF55A 09 | 185 | 71  | 2.61 | 0.6864 | 0.0278 | 0.0188 | 0.0007 | 88 | 5  |
| 09GF55A 10 | 91  | 163 | 0.56 | 0.0960 | 0.0077 | 0.0146 | 0.0004 | 94 | 3  |
| 09GF55A 11 | 39  | 47  | 2.27 | 0.0916 | 0.0507 | 0.0137 | 0.0015 | 88 | 10 |
| 09GF55A 12 | 149 | 181 | 0.82 | 0.1288 | 0.0095 | 0.0145 | 0.0005 | 91 | 3  |
| 09GF55A 14 | 183 | 211 | 0.87 | 0.1023 | 0.0063 | 0.0136 | 0.0004 | 87 | 2  |
| 09GF55A 15 | 88  | 88  | 1.00 | 0.1386 | 0.0212 | 0.0148 | 0.0010 | 92 | 6  |
| 09GF55A 16 | 64  | 118 | 0.54 | 0.1668 | 0.0092 | 0.0151 | 0.0005 | 93 | 3  |



|            |     |     |      |        |        |        |        |     |   |
|------------|-----|-----|------|--------|--------|--------|--------|-----|---|
| 09GF55A 17 | 192 | 137 | 1.40 | 0.0909 | 0.0097 | 0.0138 | 0.0006 | 88  | 3 |
| 09GF55A 19 | 505 | 308 | 1.64 | 0.1158 | 0.0051 | 0.0145 | 0.0003 | 93  | 2 |
| 09GF55A 20 | 64  | 47  | 1.37 | 0.1081 | 0.0228 | 0.0147 | 0.0008 | 94  | 5 |
| 09GF55A 21 | 238 | 290 | 0.82 | 0.4491 | 0.0111 | 0.0173 | 0.0004 | 92  | 3 |
| 09GF55A 22 | 112 | 182 | 0.62 | 0.1209 | 0.0126 | 0.0147 | 0.0007 | 94  | 5 |
| 09GF55A 23 | 342 | 218 | 1.57 | 0.1185 | 0.0092 | 0.0141 | 0.0005 | 89  | 3 |
| 09GF55A 24 | 132 | 207 | 0.64 | 0.1106 | 0.0086 | 0.0143 | 0.0005 | 92  | 3 |
| 09GF-70 01 | 492 | 231 | 2.13 | 0.1150 | 0.0053 | 0.0159 | 0.0004 | 101 | 2 |
| 09GF-70 02 | 772 | 593 | 1.30 | 0.1134 | 0.0082 | 0.0156 | 0.0003 | 99  | 2 |
| 09GF-70 03 | 329 | 357 | 0.92 | 0.1093 | 0.0079 | 0.0147 | 0.0003 | 94  | 2 |
| 09GF-70 04 | 311 | 279 | 1.11 | 0.1122 | 0.0123 | 0.0140 | 0.0004 | 89  | 2 |
| 09GF-70 05 | 304 | 364 | 0.83 | 0.0997 | 0.0060 | 0.0152 | 0.0003 | 97  | 2 |
| 09GF-70 06 | 123 | 86  | 1.43 | 0.1001 | 0.0160 | 0.0151 | 0.0005 | 96  | 3 |
| 09GF-70 07 | 502 | 280 | 1.79 | 0.1060 | 0.0065 | 0.0157 | 0.0005 | 100 | 3 |
| 09GF-70 08 | 301 | 302 | 1.00 | 0.1072 | 0.0038 | 0.0152 | 0.0003 | 97  | 2 |
| 09GF-70 09 | 168 | 142 | 1.19 | 0.1061 | 0.0064 | 0.0148 | 0.0004 | 95  | 3 |
| 09GF-70 10 | 247 | 208 | 1.19 | 0.0944 | 0.0042 | 0.0153 | 0.0003 | 98  | 2 |
| 09GF-70 11 | 175 | 194 | 0.91 | 0.0985 | 0.0044 | 0.0149 | 0.0003 | 95  | 2 |
| 09GF-70 12 | 369 | 263 | 1.40 | 0.1013 | 0.0046 | 0.0144 | 0.0003 | 92  | 2 |
| 09GF-70 13 | 195 | 201 | 0.97 | 0.1051 | 0.0055 | 0.0155 | 0.0004 | 99  | 2 |
| 09GF-70 14 | 532 | 272 | 1.95 | 0.1090 | 0.0060 | 0.0156 | 0.0004 | 100 | 2 |
| 09GF-70 15 | 933 | 694 | 1.35 | 0.1123 | 0.0095 | 0.0147 | 0.0003 | 94  | 2 |
| 09GF-70 16 | 257 | 153 | 1.69 | 0.1018 | 0.0058 | 0.0150 | 0.0004 | 96  | 2 |
| 09GF-70 17 | 317 | 364 | 0.87 | 0.1006 | 0.0030 | 0.0151 | 0.0003 | 96  | 2 |
| 09GF-70 18 | 536 | 343 | 1.56 | 0.1044 | 0.0037 | 0.0151 | 0.0003 | 97  | 2 |
| 09GF-70 19 | 269 | 234 | 1.15 | 0.0951 | 0.0050 | 0.0155 | 0.0004 | 99  | 2 |
| 09GF-70 20 | 268 | 286 | 0.94 | 0.1288 | 0.0114 | 0.0154 | 0.0004 | 98  | 2 |
| 09GF-70 21 | 831 | 547 | 1.52 | 0.0974 | 0.0041 | 0.0154 | 0.0003 | 99  | 2 |
| 09GF-70 22 | 264 | 133 | 1.98 | 0.1307 | 0.0072 | 0.0150 | 0.0004 | 96  | 3 |
| 09GF-70 23 | 218 | 184 | 1.19 | 0.1013 | 0.0055 | 0.0151 | 0.0004 | 96  | 2 |
| 09GF-70 24 | 145 | 164 | 0.88 | 0.1022 | 0.0078 | 0.0151 | 0.0005 | 96  | 3 |

N15, Fuqing (Liu et al., 2016)

|          |      |     |      |         |         |         |         |         |         |         |         |     |     |     |    |     |   |     |    |      |
|----------|------|-----|------|---------|---------|---------|---------|---------|---------|---------|---------|-----|-----|-----|----|-----|---|-----|----|------|
| NY18-01  | 218  | 217 | 1    | 0.04563 | 0.00466 | 0.10917 | 0.01112 | 0.01735 | 0.00032 | 0.00567 | 0.00073 | -22 | 205 | 105 | 10 | 111 | 2 | 114 | 15 | 1.06 |
| NY18-02  | 245  | 258 | 0.95 | 0.04766 | 0.00655 | 0.11568 | 0.01576 | 0.01760 | 0.00049 | 0.00372 | 0.00067 | 82  | 275 | 111 | 14 | 112 | 3 | 75  | 13 | 1.01 |
| NY18-03  | 250  | 262 | 0.95 | 0.04660 | 0.00422 | 0.11149 | 0.01006 | 0.01735 | 0.00032 | 0.00565 | 0.00086 | 29  | 200 | 107 | 9  | 111 | 2 | 114 | 17 | 1.04 |
| NY18-04  | 356  | 373 | 0.95 | 0.04892 | 0.00555 | 0.11684 | 0.01309 | 0.01733 | 0.00047 | 0.00432 | 0.00097 | 144 | 248 | 112 | 12 | 111 | 3 | 87  | 20 | 0.99 |
| NY18-05  | 691  | 680 | 1.02 | 0.04930 | 0.00197 | 0.11747 | 0.00477 | 0.01728 | 0.00028 | 0.00540 | 0.00085 | 162 | 94  | 113 | 4  | 110 | 2 | 109 | 17 | 0.97 |
| NY18-06  | 226  | 211 | 1.07 | 0.04889 | 0.00984 | 0.11858 | 0.02360 | 0.01759 | 0.00063 | 0.00692 | 0.00234 | 143 | 362 | 114 | 21 | 112 | 4 | 139 | 47 | 0.98 |
| NY18-07  | 246  | 335 | 0.74 | 0.04927 | 0.00491 | 0.11638 | 0.01148 | 0.01714 | 0.00040 | 0.00549 | 0.00126 | 161 | 223 | 112 | 10 | 110 | 3 | 111 | 25 | 0.98 |
| NY18-08  | 175  | 177 | 0.99 | 0.04822 | 0.00740 | 0.11715 | 0.01788 | 0.01762 | 0.00045 | 0.00524 | 0.00123 | 110 | 289 | 112 | 16 | 113 | 3 | 106 | 25 | 1.01 |
| NY18-09  | 242  | 200 | 1.21 | 0.04934 | 0.00985 | 0.11849 | 0.02334 | 0.01742 | 0.00064 | 0.00466 | 0.00196 | 164 | 363 | 114 | 21 | 111 | 4 | 94  | 39 | 0.97 |
| NY18-10  | 509  | 348 | 1.46 | 0.05064 | 0.00359 | 0.12082 | 0.00855 | 0.01730 | 0.00032 | 0.00642 | 0.00168 | 224 | 162 | 116 | 8  | 111 | 2 | 129 | 34 | 0.96 |
| NY18-11  | 245  | 236 | 1.04 | 0.04881 | 0.00492 | 0.11734 | 0.01175 | 0.01745 | 0.00035 | 0.00572 | 0.00096 | 139 | 225 | 113 | 11 | 112 | 2 | 115 | 19 | 0.99 |
| NY18-12  | 214  | 197 | 1.08 | 0.04850 | 0.00703 | 0.11660 | 0.01676 | 0.01746 | 0.00044 | 0.00541 | 0.00099 | 124 | 291 | 112 | 15 | 112 | 3 | 109 | 20 | 1.00 |
| NY18-13  | 239  | 260 | 0.92 | 0.04813 | 0.00511 | 0.11614 | 0.01226 | 0.01751 | 0.00038 | 0.00561 | 0.00101 | 106 | 234 | 112 | 11 | 112 | 2 | 113 | 20 | 1.00 |
| NY18-14  | 234  | 219 | 1.07 | 0.04834 | 0.00696 | 0.11653 | 0.01664 | 0.01749 | 0.00045 | 0.00511 | 0.00117 | 116 | 289 | 112 | 15 | 112 | 3 | 103 | 24 | 1.00 |
| NY18-15  | 202  | 232 | 0.87 | 0.04859 | 0.00523 | 0.11485 | 0.01226 | 0.01715 | 0.00036 | 0.00578 | 0.00117 | 128 | 238 | 110 | 11 | 110 | 2 | 116 | 24 | 1.00 |
| NY18-16  | 249  | 294 | 0.85 | 0.04842 | 0.00370 | 0.11640 | 0.00885 | 0.01744 | 0.00031 | 0.00616 | 0.00117 | 120 | 172 | 112 | 8  | 111 | 2 | 124 | 24 | 0.99 |
| NY18-17  | 210  | 160 | 1.31 | 0.04805 | 0.00735 | 0.11452 | 0.01739 | 0.01730 | 0.00042 | 0.00540 | 0.00123 | 102 | 288 | 110 | 16 | 111 | 3 | 109 | 25 | 1.01 |
| NY18-18  | 452  | 367 | 1.23 | 0.04839 | 0.00521 | 0.11727 | 0.01239 | 0.01760 | 0.00045 | 0.00609 | 0.00185 | 118 | 238 | 113 | 11 | 112 | 3 | 123 | 37 | 0.99 |
| NY18-19  | 182  | 185 | 0.98 | 0.04505 | 0.01063 | 0.10955 | 0.02554 | 0.01766 | 0.00069 | 0.00721 | 0.00302 | -17 | 372 | 106 | 23 | 113 | 4 | 145 | 61 | 1.07 |
| SMS04-01 | 1198 | 910 | 1.32 | 0.04662 | 0.00280 | 0.11186 | 0.00666 | 0.01740 | 0.00037 | 0.00466 | 0.00090 | 30  | 132 | 108 | 6  | 111 | 2 | 94  | 18 | 1.03 |
| SMS04-02 | 1640 | 768 | 2.14 | 0.04683 | 0.00196 | 0.11127 | 0.00478 | 0.01723 | 0.00031 | 0.00407 | 0.00045 | 41  | 91  | 107 | 4  | 110 | 2 | 82  | 9  | 1.03 |
| SMS04-03 | 303  | 293 | 1.03 | 0.05027 | 0.00426 | 0.12027 | 0.01020 | 0.01735 | 0.00035 | 0.00441 | 0.00055 | 207 | 193 | 115 | 9  | 111 | 2 | 89  | 11 | 0.97 |
| SMS04-04 | 649  | 518 | 1.25 | 0.05114 | 0.00413 | 0.12204 | 0.00972 | 0.01731 | 0.00040 | 0.00494 | 0.00123 | 247 | 185 | 117 | 9  | 111 | 3 | 100 | 25 | 0.95 |
| SMS04-05 | 554  | 448 | 1.24 | 0.05192 | 0.00310 | 0.12414 | 0.00744 | 0.01734 | 0.00033 | 0.00512 | 0.00082 | 282 | 139 | 119 | 7  | 111 | 2 | 103 | 16 | 0.93 |
| SMS04-06 | 302  | 322 | 0.94 | 0.05269 | 0.00934 | 0.12633 | 0.02202 | 0.01739 | 0.00067 | 0.00632 | 0.00284 | 315 | 362 | 121 | 20 | 111 | 4 | 127 | 57 | 0.92 |
| SMS04-07 | 456  | 520 | 0.88 | 0.04621 | 0.00357 | 0.10966 | 0.00840 | 0.01721 | 0.00036 | 0.00448 | 0.00106 | 9   | 172 | 106 | 8  | 110 | 2 | 90  | 21 | 1.04 |
| SMS04-08 | 491  | 516 | 0.95 | 0.04853 | 0.00302 | 0.11429 | 0.00712 | 0.01708 | 0.00033 | 0.00546 | 0.00121 | 125 | 140 | 110 | 6  | 109 | 2 | 110 | 24 | 0.99 |
| SMS04-09 | 702  | 594 | 1.18 | 0.04594 | 0.00447 | 0.10995 | 0.01054 | 0.01736 | 0.00046 | 0.00476 | 0.00145 | -5  | 204 | 106 | 10 | 111 | 3 | 96  | 29 | 1.05 |
| SMS04-10 | 246  | 291 | 0.84 | 0.04839 | 0.00561 | 0.11569 | 0.01329 | 0.01734 | 0.00042 | 0.00577 | 0.00182 | 118 | 245 | 111 | 12 | 111 | 3 | 116 | 37 | 1.00 |
| SMS04-11 | 1032 | 805 | 1.28 | 0.04850 | 0.00205 | 0.11548 | 0.00500 | 0.01727 | 0.00031 | 0.00521 | 0.00085 | 124 | 97  | 111 | 5  | 110 | 2 | 105 | 17 | 0.99 |
| SMS04-12 | 1045 | 541 | 1.93 | 0.04612 | 0.00319 | 0.11032 | 0.00764 | 0.01735 | 0.00034 | 0.00608 | 0.00138 | 4   | 153 | 106 | 7  | 111 | 2 | 123 | 28 | 1.05 |
| SMS04-13 | 122  | 156 | 0.78 | 0.04895 | 0.01216 | 0.15147 | 0.03726 | 0.02247 | 0.00092 | 0.00387 | 0.00103 | 145 | 434 | 143 | 33 | 143 | 6 | 78  | 21 | 1.00 |
| SMS04-14 | 218  | 237 | 0.92 | 0.04792 | 0.00990 | 0.11403 | 0.02331 | 0.01726 | 0.00062 | 0.00739 | 0.00355 | 95  | 365 | 110 | 21 | 110 | 4 | 149 | 71 | 1.00 |
| SMS04-15 | 478  | 498 | 0.96 | 0.04805 | 0.00564 | 0.11490 | 0.01330 | 0.01734 | 0.00048 | 0.00682 | 0.00336 | 102 | 245 | 110 | 12 | 111 | 3 | 137 | 67 | 1.01 |
| SMS04-16 | 567  | 747 | 0.76 | 0.04935 | 0.00253 | 0.11736 | 0.00607 | 0.01725 | 0.00032 | 0.00598 | 0.00156 | 164 | 118 | 113 | 6  | 110 | 2 | 121 | 31 | 0.97 |
| SMS04-17 | 415  | 442 | 0.94 | 0.05033 | 0.00462 | 0.12131 | 0.01103 | 0.01748 | 0.00041 | 0.00499 | 0.00163 | 210 | 209 | 116 | 10 | 112 | 3 | 101 | 33 | 0.97 |
| SMS04-18 | 769  | 591 | 1.3  | 0.04915 | 0.00454 | 0.11853 | 0.01082 | 0.01749 | 0.00044 | 0.00495 | 0.00154 | 155 | 209 | 114 | 10 | 112 | 3 | 100 | 31 | 0.98 |
| SMS04-19 | 176  | 175 | 1.01 | 0.04844 | 0.00732 | 0.13020 | 0.01959 | 0.01950 | 0.00048 | 0.00728 | 0.00223 | 121 | 292 | 124 | 18 | 124 | 3 | 147 | 45 | 1.00 |
| SMS04-20 | 453  | 426 | 1.06 | 0.04839 | 0.00329 | 0.11677 | 0.00799 | 0.01750 | 0.00033 | 0.00454 | 0.00099 | 118 | 153 | 112 | 7  | 112 | 2 | 92  | 20 | 1.00 |
| SMS06-01 | 328  | 350 | 0.94 | 0.04772 | 0.00432 | 0.11385 | 0.01031 | 0.01731 | 0.00035 | 0.00497 | 0.00085 | 85  | 201 | 109 | 9  | 111 | 2 | 100 | 17 | 1.02 |
| SMS06-02 | 489  | 500 | 0.98 | 0.04801 | 0.00467 | 0.12604 | 0.01217 | 0.01905 | 0.00047 | 0.00488 | 0.00119 | 100 | 216 | 121 | 11 | 122 | 3 | 98  | 24 | 1.01 |
| SMS06-03 | 193  | 168 | 1.15 | 0.04950 | 0.01520 | 0.13360 | 0.04066 | 0.01960 | 0.00091 | 0.00448 | 0.00140 | 172 | 522 | 127 | 36 | 125 | 6 | 90  | 28 | 0.98 |
| SMS06-04 | 610  | 294 | 2.08 | 0.05204 | 0.01208 | 0.12561 | 0.02878 | 0.01752 | 0.00076 | 0.00486 | 0.00176 | 287 | 428 | 120 | 26 | 112 | 5 | 98  | 35 | 0.93 |



|          |     |     |      |         |         |         |         |         |         |         |         |      |     |     |    |     |   |     |    |      |
|----------|-----|-----|------|---------|---------|---------|---------|---------|---------|---------|---------|------|-----|-----|----|-----|---|-----|----|------|
| SMS06-05 | 375 | 317 | 1.18 | 0.05046 | 0.00837 | 0.11909 | 0.01954 | 0.01712 | 0.00054 | 0.00494 | 0.00149 | 216  | 331 | 114 | 18 | 109 | 3 | 100 | 30 | 0.96 |
| SMS06-06 | 352 | 249 | 1.41 | 0.04926 | 0.00925 | 0.11592 | 0.02156 | 0.01707 | 0.00056 | 0.00457 | 0.00158 | 160  | 348 | 111 | 20 | 109 | 4 | 92  | 32 | 0.98 |
| SMS06-07 | 125 | 98  | 1.29 | 0.04865 | 0.01461 | 0.13227 | 0.03950 | 0.01972 | 0.00072 | 0.00517 | 0.00139 | 131  | 506 | 126 | 35 | 126 | 5 | 104 | 28 | 1.00 |
| SMS06-08 | 354 | 268 | 1.32 | 0.05115 | 0.01178 | 0.12263 | 0.02791 | 0.01739 | 0.00073 | 0.00493 | 0.00200 | 248  | 418 | 117 | 25 | 111 | 5 | 99  | 40 | 0.95 |
| SMS06-09 | 248 | 248 | 1    | 0.04744 | 0.00615 | 0.11352 | 0.01467 | 0.01736 | 0.00041 | 0.00518 | 0.00137 | 71   | 259 | 109 | 13 | 111 | 3 | 104 | 28 | 1.02 |
| SMS06-10 | 187 | 176 | 1.06 | 0.04869 | 0.00797 | 0.14489 | 0.02358 | 0.02159 | 0.00060 | 0.00662 | 0.00195 | 433  | 307 | 137 | 21 | 138 | 4 | 133 | 39 | 1.01 |
| SMS06-11 | 174 | 175 | 0.99 | 0.05147 | 0.01448 | 0.12148 | 0.03389 | 0.01712 | 0.00072 | 0.00605 | 0.00219 | 262  | 503 | 116 | 31 | 109 | 5 | 122 | 44 | 0.94 |
| SMS06-12 | 157 | 155 | 1.01 | 0.05086 | 0.01860 | 0.12044 | 0.04370 | 0.01718 | 0.00086 | 0.00421 | 0.00133 | 234  | 640 | 115 | 40 | 110 | 5 | 85  | 27 | 0.96 |
| SMS06-13 | 196 | 235 | 0.83 | 0.04927 | 0.01088 | 0.11854 | 0.02599 | 0.01745 | 0.00060 | 0.00618 | 0.00187 | 161  | 395 | 114 | 24 | 112 | 4 | 125 | 38 | 0.98 |
| SMS06-14 | 352 | 334 | 1.05 | 0.05020 | 0.01080 | 0.13034 | 0.02763 | 0.01885 | 0.00079 | 0.00755 | 0.00491 | 204  | 390 | 124 | 25 | 120 | 5 | 152 | 98 | 0.97 |
| SMS06-15 | 379 | 364 | 1.04 | 0.04971 | 0.00641 | 0.11849 | 0.01517 | 0.01729 | 0.00045 | 0.00463 | 0.00121 | 181  | 274 | 114 | 14 | 111 | 3 | 93  | 24 | 0.97 |
| SMS06-16 | 644 | 474 | 1.36 | 0.04690 | 0.00799 | 0.11398 | 0.01913 | 0.01762 | 0.00062 | 0.00311 | 0.00089 | 44   | 303 | 110 | 17 | 113 | 4 | 63  | 18 | 1.03 |
| SMS06-17 | 217 | 233 | 0.93 | 0.05017 | 0.00823 | 0.12081 | 0.01968 | 0.01747 | 0.00048 | 0.00513 | 0.00139 | 203  | 324 | 116 | 18 | 112 | 3 | 103 | 28 | 0.97 |
| SMS06-18 | 150 | 162 | 0.92 | 0.04955 | 0.01961 | 0.11834 | 0.04639 | 0.01733 | 0.00099 | 0.00434 | 0.00174 | 174  | 678 | 114 | 42 | 111 | 6 | 88  | 35 | 0.97 |
| SMS06-19 | 177 | 166 | 1.06 | 0.04769 | 0.01052 | 0.11618 | 0.02552 | 0.01767 | 0.00052 | 0.00493 | 0.00142 | 84   | 382 | 112 | 23 | 113 | 3 | 99  | 29 | 1.01 |
| SMS06-20 | 323 | 243 | 1.33 | 0.04514 | 0.01769 | 0.10973 | 0.04262 | 0.01763 | 0.00098 | 0.00367 | 0.00144 | -12  | 629 | 106 | 39 | 113 | 6 | 74  | 29 | 1.07 |
|          |     |     |      |         |         |         |         |         |         |         |         |      |     |     |    |     |   |     |    |      |
| SMS07-01 | 376 | 204 | 1.84 | 0.05045 | 0.00814 | 0.11497 | 0.01827 | 0.01654 | 0.00056 | 0.00332 | 0.00063 | 216  | 326 | 111 | 17 | 106 | 4 | 67  | 13 | 0.95 |
| SMS07-02 | 469 | 245 | 1.91 | 0.04725 | 0.00568 | 0.10808 | 0.01288 | 0.01659 | 0.00042 | 0.00375 | 0.00058 | 62   | 244 | 104 | 12 | 106 | 3 | 76  | 12 | 1.02 |
| SMS07-03 | 244 | 159 | 1.53 | 0.04850 | 0.00797 | 0.11095 | 0.01806 | 0.01659 | 0.00049 | 0.00365 | 0.00071 | 124  | 306 | 107 | 17 | 106 | 3 | 74  | 14 | 0.99 |
| SMS07-04 | 255 | 146 | 1.75 | 0.04823 | 0.01705 | 0.10822 | 0.03781 | 0.01629 | 0.00097 | 0.00376 | 0.00153 | 111  | 589 | 104 | 35 | 104 | 6 | 76  | 31 | 1.00 |
| SMS07-05 | 193 | 122 | 1.59 | 0.04878 | 0.01342 | 0.11099 | 0.03024 | 0.01651 | 0.00071 | 0.00407 | 0.00122 | 137  | 467 | 107 | 28 | 106 | 5 | 82  | 25 | 0.99 |
| SMS07-06 | 305 | 190 | 1.6  | 0.04827 | 0.01091 | 0.10986 | 0.02452 | 0.01651 | 0.00067 | 0.00418 | 0.00147 | 113  | 393 | 106 | 22 | 106 | 4 | 84  | 30 | 1.00 |
| SMS07-07 | 424 | 211 | 2.01 | 0.04829 | 0.00533 | 0.11087 | 0.01217 | 0.01665 | 0.00037 | 0.00423 | 0.00091 | 114  | 238 | 107 | 11 | 106 | 2 | 85  | 18 | 0.99 |
| SMS07-08 | 294 | 167 | 1.76 | 0.04699 | 0.00890 | 0.10843 | 0.02034 | 0.01674 | 0.00056 | 0.00426 | 0.00139 | 49   | 333 | 105 | 19 | 107 | 4 | 86  | 28 | 1.02 |
| SMS07-09 | 233 | 140 | 1.66 | 0.04754 | 0.00897 | 0.11043 | 0.02069 | 0.01685 | 0.00050 | 0.00482 | 0.00135 | 76   | 334 | 106 | 19 | 108 | 3 | 97  | 27 | 1.02 |
| SMS07-11 | 237 | 125 | 1.89 | 0.04694 | 0.01173 | 0.10855 | 0.02692 | 0.01678 | 0.00062 | 0.00536 | 0.00190 | 46   | 414 | 105 | 25 | 107 | 4 | 108 | 38 | 1.02 |
| SMS07-12 | 213 | 124 | 1.72 | 0.04769 | 0.00896 | 0.11090 | 0.02071 | 0.01687 | 0.00046 | 0.00548 | 0.00144 | 84   | 333 | 107 | 19 | 108 | 3 | 110 | 29 | 1.01 |
| SMS07-13 | 219 | 137 | 1.6  | 0.05156 | 0.00894 | 0.11734 | 0.02021 | 0.01651 | 0.00047 | 0.00589 | 0.00151 | 266  | 350 | 113 | 18 | 106 | 3 | 119 | 30 | 0.94 |
| SMS07-14 | 223 | 141 | 1.59 | 0.04639 | 0.01394 | 0.10567 | 0.03150 | 0.01652 | 0.00073 | 0.00595 | 0.00191 | 18   | 489 | 102 | 29 | 106 | 5 | 120 | 38 | 1.04 |
| SMS07-15 | 150 | 99  | 1.52 | 0.04772 | 0.01289 | 0.11103 | 0.02980 | 0.01687 | 0.00062 | 0.00537 | 0.00174 | 85   | 448 | 107 | 27 | 108 | 4 | 108 | 35 | 1.01 |
| SMS07-16 | 260 | 145 | 1.79 | 0.04760 | 0.00752 | 0.11045 | 0.01736 | 0.01683 | 0.00042 | 0.00477 | 0.00101 | 79   | 291 | 106 | 16 | 108 | 3 | 96  | 20 | 1.02 |
| SMS07-17 | 274 | 158 | 1.73 | 0.04733 | 0.00749 | 0.11058 | 0.01740 | 0.01694 | 0.00044 | 0.00526 | 0.00152 | 66   | 289 | 106 | 16 | 108 | 3 | 106 | 31 | 1.02 |
| SMS07-18 | 250 | 144 | 1.74 | 0.04978 | 0.00855 | 0.11353 | 0.01934 | 0.01654 | 0.00048 | 0.00582 | 0.00194 | 185  | 326 | 109 | 18 | 106 | 3 | 117 | 39 | 0.97 |
| SMS07-19 | 200 | 116 | 1.72 | 0.04703 | 0.00983 | 0.10945 | 0.02274 | 0.01688 | 0.00051 | 0.00595 | 0.00213 | 51   | 359 | 105 | 21 | 108 | 3 | 120 | 43 | 1.03 |
| SMS07-20 | 409 | 161 | 2.55 | 0.04057 | 0.00693 | 0.09178 | 0.01560 | 0.01641 | 0.00040 | 0.00557 | 0.00209 | -257 | 260 | 89  | 15 | 105 | 3 | 112 | 42 | 1.18 |
|          |     |     |      |         |         |         |         |         |         |         |         |      |     |     |    |     |   |     |    |      |
| SMS08-01 | 494 | 331 | 1.49 | 0.05021 | 0.00213 | 0.11381 | 0.00467 | 0.01655 | 0.00019 | 0.00432 | 0.00016 | 206  | 100 | 109 | 4  | 106 | 1 | 87  | 3  | 0.97 |
| SMS08-02 | 437 | 468 | 0.93 | 0.05107 | 0.00263 | 0.11542 | 0.00574 | 0.01658 | 0.00023 | 0.00415 | 0.00018 | 243  | 123 | 111 | 5  | 106 | 1 | 84  | 4  | 0.95 |
| SMS08-03 | 281 | 253 | 1.11 | 0.05474 | 0.00368 | 0.12408 | 0.00754 | 0.01696 | 0.00026 | 0.00438 | 0.00022 | 467  | 152 | 119 | 7  | 108 | 2 | 88  | 4  | 0.91 |
| SMS08-04 | 336 | 329 | 1.02 | 0.05755 | 0.00396 | 0.12924 | 0.00818 | 0.01665 | 0.00031 | 0.00421 | 0.00022 | 522  | 152 | 123 | 7  | 106 | 2 | 85  | 4  | 0.86 |
| SMS08-05 | 270 | 258 | 1.05 | 0.05291 | 0.00335 | 0.11881 | 0.00750 | 0.01672 | 0.00033 | 0.00427 | 0.00026 | 324  | 143 | 114 | 7  | 107 | 2 | 86  | 5  | 0.94 |
| SMS08-06 | 474 | 518 | 0.92 | 0.04850 | 0.00300 | 0.11190 | 0.00648 | 0.01688 | 0.00024 | 0.00457 | 0.00026 | 124  | 141 | 108 | 6  | 108 | 2 | 92  | 5  | 1.00 |
| SMS08-07 | 201 | 230 | 0.88 | 0.05351 | 0.00480 | 0.12515 | 0.01106 | 0.01702 | 0.00031 | 0.00450 | 0.00026 | 350  | 171 | 120 | 10 | 109 | 2 | 91  | 5  | 0.91 |
| SMS08-08 | 305 | 333 | 0.92 | 0.04992 | 0.00275 | 0.11391 | 0.00565 | 0.01681 | 0.00023 | 0.00459 | 0.00030 | 191  | 132 | 110 | 5  | 107 | 1 | 93  | 6  | 0.97 |
| SMS08-09 | 134 | 143 | 0.94 | 0.04982 | 0.00671 | 0.11259 | 0.01473 | 0.01674 | 0.00053 | 0.00502 | 0.00032 | 187  | 285 | 108 | 13 | 107 | 3 | 101 | 6  | 0.99 |
| SMS08-10 | 190 | 251 | 0.76 | 0.04902 | 0.00425 | 0.11313 | 0.00928 | 0.01694 | 0.00036 | 0.00449 | 0.00022 | 150  | 189 | 109 | 8  | 108 | 2 | 91  | 4  | 0.99 |
| SMS08-11 | 168 | 177 | 0.95 | 0.05688 | 0.00325 | 0.12661 | 0.00713 | 0.01672 | 0.00028 | 0.00437 | 0.00020 | 487  | 121 | 121 | 6  | 107 | 2 | 88  | 4  | 0.88 |
| SMS08-12 | 192 | 199 | 0.96 | 0.04961 | 0.00377 | 0.11462 | 0.00890 | 0.01667 | 0.00035 | 0.00401 | 0.00019 | 176  | 170 | 110 | 8  | 107 | 2 | 81  | 4  | 0.97 |
| SMS08-13 | 315 | 374 | 0.84 | 0.04900 | 0.00302 | 0.10967 | 0.00596 | 0.01674 | 0.00036 | 0.00418 | 0.00020 | 146  | 141 | 106 | 5  | 107 | 2 | 84  | 4  | 1.01 |
| SMS08-14 | 210 | 259 | 0.81 | 0.04912 | 0.00270 | 0.11041 | 0.00562 | 0.01676 | 0.00024 | 0.00395 | 0.00016 | 154  | 128 | 106 | 5  | 107 | 2 | 80  | 3  | 1.01 |
| SMS08-15 | 327 | 454 | 0.72 | 0.05071 | 0.00295 | 0.11841 | 0.00699 | 0.01694 | 0.00027 | 0.00407 | 0.00019 | 228  | 140 | 114 | 6  | 108 | 2 | 82  | 4  | 0.95 |
| SMS08-16 | 207 | 268 | 0.77 | 0.051.  |         |         |         |         |         |         |         |      |     |     |    |     |   |     |    |      |



N16, Dehua (Guo et al., 2012; Liu et al., 2016)

|             |     |     |      |       |      |       |      |     |   |
|-------------|-----|-----|------|-------|------|-------|------|-----|---|
| 08JH-460@1  | 103 | 252 | 0.41 | 0.144 | 2.49 | 0.021 | 1.51 | 133 | 2 |
| 08JH-460@2  | 508 | 757 | 0.67 | 0.133 | 6.04 | 0.021 | 1.51 | 134 | 2 |
| 08JH-460@3  | 145 | 157 | 0.92 | 0.144 | 4.48 | 0.021 | 1.55 | 133 | 2 |
| 08JH-460@4  | 116 | 255 | 0.45 | 0.137 | 2.51 | 0.021 | 1.50 | 132 | 2 |
| 08JH-460@5  | 154 | 252 | 0.61 | 0.138 | 3.03 | 0.021 | 1.54 | 132 | 2 |
| 08JH-460@6  | 231 | 378 | 0.61 | 0.139 | 2.54 | 0.021 | 1.50 | 134 | 2 |
| 08JH-460@7  | 148 | 211 | 0.70 | 0.136 | 4.04 | 0.021 | 1.51 | 134 | 2 |
| 08JH-460@8  | 260 | 230 | 1.13 | 0.138 | 2.92 | 0.021 | 1.52 | 132 | 2 |
| 08JH-460@9  | 46  | 113 | 0.41 | 0.142 | 3.33 | 0.021 | 1.55 | 133 | 2 |
| 08JH-460@10 | 129 | 253 | 0.51 | 0.133 | 3.20 | 0.021 | 1.54 | 132 | 2 |
| 08JH-460@11 | 542 | 423 | 1.28 | 0.142 | 2.23 | 0.021 | 1.60 | 135 | 2 |
| 08JH-460@12 | 428 | 649 | 0.66 | 0.146 | 4.50 | 0.021 | 1.53 | 133 | 2 |
| 08JH-460@13 | 100 | 104 | 0.96 | 0.128 | 4.57 | 0.021 | 1.55 | 132 | 2 |



|             |      |      |      |         |         |         |         |         |         |         |         |       |     |     |     |     |     |     |      |      |
|-------------|------|------|------|---------|---------|---------|---------|---------|---------|---------|---------|-------|-----|-----|-----|-----|-----|-----|------|------|
| 08JH-460@14 | 100  | 110  | 0.91 |         |         | 0.130   | 5.62    | 0.020   | 1.59    |         |         |       |     |     |     |     |     | 131 | 2    |      |
| 08JH-460@15 | 1665 | 2640 | 0.63 |         |         | 0.146   | 1.63    | 0.022   | 1.50    |         |         |       |     |     |     |     |     | 141 | 2    |      |
| 08JH-460@16 | 274  | 225  | 1.22 |         |         | 0.141   | 2.59    | 0.021   | 1.52    |         |         |       |     |     |     |     |     | 134 | 2    |      |
| 08JH-460@17 | 395  | 309  | 1.28 |         |         | 0.137   | 2.66    | 0.021   | 1.51    |         |         |       |     |     |     |     |     | 135 | 2    |      |
| 08JH-460@18 | 298  | 282  | 1.05 |         |         | 0.142   | 2.40    | 0.021   | 1.51    |         |         |       |     |     |     |     |     | 133 | 2    |      |
| 08JH-460@19 | 1025 | 1362 | 0.75 |         |         | 0.140   | 2.50    | 0.021   | 1.50    |         |         |       |     |     |     |     |     | 132 | 2    |      |
| 08JH-460@20 | 106  | 118  | 0.89 |         |         | 0.135   | 7.15    | 0.021   | 1.50    |         |         |       |     |     |     |     |     | 133 | 2    |      |
|             |      |      |      |         |         |         |         |         |         |         |         |       |     |     |     |     |     |     |      |      |
| NY23-01     | 221  | 276  | 0.8  | 0.05151 | 0.00226 | 0.15999 | 0.00710 | 0.02274 | 0.00027 | 0.00612 | 0.00027 | 265   | 97  | 151 | 6   | 145 | 2   | 123 | 5    | 0.96 |
| NY23-04     | 122  | 189  | 0.65 | 0.05455 | 0.00650 | 0.16680 | 0.01845 | 0.02277 | 0.00049 | 0.00640 | 0.00043 | 394   | 270 | 157 | 16  | 145 | 3   | 129 | 9    | 0.92 |
| NY23-05     | 159  | 254  | 0.63 | 0.04871 | 0.00220 | 0.15060 | 0.00662 | 0.02291 | 0.00030 | 0.00624 | 0.00030 | 200   | 101 | 142 | 6   | 146 | 2   | 126 | 6    | 1.03 |
| NY23-06     | 263  | 293  | 0.9  | 0.04913 | 0.00218 | 0.15271 | 0.00656 | 0.02289 | 0.00029 | 0.00636 | 0.00026 | 154   | 99  | 144 | 6   | 146 | 2   | 128 | 5    | 1.01 |
| NY23-07     | 260  | 334  | 0.78 | 0.05203 | 0.00256 | 0.16435 | 0.00824 | 0.02296 | 0.00031 | 0.00624 | 0.00026 | 287   | 113 | 155 | 7   | 146 | 2   | 126 | 5    | 0.94 |
| NY23-08     | 229  | 321  | 0.71 | 0.05255 | 0.00397 | 0.16498 | 0.01189 | 0.02295 | 0.00041 | 0.00694 | 0.00032 | 309   | 172 | 155 | 10  | 146 | 3   | 140 | 7    | 0.94 |
| NY23-09     | 290  | 259  | 1.12 | 0.04424 | 0.00259 | 0.13684 | 0.00792 | 0.02267 | 0.00027 | 0.00630 | 0.00023 |       | 130 | 7   | 145 | 2   | 127 | 5   | 1.12 |      |
| NY23-10     | 292  | 306  | 0.96 | 0.05325 | 0.00330 | 0.16659 | 0.01053 | 0.02274 | 0.00047 | 0.00628 | 0.00030 | 339   | 139 | 156 | 9   | 145 | 3   | 127 | 6    | 0.93 |
| NY23-11     | 250  | 346  | 0.72 | 0.05697 | 0.00288 | 0.17549 | 0.00894 | 0.02244 | 0.00029 | 0.00728 | 0.00029 | 500   | 111 | 164 | 8   | 143 | 2   | 147 | 6    | 0.87 |
| NY23-14     | 112  | 142  | 0.79 | 0.05457 | 0.00336 | 0.16935 | 0.00958 | 0.02282 | 0.00039 | 0.00616 | 0.00028 | 394   | 139 | 159 | 8   | 145 | 2   | 124 | 6    | 0.91 |
| NY23-15     | 182  | 209  | 0.87 | 0.05368 | 0.00253 | 0.16618 | 0.00798 | 0.02258 | 0.00030 | 0.00640 | 0.00029 | 367   | 103 | 156 | 7   | 144 | 2   | 129 | 6    | 0.92 |
| NY23-16     | 185  | 257  | 0.72 | 0.05242 | 0.00246 | 0.15895 | 0.00701 | 0.02259 | 0.00031 | 0.00639 | 0.00027 | 302   | 106 | 150 | 6   | 144 | 2   | 129 | 5    | 0.96 |
| NY23-17     | 288  | 414  | 0.7  | 0.05415 | 0.00226 | 0.16807 | 0.00677 | 0.02271 | 0.00022 | 0.00628 | 0.00023 | 376   | 99  | 158 | 6   | 145 | 1   | 126 | 5    | 0.92 |
| NY23-18     | 86   | 112  | 0.77 | 0.05235 | 0.00437 | 0.15666 | 0.01229 | 0.02248 | 0.00061 | 0.00647 | 0.00046 | 302   | 191 | 148 | 11  | 143 | 4   | 130 | 9    | 0.97 |
| NY23-19     | 319  | 275  | 1.16 | 0.05447 | 0.00237 | 0.16804 | 0.00694 | 0.02273 | 0.00025 | 0.00638 | 0.00021 | 391   | 94  | 158 | 6   | 145 | 2   | 128 | 4    | 0.92 |
| NY23-20     | 199  | 193  | 1.03 | 0.05529 | 0.00586 | 0.17198 | 0.01569 | 0.02297 | 0.00053 | 0.00581 | 0.00026 | 433   | 237 | 161 | 14  | 146 | 3   | 117 | 5    | 0.91 |
|             |      |      |      |         |         |         |         |         |         |         |         |       |     |     |     |     |     |     |      |      |
| NY25-01     | 112  | 170  | 0.66 | 0.04819 | 0.00747 | 0.14861 | 0.02133 | 0.02279 | 0.00062 | 0.00596 | 0.00054 | 109   | 330 | 141 | 19  | 145 | 4   | 120 | 11   | 1.03 |
| NY25-02     | 217  | 498  | 0.44 | 0.05318 | 0.00190 | 0.16411 | 0.00577 | 0.02305 | 0.00044 | 0.01416 | 0.00831 | 345   | 81  | 154 | 5   | 147 | 3   | 284 | 166  | 0.95 |
| NY25-03     | 182  | 226  | 0.81 | 0.05350 | 0.00245 | 0.16215 | 0.00696 | 0.02250 | 0.00025 | 0.00617 | 0.00023 | 350   | 104 | 153 | 6   | 143 | 2   | 124 | 5    | 0.93 |
| NY25-05     | 291  | 396  | 0.73 | 0.05222 | 0.00185 | 0.16129 | 0.00561 | 0.02262 | 0.00025 | 0.00599 | 0.00023 | 295   | 80  | 152 | 5   | 144 | 2   | 121 | 5    | 0.95 |
| NY25-06     | 194  | 303  | 0.64 | 0.04458 | 0.00194 | 0.13766 | 0.00604 | 0.02239 | 0.00024 | 0.00620 | 0.00024 | error | 131 | 5   | 143 | 2   | 125 | 5   | 1.09 |      |
| NY25-07     | 177  | 184  | 0.96 | 0.04876 | 0.00248 | 0.15126 | 0.00785 | 0.02295 | 0.00036 | 0.00642 | 0.00026 | 200   | 119 | 143 | 7   | 146 | 2   | 129 | 5    | 1.02 |
| NY25-08     | 157  | 200  | 0.79 | 0.05345 | 0.00660 | 0.16813 | 0.02355 | 0.02268 | 0.00035 | 0.00620 | 0.00026 | 346   | 281 | 158 | 20  | 145 | 2   | 125 | 5    | 0.92 |
| NY25-09     | 271  | 313  | 0.86 | 0.05473 | 0.00283 | 0.16857 | 0.00877 | 0.02227 | 0.00026 | 0.00621 | 0.00021 | 467   | 121 | 158 | 8   | 142 | 2   | 125 | 4    | 0.90 |
| NY25-10     | 298  | 262  | 1.14 | 0.05169 | 0.00254 | 0.15890 | 0.00728 | 0.02284 | 0.00027 | 0.00618 | 0.00023 | 272   | 118 | 150 | 6   | 146 | 2   | 124 | 5    | 0.97 |
| NY25-11     | 294  | 417  | 0.71 | 0.04800 | 0.00171 | 0.14890 | 0.00524 | 0.02256 | 0.00024 | 0.00619 | 0.00021 | 98    | 88  | 141 | 5   | 144 | 2   | 125 | 4    | 1.02 |
| NY25-13     | 283  | 472  | 0.6  | 0.05739 | 0.00323 | 0.17491 | 0.00884 | 0.02245 | 0.00029 | 0.00651 | 0.00029 | 506   | 129 | 164 | 8   | 143 | 2   | 131 | 6    | 0.87 |
| NY25-14     | 236  | 300  | 0.79 | 0.05248 | 0.00232 | 0.16010 | 0.00638 | 0.02261 | 0.00027 | 0.00631 | 0.00023 | 306   | 97  | 151 | 6   | 144 | 2   | 127 | 5    | 0.95 |
| NY25-15     | 186  | 186  | 1    | 0.05513 | 0.00444 | 0.16698 | 0.01241 | 0.02248 | 0.00058 | 0.00615 | 0.00027 | 417   | 177 | 157 | 11  | 143 | 4   | 124 | 5    | 0.91 |
| NY25-16     | 86   | 111  | 0.77 | 0.05595 | 0.00818 | 0.16719 | 0.02499 | 0.02204 | 0.00073 | 0.00615 | 0.00056 | 450   | 330 | 157 | 22  | 141 | 5   | 124 | 11   | 0.90 |
| NY25-17     | 473  | 492  | 0.96 | 0.05119 | 0.00233 | 0.16143 | 0.00735 | 0.02295 | 0.00028 | 0.00641 | 0.00024 | 250   | 104 | 152 | 6   | 146 | 2   | 129 | 5    | 0.96 |
| NY25-18     | 230  | 221  | 1.04 | 0.04886 | 0.00256 | 0.15017 | 0.00774 | 0.02258 | 0.00029 | 0.00635 | 0.00023 | 143   | 124 | 142 | 7   | 144 | 2   | 128 | 5    | 1.01 |
| NY25-19     | 207  | 275  | 0.75 | 0.05177 | 0.00271 | 0.15843 | 0.00792 | 0.02259 | 0.00028 | 0.00610 | 0.00022 | 276   | 120 | 149 | 7   | 144 | 2   | 123 | 4    | 0.97 |
| NY25-20     | 484  | 394  | 1.23 | 0.04921 | 0.00208 | 0.15017 | 0.00602 | 0.02240 | 0.00023 | 0.00629 | 0.00025 | 167   | 98  | 142 | 5   | 143 | 1   | 127 | 5    | 1.01 |
|             |      |      |      |         |         |         |         |         |         |         |         |       |     |     |     |     |     |     |      |      |
| NY26-01     | 282  | 317  | 0.89 | 0.05209 | 0.00269 | 0.16161 | 0.00838 | 0.02249 | 0.00032 | 0.00641 | 0.00024 | 300   | 151 | 152 | 7   | 143 | 2   | 129 | 5    | 0.94 |
| NY26-02     | 142  | 184  | 0.78 | 0.04992 | 0.00270 | 0.15380 | 0.00831 | 0.02258 | 0.00039 | 0.00639 | 0.00023 | 191   | 131 | 145 | 7   | 144 | 2   | 129 | 5    | 0.99 |
| NY26-03     | 167  | 239  | 0.7  | 0.05505 | 0.00240 | 0.16457 | 0.00685 | 0.02261 | 0.00065 | 0.00617 | 0.00022 | 413   | 94  | 155 | 6   | 144 | 4   | 124 | 4    | 0.93 |
| NY26-04     | 225  | 314  | 0.72 | 0.05248 | 0.00204 | 0.16176 | 0.00633 | 0.02251 | 0.00027 | 0.00640 | 0.00023 | 306   | 87  | 152 | 6   | 143 | 2   | 129 | 5    | 0.94 |
| NY26-05     | 251  | 263  | 0.95 | 0.04912 | 0.00221 | 0.14973 | 0.00660 | 0.02231 | 0.00024 | 0.00616 | 0.00024 | 154   | 99  | 142 | 6   | 142 | 1   | 124 | 5    | 1.00 |
| NY26-07     | 609  | 768  | 0.79 | 0.04842 | 0.00226 | 0.15294 | 0.00860 | 0.02258 | 0.00037 | 0.00677 | 0.00027 | 120   | 114 | 145 | 8   | 144 | 2   | 136 | 5    | 0.99 |
| NY26-09     | 259  | 323  | 0.8  | 0.04759 | 0.00201 | 0.14664 | 0.00603 | 0.02251 | 0.00025 | 0.00645 | 0.00024 | 80    | 96  | 139 | 5   | 144 | 2   | 130 | 5    | 1.04 |
| NY26-11     | 214  | 248  | 0.86 | 0.04887 | 0.00229 | 0.14919 | 0.00681 | 0.02242 | 0.00029 | 0.00651 | 0.00026 | 143   | 114 | 141 | 6   | 143 | 2   | 131 | 5    | 1.01 |
| NY26-13     | 447  | 561  | 0.8  | 0.05082 | 0.00187 | 0.15871 | 0.00582 | 0.02273 | 0.00025 | 0.00628 | 0.00022 | 232   | 88  | 150 | 5   | 145 | 2   | 127 | 4    | 0.97 |
| NY26-14     | 232  | 266  | 0.87 | 0.05076 | 0.00237 | 0.15466 | 0.00733 | 0.02212 | 0.00027 | 0.00593 | 0.00022 | 232   | 114 | 146 | 6   | 141 | 2   | 120 | 4    | 0.97 |
| NY26-15     | 212  | 285  | 0.74 | 0.05321 | 0.00216 | 0.16448 | 0.00648 | 0.02253 | 0.00026 | 0.00595 | 0.00024 | 339   | 93  | 155 | 6   | 144 | 2   | 120 | 5    | 0.93 |
| NY26-16     | 211  | 245  | 0.86 | 0.04802 | 0.00302 | 0.14816 | 0.00918 | 0.02256 | 0.00043 | 0.00580 | 0.00027 | 98    | 144 | 140 | 8   | 144 | 3   | 117 | 5    | 1.03 |
| NY26-17     | 127  | 154  | 0.83 | 0.05321 | 0.00404 | 0.16088 |         |         |         |         |         |       |     |     |     |     |     |     |      |      |



|         |      |     |      |         |         |         |         |         |         |         |         |     |     |     |    |     |   |     |    |      |
|---------|------|-----|------|---------|---------|---------|---------|---------|---------|---------|---------|-----|-----|-----|----|-----|---|-----|----|------|
| NY28-01 | 327  | 226 | 1.45 | 0.04693 | 0.00354 | 0.14428 | 0.01087 | 0.02229 | 0.00042 | 0.00444 | 0.00044 | 46  | 168 | 137 | 10 | 142 | 3 | 90  | 9  | 1.04 |
| NY28-02 | 1059 | 501 | 2.11 | 0.05050 | 0.00429 | 0.15360 | 0.01279 | 0.02206 | 0.00061 | 0.00168 | 0.00023 | 218 | 194 | 145 | 11 | 141 | 4 | 34  | 5  | 0.97 |
| NY28-03 | 444  | 225 | 1.98 | 0.04891 | 0.00379 | 0.14890 | 0.01150 | 0.02207 | 0.00043 | 0.00491 | 0.00060 | 144 | 175 | 141 | 10 | 141 | 3 | 99  | 12 | 1.00 |
| NY28-04 | 884  | 372 | 2.38 | 0.05183 | 0.00247 | 0.15768 | 0.00759 | 0.02206 | 0.00039 | 0.00430 | 0.00050 | 278 | 112 | 149 | 7  | 141 | 2 | 87  | 10 | 0.95 |
| NY28-05 | 715  | 502 | 1.42 | 0.04723 | 0.00211 | 0.14673 | 0.00661 | 0.02252 | 0.00039 | 0.00562 | 0.00087 | 61  | 98  | 139 | 6  | 144 | 2 | 113 | 17 | 1.04 |
| NY28-06 | 595  | 359 | 1.66 | 0.04745 | 0.00257 | 0.14573 | 0.00791 | 0.02227 | 0.00040 | 0.00555 | 0.00089 | 72  | 120 | 138 | 7  | 142 | 3 | 112 | 18 | 1.03 |
| NY28-07 | 807  | 436 | 1.85 | 0.04904 | 0.00505 | 0.15416 | 0.01557 | 0.02280 | 0.00069 | 0.00259 | 0.00063 | 150 | 231 | 146 | 14 | 145 | 4 | 52  | 13 | 0.99 |
| NY28-08 | 778  | 325 | 2.39 | 0.04545 | 0.00337 | 0.13791 | 0.01019 | 0.02201 | 0.00046 | 0.00520 | 0.00095 | -31 | 162 | 131 | 9  | 140 | 3 | 105 | 19 | 1.07 |
| NY28-09 | 485  | 328 | 1.48 | 0.05090 | 0.00283 | 0.15582 | 0.00866 | 0.02220 | 0.00041 | 0.00611 | 0.00113 | 236 | 129 | 147 | 8  | 142 | 3 | 123 | 23 | 0.97 |
| NY28-10 | 333  | 204 | 1.63 | 0.04541 | 0.00447 | 0.14334 | 0.01403 | 0.02289 | 0.00050 | 0.00597 | 0.00123 | -33 | 200 | 136 | 12 | 146 | 3 | 120 | 25 | 1.07 |
| NY28-11 | 278  | 178 | 1.56 | 0.05071 | 0.00621 | 0.15750 | 0.01913 | 0.02253 | 0.00059 | 0.00593 | 0.00107 | 228 | 273 | 149 | 17 | 144 | 4 | 120 | 21 | 0.97 |
| NY28-12 | 588  | 306 | 1.92 | 0.04700 | 0.00306 | 0.14282 | 0.00932 | 0.02204 | 0.00041 | 0.00628 | 0.00107 | 49  | 144 | 136 | 8  | 141 | 3 | 127 | 21 | 1.04 |
| NY28-13 | 1280 | 528 | 2.42 | 0.04661 | 0.00200 | 0.14379 | 0.00627 | 0.02237 | 0.00038 | 0.00637 | 0.00116 | 29  | 92  | 136 | 6  | 143 | 2 | 128 | 23 | 1.05 |
| NY28-14 | 532  | 272 | 1.96 | 0.05167 | 0.00493 | 0.15902 | 0.01500 | 0.02232 | 0.00056 | 0.00560 | 0.00123 | 271 | 218 | 150 | 13 | 142 | 4 | 113 | 25 | 0.95 |
| NY28-15 | 841  | 397 | 2.12 | 0.04847 | 0.00470 | 0.15279 | 0.01454 | 0.02287 | 0.00061 | 0.00829 | 0.00355 | 122 | 216 | 144 | 13 | 146 | 4 | 167 | 71 | 1.01 |
| NY28-16 | 370  | 233 | 1.58 | 0.05136 | 0.00414 | 0.15454 | 0.01242 | 0.02182 | 0.00045 | 0.00615 | 0.00131 | 257 | 184 | 146 | 11 | 139 | 3 | 124 | 26 | 0.95 |
| NY28-17 | 470  | 276 | 1.7  | 0.04948 | 0.00547 | 0.15146 | 0.01652 | 0.02220 | 0.00061 | 0.00460 | 0.00117 | 171 | 248 | 143 | 15 | 142 | 4 | 93  | 24 | 0.99 |
| NY28-18 | 1264 | 469 | 2.69 | 0.05011 | 0.00293 | 0.15497 | 0.00904 | 0.02243 | 0.00046 | 0.00587 | 0.00152 | 200 | 134 | 146 | 8  | 143 | 3 | 118 | 31 | 0.98 |
| NY28-19 | 394  | 240 | 1.64 | 0.04683 | 0.00831 | 0.14429 | 0.02519 | 0.02232 | 0.00085 | 0.00570 | 0.00236 | 41  | 313 | 137 | 22 | 142 | 5 | 115 | 47 | 1.04 |
| NY28-20 | 225  | 210 | 1.07 | 0.05092 | 0.00434 | 0.15695 | 0.01331 | 0.02236 | 0.00046 | 0.00689 | 0.00223 | 237 | 195 | 148 | 12 | 143 | 3 | 139 | 45 | 0.97 |

N17, Caixi (Guo et al., 2012; Liu et al., 2016)

|          |      |     |      |         |         |         |         |         |         |         |         |     |     |     |    |     |   |     |     |      |
|----------|------|-----|------|---------|---------|---------|---------|---------|---------|---------|---------|-----|-----|-----|----|-----|---|-----|-----|------|
| SMS12-01 | 565  | 233 | 2.42 | 0.04620 | 0.00481 | 0.11250 | 0.01170 | 0.01770 | 0.00040 | 0.00550 | 0.00130 | 10  | 214 | 108 | 11 | 113 | 2 | 111 | 26  | 1.05 |
| SMS12-02 | 571  | 215 | 2.66 | 0.04900 | 0.00527 | 0.11940 | 0.01280 | 0.01770 | 0.00040 | 0.00590 | 0.00150 | 147 | 241 | 115 | 12 | 113 | 2 | 120 | 30  | 0.98 |
| SMS12-03 | 391  | 135 | 2.9  | 0.04920 | 0.00825 | 0.11830 | 0.01970 | 0.01740 | 0.00040 | 0.00630 | 0.00170 | 157 | 315 | 114 | 18 | 111 | 3 | 127 | 34  | 0.97 |
| SMS12-04 | 620  | 228 | 2.72 | 0.04720 | 0.00509 | 0.11370 | 0.01220 | 0.01750 | 0.00040 | 0.00640 | 0.00180 | 60  | 227 | 109 | 11 | 112 | 2 | 129 | 36  | 1.03 |
| SMS12-05 | 1047 | 355 | 2.95 | 0.04570 | 0.00919 | 0.11030 | 0.02180 | 0.01750 | 0.00070 | 0.00920 | 0.00850 | -16 | 337 | 106 | 20 | 112 | 5 | 186 | 170 | 1.06 |
| SMS12-06 | 478  | 445 | 1.07 | 0.05505 | 0.00147 | 0.51786 | 0.01450 | 0.06822 | 0.00111 | 0.02302 | 0.00692 | 414 | 61  | 424 | 40 | 425 | 7 | 460 | 137 | 1.00 |
| SMS12-07 | 566  | 181 | 3.12 | 0.04780 | 0.00651 | 0.11430 | 0.01550 | 0.01730 | 0.00040 | 0.00560 | 0.00180 | 91  | 272 | 110 | 14 | 111 | 3 | 113 | 37  | 1.01 |
| SMS12-08 | 549  | 248 | 2.22 | 0.04740 | 0.00503 | 0.11560 | 0.01220 | 0.01770 | 0.00040 | 0.00550 | 0.00190 | 68  | 223 | 111 | 11 | 113 | 2 | 112 | 37  | 1.02 |
| SMS12-09 | 530  | 221 | 2.4  | 0.04670 | 0.00519 | 0.11170 | 0.01220 | 0.01730 | 0.00050 | 0.00460 | 0.00180 | 36  | 226 | 107 | 11 | 111 | 3 | 93  | 36  | 1.04 |
| SMS12-10 | 997  | 322 | 3.09 | 0.04950 | 0.00406 | 0.11700 | 0.00960 | 0.01720 | 0.00040 | 0.00540 | 0.00190 | 169 | 187 | 112 | 9  | 110 | 2 | 108 | 38  | 0.98 |
| SMS12-11 | 590  | 275 | 2.15 | 0.04700 | 0.00420 | 0.11450 | 0.01020 | 0.01770 | 0.00040 | 0.00640 | 0.00170 | 51  | 198 | 110 | 9  | 113 | 2 | 128 | 33  | 1.03 |
| SMS12-12 | 425  | 235 | 1.81 | 0.04730 | 0.00499 | 0.11510 | 0.01210 | 0.01760 | 0.00040 | 0.00600 | 0.00160 | 66  | 224 | 111 | 11 | 113 | 2 | 121 | 33  | 1.02 |
| SMS12-13 | 512  | 255 | 2    | 0.05090 | 0.00569 | 0.12320 | 0.01370 | 0.01760 | 0.00040 | 0.00650 | 0.00210 | 235 | 252 | 118 | 12 | 112 | 3 | 131 | 43  | 0.95 |
| SMS12-14 | 388  | 253 | 1.53 | 0.04640 | 0.00513 | 0.11110 | 0.01220 | 0.01740 | 0.00040 | 0.00670 | 0.00190 | 18  | 223 | 107 | 11 | 111 | 2 | 135 | 39  | 1.04 |
| SMS12-15 | 344  | 188 | 1.83 | 0.05210 | 0.00909 | 0.12320 | 0.02120 | 0.01710 | 0.00060 | 0.00540 | 0.00180 | 291 | 355 | 118 | 19 | 110 | 4 | 108 | 37  | 0.93 |
| SMS12-16 | 732  | 445 | 1.64 | 0.04760 | 0.00389 | 0.11580 | 0.00940 | 0.01760 | 0.00040 | 0.00730 | 0.00260 | 80  | 183 | 111 | 9  | 113 | 3 | 147 | 53  | 1.02 |
| SMS12-17 | 504  | 229 | 2.2  | 0.05000 | 0.00803 | 0.12120 | 0.01910 | 0.01760 | 0.00060 | 0.00630 | 0.00350 | 197 | 322 | 116 | 17 | 112 | 4 | 127 | 69  | 0.97 |
| SMS12-18 | 369  | 250 | 1.47 | 0.04720 | 0.00498 | 0.11580 | 0.01220 | 0.01780 | 0.00040 | 0.00660 | 0.00240 | 58  | 222 | 111 | 11 | 114 | 2 | 134 | 49  | 1.03 |
| SMS12-19 | 826  | 350 | 2.36 | 0.04710 | 0.00411 | 0.10980 | 0.00950 | 0.01690 | 0.00040 | 0.00620 | 0.00230 | 54  | 193 | 106 | 9  | 108 | 2 | 126 | 45  | 1.02 |
| SMS12-20 | 453  | 257 | 1.77 | 0.05080 | 0.00559 | 0.11920 | 0.01300 | 0.01700 | 0.00040 | 0.00530 | 0.00190 | 230 | 248 | 114 | 12 | 109 | 3 | 107 | 38  | 0.96 |

|          |      |     |      |         |         |         |         |         |         |         |         |     |     |    |    |    |   |     |    |      |
|----------|------|-----|------|---------|---------|---------|---------|---------|---------|---------|---------|-----|-----|----|----|----|---|-----|----|------|
| SMS14-01 | 1039 | 266 | 3.9  | 0.04700 | 0.00780 | 0.09570 | 0.01570 | 0.01480 | 0.00050 | 0.00280 | 0.00050 | 51  | 302 | 93 | 15 | 94 | 3 | 57  | 10 | 1.01 |
| SMS14-02 | 551  | 131 | 4.21 | 0.04740 | 0.01097 | 0.09390 | 0.02160 | 0.01440 | 0.00050 | 0.00520 | 0.00150 | 70  | 392 | 91 | 20 | 92 | 3 | 104 | 30 | 1.01 |
| SMS14-03 | 293  | 149 | 1.97 | 0.04950 | 0.01593 | 0.09870 | 0.03140 | 0.01450 | 0.00070 | 0.00440 | 0.00130 | 173 | 550 | 96 | 29 | 92 | 4 | 89  | 27 | 0.96 |
| SMS14-04 | 930  | 415 | 2.24 | 0.05010 | 0.00538 | 0.09770 | 0.01040 | 0.01420 | 0.00040 | 0.00620 | 0.00360 | 199 | 241 | 95 | 10 | 91 | 2 | 125 | 72 | 0.96 |
| SMS14-05 | 716  | 211 | 3.4  | 0.04630 | 0.01839 | 0.09220 | 0.02630 | 0.01450 | 0.00090 | 0.00130 | 0.00030 | 12  | 654 | 90 | 34 | 92 | 6 | 27  | 6  | 1.02 |
| SMS14-06 | 1969 | 619 | 3.18 | 0.04570 | 0.00273 | 0.09340 | 0.00560 | 0.01480 | 0.00030 | 0.00540 | 0.00160 | -20 | 130 | 91 | 5  | 95 | 2 | 109 | 32 | 1.04 |
| SMS14-07 | 3519 | 745 | 4.73 | 0.04520 | 0.00339 | 0.08960 | 0.00670 | 0.01440 | 0.00030 | 0.00320 | 0.00070 | -8  | 164 | 87 | 6  | 92 | 2 | 64  | 15 | 1.06 |
| SMS14-08 | 500  | 210 | 2.38 | 0.04650 | 0.00939 | 0.09430 | 0.01880 | 0.01470 | 0.00050 | 0.00400 | 0.00140 | 26  | 346 | 92 | 17 | 94 | 3 | 81  | 27 | 1.02 |
| SMS14-09 | 651  | 228 | 2.85 | 0.05040 | 0.00941 | 0.10190 | 0.01880 | 0.01470 | 0.00050 | 0.00130 | 0.00020 | 214 | 349 | 99 | 17 | 94 | 3 | 25  | 4  | 0.95 |
| SMS14-10 | 1311 | 519 | 2.53 | 0.04690 | 0.00638 | 0.08980 | 0.01200 | 0.01390 | 0.00040 | 0.00180 | 0.00040 | 42  | 259 | 87 | 11 | 89 | 3 | 36  | 9  | 1.02 |
| SMS14-11 | 469  | 132 | 3.56 | 0.04770 | 0.01127 | 0.09460 | 0.02220 | 0.01440 | 0.00050 | 0.00550 | 0.00260 | 83  | 401 | 92 | 21 | 92 | 3 | 111 | 51 | 1.00 |
| SMS14-12 | 433  | 160 | 2.7  | 0.05020 | 0.00896 | 0.09990 | 0.01770 | 0.01440 | 0.00040 | 0.00630 | 0.00330 | 206 | 338 | 97 | 16 | 92 | 2 | 127 | 66 | 0.95 |
| SMS14-13 | 1028 | 262 | 3.93 | 0.04620 | 0.00364 | 0.09350 | 0.00730 | 0.01470 | 0.00030 | 0.00430 | 0.00120 | 8   | 176 | 91 | 7  | 94 | 2 | 87  | 25 | 1.03 |

|                       |                |                 |                 |      |  |                   |                   |                   |                   |  |  |  |  |  |  |                |   |
|-----------------------|----------------|-----------------|-----------------|------|--|-------------------|-------------------|-------------------|-------------------|--|--|--|--|--|--|----------------|---|
| 08JH427 01            | 1633           | 2337            | 0.70            |      |  | 0.1613            | 0.0041            | 0.0214            | 0.0003            |  |  |  |  |  |  | 137            | 2 |
| 08JH427 02            | 808            | 1614            | 0.50            |      |  | 0.1496            | 0.0028            | 0.0215            | 0.0003            |  |  |  |  |  |  | 137            | 2 |
| 08JH427 03            |                | 1047            | 1165            | 0.90 |  | 0.1681            | 0.0101            | 0.0215            | 0.0007            |  |  |  |  |  |  | 137            | 4 |
| 08JH427 04            | 385            |                 | 732             | 0.53 |  | 0.1477            | 0.0148            | 0.0205            | 0.0006            |  |  |  |  |  |  | 131            | 3 |
| 08JH427 05            | 553            | 924             | 0.60            |      |  | 0.1528            | 0.0053            | 0.0217            | 0.0004            |  |  |  |  |  |  | 138            | 3 |
| 08JH427 06            | 355            | 509             | 0.70            |      |  | 0.1466            | 0.0155            | 0.0205            | 0.0006            |  |  |  |  |  |  | 131            | 4 |
| 08JH427 07            | 1231           | 1574            | 0.78            |      |  | 0.1584            | 0.0035            | 0.0216            | 0.0003            |  |  |  |  |  |  | 138            | 2 |
| 08JH427 08            | 657            | 1019            | 0.64            |      |  | 0.1683            | 0.0126            | 0.0205            | 0.0005            |  |  |  |  |  |  | 131            | 3 |
| 08JH427 09            | 383            | 575             | 0.67            |      |  | 0.1570            | 0.0081            | 0.0211            | 0.0006            |  |  |  |  |  |  | 135            | 3 |
| 08JH427 10            | 409            | 703             | 0.58            |      |  | 0.1558            | 0.0065            | 0.0215            | 0.0005            |  |  |  |  |  |  | 137            | 3 |
| <del>08JH427 11</del> | <del>828</del> | <del>1147</del> | <del>0.72</del> |      |  | <del>0.1862</del> | <del>0.0055</del> | <del>0.0263</del> | <del>0.0004</del> |  |  |  |  |  |  | <del>167</del> | 3 |
| 08JH427 12            | 685            | 961             | 0.71            |      |  | 0.1848            | 0.0055            | 0.0210            | 0.0004            |  |  |  |  |  |  | 134            | 2 |
| 08JH427 13            | 491            | 570             | 0.86            |      |  | 0.1905            | 0.0196            | 0.0202            | 0.0006            |  |  |  |  |  |  | 129            | 4 |
| 08JH427 14            | 1007           | 856             | 1.18            |      |  | 0.1915            | 0.0083            | 0.0210            | 0.0005            |  |  |  |  |  |  | 134            | 3 |
| 08JH427 15            | 524            | 697             | 0.75            |      |  | 0.2083            | 0.0111            | 0.0210            | 0.0007            |  |  |  |  |  |  | 134            | 4 |
| 08JH427 16            | 352            | 638             | 0.55            |      |  | 0.1472            | 0.0054            | 0.0216            | 0.0004            |  |  |  |  |  |  | 138            | 3 |
| 08JH427 17            | 862            | 966             | 0.89            |      |  | 0.1946            | 0.0167            | 0.0210            | 0.0005            |  |  |  |  |  |  | 134            | 3 |
| 08JH427 18            | 1015           | 1845            | 0.55            |      |  | 0.1563            | 0.0082            | 0.0207            | 0.0003            |  |  |  |  |  |  | 132            | 2 |
| 08JH427 19            | 994            | 1542            | 0.64            |      |  | 0.1533            | 0.0031            | 0.0212            | 0.0003            |  |  |  |  |  |  | 135            | 2 |
| 08JH427 20            | 282            | 397             | 0.71            |      |  | 0.1490            | 0.0046            | 0.0212            | 0.0004            |  |  |  |  |  |  | 135            | 2 |
| 08JH427 21            | 948            | 1734            | 0.55            |      |  | 0.1627            | 0.0039            | 0.0217            | 0.0003            |  |  |  |  |  |  | 138            | 2 |



|                        |               |               |                 |                   |                   |                   |                   |                |               |
|------------------------|---------------|---------------|-----------------|-------------------|-------------------|-------------------|-------------------|----------------|---------------|
| 08JH427 22             | 706           | 760           | 0.93            | 0.1811            | 0.0037            | 0.0261            | 0.0003            | 166            | 2             |
| 08JH427 23             | 806           | 1129          | 0.71            | 0.1793            | 0.0113            | 0.0212            | 0.0004            | 135            | 3             |
| 08JH427 24             | 662           | 587           | 1.13            | 0.2083            | 0.0104            | 0.0213            | 0.0006            | 136            | 4             |
| 08JH 430 01            | 89            | 108           | 0.82            | 0.1064            | 0.0065            | 0.0149            | 0.0005            | 95             | 3             |
| 08JH 430 02            | 76            | 131           | 0.58            | 0.0975            | 0.0055            | 0.0145            | 0.0004            | 93             | 3             |
| 08JH 430 03            | 104           | 174           | 0.60            | 0.0999            | 0.0052            | 0.0151            | 0.0004            | 97             | 3             |
| 08JH 430 04            | 97            | 171           | 0.57            | 0.1016            | 0.0038            | 0.0144            | 0.0003            | 92             | 2             |
| 08JH 430 05            | 90            | 79            | 1.14            | 0.1134            | 0.0098            | 0.0152            | 0.0006            | 97             | 4             |
| 08JH 430 06            | 164           | 148           | 1.11            | 0.0993            | 0.0071            | 0.0149            | 0.0005            | 95             | 3             |
| 08JH 430 07            | 79            | 95            | 0.83            | 0.1068            | 0.0067            | 0.0148            | 0.0005            | 95             | 3             |
| 08JH 430 08            | 103           | 143           | 0.72            | 0.1075            | 0.0043            | 0.0146            | 0.0004            | 93             | 2             |
| 08JH 430 09            | 101           | 129           | 0.78            | 0.1024            | 0.0061            | 0.0148            | 0.0004            | 94             | 3             |
| 08JH 430 10            | 124           | 155           | 0.80            | 0.1068            | 0.0101            | 0.0149            | 0.0007            | 95             | 4             |
| 08JH 430 11            | 108           | 95            | 1.13            | 0.1000            | 0.0066            | 0.0150            | 0.0004            | 96             | 3             |
| <del>08JH 430 12</del> | <del>23</del> | <del>33</del> | <del>0.70</del> | <del>0.1022</del> | <del>0.0291</del> | <del>0.0149</del> | <del>0.0016</del> | <del>95</del>  | <del>40</del> |
| 08JH 430 13            | 83            | 107           | 0.78            | 0.1104            | 0.0056            | 0.0152            | 0.0004            | 97             | 3             |
| <del>08JH 430 14</del> | <del>75</del> | <del>96</del> | <del>0.77</del> | <del>0.1130</del> | <del>0.0188</del> | <del>0.0152</del> | <del>0.0012</del> | <del>98</del>  | <del>7</del>  |
| 08JH 430 15            | 161           | 260           | 0.62            | 0.1008            | 0.0040            | 0.0153            | 0.0004            | 98             | 2             |
| 08JH 430 16            | 112           | 123           | 0.91            | 0.1122            | 0.0100            | 0.0156            | 0.0007            | 100            | 4             |
| 08JH 430 17            | 152           | 214           | 0.71            | 0.1042            | 0.0042            | 0.0154            | 0.0004            | 99             | 2             |
| 08JH 430 18            | 81            | 131           | 0.62            | 0.0997            | 0.0052            | 0.0151            | 0.0004            | 96             | 3             |
| 08JH 430 19            | 76            | 65            | 1.17            | 0.1114            | 0.0134            | 0.0160            | 0.0008            | 102            | 5             |
| <del>08JH 430 20</del> | <del>54</del> | <del>49</del> | <del>1.04</del> | <del>0.0930</del> | <del>0.0115</del> | <del>0.0146</del> | <del>0.0015</del> | <del>94</del>  | <del>9</del>  |
| 08JH 430 21            | 90            | 135           | 0.66            | 0.1073            | 0.0119            | 0.0143            | 0.0007            | 91             | 5             |
| 08JH 430 22            | 120           | 160           | 0.75            | 0.1002            | 0.0039            | 0.0151            | 0.0003            | 96             | 2             |
| 08JH 430 23            | 107           | 159           | 0.67            | 0.1078            | 0.0090            | 0.0144            | 0.0006            | 92             | 4             |
| 08JH 430 24            | 358           | 662           | 0.54            | 0.0960            | 0.0023            | 0.0145            | 0.0003            | 93             | 2             |
| 09GF-31A 01            | 164           | 197           | 0.83            | 0.099             | 5.60              | 0.015             | 1.66              | 93             | 1.5           |
| 09GF-31A 02            | 208           | 227           | 0.92            | 0.099             | 4.22              | 0.015             | 2.16              | 95             | 2.0           |
| 09GF-31A 03            | 169           | 181           | 0.93            | 0.098             | 5.60              | 0.015             | 1.63              | 94             | 1.5           |
| 09GF-31A 04            | 120           | 110           | 1.10            | 0.098             | 5.44              | 0.015             | 1.83              | 93             | 1.7           |
| 09GF-31A 05            | 205           | 255           | 0.80            | 0.099             | 4.87              | 0.015             | 1.59              | 95             | 1.5           |
| 09GF-31A 06            | 172           | 211           | 0.82            | 0.097             | 4.33              | 0.015             | 1.60              | 97             | 1.5           |
| 09GF-31A 07            | 199           | 261           | 0.76            | 0.099             | 4.04              | 0.015             | 1.58              | 95             | 1.5           |
| 09GF-31A 08            | 157           | 177           | 0.89            | 0.102             | 4.14              | 0.015             | 1.65              | 94             | 1.5           |
| 09GF-31A 09            | 168           | 220           | 0.76            | 0.095             | 3.97              | 0.015             | 1.74              | 96             | 1.7           |
| 09GF-31A 10            | 232           | 343           | 0.68            | 0.102             | 3.47              | 0.015             | 1.54              | 95             | 1.4           |
| 09GF-31A 11            | 238           | 334           | 0.71            | 0.098             | 3.28              | 0.015             | 1.68              | 95             | 1.6           |
| 09GF-31A 12            | 160           | 166           | 0.96            | 0.099             | 4.86              | 0.015             | 1.62              | 94             | 1.5           |
| 09GF-31A 13            | 238           | 337           | 0.71            | 0.101             | 3.21              | 0.015             | 1.55              | 94             | 1.4           |
| 09GF-31A 14            | 237           | 334           | 0.71            | 0.094             | 3.27              | 0.015             | 1.53              | 96             | 1.5           |
| 09GF-31A 15            | 172           | 222           | 0.78            | 0.091             | 6.77              | 0.015             | 1.63              | 95             | 1.5           |
| 09GF-31A 16            | 188           | 225           | 0.84            | 0.101             | 3.67              | 0.015             | 1.52              | 97             | 1.5           |
| 09GF-38 01             | 91            | 153           | 0.59            | 0.1017            | 0.0050            | 0.0149            | 0.0004            | 95             | 2             |
| 09GF-38 02             | 93            | 147           | 0.64            | 0.1021            | 0.0045            | 0.0153            | 0.0003            | 98             | 2             |
| 09GF-38 03             | 111           | 186           | 0.59            | 0.0984            | 0.0042            | 0.0152            | 0.0003            | 97             | 2             |
| <del>09GF-38 04</del>  | <del>16</del> | <del>21</del> | <del>0.78</del> | <del>0.1104</del> | <del>0.0216</del> | <del>0.0166</del> | <del>0.0013</del> | <del>106</del> | <del>8</del>  |
| 09GF-38 05             | 125           | 279           | 0.45            | 0.1027            | 0.0034            | 0.0150            | 0.0003            | 96             | 2             |
| 09GF-38 06             | 73            | 98            | 0.75            | 0.1019            | 0.0080            | 0.0154            | 0.0005            | 99             | 3             |
| 09GF-38 07             | 45            | 39            | 1.16            | 0.0991            | 0.0115            | 0.0152            | 0.0007            | 97             | 4             |
| 09GF-38 08             | 48            | 73            | 0.66            | 0.1014            | 0.0076            | 0.0151            | 0.0005            | 96             | 3             |
| <del>09GF-38 09</del>  | <del>17</del> | <del>18</del> | <del>0.98</del> | <del>0.1062</del> | <del>0.0254</del> | <del>0.0150</del> | <del>0.0016</del> | <del>96</del>  | <del>40</del> |
| 09GF-38 10             | 64            | 105           | 0.61            | 0.0978            | 0.0058            | 0.0153            | 0.0004            | 98             | 3             |
| 09GF-38 11             | 47            | 76            | 0.62            | 0.0991            | 0.0057            | 0.0150            | 0.0004            | 96             | 3             |
| 09GF-38 12             | 22            | 33            | 0.68            | 0.1047            | 0.0115            | 0.0155            | 0.0008            | 99             | 5             |
| 09GF-38 13             | 59            | 98            | 0.61            | 0.1208            | 0.0072            | 0.0150            | 0.0004            | 96             | 3             |
| 09GF-38 14             | 215           | 307           | 0.70            | 0.1052            | 0.0110            | 0.0138            | 0.0004            | 88             | 2             |
| 09GF-38 15             | 83            | 131           | 0.63            | 0.1371            | 0.0064            | 0.0163            | 0.0004            | 104            | 3             |
| 09GF-38 16             | 80            | 92            | 0.87            | 0.1017            | 0.0058            | 0.0154            | 0.0004            | 98             | 3             |
| 09GF-38 17             | 77            | 107           | 0.72            | 0.1130            | 0.0134            | 0.0170            | 0.0009            | 109            | 5             |
| 09GF-38 18             | 65            | 94            | 0.69            | 0.1045            | 0.0058            | 0.0150            | 0.0004            | 96             | 2             |
| 09GF-38 19             | 68            | 92            | 0.73            | 0.1019            | 0.0067            | 0.0149            | 0.0004            | 95             | 3             |
| 09GF-38 20             | 61            | 110           | 0.55            | 0.0996            | 0.0074            | 0.0155            | 0.0005            | 99             | 3             |
| 09GF-38 21             | 80            | 127           | 0.63            | 0.1029            | 0.0086            | 0.0157            | 0.0006            | 101            | 3             |
| 09GF-38 22             | 107           | 114           | 0.94            | 0.1038            | 0.0072            | 0.0152            | 0.0005            | 97             | 3             |
| 09GF-38 23             | 61            | 75            | 0.82            | 0.1031            | 0.0070            | 0.0153            | 0.0004            | 98             | 3             |
| 09GF-38 24             | 62            | 108           | 0.58            | 0.1015            | 0.0057            | 0.0151            | 0.0004            | 96             | 2             |
| 09GF-42 01             | 85            | 75            | 1.12            | 0.1043            | 0.0068            | 0.0156            | 0.0004            | 100            | 3             |
| 09GF-42 02             | 57            | 59            | 0.96            | 0.0940            | 0.0063            | 0.0148            | 0.0006            | 95             | 4             |
| 09GF-42 03             | 77            | 95            | 0.81            | 0.1178            | 0.0065            | 0.0153            | 0.0004            | 98             | 3             |
| 09GF-42 04             | 68            | 102           | 0.67            | 0.1017            | 0.0060            | 0.0151            | 0.0004            | 97             | 3             |
| 09GF-42 05             | 94            | 155           | 0.61            | 0.1025            | 0.0049            | 0.0152            | 0.0003            | 97             | 2             |
| 09GF-42 06             | 120           | 109           | 1.10            | 0.1198            | 0.0312            | 0.0145            | 0.0006            | 92             | 4             |
| 09GF-42 07             | 74            | 112           | 0.66            | 0.1014            | 0.0065            | 0.0155            | 0.0004            | 99             | 3             |
| 09GF-42 08             | 106           | 169           | 0.63            | 0.1068            | 0.0067            | 0.0157            | 0.0004            | 100            | 3             |



|            |     |     |      |        |        |        |        |    |   |
|------------|-----|-----|------|--------|--------|--------|--------|----|---|
| 09GF-42 09 | 59  | 74  | 0.79 | 0.1110 | 0.0080 | 0.0155 | 0.0005 | 99 | 3 |
| 09GF-42 10 | 63  | 64  | 0.98 | 0.1002 | 0.0129 | 0.0150 | 0.0008 | 96 | 5 |
| 09GF-42 11 | 94  | 147 | 0.64 | 0.1098 | 0.0066 | 0.0154 | 0.0004 | 99 | 3 |
| 09GF-42 12 | 78  | 119 | 0.65 | 0.1057 | 0.0052 | 0.0153 | 0.0004 | 98 | 2 |
| 09GF-42 13 | 143 | 110 | 1.29 | 0.1071 | 0.0074 | 0.0154 | 0.0005 | 99 | 3 |
| 09GF-42 14 | 82  | 120 | 0.68 | 0.1079 | 0.0059 | 0.0153 | 0.0004 | 98 | 2 |
| 09GF-42 15 | 95  | 167 | 0.57 | 0.1010 | 0.0042 | 0.0152 | 0.0003 | 97 | 2 |
| 09GF-42 16 | 66  | 101 | 0.66 | 0.0985 | 0.0127 | 0.0139 | 0.0005 | 89 | 3 |
| 09GF-42 17 | 41  | 29  | 1.45 | 0.1105 | 0.0200 | 0.0146 | 0.0011 | 94 | 7 |
| 09GF-42 18 | 78  | 106 | 0.73 | 0.1083 | 0.0083 | 0.0145 | 0.0005 | 93 | 3 |
| 09GF-42 19 | 82  | 132 | 0.63 | 0.0909 | 0.0053 | 0.0151 | 0.0004 | 97 | 2 |
| 09GF-42 20 | 42  | 75  | 0.56 | 0.1181 | 0.0102 | 0.0155 | 0.0006 | 99 | 4 |
| 09GF-42 21 | 44  | 58  | 0.77 | 0.0747 | 0.0105 | 0.0131 | 0.0007 | 84 | 5 |
| 09GF-42 22 | 108 | 169 | 0.64 | 0.0979 | 0.0046 | 0.0150 | 0.0003 | 96 | 2 |
| 09GF-42 23 | 24  | 31  | 0.80 | 0.1019 | 0.0162 | 0.0129 | 0.0008 | 82 | 5 |
| 09GF-42 24 | 31  | 40  | 0.78 | 0.1164 | 0.0093 | 0.0146 | 0.0006 | 94 | 4 |

N18, Xianyou (Li et al., 2009; Guo et al., 2012; Liu et al., 2016)

|                |     |     |      |        |     |       |     |        |      |      |     |      |     |     |     |
|----------------|-----|-----|------|--------|-----|-------|-----|--------|------|------|-----|------|-----|-----|-----|
| T207-3706-1.1  | 457 | 375 | 1.22 | 0.0565 | 6.9 | 0.181 | 7.9 | 0.0233 | 4    | 471  | 150 | 148  | 5.8 | 160 | 7.7 |
| T207-3706-2.1  | 253 | 452 | 0.56 | 0.0571 | 4.1 | 0.179 | 5.9 | 0.0227 | 4.2  | 497  | 90  | 144  | 6   | 152 | 10  |
| T207-3706-3.1  | 142 | 156 | 0.91 | 0.0637 | 7.7 | 0.191 | 8.8 | 0.0217 | 4.2  | 731  | 160 | 139  | 5.8 | 157 | 9   |
| T207-3706-4.1  | 382 | 480 | 0.80 | 0.06   | 3.1 | 0.18  | 5   | 0.0218 | 4    | 605  | 68  | 139  | 5.4 | 145 | 6.5 |
| T207-3706-5.1  | 230 | 259 | 0.89 | 0.0581 | 7.9 | 0.192 | 8.9 | 0.0239 | 4.1  | 534  | 170 | 153  | 6.1 | 167 | 9.2 |
| T207-3706-6.1  | 350 | 342 | 1.02 | 0.0515 | 11  | 0.149 | 12  | 0.0211 | 4.1  | 263  | 260 | 134  | 5.4 | 139 | 8.3 |
| T207-3706-7.1  | 15  | 34  | 0.44 | 0.084  | 19  | 0.72  | 20  | 0.0621 | 4.7  | 1295 | 370 | 388  | 18  | 539 | 92  |
| T207-3706-8.1  | 2   | 2   | 1.00 | 0.077  | 23  | 477   | 100 | 2230   | 2000 |      |     | 4027 | 750 |     |     |
| T207-3706-9.1  | 246 | 198 | 1.24 | 0.0693 | 13  | 0.254 | 14  | 0.0265 | 4.1  | 907  | 280 | 169  | 6.8 | 176 | 11  |
| T207-3706-10.1 | 716 | 318 | 2.25 | 0.0557 | 5.1 | 0.196 | 6.5 | 0.0255 | 4    | 440  | 110 | 163  | 6.5 | 164 | 8   |

|                |     |     |      |        |     |       |     |        |     |       |      |     |     |     |     |
|----------------|-----|-----|------|--------|-----|-------|-----|--------|-----|-------|------|-----|-----|-----|-----|
| T207-3710-1.1  | 122 | 185 | 0.66 | 0.0541 | 13  | 0.156 | 14  | 0.0209 | 4.9 | 376   | 290  | 133 | 6.4 | 142 | 12  |
| T207-3710-2.1  | 86  | 83  | 1.04 | 0.048  | 87  | 0.13  | 88  | 0.0196 | 7   | 120   | 2100 | 125 | 8.7 | 125 | 39  |
| T207-3710-3.1  | 106 | 164 | 0.65 | 0.046  | 14  | 0.134 | 14  | 0.0211 | 4.1 | 20.5  | 330  | 135 | 5.5 | 128 | 10  |
| T207-3710-4.1  | 120 | 136 | 0.88 | 0.023  | 58  | 0.064 | 58  | 0.0203 | 4.4 | 22100 | 2200 | 130 | 5.7 | 100 | 16  |
| T207-3710-5.1  | 66  | 84  | 0.79 | 0.036  | 43  | 0.098 | 43  | 0.0197 | 5.2 | 2640  | 1200 | 126 | 6.5 | 115 | 20  |
| T207-3710-6.1  | 104 | 183 | 0.57 | 0.029  | 40  | 0.074 | 40  | 0.0187 | 5   | 21300 | 1300 | 120 | 6   | 94  | 19  |
| T207-3710-7.1  | 89  | 140 | 0.64 | 0.035  | 33  | 0.098 | 33  | 0.0204 | 4.5 | 2724  | 910  | 130 | 5.9 | 105 | 19  |
| T207-3710-8.1  | 102 | 180 | 0.57 | 0.0528 | 8.8 | 0.154 | 9.8 | 0.0211 | 4.2 | 321   | 200  | 135 | 5.5 | 147 | 11  |
| T207-3710-9.1  | 84  | 166 | 0.51 | 0.0527 | 14  | 0.15  | 14  | 0.0207 | 4.2 | 314   | 310  | 132 | 5.5 | 131 | 15  |
| T207-3710-10.1 | 106 | 166 | 0.64 | 0.023  | 53  | 0.06  | 53  | 0.0188 | 4.4 | 22040 | 2000 | 120 | 5.3 | 74  | 18  |
| T207-3710-11.1 | 54  | 120 | 0.45 | 0.0395 | 13  | 0.107 | 14  | 0.0197 | 4.9 | 2381  | 350  | 126 | 6.1 | 120 | 12  |
| T207-3710-12.1 | 190 | 285 | 0.67 | 0.0457 | 8   | 0.132 | 9   | 0.0209 | 4.1 | 216   | 190  | 133 | 5.3 | 128 | 8.2 |
| T207-3710-13.1 | 72  | 100 | 0.72 | 0.024  | 82  | 0.066 | 82  | 0.0198 | 4.9 | 21880 | 3000 | 126 | 6.1 | 103 | 27  |
| T207-3710-14.1 | 909 | 415 | 2.19 | 0.0506 | 5.6 | 0.158 | 6.8 | 0.0226 | 4   | 224   | 130  | 144 | 5.7 | 131 | 5.8 |
| T207-3710-15.1 | 188 | 250 | 0.75 | 0.0489 | 8.1 | 0.141 | 9   | 0.0209 | 4   | 142   | 190  | 133 | 5.3 | 149 | 10  |

|            |      |      |      |        |        |        |        |     |   |
|------------|------|------|------|--------|--------|--------|--------|-----|---|
| 08JH396 01 | 94   | 139  | 0.68 | 0.1553 | 0.0098 | 0.0210 | 0.0006 | 134 | 4 |
| 08JH396 02 | 238  | 287  | 0.83 | 0.1478 | 0.0050 | 0.0209 | 0.0005 | 134 | 3 |
| 08JH396 03 | 386  | 568  | 0.68 | 0.1501 | 0.0027 | 0.0214 | 0.0004 | 136 | 2 |
| 08JH396 04 | 407  | 613  | 0.66 | 0.1523 | 0.0041 | 0.0211 | 0.0004 | 135 | 3 |
| 08JH396 05 | 379  | 479  | 0.79 | 0.1342 | 0.0125 | 0.0199 | 0.0005 | 127 | 3 |
| 08JH396 06 | 171  | 242  | 0.71 | 0.1460 | 0.0083 | 0.0209 | 0.0006 | 133 | 4 |
| 08JH396 07 | 1480 | 984  | 1.50 | 0.1546 | 0.0040 | 0.0207 | 0.0004 | 132 | 3 |
| 08JH396 08 | 222  | 354  | 0.63 | 0.1383 | 0.0051 | 0.0198 | 0.0004 | 127 | 3 |
| 08JH396 09 | 146  | 242  | 0.60 | 0.1354 | 0.0050 | 0.0200 | 0.0004 | 128 | 3 |
| 08JH396 10 | 190  | 225  | 0.84 | 0.1465 | 0.0053 | 0.0212 | 0.0005 | 135 | 3 |
| 08JH396 12 | 1653 | 1361 | 1.22 | 0.1431 | 0.0038 | 0.0210 | 0.0004 | 134 | 3 |
| 08JH396 13 | 439  | 537  | 0.82 | 0.1441 | 0.0032 | 0.0207 | 0.0004 | 132 | 2 |
| 08JH396 14 | 138  | 149  | 0.93 | 0.1382 | 0.0085 | 0.0205 | 0.0006 | 131 | 4 |
| 08JH396 16 | 172  | 207  | 0.83 | 0.1473 | 0.0058 | 0.0210 | 0.0005 | 134 | 3 |
| 08JH396 17 | 658  | 416  | 1.58 | 0.1457 | 0.0177 | 0.0205 | 0.0005 | 131 | 3 |
| 08JH396 18 | 289  | 307  | 0.94 | 0.1349 | 0.0056 | 0.0193 | 0.0005 | 123 | 3 |
| 08JH396 19 | 377  | 478  | 0.79 | 0.1518 | 0.0065 | 0.0201 | 0.0005 | 128 | 3 |
| 08JH396 20 | 206  | 362  | 0.57 | 0.1382 | 0.0119 | 0.0195 | 0.0005 | 125 | 3 |
| 08JH396 21 | 307  | 481  | 0.64 | 0.1505 | 0.0082 | 0.0206 | 0.0006 | 132 | 4 |
| 08JH396 22 | 261  | 352  | 0.74 | 0.1396 | 0.0059 | 0.0203 | 0.0005 | 129 | 3 |
| 08JH396 23 | 243  | 262  | 0.93 | 0.1362 | 0.0059 | 0.0204 | 0.0005 | 130 | 3 |
| 08JH396 24 | 123  | 174  | 0.71 | 0.1521 | 0.0064 | 0.0218 | 0.0005 | 139 | 3 |

|           |     |      |      |       |      |       |      |     |   |
|-----------|-----|------|------|-------|------|-------|------|-----|---|
| JH-400@1  | 345 | 488  | 0.71 | 0.139 | 2.12 | 0.021 | 1.51 | 132 | 2 |
| JH-400@2  | 350 | 213  | 1.64 | 0.135 | 2.57 | 0.021 | 1.52 | 132 | 2 |
| JH-400@3  | 592 | 1163 | 0.51 | 0.140 | 1.74 | 0.021 | 1.50 | 134 | 2 |
| JH-400@4  | 114 | 191  | 0.60 | 0.145 | 2.82 | 0.021 | 1.55 | 135 | 2 |
| JH-400@5  | 84  | 145  | 0.58 | 0.137 | 2.97 | 0.021 | 1.58 | 132 | 2 |
| JH-400@6  | 223 | 281  | 0.79 | 0.134 | 3.81 | 0.021 | 1.68 | 131 | 2 |
| JH-400@7  | 82  | 128  | 0.64 | 0.143 | 3.94 | 0.021 | 1.57 | 133 | 2 |
| JH-400@8  | 281 | 289  | 0.97 | 0.143 | 3.00 | 0.021 | 1.52 | 136 | 2 |
| JH-400@9  | 345 | 453  | 0.76 | 0.137 | 2.72 | 0.021 | 1.61 | 134 | 2 |
| JH-400@10 | 145 | 202  | 0.72 | 0.138 | 3.25 | 0.021 | 1.52 | 132 | 2 |
| JH-400@11 | 140 | 175  | 0.80 | 0.144 | 4.25 | 0.021 | 1.55 | 136 | 2 |



|             |     |     |      |        |        |        |        |     |   |
|-------------|-----|-----|------|--------|--------|--------|--------|-----|---|
| JH-400@12   | 111 | 145 | 0.77 | 0.124  | 13.31  | 0.021  | 1.59   | 133 | 2 |
| JH-400@13   | 185 | 229 | 0.81 | 0.141  | 3.10   | 0.021  | 1.54   | 134 | 2 |
| JH-400@14   | 220 | 326 | 0.68 | 0.135  | 2.73   | 0.021  | 1.53   | 135 | 2 |
| JH-400@15   | 220 | 326 | 0.68 | 0.135  | 2.73   | 0.021  | 1.53   | 135 | 2 |
| JH-400@16   | 305 | 317 | 0.96 | 0.139  | 3.24   | 0.021  | 1.51   | 134 | 2 |
| JH-400@17   | 246 | 375 | 0.66 | 0.134  | 3.16   | 0.021  | 1.53   | 133 | 2 |
| JH-400@18   | 325 | 307 | 1.06 | 0.138  | 3.16   | 0.022  | 1.53   | 138 | 2 |
|             |     |     |      |        |        |        |        |     |   |
| 08JH408 01  | 118 | 266 | 0.44 | 0.1403 | 0.0047 | 0.0207 | 0.0005 | 132 | 3 |
| 08JH408 02  | 125 | 195 | 0.64 | 0.1241 | 0.0105 | 0.0195 | 0.0005 | 125 | 3 |
| 08JH408 03  | 59  | 89  | 0.66 | 0.1493 | 0.0135 | 0.0205 | 0.0008 | 131 | 5 |
| 08JH408 04  | 116 | 164 | 0.70 | 0.1430 | 0.0067 | 0.0211 | 0.0005 | 134 | 3 |
| 08JH408 05  | 149 | 241 | 0.62 | 0.1429 | 0.0061 | 0.0205 | 0.0005 | 130 | 3 |
| 08JH408 06  | 65  | 106 | 0.61 | 0.1443 | 0.0082 | 0.0207 | 0.0006 | 132 | 4 |
| 08JH408 07  | 134 | 243 | 0.55 | 0.1366 | 0.0079 | 0.0197 | 0.0006 | 126 | 4 |
| 08JH408 08  | 251 | 342 | 0.73 | 0.1389 | 0.0041 | 0.0204 | 0.0004 | 130 | 3 |
| 08JH408 09  | 218 | 367 | 0.59 | 0.1386 | 0.0058 | 0.0202 | 0.0005 | 129 | 3 |
| 08JH408 10  | 110 | 126 | 0.87 | 0.1529 | 0.0342 | 0.0203 | 0.0011 | 130 | 7 |
| 08JH408 11  | 110 | 161 | 0.69 | 0.1470 | 0.0144 | 0.0212 | 0.0010 | 135 | 6 |
| 08JH408 12  | 148 | 263 | 0.56 | 0.1380 | 0.0062 | 0.0204 | 0.0005 | 130 | 3 |
| 08JH408 13  | 225 | 214 | 1.05 | 0.1460 | 0.0091 | 0.0208 | 0.0007 | 133 | 4 |
| 08JH408 14  | 122 | 205 | 0.60 | 0.1359 | 0.0076 | 0.0206 | 0.0006 | 131 | 4 |
| 08JH408 15  | 385 | 367 | 1.05 | 0.1347 | 0.0055 | 0.0205 | 0.0005 | 131 | 3 |
| 08JH408 16  | 123 | 289 | 0.43 | 0.1425 | 0.0047 | 0.0209 | 0.0005 | 133 | 3 |
| 08JH408 17  | 236 | 355 | 0.66 | 0.1443 | 0.0035 | 0.0206 | 0.0004 | 132 | 3 |
| 08JH408 18  | 186 | 309 | 0.60 | 0.1533 | 0.0066 | 0.0212 | 0.0006 | 135 | 3 |
| 08JH408 19  | 199 | 333 | 0.60 | 0.1900 | 0.0195 | 0.0201 | 0.0007 | 128 | 4 |
| 08JH408 20  | 231 | 369 | 0.62 | 0.1411 | 0.0041 | 0.0210 | 0.0004 | 134 | 3 |
| 08JH408 21  | 218 | 323 | 0.67 | 0.1497 | 0.0054 | 0.0206 | 0.0005 | 131 | 3 |
| 08JH408 22  | 288 | 312 | 0.92 | 0.1942 | 0.0083 | 0.0197 | 0.0006 | 126 | 4 |
| 08JH408 23  | 172 | 238 | 0.72 | 0.1403 | 0.0064 | 0.0206 | 0.0005 | 131 | 3 |
| 08JH408 24  | 400 | 576 | 0.69 | 0.1391 | 0.0029 | 0.0204 | 0.0004 | 130 | 2 |
|             |     |     |      |        |        |        |        |     |   |
| 08JH410 01  | 340 | 555 | 0.61 | 0.1241 | 0.0053 | 0.0188 | 0.0004 | 120 | 3 |
| 08JH410 02  | 297 | 322 | 0.92 | 0.1538 | 0.0059 | 0.0212 | 0.0004 | 135 | 3 |
| 08JH410 03  | 512 | 896 | 0.57 | 0.1473 | 0.0060 | 0.0200 | 0.0004 | 127 | 3 |
| 08JH410 04  | 424 | 513 | 0.83 | 0.1515 | 0.0068 | 0.0207 | 0.0005 | 132 | 3 |
| 08JH410 05  | 336 | 416 | 0.81 | 0.1425 | 0.0053 | 0.0209 | 0.0004 | 133 | 3 |
| 08JH410 06  | 358 | 566 | 0.63 | 0.1460 | 0.0055 | 0.0206 | 0.0004 | 131 | 3 |
| 08JH410 07  | 152 | 167 | 0.91 | 0.1452 | 0.0097 | 0.0211 | 0.0006 | 135 | 4 |
| 08JH410 08  | 148 | 128 | 1.16 | 0.1477 | 0.0135 | 0.0207 | 0.0009 | 132 | 5 |
| 08JH410 09  | 171 | 109 | 1.57 | 0.2358 | 0.0358 | 0.0194 | 0.0007 | 124 | 4 |
| 08JH410 10  | 89  | 83  | 1.07 | 0.1550 | 0.0139 | 0.0211 | 0.0008 | 135 | 5 |
| 08JH410 11  | 299 | 391 | 0.76 | 0.1467 | 0.0067 | 0.0212 | 0.0005 | 135 | 3 |
| 08JH410 12  | 306 | 262 | 1.17 | 0.1472 | 0.0083 | 0.0209 | 0.0006 | 133 | 4 |
| 08JH410 13  | 327 | 551 | 0.59 | 0.1754 | 0.0067 | 0.0207 | 0.0004 | 132 | 3 |
| 08JH410 14  | 246 | 329 | 0.75 | 0.1718 | 0.0087 | 0.0180 | 0.0005 | 115 | 3 |
| 08JH410 15  | 236 | 207 | 1.14 | 0.2148 | 0.0290 | 0.0203 | 0.0007 | 130 | 4 |
| 08JH410 16  | 163 | 128 | 1.28 | 0.1960 | 0.0331 | 0.0210 | 0.0008 | 134 | 5 |
| 08JH410 17  | 390 | 515 | 0.76 | 0.1593 | 0.0045 | 0.0226 | 0.0004 | 144 | 2 |
| 08JH410 18  | 249 | 282 | 0.88 | 0.1511 | 0.0224 | 0.0205 | 0.0008 | 131 | 5 |
| 08JH410 19  | 177 | 320 | 0.55 | 0.1419 | 0.0053 | 0.0214 | 0.0004 | 137 | 3 |
| 08JH410 20  | 568 | 768 | 0.74 | 0.1469 | 0.0047 | 0.0213 | 0.0004 | 136 | 2 |
| 08JH410 21  | 119 | 176 | 0.68 | 0.1688 | 0.0104 | 0.0228 | 0.0007 | 146 | 4 |
| 08JH410 22  | 207 | 215 | 0.96 | 0.1299 | 0.0153 | 0.0205 | 0.0007 | 131 | 4 |
| 08JH410 23  | 264 | 318 | 0.83 | 0.1738 | 0.0088 | 0.0191 | 0.0005 | 122 | 3 |
| 08JH410 24  | 229 | 218 | 1.05 | 0.1543 | 0.0177 | 0.0203 | 0.0005 | 129 | 3 |
|             |     |     |      |        |        |        |        |     |   |
| 08JH-415@1  | 331 | 534 | 0.62 | 0.134  | 2.2    | 0.021  | 1.54   | 133 | 2 |
| 08JH-415@2  | 157 | 185 | 0.85 | 0.141  | 3.3    | 0.020  | 1.60   | 130 | 2 |
| 08JH-415@3  | 107 | 146 | 0.73 | 0.137  | 3.2    | 0.021  | 1.55   | 133 | 2 |
| 08JH-415@4  | 211 | 292 | 0.72 | 0.139  | 2.6    | 0.020  | 1.63   | 130 | 2 |
| 08JH-415@5  | 129 | 161 | 0.80 | 0.138  | 3.2    | 0.020  | 1.62   | 130 | 2 |
| 08JH-415@6  | 118 | 170 | 0.70 | 0.137  | 3.0    | 0.021  | 1.54   | 131 | 2 |
| 08JH-415@7  | 114 | 154 | 0.74 | 0.139  | 3.2    | 0.020  | 1.56   | 129 | 2 |
| 08JH-415@8  | 439 | 578 | 0.76 | 0.139  | 2.2    | 0.021  | 1.55   | 133 | 2 |
| 08JH-415@9  | 317 | 368 | 0.86 | 0.139  | 2.5    | 0.021  | 1.50   | 134 | 2 |
| 08JH-415@10 | 99  | 177 | 0.56 | 0.136  | 3.3    | 0.021  | 1.54   | 132 | 2 |
| 08JH-415@11 | 170 | 208 | 0.82 | 0.135  | 2.8    | 0.021  | 1.56   | 132 | 2 |
| 08JH-415@12 | 274 | 251 | 1.09 | 0.136  | 3.0    | 0.021  | 1.51   | 132 | 2 |
| 08JH-415@13 | 100 | 159 | 0.63 | 0.142  | 2.9    | 0.021  | 1.51   | 133 | 2 |
| 08JH-415@14 | 287 | 390 | 0.74 | 0.137  | 2.5    | 0.020  | 1.50   | 130 | 2 |
| 08JH-415@15 | 78  | 124 | 0.62 | 0.140  | 3.8    | 0.021  | 1.59   | 132 | 2 |
| 08JH-415@16 | 74  | 110 | 0.67 | 0.156  | 23.9   | 0.020  | 2.01   | 129 | 3 |
| 08JH-415@17 | 350 | 538 | 0.65 | 0.140  | 2.3    | 0.021  | 1.51   | 135 | 2 |
| 08JH-415@18 | 367 | 443 | 0.83 | 0.124  | 19.8   | 0.021  | 1.79   | 133 | 2 |
|             |     |     |      |        |        |        |        |     |   |
| 08JH-419@1  | 218 | 413 | 0.53 | 0.160  | 2.54   | 0.024  | 1.55   | 153 | 2 |
| 08JH-419@2  | 115 | 273 | 0.42 | 0.146  | 2.83   | 0.023  | 1.50   | 145 | 2 |



|             |      |      |      |         |         |         |         |         |         |         |         |      |     |     |    |     |   |     |    |      |
|-------------|------|------|------|---------|---------|---------|---------|---------|---------|---------|---------|------|-----|-----|----|-----|---|-----|----|------|
| 08JH-419@3  | 203  | 240  | 0.85 |         |         | 0.140   | 2.63    | 0.021   | 1.52    |         |         |      |     |     |    |     |   | 132 | 2  |      |
| 08JH-419@4  | 81   | 195  | 0.42 |         |         | 0.139   | 4.30    | 0.021   | 1.57    |         |         |      |     |     |    |     |   | 137 | 2  |      |
| 08JH-419@5  | 209  | 336  | 0.62 |         |         | 0.147   | 2.48    | 0.022   | 1.51    |         |         |      |     |     |    |     |   | 142 | 2  |      |
| 08JH-419@6  | 51   | 115  | 0.45 |         |         | 0.166   | 3.19    | 0.025   | 1.53    |         |         |      |     |     |    |     |   | 158 | 2  |      |
| 08JH-419@7  | 274  | 397  | 0.69 |         |         | 0.138   | 2.22    | 0.021   | 1.50    |         |         |      |     |     |    |     |   | 132 | 2  |      |
| 08JH-419@8  | 144  | 267  | 0.54 |         |         | 0.146   | 2.87    | 0.022   | 1.52    |         |         |      |     |     |    |     |   | 139 | 2  |      |
| 08JH-419@9  | 130  | 458  | 0.28 |         |         | 0.179   | 2.00    | 0.027   | 1.50    |         |         |      |     |     |    |     |   | 169 | 3  |      |
| 08JH-419@10 | 447  | 518  | 0.86 |         |         | 0.154   | 2.03    | 0.023   | 1.51    |         |         |      |     |     |    |     |   | 144 | 2  |      |
| 08JH-419@11 | 2067 | 1882 | 1.10 |         |         | 0.158   | 1.67    | 0.023   | 1.50    |         |         |      |     |     |    |     |   | 148 | 2  |      |
| 08JH-419@12 | 141  | 308  | 0.46 |         |         | 0.179   | 2.33    | 0.026   | 1.51    |         |         |      |     |     |    |     |   | 163 | 2  |      |
| 08JH-419@13 | 284  | 399  | 0.71 |         |         | 0.149   | 3.44    | 0.022   | 1.52    |         |         |      |     |     |    |     |   | 141 | 2  |      |
| 08JH-419@14 | 243  | 491  | 0.49 |         |         | 0.155   | 2.25    | 0.022   | 1.50    |         |         |      |     |     |    |     |   | 143 | 2  |      |
| 08JH-419@16 | 206  | 273  | 0.75 |         |         | 0.123   | 10.40   | 0.019   | 1.53    |         |         |      |     |     |    |     |   | 124 | 2  |      |
| 08JH-419@17 | 84   | 126  | 0.66 |         |         | 0.165   | 3.60    | 0.025   | 1.51    |         |         |      |     |     |    |     |   | 159 | 2  |      |
| 08JH-419@18 | 124  | 403  | 0.31 |         |         | 0.172   | 2.36    | 0.025   | 1.51    |         |         |      |     |     |    |     |   | 160 | 2  |      |
| 08JH-419@19 | 1580 | 2122 | 0.74 |         |         | 0.169   | 1.68    | 0.025   | 1.50    |         |         |      |     |     |    |     |   | 160 | 2  |      |
| 08JH-419@20 | 143  | 156  | 0.92 |         |         | 0.093   | 22.25   | 0.020   | 1.51    |         |         |      |     |     |    |     |   | 130 | 2  |      |
| 08JH-419@21 | 523  | 1160 | 0.45 |         |         | 0.154   | 1.78    | 0.023   | 1.50    |         |         |      |     |     |    |     |   | 147 | 2  |      |
|             |      |      |      |         |         |         |         |         |         |         |         |      |     |     |    |     |   |     |    |      |
| 08JH421 01  | 340  | 555  | 0.61 |         |         | 0.1491  | 0.0059  | 0.0213  | 0.0004  |         |         |      |     |     |    |     |   | 136 | 3  |      |
| 08JH421 02  | 297  | 322  | 0.92 |         |         | 0.1492  | 0.0047  | 0.0216  | 0.0003  |         |         |      |     |     |    |     |   | 138 | 2  |      |
| 08JH421 03  | 512  | 896  | 0.57 |         |         | 0.1504  | 0.0049  | 0.0216  | 0.0003  |         |         |      |     |     |    |     |   | 138 | 2  |      |
| 08JH421 04  | 424  | 513  | 0.83 |         |         | 0.1831  | 0.0083  | 0.0264  | 0.0006  |         |         |      |     |     |    |     |   | 168 | 4  |      |
| 08JH421 05  | 336  | 416  | 0.81 |         |         | 0.1483  | 0.0075  | 0.0213  | 0.0005  |         |         |      |     |     |    |     |   | 136 | 3  |      |
| 08JH421 06  | 358  | 566  | 0.63 |         |         | 0.1429  | 0.0098  | 0.0208  | 0.0006  |         |         |      |     |     |    |     |   | 133 | 4  |      |
| 08JH421 07  | 152  | 167  | 0.91 |         |         | 0.1423  | 0.0076  | 0.0207  | 0.0005  |         |         |      |     |     |    |     |   | 132 | 3  |      |
| 08JH421 08  | 148  | 128  | 1.16 |         |         | 0.1505  | 0.0049  | 0.0217  | 0.0004  |         |         |      |     |     |    |     |   | 139 | 2  |      |
| 08JH421 09  | 171  | 109  | 1.57 |         |         | 0.1398  | 0.0043  | 0.0202  | 0.0003  |         |         |      |     |     |    |     |   | 129 | 2  |      |
| 08JH421 10  | 89   | 83   | 1.07 |         |         | 0.1514  | 0.0090  | 0.0219  | 0.0005  |         |         |      |     |     |    |     |   | 139 | 3  |      |
| 08JH421 11  | 299  | 394  | 0.76 |         |         | 0.1459  | 0.0279  | 0.0223  | 0.0011  |         |         |      |     |     |    |     |   | 442 | 7  |      |
| 08JH421 12  | 306  | 262  | 1.17 |         |         | 0.1513  | 0.0083  | 0.0220  | 0.0006  |         |         |      |     |     |    |     |   | 140 | 3  |      |
| 08JH421 13  | 327  | 551  | 0.59 |         |         | 0.1821  | 0.0080  | 0.0231  | 0.0005  |         |         |      |     |     |    |     |   | 147 | 3  |      |
| 08JH421 14  | 246  | 329  | 0.75 |         |         | 0.1590  | 0.0096  | 0.0220  | 0.0006  |         |         |      |     |     |    |     |   | 140 | 4  |      |
| 08JH421 15  | 236  | 207  | 1.14 |         |         | 0.1512  | 0.0064  | 0.0217  | 0.0005  |         |         |      |     |     |    |     |   | 138 | 3  |      |
| 08JH421 16  | 163  | 128  | 1.28 |         |         | 0.1568  | 0.0034  | 0.0228  | 0.0003  |         |         |      |     |     |    |     |   | 146 | 2  |      |
| 08JH421 17  | 390  | 515  | 0.76 |         |         | 0.1435  | 0.0057  | 0.0214  | 0.0004  |         |         |      |     |     |    |     |   | 137 | 3  |      |
| 08JH421 18  | 249  | 282  | 0.88 |         |         | 0.1464  | 0.0065  | 0.0209  | 0.0005  |         |         |      |     |     |    |     |   | 133 | 3  |      |
| 08JH421 19  | 177  | 320  | 0.55 |         |         | 0.1600  | 0.0086  | 0.0215  | 0.0006  |         |         |      |     |     |    |     |   | 137 | 3  |      |
| 08JH421 20  | 568  | 768  | 0.74 |         |         | 0.1350  | 0.0161  | 0.0210  | 0.0007  |         |         |      |     |     |    |     |   | 134 | 4  |      |
| 08JH421 21  | 119  | 176  | 0.68 |         |         | 0.1728  | 0.0070  | 0.0202  | 0.0005  |         |         |      |     |     |    |     |   | 129 | 3  |      |
| 08JH421 22  | 207  | 215  | 0.96 |         |         | 0.1514  | 0.0089  | 0.0216  | 0.0006  |         |         |      |     |     |    |     |   | 138 | 4  |      |
| 08JH421 23  | 264  | 318  | 0.83 |         |         | 0.1453  | 0.0057  | 0.0216  | 0.0004  |         |         |      |     |     |    |     |   | 137 | 3  |      |
| 08JH421 24  | 229  | 218  | 1.05 |         |         | 0.1400  | 0.0076  | 0.0206  | 0.0005  |         |         |      |     |     |    |     |   | 131 | 3  |      |
|             |      |      |      |         |         |         |         |         |         |         |         |      |     |     |    |     |   |     |    |      |
| 08JH425 01  | 188  | 389  | 0.48 |         |         | 0.0479  | 0.0011  | 0.1422  | 0.0030  |         |         |      |     |     |    |     |   | 138 | 3  |      |
| 08JH425 02  | 132  | 262  | 0.50 |         |         | 0.0485  | 0.0017  | 0.1616  | 0.0051  |         |         |      |     |     |    |     |   | 154 | 3  |      |
| 08JH425 03  | 99   | 156  | 0.64 |         |         | 0.0503  | 0.0035  | 0.1464  | 0.0093  |         |         |      |     |     |    |     |   | 135 | 4  |      |
| 08JH425 04  | 479  | 708  | 0.68 |         |         | 0.0495  | 0.0010  | 0.1446  | 0.0027  |         |         |      |     |     |    |     |   | 135 | 2  |      |
| 08JH425 05  | 167  | 265  | 0.63 |         |         | 0.0563  | 0.0030  | 0.1572  | 0.0075  |         |         |      |     |     |    |     |   | 129 | 4  |      |
| 08JH425 06  | 263  | 355  | 0.74 |         |         | 0.0567  | 0.0014  | 0.1697  | 0.0039  |         |         |      |     |     |    |     |   | 139 | 3  |      |
| 08JH425 07  | 149  | 250  | 0.60 |         |         | 0.0582  | 0.0019  | 0.1749  | 0.0052  |         |         |      |     |     |    |     |   | 139 | 3  |      |
| 08JH425 08  | 331  | 422  | 0.78 |         |         | 0.0491  | 0.0017  | 0.1440  | 0.0046  |         |         |      |     |     |    |     |   | 136 | 3  |      |
| 08JH425 09  | 113  | 142  | 0.79 |         |         | 0.0540  | 0.0027  | 0.1485  | 0.0069  |         |         |      |     |     |    |     |   | 128 | 3  |      |
| 08JH425 10  | 173  | 250  | 0.69 |         |         | 0.0578  | 0.0026  | 0.1636  | 0.0066  |         |         |      |     |     |    |     |   | 131 | 3  |      |
| 08JH425 11  | 167  | 324  | 0.52 |         |         | 0.0527  | 0.0047  | 0.1572  | 0.0132  |         |         |      |     |     |    |     |   | 138 | 4  |      |
| 08JH425 12  | 181  | 218  | 0.83 |         |         | 0.0520  | 0.0027  | 0.1516  | 0.0071  |         |         |      |     |     |    |     |   | 135 | 4  |      |
| 08JH425 13  | 97   | 140  | 0.70 |         |         | 0.0490  | 0.0031  | 0.1531  | 0.0090  |         |         |      |     |     |    |     |   | 145 | 4  |      |
| 08JH425 14  | 191  | 314  | 0.61 |         |         | 0.0560  | 0.0023  | 0.1536  | 0.0058  |         |         |      |     |     |    |     |   | 127 | 3  |      |
| 08JH425 15  | 512  | 774  | 0.66 |         |         | 0.0523  | 0.0012  | 0.1533  | 0.0031  |         |         |      |     |     |    |     |   | 136 | 3  |      |
| 08JH425 16  | 143  | 152  | 0.95 |         |         | 0.0520  | 0.0033  | 0.1459  | 0.0087  |         |         |      |     |     |    |     |   | 130 | 4  |      |
| 08JH425 17  | 498  | 832  | 0.60 |         |         | 0.0513  | 0.0014  | 0.1520  | 0.0038  |         |         |      |     |     |    |     |   | 137 | 3  |      |
| 08JH425 18  | 334  | 288  | 1.16 |         |         | 0.0645  | 0.0059  | 0.1798  | 0.0157  |         |         |      |     |     |    |     |   | 129 | 3  |      |
| 08JH425 19  | 101  | 488  | 0.21 |         |         | 0.0487  | 0.0026  | 0.1417  | 0.0067  |         |         |      |     |     |    |     |   | 135 | 3  |      |
| 08JH425 20  | 592  | 572  | 1.04 |         |         | 0.0700  | 0.0053  | 0.2031  | 0.0146  |         |         |      |     |     |    |     |   | 134 | 3  |      |
| 08JH425 21  | 193  | 262  | 0.74 |         |         | 0.0662  | 0.0057  | 0.1781  | 0.0145  |         |         |      |     |     |    |     |   | 124 | 3  |      |
| 08JH425 22  | 280  | 338  | 0.83 |         |         | 0.0565  | 0.0026  | 0.1642  | 0.0067  |         |         |      |     |     |    |     |   | 135 | 3  |      |
| 08JH425 23  | 187  | 192  | 0.97 |         |         | 0.0711  | 0.0167  | 0.1823  | 0.0418  |         |         |      |     |     |    |     |   | 119 | 6  |      |
| 08JH425 24  | 450  | 433  | 1.04 |         |         | 0.0552  | 0.0025  | 0.1529  | 0.0063  |         |         |      |     |     |    |     |   | 128 | 3  |      |
|             |      |      |      |         |         |         |         |         |         |         |         |      |     |     |    |     |   |     |    |      |
| NY19-01     | 122  | 154  | 0.79 | 0.05189 | 0.01132 | 0.14780 | 0.03199 | 0.02069 | 0.00068 | 0.00503 | 0.00096 | 281  | 409 | 140 | 28 | 132 | 4 | 101 | 19 | 0.94 |
| NY19-02     | 253  | 197  | 1.29 | 0.04864 | 0.01345 | 0.13676 | 0.03745 | 0.02042 | 0.00090 | 0.00389 | 0.00095 | 131  | 469 | 130 | 33 | 130 | 6 | 78  | 19 | 1.00 |
| NY19-03     | 277  | 304  | 0.91 | 0.04832 | 0.00542 | 0.13467 | 0.01503 | 0.02023 | 0.00042 | 0.00366 | 0.00055 | 115  | 239 | 128 | 13 | 129 | 3 | 74  | 11 | 1.01 |
| NY19-04     | 526  | 336  | 1.57 | 0.05056 | 0.00489 | 0.14332 | 0.01378 | 0.02059 | 0.00044 | 0.00260 | 0.00029 | 221  | 221 | 136 | 12 | 131 | 3 | 52  | 6  | 0.96 |
| NY19-06     | 181  | 120  | 1.51 | 0.04788 | 0.01314 | 0.13454 | 0.03676 | 0.02040 | 0.00066 | 0.00456 | 0.00087 | 93   | 456 | 128 | 33 | 130 | 4 | 92  | 18 | 1.02 |
| NY19-07     | 79   | 58   | 1.36 | 0.05014 | 0.02444 | 0.14199 | 0.06896 | 0.02055 | 0.00094 | 0.00513 | 0.00117 | 201  | 849 | 135 | 61 | 131 | 6 | 103 | 24 | 0.97 |
| NY19-08     | 372  | 160  | 2.33 | 0.04847 | 0.01447 | 0.13716 | 0.04066 | 0.02056 | 0.00084 | 0.00384 | 0.00106 | 1222 |     |     |    |     |   |     |    |      |



|         |      |     |      |         |         |         |         |         |         |         |         |     |      |     |    |     |   |     |     |      |
|---------|------|-----|------|---------|---------|---------|---------|---------|---------|---------|---------|-----|------|-----|----|-----|---|-----|-----|------|
| NY19-13 | 97   | 107 | 0.91 | 0.04745 | 0.01293 | 0.13734 | 0.03727 | 0.02100 | 0.00065 | 0.01125 | 0.00314 | 72  | 451  | 131 | 33 | 134 | 4 | 226 | 63  | 1.02 |
| NY19-14 | 304  | 188 | 1.61 | 0.05014 | 0.01045 | 0.14304 | 0.02957 | 0.02071 | 0.00069 | 0.00314 | 0.00062 | 201 | 383  | 136 | 26 | 132 | 4 | 63  | 12  | 0.97 |
| NY19-15 | 64   | 49  | 1.32 | 0.04849 | 0.03472 | 0.13924 | 0.09929 | 0.02084 | 0.00142 | 0.00581 | 0.00203 | 123 | 1079 | 132 | 88 | 133 | 9 | 117 | 41  | 1.01 |
| NY19-16 | 308  | 435 | 0.71 | 0.04718 | 0.00424 | 0.13518 | 0.01207 | 0.02080 | 0.00046 | 0.00439 | 0.00115 | 58  | 199  | 129 | 11 | 133 | 3 | 89  | 23  | 1.03 |
| NY19-17 | 60   | 52  | 1.15 | 0.04881 | 0.02619 | 0.13742 | 0.07346 | 0.02043 | 0.00101 | 0.00538 | 0.00156 | 139 | 940  | 131 | 66 | 130 | 6 | 108 | 31  | 0.99 |
| NY19-18 | 362  | 422 | 0.86 | 0.04959 | 0.00926 | 0.13909 | 0.02557 | 0.02035 | 0.00081 | 0.01014 | 0.01138 | 176 | 346  | 132 | 23 | 130 | 5 | 204 | 228 | 0.98 |
| NY19-19 | 66   | 54  | 1.23 | 0.04897 | 0.03223 | 0.13927 | 0.09127 | 0.02064 | 0.00133 | 0.00361 | 0.00170 | 146 | 1034 | 132 | 81 | 132 | 8 | 73  | 34  | 1.00 |
| NY19-20 | 122  | 111 | 1.1  | 0.04798 | 0.01533 | 0.13720 | 0.04359 | 0.02074 | 0.00080 | 0.00544 | 0.00197 | 98  | 533  | 131 | 39 | 132 | 5 | 110 | 40  | 1.01 |
| NY20-01 | 192  | 176 | 1.09 | 0.04896 | 0.01347 | 0.14882 | 0.04063 | 0.02206 | 0.00085 | 0.00972 | 0.00498 | 146 | 468  | 141 | 36 | 141 | 5 | 196 | 100 | 1.00 |
| NY20-02 | 322  | 197 | 1.63 | 0.04640 | 0.02287 | 0.13491 | 0.06590 | 0.02110 | 0.00145 | 0.00819 | 0.00507 | 18  | 823  | 129 | 59 | 135 | 9 | 165 | 102 | 1.05 |
| NY20-03 | 188  | 149 | 1.26 | 0.04896 | 0.01117 | 0.14023 | 0.03183 | 0.02078 | 0.00062 | 0.00503 | 0.00110 | 146 | 399  | 133 | 28 | 133 | 4 | 101 | 22  | 1.00 |
| NY20-04 | 1435 | 555 | 2.59 | 0.04791 | 0.00473 | 0.13115 | 0.01283 | 0.01986 | 0.00048 | 0.00399 | 0.00088 | 95  | 220  | 125 | 12 | 127 | 3 | 80  | 18  | 1.02 |
| NY20-05 | 165  | 137 | 1.2  | 0.04747 | 0.01655 | 0.13669 | 0.04737 | 0.02089 | 0.00092 | 0.00314 | 0.00079 | 73  | 576  | 130 | 42 | 133 | 6 | 63  | 16  | 1.02 |
| NY20-06 | 77   | 62  | 1.25 | 0.04660 | 0.02267 | 0.13564 | 0.06578 | 0.02111 | 0.00092 | 0.00780 | 0.00271 | 29  | 834  | 129 | 59 | 135 | 6 | 157 | 54  | 1.05 |
| NY20-07 | 415  | 440 | 0.94 | 0.04550 | 0.00344 | 0.12826 | 0.00970 | 0.02045 | 0.00038 | 0.00337 | 0.00061 | -28 | 165  | 123 | 9  | 130 | 2 | 68  | 12  | 1.06 |
| NY20-08 | 323  | 219 | 1.47 | 0.04958 | 0.00807 | 0.13882 | 0.02243 | 0.02031 | 0.00054 | 0.01032 | 0.00671 | 175 | 316  | 132 | 20 | 130 | 3 | 208 | 134 | 0.98 |
| NY20-09 | 204  | 197 | 1.04 | 0.05003 | 0.00786 | 0.13811 | 0.02157 | 0.02002 | 0.00049 | 0.00563 | 0.00193 | 196 | 317  | 131 | 19 | 128 | 3 | 113 | 39  | 0.98 |
| NY20-10 | 331  | 250 | 1.32 | 0.04912 | 0.00573 | 0.13745 | 0.01597 | 0.02029 | 0.00043 | 0.00514 | 0.00143 | 154 | 253  | 131 | 14 | 129 | 3 | 104 | 29  | 0.98 |
| NY20-11 | 136  | 89  | 1.53 | 0.04879 | 0.03168 | 0.13589 | 0.08775 | 0.02020 | 0.00145 | 0.00672 | 0.00254 | 138 | 1034 | 129 | 78 | 129 | 9 | 135 | 51  | 1.00 |
| NY20-12 | 160  | 120 | 1.34 | 0.04886 | 0.02048 | 0.13965 | 0.05817 | 0.02072 | 0.00104 | 0.00652 | 0.00284 | 141 | 716  | 133 | 52 | 132 | 7 | 131 | 57  | 0.99 |
| NY20-13 | 295  | 295 | 1    | 0.04989 | 0.00918 | 0.14243 | 0.02591 | 0.02071 | 0.00071 | 0.00454 | 0.00123 | 190 | 344  | 135 | 23 | 132 | 4 | 92  | 25  | 0.98 |
| NY20-14 | 112  | 103 | 1.09 | 0.05038 | 0.01881 | 0.14158 | 0.05257 | 0.02038 | 0.00090 | 0.00566 | 0.00149 | 213 | 649  | 134 | 47 | 130 | 6 | 114 | 30  | 0.97 |
| NY20-15 | 307  | 207 | 1.48 | 0.04561 | 0.01096 | 0.13247 | 0.03162 | 0.02107 | 0.00074 | 0.00331 | 0.00085 | -23 | 391  | 126 | 28 | 134 | 5 | 67  | 17  | 1.06 |
| NY20-16 | 238  | 299 | 0.79 | 0.04637 | 0.00889 | 0.13397 | 0.02538 | 0.02096 | 0.00076 | 0.00129 | 0.00025 | 17  | 329  | 128 | 23 | 134 | 5 | 26  | 5   | 1.05 |
| NY20-17 | 98   | 120 | 0.82 | 0.05105 | 0.01590 | 0.14598 | 0.04520 | 0.02073 | 0.00081 | 0.00723 | 0.00339 | 243 | 544  | 138 | 40 | 132 | 5 | 146 | 68  | 0.96 |
| NY20-19 | 183  | 141 | 1.3  | 0.04885 | 0.01297 | 0.14092 | 0.03720 | 0.02092 | 0.00075 | 0.00231 | 0.00045 | 141 | 453  | 134 | 33 | 133 | 5 | 47  | 9   | 0.99 |
| NY21-01 | 392  | 379 | 1.04 | 0.05069 | 0.00809 | 0.14349 | 0.02237 | 0.02054 | 0.00081 | 0.00036 | 0.00006 | 227 | 323  | 136 | 20 | 131 | 5 | 7   | 1   | 0.96 |
| NY21-02 | 446  | 348 | 1.28 | 0.04981 | 0.00486 | 0.13797 | 0.01344 | 0.02009 | 0.00041 | 0.00409 | 0.00072 | 186 | 222  | 131 | 12 | 128 | 3 | 82  | 14  | 0.98 |
| NY21-03 | 524  | 545 | 0.96 | 0.04640 | 0.00333 | 0.13228 | 0.00950 | 0.02067 | 0.00039 | 0.00335 | 0.00046 | 18  | 159  | 126 | 9  | 132 | 2 | 68  | 9   | 1.05 |
| NY21-04 | 482  | 401 | 1.2  | 0.04685 | 0.00421 | 0.13310 | 0.01195 | 0.02060 | 0.00040 | 0.00466 | 0.00097 | 42  | 199  | 127 | 11 | 131 | 3 | 94  | 20  | 1.03 |
| NY21-05 | 151  | 120 | 1.26 | 0.04792 | 0.01925 | 0.13524 | 0.05390 | 0.02048 | 0.00111 | 0.00079 | 0.00020 | 95  | 674  | 129 | 48 | 131 | 7 | 16  | 4   | 1.02 |
| NY21-06 | 489  | 410 | 1.19 | 0.04775 | 0.00414 | 0.13898 | 0.01204 | 0.02111 | 0.00041 | 0.00484 | 0.00103 | 87  | 195  | 132 | 11 | 135 | 3 | 98  | 21  | 1.02 |
| NY21-07 | 283  | 247 | 1.15 | 0.04731 | 0.01002 | 0.13473 | 0.02824 | 0.02064 | 0.00075 | 0.00136 | 0.00023 | 65  | 365  | 128 | 25 | 132 | 5 | 27  | 5   | 1.03 |
| NY21-08 | 236  | 318 | 0.74 | 0.04886 | 0.00537 | 0.13858 | 0.01517 | 0.02058 | 0.00043 | 0.00580 | 0.00173 | 141 | 243  | 132 | 14 | 131 | 3 | 117 | 35  | 0.99 |
| NY21-09 | 302  | 220 | 1.37 | 0.04953 | 0.02162 | 0.13895 | 0.05999 | 0.02032 | 0.00140 | 0.00258 | 0.00159 | 173 | 757  | 132 | 53 | 130 | 9 | 52  | 32  | 0.98 |
| NY21-10 | 178  | 114 | 1.56 | 0.04843 | 0.02119 | 0.13880 | 0.06043 | 0.02083 | 0.00098 | 0.00781 | 0.00497 | 120 | 751  | 132 | 54 | 133 | 6 | 157 | 100 | 1.01 |
| NY21-11 | 363  | 239 | 1.52 | 0.04865 | 0.00795 | 0.13571 | 0.02207 | 0.02026 | 0.00049 | 0.00784 | 0.00266 | 131 | 307  | 129 | 20 | 129 | 3 | 158 | 53  | 1.00 |
| NY21-12 | 232  | 271 | 0.85 | 0.04865 | 0.00605 | 0.14085 | 0.01746 | 0.02100 | 0.00044 | 0.00411 | 0.00074 | 131 | 258  | 134 | 16 | 134 | 3 | 83  | 15  | 1.00 |
| NY21-14 | 719  | 476 | 1.51 | 0.04930 | 0.00555 | 0.13855 | 0.01548 | 0.02036 | 0.00048 | 0.00652 | 0.00308 | 162 | 250  | 132 | 14 | 130 | 3 | 131 | 62  | 0.98 |
| NY21-15 | 114  | 79  | 1.44 | 0.04826 | 0.03053 | 0.13799 | 0.08695 | 0.02075 | 0.00127 | 0.00692 | 0.00371 | 112 | 996  | 131 | 78 | 132 | 8 | 139 | 74  | 1.01 |
| NY21-16 | 85   | 71  | 1.2  | 0.04938 | 0.02465 | 0.13951 | 0.06938 | 0.02049 | 0.00096 | 0.00860 | 0.00328 | 166 | 865  | 133 | 62 | 131 | 6 | 173 | 66  | 0.98 |
| NY21-17 | 174  | 129 | 1.35 | 0.04973 | 0.01483 | 0.14143 | 0.04198 | 0.02063 | 0.00072 | 0.00452 | 0.00151 | 182 | 512  | 134 | 37 | 132 | 5 | 91  | 30  | 0.99 |
| NY22-01 | 494  | 528 | 0.94 | 0.04824 | 0.00520 | 0.14148 | 0.01513 | 0.02126 | 0.00052 | 0.00299 | 0.00058 | 111 | 235  | 134 | 13 | 136 | 3 | 60  | 12  | 1.01 |
| NY22-02 | 292  | 169 | 1.73 | 0.04981 | 0.02216 | 0.14474 | 0.06389 | 0.02109 | 0.00125 | 0.00683 | 0.00439 | 186 | 778  | 137 | 57 | 135 | 8 | 138 | 88  | 0.99 |
| NY22-03 | 277  | 263 | 1.05 | 0.04977 | 0.00671 | 0.13628 | 0.01833 | 0.01986 | 0.00043 | 0.00343 | 0.00072 | 184 | 281  | 130 | 16 | 127 | 3 | 69  | 15  | 0.98 |
| NY22-04 | 141  | 140 | 1    | 0.04770 | 0.01360 | 0.13395 | 0.03804 | 0.02037 | 0.00065 | 0.01368 | 0.00970 | 84  | 475  | 128 | 34 | 130 | 4 | 275 | 193 | 1.02 |
| NY22-05 | 701  | 590 | 1.19 | 0.05098 | 0.00742 | 0.14408 | 0.02050 | 0.02048 | 0.00075 | 0.00072 | 0.00011 | 240 | 302  | 137 | 18 | 131 | 5 | 15  | 2   | 0.96 |
| NY22-06 | 137  | 159 | 0.86 | 0.04864 | 0.01110 | 0.13364 | 0.03039 | 0.01993 | 0.00054 | 0.00808 | 0.00337 | 131 | 399  | 127 | 27 | 127 | 3 | 163 | 68  | 1.00 |
| NY22-07 | 356  | 206 | 1.73 | 0.04718 | 0.00834 | 0.13301 | 0.02344 | 0.02045 | 0.00049 | 0.00785 | 0.00335 | 58  | 313  | 127 | 21 | 130 | 3 | 158 | 67  | 1.02 |
| NY22-08 | 175  | 183 | 0.95 | 0.04655 | 0.01189 | 0.13313 | 0.03381 | 0.02075 | 0.00067 | 0.02458 | 0.05229 | 26  | 419  | 127 | 30 | 132 | 4 | 491 | ### | 1.04 |
| NY22-09 | 352  | 275 | 1.28 | 0.04713 | 0.01200 | 0.13124 | 0.03318 | 0.02020 | 0.00075 | 0.01002 | 0.00988 | 56  | 420  | 125 | 30 | 129 | 5 | 202 | 198 | 1.03 |
| NY22-10 | 256  | 262 | 0.98 | 0.04929 | 0.00739 | 0.13907 | 0.02075 | 0.02047 | 0.00051 | 0.00334 | 0.00082 | 162 | 302  | 132 | 18 | 131 | 3 | 67  | 17  | 0.99 |
| NY22-11 | 836  | 660 | 1.27 | 0.04575 | 0.00301 | 0.12966 | 0.00857 | 0.02056 | 0.00038 | 0.00384 | 0.00070 | -15 | 145  | 124 | 8  | 131 | 2 | 77  | 14  | 1.06 |
| NY22-12 | 247  | 197 | 1.25 | 0.04974 | 0.01332 | 0.13792 | 0.03666 | 0.02011 | 0.00078 | 0.00215 | 0.00035 | 183 | 466  | 131 | 33 | 128 | 5 | 43  | 7   | 0.98 |
| NY22-14 | 173  | 194 | 0.89 | 0.04668 | 0.02256 | 0.13334 | 0.06395 | 0.02072 | 0.00128 | 0.00322 | 0.00158 | 33  | 828  | 127 | 57 | 132 | 8 | 65  | 32  | 1.04 |
| NY22-16 | 179  | 144 | 1.24 | 0.05072 | 0.01250 | 0.14534 | 0.03568 | 0.02079 | 0.00060 | 0.00693 | 0.00263 | 228 | 441  | 138 | 32 | 133 | 4 | 140 | 53  | 0.96 |
| NY22-17 | 451  | 417 | 1.08 | 0.04640 | 0.00470 | 0.12937 | 0.01308 | 0.02022 | 0.00040 | 0.00480 | 0.00142 | 18  | 212  | 124 | 12 | 129 | 3 | 97  | 29  | 1.04 |
| NY22-18 | 134  | 194 | 0.69 | 0.04811 | 0.01941 | 0.13722 | 0.05494 | 0.02072 | 0.00112 | 0.00536 | 0.00408 | 105 | 679  | 131 | 49 | 132 | 7 | 108 | 82  | 1.01 |
| NY22-19 | 327  | 311 | 1.05 | 0.04835 | 0.02084 | 0.13298 | 0.05690 | 0.01993 | 0.00127 | 0.00855 | 0.01608 | 116 | 736  | 127 | 51 | 127 | 8 | 172 | 322 | 1.00 |
| NY22-20 | 277  | 342 | 0.81 | 0.04630 | 0.00914 | 0.13412 | 0.02621 | 0.02101 | 0.00069 | 0.00793 | 0.00523 | 13  | 338  | 128 | 23 | 134 | 4 | 160 | 105 | 1.05 |

N19, Tong'an (Guo et al., 2012). Out of the map



|            |     |      |      |        |        |        |        |     |   |
|------------|-----|------|------|--------|--------|--------|--------|-----|---|
| 08JH334 15 | 2   | 4    | 0.48 | 0.1657 | 0.0248 | 0.0261 | 0.0012 | 166 | 8 |
| 08JH334 16 | 8   | 10   | 0.75 | 0.1741 | 0.0066 | 0.0236 | 0.0006 | 150 | 4 |
| 08JH334 17 | 3   | 7    | 0.42 | 0.1546 | 0.0099 | 0.0244 | 0.0006 | 155 | 4 |
| 08JH334 18 | 24  | 25   | 0.96 | 0.1806 | 0.0058 | 0.0242 | 0.0005 | 154 | 3 |
| 08JH334 19 | 18  | 30   | 0.62 | 0.1868 | 0.0036 | 0.0259 | 0.0005 | 165 | 3 |
| 08JH334 20 | 12  | 16   | 0.73 | 0.1670 | 0.0054 | 0.0242 | 0.0005 | 154 | 3 |
| 08JH334 21 | 22  | 29   | 0.74 | 0.1751 | 0.0107 | 0.0254 | 0.0005 | 161 | 3 |
| 08JH334 22 | 27  | 38   | 0.72 | 0.1767 | 0.0139 | 0.0241 | 0.0006 | 154 | 4 |
| 08JH334 23 | 12  | 17   | 0.72 | 0.1652 | 0.0159 | 0.0237 | 0.0006 | 151 | 4 |
| 08JH334 24 | 3   | 7    | 0.49 | 0.1547 | 0.0104 | 0.0244 | 0.0008 | 155 | 5 |
|            |     |      |      |        |        |        |        |     |   |
| 08JH351 01 | 105 | 121  | 0.87 | 0.1559 | 0.0100 | 0.0219 | 0.0006 | 139 | 4 |
| 08JH351 02 | 102 | 158  | 0.64 | 0.1513 | 0.0121 | 0.0214 | 0.0008 | 137 | 5 |
| 08JH351 03 | 133 | 194  | 0.68 | 0.1492 | 0.0075 | 0.0218 | 0.0005 | 139 | 3 |
| 08JH351 04 | 245 | 445  | 0.55 | 0.1526 | 0.0033 | 0.0222 | 0.0003 | 142 | 2 |
| 08JH351 05 | 303 | 373  | 0.81 | 0.1644 | 0.0098 | 0.0219 | 0.0006 | 140 | 4 |
| 08JH351 06 | 438 | 1143 | 0.38 | 0.1707 | 0.0061 | 0.0233 | 0.0004 | 149 | 3 |
| 08JH351 07 | 260 | 322  | 0.81 | 0.1114 | 0.0072 | 0.0150 | 0.0005 | 96  | 3 |
| 08JH351 09 | 320 | 595  | 0.54 | 0.1529 | 0.0033 | 0.0219 | 0.0003 | 140 | 2 |
| 08JH351 10 | 378 | 343  | 1.10 | 0.1287 | 0.0165 | 0.0152 | 0.0005 | 97  | 3 |
| 08JH351 11 | 261 | 344  | 0.76 | 0.1597 | 0.0093 | 0.0214 | 0.0006 | 136 | 4 |
| 08JH351 12 | 361 | 379  | 0.95 | 0.1582 | 0.0083 | 0.0168 | 0.0005 | 107 | 3 |
| 08JH351 13 | 397 | 335  | 1.19 | 0.1595 | 0.0080 | 0.0160 | 0.0005 | 102 | 3 |
| 08JH351 14 | 405 | 384  | 1.05 | 0.1312 | 0.0085 | 0.0149 | 0.0005 | 96  | 3 |
| 08JH351 15 | 496 | 495  | 1.00 | 0.1216 | 0.0144 | 0.0145 | 0.0004 | 92  | 3 |
| 08JH351 16 | 391 | 366  | 1.07 | 0.1672 | 0.0150 | 0.0215 | 0.0010 | 137 | 6 |
| 08JH351 17 | 367 | 402  | 0.91 | 0.1021 | 0.0043 | 0.0145 | 0.0003 | 93  | 2 |
| 08JH351 18 | 233 | 333  | 0.70 | 0.1510 | 0.0062 | 0.0219 | 0.0004 | 140 | 3 |
| 08JH351 19 | 96  | 99   | 0.97 | 0.1600 | 0.0338 | 0.0185 | 0.0009 | 118 | 5 |
| 08JH351 20 | 172 | 186  | 0.93 | 0.1378 | 0.0098 | 0.0175 | 0.0006 | 112 | 4 |
| 08JH351 21 | 274 | 238  | 1.15 | 0.1158 | 0.0087 | 0.0147 | 0.0005 | 94  | 3 |
| 08JH351 22 | 662 | 617  | 1.07 | 0.1156 | 0.0063 | 0.0139 | 0.0004 | 89  | 2 |
| 08JH351 23 | 373 | 288  | 1.29 | 0.2190 | 0.0409 | 0.0147 | 0.0007 | 94  | 4 |
| 08JH351 24 | 215 | 577  | 0.37 | 0.1440 | 0.0141 | 0.0224 | 0.0008 | 143 | 5 |
| 08JH351 25 | 352 | 277  | 1.27 | 0.1143 | 0.0136 | 0.0140 | 0.0008 | 89  | 5 |

N20 Pinghe (Guo et al., 2012). Out of the map

|                       |                |                |                 |                   |                   |                   |                   |                |              |
|-----------------------|----------------|----------------|-----------------|-------------------|-------------------|-------------------|-------------------|----------------|--------------|
| 08JH229 01            | 556            | 766            | 0.73            | 0.0492            | 0.0008            | 0.1719            | 0.0025            | 161            | 2            |
| 08JH229 02            | 1149           | 545            | 2.11            | 0.0504            | 0.0009            | 0.1715            | 0.0028            | 157            | 2            |
| 08JH229 03            | 213            | 388            | 0.55            | 0.0504            | 0.0013            | 0.1667            | 0.0039            | 153            | 2            |
| 08JH229 04            | 126            | 227            | 0.56            | 0.0484            | 0.0018            | 0.1621            | 0.0057            | 155            | 2            |
| 08JH229 05            | 146            | 270            | 0.54            | 0.0493            | 0.0023            | 0.1628            | 0.0071            | 153            | 3            |
| 08JH229 06            | 149            | 296            | 0.50            | 0.0514            | 0.0024            | 0.1729            | 0.0073            | 155            | 3            |
| 08JH229 08            | 169            | 285            | 0.59            | 0.0491            | 0.0031            | 0.1694            | 0.0102            | 159            | 3            |
| 08JH229 09            | 102            | 164            | 0.62            | 0.0538            | 0.0037            | 0.1686            | 0.0107            | 145            | 4            |
| 08JH229 10            | 396            | 537            | 0.74            | 0.0542            | 0.0027            | 0.1817            | 0.0081            | 155            | 3            |
| 08JH229 11            | 208            | 341            | 0.61            | 0.0497            | 0.0013            | 0.1666            | 0.0040            | 155            | 2            |
| 08JH229 12            | 125            | 248            | 0.50            | 0.0506            | 0.0027            | 0.1706            | 0.0085            | 156            | 4            |
| 08JH229 13            | 328            | 447            | 0.73            | 0.0513            | 0.0014            | 0.1764            | 0.0045            | 159            | 2            |
| 08JH229 14            | 274            | 455            | 0.60            | 0.0506            | 0.0015            | 0.1770            | 0.0047            | 161            | 2            |
| 08JH229 15            | 229            | 457            | 0.50            | 0.0499            | 0.0025            | 0.1567            | 0.0076            | 145            | 2            |
| 08JH229 16            | 137            | 272            | 0.50            | 0.0525            | 0.0021            | 0.1737            | 0.0065            | 153            | 3            |
| 08JH229 17            | 111            | 210            | 0.53            | 0.0511            | 0.0019            | 0.1748            | 0.0059            | 158            | 2            |
| 08JH229 18            | 153            | 269            | 0.57            | 0.0508            | 0.0017            | 0.1789            | 0.0056            | 163            | 2            |
| 08JH229 19            | 178            | 264            | 0.67            | 0.0517            | 0.0015            | 0.1761            | 0.0048            | 157            | 2            |
| 08JH229 20            | 470            | 503            | 0.94            | 0.0512            | 0.0013            | 0.1808            | 0.0041            | 163            | 2            |
| 08JH229 21            | 138            | 276            | 0.50            | 0.0510            | 0.0016            | 0.1763            | 0.0051            | 160            | 2            |
| 08JH229 22            | 132            | 250            | 0.53            | 0.0506            | 0.0021            | 0.1751            | 0.0068            | 160            | 3            |
| 08JH229 23            | 115            | 213            | 0.54            | 0.0528            | 0.0029            | 0.1797            | 0.0092            | 157            | 4            |
| 08JH229 24            | 265            | 380            | 0.70            | 0.0506            | 0.0016            | 0.1701            | 0.0049            | 155            | 2            |
|                       |                |                |                 |                   |                   |                   |                   |                |              |
| <del>08JH239 01</del> | <del>232</del> | <del>451</del> | <del>0.52</del> | <del>0.2806</del> | <del>0.0061</del> | <del>0.0407</del> | <del>0.0008</del> | <del>257</del> | <del>5</del> |
| 08JH239 02            | 338            | 614            | 0.55            | 0.1550            | 0.0032            | 0.0212            | 0.0004            | 135            | 2            |
| 08JH239 04            | 367            | 365            | 1.00            | 0.1835            | 0.0084            | 0.0195            | 0.0006            | 125            | 3            |
| 08JH239 05            | 366            | 449            | 0.82            | 0.1817            | 0.0094            | 0.0199            | 0.0006            | 127            | 4            |
| 08JH239 06            | 163            | 204            | 0.80            | 0.1182            | 0.0221            | 0.0164            | 0.0007            | 105            | 5            |
| 08JH239 07            | 215            | 382            | 0.56            | 0.1511            | 0.0044            | 0.0218            | 0.0004            | 139            | 3            |
| 08JH239 08            | 142            | 220            | 0.65            | 0.1192            | 0.0049            | 0.0160            | 0.0004            | 102            | 2            |
| 08JH239 09            | 174            | 210            | 0.83            | 0.1447            | 0.0059            | 0.0203            | 0.0005            | 129            | 3            |
| 08JH239 10            | 174            | 224            | 0.78            | 0.1726            | 0.0084            | 0.0223            | 0.0006            | 142            | 4            |
| 08JH239 11            | 115            | 189            | 0.61            | 0.1096            | 0.0145            | 0.0155            | 0.0006            | 99             | 4            |
| 08JH239 12            | 134            | 235            | 0.57            | 0.1211            | 0.0115            | 0.0163            | 0.0007            | 104            | 5            |
| 08JH239 13            | 176            | 260            | 0.68            | 0.1018            | 0.0103            | 0.0160            | 0.0005            | 103            | 3            |
| 08JH239 14            | 68             | 107            | 0.64            | 0.1065            | 0.0139            | 0.0168            | 0.0008            | 107            | 5            |
| 08JH239 15            | 224            | 284            | 0.79            | 0.1467            | 0.0049            | 0.0214            | 0.0005            | 136            | 3            |
| 08JH239 16            | 233            | 275            | 0.84            | 0.1556            | 0.0054            | 0.0223            | 0.0005            | 142            | 3            |
| 08JH239 17            | 218            | 421            | 0.52            | 0.1475            | 0.0046            | 0.0217            | 0.0005            | 139            | 3            |
| <del>08JH239 18</del> | <del>115</del> | <del>157</del> | <del>0.73</del> | <del>0.1822</del> | <del>0.0749</del> | <del>0.0164</del> | <del>0.0014</del> | <del>105</del> | <del>9</del> |
| 08JH239 19            | 151            | 193            | 0.78            | 0.1216            | 0.0095            | 0.0164            | 0.0006            | 105            | 4            |



|             |      |      |      |        |        |        |        |     |   |
|-------------|------|------|------|--------|--------|--------|--------|-----|---|
| 08JH239 20  | 193  | 333  | 0.58 | 0.1412 | 0.0048 | 0.0216 | 0.0005 | 138 | 3 |
| 08JH239 22  | 177  | 258  | 0.69 | 0.1199 | 0.0056 | 0.0175 | 0.0004 | 112 | 3 |
| 08JH239 24  | 182  | 262  | 0.70 | 0.1178 | 0.0089 | 0.0186 | 0.0007 | 119 | 4 |
| 08JH 439 01 | 123  | 142  | 0.87 | 0.0989 | 0.0140 | 0.0145 | 0.0005 | 93  | 3 |
| 08JH 439 02 | 243  | 396  | 0.61 | 0.1053 | 0.0033 | 0.0148 | 0.0003 | 95  | 2 |
| 08JH 439 04 | 510  | 794  | 0.64 | 0.1001 | 0.0017 | 0.0150 | 0.0003 | 96  | 2 |
| 08JH 439 05 | 176  | 177  | 0.99 | 0.1073 | 0.0087 | 0.0143 | 0.0005 | 91  | 3 |
| 08JH 439 06 | 123  | 200  | 0.62 | 0.1026 | 0.0048 | 0.0147 | 0.0003 | 94  | 2 |
| 08JH 439 07 | 125  | 154  | 0.81 | 0.1080 | 0.0079 | 0.0152 | 0.0004 | 97  | 3 |
| 08JH 439 08 | 115  | 173  | 0.67 | 0.0986 | 0.0077 | 0.0146 | 0.0004 | 93  | 3 |
| 08JH 439 09 | 133  | 132  | 1.01 | 0.1059 | 0.0100 | 0.0151 | 0.0005 | 96  | 3 |
| 08JH 439 10 | 132  | 149  | 0.89 | 0.1109 | 0.0124 | 0.0154 | 0.0006 | 99  | 4 |
| 08JH 439 11 | 554  | 1012 | 0.55 | 0.1086 | 0.0031 | 0.0153 | 0.0003 | 98  | 2 |
| 08JH 439 12 | 96   | 145  | 0.66 | 0.1028 | 0.0081 | 0.0150 | 0.0004 | 96  | 3 |
| 08JH 439 13 | 214  | 172  | 1.24 | 0.1319 | 0.0209 | 0.0144 | 0.0009 | 92  | 5 |
| 08JH 439 14 | 85   | 135  | 0.63 | 0.1017 | 0.0088 | 0.0144 | 0.0004 | 92  | 3 |
| 08JH 439 15 | 105  | 84   | 1.25 | 0.1281 | 0.0289 | 0.0153 | 0.0007 | 98  | 4 |
| 08JH 439 16 | 99   | 176  | 0.56 | 0.1015 | 0.0052 | 0.0149 | 0.0003 | 95  | 2 |
| 08JH 439 17 | 104  | 121  | 0.85 | 0.1088 | 0.0091 | 0.0149 | 0.0004 | 95  | 3 |
| 08JH 439 18 | 244  | 296  | 0.82 | 0.1043 | 0.0098 | 0.0142 | 0.0004 | 91  | 2 |
| 08JH 439 19 | 1020 | 1487 | 0.69 | 0.1131 | 0.0041 | 0.0153 | 0.0003 | 98  | 2 |
| 08JH 439 20 | 1121 | 2065 | 0.54 | 0.1042 | 0.0017 | 0.0152 | 0.0003 | 97  | 2 |
| 08JH 439 21 | 271  | 438  | 0.62 | 0.1003 | 0.0044 | 0.0140 | 0.0003 | 90  | 2 |
| 08JH 439 22 | 441  | 679  | 0.65 | 0.1002 | 0.0120 | 0.0144 | 0.0004 | 92  | 3 |
| 08JH 439 23 | 135  | 176  | 0.76 | 0.1009 | 0.0092 | 0.0145 | 0.0005 | 93  | 3 |
| 08JH 439 24 | 66   | 108  | 0.61 | 0.1111 | 0.0137 | 0.0143 | 0.0006 | 92  | 4 |

**Guangdong province**  
N21, Fengshun, (Guo et al., 2012). Out of the map

|           |      |      |      |        |        |        |        |     |   |
|-----------|------|------|------|--------|--------|--------|--------|-----|---|
| 09GF-5 01 | 116  | 134  | 0.86 | 0.1756 | 0.0246 | 0.0249 | 0.0008 | 158 | 5 |
| 09GF-5 02 | 139  | 252  | 0.55 | 0.1521 | 0.0114 | 0.0216 | 0.0004 | 138 | 3 |
| 09GF-5 03 | 112  | 210  | 0.53 | 0.1661 | 0.0084 | 0.0238 | 0.0005 | 151 | 3 |
| 09GF-5 04 | 189  | 237  | 0.80 | 0.1539 | 0.0121 | 0.0217 | 0.0004 | 138 | 3 |
| 09GF-5 05 | 66   | 103  | 0.64 | 0.1544 | 0.0101 | 0.0233 | 0.0006 | 148 | 3 |
| 09GF-5 06 | 117  | 141  | 0.83 | 0.1833 | 0.0173 | 0.0238 | 0.0005 | 151 | 3 |
| 09GF-5 07 | 1497 | 2146 | 0.70 | 0.1651 | 0.0029 | 0.0239 | 0.0003 | 152 | 2 |
| 09GF-5 08 | 278  | 362  | 0.77 | 0.1608 | 0.0071 | 0.0227 | 0.0004 | 145 | 3 |
| 09GF-5 09 | 241  | 347  | 0.69 | 0.1613 | 0.0058 | 0.0223 | 0.0004 | 142 | 2 |
| 09GF-5 10 | 290  | 539  | 0.54 | 0.1575 | 0.0080 | 0.0219 | 0.0003 | 139 | 2 |
| 09GF-5 11 | 252  | 308  | 0.82 | 0.1596 | 0.0058 | 0.0231 | 0.0004 | 147 | 2 |
| 09GF-5 12 | 164  | 281  | 0.59 | 0.1579 | 0.0058 | 0.0231 | 0.0004 | 147 | 2 |
| 09GF-5 13 | 267  | 359  | 0.74 | 0.1561 | 0.0060 | 0.0230 | 0.0004 | 147 | 2 |
| 09GF-5 14 | 183  | 252  | 0.73 | 0.1632 | 0.0074 | 0.0229 | 0.0005 | 146 | 3 |
| 09GF-5 15 | 160  | 224  | 0.71 | 0.1559 | 0.0083 | 0.0227 | 0.0005 | 145 | 3 |
| 09GF-5 16 | 426  | 603  | 0.71 | 0.1613 | 0.0044 | 0.0230 | 0.0003 | 146 | 2 |
| 09GF-5 17 | 59   | 146  | 0.40 | 0.1725 | 0.0102 | 0.0254 | 0.0006 | 162 | 4 |
| 09GF-5 18 | 112  | 252  | 0.45 | 0.1666 | 0.0095 | 0.0231 | 0.0006 | 147 | 3 |
| 09GF-5 19 | 123  | 227  | 0.54 | 0.1517 | 0.0088 | 0.0235 | 0.0005 | 150 | 3 |
| 09GF-5 20 | 455  | 443  | 1.03 | 0.1632 | 0.0057 | 0.0231 | 0.0004 | 147 | 2 |
| 09GF-5 21 | 206  | 383  | 0.54 | 0.1595 | 0.0076 | 0.0225 | 0.0005 | 143 | 3 |
| 09GF-5 22 | 60   | 109  | 0.54 | 0.1568 | 0.0097 | 0.0226 | 0.0006 | 144 | 3 |
| 09GF-5 23 | 267  | 391  | 0.68 | 0.1568 | 0.0050 | 0.0231 | 0.0004 | 147 | 2 |
| 09GF-5 24 | 198  | 339  | 0.58 | 0.1684 | 0.0064 | 0.0248 | 0.0004 | 158 | 3 |
| 09GF-9 01 | 404  | 550  | 0.73 | 0.1581 | 0.0031 | 0.0226 | 0.0003 | 144 | 2 |
| 09GF-9 02 | 269  | 643  | 0.42 | 0.1589 | 0.0035 | 0.0229 | 0.0003 | 146 | 2 |
| 09GF-9 03 | 171  | 330  | 0.52 | 0.1590 | 0.0050 | 0.0225 | 0.0003 | 144 | 2 |
| 09GF-9 04 | 537  | 606  | 0.89 | 0.1556 | 0.0029 | 0.0226 | 0.0003 | 144 | 2 |
| 09GF-9 05 | 83   | 233  | 0.36 | 0.1769 | 0.0055 | 0.0242 | 0.0003 | 154 | 2 |
| 09GF-9 06 | 239  | 337  | 0.71 | 0.1564 | 0.0037 | 0.0228 | 0.0003 | 145 | 2 |
| 09GF-9 07 | 274  | 394  | 0.70 | 0.1504 | 0.0034 | 0.0229 | 0.0003 | 146 | 2 |
| 09GF-9 08 | 60   | 135  | 0.45 | 0.1695 | 0.0080 | 0.0250 | 0.0005 | 159 | 3 |
| 09GF-9 09 | 522  | 545  | 0.96 | 0.1544 | 0.0033 | 0.0223 | 0.0003 | 142 | 2 |
| 09GF-9 10 | 71   | 190  | 0.37 | 0.1558 | 0.0063 | 0.0221 | 0.0004 | 141 | 2 |
| 09GF-9 11 | 679  | 650  | 1.05 | 0.1554 | 0.0027 | 0.0226 | 0.0003 | 144 | 2 |
| 09GF-9 12 | 141  | 243  | 0.58 | 0.1727 | 0.0064 | 0.0252 | 0.0004 | 161 | 2 |
| 09GF-9 13 | 948  | 791  | 1.20 | 0.1560 | 0.0021 | 0.0225 | 0.0002 | 143 | 2 |
| 09GF-9 14 | 325  | 394  | 0.82 | 0.1567 | 0.0036 | 0.0224 | 0.0003 | 143 | 2 |
| 09GF-9 15 | 193  | 325  | 0.59 | 0.1526 | 0.0036 | 0.0227 | 0.0003 | 144 | 2 |
| 09GF-9 16 | 61   | 126  | 0.49 | 0.1654 | 0.0112 | 0.0240 | 0.0006 | 153 | 3 |
| 09GF-9 17 | 112  | 186  | 0.60 | 0.1554 | 0.0071 | 0.0224 | 0.0004 | 143 | 2 |
| 09GF-9 18 | 46   | 104  | 0.44 | 0.1408 | 0.0070 | 0.0222 | 0.0004 | 141 | 2 |
| 09GF-9 19 | 139  | 244  | 0.57 | 0.1653 | 0.0048 | 0.0214 | 0.0003 | 137 | 2 |
| 09GF-9 20 | 148  | 232  | 0.64 | 0.1437 | 0.0044 | 0.0225 | 0.0003 | 144 | 2 |
| 09GF-9 21 | 62   | 132  | 0.47 | 0.1509 | 0.0065 | 0.0224 | 0.0004 | 143 | 2 |
| 09GF-9 22 | 94   | 116  | 0.81 | 0.1689 | 0.0128 | 0.0220 | 0.0004 | 140 | 3 |
| 09GF-9 23 | 136  | 253  | 0.54 | 0.1521 | 0.0042 | 0.0225 | 0.0003 | 143 | 2 |
| 09GF-9 24 | 220  | 299  | 0.73 | 0.1496 | 0.0050 | 0.0220 | 0.0003 | 140 | 2 |



|             |     |      |      |        |        |        |        |     |     |
|-------------|-----|------|------|--------|--------|--------|--------|-----|-----|
| 09GF-21A 01 | 354 | 1011 | 0.35 | 0.155  | 2.04   | 0.024  | 1.53   | 150 | 2.3 |
| 09GF-21A 02 | 134 | 243  | 0.55 | 0.151  | 3.30   | 0.023  | 1.54   | 147 | 2.2 |
| 09GF-21A 03 | 70  | 169  | 0.41 | 0.155  | 3.39   | 0.023  | 1.50   | 149 | 2.2 |
| 09GF-21A 04 | 149 | 247  | 0.60 | 0.157  | 4.25   | 0.023  | 1.53   | 145 | 2.2 |
| 09GF-21A 05 | 185 | 293  | 0.63 | 0.150  | 3.33   | 0.023  | 1.53   | 146 | 2.2 |
| 09GF-21A 06 | 401 | 672  | 0.60 | 0.159  | 2.31   | 0.023  | 1.51   | 148 | 2.2 |
| 09GF-21A 07 | 76  | 248  | 0.31 | 0.163  | 3.97   | 0.025  | 1.57   | 157 | 2.4 |
| 09GF-21A 08 | 159 | 225  | 0.71 | 0.161  | 4.13   | 0.023  | 1.55   | 148 | 2.3 |
| 09GF-21A 09 | 709 | 1238 | 0.57 | 0.161  | 2.03   | 0.024  | 1.51   | 152 | 2.3 |
| 09GF-21A 10 | 504 | 769  | 0.66 | 0.158  | 2.24   | 0.023  | 1.51   | 148 | 2.2 |
| 09GF-21A 11 | 221 | 269  | 0.82 | 0.148  | 3.05   | 0.023  | 1.54   | 147 | 2.2 |
| 09GF-21A 12 | 222 | 349  | 0.64 | 0.164  | 3.51   | 0.024  | 1.51   | 152 | 2.3 |
| 09GF-21A 13 | 72  | 163  | 0.44 | 0.153  | 5.37   | 0.023  | 1.58   | 147 | 2.3 |
| 09GF-21A 14 | 265 | 445  | 0.60 | 0.156  | 4.59   | 0.023  | 1.67   | 148 | 2.5 |
| 09GF-21A 15 | 755 | 1760 | 0.43 | 0.160  | 2.13   | 0.024  | 1.51   | 151 | 2.2 |
| 09GF-21A 16 | 123 | 246  | 0.50 | 0.155  | 4.64   | 0.024  | 1.53   | 150 | 2.3 |
|             |     |      |      |        |        |        |        |     |     |
| 09GF-14A 01 | 447 | 577  | 0.78 | 0.147  | 3.04   | 0.022  | 1.53   | 140 | 2.1 |
| 09GF-14A 02 | 99  | 136  | 0.73 | 0.144  | 6.53   | 0.022  | 1.62   | 138 | 2.2 |
| 09GF-14A 03 | 468 | 609  | 0.77 | 0.146  | 3.68   | 0.021  | 1.51   | 136 | 2.0 |
| 09GF-14A 04 | 653 | 852  | 0.77 | 0.147  | 2.92   | 0.022  | 1.52   | 140 | 2.1 |
| 09GF-14A 05 | 297 | 428  | 0.69 | 0.144  | 3.44   | 0.022  | 1.53   | 139 | 2.1 |
| 09GF-14A 06 | 250 | 335  | 0.75 | 0.148  | 4.39   | 0.022  | 1.55   | 139 | 2.1 |
| 09GF-14A 07 | 431 | 544  | 0.79 | 0.144  | 3.47   | 0.022  | 1.51   | 139 | 2.1 |
| 09GF-14A 08 | 341 | 421  | 0.81 | 0.142  | 4.67   | 0.022  | 1.56   | 138 | 2.1 |
| 09GF-14A 09 | 406 | 515  | 0.79 | 0.146  | 2.79   | 0.022  | 1.50   | 141 | 2.1 |
| 09GF-14A 10 | 270 | 357  | 0.76 | 0.145  | 3.35   | 0.022  | 1.52   | 140 | 2.1 |
| 09GF-14A 11 | 324 | 500  | 0.65 | 0.144  | 4.02   | 0.022  | 1.53   | 141 | 2.1 |
| 09GF-14A 12 | 269 | 389  | 0.69 | 0.144  | 3.15   | 0.022  | 1.56   | 139 | 2.1 |
| 09GF-14A 13 | 404 | 512  | 0.79 | 0.146  | 3.30   | 0.022  | 1.58   | 140 | 2.2 |
| 09GF-14A 14 | 286 | 380  | 0.75 | 0.139  | 4.01   | 0.022  | 1.52   | 137 | 2.1 |
| 09GF-14A 15 | 657 | 752  | 0.87 | 0.150  | 3.18   | 0.022  | 1.52   | 142 | 2.1 |
| 09GF-14A 16 | 624 | 742  | 0.84 | 0.143  | 2.63   | 0.022  | 1.50   | 140 | 2.1 |
|             |     |      |      |        |        |        |        |     |     |
| 08JH153 22  | 333 | 119  | 2.79 | 0.1669 | 0.0061 | 0.0244 | 0.0005 | 155 | 3   |
| 08JH153 23  | 222 | 78   | 2.84 | 0.1707 | 0.0056 | 0.0246 | 0.0004 | 157 | 3   |
| 08JH153 24  | 441 | 144  | 3.07 | 0.1795 | 0.0054 | 0.0258 | 0.0004 | 164 | 3   |
|             |     |      |      |        |        |        |        |     |     |
| 08JH187 01  | 297 | 117  | 2.54 | 0.1482 | 0.0055 | 0.0218 | 0.0005 | 139 | 3   |
| 08JH187 02  | 588 | 305  | 1.93 | 0.1477 | 0.0037 | 0.0218 | 0.0004 | 139 | 3   |
| 08JH187 03  | 263 | 123  | 2.14 | 0.1577 | 0.0045 | 0.0229 | 0.0005 | 146 | 3   |
| 08JH187 04  | 561 | 218  | 2.57 | 0.1554 | 0.0041 | 0.0229 | 0.0005 | 146 | 3   |
| 08JH187 05  | 437 | 174  | 2.52 | 0.1547 | 0.0048 | 0.0237 | 0.0005 | 151 | 3   |
| 08JH187 06  | 274 | 224  | 1.22 | 0.1485 | 0.0063 | 0.0217 | 0.0005 | 138 | 3   |
| 08JH187 07  | 304 | 146  | 2.08 | 0.1560 | 0.0049 | 0.0232 | 0.0005 | 148 | 3   |
| 08JH187 08  | 223 | 108  | 2.06 | 0.1576 | 0.0090 | 0.0219 | 0.0007 | 140 | 4   |
| 08JH187 09  | 437 | 194  | 2.25 | 0.1510 | 0.0050 | 0.0221 | 0.0005 | 141 | 3   |
| 08JH187 10  | 618 | 319  | 1.94 | 0.1574 | 0.0037 | 0.0227 | 0.0004 | 144 | 3   |
| 08JH187 11  | 165 | 95   | 1.74 | 0.1634 | 0.0085 | 0.0233 | 0.0006 | 148 | 4   |
| 08JH187 12  | 325 | 165  | 1.97 | 0.1571 | 0.0125 | 0.0218 | 0.0006 | 139 | 4   |
| 08JH187 13  | 404 | 171  | 2.36 | 0.1746 | 0.0057 | 0.0242 | 0.0005 | 154 | 3   |
| 08JH187 14  | 192 | 104  | 1.84 | 0.1538 | 0.0058 | 0.0228 | 0.0005 | 145 | 3   |
| 08JH187 15  | 146 | 86   | 1.70 | 0.1580 | 0.0093 | 0.0219 | 0.0006 | 140 | 4   |
| 08JH187 16  | 351 | 151  | 2.33 | 0.1561 | 0.0054 | 0.0221 | 0.0005 | 141 | 3   |
| 08JH187 17  | 382 | 185  | 2.07 | 0.1463 | 0.0035 | 0.0217 | 0.0004 | 138 | 3   |
| 08JH187 18  | 233 | 140  | 1.66 | 0.1497 | 0.0060 | 0.0221 | 0.0005 | 141 | 3   |
| 08JH187 19  | 266 | 148  | 1.79 | 0.1646 | 0.0072 | 0.0242 | 0.0006 | 154 | 4   |
| 08JH187 20  | 513 | 191  | 2.69 | 0.1563 | 0.0044 | 0.0229 | 0.0005 | 146 | 3   |
| 08JH187 21  | 121 | 68   | 1.78 | 0.1563 | 0.0135 | 0.0220 | 0.0009 | 140 | 6   |
| 08JH187 22  | 317 | 177  | 1.79 | 0.1646 | 0.0067 | 0.0239 | 0.0006 | 152 | 4   |
| 08JH187 23  | 142 | 78   | 1.83 | 0.1590 | 0.0072 | 0.0234 | 0.0006 | 149 | 3   |
| 08JH187 24  | 690 | 270  | 2.56 | 0.1695 | 0.0046 | 0.0238 | 0.0005 | 152 | 3   |
|             |     |      |      |        |        |        |        |     |     |
| 08JH212 01  | 167 | 463  | 0.36 | 0.1829 | 0.0045 | 0.0262 | 0.0005 | 167 | 3   |
| 08JH212 02  | 162 | 409  | 0.39 | 0.1842 | 0.0099 | 0.0249 | 0.0007 | 159 | 5   |
| 08JH212 03  | 108 | 329  | 0.33 | 0.1826 | 0.0095 | 0.0260 | 0.0005 | 165 | 3   |
| 08JH212 04  | 120 | 341  | 0.35 | 0.1804 | 0.0044 | 0.0260 | 0.0005 | 166 | 3   |
| 08JH212 05  | 87  | 271  | 0.32 | 0.1875 | 0.0056 | 0.0257 | 0.0005 | 164 | 3   |
| 08JH212 06  | 232 | 454  | 0.51 | 0.1938 | 0.0041 | 0.0260 | 0.0005 | 166 | 3   |
| 08JH212 07  | 141 | 381  | 0.37 | 0.1800 | 0.0047 | 0.0260 | 0.0005 | 166 | 3   |
| 08JH212 08  | 179 | 515  | 0.35 | 0.1812 | 0.0051 | 0.0265 | 0.0006 | 168 | 3   |
| 08JH212 10  | 200 | 526  | 0.38 | 0.1747 | 0.0050 | 0.0256 | 0.0005 | 163 | 3   |
| 08JH212 11  | 151 | 449  | 0.34 | 0.1792 | 0.0040 | 0.0261 | 0.0005 | 166 | 3   |
| 08JH212 12  | 166 | 436  | 0.38 | 0.2283 | 0.0089 | 0.0275 | 0.0007 | 175 | 4   |
| 08JH212 13  | 136 | 398  | 0.34 | 0.1830 | 0.0083 | 0.0260 | 0.0005 | 166 | 3   |
| 08JH212 14  | 191 | 507  | 0.38 | 0.1760 | 0.0065 | 0.0253 | 0.0006 | 161 | 4   |
| 08JH212 15  | 195 | 530  | 0.37 | 0.1840 | 0.0093 | 0.0255 | 0.0005 | 162 | 3   |
| 08JH212 16  | 156 | 434  | 0.36 | 0.1636 | 0.0041 | 0.0256 | 0.0005 | 163 | 3   |



|            |     |     |      |        |        |        |        |     |   |
|------------|-----|-----|------|--------|--------|--------|--------|-----|---|
| 08JH212 17 | 197 | 454 | 0.43 | 0.1834 | 0.0062 | 0.0263 | 0.0006 | 167 | 4 |
| 08JH212 18 | 151 | 342 | 0.44 | 0.1866 | 0.0057 | 0.0259 | 0.0006 | 165 | 4 |
| 08JH212 21 | 169 | 453 | 0.37 | 0.1760 | 0.0050 | 0.0257 | 0.0005 | 163 | 3 |
| 08JH212 22 | 192 | 423 | 0.45 | 0.1873 | 0.0043 | 0.0259 | 0.0005 | 165 | 3 |
| 08JH212 23 | 147 | 407 | 0.36 | 0.1828 | 0.0082 | 0.0258 | 0.0005 | 164 | 3 |
| 08JH212 24 | 202 | 475 | 0.42 | 0.1794 | 0.0054 | 0.0258 | 0.0005 | 164 | 3 |

Notes: 1), Region numbers as marked in figure 1; 2), ratio of  $^{206}\text{Pb}/^{238}\text{U}$  versus  $^{207}\text{Pb}/^{235}\text{U}$  indicating concordance; 3) data with cross lines are zircons that are either discordant, or errors over 3-5%, or inherited.

# References cited

- Chen, C. H., Lee, C. Y., Lu, H. Y., and Hseh, P. S.: Generation of Late Cretaceous silicic rocks in SE China: Age, major element and numerical simulation constraints, *J. Asian Earth Sci.*, 31, 479-498, 2008.
- Duan, Z., Xing, G. F., Yu, M. G., Zhao, X. L., Jin, G. D., Chen, Z. H.: Time Sequence and Geological Process of Late Mesozoic Volcanic Activities in the Area of Zhejiang —Fujian Boundary, *Geol. Rev.* 59(3), 454-469 (in Chinese with English abstract), 2013.
- Guo, F., Fan, W., Li, C., Zhao, L., Li, H., and Yang, J.: Multi-stage crust–mantle interaction in SE China: temporal, thermal and compositional constraints from the Mesozoic felsic volcanic rocks in eastern Guangdong-Fujian provinces, *Lithos*, 150, 62-84, 2012.
- Li, C. L., Wang, Z. X., Wang, D. X., Cao, W. T., Yu, X. Q., Zhou, G. Z., and Gao, W. L.: Crust-mantle interaction triggered by oblique subduction of the Pacific plate: geochronological, geochemical, and Hf isotopic evidence from the Early Cretaceous volcanic rocks of Zhejiang Province, southeast China, *Intl. Geol. Rev.*, 56(14), 1732-1753, doi: 10. 1080/00206814.2014.956347, 2014.
- Li, L. M., Sun, M., Xing, G. F., Zhao, G. C., Zhou, M. F., Wong, J., and Chen, R.: Two late Mesozoic volcanic events in Fujian Province: constraints on the tectonic evolution of southeastern China, *Intl. Geol. Rev.*, 51, 216-251, 2009.
- Li, Y. N., Xing, G. F., Xing, X. L., Chen, S. Z., Duan, Z., Yang, D., and Hu, L. Y.: The discovery of Middle Jurassic volcanic rocks in northern Fujian Province and its geological significance, *Geol. Bull. China*, 34(12), 2227-2235 (in Chinese with English abstract), 2015.
- Liu, L., Xu, X. S., and Xia, Y.: Asynchronizing paleo-Pacific slab rollback beneath SE China: Insights from the episodic Late Mesozoic volcanism, *Gond. Res.*, 37, 397-407, 2016.
- Liu, L., Xu, X. S., and Zou, H. B. Episodic eruptions of the Late Mesozoic volcanic sequences in southeastern Zhejiang, SE China: petrogenesis and implications for the geodynamics of paleo-Pacific subduction, *Lithos*, 154, 166-180, 2012.
- Zhang, J. H., Yang, J. H., Chen, J. Y., Wu, F. Y., and Wilde, S. A.: Genesis of late Early Cretaceous high-silica rhyolites in eastern Zhejiang Province, southeast China: A crystal mush origin with mantle input, *Lithos*, 296-299, 482-495, 2018.
